# Supplementary material for: Arabidopsis MDN1 Is Involved in the Establishment of a Normal Seed Proteome and Seed Germination
Source: Front Plant Sci. 2019 Sep 10;10:1118. doi: 10.3389/fpls.2019.01118 (PMC6746975; doi:10.3389/fpls.2019.01118)
Supplement: Supplementary file 4 [file Table_1.xlsx]

## Sheet: Sheet1
Supplementary Dataset S1. The identified peptides by iTRAQ-based LC-MS/MS.
PSMs, the number of peptide spectrum matches.
Proteins, the number of proteins containing the identified peptide.
Protein Groups, the number of protein groups containing the identified peptide.
xxx/xxx, quantitative ratio of each sample to the internal reference.
PEP, posterior error probability of the identification (the probability that the observed PSM is incorrect).
q-value, the minimal false discovery rate at which the identification is considered correct.
						113/(113+114+115+116+117+118)	114/(113+114+115+116+117+118)	115/(113+114+115+116+117+118)	116/(113+114+115+116+117+118)	117/(113+114+115+116+117+118)	118/(113+114+115+116+117+118)
Peptide Sequence	# PSMs	# Proteins	# Protein Groups	Protein Group Accessions	Peptide Modifications	wt_rep1/ref	wt_rep2/ref	wt_rep3/ref	mdn1-1_rep1/ref	mdn1-1_rep2/ref	mdn1-1_rep3/ref	q-Value	PEP
PFYLAGNNPQGQVWLQGR	22	2	1	P15455								0	2.576e-15
sGGGGGYSGGGGGGYSGGGGGGYER	5	1	1	Q03251	N-Term(iTRAQ8plex)	0.75845	0.748818	0.693272	1.29468	1.21042	1.47229	0	6.07756e-22
dLQQEIQEGEIEIPEN	4	1	1	Q9LFH5	N-Term(iTRAQ8plex)	0.83224	0.779952	0.796921	1.15171	1.24383	1.21064	0	2.535e-12
lGGGGGVSSGGGSGVGSGSSNMLR	3	1	1	Q9FKK1	N-Term(iTRAQ8plex)	1.02782	0.866861	0.984545	1.14024	1.00648	1.0633	0	2.772e-20
aGELSAAEIDNLMTIVANPR	6	2	1	P34788	N-Term(iTRAQ8plex)	1.04605	0.948316	0.962058	0.862826	1.08107	0.90053	0	1.451e-20
INVETAQQLQNQQDNR	5	1	1	P15456								0	2.578e-13
iDVLINNAAEQYESSTIEEIDEPR	4	1	1	Q9FZ42	N-Term(iTRAQ8plex)	0.96432	1.01464	1.08012	1.06025	1.03049	0.833908	0	1.069e-17
eGGGGYGGGEGGGYGGSGGGGGW	6	3	1	Q03250	N-Term(iTRAQ8plex)	0.76155	0.781743	0.838071	1.28041	1.35937	1.15092	0	3.354e-18
vFHLAGNNQQGGFGGSQQQQEQk	89	2	1	Q96318	N-Term(iTRAQ8plex); K23(iTRAQ8plex)	0.8275	0.926227	0.844404	1.10809	1.35816	1.08336	0	3.495e-19
aGGIGGLGGLGGAGGGLGGVGGLGk	5	2	1	O23018	N-Term(iTRAQ8plex); K25(iTRAQ8plex)	0.692486	0.733225	0.73676	1.31703	1.4243	1.34317	0	6.322e-21
VTSVNSYTLPILEYVR	23	2	1	Q96318								0	1.194e-11
NLWSGFDAQVIAQALk	38	2	1	Q96318	K16(iTRAQ8plex)	0.664417	0.784522	0.477638	0.595265	2.98871	0.644825	0	2.34e-12
vVPGcAETFmDSQPMQGQQQGQPWQGR	97	2	1	Q96318	N-Term(iTRAQ8plex); C5(Carbamidomethyl); M10(Oxidation)	1.02335	1.04102	1.06919	0.911314	0.889327	0.929581	0	6.521e-12
eVAAFAQFGSDLDAATQALLNR	2	5	1	P92549	N-Term(iTRAQ8plex)	0.901006	1.02945	0.758349	1.08069	1.21873	1.11289	0	1.246e-16
mQNEEGQVTELYIPR	4	1	1	Q3E902	N-Term(Acetyl)							0	3.545e-11
vIPGcAETFQDSSEFQPR	59	1	1	P15455	N-Term(iTRAQ8plex); C5(Carbamidomethyl)	1.17195	1.08514	1.21275	0.778587	0.789128	0.78781	0	4.122e-16
lASVPSGGGGGVAVASATSGGGGGGGASAAESk	2	1	1	Q9SLF7	N-Term(iTRAQ8plex); K33(iTRAQ8plex)	1.00402	0.927481	0.973676	1.07581	1.12095	0.961976	0	4.581e-13
vSDAAGLGGPVFGAGk	5	1	1	Q9SJ17	N-Term(iTRAQ8plex); K16(iTRAQ8plex)	0.569374	0.632693	0.45989	1.49447	1.86772	1.44891	0	1.016e-19
gLPLEVITNGFQISPEEAR	12	2	1	P15455	N-Term(iTRAQ8plex)	0.992781	1.19478	0.999206	0.903854	0.958639	0.876201	0	2.326e-16
gTVELAGTDGETTTQGLDGLGDR	2	1	1	Q9LF98	N-Term(iTRAQ8plex)	0.88898	0.95449	1.08978	0.936889	1.15624	1.04094	0	6.375e-13
sQVFTTYQDQQTTVSIQVFEGER	3	3	2	Q9LKR3;Q39043	N-Term(iTRAQ8plex)							0	5.535e-16
QQGTcPYTVVVMTScLSPESTR	8	1	1	B9DGU8	C5(Carbamidomethyl); C15(Carbamidomethyl)							0	2.016e-10
iGEGPVAQcISGFTALDIPPPR	31	1	1	Q8VYL3	N-Term(iTRAQ8plex); C9(Carbamidomethyl)	1.00871	0.832853	1.01565	1.07236	1.02311	1.05839	0	6.031e-17
vTAAVPSGASTGIYEALELR	6	2	1	P25696	N-Term(iTRAQ8plex)	1.20939	1.13458	1.16756	0.890048	0.771157	0.817155	0	1.963e-12
vIPGcAETFMESPVFGEGQGQGQSQGFR	39	1	1	P15456	N-Term(iTRAQ8plex); C5(Carbamidomethyl)	0.946269	0.945181	0.997868	1.07643	1.18067	1.04087	0	1.865e-17
IDVQLAQQLQNQQDSR	9	1	1	Q96318								0	1.706e-12
pFYLAGNNPQGQVWLQGR	83	2	1	P15455	N-Term(iTRAQ8plex)	0.934496	0.960462	1.12899	1.20737	0.697496	1.12843	0	6.24e-16
nLWSGFDAQVIAQALk	233	2	1	Q96318	N-Term(iTRAQ8plex); K16(iTRAQ8plex)	0.881947	0.931016	0.924925	1.17149	1.15296	1.0909	0	1.147e-17
aLPLEVISNGFQISPEEAR	37	2	1	Q96318	N-Term(iTRAQ8plex)	0.819097	0.995082	0.83175	1.20231	1.24539	1.12182	0	3.508e-13
vTPVSPVLAQFLGTGETSR	2	2	1	Q9SS61	N-Term(iTRAQ8plex)	0.935653	0.98491	0.837372	1.03969	1.14618	1.1322	0	1.252e-10
gAAGAESAATAFAFGAGNVDPTR	3	1	1	Q84WS0	N-Term(iTRAQ8plex)	1.11323	1.03099	1.0927	0.959675	1.04322	0.867758	0	4.047e-19
QGQQGQPWEGQGQQGQQGR	17	2	1	Q96318								0	1.411e-10
eGGGYGGGDGGSYGGGGGGW	5	2	1	Q03251	N-Term(iTRAQ8plex)	0.771278	0.827377	0.780929	1.13034	1.4303	1.32809	0	5.55e-15
vFISELLVDQMSSQTQDVIR	2	1	1	Q9LMJ7	N-Term(iTRAQ8plex)	1.46061	0.822761	1.03368	0.801358	0.893727	0.881111	0	3.622e-15
PFLIAGNNPQGQEWLQGR	4	1	1	P15456								0	1.935e-14
vVPGcAETFMDSQPMQGQQQGQPWQGR	75	2	1	Q96318	N-Term(iTRAQ8plex); C5(Carbamidomethyl)	1.04612	1.01858	1.07918	0.909722	0.998934	0.959493	0	4.514e-14
hVVFGQVVEGLDVVk	27	3	2	Q9SKQ0;P34790	N-Term(iTRAQ8plex); K15(iTRAQ8plex)							0	2.113e-14
nIFNGFGPEVIAQALk	52	2	1	P15455	N-Term(iTRAQ8plex); K16(iTRAQ8plex)	0.847214	1.13852	0.90261	1.0853	1.06529	0.994815	0	1.634e-11
aLVAIPTTIADNAGLDSAELVAQLR	1	1	1	Q940P8	N-Term(iTRAQ8plex)	1.2659	1.00238	0.961247	0.969195	0.955012	0.839013	0	2.215e-16
sTLTDSLVAAAGIIAQEVAGDVR	1	1	1	Q9ASR1	N-Term(iTRAQ8plex)	1.64945	0.851206	0.809767	0.7804	0.87907	0.940763	0	1.192e-19
dVEDTVADQAQYAk	4	2	1	Q84W88	N-Term(iTRAQ8plex); K14(iTRAQ8plex)	0.995678	1.11417	1.06961	0.916036	0.990519	0.959266	0	6.852e-15
vGEGPVAQcISGFIALDVAPPR	7	4	1	O65390	N-Term(iTRAQ8plex); C9(Carbamidomethyl)	1.15265	1.06184	0.969816	0.929602	1.0258	0.969524	0	3.354e-17
vIPGcAETFmESPVFGEGQGQGQSQGFR	38	1	1	P15456	N-Term(iTRAQ8plex); C5(Carbamidomethyl); M10(Oxidation)	0.881345	0.864065	0.873636	1.18399	1.14382	1.1509	0	5.222e-17
eGQIYLASPYTAAASALTGR	2	2	1	Q94AR8	N-Term(iTRAQ8plex)	1.08265	1.04174	0.994929	0.960728	0.962931	0.978224	0	4.197e-17
fQGMHGQQQVQHVFQTAk	60	1	1	Q9FH31	N-Term(iTRAQ8plex); K18(iTRAQ8plex)	0.404703	0.434181	0.433868	1.62616	1.99194	1.54159	0	2.656e-19
QGQQGQPWEGQGQQGQQGFR	17	2	1	Q96318								0	5.947e-10
vGPEGGLAELIVDEAEGR	5	1	1	Q9M1J6	N-Term(iTRAQ8plex)	1.03455	1.13592	1.13179	0.783983	1.0423	0.786764	0	4.419e-15
aVGYcFASEGATVAFTYVk	7	1	1	Q9FZ42	N-Term(iTRAQ8plex); C5(Carbamidomethyl); K19(iTRAQ8plex)	1.11837	1.1691	1.25635	0.83238	0.89874	0.751354	0	4.539e-15
lLYMTGTGMSEDTALNk	14	2	1	P0DKC6	N-Term(iTRAQ8plex); K17(iTRAQ8plex)	0.916824	1.31119	0.879396	0.977772	1.02279	0.911844	0	4.24e-16
IDLQTAQQLQNQDDNR	3	2	1	P15455								0	2.374e-10
qLALQEGLLVGISSGAAAAAAIQVAk	2	1	1	P47999	N-Term(iTRAQ8plex); K26(iTRAQ8plex)	1.18241	1.04347	1.09919	0.91772	0.787762	0.934426	0	2.422e-15
qAGGVGAAGPGAGGGVGGGGAYSSAR	1	1	1	Q8VZU9	N-Term(iTRAQ8plex)	0.908327	0.801314	1.01016	1.20904	0.960304	1.23953	0	3.08e-18
iQQVGEcPFQTTIPFFPPY	19	1	1	P15458	N-Term(iTRAQ8plex); C7(Carbamidomethyl)	1.30812	0.75385	0.904278	1.09203	1.25288	1.15181	0	3.039e-12
sGGGGGYSGGGGSYGGGGGR	4	1	1	Q03250	N-Term(iTRAQ8plex)	0.711205	0.758475	0.776839	1.29042	1.30849	1.34876	0	3.2e-16
dAAASAQDSLQQTGQQMk	20	1	1	Q9M892	N-Term(iTRAQ8plex); K18(iTRAQ8plex)	0.664105	0.726917	0.657987	1.44084	1.48371	1.30243	0	1.043e-19
ISTLNSLNLPVLR	5	1	1	Q9ZWA9								0	7.46e-09
vTTEFVGGQVVGQYVEPR	6	1	1	Q9LJ97	N-Term(iTRAQ8plex)	0.933999	0.965485	0.924797	1.04418	1.09832	1.09616	0	1.432e-14
iVAmSSSAAWLTAPR	15	2	1	P0DKC6	N-Term(iTRAQ8plex); M4(Oxidation)	1.0526	1.06265	1.05707	0.97178	0.839825	0.98497	0	2.279e-12
aEEPWFGIEQEYTLLk	5	1	1	Q8GXW5	N-Term(iTRAQ8plex); K16(iTRAQ8plex)	1.05237	1.13385	1.10478	0.864815	1.00903	0.822068	0	1.449e-12
xDGILGLGFQEISVGk	28	3	1	O65390	N-Term(iTRAQ8plex); X1(F); K16(iTRAQ8plex)	1.18046	1.21645	1.2749	0.804932	0.782912	0.690707	0	5.352e-17
gTIFGALGNVTEAIk	10	4	1	Q9SKP0	N-Term(iTRAQ8plex); K15(iTRAQ8plex)	0.704362	0.789924	0.752582	1.26638	1.47285	1.21551	0	5.008e-14
mNAEGAAVQGSGWVWFGLDR	15	1	1	Q9LYK8	N-Term(iTRAQ8plex)	1.14984	1.07753	1.04993	0.902873	0.867582	0.875445	0	1.101e-16
aNVDPALVQEVVFGNVLSANLGQAPAR	4	1	1	Q8S4Y1	N-Term(iTRAQ8plex)	1.06539	1.07687	1.16133	0.633571	0.970392	0.80809	0	2.052e-17
aEAAASLAAEDLk	13	2	1	Q9LF88	N-Term(iTRAQ8plex); K13(iTRAQ8plex)	0.570303	0.716401	0.670958	1.40528	1.69279	1.33025	0	5.366e-15
tGEVIAHVAEGDAEDINR	2	1	1	Q9SU63	N-Term(iTRAQ8plex)	1.05217	0.920041	1.08657	1.12073	0.937318	0.932196	0	4.366e-15
gDEIQVQIENENVLVVSGk	9	1	1	O81822	N-Term(iTRAQ8plex); K19(iTRAQ8plex)	0.867798	0.911648	0.981873	1.0442	1.17884	1.01977	0	6.87e-16
dANTQGIYDAcTATASALcEAGIR	1	1	1	Q9M1R2	N-Term(iTRAQ8plex); C11(Carbamidomethyl); C19(Carbamidomethyl)	0.906276	0.794014	0.867407	1.11968	1.19176	1.27431	0	1.447e-11
fVTSLAADMDDHILk	35	1	1	Q39132	N-Term(iTRAQ8plex); K15(iTRAQ8plex)	0.898445	0.899916	0.943454	1.13779	1.14077	1.1207	0	1.25e-16
iVDIPTSALAFDPATGAGTIFDSGTVYTR	2	2	1	Q8L934	N-Term(iTRAQ8plex)	0.931649	0.823711	1.13635	1.01882	0.939922	1.2207	0	6.815e-14
eNPTVNAAVILDGSPVTADFR	6	1	1	Q9ZV18	N-Term(iTRAQ8plex)	0.741673	0.694963	0.735565	1.23162	1.46252	1.3572	0	4.941e-19
iDLQTAQQLQNQDDNR	82	2	1	P15455	N-Term(iTRAQ8plex)	0.938152	0.923259	0.965032	1.07775	1.17271	1.07174	0	1.344e-15
iVAMSSSAAWLTAPR	19	2	1	P0DKC6	N-Term(iTRAQ8plex)	1.10649	0.977098	1.1096	0.997871	0.818852	1.03058	0	2.812e-13
TNENAMISTLAGR	9	2	1	Q96318								0	1.115e-06
QGQPWEGQGQQGQQGR	15	2	1	Q96318								0	1.044e-09
sENLFESQGGPIILSQIENEYGR	1	1	1	Q9SCV9	N-Term(iTRAQ8plex)	1.08407	0.977822	0.988906	0.847376	1.10242	1.02778	0	2.236e-14
LFTSQNYSYFAPTSR	1	1	1	Q9LUJ7								0	3.45e-09
iMGMSDLGVSV	1	2	1	Q84K90	N-Term(iTRAQ8plex)	1.16609	1.11527	1.05086	0.856561	0.808681	0.968761	0	1.365e-07
aVGNVNNIIGPALIGk	7	2	1	P25696	N-Term(iTRAQ8plex); K16(iTRAQ8plex)	1.03446	1.21675	1.05439	0.977016	0.960967	0.76821	0	1.325e-13
aENLEFMVNLVk	6	1	1	Q9SV68	N-Term(iTRAQ8plex); K12(iTRAQ8plex)	0.758832	0.836423	0.707378	1.30672	1.41094	1.20758	0	2.525e-11
gGGGGGGAELETVEIDSASDEDVQNYR	2	1	1	Q9FJS3	N-Term(iTRAQ8plex)	0.646367	0.69472	0.623491	1.65919	1.38329	1.30562	0	7.395e-19
aVAGTVEGAVGYAGHk	20	3	1	Q9SIN3	N-Term(iTRAQ8plex); K16(iTRAQ8plex)	0.860473	0.939919	0.896172	1.07139	1.18459	1.09734	0	6.232e-17
lFQVEYAIEAIk	6	2	2	O81149;Q42134	N-Term(iTRAQ8plex); K12(iTRAQ8plex)							0	4.791e-13
vSNTVQGVTcLVVSPAER	4	1	1	Q9FK91	N-Term(iTRAQ8plex); C10(Carbamidomethyl)	1.00667	1.05705	1.17743	0.996408	0.781218	0.978719	0	6.856e-19
vHQPNYEDDVGFGGYGGYGAGSDYk	28	1	1	Q42431	N-Term(iTRAQ8plex); K25(iTRAQ8plex)	1.03953	1.1595	1.04041	0.875228	1.03561	0.778037	0	4.367e-17
iQVVNDNGQNVLDQQVQk	70	2	1	Q96318	N-Term(iTRAQ8plex); K18(iTRAQ8plex)	0.765404	0.917363	0.756592	1.19222	1.39118	1.13699	0	1.037e-13
qGQPWEGQGQQGQQGR	106	2	1	Q96318	N-Term(iTRAQ8plex)	0.901162	0.968049	0.971837	1.11169	1.08655	1.12833	0	8.661e-15
lDHLVNNAGMTQISMFENIEDITR	7	1	1	P0DKC6	N-Term(iTRAQ8plex)	1.04023	0.895798	0.923317	0.992308	1.14135	1.01616	0	1.055e-15
aAAVGWTAAHFTTEk	18	3	1	Q9SIN3	N-Term(iTRAQ8plex); K15(iTRAQ8plex)	0.872797	0.84626	0.889788	1.13434	1.34139	1.07338	0	1.916e-16
vAGATASASAESGPk	3	1	1	Q9ZUX4	N-Term(iTRAQ8plex); K15(iTRAQ8plex)	0.839605	0.814231	0.934031	1.24994	1.163	1.0978	0	1.857e-17
gQGSIQQLLAAEVEAQHIVNAAR	1	1	1	O82628	N-Term(iTRAQ8plex)	0.68766	0.755289	0.713359	1.29112	1.39928	1.42288	0	3.021e-19
iDVQLAQQLQNQQDSR	185	1	1	Q96318	N-Term(iTRAQ8plex)	0.926688	0.927481	0.918538	1.13987	1.16733	1.14718	0	3.158e-13
aAQAAGASSGGAAGGk	2	1	1	Q8GXU7	N-Term(iTRAQ8plex); K16(iTRAQ8plex)	0.609732	0.729528	0.623017	1.37762	1.59644	1.3537	0	1.656e-14
tLLGAEVFEVDPDDYITSVEVQSDR	1	1	1	Q9LIF8	N-Term(iTRAQ8plex)	0.863843	0.876878	0.878212	1.06737	1.3204	1.14627	0	2.304e-17
qcSSGLQAVADVAAAIk	5	2	2	Q56WD9;Q8LF48	N-Term(iTRAQ8plex); C2(Carbamidomethyl); K17(iTRAQ8plex)							0	1.028e-17
gDSDAVIVIVLDVTNR	46	1	1	Q9ZWA9	N-Term(iTRAQ8plex)	1.02547	0.962228	0.971884	1.01203	1.08882	0.974483	0	3.843e-15
vVPGcAETFmDSQPmQGQQQGQPWQGR	30	2	1	Q96318	N-Term(iTRAQ8plex); C5(Carbamidomethyl); M10(Oxidation); M15(Oxidation)	0.915899	1.0127	0.962055	1.0266	1.03852	1.06121	0	2.132e-12
qGQQGQPWEGQGQQGQQGR	103	2	1	Q96318	N-Term(iTRAQ8plex)	0.952569	0.966335	0.988639	1.1251	0.955949	1.11255	0	7.531e-14
SEAGQIEYWDHNHPQLR	7	2	1	Q96318								0	2.062e-11
tNDNAYINTLSGQTSYLR	18	1	1	Q9ZWA9	N-Term(iTRAQ8plex)	1.05343	1.03991	1.00543	0.977902	0.865587	0.951132	0	5.905e-17
fNTLETTLTHSSGPASYGR	39	2	1	P15455	N-Term(iTRAQ8plex)	0.849983	1.14563	0.772359	0.952849	1.24487	0.997392	0	3.613e-16
sSIGTGYDLSVTTFSPDGR	1	1	1	O23715	N-Term(Acetyl)							0	1.55e-08
aLSDAADQANYGLAVLR	2	1	1	Q9ZPY7	N-Term(iTRAQ8plex)	0.940067	1.01	0.926302	0.994319	1.06956	1.13976	0	1.678e-16
lWHSHDYEIQTGLLVTPR	14	1	1	Q941A4	N-Term(iTRAQ8plex)	0.993507	1.14239	1.10492	0.945518	0.916197	0.901833	0	8.731e-14
iGEGVESQcTSGFTAMDIAPPR	6	3	1	F4JGD2	N-Term(iTRAQ8plex); C9(Carbamidomethyl)	0.770598	0.803642	0.901178	1.20043	1.14248	1.18045	0	3.712e-15
lALALGDENAVSMPVAAAANEAFk	1	1	1	Q9LSV0	N-Term(iTRAQ8plex); K24(iTRAQ8plex)	1.01299	0.876163	0.941267	1.04973	1.09091	1.12017	0	1.931e-13
iMDDIFYEQVWNSNPALR	10	1	1	Q8L831	N-Term(iTRAQ8plex)	0.947608	1.00959	0.888258	1.00146	1.17404	0.998475	0	2.144e-17
aGDVLDFDMEGVWR	5	3	1	Q8GXW0	N-Term(iTRAQ8plex)	1.09201	1.1065	1.10697	0.889407	0.864653	0.82874	0	6.497e-09
lAEEGFDNDAVEASMNTIEFSLR	1	2	1	Q9LJL3	N-Term(iTRAQ8plex)	1.00224	0.713443	1.14945	1.10642	0.888815	1.21721	0	3.095e-13
aVLSSSGFQADVk	2	2	1	P42742	N-Term(iTRAQ8plex); K13(iTRAQ8plex)	0.908705	1.13009	0.997924	0.99653	1.10965	0.926037	0	3.973e-13
sLLPFFDSAYQGFASGSLDTDAQSVR	3	2	1	P46645	N-Term(iTRAQ8plex)	0.540147	0.958151	1.03408	1.03724	0.875414	1.54734	0	1.087e-17
gLPLEVITNGYQISPEEAk	12	1	1	P15456	N-Term(iTRAQ8plex); K19(iTRAQ8plex)	0.91784	1.41391	1.00762	0.90735	0.994002	0.869777	0	5.756e-16
aSFPEGFMFGTATAAFQVEGAVNEGcR	7	1	1	Q9LIF9	N-Term(iTRAQ8plex); C26(Carbamidomethyl)	1.03799	1.01001	1.01556	0.988807	0.913466	1.00278	0	2.567e-14
sDLDIVSNAScTTNcLAPLAk	6	3	2	P25858;Q9FX54	N-Term(iTRAQ8plex); C11(Carbamidomethyl); C15(Carbamidomethyl); K21(iTRAQ8plex)							0	2.071e-13
cFVGGLAWATNDEDLQR	4	7	1	Q03251	N-Term(iTRAQ8plex); C1(Carbamidomethyl)	1.04738	0.930216	1.08872	1.04115	0.925646	1.0672	0	3.854e-15
vLNLEEGGAFTNSSAEDMLk	6	1	1	Q949U7	N-Term(iTRAQ8plex); K20(iTRAQ8plex)	1.04243	1.09866	1.09067	0.929891	0.960819	0.790016	0	1.348e-15
vTGAEVILGQI	4	1	1	Q9M7T0	N-Term(iTRAQ8plex)	0.724325	0.737511	0.650742	1.5008	1.28405	1.42961	0	3.055e-08
tFLAGEENLLSNLNPAATR	27	1	1	Q9LUJ7	N-Term(iTRAQ8plex)	1.01419	1.0216	1.00734	0.963659	0.989704	0.992254	0	3.52e-14
gQLVVIPQGFAYVVQSHGNk	116	2	1	Q96318	N-Term(iTRAQ8plex); K20(iTRAQ8plex)	0.725839	0.671266	0.768839	1.31786	1.59259	1.24239	0	9.682e-14
aVELDTESDGSQIQSGLAEWTGQR	4	2	1	Q9FNE2	N-Term(iTRAQ8plex)	0.765458	0.689296	0.767051	1.37916	1.42719	1.22172	0	1.602e-13
vTAPGGISFEDGIENIDIGGPAMIR	1	2	1	O64767	N-Term(iTRAQ8plex)	0.892088	0.829543	0.822545	1.19351	1.06476	1.35908	0	1.393e-10
gNAYAQIAIGTDDVYk	3	5	2	O65398;Q8W593	N-Term(iTRAQ8plex); K16(iTRAQ8plex)							0	1.425e-15
dGFVMGEGAGVLLLEELEHAk	7	2	1	Q9C9P4	N-Term(iTRAQ8plex); K21(iTRAQ8plex)	1.10446	1.05857	1.05177	0.960762	0.87158	0.942985	0	2.487e-14
qSDAPQEALQVLDIVLR	2	1	1	O04379	N-Term(iTRAQ8plex)	1.49307	1.0535	1.23741	0.611168	0.577842	0.835774	0	2.864e-12
pFLIAGNNPQGQEWLQGR	7	1	1	P15456	N-Term(iTRAQ8plex)	0.72339	0.847128	0.938813	1.44421	0.828747	1.36631	0	3.263e-14
dSVVLSGGPDYAVPLGR	5	2	1	Q96520	N-Term(iTRAQ8plex)	1.01491	1.11015	0.99339	0.958887	0.905159	1.10763	0	5.113e-12
iPSGVTNFITNTNQTVPLR	20	1	1	Q9LUJ7	N-Term(iTRAQ8plex)	0.730233	0.772119	0.746001	1.27205	1.38067	1.30621	0	5.166e-12
gDLGAQIPLEQVPAAQQR	3	1	1	Q9LIK0	N-Term(iTRAQ8plex)	0.950887	1.11025	0.888945	1.08925	1.00636	1.04054	0	5.833e-14
lVPLLTEAGAIADNSSQL	2	1	1	Q8L8T2	N-Term(iTRAQ8plex)	1.27223	1.20424	1.21751	0.73932	0.708256	0.740586	0	2.085e-11
tVVEFEEDDDVSNPQQGk	4	1	1	Q9FH31	N-Term(iTRAQ8plex); K18(iTRAQ8plex)	0.800955	0.633	0.644063	1.35588	1.49371	1.32038	0	5.653e-16
lAALADVYVNDAFGTAHR	6	2	1	Q9SAJ4	N-Term(iTRAQ8plex)	1.12577	1.05339	1.18469	0.932518	0.71102	0.914998	0	5.763e-15
eSGGGLGGMLHR	22	2	1	F4K0K7	N-Term(iTRAQ8plex)	0.766056	0.707627	0.695651	1.40928	1.39125	1.30058	0	3.164e-11
gVTTIIGGGDSVAAVEk	4	7	3	F4I3L1;Q9LD57;Q9SAJ4	N-Term(iTRAQ8plex); K17(iTRAQ8plex)							0	3.058e-17
dEALFSANAAALASR	3	1	1	O50008	N-Term(iTRAQ8plex)	1.01133	1.32141	1.09163	0.836741	0.762416	0.814357	0	5.145e-12
vLPGVVALDEATPVTV	2	2	1	F4I3L1	N-Term(iTRAQ8plex)	1.01541	0.863539	1.04274	0.972672	1.19399	0.967977	0	8.481e-07
aLAGSPIGGEDILQNTIR	2	1	1	Q9SKY8	N-Term(iTRAQ8plex)	0.975139	0.961238	1.03468	0.994364	1.08588	1.01226	0	3.66e-13
lAPILDEVAVSYQSDSSVVIAk	6	2	1	Q9XI01	N-Term(iTRAQ8plex); K22(iTRAQ8plex)	1.10958	0.972377	1.02378	0.988971	0.93424	0.929454	0	1.186e-12
qLINSGPVIASQLLLVDEVIR	1	2	2	Q8L7N0;Q9M888	N-Term(iTRAQ8plex)							0	5.641e-13
YNMNANEILYcTGGQGR	8	2	1	Q96318	C11(Carbamidomethyl)							0	3.524e-09
lNPLVSSLSLYDIANTPGVAADVGHINTR	3	3	2	Q9ZP06;Q9LKA3	N-Term(iTRAQ8plex)							0	1.002e-15
aADAFVELADASGYGLAVMPSAk	3	1	1	Q9FFT4	N-Term(iTRAQ8plex); K23(iTRAQ8plex)	1.09624	1.09871	1.10825	0.844958	0.998997	0.674552	0	8.842e-12
vTVANVESGGEFTVSSADDILk	5	1	1	Q9XEX2	N-Term(iTRAQ8plex); K22(iTRAQ8plex)	1.07359	1.00454	0.998381	0.886186	1.15188	0.904392	0	1.621e-12
dSLVGLAVEAATk	3	2	1	B9DHF9	N-Term(iTRAQ8plex); K13(iTRAQ8plex)	1.16607	1.24225	1.15621	0.759562	0.825358	0.773857	0	1.055e-13
tTSNILSADPYSLSYDR	5	1	1	Q9LZJ2	N-Term(iTRAQ8plex)	0.84149	0.852868	0.888647	1.23698	1.01933	1.2298	0	3.174e-15
TNDNAYINTLSGQTSYLR	4	1	1	Q9ZWA9								0	3.484e-12
mETYVDAIGEDTAATTTTAETAANk	2	3	1	F4J5V2	N-Term(Acetyl); K25(iTRAQ8plex)	1.00461	0.828244	1.04294	1.20497	0.912471	1.04676	0	6.853e-13
gFFEVTHDISNLTcADFLR	8	9	2	B9DHU0;P25819	N-Term(iTRAQ8plex); C14(Carbamidomethyl)							0	1.77e-17
gVVATTDAVEGcTGVNVAVMVGGFPR	2	2	1	P93819	N-Term(iTRAQ8plex); C12(Carbamidomethyl)	1.1059	0.953713	1.0105	0.993883	1.02067	0.945755	0	2.293e-16
qGQQGQPWEGQGQQGQQGFR	116	2	1	Q96318	N-Term(iTRAQ8plex)	0.93062	0.940242	0.966841	1.12425	0.970214	1.13979	0	3.724e-15
iSPDPVVSGAAATFk	7	1	1	Q9LXQ2	N-Term(iTRAQ8plex); K15(iTRAQ8plex)	1.02032	1.1396	1.02887	0.975665	0.970523	0.876076	0	7.657e-11
vAILGAAGGIGQPLALLMk	8	1	1	Q9ZP06	N-Term(iTRAQ8plex); K19(iTRAQ8plex)	0.833369	0.831387	0.718562	1.24858	1.18137	1.17864	0	9.965e-12
sEEGGEIVFGGVDPk	10	1	1	Q8VYL3	N-Term(iTRAQ8plex); K15(iTRAQ8plex)	1.10151	1.12999	1.14871	0.755174	0.957364	0.783072	0	5.626e-13
aSGDYAIVIAHNPDSDTTR	2	1	1	P46286	N-Term(iTRAQ8plex)	1.02301	1.00543	1.06272	0.977645	1.07999	0.893358	0	1.134e-15
aNLPTVLVTGASGR	4	1	1	Q94EG6	N-Term(Acetyl)							0	2.401e-07
vVTITDcGQLS	2	1	1	Q42406	N-Term(iTRAQ8plex); C7(Carbamidomethyl)	1.06223	0.873957	0.997188	1.01246	0.952482	1.14679	0	8.967e-07
aGFYDIGIGAGLESMTTNPMAWEGSVNPAVk	3	1	1	Q56WD9	N-Term(iTRAQ8plex); K31(iTRAQ8plex)	0.807067	0.782967	0.774995	1.20413	1.52806	1.15903	0	6.526e-15
iELSSLTQTNMSLPFITATADGPk	3	2	2	Q9LTX9;Q9STW6	N-Term(iTRAQ8plex); K24(iTRAQ8plex)							0	2.03e-14
tILGSVGAETEDSQIELLLk	5	3	1	Q9SLF7	N-Term(iTRAQ8plex); K20(iTRAQ8plex)	0.946253	0.909445	1.12099	1.07119	1.06362	0.975547	0	6.08e-14
aAPIVDAEYLk	1	1	1	Q42564	N-Term(Acetyl); K11(iTRAQ8plex)	1.03503	0.888324	1.01998	0.907955	0.940404	1.25299	0	8.318e-07
aDVAEVcIQALLFEEAk	8	1	1	Q94EG6	N-Term(iTRAQ8plex); C7(Carbamidomethyl); K17(iTRAQ8plex)	0.897365	0.768695	0.955061	1.04348	1.30422	1.03629	0	1.296e-11
lNLPILPTTTIGSFPQTVELR	4	2	1	O50008	N-Term(iTRAQ8plex)	1.19414	1.17232	1.08105	0.617333	0.865547	0.798219	0	3.065e-13
pVSPEMQDIVELPEIAR	4	3	1	O82326	N-Term(iTRAQ8plex)	0.717389	0.65206	0.763709	1.54771	1.10237	1.43575	0	2.429e-10
yGQDATNVGDEGGFAPNIQENk	8	3	1	P25696	Y1(iTRAQ8plex); K22(iTRAQ8plex)	0.830926	1.07354	0.899444	1.02746	1.15546	1.10523	0	1.036e-15
lDHLVNNAGMTQISmFENIEDITR	8	1	1	P0DKC6	N-Term(iTRAQ8plex); M15(Oxidation)	0.92088	0.942736	0.918522	1.03285	1.03917	1.10824	0	2.111e-17
dYVSGFPTESDFDFTTTTVELR	1	2	1	Q39172	N-Term(iTRAQ8plex)	1.03352	0.843774	1.05845	1.06892	1.21667	0.861395	0	2.047e-11
aGGIGVGGGIGGGHGVVGGVIDPHP	4	2	1	O23018	N-Term(iTRAQ8plex)	0.837744	0.627586	0.732121	1.30483	1.36873	1.26372	0	3.429e-15
NLRPFLIAGNNPQGQEWLQGR	18	1	1	P15456								0	1.684e-11
nIDGYESSGGGGGASLSDLSAEQLAk	1	5	1	A0SVJ6	N-Term(iTRAQ8plex); K26(iTRAQ8plex)	0.91186	0.88834	0.895619	0.98641	1.27241	1.16902	0	3.223e-10
dTLEVDAALIATGR	3	2	2	A8MS68;F4JLP5	N-Term(iTRAQ8plex)							0	1.501e-11
tVPAAVPAIVFLSGGQSEEEATR	3	3	2	Q9SJQ9;Q9LF98	N-Term(iTRAQ8plex)							0	3.806e-14
vDLNVPLDDNSNITDDTR	2	2	1	Q9SAJ4	N-Term(iTRAQ8plex)	1.05336	1.12318	1.06049	0.910774	0.951273	0.875738	0	4.689e-14
gGGPSLDDEFDFEGPQQGYQLLQQccNELR	1	1	1	P15459	N-Term(iTRAQ8plex); C25(Carbamidomethyl); C26(Carbamidomethyl)	0.79991	0.586929	0.695533	1.29963	1.6286	1.26952	0	1.128e-13
gPTSDGDLGVcISAPGGAVAPVPTWTLQR	2	1	1	F4JVN6	N-Term(iTRAQ8plex); C11(Carbamidomethyl)	1.05365	0.907205	1.0004	1.04188	0.976089	1.05629	0	3.771e-16
fADELIANAAYIGTPGk	10	4	3	Q8W4G8;Q9LF98;Q9SJQ9	N-Term(iTRAQ8plex); K17(iTRAQ8plex)							0	1.356e-13
acWALGcASTDVIAAIDR	2	1	1	Q84WS0	N-Term(iTRAQ8plex); C2(Carbamidomethyl); C7(Carbamidomethyl)	1.30155	1.14216	1.26156	0.701073	0.721855	0.717413	0	7.696e-13
dTHGYVGADLAALcTEAALQcIR	1	3	2	P54609;Q9SCN8	N-Term(iTRAQ8plex); C14(Carbamidomethyl); C21(Carbamidomethyl)							0	1.622e-16
qAFEDNSLAGAIGLGGSGGTSLISSAFR	1	2	1	Q9FJZ7	N-Term(iTRAQ8plex)	0.710489	0.924337	0.766317	1.23581	1.20806	1.37194	0	1.331e-15
iPTLAIHLDR	2	2	1	Q8LF32	N-Term(iTRAQ8plex)	0.943514	1.01915	1.00185	0.970831	1.14812	0.971256	0	6.613e-08
gATVEQTVPAATVTTEFVGGQVVGQHVEPR	5	1	1	Q9LJ95	N-Term(iTRAQ8plex)	0.86375	0.994871	0.966388	1.13905	1.13613	0.963514	0	7.696e-19
aGDSTPEELANATQVQGDYLPIVR	3	3	1	A8MQA1	N-Term(iTRAQ8plex)	0.870334	0.900689	0.893465	1.32042	1.2125	0.947207	0	6.009e-13
sFYGSGGDYSMFAGk	6	1	1	Q9SK39	N-Term(iTRAQ8plex); K15(iTRAQ8plex)	0.637108	0.70357	0.639133	1.37383	1.63693	1.34198	0	1.069e-15
tNLNPSEVGDIVVGTVLAPGSQR	6	1	1	Q56WD9	N-Term(iTRAQ8plex)	0.983947	0.985758	0.993347	1.10568	1.06107	0.961834	0	2.138e-17
aADQGLVILQSPTVGYFR	2	2	1	Q9SSR9	N-Term(iTRAQ8plex)	0.928451	0.962795	0.843653	1.08741	1.19662	1.07914	0	8.995e-17
gQcLNDPIcSLYINR	19	4	1	B9DGU8	N-Term(iTRAQ8plex); C3(Carbamidomethyl); C9(Carbamidomethyl)	1.21168	0.940899	1.22125	0.883447	0.919421	0.831706	0	3.468e-11
iAEcLVGDETGIIIFTAR	1	3	1	Q93W05	N-Term(iTRAQ8plex); C4(Carbamidomethyl)	1.10858	0.906082	1.18867	0.929189	0.831509	1.03169	0	2.13e-12
sGFEPYVVSHNLLVGHAEAVDAFR	9	1	1	Q9LIF9	N-Term(iTRAQ8plex)	1.00638	1.0626	1.05319	0.987135	1.04367	0.914656	0	5.444e-20
iVMELYADTTPETAENFR	8	1	1	Q38900	N-Term(iTRAQ8plex)	0.700081	0.792866	0.739021	1.23832	1.4335	1.26077	0	1.548e-13
sLVANEEFQHILR	2	2	1	P34788	N-Term(Acetyl)							0	1.021e-07
vDIDEGGISNTISk	1	1	1	O64764	N-Term(iTRAQ8plex); K14(iTRAQ8plex)	0.717789	0.855129	0.789221	1.25756	1.42866	1.18788	0	4.894e-12
sEVVGYMGDDNLAk	6	1	1	Q9ZP06	N-Term(iTRAQ8plex); K14(iTRAQ8plex)	0.76123	0.746074	0.680597	1.34054	1.5133	1.18069	0	1.397e-11
tLAAcDVAYPTc	3	1	1	Q9FF40	N-Term(iTRAQ8plex); C5(Carbamidomethyl); C12(Carbamidomethyl)	1.1707	0.890356	1.14661	0.945336	0.904446	0.93791	0	4.768e-08
yGAGIGPGVYDIHSPR	6	4	1	O50008	Y1(iTRAQ8plex)	1.0061	1.16943	1.00315	0.949744	0.911828	0.962424	0	3.164e-13
aLETAFAQYGDVIDSk	10	4	1	Q03250	N-Term(iTRAQ8plex); K16(iTRAQ8plex)	0.890648	0.948286	0.970488	1.05325	1.23723	1.00161	0	7.513e-16
vVDLQEELDIDVLVHGEPER	1	1	1	O50008	N-Term(iTRAQ8plex)	1.0261	0.950986	0.761551	1.11118	1.162	1.10661	0	8.682e-15
sYSPVDNVTAQNYPNMLVTAGLNDPR	3	1	1	Q9SX53	N-Term(iTRAQ8plex)	0.795395	0.811448	0.816704	1.14128	1.20966	1.27454	0	1.855e-13
gLPEGYSGNEDQTTGIR	8	2	1	Q9M042	N-Term(iTRAQ8plex)	1.04179	1.04195	1.09574	0.9325	1.02003	0.839844	0	5.798e-10
tVVEFDEDDASNPIGPIQk	5	1	1	P15460	N-Term(iTRAQ8plex); K19(iTRAQ8plex)	0.611728	0.673994	0.718624	1.41056	1.47914	1.35741	0	5.265e-14
iQVVDDNGQSVFNEQVGQGQIIVIPQGFAVSk	6	1	1	Q9ZWA9	N-Term(iTRAQ8plex); K32(iTRAQ8plex)	1.01575	1.03144	1.06837	0.965914	1.08774	0.827181	0	1.186e-15
aNTFVAEVMSLDPR	2	1	1	O82399	N-Term(iTRAQ8plex)	1.10642	1.03724	1.08584	0.843565	0.949938	0.960979	0	1.608e-12
aMALNMGMLASYDQSAEYMR	1	1	1	Q9C5M0	N-Term(iTRAQ8plex)	1.07209	1.04494	1.0977	0.877458	0.853812	1.05	0	2.283e-13
vSHVGAVGGGGGGEEk	12	3	1	Q9SIN3	N-Term(iTRAQ8plex); K16(iTRAQ8plex)	0.788759	0.841174	0.771397	1.15926	1.44807	1.09931	0	6.266e-16
sINPDEAVAYGAAVQGAILSGEGNEk	2	2	1	P22953	N-Term(iTRAQ8plex); K26(iTRAQ8plex)	0.915085	0.905809	0.927775	1.00221	1.19608	1.16179	0	1.343e-13
gLAVDIIETEMQk	12	1	1	Q941A4	N-Term(iTRAQ8plex); K13(iTRAQ8plex)	1.22834	1.18622	1.25669	0.759702	0.800503	0.641875	0	5.309e-13
YNmNANEILYcTGGQGR	1	2	1	Q96318	M3(Oxidation); C11(Carbamidomethyl)							0	8.738e-08
fAQAQNcLLPMGVTSENVAQR	3	1	1	Q56WD9	N-Term(iTRAQ8plex); C7(Carbamidomethyl)	0.8439	0.700327	0.692269	1.11614	1.19256	1.70727	0	5.851e-16
iTSGSVVLLP	2	2	1	Q9FKG8	N-Term(iTRAQ8plex)	0.842032	0.867084	1	1.06656	1.03794	1.24393	0	7.724e-06
FVTSLAADMDDHILk	2	1	1	Q39132	K15(iTRAQ8plex)	0.594318	0.875571	0.516151	0.689885	2.73289	0.852231	0	8.45e-10
gAFESMGAGLAMSPGDIAFk	1	4	1	F4JK17	N-Term(iTRAQ8plex); K20(iTRAQ8plex)	0.707893	1.12734	1.65742	0.856303	0.833306	0.804521	0	1.709e-15
eLFVAAEGMYTGQFLYcGk	4	2	2	Q42064;P46286	N-Term(iTRAQ8plex); C17(Carbamidomethyl); K19(iTRAQ8plex)							0	6.314e-11
gGIMFWADSIGSk	2	1	1	Q9ZPI5	N-Term(iTRAQ8plex); K13(iTRAQ8plex)	0.923523	1.18653	0.948845	0.979399	1.10912	0.916976	0	7.561e-11
lFEPIYDQTEGADGYVSVEVSPR	3	1	1	Q9LYR4	N-Term(iTRAQ8plex)	0.875602	0.90976	0.83148	1.01922	1.20077	1.2873	0	2.425e-12
lVPLLTEAGAIAGk	5	2	1	Q9FNE2	N-Term(iTRAQ8plex); K14(iTRAQ8plex)	0.759593	0.683517	0.755341	1.32571	1.45134	1.31159	0	1.828e-13
lAATADVSVLVIGADQSIEAESR	1	1	1	Q9FLG1	N-Term(iTRAQ8plex)	1.55578	0.817453	1.11832	0.98208	0.733229	0.702518	0	2.591e-14
iVDTLIDEQPLAIYATDk	6	1	1	Q9FM65	N-Term(iTRAQ8plex); K18(iTRAQ8plex)	0.961204	0.861868	0.87898	1.11344	1.21426	1.14396	0	9.262e-12
dGFVMGEGAGVLVMESLEHAMk	5	2	1	P52410	N-Term(iTRAQ8plex); K22(iTRAQ8plex)	0.933834	1.02136	1.0109	0.964702	1.09075	1.0072	0	7.613e-11
aEATDVANAVLDGSDAILLGAETLR	2	5	2	Q9LF93;Q9SJQ0	N-Term(iTRAQ8plex)							0	1.94e-13
NIFNGFGPEVIAQALk	6	2	1	P15455	K16(iTRAQ8plex)	0.675327	0.850695	0.44928	0.971161	2.60447	0.674161	0	1.389e-08
iNVETAQQLQNQQDNR	82	1	1	P15456	N-Term(iTRAQ8plex)	0.800692	0.761182	0.79477	1.23788	1.40777	1.2853	0	1.351e-14
fWEPTYEDcLNLIAR	2	1	1	P20115	N-Term(iTRAQ8plex); C9(Carbamidomethyl)	1.21674	1.18801	1.32201	0.715971	0.763729	0.674803	0	1.135e-10
iVPASGIEDGWMGLDIGPDSIk	3	1	1	Q9LD57	N-Term(iTRAQ8plex); K22(iTRAQ8plex)	1.07984	0.977509	1.1298	0.998733	0.974572	0.943955	0	1.257e-13
gSIMGALGNMTGAIk	9	1	1	Q9LF88	N-Term(iTRAQ8plex); K15(iTRAQ8plex)	0.560374	0.605487	0.621961	1.48301	1.80315	1.31034	0	1.49e-13
dVTELIGNTPLVYLNNVAEGcVGR	1	2	1	P47998	N-Term(iTRAQ8plex); C21(Carbamidomethyl)	1.09244	1.28284	1.30528	0.736298	0.807339	0.685642	0	1.233e-14
fIGLNAVADAVEYLHSGk	3	3	1	Q9FX95	N-Term(iTRAQ8plex); K18(iTRAQ8plex)	1.02101	1.16074	0.990827	0.986877	0.840671	0.946766	0	1.411e-11
vPAMFVLGDSLVDAGNNNFLQTVAR	2	1	1	Q9FVV1	N-Term(iTRAQ8plex)	1.06119	0.876757	0.999666	1.06235	1.01542	1.04294	0	6.214e-11
aLSPATLLAELNTIGGk	3	2	1	B3H778	N-Term(iTRAQ8plex); K17(iTRAQ8plex)	1.24991	1.06746	1.04519	0.836956	0.929118	0.812971	0	1.379e-10
iGHGEGAAGVGEAALFR	7	6	1	F4I9U2	N-Term(iTRAQ8plex)	1.0854	1.11325	1.08578	0.847497	0.925306	0.835697	0	6.615e-16
lIGSPPGYVGYTEGGQLTEAVR	2	3	1	Q9FI56	N-Term(iTRAQ8plex)	1.02365	1.10454	0.901438	0.998459	1.01874	0.999626	0	2.436e-12
sINPDEAVAYGAAVQAAILSGEGNEk	4	4	3	P22954;O65719;Q9LHA8	N-Term(iTRAQ8plex); K26(iTRAQ8plex)							0	6.406e-14
gILGYTEDDVVSTDFVGDNR	16	6	2	P25858;Q9FX54	N-Term(iTRAQ8plex)							0	2e-15
aAVEEGIVPGGGVALLYASk	2	2	1	F4IVR2	N-Term(iTRAQ8plex); K20(iTRAQ8plex)	0.923591	0.815907	0.902426	1.09675	1.21127	1.17809	0	1.233e-10
vTSVNSYTLPILEYVR	204	2	1	Q96318	N-Term(iTRAQ8plex)	0.896033	0.842975	0.89756	1.26301	1.01665	1.29098	0	5.247e-15
qFSGFVSDDSIGEQAAALDSSLk	2	1	1	Q9SHG8	N-Term(iTRAQ8plex); K23(iTRAQ8plex)	1.13134	1.17226	1.11532	0.890809	0.81419	0.836946	0	1.522e-13
gMQSTIYVEMAPGVR	3	1	1	Q93Z70	N-Term(iTRAQ8plex)	0.90005	0.869708	0.844237	1.17365	1.07058	1.29101	0	1.749e-11
yNMNANEILYcTGGQGR	75	2	1	Q96318	N-Term(iTRAQ8plex); Y1(iTRAQ8plex); C11(Carbamidomethyl)	1.07246	0.868221	1.23282	1.0512	0.711879	1.00052	0	8.683e-16
gAAHYAGVAAEk	12	1	1	Q9SIN3	N-Term(iTRAQ8plex); K12(iTRAQ8plex)	0.839157	0.814912	0.843689	1.15877	1.33845	1.179	0	3.823e-13
sEAGQIEYWDHNHPQLR	139	2	1	Q96318	N-Term(iTRAQ8plex)	1.04729	1.03209	1.02644	0.907819	1.09764	0.897001	0	3.771e-13
lLIDNVEELLPIVYTPTVGEAcQk	2	1	1	O82191	N-Term(iTRAQ8plex); C22(Carbamidomethyl); K24(iTRAQ8plex)	1.14571	1.11463	1.21401	0.79027	0.929083	0.747739	0	3.439e-15
dDADFLVDALDYSISR	2	1	1	Q940M2	N-Term(iTRAQ8plex)	1.08792	0.979858	1.12484	0.875257	1.03929	0.884154	0	1.048e-12
vVGQNQAVNAVSEAILR	2	1	1	P42730	N-Term(iTRAQ8plex)	0.991249	0.95982	0.910634	1.07619	0.967143	1.16971	0	1.6e-11
nPRPFYLAGNNPQGQVWLQGR	41	1	1	P15455	N-Term(iTRAQ8plex)	1.24136	0.621807	1.29987	0.985182	0.857271	1.00453	0	3.128e-09
lIGccNELNAGYAADGYAR	2	1	1	Q9FFT4	N-Term(iTRAQ8plex); C4(Carbamidomethyl); C5(Carbamidomethyl)	1.06233	1.06129	1.04946	1.05096	0.864803	0.915317	0	2.393e-09
pFyLAGNNPQGQVWLQGR	20	2	1	P15455	N-Term(iTRAQ8plex); Y3(iTRAQ8plex)	0.930521	0.922002	1.32468	1.23582	0.567301	1.0418	0	1.972e-14
tYDIVSAFQSYGEFVSGSISDEQR	1	1	1	Q9LIR4	N-Term(iTRAQ8plex)	1.11997	1.06749	1.07987	0.884591	0.872769	0.961731	0	7.334e-14
hSLLGASGEISDFQEILR	1	1	1	Q7DLR9	N-Term(iTRAQ8plex)	0.9131	1.01584	0.901179	1.10967	0.997814	1.16952	0	1.807e-16
NPRPFYLAGNNPQGQVWLQGR	5	1	1	P15455								0	1.432e-10
dGVFMYFEDNAGVIVNPk	10	3	1	F4J3P1	N-Term(iTRAQ8plex); K18(iTRAQ8plex)	0.703599	0.734102	0.721534	1.30695	1.46664	1.32154	0	1.532e-09
vTGMLLEMDQTEVLHLLESPEALk	2	3	2	P42731;Q9FXA2	N-Term(iTRAQ8plex); K24(iTRAQ8plex)							0	2.097e-13
dMFNNENILGLk	2	1	1	Q93Y22	N-Term(iTRAQ8plex); K12(iTRAQ8plex)	0.982483	1.00475	1.02949	0.973321	1.02695	1.02085	0	4.026e-10
lHDVNELADHAASAFETVR	5	1	1	Q9FK91	N-Term(iTRAQ8plex)	1.00615	1.02797	1.01712	0.920906	0.943544	1.07319	0	1.419e-13
vSGPVVVADGMAGAAMYELVR	2	1	1	O23654	N-Term(iTRAQ8plex)	1.02042	0.952013	0.970422	1.1768	1.03035	0.927269	0	5.113e-12
lFEEIAGNEFEPWER	9	1	1	Q9FK91	N-Term(iTRAQ8plex)	1.12916	1.16424	1.17775	0.803883	0.804357	0.8225	0	3.889e-12
hEDNIQPTHTTTTVQDDAWR	10	3	1	Q9ZRT9	N-Term(iTRAQ8plex)	0.778204	0.74551	0.673486	1.42448	1.55464	1.16557	0	1.962e-16
qIIDLGNTGLLPLEIR	2	1	1	Q93WN0	N-Term(iTRAQ8plex)	0.968692	0.937141	0.929289	1.09451	1.14138	1.01758	0	6.46e-12
dQISVAFGDGYGNQIYAPR	3	3	1	Q680D1	N-Term(iTRAQ8plex)	0.837424	0.834088	0.858117	1.27627	1.2391	1.08661	0	4.739e-12
lVVETTANQDPLVTk	8	1	1	Q9LYK8	N-Term(iTRAQ8plex); K15(iTRAQ8plex)	1.07601	1.13314	1.18655	0.83593	0.860964	0.797461	0	1.544e-12
fEAGQMEVWDHMSPELR	12	1	1	Q9ZWA9	N-Term(iTRAQ8plex)	0.915916	0.955148	0.935229	1.15582	1.12894	1.03131	0	1.376e-15
gLDVDALFISHIQVNQAAk	5	2	2	P51413;Q93VI3	N-Term(iTRAQ8plex); K19(iTRAQ8plex)							0	7.328e-13
gGEIGDVWDDGAYDGVR	11	1	1	O49326	N-Term(iTRAQ8plex)	0.917516	0.939982	0.941375	1.06005	1.22151	1.01818	0	2.85e-14
lGANVGSAQGPTGLGk	1	2	1	Q8HT11	N-Term(iTRAQ8plex); K16(iTRAQ8plex)	1.16487	1.15027	1.2062	0.933729	0.82654	0.668833	0	2.112e-12
vLTPAEIDDYLAEVE	3	2	1	O23708	N-Term(iTRAQ8plex)	1.04936	0.918519	1.08398	0.941207	0.97264	0.998047	0	4.851e-06
vVLDMTTLTIMR	3	3	1	Q9MAK9	N-Term(iTRAQ8plex)	1.08203	1.04489	1.0544	0.903112	0.872343	0.995886	0	1.835e-08
tNVEVDQIESWVk	11	2	1	Q9XI01	N-Term(iTRAQ8plex); K13(iTRAQ8plex)	0.999655	1.05171	1.08086	0.919616	0.989327	0.958964	0	9.164e-13
gcIVSPDLSVLNLVIVk	6	4	2	O48549;P51430	N-Term(iTRAQ8plex); C2(Carbamidomethyl); K17(iTRAQ8plex)							0	2.509e-09
iINEPTAAAIAYGLDk	9	10	7	P22954;O65719;P22953;Q9LKR3;Q39043;Q9LHA8;Q9S9N1	N-Term(iTRAQ8plex); K16(iTRAQ8plex)							0	9.141e-17
gVLQGNAMVLPk	73	2	1	Q96318	N-Term(iTRAQ8plex); K12(iTRAQ8plex)	0.795565	0.73987	0.830704	1.22762	1.43145	1.15814	0	2.172e-11
nYELPDGQVITIGAER	8	8	2	Q96292;P53492	N-Term(iTRAQ8plex)							0	1.211e-09
fTSEDVMQNVD	2	1	1	P51414	N-Term(iTRAQ8plex)	0.993668	1.01482	0.838165	1.05663	1.0934	1.09024	0	3.768e-06
gFGFVNFNDEGAATAAISEMDGk	4	4	1	A8MSB9	N-Term(iTRAQ8plex); K23(iTRAQ8plex)	0.683215	0.667687	0.736705	1.35924	1.51449	1.30869	0	6.592e-16
tENNPYLGFIYTSFQER	4	4	3	O22832;Q9M879;Q9LF04	N-Term(iTRAQ8plex)							0	2.443e-14
vLPGVIALDEAIPVTV	2	1	1	Q9LD57	N-Term(iTRAQ8plex)	1.1575	1.30837	1.33745	0.572533	0.796498	0.619023	0	1.856e-06
eVTIVNTGTVLQVGDGIAR	1	1	1	P56757	N-Term(iTRAQ8plex)	0.984812	1.10245	1.0001	0.953503	1.09731	0.911517	0	2.843e-14
qFWEFDPNLGTPEDLAAVEEAR	1	1	1	P38605	N-Term(iTRAQ8plex)	0.848937	0.843093	0.876337	1.09041	1.24305	1.25752	0	6.713e-13
vDVDELNTVAEEFk	5	2	1	Q42403	N-Term(iTRAQ8plex); K14(iTRAQ8plex)	1.10206	1.12106	1.16544	0.842645	0.900038	0.777515	0	1.517e-13
vYALDAVFDNPEDVPEDVk	6	1	1	Q9SLA8	N-Term(iTRAQ8plex); K19(iTRAQ8plex)	1.13765	1.2467	1.10103	0.819923	0.840808	0.738154	0	4.262e-11
dAPALVDLATGQEILATGIk	7	4	1	P83483	N-Term(iTRAQ8plex); K20(iTRAQ8plex)	1.0938	1.0804	1.12793	0.829917	0.989482	0.863092	0	1.054e-12
lVAGLLGVESGQDAVIR	4	4	2	Q9LZJ2;Q9C7Z0	N-Term(iTRAQ8plex)							0	5.404e-11
aPDVSLSYAADTAk	4	2	1	Q570U4	N-Term(iTRAQ8plex); K14(iTRAQ8plex)	0.631041	0.716516	0.730013	1.29002	1.46613	1.28578	0	2.735e-11
lSGSEFDSFMAIAEk	7	2	1	Q9XI01	N-Term(iTRAQ8plex); K15(iTRAQ8plex)	1.12632	1.06322	1.17941	0.938984	0.883857	0.778633	0	2.111e-15
tITLEVESSDTIDNVk	20	41	3	P59232;Q8RUC6;A6XI99	N-Term(iTRAQ8plex); K16(iTRAQ8plex)							0	5.312e-14
rTFLAGEENLLSNLNPAATR	10	1	1	Q9LUJ7	N-Term(iTRAQ8plex)	1.14148	0.88255	1.0685	0.88479	0.95174	1.03358	0	2.176e-16
aEADEEVLQILELYR	3	1	1	Q9M1R2	N-Term(iTRAQ8plex)	1.18797	1.0206	1.03171	0.85958	1.09211	0.911325	0	1.386e-09
vNQIGTVTESIQAALDSk	5	1	1	Q9C9C4	N-Term(iTRAQ8plex); K18(iTRAQ8plex)	1.16459	1.03012	1.13636	0.868664	0.856096	0.910037	0	1.141e-11
TGEAMGTMGDk	3	2	1	Q96270	K11(iTRAQ8plex)	0.722827	0.766152	0.771002	0.82929	1.93229	0.939617	0	1.311e-07
eSQSVGAAGELYk	2	2	1	Q8RU07	N-Term(iTRAQ8plex); K13(iTRAQ8plex)	1.14416	1.16932	1.15773	0.872561	0.894018	0.709651	0	2.517e-11
eLIGPAMYFGLMGDGQPIGR	7	2	2	O22666;Q9SRT9	N-Term(iTRAQ8plex)							0	1.551e-09
lVGVSEETTTGVk	4	11	2	O23255;Q9LK36	N-Term(iTRAQ8plex); K13(iTRAQ8plex)							0	1.636e-13
gLLYLGMGVSGGEEGAR	2	2	2	Q9SH69;Q9FFR3	N-Term(iTRAQ8plex)							0	1.468e-09
gFGFVNFENADDAAR	1	1	1	P42731	N-Term(iTRAQ8plex)	0.951211	0.935968	0.987391	1.02913	1.15847	1.03131	0	4.601e-14
tVGAGVIGTILE	3	3	1	P17745	N-Term(iTRAQ8plex)	1.19577	0.868672	1.01893	1.02618	0.948693	1.11812	0	3.727e-07
eYGGDVGFSYcAPR	21	2	1	Q42330	N-Term(iTRAQ8plex); C11(Carbamidomethyl)	0.797984	0.642625	0.852842	1.24532	1.3691	1.24748	0	1.857e-12
mDAIDSVVDPLR	1	1	1	P0DI75	N-Term(Acetyl)							0	3.207e-08
vDkGTVELAGTDGETTTQGLDGLGDR	1	1	1	Q9LF98	N-Term(iTRAQ8plex); K3(iTRAQ8plex)	1.23163	0.965944	1.35306	0.798393	0.831712	0.735911	0	7.016e-20
yRVENLYEGPLDDQYANAIR	4	1	1	Q9ASR1	N-Term(iTRAQ8plex)	0.893959	0.886335	0.891684	0.944002	1.0599	1.40737	0	3.085e-17
vVDLADIVANNWk	5	5	2	P25856;Q9LPW0	N-Term(iTRAQ8plex); K13(iTRAQ8plex)							0	5.863e-14
tVVEFDEDDASNPMGPR	2	2	1	P15458	N-Term(iTRAQ8plex)	0.791896	0.756934	0.73665	1.3355	1.3468	1.26543	0	4.088e-13
nAAYMDGVFAAADGTPFVR	1	3	2	Q8L742;Q8H7E1	N-Term(iTRAQ8plex)							0	2.717e-16
tAVAQDDISGDGTTSTVIFIGELMk	1	2	2	Q8L7N0;Q9M888	N-Term(iTRAQ8plex); K25(iTRAQ8plex)							0	5.293e-13
aGSYLSETGEAIk	29	2	1	Q9LW12	N-Term(iTRAQ8plex); K13(iTRAQ8plex)	0.670044	0.73013	0.737818	1.34831	1.51867	1.29298	0	1.712e-12
vASILYLDQPVGTGFSYSR	2	1	1	Q9C7D6	N-Term(iTRAQ8plex)	1.13084	1.09527	1.11823	0.867789	0.762715	0.959896	0	1.444e-15
nAQNAILSGcSAGALAAILHcDTFR	1	2	1	Q940J8	N-Term(iTRAQ8plex); C10(Carbamidomethyl); C21(Carbamidomethyl)	1.22396	0.850093	1.02533	0.968701	0.918292	1.02296	0	3.503e-17
gWDEGVIGMQIGEVAR	4	1	1	Q8LGG0	N-Term(iTRAQ8plex)	0.724155	0.784912	0.811343	1.29376	1.29825	1.22126	0	8.216e-12
eVLSTSFNVPEELLGR	38	1	1	Q9LUJ7	N-Term(iTRAQ8plex)	0.706466	0.730672	0.758366	1.29314	1.43451	1.29105	0	2.436e-12
aLLDEMAVVATEEYR	2	3	1	B9DGT6	N-Term(iTRAQ8plex)	1.07202	1.03815	0.910009	0.908247	1.07018	1.0402	0	3.979e-11
iQSLcPTISGNVccTETQFDTLR	1	3	1	F4JTN0	N-Term(iTRAQ8plex); C5(Carbamidomethyl); C13(Carbamidomethyl); C14(Carbamidomethyl)	0.808082	0.76203	1.04488	1.33568	0.975934	1.24375	0	2.148e-11
sINPDEAVAYGAAVQAAILTGEGSEk	2	1	1	Q9S9N1	N-Term(iTRAQ8plex); K26(iTRAQ8plex)	1.16515	1.09687	1.11119	0.912969	0.868558	0.789465	0	5.982e-14
fNLNVQAVNVLLDNVR	1	2	2	Q0WLB5;Q0WNJ6	N-Term(iTRAQ8plex)							0	8.302e-12
aEQLITDVLQEAEAGNTAGSGGGGGR	2	1	1	O82762	N-Term(iTRAQ8plex)	1.39212	0.575477	0.754719	0.818977	0.955473	1.2087	0	4.813e-16
aILDGVDVISLSLGGSSR	5	1	1	Q84WS0	N-Term(iTRAQ8plex)	0.817968	1.1789	0.874123	0.940382	1.16416	1.01015	0	3.39e-13
mFVLDEADEMLSR	13	10	2	P41376;P41377	N-Term(iTRAQ8plex)							0	9.468e-09
aVAEEMGIGFLGIGFQPk	4	2	1	P46309	N-Term(iTRAQ8plex); K18(iTRAQ8plex)	1.00461	1.09212	1.09422	0.945211	0.940717	0.901498	0	1.752e-08
FVIEPQGLFLPTFLNAGk	2	1	1	P15456	K18(iTRAQ8plex)	0.388243	0.550307	0.429612	0.650285	3.88587	0.558126	0	3.354e-07
iSGLIYEETR	3	2	1	P59259	N-Term(iTRAQ8plex)	0.956766	1.22158	0.977551	1.0292	0.790941	0.949459	0	5.79e-08
aAAIHYGTGAIAGFFSNDAVTVGDLVVk	7	2	1	O65390	N-Term(iTRAQ8plex); K28(iTRAQ8plex)	0.979765	1.40797	0.94853	0.886052	0.99633	0.786954	0	2.502e-14
aLDLGPQGIMFPMIESR	1	3	1	O22581	N-Term(iTRAQ8plex)	1.06904	1.14005	1.20631	0.726343	1.03714	0.781103	0	1.41e-13
lENVLVVNDAETEFNFGDk	1	4	1	F4JQH3	N-Term(iTRAQ8plex); K19(iTRAQ8plex)	0.945886	0.849589	0.923094	1.02378	1.2207	1.15475	0	1.726e-11
vLFSDVSAYEVDLGTDAR	3	2	1	O80504	N-Term(iTRAQ8plex)	0.935161	0.874683	1.1566	0.969505	1.05422	1.02205	0	8.584e-12
yVPFNAAPGSTESYSLDEIVYR	2	1	1	Q9S7B5	N-Term(iTRAQ8plex)	0.830925	0.878133	0.730022	1.07099	1.35497	1.32052	0	5.111e-12
yNmNANEILYcTGGQGR	30	2	1	Q96318	Y1(iTRAQ8plex); N-Term(iTRAQ8plex); M3(Oxidation); C11(Carbamidomethyl)	1.00788	0.984849	1.13092	1.05055	0.764736	0.988138	0	1.31e-10
sTGISLYYEMTDESLk	5	1	1	Q9ASR1	N-Term(iTRAQ8plex); K16(iTRAQ8plex)	0.89647	1.0093	0.884743	1.16134	1.19324	1.11473	0	1.56e-10
tSLYGDDVVIVAAHR	7	3	1	Q56WD9	N-Term(iTRAQ8plex)	0.897683	0.806918	0.89568	1.30514	1.14508	1.05668	0	8.814e-11
aGDIYWIPAGSVFYLHNTGLGQR	3	1	1	Q9SK09	N-Term(iTRAQ8plex)	0.588389	0.736648	0.621754	1.15691	2.01287	1.41477	0	2.947e-14
nLPLVGEVGFGADLVR	1	4	1	Q8LA49	N-Term(iTRAQ8plex)	1.15886	1.18366	1.25601	0.920097	0.611046	0.795969	0	2.015e-12
eLDFQYSPFSAQQSMQSR	2	5	1	F4I1G1	N-Term(iTRAQ8plex)	0.726394	0.733786	0.8571	1.24862	1.38677	1.27357	0	5.006e-12
qVEAHHFcGHINEDMR	8	1	1	Q9ZVY7	N-Term(iTRAQ8plex); C8(Carbamidomethyl)	1.18523	1.2841	1.17718	0.779931	0.706369	0.744398	0	2.475e-14
tVVEFEEDDASNPVGPR	7	1	1	P15459	N-Term(iTRAQ8plex)	0.659708	0.67399	0.543587	1.44543	1.50674	1.3912	0	4.935e-11
aLADGGVTDEVMAEFDk	4	2	1	Q9C9P4	N-Term(iTRAQ8plex); K17(iTRAQ8plex)	0.997276	1.03139	1.08611	1.0049	0.933856	1.00577	0	2.029e-11
sGDDVAVELVk	3	2	1	Q9SR67	N-Term(iTRAQ8plex); K11(iTRAQ8plex)	0.639432	0.764097	0.710191	1.29427	1.58932	1.28501	0	1.222e-09
iDVLVNcAAEQHEVSIEDIDEAR	1	1	1	Q9MA93	N-Term(iTRAQ8plex); C7(Carbamidomethyl)	0.929349	1.04747	1.02871	1.08239	0.944923	1.04063	0	8.257e-15
gLGLTSPFSGEEGLTEMVESPEMGk	1	1	1	Q9S7T8	N-Term(iTRAQ8plex); K25(iTRAQ8plex)	0.949742	1.0705	1.16085	0.906999	1.0932	0.850262	0	7.806e-11
yHTVFDFGNEQVGFAEAA	4	4	1	O65390	N-Term(iTRAQ8plex); Y1(iTRAQ8plex)	0.857723	0.930425	1.11422	1.25576	1.0056	0.965564	0	1.925e-05
NRPQFLVGSNSLLR	5	1	1	Q9SK09								0	7.981e-11
vVPGFLGGSADLASSNMTLLk	5	2	1	F4JBY2	N-Term(iTRAQ8plex); K21(iTRAQ8plex)	1.07937	1.16557	1.03352	0.86471	0.891571	0.887287	0	2.713e-10
tNENAQVNTLAGR	42	1	1	P15456	N-Term(iTRAQ8plex)	1.11833	1.0956	1.14077	0.881626	0.754099	0.879355	0	3.038e-08
vNQIGSVTESIEAVk	6	2	1	P25696	N-Term(iTRAQ8plex); K15(iTRAQ8plex)	0.96938	1.08815	0.986191	0.959651	1.03291	1.03079	0	1.549e-11
dVQVGPFPVASASGcAk	22	2	1	P0DKC6	N-Term(iTRAQ8plex); C15(Carbamidomethyl); K17(iTRAQ8plex)	1.0319	1.13167	1.08234	0.937161	0.963056	0.856587	0	3.333e-19
sISDLGAVNDSVYAITER	1	1	1	Q9XI37	N-Term(iTRAQ8plex)	1.13878	1.07757	0.882409	0.914105	1.03397	0.976984	0	1.255e-12
iEMELFADTTPNTAENFR	9	1	1	Q42406	N-Term(iTRAQ8plex)	0.641589	0.679944	0.695548	1.37846	1.60537	1.29137	0	1.34e-11
tLNLTSLSIAFGVDEETMR	2	1	1	Q9SK09	N-Term(iTRAQ8plex)	0.952201	0.725296	0.781299	1.22725	1.04466	1.40099	0	1.89e-11
sQGATGWLVNTGWSGGSYGVGNR	2	2	1	Q9T074	N-Term(iTRAQ8plex)	0.894196	0.89404	0.831786	1.21176	1.07691	1.19481	0	4.65e-16
ySGVDTLLEASPLQGATVk	40	1	1	O64586	Y1(iTRAQ8plex); K19(iTRAQ8plex)	0.87806	0.897736	0.840939	1.13383	1.24851	1.13536	0	6.225e-17
tIAEcLADELINAAk	3	2	2	Q9ZUT9;P51427	N-Term(iTRAQ8plex); C5(Carbamidomethyl); K15(iTRAQ8plex)							0	1.953e-17
eADQMTGQTFNDVGEIDDEEk	1	1	1	Q9LF88	N-Term(iTRAQ8plex); K21(iTRAQ8plex)	0.674416	0.607004	0.647086	1.3961	1.59567	1.40603	0	5.059e-13
iSPDPIFLTSEASSVGGFYAINR	1	2	2	Q0WLB5;Q0WNJ6	N-Term(iTRAQ8plex)							0	3.728e-12
qEEGVVIANLDADAHk	4	5	1	O22263	N-Term(iTRAQ8plex); K16(iTRAQ8plex)	0.906836	1.05642	0.992601	1.03497	1.08788	0.9848	0	8.501e-14
nSAVAGALTGAAMAMTTSER	6	1	1	Q0WMZ5	N-Term(iTRAQ8plex)	1.34125	0.985031	1.11897	0.838431	0.59776	0.732608	0	3.276e-18
vVVSDSLDDIVLNSGk	7	2	1	Q9XI01	N-Term(iTRAQ8plex); K16(iTRAQ8plex)	1.03691	1.09757	1.02784	0.872414	0.987064	0.891436	0	2.362e-16
VSVGDVFWIPR	1	1	1	Q9SK09								0	1.102e-05
gILAIDESNATcGk	6	1	1	Q9ZU52	N-Term(iTRAQ8plex); C12(Carbamidomethyl); K14(iTRAQ8plex)	1.1388	1.10464	1.20276	0.902791	0.840422	0.828078	0	2.472e-11
vIANNLLVQGIPLIS	3	2	1	Q9LZC5	N-Term(iTRAQ8plex)	0.88059	0.709825	0.954087	1.07608	0.928975	1.5195	0	1.997e-08
gNPTVEVDLITDDLYR	4	1	1	Q9C9C4	N-Term(iTRAQ8plex)	1.07088	1.02561	0.993279	0.832838	0.914651	1.13081	0	4.755e-15
fTVVxDTGSSNLWVPSSk	12	2	1	O65390	N-Term(iTRAQ8plex); X5(F); K18(iTRAQ8plex)	1.05623	1.20482	1.1298	0.878761	0.91885	0.802887	0	1.28e-13
rEDAAAITEEDLLQIPR	2	5	1	Q9LZC3	N-Term(iTRAQ8plex)	0.902427	0.919916	0.955687	1.14846	1.05299	1.12665	0	1.054e-13
aSPALMDLSTADEEDLYGR	2	1	1	Q9SEI4	N-Term(iTRAQ8plex)	0.911478	1.00185	0.92618	1.05305	1.07229	1.13137	0	2.17e-13
aLGVDILTGFGAVLGPQk	3	1	1	F4JLP5	N-Term(iTRAQ8plex); K18(iTRAQ8plex)	1.24229	1.34882	1.37506	0.668731	0.777796	0.523898	0	5.088e-09
nMITGTSQADcAVLIIDSTTGGFEAGISk	1	3	1	Q8GTY0	N-Term(iTRAQ8plex); C11(Carbamidomethyl); K29(iTRAQ8plex)	0.866575	0.951009	0.999585	1.10902	0.976501	1.20741	0	1.415e-16
wGTIDVVVNNAGITR	5	1	1	P33207	N-Term(iTRAQ8plex)	1.05672	1.16483	1.0425	1.02989	0.812912	0.961885	0	4.325e-11
aVDSAANVQPENVESVWNLR	1	3	1	Q9S850	N-Term(iTRAQ8plex)	0.793528	0.997499	0.871649	1.22228	1.12454	1.15591	0	3.877e-13
yFSGEGELIVNQDMR	63	2	1	P0DKC6	N-Term(iTRAQ8plex)	1.09251	1.02211	1.14192	0.931143	0.844633	0.927566	0	1.377e-15
eYGGNVGFSYcAPR	5	1	1	O22866	N-Term(iTRAQ8plex); C11(Carbamidomethyl)	0.868265	0.739657	0.825791	1.17809	1.31895	1.21675	0	7.61e-14
eSLTDDDAEL	1	3	1	Q9ZRT9	N-Term(iTRAQ8plex)	0.871202	0.912064	0.985318	1.09827	1.11011	1.14543	0	8.257e-06
gILAADESTGTIGk	3	7	3	Q9LF98;Q9SJQ9;Q8W4G8	N-Term(iTRAQ8plex); K14(iTRAQ8plex)							0	1.833e-15
yNVLMIADEVQSGLAR	2	1	1	Q9FNK4	N-Term(iTRAQ8plex)	1.0515	0.869191	0.913621	1.12032	0.887575	1.24179	0	2.026e-11
yNmNANEILYcTGGQGR	132	2	1	Q96318	N-Term(iTRAQ8plex); M3(Oxidation); C11(Carbamidomethyl)	0.955452	0.942044	0.954796	1.0875	1.06585	1.0329	0	2.972e-15
dDVELVAVNDPFITTEYMTYMFk	2	5	2	P25858;Q9FX54	N-Term(iTRAQ8plex); K23(iTRAQ8plex)							0	1.52e-12
fVADGVFYAELNEVLTR	3	4	3	Q9SIP7;Q9M339;Q9FJA6	N-Term(iTRAQ8plex)							0	5.902e-13
dGDWScASVPPAVADR	3	1	1	Q9LZC3	N-Term(iTRAQ8plex); C6(Carbamidomethyl)	1.12284	0.890147	1.13187	0.775558	0.992439	1.00476	0	4.107e-15
gGSTGYDNAVALPAGGR	1	2	2	P23321;Q9S841	N-Term(iTRAQ8plex)							0	2.342e-15
eDAAAITEEDLLQIPR	4	5	1	Q9LZC3	N-Term(iTRAQ8plex)	0.869801	0.886192	0.915006	1.16441	1.16093	1.02524	0	5.303e-13
aGIGPITQDWEPVVIR	2	2	2	Q9LXT3;Q9SJI8	N-Term(Acetyl)							0	8.25e-10
TNENAQVNTLAGR	7	1	1	P15456								0	5.36e-07
eGNFDLVGNNFPVFFVR	2	1	1	Q96528	N-Term(iTRAQ8plex)	0.684193	0.664357	0.70906	1.18322	1.58009	1.45173	0	3.858e-13
lDEIVVFDPLSHDQLR	4	1	1	P42730	N-Term(iTRAQ8plex)	0.982142	0.953517	0.937459	0.902953	0.970522	1.10744	0	3.281e-12
gVNPDEAVAMGAAIQGGILR	6	2	2	Q8GUM2;Q9LDZ0	N-Term(iTRAQ8plex)							0	1.41e-14
fTQANSEVSALLGR	4	4	1	P83483	N-Term(iTRAQ8plex)	1.03249	1.08617	0.984605	0.983273	0.753917	1.16853	0	9.06e-11
iDLQTAQQLQNQDDNRGNIVR	8	2	1	P15455	N-Term(iTRAQ8plex)	1.13847	0.645899	1.249	0.902315	0.900268	0.986788	0	1.782e-11
gTSDVEGVVTLTQDDSGPTTVNVR	2	1	1	O78310	N-Term(iTRAQ8plex)	0.906389	0.79054	0.852743	1.23738	1.18976	1.18426	0	1.843e-13
eGNFDLVGNNFPVFFIR	4	4	1	P25819	N-Term(iTRAQ8plex)	0.637838	0.645715	0.588118	1.26086	1.6147	1.48423	0	2.621e-13
nYLDAQYYGEIAIGTPPQk	21	3	2	O65390;Q8VYL3	N-Term(iTRAQ8plex); K19(iTRAQ8plex)							0	1.97e-13
lAYVALDYEQELETAk	17	1	1	P53492	N-Term(iTRAQ8plex); K16(iTRAQ8plex)	1.03794	1.17833	1.05349	0.869923	0.979394	0.802768	0	3.009e-10
gGIGVIQIDEAALR	7	2	1	O50008	N-Term(iTRAQ8plex)	1.02739	1.09069	1.02412	0.946229	0.936053	0.908608	0	5.317e-09
VNGVAPGPIWTPLIPASFNEEk	2	1	1	Q9FZ42	K22(iTRAQ8plex)	0.992951	1.07677	0.995522	1.01424	1.10941	0.863733	0	5.821e-07
dYTGSSVTAANFYAVLLGDQk	4	1	1	Q39044	N-Term(iTRAQ8plex); K21(iTRAQ8plex)	1.19642	1.19794	1.14173	0.775605	0.85132	0.629448	0	1.606e-10
vGYPVNTDALDALYEk	5	2	1	Q9SQI8	N-Term(iTRAQ8plex); K16(iTRAQ8plex)	1.02556	1.13469	1.11375	0.863295	0.955397	0.850627	0	3.282e-10
fTMGLFEEPLADLSFANQLGSk	1	1	1	Q8W112	N-Term(iTRAQ8plex); K22(iTRAQ8plex)	1.11233	1.25612	1.2143	0.805114	0.853606	0.692312	0	3.444e-14
TNANAQINTLAGR	11	2	1	P15455								0	6.612e-05
iTASVQQMIDMDk	5	2	1	F4JR37	N-Term(iTRAQ8plex); K13(iTRAQ8plex)	0.899475	0.861249	0.948313	1.2058	1.10466	1.17562	0	7.126e-13
VFHLAGNNQQGGFGGSQQQQEQk	9	2	1	Q96318	K23(iTRAQ8plex)	0.885453	0.850676	0.862874	1.2064	1.36541	0.999694	0	2.353e-11
fASEVAGVQDLGILGR	2	3	1	B9DFQ9	N-Term(iTRAQ8plex)	1.0129	1.01154	0.813973	1.05585	1.00482	1.17459	0	1.528e-11
gMTGLLWETSLLDPEEGIR	2	1	1	P20115	N-Term(iTRAQ8plex)	1.06399	1.04492	1.03091	0.882955	1.045	0.940243	0	3.549e-13
gVNPDEAVAYGAAVQGGILSGEGGDETk	2	3	2	Q9LKR3;Q39043	N-Term(iTRAQ8plex); K28(iTRAQ8plex)							0	1.41e-12
vELAGLVGSGPMGR	3	1	1	Q9C8P0	N-Term(iTRAQ8plex)	1.03605	1.07039	1.18491	0.888351	0.937716	0.96966	0	4.066e-10
vLNFAIDDSVLEER	4	1	1	Q9FK35	N-Term(iTRAQ8plex)	0.888655	0.685089	0.905358	1.22227	1.21066	1.20109	0	7.532e-10
lVAEVLLDEVAEk	7	2	1	Q9FPF0	N-Term(iTRAQ8plex); K13(iTRAQ8plex)	0.875171	0.816166	0.743914	1.25485	1.29859	1.2138	0	5.224e-13
vVIVDSGELPL	3	1	1	Q9SP02	N-Term(iTRAQ8plex)	1.16852	0.972118	0.995238	0.934694	0.93951	0.962508	0	4.225e-05
tGPFEFVGFTTSAHk	20	1	1	Q9SK09	N-Term(iTRAQ8plex); K15(iTRAQ8plex)	0.508416	0.562525	0.606121	1.64603	1.62318	1.47229	0	6.19e-15
LDHLVNNAGMTQISMFENIEDITR	2	1	1	P0DKC6								0	6.289e-11
FNTLETTLTHSSGPASYGR	2	2	1	P15455								0	7.345e-11
yGFNPEVGSVGMPVAETIR	4	1	1	Q75W54	N-Term(iTRAQ8plex)	0.992124	0.967693	0.972985	1.0464	1.02874	1.05956	0	4.861e-09
aLAENEGEGIAk	16	2	2	A8MS68;F4JLP5	N-Term(iTRAQ8plex); K12(iTRAQ8plex)							0	1.779e-12
eAYFTVVDGAGFDSNNVGPPSEITGNk	4	1	1	Q0WMZ5	N-Term(iTRAQ8plex); K27(iTRAQ8plex)	0.94891	1.11682	0.980651	0.96992	0.893386	0.954659	0	5.259e-13
tTGAEDAIAALAFk	4	1	1	Q9LIF8	N-Term(iTRAQ8plex); K14(iTRAQ8plex)	0.899783	1.03118	1.02526	1.00486	1.14691	1.01435	0	1.102e-13
eADVDGDGQINYEEFVk	4	14	2	P0DH98;P0DH95	N-Term(iTRAQ8plex); K17(iTRAQ8plex)							0	1.07e-10
aSQSYDSAGQVk	15	3	1	Q9ZRT9	N-Term(iTRAQ8plex); K12(iTRAQ8plex)	0.593482	0.79207	0.597564	1.39037	1.74999	1.28068	0	6.72e-09
qVVSLcQAPFLLDDPNVGMIFPADAIAR	2	1	1	Q9S7E9	N-Term(iTRAQ8plex); C6(Carbamidomethyl)	1.23102	1.08087	1.26148	0.966674	0.670371	0.61628	0	7.3e-17
eTVSQTDYEVDLITAFTk	2	1	1	P82281	N-Term(iTRAQ8plex); K18(iTRAQ8plex)	1.13162	1.06608	1.11619	0.890779	0.981334	0.791999	0	3.8e-12
iALTDNSIVEQALGk	5	1	1	P60040	N-Term(iTRAQ8plex); K15(iTRAQ8plex)	1.01737	1.08603	0.970169	0.957708	0.994347	0.940837	0	2.021e-15
kLVAGLLGVESGQDAVIR	3	4	2	Q9LZJ2;Q9C7Z0	N-Term(iTRAQ8plex); K1(iTRAQ8plex)							0	4.96e-13
lIVEPAEGGEQTTLEADVVLVSAGR	1	1	1	Q9M5K2	N-Term(iTRAQ8plex)	0.733396	0.996119	0.812201	1.33824	1.13135	1.19363	0	9.572e-14
vFEVSLADLQGDEDNAYR	5	1	1	Q9CAV0	N-Term(iTRAQ8plex)	0.944175	1.04525	0.953649	1.00492	1.12957	1.07139	0	4.585e-10
dVIGWLPEQLDTAEESLMk	4	1	1	Q9FWY8	N-Term(iTRAQ8plex); K19(iTRAQ8plex)	0.745797	0.627847	0.72036	1.35181	1.55874	1.21773	0	1.717e-10
sEIEYYAMLAk	4	3	2	Q9C8F7;Q8VZ19	N-Term(iTRAQ8plex); K11(iTRAQ8plex)							0	5.862e-10
vSSTSASAAEGDAAAAVTR	2	1	1	Q39168	N-Term(iTRAQ8plex)	0.730111	0.706841	0.806266	1.28633	1.11614	1.50851	0	3.164e-11
QNASYQAGQATGQTk	2	1	1	Q9M892	K15(iTRAQ8plex)	0.47524	0.511305	0.38342	0.50434	3.85573	0.677084	0	7.516e-10
vLPALAAAMDDFQNPR	2	1	1	Q93VS8	N-Term(iTRAQ8plex)	1.14083	1.00224	0.904343	1.18168	0.986222	0.742982	0	5.606e-12
vVTIDSYEDVPENSEASLk	1	1	1	Q9FMH8	N-Term(iTRAQ8plex); K19(iTRAQ8plex)	0.819891	0.853706	0.864897	1.06731	1.25963	1.29933	0	2.711e-10
gIFWQEDIIPFFQSAk	7	1	1	Q9SRT9	N-Term(iTRAQ8plex); K16(iTRAQ8plex)	1.12311	1.16641	1.0394	0.954962	1.00763	0.79233	0	5.546e-10
gGAAAVMQSAATANk	6	1	1	Q9LJ97	N-Term(iTRAQ8plex); K15(iTRAQ8plex)	0.976479	1.01577	0.974242	1.0472	1.0783	1.00498	0	2.077e-13
dYADILEFLVGR	2	2	1	O22832	N-Term(iTRAQ8plex)	0.922142	1.37143	1.15653	0.924998	0.960533	0.609285	0	2.089e-07
gSQQAAVSFLSNLAk	3	1	1	O04331	N-Term(Acetyl); K15(iTRAQ8plex)	1.24569	1.04726	1.02762	0.91242	0.841745	0.907287	0	3.205e-09
qNASYQAGQATGQTk	16	1	1	Q9M892	N-Term(iTRAQ8plex); K15(iTRAQ8plex)	0.603918	0.610652	0.615825	1.50614	1.26183	1.45866	0	6.45e-15
nAGVPTVPGSDGLLQSTEEAVR	2	3	1	O04983	N-Term(iTRAQ8plex)	0.883896	0.997253	1.02761	1.04059	1.00485	1.03629	0	4.166e-13
nADEEEGGELVFGGVDPNHFk	3	3	1	O65390	N-Term(iTRAQ8plex); K21(iTRAQ8plex)	1.25712	1.22708	1.19417	0.801218	0.832637	0.591099	0	6.963e-14
fAVASVAAVSADAGGGAPAAAk	3	2	1	Q42112	N-Term(iTRAQ8plex); K22(iTRAQ8plex)	1.04246	1.00258	1.01066	0.976294	1.02428	0.988441	0	3.576e-13
gEDFPTENYIVk	5	3	1	Q9S7E4	N-Term(iTRAQ8plex); K12(iTRAQ8plex)	0.869424	1.12373	0.889789	1.07453	1.20991	0.97092	0	1.461e-11
gPGAGAQVTAGGIFSDILR	1	2	2	Q9SA18;O81852	N-Term(iTRAQ8plex)							0	1.047e-10
gTAYGATAPMVAAFSSR	5	1	1	Q84WS0	N-Term(iTRAQ8plex)	0.918916	0.882279	0.925684	1.22986	1.01414	0.969431	0	3.016e-14
vEDGIFGTSGGIGFTk	4	3	1	Q94EI1	N-Term(iTRAQ8plex); K16(iTRAQ8plex)	1.0296	1.02691	1.0806	0.984974	1.00662	0.895014	0	1.739e-09
aASALSSNVPPVVLAk	13	2	1	Q9XI01	N-Term(iTRAQ8plex); K16(iTRAQ8plex)	1.03189	1.07589	1.03517	0.935905	1.01896	0.86239	0	3.165e-12
lSELLGVEVVMANDSIGEEVQk	4	2	1	Q9SAJ4	N-Term(iTRAQ8plex); K22(iTRAQ8plex)	1.21099	1.14665	1.23524	0.795194	0.719724	0.724604	0	1.228e-11
sEAGQIEyWDHNHPQLR	99	2	1	Q96318	N-Term(iTRAQ8plex); Y8(iTRAQ8plex)	1.05772	1.17672	1.1553	0.890746	0.86127	0.82059	0	4.53e-14
qFSAEEISSMVLIk	6	1	1	Q9LHA8	N-Term(iTRAQ8plex); K14(iTRAQ8plex)	0.954685	1.07346	1.02113	1.00165	1.03013	0.951879	0	3.682e-10
cFVGGLAWATNDEDLQR	1	7	1	Q03251	C1(Carbamidomethyl)							0	9.282e-07
gFGFVAFSDPAVIDR	3	1	1	O22791	N-Term(iTRAQ8plex)	0.817001	0.761575	0.961644	1.0311	1.24171	1.12519	0	1.22e-10
aEEEGIEIDESk	6	2	1	Q07187	N-Term(iTRAQ8plex); K12(iTRAQ8plex)	0.862898	0.748833	0.745223	1.20064	1.23264	1.2799	0	3.745e-12
vASPAQAQEVHDELR	6	1	1	P48491	N-Term(iTRAQ8plex)	1.12116	0.984621	0.95749	0.939617	0.995929	1.1016	0	1.362e-12
yGQDAcNVGDEGGFAPNVQDNR	2	1	1	Q9C9C4	N-Term(iTRAQ8plex); C6(Carbamidomethyl)	1.04425	0.954026	1.1796	0.973654	0.832778	1.02864	0	1.565e-13
vIVAIENPQDIIVQSAR	8	2	1	B9DG17	N-Term(iTRAQ8plex)	0.940459	1.11726	0.931193	1.03478	1.01639	0.987575	0	2.932e-12
gGPAAVMQSAATTNIR	18	1	1	Q9LJ95	N-Term(iTRAQ8plex)	0.903517	0.874144	0.945472	1.14419	1.16026	1.11361	0	1.271e-15
sEVFSTAADGQTSVEINVLQGER	2	2	2	Q9LTX9;Q9STW6	N-Term(iTRAQ8plex)							0	3.066e-13
aNLLSGEDFEPALIPAk	4	1	1	P29402	N-Term(iTRAQ8plex); K17(iTRAQ8plex)	1.01666	1.04905	1.0517	0.96347	0.998512	0.948339	0	8.374e-10
kDLYGNIVLSGGSTMFPGIADR	2	1	1	P53492	N-Term(iTRAQ8plex); K1(iTRAQ8plex)	1.17571	1.07033	1.14195	0.843279	0.913051	0.778856	0	1.025e-13
vVTIDSYEDVPTYSEESLk	1	3	1	Q56XI5	N-Term(iTRAQ8plex); K19(iTRAQ8plex)	0.748717	0.8004	0.755074	1.38109	1.34559	1.22099	0	2.626e-09
gSSADTSGLALILIDk	2	1	1	F4HWQ8	N-Term(iTRAQ8plex); K16(iTRAQ8plex)	0.731229	0.754131	0.768799	1.26805	1.53529	1.19336	0	2.803e-15
qmAMGAADAVk	40	3	1	Q9LW12	N-Term(iTRAQ8plex); M2(Oxidation); K11(iTRAQ8plex)	0.720022	0.760035	0.742327	1.24005	1.35192	1.23578	0	4.309e-06
vASPAQAQEVHDELRk	6	1	1	P48491	N-Term(iTRAQ8plex); K16(iTRAQ8plex)	1.07869	1.10995	1.12502	0.886914	0.966493	0.865223	0	3.669e-09
skEDGGVGSDSAYTVAQYNSPFEFSGR	2	1	1	Q9SHG8	N-Term(iTRAQ8plex); K2(iTRAQ8plex)	0.886204	0.980196	0.979769	1.08852	1.19225	0.942486	0	9.709e-17
aLVSADPVVTSIGNk	2	1	1	Q9SCV9	N-Term(iTRAQ8plex); K15(iTRAQ8plex)	0.951833	1.10247	0.981237	0.905768	1.13792	0.84279	0	2.103e-10
iLVYGATYGGELEDAk	1	1	1	P48641	N-Term(iTRAQ8plex); K16(iTRAQ8plex)	1.03605	1.12619	0.924518	1.0125	1.12518	0.830801	0	3.338e-08
aAEGEVIAcHTVEDWTEk	4	2	1	Q42403	N-Term(Acetyl); C9(Carbamidomethyl); K18(iTRAQ8plex)	1.29085	1.08723	1.29722	0.730532	0.699752	0.78476	0	7.882e-10
fVIEPQGLFLPTFLNAGk	128	1	1	P15456	N-Term(iTRAQ8plex); K18(iTRAQ8plex)	0.670958	0.702202	0.674463	1.31111	1.63369	1.28409	0	2.748e-14
gPILLEDYHLVEk	5	4	1	P25819	N-Term(iTRAQ8plex); K13(iTRAQ8plex)	0.688314	0.638389	0.697196	1.3393	1.73335	1.3387	0	7.001e-13
lTDSFLDGTSSVYLEELQR	3	6	1	Q9FLH2	N-Term(iTRAQ8plex)	0.875913	0.932485	1.0581	1.18601	0.984967	1.03707	0	2.856e-11
dAGGGVSGEEMPSW	1	3	1	F4ITZ4	N-Term(iTRAQ8plex)	1.10917	0.886855	0.774179	1.03962	1.15619	1.12815	0	2.047e-08
aSNLIYVDQPVGTGFSYTSDQSDLR	1	1	1	Q56WF8	N-Term(iTRAQ8plex)	0.881467	0.928177	0.836919	1.16337	1.08594	1.25151	0	9.988e-14
gASGATLVVNSSWk	3	1	1	F4JVN6	N-Term(iTRAQ8plex); K14(iTRAQ8plex)	1.00953	0.990195	1.06359	1.09052	0.98727	1.02614	0	4.096e-14
vAIGQVLLSVR	2	5	2	Q93VT9;Q93W22	N-Term(iTRAQ8plex)							0	7.897e-10
tATTYESVEGGQNk	19	1	1	Q9SJ17	N-Term(iTRAQ8plex); K14(iTRAQ8plex)	0.695968	0.675766	0.65896	1.42263	1.44881	1.34976	0	1.605e-15
vLQFAGIDDVFTSSR	5	6	2	Q8L8Y0;P49688	N-Term(iTRAQ8plex)							0	1.315e-11
aAVAADTVVGYTAR	13	3	1	Q9SIN3	N-Term(iTRAQ8plex)	0.947657	0.943458	1.01706	1.05604	1.10306	1.00876	0	2.396e-12
dITGGSYIQSYYSk	2	2	1	Q940J8	N-Term(iTRAQ8plex); K14(iTRAQ8plex)	0.957599	1.01877	1.03319	0.955564	1.17193	0.911535	0	6.304e-12
dNLTLWTSDLNEEGDER	2	3	1	B9DFR1	N-Term(iTRAQ8plex)	0.887454	1.10773	1.05341	0.962558	1.09237	0.956113	0	1.242e-11
yHPEVDPDEVNALAQLMTWk	8	6	2	Q38946;Q43314	Y1(iTRAQ8plex); K20(iTRAQ8plex)							0	3.34e-12
aFIAGIADDNGYGWAIAk	6	1	1	Q9SLA8	N-Term(iTRAQ8plex); K18(iTRAQ8plex)	1.13472	1.2351	1.2047	0.757652	0.875795	0.7253	0	5.985e-11
mLGIFSGAIVSPPEELVAAGSR	1	3	1	Q94BR2	N-Term(Acetyl)							0	1.864e-08
qGETVVPGGTGGHSLEAQEHLAEGR	9	2	1	Q07187	N-Term(iTRAQ8plex)	0.783947	0.65528	0.729044	1.39454	1.39157	1.28416	0	3.491e-14
vFDGQVSQGQLIAVPQGFSVVk	138	2	1	P15455	N-Term(iTRAQ8plex); K22(iTRAQ8plex)	1.16606	1.03299	1.19385	0.91562	0.979516	0.831755	0	3.935e-11
tMEFSGTTIESLSMEER	2	1	1	Q94AR8	N-Term(iTRAQ8plex)	0.922608	0.915738	0.969474	1.12472	1.09391	1.07697	0	4.205e-13
cGQVVScSDILALAAR	3	1	1	Q96520	N-Term(iTRAQ8plex); C1(Carbamidomethyl); C7(Carbamidomethyl)	1.13638	1.14076	1.12671	0.814863	0.839972	0.945747	0	2.536e-10
vGLGASASSADSGk	1	1	1	Q9LDA7	N-Term(iTRAQ8plex); K14(iTRAQ8plex)	1.10986	1.07436	1.14533	0.859881	0.98496	0.807336	0	1.672e-14
vVALAAGSNVTLLADQVR	1	1	1	Q9XFS9	N-Term(iTRAQ8plex)	1.02345	0.951958	1.04935	0.941128	0.849134	1.21938	0	4.621e-12
vTIVQSSTVYNDTPATIDk	6	3	2	P32961;P46010	N-Term(iTRAQ8plex); K19(iTRAQ8plex)							0	4.105e-13
tMMETEEIGVSILQDLHGQR	3	1	1	Q9SEL6	N-Term(iTRAQ8plex)	0.934493	0.944976	0.963651	0.88634	1.06225	1.05539	0	3.799e-13
sIEFNPWQYGNISTE	1	1	1	Q93Y40	N-Term(iTRAQ8plex)	0.825532	0.862448	1.02443	1.05197	1.16703	1.19944	0	2.381e-07
dVGQQLALAFNPEGSVLAAGAEDGTLR	1	1	1	Q39221	N-Term(iTRAQ8plex)	1.8006	0.6814	1.04184	0.831053	0.734384	0.76834	0	1.735e-13
ikDAVVTVPAYFNDAQR	5	3	2	Q9LKR3;Q39043	N-Term(iTRAQ8plex); K2(iTRAQ8plex)							0	1.22e-13
aPEALVGLFHGk	8	4	2	Q8LDI4;Q39172	N-Term(iTRAQ8plex); K12(iTRAQ8plex)							0	1.229e-10
aLEGADLVIIPAGVPR	9	3	2	Q9ZP06;Q9LKA3	N-Term(iTRAQ8plex)							0	4.643e-12
sIGINSFGASAPAPLLYk	3	2	1	F4JBY2	N-Term(iTRAQ8plex); K18(iTRAQ8plex)	1.006	1.185	0.993831	0.975875	1.0407	0.820768	0	2.499e-11
gNASLLDYTATk	8	1	1	Q9FZ42	N-Term(iTRAQ8plex); K12(iTRAQ8plex)	0.896574	1.16053	0.9254	1.01119	1.1264	0.908576	0	9.905e-11
eQVFSTYADNQPGVLIQVYEGER	3	1	1	Q9S9N1	N-Term(iTRAQ8plex)	0.962026	1.12036	1.04928	1.01684	0.959581	0.966324	0	2.78e-12
vYIGQGDSGVTYVk	7	1	1	Q9LIF8	N-Term(iTRAQ8plex); K14(iTRAQ8plex)	0.932188	1.00532	0.898376	0.986092	1.23368	0.909408	0	3.351e-11
rVVDEVVNAFGR	3	1	1	Q9FZ42	N-Term(iTRAQ8plex)	1.603	0.653569	0.510558	1.03067	1.23024	1.08482	0	7.767e-09
gAIPAMPSMDAVQDLLSSTR	2	1	1	Q9FLH8	N-Term(iTRAQ8plex)	0.965562	0.684624	0.988286	1.26233	1.22793	1.01159	0	1.074e-11
vIDGAIGAEWLk	4	1	1	Q8RWN9	N-Term(iTRAQ8plex); K12(iTRAQ8plex)	1.04007	0.976183	1.05388	0.970805	1.03328	0.974227	0	3.252e-09
mGITGSGGGEAGQQGSMPLQk	2	3	1	Q8RY15	N-Term(iTRAQ8plex); K21(iTRAQ8plex)	0.648455	0.62148	0.683347	1.32777	1.36482	1.63793	0	1.442e-13
eAAAPAIGDTAQFPSLG	5	2	1	Q8LDQ7	N-Term(iTRAQ8plex)	0.86112	0.866469	0.826613	1.08712	1.13369	1.32572	0	2.73e-09
VIPGcAETFQDSSEFQPR	2	1	1	P15455	C5(Carbamidomethyl)							0	2.246e-07
aFDEGWGAVIAk	3	1	1	Q9LVI9	N-Term(iTRAQ8plex); K12(iTRAQ8plex)	0.998211	1.14876	1.05423	0.939874	1.09595	0.799866	0	3.709e-11
iINEPTAASLAYGFDR	5	1	1	Q9STW6	N-Term(iTRAQ8plex)	0.975085	0.989002	1.02184	1.0554	0.972913	0.964252	0	8.85e-09
aGIVESLDALVk	7	4	1	O22263	N-Term(iTRAQ8plex); K12(iTRAQ8plex)	0.963505	0.956233	1.03151	1.03879	1.12638	0.945123	0	1.671e-09
dIDANANDLQVESLAR	1	1	1	Q945Q1	N-Term(iTRAQ8plex)	1.03945	1.32116	1.0145	0.937942	0.79974	0.87524	0	2.1e-11
eTVVEVPNVSWNDIGGLENVk	1	1	1	P54609	N-Term(iTRAQ8plex); K21(iTRAQ8plex)	0.891983	1.06506	0.949502	1.04149	1.16437	0.987661	0	4.332e-10
hAANAGLVNALNLIk	2	3	1	F4JFY5	N-Term(iTRAQ8plex); K15(iTRAQ8plex)	0.742498	0.884599	0.842921	1.25273	1.26957	1.18383	0	3.916e-10
gIEIASPFQVFEEGNQFR	2	1	1	Q9ZVD5	N-Term(iTRAQ8plex)	1.13726	1.07298	0.992229	0.820676	0.936293	0.935604	0	8.181e-11
yIGLVATGITADAR	8	1	1	O81146	N-Term(iTRAQ8plex)	1.30778	1.01701	0.964262	0.898813	0.871059	0.937447	0	2.208e-09
tLSSALGSEEAAk	5	2	1	Q9C8W7	N-Term(iTRAQ8plex); K13(iTRAQ8plex)	0.827815	0.886007	0.882038	1.13511	1.09893	1.21172	0	4.246e-14
nDAPMGAGENMk	3	1	1	Q9FE54	N-Term(iTRAQ8plex); K12(iTRAQ8plex)	0.662724	0.671399	0.744188	1.53019	1.32342	1.42049	0	4.208e-12
iVEGDAEDLPFPTDYADR	1	2	1	C0Z2G4	N-Term(iTRAQ8plex)	1.03834	1.08238	0.996085	0.864907	1.09197	0.953892	0	2.489e-13
lNQVQAGLSALEEALk	2	2	1	Q8L972	N-Term(iTRAQ8plex); K16(iTRAQ8plex)	1.03208	0.968369	1.02541	0.964773	0.838762	1.2014	0	2.958e-11
TGSYMSETGEAIk	4	3	1	Q96270	K13(iTRAQ8plex)	0.749237	0.660045	0.684726	1.00073	2.11597	0.974419	0	2.312e-06
tAIIEGDVVGGTcVNR	4	2	2	A8MS68;F4JLP5	N-Term(iTRAQ8plex); C13(Carbamidomethyl)							0	1.238e-12
sDEISDPEQQIk	2	1	1	O23157	N-Term(iTRAQ8plex); K12(iTRAQ8plex)	0.986103	0.949566	0.959548	0.933736	1.18769	1.05503	0	5.59e-07
vYVGQGEDGIAFVk	4	1	1	O49326	N-Term(iTRAQ8plex); K14(iTRAQ8plex)	0.899907	1.01833	0.983079	1.02989	1.18726	0.921186	0	3.548e-11
vLVVANPANTNALILk	9	5	2	P93819;P57106	N-Term(iTRAQ8plex); K16(iTRAQ8plex)							0	2.145e-11
iLDEALAGDNVGLLLR	5	2	1	P17745	N-Term(iTRAQ8plex)	0.962634	1.12207	1.03991	0.947706	0.998444	0.981372	0	1.596e-10
aAAAVDAIGAYFSR	2	1	1	Q9LQ31	N-Term(iTRAQ8plex)	1.10558	1.03843	0.95894	1.07909	0.879832	0.926251	0	7.072e-10
nLNTAVVDccIGIPVYFTDLQR	2	3	2	F4HQD4;Q9S7C0	N-Term(iTRAQ8plex); C9(Carbamidomethyl); C10(Carbamidomethyl)							0	7.16e-14
aVSLQGQHGPFQSR	169	2	2	P15458;P15459	N-Term(iTRAQ8plex)							0	2.853e-12
aFGGSSIVDGQVELMLHR	2	3	1	Q8LPJ3	N-Term(iTRAQ8plex)	1.04334	0.841455	0.861912	0.99388	1.00262	1.27734	0	1.13e-14
sLVSDLINLNLSDSTDk	1	1	1	Q56WN1	N-Term(Acetyl); K17(iTRAQ8plex)	0.919736	1.0313	0.958814	0.867032	1.27148	1.03082	0	2.689e-08
sQIDEIVLVGGSTR	6	3	2	Q9LKR3;Q39043	N-Term(iTRAQ8plex)							0	6.011e-10
qMAMGATDAVk	9	2	1	Q96270	N-Term(iTRAQ8plex); K11(iTRAQ8plex)	0.546397	0.639272	0.610248	1.4909	1.66536	1.55767	0	1.776e-08
dLMAADWAELPSAVVk	1	1	1	Q9SX77	N-Term(iTRAQ8plex); K16(iTRAQ8plex)	1.12215	0.946853	1.07397	1.08888	0.965985	0.836232	0	1.297e-12
tSSEPLDLVVTVVSAk	3	1	1	Q9LNV0	N-Term(Acetyl); K16(iTRAQ8plex)	0.823137	0.676594	0.833337	1.34506	1.42351	1.27643	0	1.216e-09
dAGAISGLNVLR	4	1	1	Q9S9N1	N-Term(iTRAQ8plex)	1.10181	1.18518	1.18955	0.823335	0.888264	0.816056	0	1.447e-08
vVMELFADVTPR	6	1	1	Q38867	N-Term(iTRAQ8plex)	0.882208	0.764435	0.775112	1.26206	1.32409	1.23869	0	6.674e-08
aFADASMNTAYEk	1	1	1	Q9SRZ6	N-Term(iTRAQ8plex); K13(iTRAQ8plex)	1.10242	1.20579	1.12742	0.811948	0.942735	0.771202	0	4.064e-13
tGQVPDPTSTDNPEFQIVLSIIk	5	9	1	O23255	N-Term(iTRAQ8plex); K23(iTRAQ8plex)	1.06494	1.17685	1.12777	0.86736	0.925201	0.792916	0	5.311e-10
qSVNPNQSGPTASSSTGTGEGQR	1	4	1	Q9LMB2	N-Term(iTRAQ8plex)	0.96428	0.89701	0.913357	1.1016	1.22991	1.01386	0	1.581e-13
LYSSLWNADQWATR	2	1	1	Q38907								0	1.005e-07
nMVESLGVPTFR	2	1	1	Q9C8P0	N-Term(iTRAQ8plex)	1.13929	1.26979	1.27656	0.813811	0.659306	0.728294	0	6.061e-11
dLLEQFTSEVAQLQGR	1	1	1	P0CZ23	N-Term(iTRAQ8plex)	0.959281	0.946791	0.963043	1.24732	1.08925	0.913088	0	3.674e-10
yVIEQGGLYLPTFFTSPk	498	2	1	Q96318	N-Term(iTRAQ8plex); K18(iTRAQ8plex)	1.02657	1.09155	1.03041	0.914893	1.07977	0.886652	0	4.14e-12
nHNADEAVDFYHR	10	1	1	Q9LIF9	N-Term(iTRAQ8plex)	0.98197	1.00644	0.950977	1.00253	0.903851	0.897101	0	2.113e-11
lLGLScDDVQSHk	12	1	1	O04005	N-Term(iTRAQ8plex); C6(Carbamidomethyl); K13(iTRAQ8plex)	0.897509	0.966644	0.877993	1.08072	1.15339	1.02523	0	9.853e-13
qFLLGSSFMISPVLEQGk	2	1	1	Q9S7Y7	N-Term(iTRAQ8plex); K18(iTRAQ8plex)	1.09519	1.06943	1.21626	0.9785	0.835301	0.769951	0	4.709e-12
sGTGFGVATLVEWVQk	2	3	1	P30184	N-Term(iTRAQ8plex); K16(iTRAQ8plex)	1.04203	1.13564	1.04131	0.980211	0.900178	0.912919	0	1.204e-13
lDLAEVADFVk	2	1	1	O80526	N-Term(iTRAQ8plex); K11(iTRAQ8plex)	1.02884	1.14962	1.10356	0.828249	1.0616	0.81558	0	1.164e-08
iEEELGSEAIYAGVNFR	8	2	1	P25696	N-Term(iTRAQ8plex)	1.0247	1.10135	1.02135	0.959195	0.99797	0.906366	0	1.782e-13
lVDIGTVTAQQAk	2	5	1	B5TM95	N-Term(iTRAQ8plex); K13(iTRAQ8plex)	1.0508	1.11523	1.06505	0.959687	0.918286	0.894785	0	1.718e-13
nPNFLGcVENALGIR	4	1	1	Q9S7E4	N-Term(iTRAQ8plex); C7(Carbamidomethyl)	1.18945	1.14163	1.07164	0.924394	0.718762	0.825322	0	1.717e-10
mSLGLPVAATVNcADNTGAk	6	3	1	F4J3P1	N-Term(iTRAQ8plex); C13(Carbamidomethyl); K20(iTRAQ8plex)	0.825633	0.819488	0.878598	1.2037	1.1931	1.23763	0	1.09e-12
nINVNVVcPGFIASDMTAELGEDMEk	1	1	1	P33207	N-Term(iTRAQ8plex); C8(Carbamidomethyl); K26(iTRAQ8plex)	1.28153	1.1347	1.08986	0.734607	0.760813	0.909375	0	3.002e-12
tGSYmSETGEAIk	9	3	1	Q96270	N-Term(iTRAQ8plex); M5(Oxidation); K13(iTRAQ8plex)	0.652141	0.945039	0.728661	1.35368	1.32425	1.22629	0	2.663e-09
fGIVEGLMTTVHSITATQk	4	3	2	P25858;Q9FX54	N-Term(iTRAQ8plex); K19(iTRAQ8plex)							0	4.392e-15
vNVEVDQIESWFk	5	1	1	Q9SRG3	N-Term(iTRAQ8plex); K13(iTRAQ8plex)	1.09447	1.21071	1.16409	0.82334	0.937041	0.72363	0	7.767e-11
gESSVTGPVVR	3	2	1	Q9XI01	N-Term(iTRAQ8plex)	0.941684	1.03792	1.01467	1.11688	1.0033	0.927572	0	1.042e-07
aTDAAVSTGDNMk	7	1	1	Q9LDN8	N-Term(iTRAQ8plex); K13(iTRAQ8plex)	0.734951	0.739109	0.681425	1.28438	1.62009	1.29212	0	1.312e-10
aAAVGANNQAAQSILk	2	1	1	O81148	N-Term(iTRAQ8plex); K16(iTRAQ8plex)	0.853898	0.984517	1.07581	0.987233	0.998963	1.13764	0	1.112e-11
dDLFNINAGIVk	7	3	2	Q9ZP06;Q9LKA3	N-Term(iTRAQ8plex); K12(iTRAQ8plex)							0	1.468e-12
qSVDFNSIAFLFDGR	2	2	1	Q9FLP6	N-Term(iTRAQ8plex)	0.917349	1.03925	0.971522	1.10036	1.10219	0.953154	0	1.256e-13
eANLYSEIAEGISSYGVTR	2	1	1	Q93Z70	N-Term(iTRAQ8plex)	0.873634	0.7616	0.8099	1.19553	1.35114	1.19205	0	9.843e-14
dVQEASVYEGYTLPk	3	3	2	P49206;Q8LPJ7	N-Term(iTRAQ8plex); K15(iTRAQ8plex)							0	1.722e-09
iQQVGVcPFQIPSIPSYY	8	1	1	P15460	N-Term(iTRAQ8plex); C7(Carbamidomethyl)	1.0811	0.852199	0.835158	1.2097	1.16898	1.1682	0	2.335e-07
eQEAVNFLEk	2	3	2	O81146;F4IIA5	N-Term(iTRAQ8plex); K10(iTRAQ8plex)							0	3.592e-09
gSNMPVSDEGEGETk	4	3	1	Q9SIN3	N-Term(iTRAQ8plex); K15(iTRAQ8plex)	0.741864	0.820198	0.828005	1.19109	1.59052	1.05977	0	4.003e-12
qNSPVGLMVQQPPSR	6	1	1	Q9XFK7	N-Term(iTRAQ8plex)	0.805539	0.852409	0.895849	1.2088	1.027	1.27234	0	1.063e-13
gLTDELGAEAMMFEALEk	3	2	1	Q9SJ12	N-Term(iTRAQ8plex); K18(iTRAQ8plex)	0.744047	0.782621	0.75331	1.29078	1.53365	1.13346	0	1.127e-10
dQVESVINTIIEGAR	6	1	1	Q9ZST4	N-Term(iTRAQ8plex)	1.1069	0.985542	1.01134	1.00529	0.899132	1.09633	0	5.84e-09
fSITTFSPAGVAITSTGTk	4	2	1	Q9SRH5	N-Term(iTRAQ8plex); K19(iTRAQ8plex)	1.06088	1.03161	1.13629	0.960406	0.997146	0.800451	0	4.37e-11
dLYINQAVHMDISGNR	2	1	1	Q8LD03	N-Term(iTRAQ8plex)	0.897606	0.965661	0.892332	1.08911	1.13962	1.13183	0	6.768e-14
fVQAGSEVSALLGR	2	1	1	P19366	N-Term(iTRAQ8plex)	0.931214	1.11052	0.99645	1.03137	1.00453	0.983859	0	5.908e-10
aHVAVFNTLLQVLDDGR	1	1	1	P42730	N-Term(iTRAQ8plex)	0.722485	0.69761	0.851884	1.70652	0.953339	1.34395	0	1.073e-13
vLLQDFTGVPAVVDLAcMR	5	2	2	Q42560;Q9SIB9	N-Term(iTRAQ8plex); C17(Carbamidomethyl)							0	8.711e-12
LAQITVPVNNPGNYk	6	1	1	Q9LUJ7	K15(iTRAQ8plex)	0.702261	0.767064	0.769073	0.769222	2.38862	0.71876	0	2.096e-08
sAAEVVSDTAEAVk	5	1	1	Q9FE54	N-Term(iTRAQ8plex); K14(iTRAQ8plex)	0.829451	0.873614	0.845019	1.14923	1.33893	1.15194	0	1.626e-09
vFDQEISSGQLLVVPQGFSVMk	72	1	1	P15456	N-Term(iTRAQ8plex); K22(iTRAQ8plex)	1.15251	0.983814	1.19417	0.904206	1.00566	0.848322	0	9.234e-12
gNEMAEVLMDFPQLTMTLPDGR	1	2	1	O23654	N-Term(iTRAQ8plex)	1.11052	0.8798	0.736437	1.24019	0.858779	1.2834	0	1.812e-11
qMAmGATDAVk	12	2	1	Q96270	N-Term(iTRAQ8plex); M4(Oxidation); K11(iTRAQ8plex)	0.655686	0.704758	0.675397	1.34691	1.4097	1.36765	0	3.441e-08
eQIFSTYSDNQPGVLIQVYEGER	2	1	1	Q9LHA8	N-Term(iTRAQ8plex)	1.01891	0.926671	1.04684	1.02567	1.12808	0.906787	0	1.124e-12
vEIESLFDGVDFSEPLTR	4	2	1	Q9LKR3	N-Term(iTRAQ8plex)	1.41065	1.08252	1.19274	0.742025	0.746921	0.68479	0	1.864e-12
sFESLLGTLQDk	4	1	1	Q9LYR4	N-Term(iTRAQ8plex); K12(iTRAQ8plex)	1.09854	1.16817	1.20028	0.823241	0.912876	0.792372	0	9.61e-13
aQLGLPELTLGVIPGFGGTQR	2	2	1	Q9ZPI6	N-Term(iTRAQ8plex)	1.42502	0.988884	0.977716	0.858551	0.879723	0.786483	0	6.587e-12
vFAETLLTNPGASk	4	1	1	Q9FM65	N-Term(iTRAQ8plex); K14(iTRAQ8plex)	0.842106	0.896126	0.866763	1.19263	1.25505	1.05216	0	7.835e-12
gVNPWIEVDGGVTPANAYk	3	2	1	Q9SAU2	N-Term(iTRAQ8plex); K19(iTRAQ8plex)	0.916734	1.06368	0.922523	1.05479	1.26684	0.962173	0	1.068e-12
aATAQANSLNk	1	5	1	Q67YV9	N-Term(iTRAQ8plex); K11(iTRAQ8plex)	1.04416	1.01602	1.27775	0.865975	1.01833	0.765442	0	2.811e-11
mADAVGYAGMk	35	1	1	Q42431	N-Term(iTRAQ8plex); K11(iTRAQ8plex)	1.04928	1.07895	1.1396	0.861261	0.94701	0.822644	0	5.079e-11
qIVMGGQGQFNYEFFPk	4	2	1	Q93Z02	N-Term(iTRAQ8plex); K17(iTRAQ8plex)	0.993187	1.04847	0.829218	0.982812	1.02955	1.21521	0	1.955e-11
vTEAVVGSGEEADk	6	3	1	Q3E8H9	N-Term(iTRAQ8plex); K14(iTRAQ8plex)	0.768365	0.730417	0.732461	1.25768	1.49278	1.21316	0	4.202e-14
PGITLGDTVPNLEVETTHDk	7	1	1	O04005	K20(iTRAQ8plex)	0.690989	0.695512	0.600189	1.04127	1.95364	1.34419	0	9.678e-12
aAGVGALQAVSR	7	1	1	Q0WMZ5	N-Term(iTRAQ8plex)	1.07713	1.20339	1.05492	0.827231	0.834459	0.936479	0	1.586e-08
tSDLVALSGGHTFGR	4	1	1	P24102	N-Term(iTRAQ8plex)	0.784627	0.897366	0.831829	1.25147	1.1601	1.26246	0	2.948e-11
tDALDAAGNTTAAIGk	3	3	1	P31414	N-Term(iTRAQ8plex); K16(iTRAQ8plex)	0.857181	1.03649	0.96753	0.992908	1.03541	1.08852	0	5.652e-13
mQNEEGQVTELYIPR	1	1	1	Q3E902	N-Term(Acetyl); M1(Oxidation)							0	4.497e-10
lLAQANVMEEALMIYR	2	2	1	Q8GXE5	N-Term(iTRAQ8plex)	1.41222	0.839867	0.981931	0.925751	0.676685	1.04659	0	4.385e-11
sDGVSLSPDEYITDVTGYYk	2	1	1	Q9LIF8	N-Term(iTRAQ8plex); K20(iTRAQ8plex)	0.96029	0.960177	0.995251	1.07541	1.08381	0.991047	0	5.765e-09
hFQFQSPYEGGR	36	1	1	Q39165	N-Term(iTRAQ8plex)	1.11259	1.06663	1.13961	0.963343	0.80691	0.912087	0	7.182e-10
fQEGLEcGGAYLk	2	3	1	P29402	N-Term(iTRAQ8plex); C7(Carbamidomethyl); K13(iTRAQ8plex)	1.08659	1.26007	1.17183	0.769905	0.882334	0.743764	0	3.635e-12
nLRPFLIAGNNPQGQEWLQGR	45	1	1	P15456	N-Term(iTRAQ8plex)	0.920183	0.753813	1.11894	1.31847	0.815611	1.21748	0	9.541e-14
vSIIDNFDNSVIEAVDR	2	1	1	Q42605	N-Term(iTRAQ8plex)	0.820633	0.777515	0.872337	1.17503	1.15048	1.34606	0	5.038e-10
aMDLNWELTAPWTGAk	3	1	1	Q9M9W5	N-Term(iTRAQ8plex); K16(iTRAQ8plex)	1.07805	1.14866	1.11516	0.865073	0.998959	0.815716	0	2.975e-11
aFFTSGGSDANDTQVk	1	1	1	Q94CE5	N-Term(iTRAQ8plex); K16(iTRAQ8plex)	0.896646	0.99862	1.01487	1.16929	1.08263	0.947165	0	7.001e-11
lDAGGILSHSIELEAk	4	2	1	Q9FMU7	N-Term(iTRAQ8plex); K16(iTRAQ8plex)	0.990621	1.17252	1.0055	0.951872	0.99956	0.884791	0	6.018e-13
eQEFIEATSEPGITFLLAk	4	2	1	F4JGD2	N-Term(iTRAQ8plex); K19(iTRAQ8plex)	0.974046	1.01675	1.05096	0.954049	1.18067	0.939452	0	7.846e-12
dQISIVFGDADGNk	21	4	1	B9DGU8	N-Term(iTRAQ8plex); K14(iTRAQ8plex)	0.663401	0.74098	0.672446	1.31139	1.63534	1.28334	0	1.214e-15
sSLVGVGSGMPVDESSSQMk	5	1	1	Q9T0G0	N-Term(iTRAQ8plex); K20(iTRAQ8plex)	0.963134	1.06437	1.03949	1.01989	1.03035	1.03309	0	4.637e-14
iSDNYSSLLQVSEALGR	1	1	1	Q9SS90	N-Term(iTRAQ8plex)	0.925217	0.968509	0.883731	1.02776	1.12746	1.17668	0	5.769e-15
sVAQQQAGGAADQLASLSLGDNIVP	2	1	1	Q9FXA2	N-Term(iTRAQ8plex)	0.993721	1.19487	0.851992	0.872043	0.847777	1.19752	0	5.877e-10
fLSVTEPSLLGDGGDLEIR	1	2	1	Q9SIF2	N-Term(iTRAQ8plex)	1.15865	0.977531	1.0627	0.748658	0.885501	1.13999	0	2.964e-11
aQYYGQQHTGGEHDR	22	1	1	P29525	N-Term(iTRAQ8plex)	0.965719	1.24113	0.96351	0.844586	0.933333	0.815943	0	5.492e-12
gVVFATEALLAEYGk	2	4	1	Q38946	N-Term(iTRAQ8plex); K15(iTRAQ8plex)	0.88497	0.964427	0.867908	1.14412	1.22788	1.04643	0	2.567e-10
dLGINDEVMLLSDGNGEFTGk	2	1	1	Q949U7	N-Term(iTRAQ8plex); K21(iTRAQ8plex)	1.04021	1.11036	1.13092	0.804559	0.947663	0.916624	0	5.115e-13
tLFNELEVVEGMk	5	3	2	F4IVR2;P29197	N-Term(iTRAQ8plex); K13(iTRAQ8plex)							0	1.678e-11
aENYHQQYLAk	5	1	1	P54150	N-Term(iTRAQ8plex); K11(iTRAQ8plex)	0.76514	0.74421	0.732609	1.25322	1.53538	1.16263	0	1.405e-08
lAYGGAQEYFGITPDLTTLGk	2	2	1	P42799	N-Term(iTRAQ8plex); K21(iTRAQ8plex)	0.989892	1.23491	1.05224	0.82792	0.933293	0.945018	0	1.322e-12
eSGVINEQNLAESk	3	1	1	P19366	N-Term(iTRAQ8plex); K14(iTRAQ8plex)	0.990883	1.06535	1.01777	0.939078	1.00266	0.801802	0	1.459e-13
aVAGAGVLSGYDk	4	5	1	P31167	N-Term(iTRAQ8plex); K13(iTRAQ8plex)	1.04119	1.09391	1.04781	0.892959	0.9429	1.01347	0	1.583e-12
gLDGHVMEQLk	20	2	2	Q39132;Q9LQT7	N-Term(iTRAQ8plex); K11(iTRAQ8plex)							0	7.274e-11
vTGGEVGAASSLAPk	7	3	2	Q9LFH5;Q9FF52	N-Term(iTRAQ8plex); K15(iTRAQ8plex)							0	1.85e-08
qDLPNAMNAAEITDk	7	7	1	P36397	N-Term(iTRAQ8plex); K15(iTRAQ8plex)	1.02882	0.998629	1.01915	0.989504	1.05142	0.977045	0	6.57e-12
iLEANVISEFLSR	2	2	1	Q8GZ29	N-Term(iTRAQ8plex)	1.16624	1.0352	0.970065	0.948792	0.845182	1.02449	0	7.141e-10
aVEVEPTIDYGGGGGIGGDk	1	1	1	Q94A32	N-Term(iTRAQ8plex); K20(iTRAQ8plex)	0.944813	1.01138	1.06354	0.902102	1.12064	1.01292	0	5.951e-13
nNEPQFLAGEDSALR	11	1	1	F4JQG6	N-Term(iTRAQ8plex)	1.11284	1.12127	1.1434	0.933043	0.750756	0.955957	0	2.588e-09
kADVIAAANTAADVALR	1	1	1	Q96327	N-Term(iTRAQ8plex); K1(iTRAQ8plex)	1.0841	1.07164	1.08831	0.9013	0.884909	0.966064	0	1.235e-12
gELQcIGATTIDEYR	4	4	1	Q9FI56	N-Term(iTRAQ8plex); C5(Carbamidomethyl)	0.915638	0.924659	1.24006	0.928017	0.82826	1.13144	0	5.807e-14
nYLDAQYYGDITIGTPPQk	8	2	1	F4JGD2	N-Term(iTRAQ8plex); K19(iTRAQ8plex)	0.875695	1.04188	0.960006	1.02929	1.13208	1.11664	0	2.278e-09
vFDQEISSGQLLVVPQGFSVmk	44	1	1	P15456	N-Term(iTRAQ8plex); M21(Oxidation); K22(iTRAQ8plex)	1.06287	0.923257	1.10587	0.995768	1.02058	0.944967	0	5.404e-10
vGTEAHTAMTEYDR	4	4	1	P17094	N-Term(iTRAQ8plex)	0.949185	0.960332	0.980459	1.03991	1.11273	1.01347	0	1.463e-12
iPTVGScQFk	34	1	1	Q9FH31	N-Term(iTRAQ8plex); C7(Carbamidomethyl); K10(iTRAQ8plex)	0.641814	0.594974	0.650477	1.40027	1.49423	1.38594	0	3.703e-05
vPTPNVSVVDLVVQVSk	3	5	2	P25856;Q9LPW0	N-Term(iTRAQ8plex); K17(iTRAQ8plex)							0	9.454e-06
tMLELLNQLDGFSSDER	4	1	1	Q9SEI2	N-Term(iTRAQ8plex)	1.24769	1.01269	1.11212	0.947235	0.697132	0.863373	0	1.78e-11
mVEAMEQGLPVVSEAWLIDSVEk	2	1	1	Q9FK91	N-Term(iTRAQ8plex); K23(iTRAQ8plex)	1.10495	1.13882	1.1278	0.830221	0.987118	0.781905	0	1.785e-11
vDVTVGSALDIFGGNLPYk	1	2	1	O82782	N-Term(iTRAQ8plex); K19(iTRAQ8plex)	1.34081	1.04498	0.845602	0.786212	0.946568	0.997679	0	1.535e-09
sGALNMTLDEIVk	1	2	1	A8MQ78	N-Term(Acetyl); K13(iTRAQ8plex)	0.878547	0.843587	0.961139	1.25456	1.12661	1.08982	0	1.274e-07
mESAGIQQLLAAER	1	1	1	O82629	N-Term(Acetyl)							0	1.214e-08
tNANAQINTLAGR	32	2	1	P15455	N-Term(iTRAQ8plex)	1.0833	1.12031	1.21307	0.943425	0.710049	0.877211	0	1.454e-06
eLINSPANVLTPAVLAEEAAk	2	1	1	P30184	N-Term(iTRAQ8plex); K21(iTRAQ8plex)	0.802228	0.820981	0.970363	0.942455	1.20279	1.15754	0	1.741e-10
lEAALAATEIR	4	3	1	Q8RU07	N-Term(iTRAQ8plex)	1.24107	1.05148	1.18686	0.871855	0.716093	0.76237	0	1.836e-07
lVPGNSAGTVTAYYLk	3	1	1	Q38907	N-Term(iTRAQ8plex); K16(iTRAQ8plex)	0.98607	0.940373	0.986874	0.924035	1.16877	1.05319	0	7.321e-10
yYAENEGAFFEQFAk	4	1	1	Q9SD46	N-Term(iTRAQ8plex); K15(iTRAQ8plex)	1.11525	0.961703	1.01317	0.903521	1.10159	0.922564	0	8.327e-11
vSPEVIAEHTVR	13	1	1	Q9LF98	N-Term(iTRAQ8plex)	1.06076	1.12313	1.09808	0.879533	0.889606	0.889373	0	7.456e-08
tVTSVGGAGTYSVk	3	1	1	O65351	N-Term(iTRAQ8plex); K14(iTRAQ8plex)	1.09201	1.09792	1.00331	0.98319	0.912654	0.896691	0	1.703e-14
fFPIDMDDGIEVR	9	1	1	Q9FK91	N-Term(iTRAQ8plex)	1.16927	1.15187	1.13475	0.843329	0.850022	0.868721	0	6.683e-12
mEITNVTEYDAIAk	3	5	1	Q2V3V9	N-Term(Acetyl); K14(iTRAQ8plex)	0.885229	0.965119	0.923723	1.17499	1.08362	0.996953	0	2.478e-08
gFGFVTYDSSQEVQNAIk	4	1	1	Q9ZUU4	N-Term(iTRAQ8plex); K18(iTRAQ8plex)	1.01393	1.02742	1.06218	0.985802	0.970878	0.97022	0	1.273e-12
fSQQETMLSmTPSSSS	21	1	1	Q9ZWA9	N-Term(iTRAQ8plex); M10(Oxidation)	0.909748	0.929882	0.929002	1.19265	1.03827	1.09807	0	3.367e-10
aGLEEPLEQIHk	5	2	1	P49200	N-Term(iTRAQ8plex); K12(iTRAQ8plex)	0.832851	0.783268	0.738004	1.18017	1.39665	1.00421	0	1.753e-10
vVLITGASSGIGEQLAYEYAcR	11	1	1	P0DKC6	N-Term(iTRAQ8plex); C21(Carbamidomethyl)	0.942854	0.848466	0.864397	1.00344	0.978122	1.14947	0	4.542e-12
gGINQAGIDYYNNLINELLSk	1	4	1	O64879	N-Term(iTRAQ8plex); K21(iTRAQ8plex)	0.96295	1.04961	0.799187	1.14426	1.35425	0.822036	0	2.519e-11
aASVDPLVVGR	2	1	1	Q9XFK7	N-Term(Acetyl)							0	1.589e-06
aAEAVEEFGGILTSIk	3	1	1	Q9SX77	N-Term(iTRAQ8plex); K16(iTRAQ8plex)	0.999207	1.04184	1.05971	0.97634	0.990624	0.883414	0	8.008e-08
aHGEGDLGTQALLLALER	2	1	1	Q9SZE1	N-Term(iTRAQ8plex)	1.15903	1.05252	1.12697	0.94281	0.749074	0.89094	0	1.26e-13
gFFEVTHDITQLTSADFLR	6	1	1	Q96528	N-Term(iTRAQ8plex)	0.72474	0.715104	0.70422	1.218	1.40243	1.33309	0	3.905e-15
mFVADGGEcLVAQSYAk	2	1	1	P46644	N-Term(iTRAQ8plex); C9(Carbamidomethyl); K17(iTRAQ8plex)	1.04183	1.05043	1.07871	0.966056	0.902193	0.974612	0	6.431e-11
aDRDESSPYAAMLAAQDVAQR	4	3	3	P42036;Q9CAX6;Q9SIH0	N-Term(iTRAQ8plex)							0	7.974e-10
aILNESSEFVGDk	5	1	1	P48491	N-Term(iTRAQ8plex); K13(iTRAQ8plex)	0.966808	1.06279	1.01566	1.05441	1.05416	0.931777	0	1.369e-13
aAVEEGILPGGGVALLYAAR	4	1	1	P29197	N-Term(iTRAQ8plex)	0.989469	0.976456	0.977534	0.951864	0.956296	0.993607	0	1.924e-12
eGMATLAALNVLGR	1	1	1	Q9C9W5	N-Term(iTRAQ8plex)	1.0208	0.80032	1.05226	1.24347	1.05541	0.933235	0	8.635e-11
aGAEVIGISGDDSASHk	5	2	1	Q9LU86	N-Term(iTRAQ8plex); K17(iTRAQ8plex)	0.797595	0.841614	0.870593	1.34924	1.31806	1.20977	0	2.928e-13
eYVFIANSDNLGAIVDLk	4	2	1	P57751	N-Term(iTRAQ8plex); K18(iTRAQ8plex)	1.11575	1.17826	1.1203	0.798493	0.97882	0.821697	0	3.02e-11
qMAMGAADAVk	14	3	1	Q9LW12	N-Term(iTRAQ8plex); K11(iTRAQ8plex)	0.765533	0.652008	0.731701	1.42151	1.20722	1.29464	0	4.379e-11
lTVEPAEGGEQSILEADVVLVSAGR	1	1	1	Q9M5K3	N-Term(iTRAQ8plex)	0.706466	0.977974	0.830793	1.1833	1.22246	1.27472	0	2.819e-08
ISYVVQGTGISGR	4	2	1	Q96318								0	1.468e-07
aGVGSTmAV	4	1	1	O23029	N-Term(iTRAQ8plex); M7(Oxidation)	0.9284	0.850706	1.04173	1.17773	0.905508	1.06543	0	6.393e-05
aVAADDEEMDATQYYENR	1	1	1	Q9ZPI1	N-Term(iTRAQ8plex)	0.918492	0.903824	0.765748	1.25158	1.05653	1.26577	0	1.754e-12
iGSEISSLTLEEAR	4	3	1	P36212	N-Term(iTRAQ8plex)	1.18516	0.989725	1.11297	0.834155	0.842285	0.98992	0	1.608e-09
eDTGEYYAQAAk	11	1	1	Q9SUB2	N-Term(iTRAQ8plex); K12(iTRAQ8plex)	0.829621	0.765137	0.733128	1.3528	1.23155	1.32279	0	1.09e-11
sIQMEGLFWGASk	3	4	2	P48006;Q39124	N-Term(iTRAQ8plex); K13(iTRAQ8plex)							0	9.682e-12
dWGVPGDLFGALPGR	9	2	1	Q9LU86	N-Term(iTRAQ8plex)	0.753983	0.77762	0.845641	1.16674	1.22346	1.33788	0	1.22e-07
aVVQVFEGTSGIDNk	4	4	2	P11574;Q9SZN1	N-Term(iTRAQ8plex); K15(iTRAQ8plex)							0	3.629e-11
vQQELAEVVGLDR	1	3	1	Q42600	N-Term(iTRAQ8plex)	1.18128	1.02786	1.08327	0.718882	1.06411	0.889818	0	6.229e-11
mSAEGAAVQGSGWVWLGLDk	4	1	1	O81235	N-Term(iTRAQ8plex); K20(iTRAQ8plex)	0.898224	0.999774	0.915206	1.14698	1.24892	0.928224	0	1.91e-14
aVLDTNFWGSVYTTR	34	1	1	P0DKC6	N-Term(iTRAQ8plex)	1.01944	1.05217	1.04223	0.936869	1.04343	0.972036	0	5.584e-09
vYDVIFQFVPk	31	2	2	Q39132;Q9LQT7	N-Term(iTRAQ8plex); K11(iTRAQ8plex)							0	1.313e-09
acIVFFDEVDAIGGAR	2	1	1	Q9SSB5	N-Term(iTRAQ8plex); C2(Carbamidomethyl)	0.9905	1.14431	1.11332	0.846015	0.871367	1.0266	0	7.078e-10
mAGPFQDVAFNTPVGVTSAPFk	2	1	1	Q9FE18	N-Term(iTRAQ8plex); K22(iTRAQ8plex)	0.557778	0.591921	0.570567	1.35428	1.34519	1.82889	0	1.371e-10
lGEIEEFILMPNVANLQHVGDR	1	2	2	Q0WLB5;Q0WNJ6	N-Term(iTRAQ8plex)							0	2.209e-15
yNMNANEILYcTGGQGR	152	2	1	Q96318	Y1(iTRAQ8plex); C11(Carbamidomethyl)	0.976304	0.91594	0.981849	1.05361	1.10504	1.09361	0	9.333e-10
aLGDDIGVPIEVYGPEATMTGIck	1	3	1	Q9SGY2	N-Term(iTRAQ8plex); C23(Carbamidomethyl); K24(iTRAQ8plex)	0.84755	0.874388	0.895692	0.948451	1.00458	1.54909	0	3.205e-10
vLQAQDDIVNAMk	2	2	1	Q39258	N-Term(iTRAQ8plex); K13(iTRAQ8plex)	0.92302	1.01745	0.911426	1.05182	1.1052	1.08368	0	1.698e-11
tYMDAGEYGFGLQAMPLVPxNDcPR	3	3	2	Q8H7E1;Q8L742	N-Term(iTRAQ8plex); X20(L); C23(Carbamidomethyl)							0	4.028e-15
vEVEDGNILQISGER	8	3	2	P19036;P13853	N-Term(iTRAQ8plex)							0	3.505e-08
vALVTGGDSGIGk	5	1	1	Q9MA93	N-Term(iTRAQ8plex); K13(iTRAQ8plex)	1.00057	1.12671	1.14132	0.907471	0.967037	0.88589	0	6.662e-10
dTIILAGAEYGSGSSR	4	2	1	Q42560	N-Term(iTRAQ8plex)	0.972671	1.03545	1.03774	0.919442	1.06769	1.02997	0	6.835e-12
eIPSLQLINQTLSYAR	2	1	1	Q9SGW3	N-Term(iTRAQ8plex)	1.14727	1.06762	1.07949	0.838147	0.845179	0.968978	0	1.071e-12
qLQPQEYNTGTFTLSNLGMFGVDR	3	1	1	Q9C8P0	N-Term(iTRAQ8plex)	1.03554	1.02725	0.889025	0.982957	1.06832	1.06256	0	3.216e-08
aVAMSATEGLk	4	2	1	P19366	N-Term(iTRAQ8plex); K11(iTRAQ8plex)	0.997127	1.07833	1.18802	0.866064	0.967145	0.830862	0	6.178e-10
fGLGVGVHNEEGRDEFR	5	2	1	O04907	N-Term(iTRAQ8plex)	0.964063	1.02713	0.991913	0.963718	1.10475	1.08738	0	1.442e-07
aDVYKPQLGYISTLNSYDLPILR	7	2	1	P15455	N-Term(iTRAQ8plex)	1.0111	0.92831	0.920187	1.11576	1.12894	1.11712	0	2.162e-10
eGQNDIFYITGESk	2	5	2	P55737;P51818	N-Term(iTRAQ8plex); K14(iTRAQ8plex)							0	1.018e-12
iLESDPSSPGSLGIAISEAVEVAAR	1	1	1	Q9FFW8	N-Term(iTRAQ8plex)	0.970145	0.948475	0.833667	1.31932	1.26042	0.823156	0	1.178e-12
eQAVWALGNVAGDSPR	3	2	2	Q96321;F4JL11	N-Term(iTRAQ8plex)							0	2.639e-11
aLYTFDIGQNDLSVGFR	3	1	1	Q9LY84	N-Term(iTRAQ8plex)	1.06729	0.803933	0.884668	1.06656	1.11653	1.19189	0	5.088e-10
gDTAVAAAATPGANIAELIISR	2	2	1	Q9FLT0	N-Term(iTRAQ8plex)	1.02504	1.17635	0.994135	0.937548	1.02069	0.857687	0	3.349e-12
hVVFGQVVEGLNVVR	10	2	1	Q38900	N-Term(iTRAQ8plex)	0.829199	0.845862	0.761747	1.19443	1.19648	1.28985	0	1.012e-11
aAVGVDSR	1	1	1	Q9C5U3	N-Term(Acetyl)							0	0.0002016
iDGFVSGIGTGGTITGAGk	3	3	1	P47998	N-Term(iTRAQ8plex); K19(iTRAQ8plex)	1.05053	1.06518	1.11674	1.0056	0.86892	0.925045	0	1.434e-11
kGQSVAIFGLGAVGLGAAEGAR	5	1	1	P06525	N-Term(iTRAQ8plex); K1(iTRAQ8plex)	0.878866	0.923765	1.0293	1.16146	1.11383	1.09781	0	2.699e-14
gDSQYSFSLTTFSPSGk	4	2	1	O23708	N-Term(Acetyl); K17(iTRAQ8plex)	0.801626	0.899043	0.949219	1.08633	1.08192	1.22599	0	1.669e-09
dQLADALYQk	5	1	1	F4JVN6	N-Term(iTRAQ8plex); K10(iTRAQ8plex)	1.08684	1.11233	1.08973	0.815684	0.979043	0.825042	0	3.579e-09
lAEGTDITSAAPGVSLQk	4	1	1	Q9M7T0	N-Term(iTRAQ8plex); K18(iTRAQ8plex)	0.578893	0.583386	0.599593	1.4993	1.70595	1.4255	0	6.147e-12
gQALADEYGIk	2	4	2	P28186;Q9FJF1	N-Term(iTRAQ8plex); K11(iTRAQ8plex)							0	6.511e-10
tIVDGSLVIDSANk	2	1	1	Q8H0Y1	N-Term(iTRAQ8plex); K14(iTRAQ8plex)	0.893496	0.925718	1.03578	0.95963	0.966575	1.24126	0	7.273e-10
tYFDAPEGNEPLALDMEGMGk	2	2	1	Q9SCV9	N-Term(iTRAQ8plex); K21(iTRAQ8plex)	0.868898	0.836727	0.868122	1.2782	1.19327	1.12539	0	5.282e-12
aITLPGEGEIMDMMAVADPDAVHAVR	1	5	1	Q8H0S9	N-Term(iTRAQ8plex)	0.973586	0.902343	1.10272	1.21865	1.06737	0.829922	0	1.912e-11
QEEPVcVcPTLR	5	3	2	P15458;P15460	C6(Carbamidomethyl); C8(Carbamidomethyl)							0	1.877e-07
iSITGAGGFIASHIAR	1	1	1	Q93VR3	N-Term(iTRAQ8plex)	1.0124	0.852246	1.04887	0.991801	1.03222	1.12935	0	5.676e-14
gAVcLDGSAPAYHFDk	3	3	2	Q940J8;Q9FH82	N-Term(iTRAQ8plex); C4(Carbamidomethyl); K16(iTRAQ8plex)							0	1.098e-10
sLMGSVTTSNFLNPQDDLSFk	2	1	1	Q9STE8	N-Term(iTRAQ8plex); K21(iTRAQ8plex)	1.04065	0.942303	0.9722	1.03697	1.08034	0.995551	0	4.666e-13
aGVGSTMAV	10	1	1	O23029	N-Term(iTRAQ8plex)	0.995803	1.06315	0.97455	0.958971	0.977133	1.06926	0	0.0002294
aFDEVNTQLQTk	4	2	1	Q9FT52	N-Term(iTRAQ8plex); K12(iTRAQ8plex)	0.838679	0.860543	0.832675	1.20027	1.32856	1.10119	0	2.763e-10
lAMQEFMILPVGAASFk	6	2	1	P25696	N-Term(iTRAQ8plex); K17(iTRAQ8plex)	0.915546	1.12384	1.09075	0.956926	1.03918	0.858233	0	1.371e-11
aPSIVTDENILLLFDIQQk	3	3	1	F4JTN0	N-Term(iTRAQ8plex); K19(iTRAQ8plex)	1.12754	0.962428	1.00094	0.780756	0.912318	0.812136	0	1.65e-06
lVAGLPEGGVLLLENVR	9	2	1	Q9SAJ4	N-Term(iTRAQ8plex)	1.19722	1.23089	1.22046	0.734916	0.864033	0.725954	0	3.827e-13
sEAAAAFGNDGcYLEk	3	3	1	O04983	N-Term(iTRAQ8plex); C12(Carbamidomethyl); K16(iTRAQ8plex)	1.17316	1.11724	1.14943	0.89385	0.8425	0.827752	0	7.939e-11
eQLGHEGYQEIGHk	16	2	1	Q07187	N-Term(iTRAQ8plex); K14(iTRAQ8plex)	0.661484	0.71234	0.642402	1.34817	1.54727	1.31394	0	2.245e-14
sTGLDMSLDDMIAk	1	4	1	B3H4K4	N-Term(Acetyl); K14(iTRAQ8plex)	0.768476	0.893326	0.797841	1.17321	1.30251	1.26385	0	3.77e-07
qSGTTAGYSYSAANk	2	2	1	O23138	N-Term(iTRAQ8plex); K15(iTRAQ8plex)	0.788643	0.700652	0.884178	1.44558	1.07289	1.2646	0	1.08e-11
nVSYDSEVTAILENR	2	2	1	Q681P6	N-Term(iTRAQ8plex)	0.76263	0.851117	0.801517	1.24497	1.20913	1.29945	0	7.4e-14
lNLEAVGVELDQAGAVk	2	2	1	P48641	N-Term(iTRAQ8plex); K17(iTRAQ8plex)	0.977972	1.10605	1.01725	0.941326	1.09941	0.881764	0	2.667e-12
aLFSQVTSR	8	1	1	Q94EG6	N-Term(iTRAQ8plex)	0.710192	0.739231	0.758051	1.28979	1.3728	1.33627	0	2.691e-06
vAGASADILDAAEk	4	1	1	Q9XI93	N-Term(iTRAQ8plex); K14(iTRAQ8plex)	0.907223	0.85594	0.944662	1.13906	1.08738	1.16521	0	1.623e-12
tMLEIVNQLDGFDAR	1	1	1	Q9SSB5	N-Term(iTRAQ8plex)	0.989335	1.28909	1.0672	1.06795	0.713256	0.881456	0	8.447e-10
aWPTNPGPTTATMTcTVPSk	6	1	1	O64586	N-Term(iTRAQ8plex); C15(Carbamidomethyl); K20(iTRAQ8plex)	0.941248	0.99346	1.05653	0.98688	1.06178	0.912207	0	1.051e-09
sALENEcPETVScADLLALVAR	1	1	1	Q9SD46	N-Term(iTRAQ8plex); C7(Carbamidomethyl); C13(Carbamidomethyl)	0.94772	0.920811	0.86281	1.16777	1.14096	1.09213	0	3.507e-11
mENDAGQVTELYIPR	3	1	1	Q9M337	N-Term(Acetyl)							0	1.126e-10
fNTLETTLTR	134	2	1	Q96318	N-Term(iTRAQ8plex)	0.863897	0.873846	0.951101	1.29524	0.855537	1.27309	0	1.76e-06
sASDIATAELAPTHPIR	2	1	1	P42644	N-Term(iTRAQ8plex)	0.890913	1.08749	0.900395	1.00873	1.122	1.07802	0	4.803e-15
eTAAELFGEEGTWAR	2	1	1	Q93ZT6	N-Term(iTRAQ8plex)	0.971627	0.910574	1.02872	0.951483	1.04295	1.13249	0	2.392e-13
dVVFEYPVEA	3	1	1	Q8LD03	N-Term(iTRAQ8plex)	1.16712	0.897013	1.00851	0.910768	1.00884	0.993849	0	4.186e-06
eGLVLLIDAIEk	2	1	1	Q9C9C4	N-Term(iTRAQ8plex); K12(iTRAQ8plex)	1.03935	1.07907	1.12541	0.927441	1.00288	0.830853	0	3.454e-12
iVDDTITHFGR	33	1	1	P0DKC6	N-Term(iTRAQ8plex)	1.03473	1.12605	1.05557	0.861034	0.928567	0.925854	0	1.142e-08
lGAMGVAGGSIk	2	1	1	Q96329	N-Term(iTRAQ8plex); K12(iTRAQ8plex)	1.04661	1.08017	1.07754	0.933348	0.909934	0.960106	0	1.569e-09
nVDILGVELAk	2	2	1	Q9CAN8	N-Term(iTRAQ8plex); K11(iTRAQ8plex)	1.09735	1.11664	1.19456	0.820266	0.860116	0.867413	0	3.106e-11
gVQGVSLDELVGIFTR	3	1	1	Q9LTR2	N-Term(iTRAQ8plex)	1.24709	1.08066	0.908702	0.967217	0.89404	1.15496	0	9.78e-12
cTENLDDPSDADVyKPSLGYISTLNSYNLPILR	17	1	1	P15456	N-Term(iTRAQ8plex); C1(Carbamidomethyl); Y14(iTRAQ8plex)	1.28289	1.2097	1.28055	0.654261	0.741665	0.608632	0	8.703e-12
iELPLWTDIVk	5	2	1	Q9FNP8	N-Term(iTRAQ8plex); K11(iTRAQ8plex)	0.846026	0.990888	0.908636	1.05315	1.2631	1.00289	0	6.355e-10
gSSAALVLDGHDLk	3	5	1	Q8H0S9	N-Term(iTRAQ8plex); K14(iTRAQ8plex)	0.865667	1.06964	0.93867	1.01222	1.12395	1.03048	0	2.757e-12
gVLQGNAmVLPk	70	2	1	Q96318	N-Term(iTRAQ8plex); M8(Oxidation); K12(iTRAQ8plex)	0.829686	0.815308	0.847907	1.2358	1.26176	1.12761	0	2.772e-07
kAAQAAGASSGGAAGGk	1	1	1	Q8GXU7	N-Term(iTRAQ8plex); K1(iTRAQ8plex); K17(iTRAQ8plex)	0.791142	0.763334	0.777893	1.30019	1.43115	1.17325	0	1.033e-13
aSELGFFGF	4	4	1	O80774	N-Term(iTRAQ8plex)	1.2198	1.16539	1.19787	0.71863	0.827619	0.716842	0	6.814e-06
vEGAENPSSAGGYGSTVASMVTPVYEk	1	3	1	Q8RY15	N-Term(iTRAQ8plex); K27(iTRAQ8plex)	0.669968	0.804921	0.548623	1.31113	1.57755	1.39378	0	3.476e-12
sQTVVLR	1	1	1	Q94BT9	N-Term(Acetyl)							0	0.001701
fVEDLNEMLPk	12	3	1	Q9S7E4	N-Term(iTRAQ8plex); K11(iTRAQ8plex)	0.901259	0.948326	0.917545	1.0832	1.25052	0.998033	0	1.682e-11
eMIcQAVEQTHVDLLVVGSR	5	3	1	F4J5V2	N-Term(iTRAQ8plex); C4(Carbamidomethyl)	1.00891	1.08047	1.16456	0.909651	0.935069	0.909346	0	7.273e-14
dSILGLVLSSLPEEAR	1	2	1	Q9ASV5	N-Term(iTRAQ8plex)	1.11356	1.21945	0.984147	0.686569	0.723434	1.22153	0	2.192e-11
nMEGLVEVGEALLk	4	1	1	O23181	N-Term(iTRAQ8plex); K14(iTRAQ8plex)	1.04957	1.01788	1.14399	0.964004	1.00314	0.849745	0	2.61e-08
aSYGVNEEEAk	30	1	1	Q9ZWA9	N-Term(iTRAQ8plex); K11(iTRAQ8plex)	0.971075	1.06755	0.972047	1.02463	1.09484	0.910423	0	7.156e-11
qIQELVEAIVLPMTHk	2	2	1	Q9SEI2	N-Term(iTRAQ8plex); K16(iTRAQ8plex)	1.10975	1.1229	1.24885	0.842684	0.745099	0.866591	0	7.733e-12
eYFSNFGEVLQVTVMR	2	1	1	O22791	N-Term(iTRAQ8plex)	0.932666	0.77608	0.782733	1.16649	1.40652	1.10746	0	2.027e-08
sDEEGFGGIYGGNQTLQk	7	1	1	Q9FL02	N-Term(iTRAQ8plex); K18(iTRAQ8plex)	0.634981	0.708108	0.73921	1.2565	1.33712	1.39998	0	3.349e-15
aVAAAAMIGLPQAYLEGk	3	3	1	F4JYQ5	N-Term(Acetyl); K18(iTRAQ8plex)	1.06929	0.992926	0.939336	1.00534	1.06623	1.0461	0	1.774e-09
lSFVAVDYEQEMETSk	3	5	1	Q96292	N-Term(iTRAQ8plex); K16(iTRAQ8plex)	0.85427	0.874806	0.887649	1.15186	1.12343	0.973404	0	3.749e-10
tVVEFEEDDATNPIGPk	3	1	1	P15457	N-Term(iTRAQ8plex); K17(iTRAQ8plex)	0.690798	0.662866	0.73265	1.51678	1.42474	1.24445	0	1.251e-12
sSEEAMNDYITk	6	1	1	P57752	N-Term(iTRAQ8plex); K12(iTRAQ8plex)	0.704695	0.662811	0.653983	1.38929	1.61364	1.29631	0	3.61e-10
iGLLGASGYTGAEIVR	1	1	1	Q93Z70	N-Term(iTRAQ8plex)	1.14687	0.973682	1.03759	1.00107	0.837068	1.01454	0	5.378e-12
aLGIPETADEAEALGIIR	2	1	1	Q8LDW8	N-Term(iTRAQ8plex)	0.892833	0.907593	0.874094	1.11636	0.99787	1.29651	0	2.85e-08
aTQGIYPLQNVFIR	11	7	2	Q9CAV0;Q42262	N-Term(iTRAQ8plex)							0	1.869e-08
lAEMPADSGYPAYLAAR	2	3	1	O23654	N-Term(iTRAQ8plex)	0.861466	0.839437	0.833775	0.897372	1.07149	1.44726	0	5.743e-14
dAPMFVVGVNEHEYk	11	3	2	P25858;Q9FX54	N-Term(iTRAQ8plex); K15(iTRAQ8plex)							0	2.504e-10
aSSGDLDNTAIIDQILk	3	2	2	Q94AM1;Q949P2	N-Term(iTRAQ8plex); K17(iTRAQ8plex)							0	9.264e-10
hLAIEFLVTLAEAR	1	1	1	Q93VS8	N-Term(iTRAQ8plex)	1.28914	1.5531	0.916375	1.14864	0.462142	0.552576	0	1.597e-11
eGNFDLVGNNTPVFFIR	3	6	1	B9DHU0	N-Term(iTRAQ8plex)	1.13972	1.12963	1.10924	0.785845	0.945692	0.810622	0	7.734e-16
gIFWQEEIIPFFQNAk	5	1	1	Q9LFW1	N-Term(iTRAQ8plex); K16(iTRAQ8plex)	1.12545	1.07936	1.07061	0.913343	0.893761	0.796069	0	3.976e-11
vNNMVLFDQGTYDk	3	2	1	F4IHJ8	N-Term(iTRAQ8plex); K14(iTRAQ8plex)	0.91358	1.02384	0.949812	1.0134	1.12259	1.05074	0	5.493e-10
lLYMTGTGmSEDTALNk	5	2	1	P0DKC6	N-Term(iTRAQ8plex); M9(Oxidation); K17(iTRAQ8plex)	0.786889	1.05122	0.767798	1.22345	0.910027	0.908482	0	3.915e-09
eYGLIDGVIMNPLk	2	1	1	Q9S834	N-Term(iTRAQ8plex); K14(iTRAQ8plex)	1.05901	1.08682	1.10926	0.918451	0.936217	0.884119	0	1.422e-11
sQVSGYMGDDDLGk	2	2	1	Q9LKA3	N-Term(iTRAQ8plex); K14(iTRAQ8plex)	0.832222	0.758415	0.80307	1.26603	1.4545	1.0925	0	4.94e-12
sVLFAAVGTAGQR	6	1	1	Q9SYG7	N-Term(iTRAQ8plex)	0.996536	0.912478	0.979729	1.03228	1.04082	1.13642	0	7.375e-08
qIEEYGGQAITFGGDVSk	3	1	1	P33207	N-Term(iTRAQ8plex); K18(iTRAQ8plex)	1.02805	1.19425	0.994345	0.980583	1.05277	0.714158	0	5.802e-11
gFEGLTSLVDVGGGIGATLk	1	1	1	Q9FK25	N-Term(iTRAQ8plex); K20(iTRAQ8plex)	0.752795	0.769969	0.810398	1.11889	1.50426	1.26455	0	5.837e-13
mGVGVTAEAQSIFDALSk	1	3	1	Q9LR90	N-Term(iTRAQ8plex); K18(iTRAQ8plex)	1.11024	0.840358	0.897015	0.917505	1.07671	1.21821	0	1.584e-09
lLADEDPGLVGNLLVER	1	1	1	F4HYF3	N-Term(iTRAQ8plex)	1.21197	1.08126	1.10142	0.769808	0.880104	0.89977	0	3.906e-10
vGDQVcALLSGGGYAEk	1	3	1	A8MRW5	N-Term(iTRAQ8plex); C6(Carbamidomethyl); K17(iTRAQ8plex)	0.995199	0.971319	1.03375	1.01309	0.912755	1.12857	0	1.078e-10
vASTYSDVFTANILNEEQck	1	2	1	P30184	N-Term(iTRAQ8plex); C19(Carbamidomethyl); K20(iTRAQ8plex)	0.986468	0.914318	1.06979	1.12932	0.909741	1.06391	0	2.804e-10
lGSLAIAAALk	4	1	1	Q8S4Y1	N-Term(iTRAQ8plex); K11(iTRAQ8plex)	1.09396	1.16586	1.21413	0.815872	0.778922	0.867859	0	4.884e-10
lTGITGGDQVAAAMGIYGPR	1	1	1	P46283	N-Term(iTRAQ8plex)	0.917497	0.820069	0.902197	1.16459	1.14306	1.19803	0	1.499e-11
nLQAWAGLMGPDYNYFER	3	2	1	O65660	N-Term(iTRAQ8plex)	0.96263	1.07148	1.13066	1.13796	0.820383	1.02747	0	2.049e-11
aEQYLADSGTPYTIIR	4	1	1	Q94EG6	N-Term(iTRAQ8plex)	0.777693	0.891346	0.723642	1.22966	1.32739	1.14328	0	2.798e-11
lELELAEVEMPGLMAcR	1	7	1	O23255	N-Term(iTRAQ8plex); C16(Carbamidomethyl)	1.17993	1.24135	1.14598	0.725243	0.927821	0.702877	0	7.684e-13
aIVDEILPPVFLVR	2	3	1	Q8LDN5	N-Term(iTRAQ8plex)	1.25465	1.37806	1.11059	0.676502	0.796921	0.551928	0	1.277e-07
sQMDPDAVSk	2	2	1	Q9C7F5	N-Term(Acetyl); K10(iTRAQ8plex)	0.951631	0.809967	0.895005	1.37829	0.983942	1.10398	0	0.0001452
qAFDEAISELDTLGEESYk	2	2	2	P42645;Q96300	N-Term(iTRAQ8plex); K19(iTRAQ8plex)							0	8.796e-11
lcIIGLMGGANAEIk	2	3	1	A8MRW5	N-Term(iTRAQ8plex); C2(Carbamidomethyl); K15(iTRAQ8plex)	1.1395	0.953712	1.17449	0.949313	0.869278	0.866385	0	8.428e-12
wPYEAAAIAFEAIPR	3	1	1	Q84WV1	N-Term(iTRAQ8plex)	1.05908	1.00093	0.963962	0.98112	1.09715	0.885657	0	5.02e-11
aNVVIAAVGNSLEVEGSR	1	1	1	Q9FPF0	N-Term(iTRAQ8plex)	0.913793	0.956895	0.985954	1.10875	1.18378	0.963231	0	1.125e-13
yFLSAFWANDENVR	5	1	1	Q8VZU3	Y1(iTRAQ8plex)	1.17726	0.885157	1.1931	0.911192	0.678298	1.11708	0	1.539e-10
eQLGTEGYQQMGR	10	3	1	Q02973	N-Term(iTRAQ8plex)	0.736645	0.679927	0.74842	1.3275	1.30364	1.35451	0	1.017e-09
tQETAQSAQQk	6	2	1	Q96270	N-Term(iTRAQ8plex); K11(iTRAQ8plex)	0.578519	0.683392	0.578694	1.55358	1.58232	1.40952	0	1.744e-10
aFGVSVDFIDQELSR	3	1	1	Q93Y35	N-Term(iTRAQ8plex)	0.974298	0.757274	0.817647	1.04246	1.06405	1.38585	0	7.664e-11
vLNFAIDDAILEER	4	3	1	O82514	N-Term(iTRAQ8plex)	0.84899	0.890642	0.853367	1.18699	1.10294	1.2591	0	2.303e-08
gTVEIITPVELIk	3	4	1	Q42112	N-Term(iTRAQ8plex); K13(iTRAQ8plex)	1.06271	1.19356	1.21454	0.764967	1.01118	0.722673	0	6.468e-11
mAAFYAGFPETVAVR	6	1	1	Q56WD9	N-Term(iTRAQ8plex)	0.915497	0.865521	0.91814	1.17361	0.985109	1.21526	0	3.175e-10
nAAQTVTEAVVGPEEDAEk	8	1	1	Q9SUB2	N-Term(iTRAQ8plex); K19(iTRAQ8plex)	0.668965	0.737502	0.717794	1.38553	1.36591	1.39929	0	5.566e-13
gHYLNATAGTcEEMIk	2	7	2	O03042;A0A075M556	N-Term(iTRAQ8plex); C11(Carbamidomethyl); K16(iTRAQ8plex)							0	1.8e-13
dLYGNIVLSGGSTMFPGIADR	5	1	1	P53492	N-Term(iTRAQ8plex)	0.969836	0.934143	0.950877	1.02109	1.01917	1.17809	0	2.132e-13
tFMTNLVSWEAVSAR	5	2	1	F4JRV2	N-Term(iTRAQ8plex)	1.1031	1.06963	1.02389	1.10207	0.731433	1.06407	0	2.855e-13
qLVNEIISGENR	3	1	1	O82762	N-Term(iTRAQ8plex)	0.696211	0.656812	0.736661	1.35031	1.42662	1.3737	0	4.775e-08
gMALNLENENVGIVVFGGDTAIk	2	5	1	P92549	N-Term(iTRAQ8plex); K23(iTRAQ8plex)	1.01243	1.08077	1.13693	0.910728	1.00149	0.866242	0	2.796e-14
iDILVAGIGTGGTITGVGR	2	1	1	P47999	N-Term(iTRAQ8plex)	1.00153	0.998314	1.13038	0.882678	0.875709	1.09484	0	2.147e-09
qGMSAVFQQLSSGAVTSGLR	2	1	1	O65902	N-Term(iTRAQ8plex)	1.0762	0.995461	1.19041	0.959387	0.847161	0.913546	0	1.502e-11
qDISSFEGSEIYNQADAAGFIR	1	2	1	B3H778	N-Term(iTRAQ8plex)	0.864961	0.810852	0.888391	1.28618	1.14032	1.18671	0	5.564e-11
mDFSVVLEEVSATR	2	1	1	Q9ZVD5	N-Term(iTRAQ8plex)	1.00591	0.941834	1.1039	0.898192	0.902236	1.07248	0	4.983e-10
vLIQFEDFANHNAFELLAk	2	1	1	O82191	N-Term(iTRAQ8plex); K19(iTRAQ8plex)	0.966393	1.17272	1.02428	0.980717	1.06678	0.829475	0	1.099e-11
fTVIFDTGSSNLWIPSTk	2	2	1	F4JGD2	N-Term(iTRAQ8plex); K18(iTRAQ8plex)	1.0218	0.876877	0.776694	1.13166	1.15061	1.13521	0	2.085e-12
tFIEAFTEIMER	1	1	1	Q9FIX1	N-Term(iTRAQ8plex)	1.1267	1.21633	1.2484	0.749173	0.703273	0.869586	0	2.783e-10
iHYETTGPEIWEDTR	2	1	1	P47999	N-Term(iTRAQ8plex)	1.03699	0.937613	0.987645	1.04561	1.05963	0.996126	0	4.145e-09
sWPDLDMLPLGWLTDQGSNVGPHR	2	2	1	F4JCI4	N-Term(iTRAQ8plex)	0.971091	0.985894	1.05293	1.18757	0.907247	0.94463	0	9.461e-14
iQGVWYGQLE	4	2	2	P23321;Q9S841	N-Term(iTRAQ8plex)							0	1.403e-05
aTVPGQLIWEIVk	3	2	2	Q9M0E2;O82204	N-Term(Acetyl); K13(iTRAQ8plex)							0	0.0003247
gASFAVADATLLGAPVESLTLNQQVR	2	1	1	Q8W4H8	N-Term(iTRAQ8plex)	1.12768	0.969021	0.934561	1.1389	1.06427	0.824812	0	2.903e-16
PQLGYISTLNSYDLPILR	1	2	1	P15455								0	3.01e-09
iINSDEVQSVVNPIk	4	4	1	P49691	N-Term(iTRAQ8plex); K15(iTRAQ8plex)	1.02407	1.07606	1.04176	0.944488	1.05324	0.928469	0	9.311e-12
lAPTIGIAVDHR	4	2	1	A8MQA1	N-Term(iTRAQ8plex)	0.952578	1.03833	0.95335	0.998756	1.11223	0.98985	0	9.124e-09
TSGILGQTGEQVk	5	2	1	Q96270	K13(iTRAQ8plex)	0.619468	0.604783	0.533575	0.856459	2.17552	0.946218	0	1.738e-06
iQVGVFSATMPPEALEITR	7	9	2	P41376;P41377	N-Term(iTRAQ8plex)							0	8.632e-12
eLAEDGYSGVEVR	4	4	3	Q9SIP7;Q9M339;Q9FJA6	N-Term(iTRAQ8plex)							0	3.388e-09
iSQEVSGDALGEEFk	12	3	2	O48549;P51430	N-Term(iTRAQ8plex); K15(iTRAQ8plex)							0	6.583e-14
gAPAQLIEAMNTLESSIDGNLDR	1	1	1	Q8H1H8	N-Term(iTRAQ8plex)	0.820189	0.957114	1.09067	1.18193	0.951384	1.11392	0	7.821e-11
qAFEEAIAELDTLGEESYk	3	5	2	F4KGV2;P48348	N-Term(iTRAQ8plex); K19(iTRAQ8plex)							0	4.541e-11
iLISGGAGFIGSHLVDk	5	3	1	Q9FIE8	N-Term(iTRAQ8plex); K17(iTRAQ8plex)	1.09902	1.03837	1.0568	1.00939	0.943684	0.932977	0	1.99e-13
sAVSScEAYFEk	2	1	1	Q9CAR3	N-Term(iTRAQ8plex); C6(Carbamidomethyl); K12(iTRAQ8plex)	1.12534	1.2294	1.21491	0.785953	0.810334	0.747484	0	2.358e-08
sIYGLTTDEAVVAxEEAk	4	4	2	Q8LC43;P46422	N-Term(iTRAQ8plex); X14(E); K18(iTRAQ8plex)							0	5.783e-11
dNLTLWTSDMTDEAGDEIk	2	1	1	P42644	N-Term(iTRAQ8plex); K19(iTRAQ8plex)	1.06699	1.0684	0.93751	0.858283	1.12575	0.955121	0	7.434e-11
vNDEFLQcAVYASDR	2	1	1	Q9C7N3	N-Term(iTRAQ8plex); C8(Carbamidomethyl)	1.30331	1.08043	1.19647	0.806968	0.739224	0.766459	0	6.441e-11
vSGVSLLALFk	2	2	1	P49201	N-Term(iTRAQ8plex); K11(iTRAQ8plex)	1.18523	1.06427	1.14386	0.936929	0.8397	0.790386	0	5.01e-08
aIASNIDANFLk	3	3	1	Q9MAK9	N-Term(iTRAQ8plex); K12(iTRAQ8plex)	1.0159	1.02419	1.01043	0.915328	1.0668	0.943489	0	1.013e-08
aAEGGAAVEEYDYLPFFYSR	2	2	1	Q9LFA3	N-Term(iTRAQ8plex)	1.00381	0.933378	0.9062	1.05794	1.16782	1.00023	0	2.849e-12
sTPDMWEDLIQk	3	2	1	Q9SCV9	N-Term(iTRAQ8plex); K12(iTRAQ8plex)	1.13815	1.26381	1.18069	0.788496	0.882338	0.686149	0	2.184e-08
iSYVVQGTGISGR	142	2	1	Q96318	N-Term(iTRAQ8plex)	1.06314	1.05684	1.06716	0.965552	0.917339	0.950055	0	1.137e-06
tWSISPATGDVPNLScLGVR	1	1	1	O49326	N-Term(iTRAQ8plex); C16(Carbamidomethyl)	0.829344	1.16201	0.904401	1.02415	1.23999	0.952743	0	2.561e-13
qIGVIGWGSQGPAQAQNLR	2	2	1	Q05758	N-Term(iTRAQ8plex)	0.911036	1.07893	0.896788	1.09111	1.06996	1.02443	0	1.295e-10
yDDLVAAIETAR	7	1	1	Q9XFH8	Y1(iTRAQ8plex)	0.921578	1.04701	0.879907	1.1088	1.03505	1.07945	0	1.486e-07
fNTLETTLTHSSGPASyGR	43	2	1	P15455	N-Term(iTRAQ8plex); Y17(iTRAQ8plex)	0.87334	1.23286	0.966966	1.04655	0.845211	0.977226	0	1.43e-11
vNQAIFLITTGAR	12	2	2	P51427;Q9ZUT9	N-Term(iTRAQ8plex)							0	2.109e-08
sGDTIATTPGVAQWFyNDGQEPLVIVSVFDLASHQNQLDR	13	1	1	P15455	N-Term(iTRAQ8plex); Y16(iTRAQ8plex)	1.05556	0.940443	1.15472	1.11442	0.832001	0.996164	0	7.68e-17
vFSPEEISAMILTk	6	3	2	Q9LKR3;Q39043	N-Term(iTRAQ8plex); K14(iTRAQ8plex)							0	3.038e-09
fFDNAIGVNVPR	6	3	2	Q9M9P3;P57751	N-Term(iTRAQ8plex)							0	4.865e-11
vVYFVNSGSEANELAMMMAR	3	1	1	Q940M2	N-Term(iTRAQ8plex)	1.09585	1.12493	0.997249	0.998961	0.873031	1.00711	0	1.394e-09
aVFVDLEPTVIDEVR	2	5	1	Q56WH1	N-Term(iTRAQ8plex)	1.2341	1.03751	1.12491	0.851914	0.808453	0.887336	0	8.235e-10
fMETDELAYVATR	1	1	1	Q9ZPR0	N-Term(iTRAQ8plex)	0.95245	1.06575	0.969654	1.03665	1.15981	0.897044	0	3.878e-09
aEEQAATAMETSAVEk	3	5	1	F4J8J7	N-Term(Acetyl); K16(iTRAQ8plex)	0.95464	1.09475	1.02576	1.01609	1.09797	0.917887	0	9.206e-11
gLDFSALMDDVk	2	1	1	P46643	N-Term(iTRAQ8plex); K12(iTRAQ8plex)	0.974222	0.779534	0.934061	1.02058	1.28607	1.07223	0	6.726e-11
gYLQDMLALVER	3	1	1	Q9SUU5	N-Term(iTRAQ8plex)	0.824551	0.836567	0.774795	1.14752	1.34217	1.17338	0	1.055e-06
vVEGTAVTDPIGR	7	2	1	Q9FG31	N-Term(iTRAQ8plex)	0.674472	0.648229	0.689524	1.2676	1.45128	1.49526	0	6.53e-09
vALDTQSLEEDPDSGk	3	1	1	F4JVN6	N-Term(iTRAQ8plex); K16(iTRAQ8plex)	0.962838	1.06273	0.977212	1.02514	1.08785	1.04182	0	1.642e-11
vDAIQVAELR	1	1	1	Q8VWG7	N-Term(Acetyl)							0	4.181e-06
rEGGGGYGGGEGGGYGGSGGGGGW	3	3	1	Q03250	N-Term(iTRAQ8plex)	0.814787	0.81929	0.731812	1.23187	1.32948	1.26496	0	3.675e-14
kVLQFAGIDDVFTSSR	4	6	2	Q8L8Y0;P49688	N-Term(iTRAQ8plex); K1(iTRAQ8plex)							0	2.571e-14
aVVAQYNASQLITQR	2	3	3	Q9ZNT7;Q9SIL6;O49460	N-Term(iTRAQ8plex)							0	7.768e-10
vVDEVVNAFGR	21	1	1	Q9FZ42	N-Term(iTRAQ8plex)	0.96751	1.21661	0.935363	0.916952	1.00373	0.9461	0	1.673e-07
vIDLFSSPDVVk	10	3	2	P49200;Q9STY6	N-Term(iTRAQ8plex); K12(iTRAQ8plex)							0	2.214e-09
cEEVLLEFVEk	1	1	1	Q9FK91	N-Term(iTRAQ8plex); C1(Carbamidomethyl); K11(iTRAQ8plex)	1.19036	1.22675	1.25385	0.781108	0.708379	0.740039	0	1.731e-10
fTVIFDTGSSNLWVPSGk	6	1	1	Q8VYL3	N-Term(iTRAQ8plex); K18(iTRAQ8plex)	1.07236	1.14428	1.02108	0.875197	0.944845	0.904559	0	3.901e-13
aAVILAELAIAR	3	1	1	Q9T010	N-Term(iTRAQ8plex)	1.14897	1.2284	1.24807	0.791693	0.811641	0.608253	0	1.173e-07
eLVkDDAWLDGEFISTVQQR	8	2	1	P93819	N-Term(iTRAQ8plex); K4(iTRAQ8plex)	0.796592	0.846083	0.894916	1.25883	1.31029	1.06998	0	1.771e-14
sGVSLAVGPR	2	2	1	Q9C7F4	N-Term(Acetyl)							0	7.436e-07
aDHQQHQQQQQPIMR	7	1	1	Q494N8	N-Term(Acetyl)							0	7.082e-10
iAQLNSAIDDVSSQLk	3	1	1	Q9C7S3	N-Term(iTRAQ8plex); K16(iTRAQ8plex)	1.10696	1.04574	1.03347	0.962793	0.978404	0.932212	0	7.593e-12
vLDSGGLSPELSILR	2	4	1	F4J109	N-Term(iTRAQ8plex)	1.04217	1.12291	1.0834	0.841676	0.87077	1.02572	0	4.784e-09
mSGEVYQLDTETLVWER	2	1	1	Q93XW5	N-Term(iTRAQ8plex)	0.985488	0.880678	0.91201	1.15767	1.15429	1.02664	0	3.852e-10
qWYLSHYGVELGR	5	1	1	Q93VG5	N-Term(iTRAQ8plex)	0.956801	1.02621	1.01851	1.03811	0.902078	0.931129	0	9.172e-11
eAGSTMDVVAAQTk	4	2	1	P48491	N-Term(iTRAQ8plex); K14(iTRAQ8plex)	0.946963	1.17671	0.997373	0.876446	1.06665	0.904281	0	2.068e-12
nGVEEVLDLGPLSDFEk	4	2	2	Q9ZP06;Q9LKA3	N-Term(iTRAQ8plex); K17(iTRAQ8plex)							0	6.512e-12
gGSTAVTAILINcQk	2	1	1	Q9LDA7	N-Term(iTRAQ8plex); C13(Carbamidomethyl); K15(iTRAQ8plex)	1.19941	1.07336	1.18193	0.817637	0.826093	0.735139	0	7.112e-13
gSADEFSIGGPGGVAGASWPVFR	2	4	1	Q9C5Z1	N-Term(iTRAQ8plex)	0.973571	0.954988	1.00419	0.893626	0.755644	1.41396	0	2.106e-12
vENLYEGPLDDQYANAIR	3	1	1	Q9ASR1	N-Term(iTRAQ8plex)	1.01743	1.16286	1	1.04643	0.965947	0.864301	0	5.774e-14
aEGESEAAQLISDATAk	3	2	2	Q9LK25;O04331	N-Term(iTRAQ8plex); K17(iTRAQ8plex)							0	2.604e-11
tFAAVGVDPAIMGIGPAVAIPAAVk	3	1	1	Q56WD9	N-Term(iTRAQ8plex); K25(iTRAQ8plex)	0.944798	0.903697	0.942635	1.29031	1.17396	1.12845	0	9.994e-11
dTWLDSDLYT	1	1	1	Q9LSU9	N-Term(iTRAQ8plex)	1.21885	0.738288	0.860108	1.1495	1.01317	1.09859	0	9.775e-05
lASLADLYVNDAFGTAHR	3	3	2	F4I3L1;Q9LD57	N-Term(iTRAQ8plex)							0	1.452e-13
FDGILGLGFQEISVGk	4	3	1	O65390	K16(iTRAQ8plex)	1.03382	1.094	0.601848	0.743752	1.82141	0.75766	0	1.489e-08
iVQQMTEIIPGLQGDLPTk	6	1	1	Q8W112	N-Term(iTRAQ8plex); K19(iTRAQ8plex)	1.02888	1.35759	1.07289	0.828685	0.87521	0.802936	0	8.92e-12
sTIGGQILFLSGQVDDR	2	3	1	Q8L835	N-Term(iTRAQ8plex)	0.917879	1.03896	0.841039	1.07921	1.12054	1.10078	0	7.346e-11
fDYILTQQALVAVDSGAAINR	2	3	1	Q05758	N-Term(iTRAQ8plex)	1.11724	1.00297	1.09845	0.968515	0.922443	0.886849	0	6.5e-12
eIAEAYLGVTIk	3	2	1	P22953	N-Term(iTRAQ8plex); K12(iTRAQ8plex)	0.908684	0.974235	0.912309	1.06879	1.21054	1.00679	0	5.861e-11
aGSAPEGTQFDAR	3	4	1	P41376	N-Term(Acetyl)							0	1.773e-06
lIDVLAGATGk	7	1	1	Q9LJ97	N-Term(iTRAQ8plex); K11(iTRAQ8plex)	1.01288	0.989575	0.981594	1.03407	1.11682	0.942252	0	1.237e-07
lFTSQNYSYFAPTSR	15	1	1	Q9LUJ7	N-Term(iTRAQ8plex)	1.0381	0.976912	1.21002	1.01031	0.749412	0.967657	0	2.419e-12
gPGANAFESGSTFTSGQVTAk	1	1	1	O04575	N-Term(iTRAQ8plex); K21(iTRAQ8plex)	0.848613	0.850653	0.767998	1.24582	1.30952	1.17682	0	3.015e-10
sGDLPQPIMLDPGQEFTFTIER	1	1	1	Q9FLW9	N-Term(iTRAQ8plex)	1.00443	0.962355	1.10601	1.01131	0.932818	1.02676	0	5.658e-14
aIESDNLADTVSFADTFR	2	2	1	F4IYU3	N-Term(iTRAQ8plex)	0.998114	0.904882	0.901295	1.01149	1.22392	1.05702	0	9.544e-12
sLGADEVLDYk	3	1	1	Q9SV68	N-Term(iTRAQ8plex); K11(iTRAQ8plex)	0.737247	0.767081	0.692882	1.37565	1.48154	1.21208	0	3.391e-09
lVDATVLLHPAR	2	3	1	Q9LUH1	N-Term(iTRAQ8plex)	1.09074	0.912577	0.891365	0.992319	1.2167	0.957513	0	5.192e-11
fYTGETVYAFGDGLSYTk	4	1	1	Q9FLG1	N-Term(iTRAQ8plex); K18(iTRAQ8plex)	1.01061	1.07081	1.03237	0.992825	0.968953	0.956878	0	4.007e-12
tILNADVPEAIEAISk	2	1	1	F4HWQ8	N-Term(iTRAQ8plex); K16(iTRAQ8plex)	0.857259	0.809487	0.890509	1.11946	1.16093	1.29483	0	1.309e-09
cSGFAFER	1	1	1	P15456	C1(Carbamidomethyl)							0	0.000433
vPFAHGMGLISDELFESLER	6	1	1	Q8VZU3	N-Term(iTRAQ8plex)	1.151	1.12759	1.17345	0.752055	0.86401	0.841315	0	8.99e-15
vVAVLSHLGGGGLAEFAVATEk	9	1	1	Q9SV68	N-Term(iTRAQ8plex); K22(iTRAQ8plex)	0.725218	0.778064	0.807917	1.34252	1.3644	1.12741	0	2.682e-15
YHTVFDFGNEQVGFAEAV	6	1	1	Q8VYL3								0	4.294e-05
aSLEDIHGYR	10	3	1	Q9SIN3	N-Term(iTRAQ8plex)	0.843929	0.874106	0.926858	1.15336	1.06971	1.06018	0	1.506e-08
lAAEDLHDINk	9	2	1	Q9SKP0	N-Term(iTRAQ8plex); K11(iTRAQ8plex)	0.75887	0.745744	0.73449	1.31702	1.50233	1.20048	0	9.963e-11
aVLDTNFWGSVyTTR	7	1	1	P0DKC6	N-Term(iTRAQ8plex); Y12(iTRAQ8plex)	1.12849	1.0119	1.33617	1.00053	0.656887	0.909625	0	3.739e-11
gVMFGTEALLNEHGk	4	2	1	Q43314	N-Term(iTRAQ8plex); K15(iTRAQ8plex)	1.08134	1.04637	1.07728	0.977546	0.957476	0.851939	0	9.775e-15
yLDELTLNDNMWDDGNSLGPk	4	1	1	Q7DLR9	Y1(iTRAQ8plex); K21(iTRAQ8plex)	1.00038	1.06805	0.943848	0.962264	1.01333	1.02315	0	8.815e-12
lSELLGIEVVk	2	2	1	F4I3L1	N-Term(iTRAQ8plex); K11(iTRAQ8plex)	1.15541	1.197	1.24697	0.803933	0.71315	0.793716	0	1.583e-09
vAETPQESAEEIQSYAR	2	1	1	Q8LPJ4	N-Term(iTRAQ8plex)	0.941166	1.11347	0.985339	1.07808	0.999434	0.946145	0	4.281e-12
vcTDSTFLITATVDEAAPGLR	3	2	1	Q9SRH5	N-Term(iTRAQ8plex); C2(Carbamidomethyl)	1.32191	1.02805	1.35082	0.702648	0.731606	0.759348	0	5.388e-12
nLTGSSSVGWGGGVDR	1	1	1	Q8L733	N-Term(iTRAQ8plex)	1.00115	1.02568	1.14576	0.977131	0.792204	1.07598	0	4.342e-12
fYEAPEILVDSIDYTSLR	1	4	1	F4JNE4	N-Term(iTRAQ8plex)	1.04106	0.994599	0.94728	1.06207	0.919537	1.09608	0	2.577e-12
fSPTSIWELANFDETTk	3	1	1	Q9LMU2	N-Term(iTRAQ8plex); K17(iTRAQ8plex)	0.414128	0.393055	0.38336	1.66388	2.03662	1.62585	0	2.884e-10
sGSAADSQVVSDYVR	3	2	1	Q8LD27	N-Term(iTRAQ8plex)	1.07894	1.05577	1.00974	0.906351	0.887124	1.01359	0	1.381e-13
aAYALSEGLGVIAcIGEk	1	2	1	Q9SKP6	N-Term(iTRAQ8plex); C14(Carbamidomethyl); K18(iTRAQ8plex)	1.27314	1.11714	1.24906	0.706691	0.628998	0.904525	0	8.015e-12
fILVDVSEEEIELR	1	1	1	Q9LF46	N-Term(iTRAQ8plex)	1.21633	0.89681	1.10918	0.731095	1.05227	0.963779	0	5.808e-09
vGIALALkP	40	4	2	Q9SMX3;Q9SRH5	N-Term(iTRAQ8plex); K8(iTRAQ8plex)							0	7.295e-06
tNENAMISTLAGR	92	2	1	Q96318	N-Term(iTRAQ8plex)	0.870537	0.808348	0.868031	1.26294	1.04337	1.28534	0	6.242e-07
qFAAEEISAQVLR	7	2	2	Q9LTX9;Q9STW6	N-Term(iTRAQ8plex)							0	8.886e-09
lDATANDIPSDTFDVk	1	1	1	Q9SRG3	N-Term(iTRAQ8plex); K16(iTRAQ8plex)	0.995478	1.05306	1.11943	0.924712	1.09611	0.842472	0	2.663e-09
aAVGAPDHLGDcPFSQR	4	1	1	Q9FWR4	N-Term(iTRAQ8plex); C12(Carbamidomethyl)	1.06011	0.985725	1.1461	0.986263	0.884158	0.960825	0	7.367e-12
vTSVASFFVSR	2	1	1	Q9LYR4	N-Term(iTRAQ8plex)	1.02861	1.14631	1.11125	0.972642	0.708384	1.01823	0	2.386e-08
lFIGGLSWGTDDASLR	3	4	1	A8MSB9	N-Term(iTRAQ8plex)	0.752279	0.707063	0.885516	1.14952	1.28556	1.29858	0	1.597e-11
fMGAEGQVIGNVLVGNELSLSFDR	1	3	1	Q9C7Z0	N-Term(iTRAQ8plex)	1.4408	0.48588	0.840226	0.646135	1.2332	1.3578	0	1.684e-12
tSGILGQTGEQVk	11	2	1	Q96270	N-Term(iTRAQ8plex); K13(iTRAQ8plex)	0.579812	0.610743	0.653716	1.5449	1.27668	1.49144	0	4.247e-10
fFAESSGATLLTSTLk	1	1	1	Q9SG80	N-Term(iTRAQ8plex); K16(iTRAQ8plex)	1.09074	1.15731	0.98501	0.872748	0.862839	1.02611	0	1.473e-11
qALFDLAAFR	6	6	1	Q683B7	N-Term(iTRAQ8plex)	1.12438	1.27217	1.13828	0.835009	0.784536	0.794799	0	5.288e-07
lLDTILVPAAASGDSk	3	3	1	P42643	N-Term(iTRAQ8plex); K16(iTRAQ8plex)	0.94442	1.03629	1.00206	0.879053	0.952291	1.11965	0	4.613e-10
tVVSNNIAPASWSFGQTFTGR	3	1	1	O80622	N-Term(iTRAQ8plex)	0.931604	1.07912	0.822285	0.985483	0.950342	1.12092	0	2.027e-08
aAALNIVPTSTGAAk	9	6	3	P25857;P25856;Q9LPW0	N-Term(iTRAQ8plex); K15(iTRAQ8plex)							0	1.596e-08
iPLTESDLQFDLDR	2	3	1	P57720	N-Term(iTRAQ8plex)	0.94897	0.969374	0.884587	0.998735	1.27901	1.00141	0	5.234e-09
gGETSTNSIASIFAWTR	2	1	1	Q9SRZ6	N-Term(iTRAQ8plex)	1.02663	0.990404	0.867575	0.948246	1.04456	1.16865	0	1.181e-09
qISELGIYPAVDPLDSTSR	2	5	1	P83483	N-Term(iTRAQ8plex)	1.03113	1.01415	1.08365	1.01594	0.94358	0.930339	0	1.088e-09
xEESADFQMGVTNk	6	3	1	Q9FVT2	N-Term(iTRAQ8plex); X1(I); K14(iTRAQ8plex)	1.01354	1.11882	0.999115	0.876359	0.999196	1.00562	0	5.069e-11
kEFEDcISEGNLQILcSAESGcR	1	1	1	Q8VZK8	K1(iTRAQ8plex); N-Term(iTRAQ8plex); C6(Carbamidomethyl); C16(Carbamidomethyl); C22(Carbamidomethyl)	1.83448	0.770533	1.71029	0.460717	0.46184	0.435077	0	8.742e-15
VFDGQVSQGQLIAVPQGFSVVk	9	2	1	P15455	K22(iTRAQ8plex)	0.64813	0.800214	0.527167	0.892914	2.10391	0.8814	0	2.121e-05
sVADILGQ	2	1	1	Q9M812	N-Term(iTRAQ8plex)	0.965148	1.15081	1.05968	0.797676	0.932156	1.02513	0	0.0003663
vVAALGYDNGIFAPGR	3	2	1	Q9LV33	N-Term(iTRAQ8plex)	1.06633	1.15527	0.951845	1.06494	0.884398	0.879692	0	9.388e-11
dYFPAASQFQQSYFNGFTk	9	1	1	Q9LUJ7	N-Term(iTRAQ8plex); K19(iTRAQ8plex)	0.742406	0.819446	0.811382	1.27667	1.26615	1.3085	0	1.303e-09
tAGETGFEWISFk	42	1	1	Q9ZWA9	N-Term(iTRAQ8plex); K13(iTRAQ8plex)	0.984673	1.03017	1.03433	0.950002	1.04092	0.921004	0	5.881e-13
ySQVVSNALDMk	10	1	1	P34788	Y1(iTRAQ8plex); K12(iTRAQ8plex)	1.01951	1.0868	1.07813	0.94443	0.960104	0.906791	0	1.778e-12
qEEPVcVcPTLk	89	1	1	P15459	N-Term(iTRAQ8plex); C6(Carbamidomethyl); C8(Carbamidomethyl); K12(iTRAQ8plex)	1.10158	0.830583	1.21734	0.913374	1.05307	0.946287	0	2.75e-09
eIVSAYPVVVFSk	5	1	1	Q8L8T2	N-Term(iTRAQ8plex); K13(iTRAQ8plex)	0.915081	1.15655	1.00094	0.912234	1.10218	0.865043	0	1.787e-12
sAQDIALADLAPTHPIR	3	2	2	P42645;Q96300	N-Term(iTRAQ8plex)							0	6.823e-11
nLTEFGIVTQcMAPTR	2	1	1	Q9ZVD5	N-Term(iTRAQ8plex); C11(Carbamidomethyl)	1.02678	1.01121	1.10783	1.02831	0.845701	0.99912	0	2.789e-10
lLSGESGISLIDR	9	2	1	P52410	N-Term(iTRAQ8plex)	1.13782	1.10113	1.28767	0.848207	0.662872	0.791842	0	5.272e-09
aEDMAHGFk	3	4	1	Q3E8H9	N-Term(iTRAQ8plex); K9(iTRAQ8plex)	0.746403	0.688659	0.752305	1.24924	1.58407	1.24236	0	6.336e-08
nPTWATDALVEFEPk	9	1	1	Q9LIF9	N-Term(iTRAQ8plex); K15(iTRAQ8plex)	1.05169	1.16087	1.07618	0.888762	0.891858	0.891244	0	7.493e-15
dAMATVAPYAPVTYHR	15	1	1	O81270	N-Term(iTRAQ8plex)	1.11901	0.993725	1.07706	0.921568	0.96017	0.966451	0	1.518e-12
mPNPFVIGSGPPGTNYTVMk	1	1	1	Q9LVI9	N-Term(iTRAQ8plex); K20(iTRAQ8plex)	1.04197	0.953333	0.912096	0.946305	1.21824	1.00124	0	1.188e-09
mEGVESFDVDIk	3	1	1	Q94BT9	N-Term(iTRAQ8plex); K12(iTRAQ8plex)	0.93487	0.971036	0.984171	0.978537	1.14132	1.01162	0	1.734e-10
tSVPFEPVYSDGNASFVADYR	1	1	1	Q94AR8	N-Term(iTRAQ8plex)	1.1688	0.954724	0.946237	1.09451	0.913657	0.960569	0	1.389e-13
qFVIDVLHPGR	3	2	2	Q9SS17;Q8LC83	N-Term(iTRAQ8plex)							0	4.986e-09
nPDFLEQVSSHFGQSDNIIVGcQSGGR	1	2	1	Q39129	N-Term(iTRAQ8plex); C22(Carbamidomethyl)	0.695458	0.624729	0.556469	1.5977	1.39284	1.48008	0	1.058e-16
eIAEAFLGSPVk	7	1	1	Q9LHA8	N-Term(iTRAQ8plex); K12(iTRAQ8plex)	0.955796	1.0586	1.00278	0.93252	1.14446	0.949434	0	7.578e-11
gPLSLMSQAQSIYk	9	2	1	Q9FL43	N-Term(iTRAQ8plex); K14(iTRAQ8plex)	0.977082	1.03004	1.00068	0.962736	1.15424	0.919472	0	4.824e-13
gPSIWDAFVk	7	2	1	Q9LV33	N-Term(iTRAQ8plex); K10(iTRAQ8plex)	1.15924	1.16128	1.21839	0.776619	0.815143	0.773181	0	1.077e-06
gILDVcDAPLVSVDFR	2	1	1	P25857	N-Term(iTRAQ8plex); C6(Carbamidomethyl)	1.04431	1.02563	1.03221	0.892816	1.15838	0.803442	0	2.288e-12
eSLQWGLAAGLYSGITYGMTEVR	3	1	1	Q0WMZ5	N-Term(iTRAQ8plex)	0.769374	0.674519	0.732228	2.57132	1.0637	0.643716	0	1.094e-14
vVNSYWLNEDSTYk	1	2	1	O23515	N-Term(iTRAQ8plex); K14(iTRAQ8plex)	0.833248	1.0795	0.945839	1.10163	1.10487	1.05248	0	1.431e-12
aLSDAGLTVEDVHMVEVIGSGSR	1	1	1	Q9S7C0	N-Term(iTRAQ8plex)	0.96981	1.01766	1.00257	1.13621	1.01566	0.940642	0	1.509e-11
aTTELVAAGYk	3	1	1	Q9FKW8	N-Term(iTRAQ8plex); K11(iTRAQ8plex)	1.04261	1.07643	1.02705	1.02405	0.883517	0.957548	0	2.027e-08
AVSLQGQHGPFQSR	2	2	2	P15458;P15459								0	1.457e-07
lGDVVLGFDSVDPYVk	2	2	1	Q94BR8	N-Term(iTRAQ8plex); K16(iTRAQ8plex)	0.964061	0.92163	1.05869	0.917368	1.12852	1.062	0	1.415e-09
lQYLLGIDDSTATALR	3	1	1	Q8LPR9	N-Term(iTRAQ8plex)	1.03835	1.02634	1.11267	0.961715	0.774922	1.06193	0	2.826e-10
aEGGFLGADVILQQLk	3	1	1	O65396	N-Term(iTRAQ8plex); K16(iTRAQ8plex)	0.855561	0.964641	0.960811	0.969991	1.20906	0.94755	0	1.287e-10
vNGVAPGPIWTPLIPASFNEEk	5	1	1	Q9FZ42	N-Term(iTRAQ8plex); K22(iTRAQ8plex)	0.974438	1.08242	1.03193	1.02382	0.950089	1.00073	0	1.663e-14
sIPTIMDIYNLQDVVAPSQLR	4	1	1	Q9LHI0	N-Term(iTRAQ8plex)	0.97828	0.760485	0.838579	1.28028	1.43641	1.07086	0	1.141e-10
mADAVGYAGQk	31	1	1	Q39165	N-Term(iTRAQ8plex); K11(iTRAQ8plex)	1.08603	1.06545	1.17131	0.869283	0.919303	0.814111	0	5.833e-10
aILDGVDVLSLSLGGGSAPYYR	1	1	1	Q9ZUF6	N-Term(iTRAQ8plex)	0.762987	1.08282	1.00171	1.07908	1.08703	1.10817	0	3.544e-11
lTGDALEAFDQVNI	1	1	1	Q9ZV06	N-Term(iTRAQ8plex)	1.15517	0.887391	0.906866	1.14691	1.04911	0.925477	0	1.776e-07
iVVNASVENWLPLPR	3	1	1	Q9T0G0	N-Term(iTRAQ8plex)	1.02396	1.10093	1.01738	0.916803	1.01324	0.956853	0	1.24e-08
lkDSTDFVGINYYTSFFAk	5	1	1	Q9LIF9	N-Term(iTRAQ8plex); K2(iTRAQ8plex); K19(iTRAQ8plex)	1.02003	1.01543	1.20167	0.864369	1.12224	0.790872	0	3.94e-13
IEVWDHHAPQLR	8	2	2	P15455;P15456								0	1.851e-09
pGITLGDTVPNLEVETTHDk	9	1	1	O04005	N-Term(iTRAQ8plex); K20(iTRAQ8plex)	0.656947	0.785654	0.786128	1.50476	1.07825	1.47214	0	4.224e-12
dEMIDIIGVTk	5	6	1	P17094	N-Term(iTRAQ8plex); K11(iTRAQ8plex)	0.970193	1.02888	0.916048	0.967019	1.09755	1.07786	0	3.659e-10
sTcTINYGNELPLAQGINFG	2	1	1	Q9SYG7	N-Term(iTRAQ8plex); C3(Carbamidomethyl)	0.957808	0.980684	0.873678	1.01028	1.14111	1.10602	0	3.346e-08
lILGADSPAITESR	4	1	1	P46645	N-Term(iTRAQ8plex)	0.768324	0.824607	0.848113	1.12494	1.2943	1.23155	0	5.145e-11
vLQTITGVGLVSEVFSESk	3	1	1	Q9STG9	N-Term(iTRAQ8plex); K19(iTRAQ8plex)	1.08467	0.937359	0.864035	1.13594	1.02516	0.999857	0	6.567e-10
iSEEIcNSAAk	2	1	1	Q9LIK0	N-Term(iTRAQ8plex); C6(Carbamidomethyl); K11(iTRAQ8plex)	1.0919	1.17541	1.19384	0.86969	0.800426	0.8202	0	7.518e-11
sMENWAEENLLIHLk	3	2	1	O22832	N-Term(iTRAQ8plex); K15(iTRAQ8plex)	1.0412	1.02065	1.06422	1.01928	1.0218	0.873284	0	1.838e-11
aVEIMSQNLTALD	1	1	1	Q9M8M7	N-Term(iTRAQ8plex)	0.990419	0.891135	0.988328	1.05698	0.980765	1.17457	0	6.701e-05
vEIESLFDGVDLSEPLTR	4	2	1	Q39043	N-Term(iTRAQ8plex)	1.1229	1.10928	1.15998	0.768463	0.9528	0.880279	0	4.618e-10
dVLSVAFSLDNR	4	1	1	O24456	N-Term(iTRAQ8plex)	1.01862	1.03087	0.92468	1.10492	1.24148	0.860031	0	3.207e-08
lVQTMDYATIVFDTAPTGHTLR	1	3	1	Q9LPD0	N-Term(iTRAQ8plex)	0.85954	0.768438	0.774528	1.30493	1.14196	1.35404	0	6.341e-14
aNVVVAALGNSLEVVASR	2	1	1	Q9MAH3	N-Term(iTRAQ8plex)	1.13381	1.02498	1.09542	0.695415	0.640661	1.31164	0	2.41e-11
vATELGLWQEAFR	1	2	1	Q9LD55	N-Term(iTRAQ8plex)	1.10455	1.31617	0.99598	0.866894	0.758085	0.921934	0	1.606e-09
vIEIQAETPVSEAVk	3	1	1	Q9CAR3	N-Term(iTRAQ8plex); K15(iTRAQ8plex)	0.930049	0.874744	0.920478	1.05143	1.20723	1.03123	0	1.578e-10
gAAGALLVYDITR	4	2	2	P92963;Q38922	N-Term(iTRAQ8plex)							0	2.508e-07
vGADTHVLTVDISTGR	2	2	1	Q8L742	N-Term(iTRAQ8plex)	0.908655	0.850419	0.931827	1.03286	1.1981	1.18342	0	1.17e-13
lTGATTPSDEETR	9	1	1	Q9LF88	N-Term(iTRAQ8plex)	0.703753	0.667353	0.779451	1.39744	1.28959	1.40323	0	1.143e-09
lTTGQGLMQVDk	4	1	1	F4JVN6	N-Term(iTRAQ8plex); K12(iTRAQ8plex)	0.937565	1.15228	1.10774	0.931168	0.862294	0.915974	0	4.168e-10
aAQDVAVADLAPTHPIR	2	2	1	P48348	N-Term(iTRAQ8plex)	1.05787	0.800036	1.12016	1.09871	0.917556	1.0499	0	2.548e-11
mAPGIGGFGGLFPLGDSYLVAGTDGVGTk	1	1	1	Q05728	N-Term(iTRAQ8plex); K29(iTRAQ8plex)	0.962923	1.03686	0.910333	1.00381	1.25321	0.925262	0	5.445e-11
dLESAEQLSSQIGALFEEPQIYR	1	1	1	Q9LK23	N-Term(iTRAQ8plex)	1.01887	0.894132	0.909871	0.984072	1.00249	1.26883	0	1.698e-10
lASVPSGGGGGVAVASATSGGGGGGGAPAAESk	3	3	1	P51407	N-Term(iTRAQ8plex); K33(iTRAQ8plex)	0.977423	0.832304	1.03679	1.16378	0.902872	1.16279	0	5.682e-12
dSSWFGFYPDGEFEPLLSAQQTk	1	2	1	Q84W68	N-Term(iTRAQ8plex); K23(iTRAQ8plex)	0.927412	0.932412	1.05315	0.996741	1.32759	0.858424	0	1.238e-10
aMGSNIDVTFDcAGFNk	1	1	1	Q9FJ95	N-Term(iTRAQ8plex); C12(Carbamidomethyl); K17(iTRAQ8plex)	0.964067	0.893424	1.05845	1.13366	1.08096	0.963521	0	2.98e-10
fTEDFDFTAMNEk	3	1	1	Q9C658	N-Term(iTRAQ8plex); K13(iTRAQ8plex)	0.679292	0.743881	0.768878	1.30761	1.49607	1.32848	0	2.719e-08
vFIMDNcEDIIPEYLGFVk	3	4	2	P55737;P51818	N-Term(iTRAQ8plex); C7(Carbamidomethyl); K19(iTRAQ8plex)							0	1.139e-09
yFIGSVLSGGGSVPSEk	12	1	1	Q8W112	Y1(iTRAQ8plex); K17(iTRAQ8plex)	1.06812	1.08828	1.14793	0.924419	0.87574	0.812837	0	2.907e-14
vASIQNQLAALSLk	3	2	1	Q9FLT0	N-Term(iTRAQ8plex); K14(iTRAQ8plex)	0.977054	1.03072	1.02306	0.938683	0.938811	1.05799	0	1.195e-10
qIQDSVLEAILSR	2	4	2	Q9LYS0;Q8GZ29	N-Term(iTRAQ8plex)							0	1.413e-08
dTVIELEFQGIk	2	2	1	O23654	N-Term(iTRAQ8plex); K12(iTRAQ8plex)	0.832674	1.05074	0.921221	1.11142	1.18474	0.989058	0	4.807e-09
aGAVVSGIPLYk	5	2	1	P25696	N-Term(iTRAQ8plex); K12(iTRAQ8plex)	1.0569	1.16321	1.12739	0.873173	0.962069	0.826568	0	3.323e-08
vGEDEFGYMLANILk	4	1	1	Q9C524	N-Term(iTRAQ8plex); K15(iTRAQ8plex)	1.16283	1.12952	1.28963	0.774187	0.790497	0.719339	0	9.251e-10
vLMGVTSDELENLDAVEGNEYER	1	1	1	Q9FIX2	N-Term(iTRAQ8plex)	0.898274	0.809851	0.976085	1.09058	1.22572	1.13488	0	2.146e-14
eAADQSLEAYk	2	3	1	B9DFR1	N-Term(iTRAQ8plex); K11(iTRAQ8plex)	1.02707	1.05953	0.987007	0.913384	1.04168	0.996742	0	4.15e-10
aVDVIPLLTPIVLDk	8	2	1	O23016	N-Term(iTRAQ8plex); K15(iTRAQ8plex)	0.971261	1.24588	1.0875	0.909684	0.928172	0.812223	0	1.081e-10
tILSSETMDIPDSVTIk	5	2	1	P49209	N-Term(iTRAQ8plex); K17(iTRAQ8plex)	1.05096	1.10969	1.11895	0.888699	1.00087	0.803287	0	9.819e-12
sVVSIIDEYFSTGDVk	2	3	1	Q8LDN5	N-Term(iTRAQ8plex); K16(iTRAQ8plex)	1.03896	1.06095	1.00991	0.929414	1.09165	0.893436	0	1.315e-08
vYIGQGDSGVSYVk	4	1	1	Q9LIF8	N-Term(iTRAQ8plex); K14(iTRAQ8plex)	0.91083	1.02483	0.858139	1.08393	1.25134	0.890607	0	4.618e-12
tYQESLEGGMTVFcPGDDAMk	4	1	1	Q9FM65	N-Term(iTRAQ8plex); C14(Carbamidomethyl); K21(iTRAQ8plex)	0.940526	0.877304	0.958831	1.12398	1.11948	1.17186	0	4.899e-13
lADDTQGTVEAAk	3	1	1	Q9LYR4	N-Term(iTRAQ8plex); K13(iTRAQ8plex)	1.14777	1.18186	1.21631	0.82984	0.81954	0.720097	0	7.489e-11
aPNFVVELIQSSSk	1	13	1	Q8LDU4	N-Term(iTRAQ8plex); K14(iTRAQ8plex)	1.14665	1.19053	1.02427	0.958097	0.877119	0.786872	0	3.415e-08
aHEGPGQLSGGTFALDTETLk	4	1	1	O49326	N-Term(iTRAQ8plex); K21(iTRAQ8plex)	0.83461	1.04312	0.87874	1.02709	1.17669	1.09215	0	1.517e-12
cTENLDDPSDADVYKPSLGYISTLNSYNLPILR	16	1	1	P15456	N-Term(iTRAQ8plex); C1(Carbamidomethyl)	1.42848	1.13326	1.31818	0.613964	0.790317	0.613519	0	7.344e-06
qAVTNPTNTVSGTk	3	1	1	Q9LDZ0	N-Term(iTRAQ8plex); K14(iTRAQ8plex)	0.986657	0.804784	0.862542	0.952997	0.966949	1.09464	0	1.15e-09
eSGGGLGGmLHR	10	2	1	F4K0K7	N-Term(iTRAQ8plex); M9(Oxidation)	0.776595	0.778195	0.790785	1.28962	1.24428	1.25987	0	2.296e-10
nGTGGESIYGAk	3	1	1	Q42406	N-Term(iTRAQ8plex); K12(iTRAQ8plex)	0.751162	0.663853	0.816058	1.59674	1.2822	1.19989	0	4.227e-10
lPLGAPSLMMSPQDVNMGk	6	1	1	Q941A4	N-Term(iTRAQ8plex); K19(iTRAQ8plex)	1.069	1.21128	1.05542	0.776542	0.967549	0.813275	0	2.225e-08
dDAWLDGEFISTVQQR	4	2	1	P93819	N-Term(iTRAQ8plex)	0.955931	0.830233	0.929698	1.08322	1.15481	1.08995	0	1.162e-12
eAVTVQQcYIELSk	2	1	1	Q9LFW1	N-Term(iTRAQ8plex); C8(Carbamidomethyl); K14(iTRAQ8plex)	1.09399	1.14224	1.12659	0.874583	0.84644	0.874414	0	4.667e-10
vcQVIGAIVDVR	1	3	1	P83483	N-Term(iTRAQ8plex); C2(Carbamidomethyl)	1.36813	1.46866	1.54575	0.449952	0.345561	0.5406	0	2.078e-08
tGSYMSETGEAIk	18	3	1	Q96270	N-Term(iTRAQ8plex); K13(iTRAQ8plex)	0.736123	0.677315	0.691283	1.40883	1.3259	1.42015	0	3.256e-10
aQyYGQQHTGGEHDR	30	1	1	P29525	N-Term(iTRAQ8plex); Y3(iTRAQ8plex)	1.01152	1.39689	1.07084	0.812512	0.824919	0.800022	0	9.775e-07
lVSIEESPDGGFIGYLQVk	5	3	1	Q9S7Y7	N-Term(iTRAQ8plex); K19(iTRAQ8plex)	0.771202	0.779972	0.82571	1.20521	1.42825	1.23157	0	3.528e-09
aAGATWIQLDEPVLVMDLEGQk	3	1	1	O50008	N-Term(iTRAQ8plex); K22(iTRAQ8plex)	0.683859	0.968789	0.72464	1.27898	1.4602	1.12879	0	2.912e-12
aHIQMVNDNGER	21	1	1	P15456	N-Term(iTRAQ8plex)	0.999447	1.17677	1.02824	0.94151	0.951696	0.895075	0	4.43e-07
dGEWLYADSDGILISk	1	1	1	Q9FH13	N-Term(iTRAQ8plex); K16(iTRAQ8plex)	0.860792	0.964918	0.967591	1.09198	1.17682	1.06232	0	6.147e-09
yAILADDGVVk	32	1	1	Q949U7	N-Term(iTRAQ8plex); K11(iTRAQ8plex)	1.03929	1.16447	1.0907	0.871744	0.950468	0.818502	0	9.075e-09
aVDIIGFGTGAEVEk	2	1	1	P30184	N-Term(iTRAQ8plex); K15(iTRAQ8plex)	0.985172	1.18829	1.05694	0.908183	0.929548	0.921453	0	1.966e-11
tFNVFESEPDFESPYGR	17	1	1	F4JQG6	N-Term(iTRAQ8plex)	1.07962	1.14763	1.05573	0.902835	0.84635	0.893428	0	2.808e-13
gSHLVPLIGIDVWEHAYYPQYk	5	1	1	Q9LYK8	N-Term(iTRAQ8plex); K22(iTRAQ8plex)	0.885353	1.41481	0.929789	0.850119	1.20515	0.72042	0	2.842e-17
vAANDGDGVSk	4	1	1	Q41916	N-Term(iTRAQ8plex); K11(iTRAQ8plex)	0.797833	0.829861	0.830972	1.23856	1.389	1.08017	0	3.396e-05
lAGSTFMEYLPMGGSAk	3	1	1	P46643	N-Term(iTRAQ8plex); K17(iTRAQ8plex)	0.825658	0.863846	0.851597	1.21658	1.2125	1.21053	0	6.972e-13
nVMPFVQEAIDGIEFAR	2	1	1	Q8VZR2	N-Term(iTRAQ8plex)	1.30071	1.10484	1.35115	0.759354	0.677409	0.666486	0	4.264e-11
lASINVENVETNR	3	1	1	Q9LF98	N-Term(iTRAQ8plex)	1.08519	1.14961	1.16842	0.844497	0.850412	0.896953	0	3.408e-10
aGSAYDNAGYAk	3	3	1	Q6NKU0	N-Term(iTRAQ8plex); K12(iTRAQ8plex)	0.58346	0.707702	0.64545	1.3217	1.81169	1.28787	0	2.28e-08
mANVSEDASETk	3	1	1	P57751	N-Term(iTRAQ8plex); K12(iTRAQ8plex)	1.18804	1.09621	1.30183	0.718534	0.901391	0.829952	0	3.114e-10
fMLEEGAEMQWk	7	1	1	Q9T0G0	N-Term(iTRAQ8plex); K12(iTRAQ8plex)	0.861224	1.05277	0.879834	1.02397	1.21625	1.06743	0	1.622e-08
gGGGGGGQGGHk	10	2	1	Q9SL09	N-Term(iTRAQ8plex); K12(iTRAQ8plex)	0.579665	0.611858	0.586379	1.38259	1.88998	1.2714	0	9.446e-10
sDDSVDYIVTGSWGDk	1	1	1	Q9SHP0	N-Term(iTRAQ8plex); K16(iTRAQ8plex)	0.876003	0.8838	0.915359	1.13399	1.21598	1.12109	0	2.068e-09
dATNDFEDVGHSDTAR	2	1	1	Q42342	N-Term(iTRAQ8plex)	0.98128	0.950191	0.960822	0.932021	1.16732	1.06042	0	1.385e-14
vNNAGVANALIQHEWRPk	3	1	1	Q9SMX3	N-Term(iTRAQ8plex); K18(iTRAQ8plex)	1.00768	1.0418	1.00314	0.940381	1.0167	0.922396	0	6.899e-13
vEEGDIFAVPR	5	1	1	F4JQG6	N-Term(iTRAQ8plex)	1.0551	1.2077	0.958898	1.02137	0.982888	0.82446	0	4.653e-07
iTFGDTNLAIFR	2	1	1	Q8GWP4	N-Term(iTRAQ8plex)	0.764762	0.741698	0.813206	1.25414	1.33847	1.30591	0	1.162e-08
hMNLVLGDcEEFR	2	5	1	Q67ZP4	N-Term(iTRAQ8plex); C9(Carbamidomethyl)	0.94673	1.12291	0.92309	0.98452	1.1031	0.928265	0	1.821e-08
tFSQFGDVIDSk	7	7	1	Q03251	N-Term(iTRAQ8plex); K12(iTRAQ8plex)	0.775547	0.829565	0.821673	1.27594	1.25384	1.23756	0	2.155e-11
sSISSNTSSEck	4	1	1	F4JQG6	N-Term(iTRAQ8plex); C11(Carbamidomethyl); K12(iTRAQ8plex)	0.958889	1.30898	1.00067	0.847472	0.999477	0.855671	0	6.02e-08
sVIVDFIHSLNSk	6	1	1	Q9FE06	N-Term(iTRAQ8plex); K13(iTRAQ8plex)	0.870259	1.15588	0.997049	1.03966	1.03062	1.0066	0	1.377e-08
aGLQYVGPDLDAMk	3	1	1	Q9LP45	N-Term(iTRAQ8plex); K14(iTRAQ8plex)	0.779612	1.19607	1.08331	0.842166	0.789963	1.19774	0	5.553e-07
iSDDYSSLEQVTEALAR	1	1	1	Q9LY87	N-Term(iTRAQ8plex)	1.29264	0.819951	1.01335	0.757625	0.864863	1.21829	0	1.15e-11
mLDAVLVNMNMHGR	2	2	1	Q39172	N-Term(iTRAQ8plex)	1.10934	1.02848	1.10001	0.994742	0.875206	0.880571	0	1.884e-10
sASGNVVVYEGDR	5	3	2	Q9XI01;Q9SRG3	N-Term(iTRAQ8plex)							0	8.736e-08
fVIGGPHGDAGLTGR	2	5	2	P23686;Q9SJL8	N-Term(iTRAQ8plex)							0	1.289e-10
vIDITPGPNAMWTYAVk	2	1	1	Q9SV68	N-Term(iTRAQ8plex); K17(iTRAQ8plex)	0.723723	0.660196	0.691595	1.30979	1.65842	1.24106	0	1.137e-08
sDIVEDIYLWR	3	1	1	O64837	N-Term(iTRAQ8plex)	1.10764	0.999201	1.03616	1.00534	1.11503	0.931884	0	3.458e-07
nEDINSPNLGETVSEk	7	3	1	Q9ZRT9	N-Term(iTRAQ8plex); K16(iTRAQ8plex)	0.634824	0.662014	0.688896	1.3878	1.35188	1.62998	0	1.023e-17
tYISGDQLSVDDVk	5	2	2	Q9SCX3;Q84WM9	N-Term(iTRAQ8plex); K14(iTRAQ8plex)							0	3.15e-08
dPEGGEIVFGGVDPk	5	2	1	F4JGD2	N-Term(iTRAQ8plex); K15(iTRAQ8plex)	0.897977	0.981546	0.983626	1.09855	1.19874	0.977257	0	2.957e-09
fAPTTSPLSIEk	6	1	1	O48646	N-Term(iTRAQ8plex); K12(iTRAQ8plex)	0.754486	0.802171	0.797656	1.21529	1.47985	1.22979	0	2.039e-09
aVIELENYGLPFSR	2	2	1	O82663	N-Term(iTRAQ8plex)	1.13651	0.948089	1.04824	0.928238	0.962431	0.978191	0	2.086e-11
gNVQPDAVLQTVTk	5	1	1	Q94BT9	N-Term(iTRAQ8plex); K14(iTRAQ8plex)	0.979185	1.07613	1.05906	0.950164	1.03329	0.882107	0	1.159e-09
vINALANPIDGR	4	1	1	P56757	N-Term(iTRAQ8plex)	1.07932	1.10515	1.10972	0.843486	0.841757	0.915324	0	7.365e-10
nSFDALEWAVDHLR	4	3	1	F4J5V2	N-Term(iTRAQ8plex)	1.01311	1.072	0.991925	0.93611	0.923422	1.06104	0	7.142e-11
aIQTIDADIAQQLLLR	1	3	1	F4HVV7	N-Term(iTRAQ8plex)	0.935621	0.940248	1.08252	0.861594	0.935558	1.29123	0	4.416e-11
kIDTVLGGFDASNYVTER	1	2	1	Q9SX53	N-Term(iTRAQ8plex); K1(iTRAQ8plex)	0.843496	1.00185	0.972707	1.02008	0.983647	1.28043	0	3.253e-14
yFIGEIDSSSVPATR	6	1	1	Q42342	Y1(iTRAQ8plex)	0.912153	0.976276	0.947969	1.05099	1.05572	1.04876	0	6.009e-10
aWYQTMISDSDYTEFDNFTk	1	4	1	P49691	N-Term(iTRAQ8plex); K20(iTRAQ8plex)	0.897427	1.06429	0.988289	0.961775	1.28226	0.895463	0	3.739e-10
gAVDLGIAVEk	2	1	1	Q9SPK5	N-Term(iTRAQ8plex); K11(iTRAQ8plex)	1.15315	1.09357	1.06177	0.854995	1.03318	0.78494	0	5.652e-10
tVDLTGTPDQISk	2	1	1	O82762	N-Term(iTRAQ8plex); K13(iTRAQ8plex)	0.800166	0.728651	0.811136	1.25808	1.42264	1.17325	0	1.31e-07
eLDYLVGAVANPk	10	3	1	Q9SAJ4	N-Term(iTRAQ8plex); K13(iTRAQ8plex)	1.10394	1.1142	1.12381	0.842675	0.87871	0.849093	0	1.091e-08
eFGITVEAVVDAAk	4	2	1	F4JBY2	N-Term(iTRAQ8plex); K14(iTRAQ8plex)	1.14609	1.10911	1.08619	0.875526	0.91513	0.803854	0	2.598e-11
hFEVDLGEFR	3	1	1	Q39085	N-Term(iTRAQ8plex)	1.04745	1.07245	1.00382	0.942736	0.930359	0.973791	0	5.968e-07
qNNIFNGFAPEILAQAFk	11	1	1	P15456	N-Term(iTRAQ8plex); K18(iTRAQ8plex)	0.669391	0.898161	0.725292	1.37453	1.30005	1.26144	0	4.973e-10
dIVAQIVSASIAGDIVk	3	2	2	P49227;Q8LBI1	N-Term(iTRAQ8plex); K17(iTRAQ8plex)							0	2.388e-10
nSYDLIVLPGGLGGAEAFASSEk	3	2	1	Q9MAH3	N-Term(iTRAQ8plex); K23(iTRAQ8plex)	0.9222	1.04945	0.907722	1.0641	1.14413	1.01441	0	3.791e-12
mMQSAETHVFGHTQk	4	1	1	Q9LJ95	N-Term(iTRAQ8plex); K15(iTRAQ8plex)	0.684496	0.698614	0.671059	1.42546	1.54365	1.28019	0	1.218e-13
dYMESSPAAELVk	1	1	1	Q5GM68	N-Term(iTRAQ8plex); K13(iTRAQ8plex)	0.942761	1.08608	1.02088	0.983618	1.07562	0.952506	0	2.082e-06
nHNADEAVDFyHR	4	1	1	Q9LIF9	N-Term(iTRAQ8plex); Y11(iTRAQ8plex)	1.01703	1.04326	1.12187	1.01855	0.907568	0.940975	0	8.001e-11
aIFDGQGSLAWk	2	6	1	P49063	N-Term(iTRAQ8plex); K12(iTRAQ8plex)	0.961551	1.06458	0.974752	1.06363	1.01621	0.920902	0	1.808e-07
aVDGIFHVLR	4	1	1	Q9SA73	N-Term(iTRAQ8plex)	1.03921	1.07032	1.26745	0.851874	0.896485	0.836387	0	6.839e-08
iQLQSISASLASLTR	1	1	1	Q9T074	N-Term(iTRAQ8plex)	1.01011	0.876637	1.14	0.893228	0.860274	1.24715	0	1.882e-11
tVEGYSDIIVMR	1	1	1	P49077	N-Term(iTRAQ8plex)	1.12236	1.03986	0.906035	0.919324	1.10392	0.942207	0	8.645e-08
iGEPGQTHEDLAASLPADEcR	1	2	1	Q9ZSK4	N-Term(iTRAQ8plex); C20(Carbamidomethyl)	1.18078	1.00567	1.24607	0.85565	0.864416	0.797243	0	1.925e-13
tLGATHIVNAAk	1	4	1	Q9FFQ2	N-Term(iTRAQ8plex); K12(iTRAQ8plex)	1.08319	1.04542	1.24588	0.850828	0.898643	0.84626	0	5.29e-12
fETVVSGETQVVSGTNYR	3	1	1	Q41916	N-Term(iTRAQ8plex)	0.929415	0.859188	0.887905	1.15211	0.899421	1.17374	0	4.023e-12
vVIGPATVGGIQAGAFk	2	1	1	Q9FGX1	N-Term(iTRAQ8plex); K17(iTRAQ8plex)	0.981218	0.926291	1.03479	0.99352	1.07575	1.05226	0	2.934e-08
yDDLSEQSFYMVGGIDEVVAk	4	5	1	P83483	N-Term(iTRAQ8plex); K21(iTRAQ8plex)	0.999948	0.899313	0.979915	1.01811	1.0586	1.10921	0	9.808e-12
vVNFSFDGQPAELk	1	1	1	Q9SIB9	N-Term(iTRAQ8plex); K14(iTRAQ8plex)	1.07279	1.11313	1.15885	0.858936	0.936167	0.841117	0	7.441e-09
iHENIDDPER	25	1	1	Q9ZWA9	N-Term(iTRAQ8plex)	1.02268	0.952092	0.966815	1.02144	0.980782	1.05861	0	7.401e-07
sMPELSDGYSIVGLSQGNMIGR	1	2	1	Q8LAH5	N-Term(iTRAQ8plex)	0.895488	0.88807	0.849557	1.29993	1.14763	1.08813	0	6.472e-10
vTLNVYDLSQGLAR	2	1	1	Q9SFT9	N-Term(iTRAQ8plex)	0.867933	0.823153	0.806086	1.2162	1.28559	1.16529	0	2.391e-07
iNPLVPVDLVIDHSVQVDVAR	4	3	2	Q42560;Q9SIB9	N-Term(iTRAQ8plex)							0	5.982e-12
lAAVDGSWFGAWGLEk	1	1	1	Q9SJD4	N-Term(iTRAQ8plex); K16(iTRAQ8plex)	1.12951	0.976874	0.971591	0.951684	1.08339	0.919739	0	1.186e-07
gFLGQPQLEEALTGMDLVIIPAGVPR	1	1	1	O82399	N-Term(iTRAQ8plex)	1.28935	1.29425	0.619354	0.786316	0.75112	1.22615	0	3.106e-08
cVGVSVAR	39	2	1	Q96318	N-Term(iTRAQ8plex); C1(Carbamidomethyl)	1.24938	1.1487	1.25158	0.781727	0.697953	0.747067	0	3.03e-05
aIGSGSEGADSSLQEQFNk	1	2	2	O81149;Q42134	N-Term(iTRAQ8plex); K19(iTRAQ8plex)							0	1.442e-10
gSELVVFPEAFIGGYPR	6	2	1	O04907	N-Term(iTRAQ8plex)	1.19136	0.962257	1.08411	0.875608	0.947837	0.879038	0	5.016e-13
nISELEALANAEVEk	3	1	1	O23144	N-Term(iTRAQ8plex); K15(iTRAQ8plex)	1.05753	0.978565	1.06243	0.99027	1.07071	1.07493	0	1.634e-09
sYSDEGFGPIPSSWk	2	1	1	O65351	N-Term(iTRAQ8plex); K15(iTRAQ8plex)	0.804414	0.955467	0.825256	1.21344	1.31339	1.05306	0	1.198e-09
vANILYLEAPAGSGYSYAk	2	1	1	Q8VZU3	N-Term(iTRAQ8plex); K19(iTRAQ8plex)	1.0191	1.08397	0.971997	1.00292	0.99369	0.972275	0	1.009e-09
eAAELAAESPQGILR	3	2	2	Q0WLB5;Q0WNJ6	N-Term(iTRAQ8plex)							0	1.043e-09
lADVLELVGIPk	2	2	1	Q9S850	N-Term(iTRAQ8plex); K12(iTRAQ8plex)	1.22392	1.31485	1.28091	0.679997	0.746525	0.598056	0	8.274e-08
eLLQQEPGIAQQIMSMSM	1	3	1	F4IL65	N-Term(iTRAQ8plex)	0.948758	0.933196	0.810954	1.02059	1.21024	1.19905	0	2.322e-06
YLSTVLFDATR	1	2	1	P47998								0	0.0001793
tAQMEEETYk	9	1	1	Q9FGT8	N-Term(iTRAQ8plex); K10(iTRAQ8plex)	0.76438	0.788453	0.823373	1.27306	1.34838	1.1337	0	1.626e-09
vSVGDVFWIPR	20	1	1	Q9SK09	N-Term(iTRAQ8plex)	0.731185	0.700878	0.72415	1.27957	1.51379	1.36098	0	1.86e-06
fIDIPEEVLEIYk	3	1	1	Q9FFW8	N-Term(iTRAQ8plex); K13(iTRAQ8plex)	1.16671	1.00075	1.05594	0.970662	0.917303	0.859899	0	9.959e-12
nTALAYLASLEDPAYMELALNEYk	1	5	1	Q8H0S9	N-Term(iTRAQ8plex); K24(iTRAQ8plex)	0.947823	1.05881	1.05598	1.04267	0.932772	1.01946	0	9.374e-13
dYADILQHLVER	1	1	1	Q9LF04	N-Term(iTRAQ8plex)	1.12402	1.2445	1.18139	0.847628	0.912663	0.636284	0	1.414e-08
vIIGPATVGGVQAGAFk	2	1	1	Q9C522	N-Term(iTRAQ8plex); K17(iTRAQ8plex)	1.05462	1.02156	1.02853	0.812695	1.06329	1.02134	0	2.911e-08
vGGELLNALGAYFAPSSGR	3	1	1	Q9LIF8	N-Term(iTRAQ8plex)	1.06479	0.963597	1.00207	1.03791	1.01104	0.998583	0	2.088e-16
vIPAGSSSSFGk	3	2	1	P16181	N-Term(iTRAQ8plex); K12(iTRAQ8plex)	0.98166	1.0347	1.04195	0.995619	0.995162	0.996409	0	2.552e-07
aHLLFDFHQEVDGLR	2	2	1	Q8LEZ6	N-Term(iTRAQ8plex)	1.16773	1.22277	1.01167	0.762926	0.828316	0.948369	0	1.797e-09
yGSWAIITGPTDGIGk	4	1	1	Q8L9C4	N-Term(iTRAQ8plex); K16(iTRAQ8plex)	0.982759	1.33543	0.989004	0.937708	0.913208	0.850007	0	5.6e-11
eGSSIINTTSVNAYk	11	1	1	Q9FZ42	N-Term(iTRAQ8plex); K15(iTRAQ8plex)	0.814012	1.09318	0.861781	1.08732	1.109	0.983936	0	4.906e-15
rTQDGGTEVVEAk	3	3	2	Q9ZP06;Q9LKA3	N-Term(iTRAQ8plex); K13(iTRAQ8plex)							0	2.791e-10
lxIQNQDEMIk	32	5	3	P31167;P40941;O49447	N-Term(iTRAQ8plex); X2(I); K11(iTRAQ8plex)							0	1.445e-08
vAYALAQGLk	9	1	1	P48491	N-Term(iTRAQ8plex); K10(iTRAQ8plex)	0.98568	1.04543	0.968964	1.01877	1.14862	1.03345	0	1.02e-08
eSTDVEDLFIAHISGMDTMAR	1	4	1	Q9FKK7	N-Term(iTRAQ8plex)	0.909537	0.818777	0.987978	1.22488	1.18026	1.02354	0	4.195e-15
gLVPLVGSNNESWcQGLDGLSSR	1	2	1	Q944G9	N-Term(iTRAQ8plex); C14(Carbamidomethyl)	0.972484	1.01746	0.896415	1.03825	1.09936	1.06584	0	1.481e-12
nFVETIELQIGLk	3	1	1	Q8VZB9	N-Term(iTRAQ8plex); K13(iTRAQ8plex)	1.11838	1.12132	1.15479	0.819166	0.814207	0.901701	0	5.194e-12
nVTILDQSPHQLAk	1	2	1	C0Z2G4	N-Term(iTRAQ8plex); K14(iTRAQ8plex)	1.0194	1.07528	1.09212	1.08129	0.892551	0.874832	0	7.485e-11
wENPLMGWTSTGDPYANVGDSALAFDSEEAAk	1	1	1	Q9FJW4	N-Term(iTRAQ8plex); K32(iTRAQ8plex)	0.538601	0.455257	0.631046	1.56615	1.88362	1.34524	0	2.486e-10
gVEDLHQQTGGEVk	5	1	1	Q9LDN8	N-Term(iTRAQ8plex); K14(iTRAQ8plex)	0.627433	0.762052	0.675351	1.18618	1.72986	1.07106	0	7.652e-12
TNENAmISTLAGR	9	2	1	Q96318	M6(Oxidation)							0	1.494e-06
vYFDMTIDGQPAGR	24	1	1	P34790	N-Term(iTRAQ8plex)	0.79338	0.790503	0.814457	1.27244	1.28137	1.24791	0	3.326e-09
eGINIFLAGFVPTENLR	2	1	1	Q8LPJ4	N-Term(iTRAQ8plex)	1.29356	0.881255	1.01825	0.91843	0.778213	1.06379	0	6.695e-13
fNDEFMSQYADNFGYSR	2	1	1	Q9S7E9	N-Term(iTRAQ8plex)	0.990448	0.965746	0.9999	1.03068	0.971547	1.04019	0	1.141e-11
gMDLLVAEFEk	4	2	1	Q9SJ12	N-Term(iTRAQ8plex); K11(iTRAQ8plex)	0.82154	0.809592	0.839648	1.03294	1.27728	1.13912	0	8.165e-10
dSVVAGFQWASk	5	3	2	Q9ASR1;F4JB05	N-Term(iTRAQ8plex); K12(iTRAQ8plex)							0	3.751e-13
aFVVHELkDDLGk	5	1	1	O78310	N-Term(iTRAQ8plex); K8(iTRAQ8plex); K13(iTRAQ8plex)	0.767481	0.720706	0.865451	1.29435	1.59115	1.06567	0	5.366e-11
aAFPNLNSxAGLk	10	3	1	P48006	N-Term(Acetyl); X9(D); K13(iTRAQ8plex)	1.00276	1.07087	0.983354	0.897327	1.06006	0.959222	0	8.267e-06
fDSGcGWPAFFDGLPGAITR	5	1	1	Q9C5C8	N-Term(iTRAQ8plex); C5(Carbamidomethyl)	1.06163	0.765756	0.918019	1.2762	0.886404	1.15927	0	2.417e-12
hAIGEQFEWIEFk	147	1	1	P15456	N-Term(iTRAQ8plex); K13(iTRAQ8plex)	1.11594	1.1203	1.1363	0.85663	0.964068	0.7844	0	4.739e-12
aMQELFALPTEAk	2	6	1	Q944X1	N-Term(iTRAQ8plex); K13(iTRAQ8plex)	1.10038	1.15626	1.12161	0.866025	0.933413	0.797024	0	5.394e-10
sAQDIANAELAPTHPIR	1	1	1	Q01525	N-Term(iTRAQ8plex)	0.948801	1.05427	0.986794	0.973942	1.18608	0.924386	0	8.126e-10
fAAGNAGVAGFDVIDEAk	1	1	1	O49293	N-Term(iTRAQ8plex); K18(iTRAQ8plex)	0.969128	0.792623	0.987337	1.11491	1.08493	1.16441	0	5.979e-11
lAIGDLATQYFADR	3	1	1	Q9SF16	N-Term(iTRAQ8plex)	1.01471	1.19531	0.935691	0.954016	1.00891	0.887811	0	8.432e-11
hIANLAGNPk	7	2	1	P25696	N-Term(iTRAQ8plex); K10(iTRAQ8plex)	1.07157	1.168	1.09769	0.864058	0.878664	0.910289	0	2.037e-07
hAELLAAGGEEMR	3	3	1	Q9SIN3	N-Term(iTRAQ8plex)	0.890029	1.09854	0.899415	1.15399	0.990322	1.02933	0	8.58e-10
tASLPDLPYAYDALEPAISEEIMR	11	1	1	Q9LYK8	N-Term(iTRAQ8plex)	1.27552	1.14794	1.21871	0.638228	0.872254	0.974675	0	5.638e-09
fEAGQmEVWDHMSPELR	10	1	1	Q9ZWA9	N-Term(iTRAQ8plex); M6(Oxidation)	0.833892	0.872802	0.829278	1.30132	1.1805	1.11592	0	8.313e-09
eIYDQYGEDALk	2	3	1	F4J1V2	N-Term(iTRAQ8plex); K12(iTRAQ8plex)	0.928469	0.961685	1.00853	1.06121	1.14199	0.98622	0	1.558e-09
rAGQHIPEELEEAk	4	1	1	Q9SS98	N-Term(iTRAQ8plex); K14(iTRAQ8plex)	1.16369	1.05114	1.41487	0.827194	0.777793	0.687374	0	2.333e-09
iAAGAEVVESGTGk	1	1	1	Q8L733	N-Term(iTRAQ8plex); K14(iTRAQ8plex)	1.03332	1.17134	1.24698	0.761746	0.931223	0.812545	0	1.544e-13
IGGIGTVPVGR	2	4	1	Q8GTY0								0	9.142e-06
wAVLVAGSSGYGNYR	3	1	1	Q39044	N-Term(iTRAQ8plex)	1.12684	1.03433	1.13057	0.935063	0.847751	0.941546	0	6.778e-09
yFAFcQIASR	30	1	1	Q9SK09	Y1(iTRAQ8plex); C5(Carbamidomethyl)	0.899524	0.813728	0.930387	1.15682	0.99891	1.22342	0	5.152e-08
aNSEATLGTYk	4	2	2	Q9LF98;Q56Z19	N-Term(iTRAQ8plex); K11(iTRAQ8plex)							0	2.412e-10
wSGMTAIGGGSGGLMGSLR	2	2	1	Q9C7F4	N-Term(iTRAQ8plex)	0.856036	0.985622	0.930236	1.04185	1.04299	1.25291	0	7.927e-11
tNDNAYINTLSGQTSyLR	18	1	1	Q9ZWA9	N-Term(iTRAQ8plex); Y16(iTRAQ8plex)	1.07378	0.999375	1.20063	0.986337	0.734532	0.939609	0	3.393e-13
aVFLPDNSDFMIFNHR	1	1	1	Q2HIM5	N-Term(iTRAQ8plex)	1.1146	0.935738	1.08036	0.960058	0.911769	1.01333	0	8.614e-09
aGGFGDILTDQk	3	1	1	Q9FWA3	N-Term(iTRAQ8plex); K12(iTRAQ8plex)	1.01791	1.04701	1.07167	0.961773	0.999985	0.845761	0	1.951e-09
dIESAYWELVVk	2	1	1	Q9LYR4	N-Term(iTRAQ8plex); K12(iTRAQ8plex)	1.10173	1.17303	0.965455	0.84887	1.01169	0.895177	0	1.584e-10
vALITGGDSGIGR	24	1	1	Q9FZ42	N-Term(iTRAQ8plex)	1.04023	1.12026	1.0483	0.945922	0.922601	0.927755	0	7.154e-07
gLDVIQQAQSGTGk	4	8	2	P41376;P41377	N-Term(iTRAQ8plex); K14(iTRAQ8plex)							0	1.799e-12
lDAcSFVANVYDEGk	1	1	1	F4JVN6	N-Term(iTRAQ8plex); C4(Carbamidomethyl); K15(iTRAQ8plex)	0.922246	1.0082	1.09327	1.00807	1.01805	1.01491	0	4.617e-10
qQGTcPYTVVVMTScLSPESTR	3	1	1	B9DGU8	N-Term(iTRAQ8plex); C5(Carbamidomethyl); C15(Carbamidomethyl)	0.784384	0.875094	0.979717	1.14668	1.1233	1.17858	0	3.752e-11
aEIAEPEWINPMADYWk	7	1	1	Q9C7N3	N-Term(iTRAQ8plex); K17(iTRAQ8plex)	1.07071	1.12938	1.13338	0.857008	0.96683	0.792897	0	7.691e-07
sQDYEIGDGTTGVVVMAGALLEQAER	3	1	1	O04450	N-Term(iTRAQ8plex)	1.13132	0.864118	1.05509	0.846814	0.908899	1.09415	0	1.429e-06
sALVSSYVTPVDLFYk	1	1	1	Q9S850	N-Term(iTRAQ8plex); K16(iTRAQ8plex)	1.20074	1.17666	1.10552	0.785409	0.865754	0.802155	0	7.138e-10
vMSNQEAVDSIk	6	1	1	Q9LDA7	N-Term(iTRAQ8plex); K12(iTRAQ8plex)	1.12951	1.11042	1.12104	0.824955	0.871477	0.847124	0	1.011e-10
aVLYGSGNAYAPSLGLAAAk	1	2	1	Q9SUR6	N-Term(iTRAQ8plex); K20(iTRAQ8plex)	0.998453	0.827795	0.775722	1.27145	1.12428	1.15918	0	5.724e-09
fGFFIVEGEISEVR	1	1	1	Q84M96	N-Term(iTRAQ8plex)	1.18968	1.22386	0.962052	0.957763	0.876757	0.768232	0	5.103e-09
pMEEGLAEAIDDGR	5	1	1	Q9ASR1	N-Term(iTRAQ8plex)	1.05115	0.957766	1.06878	1.03148	0.895041	1.0366	0	1.697e-10
dMVAGVWSDDPALQLESTTQFR	1	1	1	Q96321	N-Term(iTRAQ8plex)	0.736297	0.873932	0.886805	1.1797	1.22269	1.29269	0	1.495e-12
aYGAEGHQEPTPGLGGGSTDAPTPSGDAPAATTTDAk	4	2	1	Q8S8R1	N-Term(iTRAQ8plex); K37(iTRAQ8plex)	0.503479	0.671801	0.622773	1.5094	1.72329	1.3465	0	2.772e-11
fSVGSGSPYAYGVLDSGYk	4	3	1	O23717	N-Term(iTRAQ8plex); K19(iTRAQ8plex)	0.980351	1.02166	0.99193	0.994391	1.07816	1.00939	0	3.422e-09
dAFAHFGDVVDAk	4	4	1	A8MSB9	N-Term(iTRAQ8plex); K13(iTRAQ8plex)	0.918239	0.687711	0.764398	1.28027	1.40047	1.1024	0	1.769e-10
mNAEGAAVQGSGWVWFGLDR	5	1	1	Q9LYK8	N-Term(iTRAQ8plex); M1(Oxidation)	0.984376	0.947562	1.04087	0.977701	0.910865	1.08357	0	9.283e-12
lGANSLLDIVVFGR	2	2	1	O82663	N-Term(iTRAQ8plex)	1.10453	1.05935	1.13689	0.789109	1.07447	0.798511	0	1.102e-09
aPIEVcFcYPDVDAAFk	1	1	1	Q9LQP1	N-Term(iTRAQ8plex); C6(Carbamidomethyl); C8(Carbamidomethyl); K17(iTRAQ8plex)	1.63623	1.2608	1.71095	0.376307	0.370233	0.290887	0	1.699e-09
tIDANVSEAEGIYSALEk	6	1	1	Q9LYR4	N-Term(iTRAQ8plex); K18(iTRAQ8plex)	1.05838	1.0526	1.03284	0.915316	1.01126	1.00037	0	1.45e-09
eAEASPSPVGVGDAFSNVk	2	2	1	Q9FKX3	N-Term(iTRAQ8plex); K19(iTRAQ8plex)	0.976349	0.91573	0.979129	1.06901	1.08195	1.05402	0	1.477e-10
gFEVIDEIk	6	1	1	Q9SD46	N-Term(iTRAQ8plex); K9(iTRAQ8plex)	1.06081	1.09396	1.11696	0.889631	0.960915	0.863645	0	3.138e-07
sAQFVLDLLk	8	3	2	P51413;Q93VI3	N-Term(iTRAQ8plex); K10(iTRAQ8plex)							0	9.894e-10
vLNLEEGGAFTNSSAEDmLk	1	1	1	Q949U7	N-Term(iTRAQ8plex); M18(Oxidation); K20(iTRAQ8plex)	0.857124	0.956149	0.832277	1.28713	1.06719	1.16613	0	6.018e-12
iFGQDTEVITSLIFk	4	1	1	Q9LIF8	N-Term(iTRAQ8plex); K15(iTRAQ8plex)	0.995434	1.0723	1.0817	0.987345	0.934387	0.918712	0	1.047e-11
dAFDFFGWLASk	5	1	1	Q9FLN9	N-Term(iTRAQ8plex); K12(iTRAQ8plex)	0.841444	1.03763	0.764235	1.10007	1.30337	1.13798	0	9.725e-11
aPLESYADIGGLEAQIQEIk	2	2	1	Q9SL67	N-Term(iTRAQ8plex); K20(iTRAQ8plex)	1.04372	1.0977	1.06925	0.923247	1.04663	0.824646	0	1.614e-09
iGIAHSPAWFEPEDVEGGQATVNR	7	1	1	Q9LIF9	N-Term(iTRAQ8plex)	1.0071	1.06555	1.02349	1.01022	1.05037	0.978256	0	2.506e-15
aTAELLFGAGHPVIk	3	3	1	F4JTH0	N-Term(iTRAQ8plex); K15(iTRAQ8plex)	1.08751	1.05862	1.07556	0.894775	0.914904	0.891176	0	1.517e-15
iIGATNPAASEPGTIR	2	1	1	P39207	N-Term(iTRAQ8plex)	1.02898	1.22082	1.04287	0.945908	0.870834	0.887379	0	2.572e-09
IVAMSSSAAWLTAPR	1	2	1	P0DKC6								0	1.109e-07
aSDLDIASVLGMSFPSYR	2	2	1	Q9ZPI6	N-Term(iTRAQ8plex)	0.989257	1.11724	1.06909	0.8312	1.00914	0.991103	0	2.847e-12
nWITFNEPWVFSR	8	1	1	Q9LIF9	N-Term(iTRAQ8plex)	1.10911	1.04223	1.14211	0.963507	0.777141	0.943067	0	1.893e-09
eGIEVAGENALETYGAk	1	1	1	P25853	N-Term(iTRAQ8plex); K17(iTRAQ8plex)	0.782547	0.815326	0.82457	1.26693	1.25581	1.26564	0	4.302e-10
vYSSYLELNLDDVEPcISGPk	1	1	1	Q9SIB9	N-Term(iTRAQ8plex); C16(Carbamidomethyl); K21(iTRAQ8plex)	1.05393	1.18733	1.20198	0.818238	0.776419	0.917268	0	2.423e-10
aVSLLAPVMGSEITcSk	2	4	2	Q38950;Q38951	N-Term(iTRAQ8plex); C15(Carbamidomethyl); K17(iTRAQ8plex)							0	2.856e-10
iIEEFGYQEIGHLR	4	1	1	Q9LZJ2	N-Term(iTRAQ8plex)	0.847686	0.944706	0.872081	1.17865	1.23725	1.17461	0	1.106e-10
gVSLLLPTDVVVADk	4	1	1	Q9LD57	N-Term(iTRAQ8plex); K15(iTRAQ8plex)	1.07601	1.1906	1.13288	0.802825	0.852801	0.820972	0	2.502e-10
eTNDAIASSYEAFTSWSR	1	1	1	Q9SAK4	N-Term(iTRAQ8plex)	0.921781	1.10841	0.955016	0.955325	1.16652	0.968394	0	3.107e-12
vPLVLMNSFNTHDDTQk	1	2	1	P57751	N-Term(iTRAQ8plex); K17(iTRAQ8plex)	1.05557	1.24162	1.1887	0.855547	0.884706	0.735594	0	2.534e-12
gVYPEVDATNLYYGSDR	4	5	1	Q683B7	N-Term(iTRAQ8plex)	0.94819	0.8815	1.01227	1.08431	0.964537	1.152	0	3.948e-09
eHALLAFTLGVk	13	3	1	Q8GTY0	N-Term(iTRAQ8plex); K12(iTRAQ8plex)	0.904926	1.13707	0.940232	1.04143	1.0012	0.933676	0	1.904e-12
sAVDGLTEMSESEk	1	1	1	Q9M9P3	N-Term(iTRAQ8plex); K14(iTRAQ8plex)	1.12561	1.06322	1.03873	0.956621	0.906596	0.912569	0	1.337e-08
sDAPLIGIEYVISDR	4	1	1	Q9C7N3	N-Term(iTRAQ8plex)	1.1198	1.14854	1.08416	0.751007	0.908282	0.87487	0	1.452e-10
gYITSDcDAVSIIYDAQGYAk	1	1	1	Q9SGZ5	N-Term(iTRAQ8plex); C7(Carbamidomethyl); K21(iTRAQ8plex)	0.972244	0.999707	0.992425	0.953839	1.22825	0.927683	0	9.712e-10
lITLLEQINSQTTk	1	4	1	Q8LBF6	N-Term(iTRAQ8plex); K14(iTRAQ8plex)	0.827198	0.810001	1.08923	1.2016	0.904379	1.29875	0	1.178e-09
vGFTDEFVAEMEPR	1	2	1	A0A090MHY5	N-Term(iTRAQ8plex)	1.04351	1.06768	1.21046	0.900457	0.850845	0.913276	0	2.03e-09
acQQLMLQQAR	25	1	1	P15457	N-Term(iTRAQ8plex); C2(Carbamidomethyl)	0.854399	0.725211	0.85664	1.29632	1.23427	1.24037	0	1.206e-09
aDVAEVcVQALQLEEAk	2	2	1	O80934	N-Term(iTRAQ8plex); C7(Carbamidomethyl); K17(iTRAQ8plex)	1.11136	0.94621	1.15811	0.994922	0.889571	0.904662	0	7.718e-11
qAFDDAIAELDTLGEESYk	1	1	1	P42644	N-Term(iTRAQ8plex); K19(iTRAQ8plex)	1.13662	1.14902	0.930402	0.906993	1.00186	0.880822	0	5.909e-10
sVLGQMETVYLNR	1	1	1	Q9LMJ7	N-Term(iTRAQ8plex)	0.992521	0.950685	1.04354	1.06504	0.955365	1.05867	0	3.444e-09
vIEAGANALVAGSAVFGAk	5	2	1	Q9SAU2	N-Term(iTRAQ8plex); K19(iTRAQ8plex)	1.09421	1.0999	1.13582	0.887385	0.917557	0.825946	0	2.011e-11
kVVDLPPAAIAFNPSTGAGTIFDSGTVYTR	1	2	1	Q9FL43	N-Term(iTRAQ8plex); K1(iTRAQ8plex)	0.933519	0.885142	1.05855	1.12497	1.11697	0.984358	0	1.115e-15
fGQISTVQIGNGcGGMGPYk	5	1	1	F4JQG6	N-Term(iTRAQ8plex); C13(Carbamidomethyl); K20(iTRAQ8plex)	0.942312	0.905319	1.04955	1.024	0.988911	1.17449	0	2.063e-12
sTEASLDEWLEGTTLAk	2	1	1	P45434	N-Term(iTRAQ8plex); K17(iTRAQ8plex)	1.14908	1.10201	1.23846	0.805983	0.801651	0.838332	0	7.097e-11
sQQAASLTEFSWLGYR	1	1	1	Q9FH46	N-Term(iTRAQ8plex)	1.05665	0.910387	1.07819	0.92121	0.776921	1.27664	0	2.424e-12
gVSLLLPTDVVIADk	5	5	2	F4I3L1;Q9SAJ4	N-Term(iTRAQ8plex); K15(iTRAQ8plex)							0	1.763e-08
eDAEGVVSAEMR	12	1	1	Q9LJ95	N-Term(iTRAQ8plex)	0.802896	0.792963	0.771091	1.21359	1.29949	1.20422	0	2.763e-08
rIVDDTITHFGR	12	1	1	P0DKC6	N-Term(iTRAQ8plex)	1.03676	0.908539	1.01693	0.952771	0.95711	1.07526	0	5.844e-09
fSLPSDNTQSWLLTTYLDk	1	1	1	O81439	N-Term(iTRAQ8plex); K19(iTRAQ8plex)	1.04534	0.955307	0.995723	0.965124	0.985191	1.1014	0	1.325e-07
aIDLVDEAcANVR	2	1	1	P42730	N-Term(iTRAQ8plex); C9(Carbamidomethyl)	1.10758	0.981298	1.01522	0.865498	0.847066	1.1692	0	3.401e-08
vAGGGTIPPPQGLLGLGR	7	2	1	Q9FL43	N-Term(iTRAQ8plex)	1.0134	1.05493	0.935357	1.05562	0.988749	1.00895	0	3.417e-09
mTAIDSDDDGVVR	2	1	1	Q9S791	N-Term(iTRAQ8plex)	1.05416	0.978138	1.05226	1.01777	0.95483	0.979167	0	1.075e-10
GLYLPSFFNTAk	2	1	1	P15455	K12(iTRAQ8plex)	0.866744	0.999899	1.03033	1.12941	0.989729	1.05225	0	0.000339
nALETYVYNMk	4	3	2	Q9LKR3;Q39043	N-Term(iTRAQ8plex); K11(iTRAQ8plex)							0	1.117e-11
kAEQYLADSGTPYTIIR	9	1	1	Q94EG6	N-Term(iTRAQ8plex); K1(iTRAQ8plex)	0.633682	0.616358	0.696869	1.35585	1.46455	1.38047	0	1.028e-10
vAAQVEDGPcVTYIGEGGSGNFVk	1	2	2	Q9SH69;Q9FFR3	N-Term(iTRAQ8plex); C10(Carbamidomethyl); K24(iTRAQ8plex)							0	5e-09
mESQLTRPYGHEQAEEPIR	1	2	1	F4KG52	N-Term(Acetyl)							0	6.075e-10
TGPFEFVGFTTSAHk	3	1	1	Q9SK09	K15(iTRAQ8plex)	0.70996	0.609448	0.647375	1.1351	2.00561	1.14419	0	2.807e-08
nQVAMNPTNTVFDAk	9	1	1	Q9LHA8	N-Term(iTRAQ8plex); K15(iTRAQ8plex)	0.975042	1.01252	1.11767	1.03455	0.94628	0.911158	0	6.517e-09
lSEWLTHAR	3	1	1	P28297	N-Term(iTRAQ8plex)	1.14686	0.980017	1.06788	1.05073	0.816022	0.983259	0	4.483e-07
aHLFDLGHPLLNR	14	1	1	Q0WMZ5	N-Term(iTRAQ8plex)	1.05125	1.15212	1.08607	0.903848	0.917124	0.881963	0	9.056e-11
tTAHNTHVGGGGATGYGTGGGYTG	4	2	1	Q9FG31	N-Term(iTRAQ8plex)	0.661958	0.577603	0.706889	1.50337	1.39107	1.29204	0	4.287e-11
sSGYGLIYDTVENAk	2	1	1	Q8LC83	N-Term(iTRAQ8plex); K15(iTRAQ8plex)	1.03447	0.924068	0.917192	1.00464	1.12226	1.01057	0	3.062e-09
lSLGELWEMTEGNR	3	1	1	O81270	N-Term(iTRAQ8plex)	0.916161	1.40033	0.803031	0.847824	1.00407	1.03174	0	3.949e-09
gGGVSSGNTGLSETLR	1	1	1	Q9ZPH2	N-Term(iTRAQ8plex)	1.03901	1.17317	1.24485	0.74872	0.823291	0.918602	0	4.978e-17
gLPGVLWVLPDSYIDVk	3	1	1	Q9LPZ1	N-Term(iTRAQ8plex); K17(iTRAQ8plex)	1.00839	0.909065	0.955531	1.0264	1.21061	0.947961	0	1.39e-07
aQYYGQQHTGGEHDRDR	99	1	1	P29525	N-Term(iTRAQ8plex)	1.12546	1.1356	1.16733	0.812863	0.861747	0.817257	0	1.327e-06
dLLGSLTPILDFHVk	2	2	1	F4K020	N-Term(iTRAQ8plex); K15(iTRAQ8plex)	0.985586	1.00685	1.10561	1.08352	0.976261	0.893114	0	5.727e-10
iALTDNSIVDQALGk	5	2	1	P60039	N-Term(iTRAQ8plex); K15(iTRAQ8plex)	1.01697	1.15297	1.09351	0.891655	0.95775	0.884587	0	1.159e-10
vVITGMGLVSVFGNDVDAYYEk	1	2	1	P52410	N-Term(iTRAQ8plex); K22(iTRAQ8plex)	1.08411	1.23101	1.12194	0.786699	0.997337	0.742577	0	2.005e-12
tMLELLNQLDGFDSR	3	2	1	Q9SL67	N-Term(iTRAQ8plex)	1.13026	1.04262	1.16674	0.875473	0.874908	0.868272	0	8.345e-10
aTTDLLHAGFTGVk	3	2	1	Q39129	N-Term(iTRAQ8plex); K14(iTRAQ8plex)	0.549802	0.602841	0.617333	1.46503	1.70173	1.4164	0	1.387e-09
aTIPDIVNHLASAVR	2	1	1	Q9LY84	N-Term(iTRAQ8plex)	0.97994	0.891899	0.904666	1.06683	1.16086	1.08979	0	1.938e-07
gTPSATQPPGSAQPTGSAGAk	6	1	1	Q9LIF8	N-Term(iTRAQ8plex); K21(iTRAQ8plex)	0.935368	0.918157	0.947581	1.05351	1.13272	0.967829	0	9.926e-09
vTVAEASGLTGETDQVQEFIR	1	3	1	Q0WSC4	N-Term(iTRAQ8plex)	0.915082	0.922479	0.853943	1.17056	1.08924	1.18721	0	1.185e-11
FSDDSYVESYISTIGVDFK	1	2	1	P28188								0	5.78e-06
iEVWDHHAPQLR	204	2	2	P15455;P15456	N-Term(iTRAQ8plex)							0	2.762e-10
lLYMTGTGMSEDTALNkR	10	2	1	P0DKC6	N-Term(iTRAQ8plex); K17(iTRAQ8plex)	1.03086	0.981699	1.10059	0.982499	0.997396	0.940214	0	1.805e-13
eQLGSDDPAFTQAADAMVk	1	1	1	Q9FFD2	N-Term(iTRAQ8plex); K19(iTRAQ8plex)	0.837379	1.00911	0.948298	0.964687	1.05952	1.28468	0	2.248e-12
gIYPAVDPLDSTSTMLQPR	4	1	1	P19366	N-Term(iTRAQ8plex)	1.0365	1.09758	1.04743	0.958767	0.889736	0.985671	0	1.993e-09
aMQLLESGLk	6	2	1	P42794	N-Term(iTRAQ8plex); K10(iTRAQ8plex)	0.989912	1.12128	0.9921	0.918168	1.11148	0.896785	0	9.736e-09
lALGALALDDTLSk	1	2	1	Q9ASV5	N-Term(iTRAQ8plex); K14(iTRAQ8plex)	0.974537	1.18074	0.965122	0.905803	1.14274	0.875465	0	5.058e-10
tVPHLADAMHAAVTR	4	2	1	P46645	N-Term(iTRAQ8plex)	0.855897	0.86689	0.948838	1.13451	1.02308	1.17716	0	2.2e-11
vTSVNSYTLPILEyVR	94	2	1	Q96318	N-Term(iTRAQ8plex); Y14(iTRAQ8plex)	0.962716	0.84242	1.08786	1.23205	0.755912	1.19693	0	1.156e-11
mTSHFESMAEk	6	3	1	Q9SIN3	N-Term(iTRAQ8plex); K11(iTRAQ8plex)	0.739223	0.742574	0.80388	1.23319	1.3577	1.29248	0	1.948e-09
hAGMAVAGLAADGR	2	1	1	O23715	N-Term(iTRAQ8plex)	0.809815	0.854754	0.920417	1.26894	1.20331	1.12222	0	1.129e-10
lHMGFLEAMGLGNR	1	4	1	Q9LUL3	N-Term(iTRAQ8plex)	1.05444	0.898617	1.07339	0.948912	0.862848	1.19333	0	2.901e-10
mDQIVNVDEFQELAk	1	2	1	Q9LJH5	N-Term(Acetyl); K15(iTRAQ8plex)	1.14459	0.849064	0.955975	1.0276	1.00391	1.07098	0	1.252e-08
iVPATAIPDGWMGLDIGPDSIk	3	4	1	Q9SAJ4	N-Term(iTRAQ8plex); K22(iTRAQ8plex)	1.39791	1.15534	1.14139	0.773914	0.74868	0.640652	0	6.895e-08
nQVAMNPVNTVFDAk	4	4	2	P22954;P22953	N-Term(iTRAQ8plex); K15(iTRAQ8plex)							0	3.179e-09
nGDWSIVQGLPIDEVSR	3	2	1	P93819	N-Term(iTRAQ8plex)	0.889353	0.948348	0.883086	0.984911	0.948078	1.33155	0	8.89e-15
gFIFGVASSAYQVEGGR	2	1	1	P37702	N-Term(iTRAQ8plex)	1.12257	1.03885	0.993844	0.951078	1.023	0.887239	0	1.279e-10
nSPWLGSFGVDPELASALPk	2	1	1	Q8W453	N-Term(iTRAQ8plex); K20(iTRAQ8plex)	0.862119	0.843494	0.950341	1.18514	1.16239	1.14399	0	1.172e-11
gPGVQTPVIVR	4	1	1	Q96528	N-Term(iTRAQ8plex)	0.885229	0.793957	0.839344	1.12891	1.26009	1.2188	0	8.669e-06
iVIGLYGDDVPQTVENFR	4	1	1	Q9ASS6	N-Term(iTRAQ8plex)	1.0709	0.963846	0.942663	1.02935	0.945741	1.05953	0	4.045e-10
iGVFIEGEPIEPSR	1	1	1	Q9LD43	N-Term(iTRAQ8plex)	1.19671	1.19279	1.07722	0.800458	0.868268	0.806219	0	2.943e-08
yTQGFSGADITEIcQR	4	3	2	P54609;Q9SCN8	Y1(iTRAQ8plex); C14(Carbamidomethyl)							0	3.618e-11
lcSQFEEEVEEER	4	2	1	Q3EDG6	N-Term(iTRAQ8plex); C2(Carbamidomethyl)	1.0156	0.898162	1.04151	1.07004	1.01962	1.04568	0	8.792e-11
mASFVGAMAISDLVk	4	1	1	Q940P8	N-Term(iTRAQ8plex); K15(iTRAQ8plex)	1.0777	0.954069	1.14127	0.959533	0.889956	1.02509	0	2.474e-11
dSLSGDENDESWTGWAk	16	3	1	Q9ZRT9	N-Term(iTRAQ8plex); K17(iTRAQ8plex)	0.712929	0.72793	0.703469	1.32391	1.43769	1.29042	0	1.478e-08
nDAPmGAGENMk	3	1	1	Q9FE54	N-Term(iTRAQ8plex); M5(Oxidation); K12(iTRAQ8plex)	0.936831	0.911667	0.916087	1.07377	1.11333	1.18771	0	6.444e-07
iVPGAAATEIELAQR	4	1	1	Q94K05	N-Term(iTRAQ8plex)	0.922537	0.839315	0.915965	0.973463	1.13073	1.23261	0	5.09e-06
dGFLLLQFAPSAGVR	2	1	1	Q9M9S3	N-Term(iTRAQ8plex)	1.23319	1.10242	0.773376	0.986458	0.867759	1.02574	0	1.095e-09
gGFVHPGDTTDLAAER	2	1	1	Q9LJ97	N-Term(iTRAQ8plex)	0.78578	1.64085	0.80957	0.836242	0.981972	0.974541	0	3.548e-10
tTPSYVAFTDTER	3	1	1	Q9S9N1	N-Term(iTRAQ8plex)	1.01038	1.26769	1.29941	0.840557	0.819778	0.919145	0	2.372e-08
qVLAQIWSLSDR	1	2	1	Q0WTU8	N-Term(iTRAQ8plex)	1.25316	0.785731	0.919771	1.13718	0.871456	1.07808	0	6.182e-09
gDDLGWVDFAYTSPHR	3	1	1	Q9M1J6	N-Term(iTRAQ8plex)	0.95107	1.01243	0.828292	0.87326	1.10723	1.14766	0	2.236e-11
sLNEGGSTDTNIDTFVSR	2	1	1	O22822	N-Term(iTRAQ8plex)	0.90355	0.948604	1.00071	1.07722	1.07778	1.08342	0	2.444e-15
vPIDVFAGITDEDAAk	1	2	1	O82662	N-Term(iTRAQ8plex); K16(iTRAQ8plex)	0.975694	1.04345	1.10369	0.915716	1.09604	0.903783	0	6.471e-07
vLQNPIVTEVAEk	2	1	1	O80944	N-Term(iTRAQ8plex); K13(iTRAQ8plex)	1.02612	1.0915	1.06549	0.969097	0.937178	0.927695	0	9.56e-09
tAGGPFVTTSYDYDAPIDEYGLIR	3	1	1	Q9SCV9	N-Term(iTRAQ8plex)	0.952666	0.989825	0.878667	1.07186	1.01005	1.05989	0	8.301e-13
qLIDLGPTGLLPLEIR	1	1	1	O23264	N-Term(iTRAQ8plex)	1.23947	1.05943	0.901995	1.05675	0.916179	0.836696	0	1.759e-10
gPVIDAVVWHDGEVWR	5	1	1	F4JVN6	N-Term(iTRAQ8plex)	0.993476	1.06066	1.01404	0.96361	0.952894	0.97567	0	4.81e-08
sENAVQANMELEFQR	4	3	2	Q42560;Q9SIB9	N-Term(iTRAQ8plex)							0	5.292e-13
mVIAAAGAVk	2	2	1	C0Z325	N-Term(iTRAQ8plex); K10(iTRAQ8plex)	0.901928	0.925226	0.912305	1.12359	1.14413	1.1096	0	8.005e-08
aLIAAEYAGVk	5	2	1	Q9FVT2	N-Term(iTRAQ8plex); K11(iTRAQ8plex)	1.04251	0.955593	1.04527	0.995668	0.98342	0.959562	0	1.054e-09
iVVNcGIGDAAQNDk	1	1	1	O04603	N-Term(iTRAQ8plex); C5(Carbamidomethyl); K15(iTRAQ8plex)	0.905736	1.0381	0.939931	1.25107	0.905846	1.07305	0	2.72e-10
hNGNISFDDVTEIAR	1	2	1	Q9LFH5	N-Term(iTRAQ8plex)	0.791003	0.968478	0.830091	1.09435	1.13655	1.33894	0	2.137e-10
eQVFSTYSDNQPGVLIQVYEGER	3	2	2	O65719;P22953	N-Term(iTRAQ8plex)							0	4.753e-12
sLNTVWAQHLSEEVR	1	3	1	P17094	N-Term(iTRAQ8plex)	0.844351	0.96536	0.829746	1.06339	1.29444	1.15497	0	8.834e-10
vEIVVAETGWASR	2	1	1	Q9M069	N-Term(iTRAQ8plex)	0.894905	1.06821	0.950596	0.961871	1.03264	1.16695	0	6.094e-08
lVDILAQHFDIVAR	6	2	1	Q8LEZ6	N-Term(iTRAQ8plex)	1.10612	1.16485	1.13222	0.84056	0.688816	0.926709	0	4.575e-10
eAAESTLVAYk	5	4	3	P42644;P42645;Q96300	N-Term(iTRAQ8plex); K11(iTRAQ8plex)							0	4.219e-11
dIFQEVYEASWk	2	1	1	Q9SRZ6	N-Term(iTRAQ8plex); K12(iTRAQ8plex)	0.842301	1.34801	0.790215	0.947698	1.24155	0.901643	0	1.954e-10
eGFLLLQFAPAAGVR	2	1	1	Q66GR6	N-Term(iTRAQ8plex)	1.01295	0.953778	1.06445	1.03086	0.958001	1.0226	0	3.043e-09
lVLDFLAAIHAAEk	1	2	1	Q9ASV5	N-Term(iTRAQ8plex); K14(iTRAQ8plex)	1.18743	1.14392	1.09522	0.895992	0.841739	0.793924	0	3.134e-11
aFGPALVGWR	6	2	1	O22588	N-Term(iTRAQ8plex)	0.960352	1.43469	1.04709	0.770969	0.858187	0.804922	0	1.617e-07
lGDSGDADVVVLk	3	2	1	O65390	N-Term(iTRAQ8plex); K13(iTRAQ8plex)	1.11577	1.16865	1.09934	0.906887	0.950798	0.783387	0	4.371e-11
lIGcGSAVPSLLISNDDLAk	2	2	1	B9DHF9	N-Term(iTRAQ8plex); C4(Carbamidomethyl); K20(iTRAQ8plex)	1.24733	1.1259	1.3821	0.771723	0.654327	0.674817	0	5.002e-11
sGETEDTFIADLAVGLSTGQIk	6	2	1	P25696	N-Term(iTRAQ8plex); K22(iTRAQ8plex)	1.11757	1.11832	1.03055	0.828781	1.05535	0.833085	0	3.486e-13
aDLNVPLDDNQTITDDTR	2	1	1	Q9LD57	N-Term(iTRAQ8plex)	0.778365	0.914048	0.839391	1.0765	1.20644	1.09198	0	3.392e-11
dAVLLVFANk	6	7	1	P36397	N-Term(iTRAQ8plex); K10(iTRAQ8plex)	1.02323	1.26387	1.06557	0.850876	0.875365	0.820745	0	6.915e-09
aIFASGSPFDPVEYEGk	4	1	1	O82191	N-Term(iTRAQ8plex); K17(iTRAQ8plex)	1.04036	1.08082	1.06306	0.901556	0.975988	0.900664	0	5.241e-10
nSVATGEVYPLDSEVR	1	2	1	Q9ZW85	N-Term(iTRAQ8plex)	1.08353	1.00599	1.1059	0.958055	0.883992	0.971744	0	1.512e-09
vVDLLAPYQR	7	4	1	P83483	N-Term(iTRAQ8plex)	1.14274	1.12521	1.16059	0.906403	0.861988	0.760922	0	7.482e-06
eQSAASGDQTQIQR	2	1	1	Q9LE44	N-Term(iTRAQ8plex)	0.766525	0.917918	0.851125	0.998349	1.13921	1.45122	0	5.272e-10
nAVDMALADSScAGLETTESR	1	11	1	Q8L456	N-Term(iTRAQ8plex); C12(Carbamidomethyl)	0.898805	0.931823	0.952175	1.24461	0.976299	1.126	0	6.436e-12
aIANEcQANFISVk	4	2	1	P54609	N-Term(iTRAQ8plex); C6(Carbamidomethyl); K14(iTRAQ8plex)	1.06184	0.995136	1.08158	0.892461	0.975898	0.939214	0	9.297e-09
fTGVGAQILGANDk	3	1	1	Q94FY7	N-Term(iTRAQ8plex); K14(iTRAQ8plex)	0.981886	1.01261	1.02294	1.08109	0.989299	1.01957	0	5.758e-10
eTEFMTETHEPGk	31	1	1	Q42431	N-Term(iTRAQ8plex); K13(iTRAQ8plex)	1.06257	1.07898	1.09849	0.908497	0.966533	0.816548	0	1.329e-10
iTYVEDVADGLEk	5	10	2	Q8LDI4;Q39172	N-Term(iTRAQ8plex); K13(iTRAQ8plex)							0	1.152e-08
gIPYEYVEEILENk	1	2	1	P46421	N-Term(iTRAQ8plex); K14(iTRAQ8plex)	1.11508	1.2132	1.11171	0.773251	0.993264	0.751277	0	1.313e-07
gPAPLSLALAHADIDEAGk	4	2	1	E0Y422	N-Term(iTRAQ8plex); K19(iTRAQ8plex)	0.687694	0.685953	0.712625	1.40149	1.62047	1.2943	0	1.384e-15
gGGGQGGGWk	29	1	1	Q9FJS3	N-Term(iTRAQ8plex); K10(iTRAQ8plex)	0.480571	0.509622	0.534019	1.52466	1.72476	1.44465	0	4.729e-06
lVYTNDGGEIVk	3	3	1	Q9FKW6	N-Term(iTRAQ8plex); K12(iTRAQ8plex)	0.953278	0.973785	0.865413	1.12259	1.1523	1.02119	0	1.044e-08
aLPTYTPDSPGDATR	3	1	1	F4IW47	N-Term(iTRAQ8plex)	1.11659	0.852427	1.04847	1.03647	0.919905	0.900623	0	2.442e-10
sVSTAASSLVQNLR	2	2	1	Q8LCY6	N-Term(iTRAQ8plex)	0.726827	0.697433	0.690573	1.36554	1.36468	1.42735	0	6.008e-10
tVSGVAGPLVILDk	3	2	1	P11574	N-Term(iTRAQ8plex); K14(iTRAQ8plex)	1.01671	1.07568	1.09746	1.05012	0.96438	0.888527	0	8.842e-11
vIEYTAGVSAVAIk	2	1	1	Q9LX13	N-Term(iTRAQ8plex); K14(iTRAQ8plex)	0.717089	1.02334	0.730309	1.24034	1.32104	1.17987	0	7.918e-10
vTSEFDSDSLLFLNk	1	1	1	O80565	N-Term(iTRAQ8plex); K15(iTRAQ8plex)	0.937629	1.02538	1.01966	1.02687	1.08191	0.984866	0	9.964e-11
tkPSVNFTDEEIQELTVR	3	2	1	Q9SN86	N-Term(iTRAQ8plex); K2(iTRAQ8plex)	1.04465	1.02674	1.05761	1.0494	1.01896	0.976411	0	1.616e-09
aPcIVFIDEIDAVGR	1	4	1	Q9FH02	N-Term(iTRAQ8plex); C3(Carbamidomethyl)	1.03315	1.04191	0.976663	0.924444	0.975972	1.0854	0	1.185e-09
aADGDIVSAIMELTT	2	1	1	Q9LHG9	N-Term(iTRAQ8plex)	0.91526	0.828779	0.990457	1.121	1.09843	1.14246	0	2.88e-07
aVAVVVDPIQSVk	3	2	1	A8MR12	N-Term(iTRAQ8plex); K13(iTRAQ8plex)	1.04447	0.913426	1.09691	0.978938	1.03497	0.98649	0	1.045e-08
fNTIGVSDAISMGTR	4	1	1	Q9LIR4	N-Term(iTRAQ8plex)	0.991281	0.937284	0.920991	1.11798	0.941403	1.15096	0	4.811e-09
sTGEIGAASTVSAIGR	4	2	1	Q8RY15	N-Term(iTRAQ8plex)	0.838793	0.900273	0.784497	1.24108	1.21772	1.17964	0	4.145e-15
iTAGITGLSEVQFDVER	2	2	1	O23443	N-Term(iTRAQ8plex)	1.16429	0.945229	1.23741	0.824844	0.822145	0.933104	0	1.493e-09
dTSGDYEDMLVALLGHGDA	1	4	1	Q9XEE2	N-Term(iTRAQ8plex)	1.05525	0.705761	1.11261	1.06126	1.09534	1.04736	0	1.727e-06
tANLANNQIINYk	2	2	2	Q0WLB5;Q0WNJ6	N-Term(iTRAQ8plex); K13(iTRAQ8plex)							0	6.501e-12
nQALQDAGATVPTSFEALEVAIk	2	1	1	Q9C522	N-Term(iTRAQ8plex); K23(iTRAQ8plex)	0.956938	1.05907	1.03385	1.0184	0.925729	1.03579	0	2.031e-11
fANFSIESEVPk	4	1	1	Q9ZRW8	N-Term(iTRAQ8plex); K12(iTRAQ8plex)	0.888221	0.942536	0.974213	1.12369	1.13575	1.07064	0	1.231e-10
eLVWDPIISSYGPDEGLPELR	1	1	1	Q9C969	N-Term(iTRAQ8plex)	0.997797	0.942991	1.01833	1.06388	0.802548	1.23434	0	1.959e-10
dLGLFEDAVSDLSk	2	1	1	B7ZWR6	N-Term(iTRAQ8plex); K14(iTRAQ8plex)	0.948275	0.979132	1.09758	0.996709	1.11703	0.910348	0	3.75e-11
vLDVVYNASNNELVR	4	1	1	Q93VG5	N-Term(iTRAQ8plex)	0.946385	1.07748	0.960151	1.09623	0.962743	1.00668	0	2e-07
gFGFVNFENSDDAAR	1	1	1	Q9FXA2	N-Term(iTRAQ8plex)	0.966862	1.01597	1.10934	0.926661	1.08551	0.939449	0	1.227e-08
vSPYIAELEQLEEQAQQEGFGR	1	2	1	Q9FLT0	N-Term(iTRAQ8plex)	0.858133	0.677166	1.17812	1.27081	1.0668	1.09425	0	3.047e-08
sPPIEEVIDAGVVPR	2	1	1	F4JL11	N-Term(iTRAQ8plex)	0.983621	1.00102	1.01094	0.931099	0.943617	1.17631	0	9.673e-08
vQEMIGTVNTSGALSAFEk	1	2	1	O80796	N-Term(iTRAQ8plex); K19(iTRAQ8plex)	1.04033	1.00207	1.05175	1.10145	0.96812	0.888732	0	3.324e-11
tAGNkPVDQSDAAAIQAAEMR	2	1	1	Q9LJ95	N-Term(iTRAQ8plex); K5(iTRAQ8plex)	0.826364	0.790276	0.958566	1.32754	1.19668	1.08658	0	4.957e-11
lGPNYLQLPVNAPk	12	13	3	B9DHU0;Q96528;P25819	N-Term(iTRAQ8plex); K14(iTRAQ8plex)							0	4.248e-07
mLLDAGGGIVVTNDGNAILR	1	1	1	Q84WV1	N-Term(iTRAQ8plex)	0.935379	0.856026	1.18769	1.03159	0.987862	1.06845	0	4.716e-12
sGGEMESAQAk	3	2	2	Q9C522;Q9FGX1	N-Term(iTRAQ8plex); K11(iTRAQ8plex)							0	1.702e-11
rDEWAGTLDAVINR	1	1	1	Q9SRQ6	N-Term(iTRAQ8plex)	0.89332	0.994074	0.927369	1.16904	0.985738	1.14825	0	3.261e-13
aIVNIISNPVNSTVPIAAEVFk	2	1	1	O82399	N-Term(iTRAQ8plex); K22(iTRAQ8plex)	0.972318	1.05334	0.983963	0.893677	0.981144	1.15547	0	1.935e-11
tLWYEIGSAVAVEGR	2	1	1	Q9LXA8	N-Term(iTRAQ8plex)	1.17217	0.914248	0.89909	1.02143	0.965828	1.05284	0	1.276e-09
iAESEPVELFSSAQR	6	1	1	Q9LE44	N-Term(iTRAQ8plex)	0.776264	0.68929	0.659145	1.36578	1.52029	1.28344	0	8.489e-11
sSGFGLIYDTVESAk	4	1	1	Q9SS17	N-Term(iTRAQ8plex); K15(iTRAQ8plex)	1.05679	1.08721	1.08676	0.921062	0.957169	0.825183	0	6.711e-11
fVTSLAADmDDHILk	14	1	1	Q39132	N-Term(iTRAQ8plex); M9(Oxidation); K15(iTRAQ8plex)	0.896905	0.996493	0.909263	1.06554	1.06589	1.03088	0	3.781e-07
vVLITGASSGIGEQLAyEYAcR	10	1	1	P0DKC6	N-Term(iTRAQ8plex); Y17(iTRAQ8plex); C21(Carbamidomethyl)	0.97917	1.00731	1.08439	0.998748	0.892382	0.91298	0	4.914e-13
lPLSGGGSGVk	7	3	1	F4KG52	N-Term(iTRAQ8plex); K11(iTRAQ8plex)	0.806428	0.742906	0.754365	1.25523	1.47487	1.26775	0	3.279e-08
hQTEGGGTQFVSLSDk	5	3	1	Q9SIN3	N-Term(iTRAQ8plex); K16(iTRAQ8plex)	0.557682	0.595299	0.645904	1.44064	1.72067	1.32876	0	2.257e-10
aAEDPEFETFYTk	2	2	1	Q8HT12	N-Term(iTRAQ8plex); K13(iTRAQ8plex)	1.16452	1.18055	1.07461	0.80277	0.879605	0.799711	0	2.046e-06
aPNVTLGHAADTAk	6	1	1	Q9T077	N-Term(iTRAQ8plex); K14(iTRAQ8plex)	0.721605	0.697512	0.730103	1.37823	1.42245	1.34869	0	1.45e-11
vSSMPIVTFSIGGR	4	3	1	F4JGD2	N-Term(iTRAQ8plex)	0.828771	0.554506	0.743486	1.34502	1.27739	1.35417	0	4.313e-09
qLMVDLMSTVENR	2	1	1	Q8LDU4	N-Term(iTRAQ8plex)	1.03198	1.05024	1.10213	0.920164	0.799321	1.06795	0	2.324e-09
ycDGSSFTGNVEAVNPANk	4	2	1	Q940J8	N-Term(iTRAQ8plex); C2(Carbamidomethyl); K19(iTRAQ8plex)	0.938647	1.02999	1.02583	1.16807	0.961968	0.951641	0	1.545e-10
qGLFTSDQDLFVDk	5	2	1	Q96520	N-Term(iTRAQ8plex); K14(iTRAQ8plex)	1.09245	1.13005	1	0.882852	1.04729	0.95139	0	3.288e-07
vFESMQQLSNk	6	7	2	Q8LDQ7;O23523	N-Term(iTRAQ8plex); K11(iTRAQ8plex)							0	7.833e-11
nPDLASLVVDPEFAk	1	1	1	Q9SH69	N-Term(iTRAQ8plex); K15(iTRAQ8plex)	1.02084	1.10478	1.02098	0.981939	1.01696	0.890983	0	7.695e-10
hLLLPVIDR	2	2	1	Q9FKX3	N-Term(iTRAQ8plex)	1.13884	1.11818	1.06169	0.829106	0.912132	0.907386	0	2.671e-06
aFDNFQFVNFTEIMSk	2	1	1	Q9SS90	N-Term(iTRAQ8plex); K16(iTRAQ8plex)	1.0605	0.966606	1.16144	0.948798	0.99403	0.883072	0	4.067e-09
ySQYVGSANAk	32	1	1	Q9FF39	N-Term(iTRAQ8plex); K11(iTRAQ8plex)	0.773724	0.817533	0.8872	1.33919	1.22524	1.20866	0	2.793e-10
nPEYMVGTTELPGYcR	2	1	1	Q8LAN3	N-Term(iTRAQ8plex); C15(Carbamidomethyl)	0.772696	0.767592	0.746934	1.27443	1.38562	1.29067	0	3.254e-10
vGDALEWVHR	2	1	1	Q39085	N-Term(iTRAQ8plex)	0.877351	0.943158	0.833308	1.16841	1.19305	1.11397	0	5.011e-08
eLGSPNVVTVHADVSkPDDcR	7	1	1	P0DKC6	N-Term(iTRAQ8plex); K16(iTRAQ8plex); C20(Carbamidomethyl)	1.08929	1.38473	1.18489	0.752527	0.859327	0.652729	0	7.893e-10
fADYGGSLLFVPAGR	1	1	1	O81746	N-Term(iTRAQ8plex)	1.1903	1.16853	1.01791	0.817276	0.755261	1.00116	0	6.956e-10
iQVEHPVTEMIYSVDLIEEQIR	2	3	1	O04983	N-Term(iTRAQ8plex)	0.598269	1.07889	0.98596	1.12693	1.23783	1.05762	0	5.533e-12
lIPVTLGQVFQR	3	1	1	Q9LW57	N-Term(iTRAQ8plex)	1.23865	1.11584	1.17746	0.774466	0.894754	0.755045	0	1.708e-07
lSSDPTTTSQLVANEPASFTGSEVR	1	2	1	C0Z325	N-Term(iTRAQ8plex)	0.89992	1.01781	0.698571	1.13534	1.16186	1.2402	0	7.659e-13
gPLWILGDVFMGk	5	5	2	O65390;Q8VYL3	N-Term(iTRAQ8plex); K13(iTRAQ8plex)							0	8.661e-14
fYcWDTAGQEk	2	3	1	P41916	N-Term(iTRAQ8plex); C3(Carbamidomethyl); K11(iTRAQ8plex)	1.1717	1.15884	1.20886	0.849385	0.777376	0.735482	0	1.118e-10
dAMNNLGGDSNk	4	2	1	Q42560	N-Term(iTRAQ8plex); K12(iTRAQ8plex)	0.998965	1.16824	1.01738	0.894318	0.970811	0.881329	0	2.41e-11
iDGVEALNNVLLIGMTNR	3	1	1	Q9M0Y8	N-Term(iTRAQ8plex)	0.995628	0.891188	0.896832	0.902577	0.97975	1.25261	0	1.127e-12
dQEFIETTSEPGLTFLVAk	5	1	1	Q8VYL3	N-Term(iTRAQ8plex); K19(iTRAQ8plex)	0.807548	1.15084	0.814839	1.08635	1.11563	1.05609	0	1.18e-10
tFAPGGEDDYLGGQR	5	2	1	F4KG52	N-Term(iTRAQ8plex)	0.815169	0.812564	0.902579	1.28319	1.15307	1.29633	0	3.783e-07
eVVFQLLPLSEIALR	2	3	1	P94078	N-Term(iTRAQ8plex)	1.19907	1.15155	1.13103	0.587439	1.05549	0.770022	0	9.939e-11
vQLLEIAQVPDEHVNEFk	6	3	2	Q9M9P3;P57751	N-Term(iTRAQ8plex); K18(iTRAQ8plex)							0	1.147e-12
sEADIEASLQTPSPAAR	1	1	1	Q9M084	N-Term(iTRAQ8plex)	1.10199	1.04995	1.08637	0.907163	0.935624	0.917612	0	3.952e-10
sESPIITPNELAEADGFVFGFPTR	1	2	1	Q9LSQ5	N-Term(iTRAQ8plex)	1.31838	0.673664	0.66073	1.32322	1.07207	1.07053	0	1.491e-11
vVIGMDVAASEFYSEDk	4	3	1	P25696	N-Term(iTRAQ8plex); K17(iTRAQ8plex)	0.955468	1.10217	0.930754	1.06239	1.08053	0.974446	0	7.045e-10
sSGATLNVEQGk	3	3	1	Q8L790	N-Term(iTRAQ8plex); K12(iTRAQ8plex)	0.959222	0.971242	0.978405	1.09002	1.02421	1.06557	0	1.134e-09
iGGSLQDQVIYDVGNLk	2	1	1	Q9FF10	N-Term(iTRAQ8plex); K17(iTRAQ8plex)	1.02141	1.04253	1.01513	0.921632	1.04547	0.924756	0	2.587e-09
sIITGELPAGWEk	7	2	1	F4JBY2	N-Term(iTRAQ8plex); K13(iTRAQ8plex)	1.08943	1.14664	1.06498	0.84926	0.836919	0.872254	0	2.163e-13
dLYGNIVLSGGSTmFPGIADR	1	1	1	P53492	N-Term(iTRAQ8plex); M14(Oxidation)	0.934604	0.965463	0.968123	1.09329	1.1143	1.02697	0	4.927e-08
sYAELLQDLMEk	1	4	1	F4J109	N-Term(iTRAQ8plex); K12(iTRAQ8plex)	0.909534	1.48519	0.871077	0.856912	1.23251	0.681425	0	3.358e-08
iLFEETGSPLIPLEEFR	2	2	1	Q9M9P5	N-Term(iTRAQ8plex)	0.975891	0.796519	0.864494	1.11438	0.994963	0.969708	0	1.474e-10
tVGFTEIDVVDPESGR	1	1	1	Q9FFE6	N-Term(iTRAQ8plex)	1.07313	1.0382	1.0651	0.938249	0.901786	0.995947	0	4.965e-09
sDDTVDFVVTGSWGDk	1	1	1	Q96255	N-Term(iTRAQ8plex); K16(iTRAQ8plex)	0.93206	0.81233	0.788381	1.25206	1.31014	1.0866	0	2.335e-10
sVSGGVTQPSEGSEEL	3	1	1	Q9FE54	N-Term(iTRAQ8plex)	0.909855	0.945916	0.912138	1.18154	1.08384	1.14467	0	2.378e-06
eQLGHEGYQEMGHk	10	1	1	Q07187	N-Term(iTRAQ8plex); K14(iTRAQ8plex)	0.667694	0.684969	0.713016	1.34291	1.50458	1.23026	0	2.98e-14
vFDLAPEEYVLk	23	5	2	O65390;Q8VYL3	N-Term(iTRAQ8plex); K12(iTRAQ8plex)							0	1.478e-11
aLDSLLMASk	29	2	1	O04005	N-Term(iTRAQ8plex); K10(iTRAQ8plex)	0.624099	0.676577	0.638171	1.41249	1.58388	1.29844	0	1.234e-08
lLNPELAIQHILPcVk	3	5	3	Q38845;Q38951;Q38950	N-Term(iTRAQ8plex); C14(Carbamidomethyl); K16(iTRAQ8plex)							0	2.079e-07
dDLFNINANIVk	2	1	1	Q9SN86	N-Term(iTRAQ8plex); K12(iTRAQ8plex)	1.10223	1.0406	1.16659	0.955191	0.894688	0.826226	0	4.263e-08
iAPSELGILMR	2	2	2	Q94AZ4;Q8VZ50	N-Term(iTRAQ8plex)							0	1.254e-05
tPAQLEAAFAFFASTGPEDFk	1	2	1	Q8W4F3	N-Term(iTRAQ8plex); K21(iTRAQ8plex)	1.09672	1.34226	1.00486	0.725589	1.00445	0.783195	0	8.061e-11
gAVTSWIAGTTEEVTQk	8	3	1	Q8RY15	N-Term(iTRAQ8plex); K17(iTRAQ8plex)	0.733145	0.76136	0.736631	1.30302	1.54108	1.2363	0	2.067e-11
eHVMESSPQFSSSDYQPSNk	10	1	1	Q9FZ42	N-Term(iTRAQ8plex); K20(iTRAQ8plex)	0.948649	1.20337	0.966228	0.935866	1.11995	0.872826	0	4.844e-11
vPVLETPEGPIFESNAIAR	5	3	1	Q9FVT2	N-Term(iTRAQ8plex)	1.16662	1.15238	1.11164	0.855255	0.882958	0.820932	0	5.879e-08
vVIADSGELPL	3	1	1	Q8LDP4	N-Term(iTRAQ8plex)	0.966204	0.942606	1.15439	0.867126	0.834639	1.04287	0	6.867e-05
vVEVVSGDcLIVADDAVPFGSPAAER	1	3	1	Q8VZG7	N-Term(iTRAQ8plex); C9(Carbamidomethyl)	0.91079	0.932932	0.763978	1.0324	1.29603	1.20969	0	2.445e-12
eSIGVIPGLAVILVGDR	1	1	1	O65271	N-Term(iTRAQ8plex)	1.05101	0.999661	0.971819	0.821724	1.25692	0.941094	0	1.694e-10
dGFPDPIEGMDScWDVFR	1	1	1	Q9T0A0	N-Term(iTRAQ8plex); C13(Carbamidomethyl)	1.18293	0.819002	1.06973	1.27433	0.820246	0.884963	0	3.187e-08
mLSEIGTVENIPEFIEGVk	5	1	1	Q9SJH7	N-Term(iTRAQ8plex); K19(iTRAQ8plex)	0.994505	0.954371	1.0533	0.921005	1.06079	0.926188	0	4.731e-13
dLHDAIASGNYPEWk	5	7	1	B9DHU0	N-Term(iTRAQ8plex); K15(iTRAQ8plex)	0.982166	1.02438	1.03661	0.914386	1.12752	1.09891	0	5.955e-12
aNDFDLMYEQVk	5	1	1	P25697	N-Term(iTRAQ8plex); K12(iTRAQ8plex)	1.1377	0.979328	1.14014	0.928402	0.948396	0.860092	0	6.259e-08
aTAADVDAEIQQALTNEVk	4	1	1	P51427	N-Term(Acetyl); K19(iTRAQ8plex)	1.96907	0.869441	0.793492	0.733846	0.857648	0.655651	0	7.998e-11
fVIQGFGNVGSWAAk	3	2	1	Q43314	N-Term(iTRAQ8plex); K15(iTRAQ8plex)	1.07999	1.17786	1.17619	0.878137	0.820327	0.791281	0	2.467e-10
dVVFEFPITEA	1	1	1	Q9C514	N-Term(iTRAQ8plex)	1.27551	0.937162	1.22647	0.66628	0.898363	0.911006	0	4.654e-05
gNLLYTAYGSAGQWGLFDR	1	1	1	P82281	N-Term(iTRAQ8plex)	1.16371	1.23125	1.17065	0.721943	0.821678	0.808589	0	3.871e-11
aASFNIIPSSTGAAk	8	5	2	P25858;Q9FX54	N-Term(iTRAQ8plex); K15(iTRAQ8plex)							0	2.359e-14
sLGLGDLDFSAVIEAVk	3	1	1	Q9LSV0	N-Term(iTRAQ8plex); K17(iTRAQ8plex)	1.01349	1.04703	1.18191	0.758725	0.945861	1.03256	0	9.11e-09
kVYVGQGEDGIAFVk	2	1	1	O49326	N-Term(iTRAQ8plex); K1(iTRAQ8plex); K15(iTRAQ8plex)	0.904879	0.953853	1.0234	1.05553	1.217	0.938965	0	4.471e-10
dISPPLEWYNVPEGTk	7	1	1	Q9M042	N-Term(iTRAQ8plex); K16(iTRAQ8plex)	1.00218	1.031	1.02893	0.934612	1.04158	1.03018	0	1.095e-08
tNPTNPAIELGPEFk	2	2	1	P57751	N-Term(iTRAQ8plex); K15(iTRAQ8plex)	1.08996	1.13754	1.24677	0.78012	0.795147	0.880059	0	2.066e-13
aSDVAQPLVEADIPFk	3	1	1	C0Z2J1	N-Term(iTRAQ8plex); K16(iTRAQ8plex)	1.05409	1.02277	1.01948	1.02634	0.973446	0.925673	0	2.838e-09
gSDWLGDQDAIQYMcR	2	2	1	O82663	N-Term(iTRAQ8plex); C15(Carbamidomethyl)	1.2049	1.03341	1.08707	0.773024	0.924627	0.90359	0	2.495e-10
lFESLDPEEQk	18	1	1	Q941A4	N-Term(iTRAQ8plex); K11(iTRAQ8plex)	1.19144	1.21026	1.16951	0.767607	0.763509	0.806875	0	8.629e-09
aVEENLSIDQIk	3	1	1	Q9FK91	N-Term(iTRAQ8plex); K12(iTRAQ8plex)	0.922212	1.14865	1.00963	0.968628	1.04179	0.896774	0	1.415e-11
gVGWDVSAIGNAVWGGAk	2	2	1	Q9S850	N-Term(iTRAQ8plex); K18(iTRAQ8plex)	1.26007	1.27746	1.06448	0.773196	0.842482	0.680385	0	7.865e-12
sFEAQQHLAEGR	22	2	1	Q02973	N-Term(iTRAQ8plex)	0.708753	0.639688	0.684653	1.36768	1.41111	1.39568	0	1.151e-09
vLNQLLTEMDGMNAk	5	3	2	P54609;Q9SCN8	N-Term(iTRAQ8plex); K15(iTRAQ8plex)							0	6.643e-11
dLIGPAMYFGLMGDGQPIGR	2	1	1	Q9LFW1	N-Term(iTRAQ8plex)	0.911793	1.24681	0.884344	0.991646	1.0889	0.916295	0	8.01e-10
sIISGELPVGWEk	3	1	1	F4IW47	N-Term(iTRAQ8plex); K13(iTRAQ8plex)	1.01111	1.12454	1.02392	0.839212	1.01272	0.94759	0	4.578e-08
tTVITQGADPVVVAEDGk	3	3	2	Q9LZG0;Q9SF85	N-Term(iTRAQ8plex); K18(iTRAQ8plex)							0	1.539e-10
cVSDTNcENVcHNEGFPGGDcR	3	1	1	Q41914	N-Term(iTRAQ8plex); C1(Carbamidomethyl); C7(Carbamidomethyl); C11(Carbamidomethyl); C21(Carbamidomethyl)	1.26023	0.776754	1.29497	0.876171	0.932667	0.801121	0	8.486e-16
yGEEINcAVIPR	3	1	1	Q9SMT7	N-Term(iTRAQ8plex); C7(Carbamidomethyl)	1.17004	1.02955	1.13215	0.821963	0.916416	0.888351	0	1.152e-07
sGGLGDLNYPLISDVTk	6	1	1	Q96291	N-Term(iTRAQ8plex); K17(iTRAQ8plex)	0.912646	1.14928	1.01954	0.998849	1.02988	0.88701	0	2.668e-10
vVEGTTQVVSGTk	1	1	1	Q84WT8	N-Term(iTRAQ8plex); K13(iTRAQ8plex)	1.02743	1.31087	1.07547	0.88033	0.912271	0.775794	0	9.983e-11
aVGPGLNTAR	20	1	1	Q9S7I3	N-Term(iTRAQ8plex)	0.65236	0.713821	0.632852	1.35719	1.52106	1.39707	0	2.953e-05
vIPGYGHGVLR	2	1	1	P20115	N-Term(iTRAQ8plex)	1.00305	1.13838	1.09989	0.979296	0.92557	0.863704	0	9.88e-07
hGNGLEETIcSAR	1	2	1	P15455	N-Term(iTRAQ8plex); C10(Carbamidomethyl)	0.919276	0.863211	0.754732	1.0144	1.08494	1.50183	0	8.217e-11
gGAPADFQPSFQGGGGR	1	2	1	F4JTD3	N-Term(iTRAQ8plex)	1.10888	1.21242	1.08165	0.822648	0.970867	0.772652	0	2.978e-13
aQLVSNINAcTAVGDVVR	1	1	1	Q9SF16	N-Term(iTRAQ8plex); C10(Carbamidomethyl)	0.913882	0.898083	1.13989	1.06365	1.12742	0.94408	0	9.376e-10
gTSDTVPEQLDYAk	19	1	1	Q42431	N-Term(iTRAQ8plex); K14(iTRAQ8plex)	1.02981	1.11702	1.07626	0.955039	0.989593	0.872509	0	1.739e-06
cFVGGLAWATDDR	6	4	1	Q03250	N-Term(iTRAQ8plex); C1(Carbamidomethyl)	1.10567	0.929899	1.10576	0.9453	0.837653	0.877688	0	6.744e-11
iPALYQTDPSGTFSAWk	5	2	1	Q2V3Q0	N-Term(iTRAQ8plex); K17(iTRAQ8plex)	1.0634	1.0824	1.01862	0.874538	0.935435	1.042	0	1.897e-08
lNITAVPTLHFFk	2	1	1	O64764	N-Term(iTRAQ8plex); K13(iTRAQ8plex)	0.672656	0.736262	0.78537	1.30627	1.50361	1.25702	0	7.047e-09
cFVGGLAWATDDR	1	4	1	Q03250	C1(Carbamidomethyl)							0	0.0002128
gLcAIAQAESLR	4	4	3	Q9SIP7;Q9M339;Q9FJA6	N-Term(iTRAQ8plex); C3(Carbamidomethyl)							0	7.248e-08
aFVSEYAVNk	3	1	1	Q8VZR2	N-Term(iTRAQ8plex); K10(iTRAQ8plex)	1.13774	0.964451	0.94023	1.0783	1.02105	0.928814	0	2.327e-08
yHTVFDFGNEQVGFAEAV	42	1	1	Q8VYL3	N-Term(iTRAQ8plex)	0.778437	0.738899	0.852844	1.28241	1.14298	1.31179	0	2.241e-07
sVIcPLELDEAk	1	1	1	Q940G0	N-Term(iTRAQ8plex); C4(Carbamidomethyl); K12(iTRAQ8plex)	1.09816	1.19832	1.13174	0.878776	0.875354	0.78529	0	3.258e-10
dIAVQGNVDPGVLFGSk	1	2	1	O22886	N-Term(iTRAQ8plex); K17(iTRAQ8plex)	0.913665	1.00405	0.946085	1.11424	1.03436	1.09207	0	4.898e-10
eFQQDQHLR	32	1	1	P15460	N-Term(iTRAQ8plex)	0.731565	0.669693	0.703888	1.32496	1.35948	1.35051	0	6.696e-07
aGANVVVLDSSQGNSIYQLEMIk	1	2	1	Q8GXQ8	N-Term(iTRAQ8plex); K23(iTRAQ8plex)	0.822202	0.977232	0.851966	1.14506	1.35132	1.01942	0	2.445e-11
eTNLcLAADVGTAAELLDIADk	1	2	1	Q42586	N-Term(iTRAQ8plex); C5(Carbamidomethyl); K22(iTRAQ8plex)	0.960645	0.961965	1.23104	0.945371	0.841989	1.08039	0	1.519e-11
aPPASPPTAAVEAPVSVEk	4	1	1	Q9C8P0	N-Term(iTRAQ8plex); K19(iTRAQ8plex)	0.872022	0.898786	0.948039	1.13763	1.16877	1.08778	0	7.777e-09
lPFTGTGTEQGQDR	4	3	1	Q8RY15	N-Term(iTRAQ8plex)	0.774083	0.736266	0.694796	1.37962	1.34089	1.3127	0	4.81e-07
hILQQLETMNIVELDTk	4	1	1	Q9SGA6	N-Term(iTRAQ8plex); K17(iTRAQ8plex)	0.907179	1.02687	1.01493	1.05093	1.05205	0.99278	0	8.955e-13
tAGGLLLTETTk	3	1	1	O65282	N-Term(iTRAQ8plex); K12(iTRAQ8plex)	0.881647	0.929005	0.965329	1.19775	0.980488	1.26536	0	5.461e-10
aLESANLGGDk	3	2	1	P52410	N-Term(iTRAQ8plex); K11(iTRAQ8plex)	1.06009	1.3146	1.00317	0.8487	0.858833	0.852947	0	1.681e-11
lMGVTMLDVVR	2	1	1	O82399	N-Term(iTRAQ8plex)	1.15005	1.20933	1.04031	0.858968	0.763077	0.928728	0	3.673e-07
tTPSYVAFTDSER	4	6	4	P22954;O65719;P22953;Q9LHA8	N-Term(iTRAQ8plex)							0	5.623e-08
vSSVEVDLPAMLAQk	4	2	2	Q9M5K2;Q9M5K3	N-Term(iTRAQ8plex); K15(iTRAQ8plex)							0	2.145e-08
hVELTVPLEELIDR	3	1	1	Q8H7F6	N-Term(iTRAQ8plex)	1.12481	1.01717	1.13373	0.922065	0.919371	0.801539	0	1.096e-09
aGLEAPLEQxHk	12	3	1	Q9STY6	N-Term(iTRAQ8plex); X10(L); K12(iTRAQ8plex)	0.840307	0.832243	0.934607	1.19097	1.33462	1.0199	0	1.733e-08
iQQVGEcPFQTTIPFFPPYY	3	1	1	P15459	N-Term(iTRAQ8plex); C7(Carbamidomethyl)	0.717078	0.413694	0.582956	1.48275	1.75947	1.4757	0	2.948e-10
eILGTcVSVGcTVDGk	2	3	2	Q9LFH5;Q9FF52	N-Term(iTRAQ8plex); C6(Carbamidomethyl); C11(Carbamidomethyl); K16(iTRAQ8plex)							0	2.081e-10
sWQPTDFLPEPESEGFYDQVk	3	2	2	Q9M879;Q9LF04	N-Term(iTRAQ8plex); K21(iTRAQ8plex)							0	7.455e-07
aADLDIAGIMGMGFPPYR	5	1	1	Q9ZPI5	N-Term(iTRAQ8plex)	1.13672	1.09754	1.08835	0.779523	0.918028	0.860921	0	7e-11
nWLDDQLLLQk	3	1	1	Q9FNA3	N-Term(iTRAQ8plex); K11(iTRAQ8plex)	1.01287	1.04568	1.142	1.01227	0.924274	0.919273	0	3.757e-08
fATQLQQLQEMGFYDR	2	1	1	Q9SII9	N-Term(iTRAQ8plex)	0.837249	0.807652	1.05889	1.30002	0.82676	1.30655	0	1.84e-14
lVLMSTEEVLEDSk	1	3	1	Q9FJM8	N-Term(iTRAQ8plex); K14(iTRAQ8plex)	1.30422	0.920548	0.914552	0.828029	0.88234	1.12736	0	3.808e-08
dNDLPTDSPYMATGTLEDYk	3	1	1	Q8S8R1	N-Term(iTRAQ8plex); K20(iTRAQ8plex)	0.631488	0.695639	0.633424	1.3461	1.71303	1.30888	0	3.479e-11
qIGMFcYSGLTPEQVDR	1	2	1	P46643	N-Term(iTRAQ8plex); C6(Carbamidomethyl)	0.965694	0.883427	0.997386	0.986337	1.01128	1.23608	0	3.159e-11
sHPGNPAIAEFDWTTSGTPR	1	1	1	Q9LW00	N-Term(iTRAQ8plex)	0.96659	0.961454	1.11927	1.00503	1.14158	0.868813	0	6.716e-12
iISQLEQV	1	2	1	Q9C5C4	N-Term(iTRAQ8plex)	1.03834	1.05984	1.03588	1.04824	0.780784	1.06692	0	0.0004007
aVEEGYDISk	8	1	1	Q9FGT8	N-Term(iTRAQ8plex); K10(iTRAQ8plex)	0.927622	0.832077	0.842902	1.12188	1.31938	1.07845	0	2.036e-08
vNDSLDDLSLDIPNAk	1	3	1	Q8LDN5	N-Term(iTRAQ8plex); K16(iTRAQ8plex)	0.873693	0.835829	0.981768	1.22437	0.986144	1.23899	0	6.701e-09
gIPIIGGGAGTGISAk	1	3	1	Q9FJZ7	N-Term(iTRAQ8plex); K16(iTRAQ8plex)	0.923115	1.20987	0.919505	0.941969	1.08995	0.977459	0	3.293e-09
eGQSIGVIPEGIDk	2	3	1	Q9FKW6	N-Term(iTRAQ8plex); K14(iTRAQ8plex)	0.829167	1.01227	0.875626	1.06701	1.20966	1.08939	0	4.909e-08
lGWASLWVGDEAGk	2	1	1	O80565	N-Term(iTRAQ8plex); K14(iTRAQ8plex)	1.11864	1.12319	1.19014	0.748942	0.815103	0.927367	0	4.272e-11
gTEIVDVEPE	1	1	1	Q9FK91	N-Term(iTRAQ8plex)	1.06561	0.979219	0.880444	1.00636	1.12969	1.01041	0	4.889e-05
iIAEYIWIGGSGMDIR	7	3	2	Q9LVI8;Q8GXW5	N-Term(iTRAQ8plex)							0	5.883e-10
fSDGLIAPDFLAk	1	1	1	Q8W4H8	N-Term(iTRAQ8plex); K13(iTRAQ8plex)	0.57603	0.65969	0.656467	1.4411	1.56728	1.44621	0	7.721e-07
fQGmHGQQQVQHVFQTAk	27	1	1	Q9FH31	N-Term(iTRAQ8plex); M4(Oxidation); K18(iTRAQ8plex)	0.51059	0.542122	0.54179	1.53561	1.69215	1.52324	0	5.19e-10
dVSGEVAAIGTSVk	1	2	1	Q8LBA4	N-Term(iTRAQ8plex); K14(iTRAQ8plex)	0.907363	0.832744	0.967131	1.13418	1.2091	1.08607	0	3.754e-11
gVTAFGFDLVR	4	2	1	O50008	N-Term(iTRAQ8plex)	1.00574	1.20324	1.00468	0.951654	0.92873	0.870434	0	1.073e-07
eFATQYEVQGFPTIk	8	2	1	Q9XI01	N-Term(iTRAQ8plex); K15(iTRAQ8plex)	1.01564	1.1894	1.07471	0.857635	1.01644	0.892633	0	4.05e-13
vAINEIAESIMAFNTNYk	2	2	1	C0Z325	N-Term(iTRAQ8plex); K18(iTRAQ8plex)	0.862704	1.024	0.778755	1.08738	1.28797	1.0901	0	2.42e-10
sHENIDDPAR	30	1	1	Q96318	N-Term(iTRAQ8plex)	0.837671	0.863232	0.851948	1.19814	1.18942	1.1486	0	7.521e-06
sGSQAAHAVVTAIVEGGYR	2	3	1	Q8GXW0	N-Term(iTRAQ8plex)	0.823194	0.967731	0.831698	1.10772	1.30462	1.08074	0	3.124e-13
nVLTQFWGMDFTTDk	3	1	1	Q42262	N-Term(iTRAQ8plex); K15(iTRAQ8plex)	0.881671	1.08928	0.961669	1.14187	1.02598	1.06547	0	1.228e-10
lGLIDALVPPGDVLSTSR	7	2	1	Q9ZPI6	N-Term(iTRAQ8plex)	1.09203	1.13923	1.01289	0.989736	0.846081	0.756549	0	7.888e-14
tIAVPEGFDYELYNR	8	1	1	Q9SRT9	N-Term(iTRAQ8plex)	1.07305	1.03129	1.0546	0.907678	0.962652	0.924138	0	5.719e-10
gMGLSVGTMIAGWDETGPGLYYVDNEGGR	1	3	1	O23717	N-Term(iTRAQ8plex)	0.774194	0.841102	0.761019	1.7832	0.686427	1.40781	0	8.468e-11
vPTVDVSVVDLTVR	11	5	2	P25858;Q9FX54	N-Term(iTRAQ8plex)							0	3.326e-07
vDISTIGITSFEGPEGk	4	3	1	Q9SGC1	N-Term(iTRAQ8plex); K17(iTRAQ8plex)	1.16187	1.04044	1.17177	0.845614	0.853716	0.907534	0	8.52e-10
qTQGSGFGPFFYLPk	4	1	1	Q9LZC3	N-Term(iTRAQ8plex); K15(iTRAQ8plex)	0.954363	1.04553	1.01674	1.0283	0.968768	0.979208	0	4.677e-07
eNNIGDEVGWSk	3	3	1	Q9LZK7	N-Term(iTRAQ8plex); K12(iTRAQ8plex)	0.971886	0.945153	0.913963	1.14565	1.0076	1.137	0	1.455e-09
eQVVAGTLHHLTLEILEAGQk	7	1	1	Q8H0X6	N-Term(iTRAQ8plex); K21(iTRAQ8plex)	0.751757	0.875433	0.755667	1.13031	1.47089	1.19435	0	2.62e-15
kYGQDATNVGDEGGFAPNIQENk	1	3	1	P25696	N-Term(iTRAQ8plex); K1(iTRAQ8plex); K23(iTRAQ8plex)	0.8795	1.27746	1.06218	0.879795	1.06131	0.872762	0	5.934e-16
EyQIIDMLIGPTLk	3	2	1	P49688	Y2(iTRAQ8plex); K14(iTRAQ8plex)	0.936418	1.40567	0.902077	0.929255	1.08285	0.76608	0	9.015e-09
gLNPASAILk	2	1	1	Q9FJP9	N-Term(iTRAQ8plex); K10(iTRAQ8plex)	1.05679	0.997333	1.03849	0.962463	1.04011	0.928023	0	2.889e-09
acNLNLEEQk	2	2	1	F4JCI4	N-Term(iTRAQ8plex); C2(Carbamidomethyl); K10(iTRAQ8plex)	0.893823	1.03767	1.07228	1.30223	0.963247	0.803154	0	1.964e-10
tGGFLSQTGEHVk	22	2	1	Q9LW12	N-Term(iTRAQ8plex); K13(iTRAQ8plex)	0.633245	0.753559	0.651565	1.48965	1.31608	1.31938	0	3.072e-11
mLAVLEQNILWVNPDcGLk	2	2	1	O50008	N-Term(iTRAQ8plex); C16(Carbamidomethyl); K19(iTRAQ8plex)	1.01785	1.21928	1.08445	1.0596	0.84204	0.75406	0	3.18e-10
vITEGEDQA	1	4	1	Q8L8Y0	N-Term(iTRAQ8plex)	1.22334	1.11699	1.07866	0.836498	0.942391	0.755458	0	0.0007107
eSFcFMYSVENPAFR	2	1	1	Q94FY7	N-Term(iTRAQ8plex); C4(Carbamidomethyl)	1.25849	1.02235	1.11545	0.780792	0.865877	0.871017	0	2.69e-10
tVTAMDVVYALk	4	2	1	P59259	N-Term(iTRAQ8plex); K12(iTRAQ8plex)	0.933313	1.15903	0.943241	0.948823	1.08644	0.915439	0	2.538e-09
gTVHLIGLLSDGGVHSR	2	2	1	Q9M9K1	N-Term(iTRAQ8plex)	0.975878	0.877518	0.895227	0.978386	1.06973	1.2586	0	1.017e-09
iFVGGLPPALTSDEFR	2	1	1	O22791	N-Term(iTRAQ8plex)	0.999448	0.854663	0.96082	1.13672	0.918863	1.20826	0	2.844e-09
tSPLSDLLNLDLSDTk	1	1	1	Q8GXW5	N-Term(Acetyl); K16(iTRAQ8plex)	1.13112	1.12331	1.15979	0.802529	0.88991	0.848497	0	6.471e-08
aVWGPLNQTIVSGGEDk	1	3	1	Q38884	N-Term(iTRAQ8plex); K17(iTRAQ8plex)	0.679671	0.734851	0.803417	1.83102	1.24122	1.03272	0	1.149e-10
nLAPSSEGGGEPPk	5	2	1	O81235	N-Term(iTRAQ8plex); K14(iTRAQ8plex)	0.952339	1.12205	0.937931	1.03701	1.00413	1.08543	0	5.87e-08
aVMIGLSQAGSVGEIDINR	1	4	1	Q9FFQ2	N-Term(iTRAQ8plex)	1.00996	0.924182	1.07788	0.922793	0.929343	1.17497	0	1.796e-10
lDSFVANFIk	2	1	1	Q9FK91	N-Term(iTRAQ8plex); K10(iTRAQ8plex)	0.943714	1.5437	1.08609	0.899126	0.723565	0.76195	0	4.771e-08
tQSFLTWESLESVR	1	1	1	Q945K7	N-Term(iTRAQ8plex)	0.988637	1.11378	1.00792	1.0039	0.899397	1.02738	0	3.374e-09
dGVDVDLLHDAAR	1	1	1	Q1H595	N-Term(iTRAQ8plex)	1.11817	1.02563	0.981108	1.10307	0.839671	0.96612	0	1.627e-10
FNTLETTLTR	8	2	1	Q96318								0	7.71e-05
aADVGADLVGk	4	2	1	P31414	N-Term(iTRAQ8plex); K11(iTRAQ8plex)	1.0413	1.116	1.04358	0.884879	1.00772	0.893608	0	5.43e-08
eTAQGAAQYTk	32	2	1	Q9LW12	N-Term(iTRAQ8plex); K11(iTRAQ8plex)	0.654131	0.699288	0.70652	1.34174	1.53169	1.27528	0	1.804e-10
rPGGGSGEGWEEESTNHPYHFR	14	1	1	Q9LUJ7	N-Term(iTRAQ8plex)	0.835146	1.00029	0.755098	1.21377	1.212	1.08432	0	1.459e-14
tQLAVIVPSVSPAVTEk	4	3	1	Q9FWQ7	N-Term(iTRAQ8plex); K17(iTRAQ8plex)	0.942381	0.914131	0.866283	1.04956	1.14769	1.10016	0	1.7e-09
qELYQWDTVADSAR	4	2	1	Q9S7Y7	N-Term(iTRAQ8plex)	1.03003	1.06337	0.97618	1.01755	0.939723	0.94191	0	6.454e-13
iSADEGVLALWk	2	1	1	Q9C5M0	N-Term(iTRAQ8plex); K12(iTRAQ8plex)	0.994767	1.13579	1.08832	0.959876	0.999054	0.813283	0	5.149e-09
eAFDVAYDNIYAFHLAQk	1	1	1	Q9C5U8	N-Term(iTRAQ8plex); K18(iTRAQ8plex)	1.09515	1.11054	0.998626	0.884927	0.934711	0.979263	0	6.778e-11
yVSAGSIEYWPDPQR	8	2	1	C0Z2G4	N-Term(iTRAQ8plex)	0.988425	1.12255	1.07431	0.930824	0.930909	1.02646	0	5.008e-12
fSQQETMLSMTPSSSS	18	1	1	Q9ZWA9	N-Term(iTRAQ8plex)	0.86624	0.826499	0.877145	1.20119	1.09329	1.20835	0	3.145e-08
vkDEIVLDGNDIELVSR	2	4	1	P49209	N-Term(iTRAQ8plex); K2(iTRAQ8plex)	0.915116	1.11672	1.00157	0.965506	1.05097	1.00687	0	5.681e-12
lVVIVDVVDQNR	7	2	2	Q9T043;Q9SIM4	N-Term(iTRAQ8plex)							0	3.701e-07
aDVEPEVAAAGVPk	3	4	2	Q9FY64;B0FV99	N-Term(Acetyl); K14(iTRAQ8plex)							0	4.935e-08
sGGLDMSLDDIIk	1	1	1	Q8L719	N-Term(Acetyl); K13(iTRAQ8plex)	1.075	0.829946	0.810321	1.03727	1.28938	1.06968	0	9.608e-07
aGAGSATLSMAYAAAR	1	2	1	Q9SN86	N-Term(iTRAQ8plex)	1.00736	0.898471	1.04709	0.958218	1.00435	1.1412	0	5.108e-11
eIFMPALSSTMTEGk	4	2	2	Q9SQI8;Q9C8P0	N-Term(iTRAQ8plex); K15(iTRAQ8plex)							0	5.014e-11
sIITTENLSSPFDFNR	2	1	1	Q8VZ50	N-Term(iTRAQ8plex)	0.866421	0.820205	0.818068	1.28186	1.16205	1.22331	0	4.944e-10
gVTSNPAIFQk	3	1	1	Q9LYR4	N-Term(iTRAQ8plex); K11(iTRAQ8plex)	1.12355	1.10144	1.10592	0.838627	0.974908	0.788601	0	2.153e-08
iSGQIPSSISNLVELVR	1	1	1	Q9FHL8	N-Term(iTRAQ8plex)	1.03693	1.27346	0.924526	0.87356	1.1018	0.80717	0	1.664e-09
acQQLmLQQAR	38	1	1	P15457	N-Term(iTRAQ8plex); C2(Carbamidomethyl); M6(Oxidation)	0.791738	0.746929	0.795221	1.26156	1.31808	1.28999	0	7.308e-08
fLLQGVIASPGVTAk	2	1	1	Q8VZ95	N-Term(iTRAQ8plex); K15(iTRAQ8plex)	0.958745	1.12188	0.98006	1.00545	1.06153	0.929818	0	6.166e-10
mTPTkPMVVETFSEYPPLGR	60	8	1	Q8GTY0	N-Term(iTRAQ8plex); K5(iTRAQ8plex)	1.04099	1.0225	1.06172	0.94541	1.02301	0.92376	0	4.614e-10
yAGSSNWTVQEAAEcVk	10	1	1	Q9SLA8	Y1(iTRAQ8plex); C15(Carbamidomethyl); K17(iTRAQ8plex)	1.16142	1.09274	1.23261	0.929469	0.822679	0.777089	0	9.958e-11
sSLYYVNLVAIR	4	2	1	Q9FL43	N-Term(iTRAQ8plex)	1.09915	1.02555	1.00255	0.932285	0.963348	0.983604	0	1.03e-07
wVEILSEPR	3	7	1	B9DHU0	N-Term(iTRAQ8plex)	1.17077	1.21321	1.06943	0.832643	0.751131	0.85342	0	9.6e-06
gVVTEIIHDPGR	3	3	2	Q42064;P46286	N-Term(iTRAQ8plex)							0	2.748e-07
lSLTDIVIDINR	4	2	2	Q9T043;Q9SIM4	N-Term(iTRAQ8plex)							0	6.235e-07
iVIITGGASGIGADAAR	3	1	1	O80714	N-Term(iTRAQ8plex)	0.807293	0.605498	0.928278	1.29863	1.28644	1.38505	0	7.982e-09
gGFALPTFTHR	5	2	1	Q8LDH6	N-Term(iTRAQ8plex)	0.938743	0.812147	0.882439	1.1936	1.17962	1.20522	0	8.439e-07
gASINNLEAGSDGR	2	4	1	F4I576	N-Term(iTRAQ8plex)	0.998883	1.0076	0.987838	0.976273	1.14492	0.947638	0	3.512e-10
sVFASAVVGk	6	1	1	O49326	N-Term(iTRAQ8plex); K10(iTRAQ8plex)	0.822222	0.808622	0.816116	1.18678	1.27866	1.16426	0	5.929e-09
mEVVDIDAR	1	2	1	Q9C5Z1	N-Term(Acetyl)							0	8.106e-05
dNYAQEFGIk	2	1	1	O04379	N-Term(iTRAQ8plex); K10(iTRAQ8plex)	0.966228	0.957067	0.983484	1.09714	1.08069	1.00286	0	1.609e-05
gLMPFFDSAYQGFASGSLDTDAkPIR	2	1	1	P46644	N-Term(iTRAQ8plex); K23(iTRAQ8plex)	0.891439	1.10172	0.918141	1.11291	1.12739	0.933049	0	2.057e-11
aVLTNIQAEk	3	2	1	O82514	N-Term(iTRAQ8plex); K10(iTRAQ8plex)	0.680819	0.942777	0.742091	1.19111	1.47622	1.15776	0	1.972e-09
sNIDIEGILk	2	3	1	Q9FNN1	N-Term(Acetyl); K10(iTRAQ8plex)	1.00829	1.07385	1.16597	0.841546	0.921315	0.976409	0	6.982e-06
rDFGEEYGEER	5	3	1	Q9SIN3	N-Term(iTRAQ8plex)	1.0641	1.00051	1.02382	1.05135	1.02419	0.964201	0	3.407e-06
dVSQDGNFGLDIFVcGDQIR	1	3	1	Q9FVC4	N-Term(iTRAQ8plex); C15(Carbamidomethyl)	1.11077	0.851824	0.932489	0.955017	1.11045	1.09972	0	4.016e-10
sWQPQDFLPDPASDGFEDQVR	2	2	1	O22832	N-Term(iTRAQ8plex)	0.863569	0.984667	0.940136	0.994107	0.970581	1.32011	0	2.725e-12
gVTMTALLAk	3	3	2	Q9SQI8;Q9C8P0	N-Term(iTRAQ8plex); K10(iTRAQ8plex)							0	3.19e-08
rGDVFASLAGVSQWWYNR	5	1	1	Q9ZWA9	N-Term(iTRAQ8plex)	1.01563	0.917597	1.01863	1.17405	0.995635	0.953615	0	7.834e-13
iTGITGYEEYPASPNVAVGEVNL	1	1	1	P51412	N-Term(iTRAQ8plex)	0.94045	0.971355	0.818271	1.0665	1.10011	1.22193	0	5.044e-07
gAcLALTAR	9	1	1	P0DKC6	N-Term(iTRAQ8plex); C3(Carbamidomethyl)	1.0804	1.05729	1.00165	0.914551	1.0757	0.875963	0	1.348e-05
mADAVGYAGmk	42	1	1	Q42431	N-Term(iTRAQ8plex); M10(Oxidation); K11(iTRAQ8plex)	1.04955	1.14972	1.08081	0.912975	0.93355	0.821907	0	1.234e-07
tSQTAQAAQQk	13	2	1	Q9LW12	N-Term(iTRAQ8plex); K11(iTRAQ8plex)	0.669169	0.795474	0.730251	1.41112	1.19272	1.22377	0	2.118e-10
dTYLNTEEFIDAVAAELk	1	2	1	Q9SRZ6	N-Term(iTRAQ8plex); K18(iTRAQ8plex)	1.19436	1.25886	1.0902	0.824076	0.890326	0.679022	0	5.009e-09
mDSVFSNVAR	2	1	1	P46645	N-Term(Acetyl)							0	1.225e-05
vLVDGFEIAk	1	2	2	Q8L7N0;Q9M888	N-Term(iTRAQ8plex); K10(iTRAQ8plex)							0	4.052e-09
eVEAVcNPIITAVYQR	3	3	2	Q9LKR3;Q39043	N-Term(iTRAQ8plex); C6(Carbamidomethyl)							0	3.313e-11
gEWNVAGIAYR	6	2	1	Q9S7E4	N-Term(iTRAQ8plex)	0.930515	0.917095	0.853907	1.02261	1.21408	1.09406	0	2.787e-06
AHIQMVNDNGER	1	1	1	P15456								0	4.271e-06
dSTDFVGINYYTSFFAk	5	1	1	Q9LIF9	N-Term(iTRAQ8plex); K17(iTRAQ8plex)	0.859955	1.32109	0.992524	0.870293	1.12316	0.808817	0	7.734e-11
wSPELAAAcEVWk	5	5	2	O03042;A0A075M556	N-Term(iTRAQ8plex); C9(Carbamidomethyl); K13(iTRAQ8plex)							0	1.681e-08
nYGLFNPDGTPVYSLGIk	1	2	1	F4K020	N-Term(iTRAQ8plex); K18(iTRAQ8plex)	0.900446	0.994526	1.009	1.16277	1.06714	0.97397	0	9.746e-09
lPDSTLSYLDPSTGDVk	4	1	1	Q949U7	N-Term(iTRAQ8plex); K17(iTRAQ8plex)	0.963506	1.34279	1.0597	0.821802	0.944585	0.829852	0	9.838e-08
aASASAADEAMAMILR	1	1	1	Q9SVR1	N-Term(iTRAQ8plex)	1.11983	0.985578	1.27689	0.77903	0.967987	0.829157	0	3.309e-11
dPSTLQYTTVINQR	1	1	1	Q9ZVS5	N-Term(iTRAQ8plex)	0.897916	0.991192	0.936974	1.05293	1.13762	1.09263	0	2.232e-09
aFVDSGAQSTIISk	3	4	1	Q9LTU5	N-Term(iTRAQ8plex); K14(iTRAQ8plex)	1.02261	1.02784	1.00261	0.93136	1.05623	1.01059	0	9.353e-09
aDGLGVSScIER	3	2	1	P52410	N-Term(iTRAQ8plex); C9(Carbamidomethyl)	1.2702	1.18386	1.29985	0.7627	0.671064	0.676096	0	3.396e-08
lLEDNLPLESVYk	5	1	1	Q8L831	N-Term(iTRAQ8plex); K13(iTRAQ8plex)	1.05815	1.14965	1.1857	0.879402	0.938107	0.786036	0	7.219e-08
wEDVEVGEPk	2	2	1	Q9FKG8	N-Term(iTRAQ8plex); K10(iTRAQ8plex)	1.00479	1.11903	1.13589	0.992061	0.916483	0.842919	0	1.179e-06
lGDYLIESGL	2	2	1	Q42418	N-Term(iTRAQ8plex)	1.07459	1.19706	1.05019	0.748217	0.845426	1.03694	0	8.522e-05
tTIMLADLADFk	4	1	1	Q94JQ4	N-Term(iTRAQ8plex); K12(iTRAQ8plex)	0.903663	0.773823	0.826905	1.08144	1.12695	1.4576	0	1.788e-11
yEDLLAAIEAAR	10	1	1	Q9XFH9	Y1(iTRAQ8plex)	0.885193	0.821022	0.893518	1.32058	0.946358	1.15418	0	7.062e-09
iTPSWVGFTDSER	7	3	2	Q9LKR3;Q39043	N-Term(iTRAQ8plex)							0	2.048e-07
nATNVEEAFMAMTAAIk	3	2	2	Q9FPJ4;Q9SEH3	N-Term(iTRAQ8plex); K17(iTRAQ8plex)							0	4.258e-09
lASINVENVESNRR	2	1	1	Q9SJQ9	N-Term(iTRAQ8plex)	1.09272	0.928572	1.1194	1.06407	0.850097	0.957634	0	4.178e-08
eFLWQEGHTAFATk	1	1	1	Q9M1R2	N-Term(iTRAQ8plex); K14(iTRAQ8plex)	0.912858	1.09966	0.926558	1.00536	1.21005	0.937729	0	2.296e-09
eSDLLALVE	3	2	1	O80504	N-Term(iTRAQ8plex)	1.0422	0.901222	1.03966	1.10084	0.886192	1.13223	0	0.003142
iSTLNSLNLPVLR	21	1	1	Q9ZWA9	N-Term(iTRAQ8plex)	1.00644	0.977355	1.03099	1.07324	0.915687	1.08501	0	1.162e-09
lITYGTVMGGLLSEk	2	2	1	Q9FPJ7	N-Term(iTRAQ8plex); K15(iTRAQ8plex)	1.15057	0.918645	1.11075	1.08967	0.781439	0.951793	0	3.416e-08
aLDAGIVAQAALDVFTk	2	1	1	O49485	N-Term(iTRAQ8plex); K17(iTRAQ8plex)	1.0378	1.07474	1.10187	0.812562	1.09544	0.846334	0	2.006e-09
nNAIVcNIGHFDNEIDMLGLETYPGVk	4	9	2	O23255;Q9LK36	N-Term(iTRAQ8plex); C6(Carbamidomethyl); K27(iTRAQ8plex)							0	3.671e-11
eVNLPIAVLGAEIDQVSPPELVR	2	3	1	Q9LUH1	N-Term(iTRAQ8plex)	1.2299	0.431432	0.722575	1.45159	1.1583	1.13342	0	5.075e-10
nLVLNYGALEPLLAQLNENSk	2	1	1	O80480	N-Term(iTRAQ8plex); K21(iTRAQ8plex)	1.13662	0.944233	1.09258	0.987583	0.908412	0.895062	0	4.328e-11
cGDTIATPSGVAQWFyNNGNEPLILVAAADLASNQNQLDR	1	1	1	P15456	N-Term(iTRAQ8plex); C1(Carbamidomethyl); Y16(iTRAQ8plex)	0.805194	0.819968	0.892682	1.22462	1.18482	1.25738	0	2.213e-13
yAGTEVEFNDVk	3	1	1	O65282	N-Term(iTRAQ8plex); K12(iTRAQ8plex)	0.849614	0.960703	0.889825	1.10362	1.34384	0.996642	0	3.501e-09
mPTLEEYGTNLTk	3	3	1	Q9FI56	N-Term(iTRAQ8plex); K13(iTRAQ8plex)	1.01196	0.90699	0.963142	1.09129	1.1462	1.01924	0	9.668e-07
vFVMGEEVGQYQGAyK	2	1	1	Q38799	N-Term(iTRAQ8plex); Y15(iTRAQ8plex)	1.08647	0.903746	1.06518	0.983786	0.996711	1.00117	0	9.096e-10
aSDQMTGQTFNDVGR	2	4	1	Q9SKP0	N-Term(iTRAQ8plex)	0.735008	0.676244	0.837852	1.28137	1.31087	1.37952	0	2.766e-10
lGSVIGIDLGTTYScVGVYk	1	3	2	Q9LKR3;Q39043	N-Term(iTRAQ8plex); C15(Carbamidomethyl); K20(iTRAQ8plex)							0	1.826e-11
tNENAmISTLAGR	79	2	1	Q96318	N-Term(iTRAQ8plex); M6(Oxidation)	0.845324	0.87382	0.888555	1.21929	1.0418	1.23013	0	3.95e-06
tGEAMGTMGDk	6	2	1	Q96270	N-Term(iTRAQ8plex); K11(iTRAQ8plex)	0.498465	0.514425	0.578349	1.63685	1.61597	1.6342	0	1.601e-10
lVSWYDNEWGYSSR	9	5	2	P25858;Q9FX54	N-Term(iTRAQ8plex)							0	3.906e-10
aNPGPITGGLAPIYGAAGk	1	1	1	Q9C509	N-Term(iTRAQ8plex); K19(iTRAQ8plex)	0.95482	0.933336	1.03562	1.08338	1.06169	1.01826	0	1.207e-07
qVGENQVEESk	9	2	1	Q9SL09	N-Term(iTRAQ8plex); K11(iTRAQ8plex)	0.624596	0.608326	0.750967	1.18716	1.33172	1.39774	0	1.659e-09
nLIVFNLQNPQTEFk	2	1	1	Q38942	N-Term(iTRAQ8plex); K15(iTRAQ8plex)	0.788439	0.721177	0.84062	1.37118	1.14284	1.35323	0	3.279e-09
gLTPLINIQGYVLGNPVTDk	2	1	1	Q8VZU3	N-Term(iTRAQ8plex); K20(iTRAQ8plex)	1.16254	1.22563	1.11998	0.773846	0.901888	0.744475	0	5.272e-10
sFASDVDIEDLGFNSFWR	2	1	1	Q7G191	N-Term(iTRAQ8plex)	0.970897	0.891486	0.937169	1.16498	0.95591	1.17393	0	9.772e-10
aAFGLGTAATVLNTSLFTVDGGER	1	1	1	O04331	N-Term(iTRAQ8plex)	0.892764	0.864267	1.11364	1.08307	1.19769	0.955507	0	4.746e-10
lVEITGIPFLPTPMGk	2	1	1	Q9LF46	N-Term(iTRAQ8plex); K16(iTRAQ8plex)	1.03504	0.991438	0.986233	1.06203	1.11448	0.865826	0	1.051e-10
eAFLEDWEPTNDSLLVIR	3	3	1	O48588	N-Term(iTRAQ8plex)	0.964955	0.945514	0.801441	1.60975	0.903727	0.87132	0	1.34e-11
tVTNVGSPTcEYMVHVEEPk	2	1	1	Q84WS0	N-Term(iTRAQ8plex); C10(Carbamidomethyl); K20(iTRAQ8plex)	0.980905	1.05211	1.01994	1.04291	1.01005	0.945364	0	3.427e-10
iEDVTPIPTDSTR	3	3	3	P42036;Q9CAX6;Q9SIH0	N-Term(iTRAQ8plex)							0	2.895e-10
nIMENPAWYTQYTPYQAEISQGR	1	3	2	O80988;Q94B78	N-Term(iTRAQ8plex)							0	5.669e-10
hETADINTFSWGVADR	3	1	1	Q8GXW5	N-Term(iTRAQ8plex)	0.934131	0.90184	1.00054	1.18574	1.00728	1.05846	0	3.577e-13
lTNYQDILSEck	10	1	1	Q9ZVL0	N-Term(iTRAQ8plex); C11(Carbamidomethyl); K12(iTRAQ8plex)	1.19032	1.06316	1.35861	0.801472	0.785916	0.778565	0	3.807e-11
dVFFVAVSGER	4	1	1	Q9M1J6	N-Term(iTRAQ8plex)	1.02153	0.984992	1.00022	0.952726	1.03255	0.995883	0	1.835e-05
aAVAQAALAYk	5	1	1	Q9LYR4	N-Term(iTRAQ8plex); K11(iTRAQ8plex)	1.00332	1.17913	1.04357	0.89373	0.953692	0.939171	0	3.013e-09
dLQDDFMGGAEIIk	4	1	1	Q9ASR1	N-Term(iTRAQ8plex); K14(iTRAQ8plex)	0.891555	1.03426	1.01722	1.01064	1.17511	0.952193	0	9.586e-15
lILFGGATAIEGGSSSVPGIR	1	1	1	Q8L7U5	N-Term(iTRAQ8plex)	1.15677	1.09993	1.08178	0.752211	0.937037	0.931802	0	3.152e-13
iDTFYYVGLSGFSVGGEk	1	1	1	Q9LS40	N-Term(iTRAQ8plex); K18(iTRAQ8plex)	1.15302	1.01464	1.03388	0.92838	0.940932	0.930692	0	5.569e-10
aLVIGQALAGVPVWk	1	5	1	Q8VYC5	N-Term(iTRAQ8plex); K15(iTRAQ8plex)	1.3049	1.08158	0.993338	0.7043	0.94892	0.900282	0	1.362e-09
fPGIDQITVGENFSPAR	2	1	1	Q9SIP1	N-Term(iTRAQ8plex)	0.973697	1.06302	1.00492	0.978266	1.0157	1.00913	0	5.821e-09
aEATSALR	2	1	1	Q93W05	N-Term(Acetyl)							0	0.001701
sGGADVTMYk	4	3	1	Q9SKP0	N-Term(iTRAQ8plex); K10(iTRAQ8plex)	0.694811	0.743883	0.721282	1.26944	1.42356	1.29123	0	2.177e-07
nLDDTVTDEk	1	1	1	O22173	N-Term(iTRAQ8plex); K10(iTRAQ8plex)	1.1072	1.19587	1.11199	0.760699	0.938797	0.84223	0	1.616e-09
vLGDGLLVMR	3	1	1	Q9ZVJ4	N-Term(iTRAQ8plex)	0.871862	0.889095	0.975799	1.22682	1.05178	1.10639	0	1.295e-06
nTAASVGEITLk	3	2	2	P23321;Q9S841	N-Term(iTRAQ8plex); K12(iTRAQ8plex)							0	4.338e-09
vWLGTFETAEEAALAYDR	1	1	1	Q9LYU3	N-Term(iTRAQ8plex)	1.00299	0.856299	0.902046	0.940721	1.15574	1.23349	0	7.438e-09
qLLTQLGATFk	3	1	1	Q8L8T2	N-Term(iTRAQ8plex); K11(iTRAQ8plex)	0.966769	1.22479	1.08566	0.933416	0.891244	0.861997	0	8.175e-10
sMGLELDAVk	1	2	1	Q9LD43	N-Term(iTRAQ8plex); K10(iTRAQ8plex)	0.968003	1.0971	1.08337	1.01037	1.02534	0.861018	0	1.367e-06
iAEEAGAcAVMALER	3	3	2	O80448;Q8L940	N-Term(iTRAQ8plex); C8(Carbamidomethyl)							0	1.022e-10
dIDEVILVGGSTR	6	2	2	Q9LTX9;Q9STW6	N-Term(iTRAQ8plex)							0	1.915e-10
gFTVLQAcEVAGVDIPR	2	3	1	B9DFQ9	N-Term(iTRAQ8plex); C8(Carbamidomethyl)	0.993361	1.0132	0.983244	1.02218	1.07108	0.975168	0	1.993e-10
iFVGGISYSTDEFGLR	2	1	1	Q9C909	N-Term(iTRAQ8plex)	1.02045	1.05037	1.0445	0.962727	0.999423	0.953045	0	1.668e-08
dAWDIFGWIAGk	5	1	1	O81270	N-Term(iTRAQ8plex); K12(iTRAQ8plex)	0.76344	1.17219	0.740515	1.01655	1.34611	1.00676	0	3.166e-09
yLSTVLFDATR	7	2	1	P47998	Y1(iTRAQ8plex)	1.0566	0.931908	1.22575	1.11857	0.663757	0.975878	0	3.302e-07
sVTMDWLEAHck	3	1	1	P20115	N-Term(iTRAQ8plex); C11(Carbamidomethyl); K12(iTRAQ8plex)	1.12184	1.05581	1.13707	0.845198	0.921849	0.807207	0	5.663e-10
tIIWNGPMGVFEFDk	2	4	1	Q9SAJ4	N-Term(iTRAQ8plex); K15(iTRAQ8plex)	1.13856	1.19212	1.20079	0.759935	0.878216	0.757831	0	2.561e-10
sEEEAWAAGGSGILLR	2	1	1	O82660	N-Term(iTRAQ8plex)	0.989796	0.999136	0.945471	1.04757	1.01431	1.0669	0	6.025e-11
lLAWVGDEILPR	2	1	1	Q8W0Z7	N-Term(iTRAQ8plex)	1.22823	1.19213	1.23133	0.741199	0.724415	0.74183	0	3.036e-07
iVMGLFGEVVPk	4	3	1	F4IX28	N-Term(iTRAQ8plex); K12(iTRAQ8plex)	1.19053	1.24608	1.21974	0.716344	0.832563	0.658323	0	1.775e-07
iQNAGTEVVDAk	3	2	1	Q9SN86	N-Term(iTRAQ8plex); K12(iTRAQ8plex)	0.990631	0.90237	0.99669	1.03325	1.07009	1.04288	0	1.336e-11
vDDHIGVAIAGLTADGR	4	2	1	P34066	N-Term(iTRAQ8plex)	0.872515	0.797742	0.950369	1.24416	1.13549	1.22081	0	4.311e-10
nLDEVIELAk	4	4	1	Q9FKK7	N-Term(iTRAQ8plex); K10(iTRAQ8plex)	1.05744	1.18393	1.03065	0.85535	0.972205	0.884415	0	2.489e-09
gFVQFcYEPIk	6	2	2	Q9ASR1;F4JB05	N-Term(iTRAQ8plex); C6(Carbamidomethyl); K11(iTRAQ8plex)							0	2.952e-08
fLSPGQSEILTADPR	3	1	1	O64631	N-Term(iTRAQ8plex)	0.851532	0.916137	1.07183	1.18624	1.02288	1.07894	0	3.478e-07
dVVSFLSWAAEPEMEER	2	1	1	Q9FKS5	N-Term(iTRAQ8plex)	1.014	1.00876	0.938647	0.984228	1.07404	0.967637	0	3.945e-09
nLIEILEEGHk	1	1	1	O22827	N-Term(iTRAQ8plex); K11(iTRAQ8plex)	0.757856	0.961356	0.735511	1.20075	1.22916	1.31758	0	2.214e-08
gVLQGNAMVLPK	1	2	1	Q96318	N-Term(iTRAQ8plex)	0.766121	0.777331	0.809073	1.34511	1.17186	1.35756	0	1.726e-07
eSMGLNLFNFDVIR	1	1	1	Q9SBA5	N-Term(iTRAQ8plex)	0.877112	0.786672	0.783617	1.25181	1.30711	1.19217	0	8.088e-13
sHIFAVNMFDDFDR	2	4	1	Q9C5Z1	N-Term(iTRAQ8plex)	1.08133	0.948106	1.00005	1.01188	0.876128	1.10989	0	1.109e-08
QELYQWDTVADSAR	1	2	1	Q9S7Y7								0	8.175e-06
fPIFSILEDMLEAPEEQTEk	1	1	1	O81822	N-Term(iTRAQ8plex); K20(iTRAQ8plex)	1.18426	0.946062	1.15207	0.797531	1.07279	0.822301	0	6.23e-12
sESDFLDYAELISQR	2	1	1	Q8GRX2	N-Term(iTRAQ8plex)	0.950855	0.989472	1.02811	0.999297	1.08455	0.991552	0	9.148e-12
fLFcAEAIYk	4	7	2	O03042;A0A075M556	N-Term(iTRAQ8plex); C4(Carbamidomethyl); K10(iTRAQ8plex)							0	9.979e-10
hTFGMATEEEDkEHYPGSTTTTTATTR	9	3	1	Q9LW12	N-Term(iTRAQ8plex); K12(iTRAQ8plex)	0.613551	0.665873	0.621249	1.42368	1.73746	1.29318	0	4.244e-14
iYVGNLPWDVDSGR	2	1	1	Q9FGS0	N-Term(iTRAQ8plex)	1.009	1.05177	1.07269	1.04518	0.89979	0.951198	0	9.893e-10
sFFTISGEVDTk	7	1	1	Q9SRH5	N-Term(iTRAQ8plex); K12(iTRAQ8plex)	1.04685	1.04496	1.10501	0.959818	0.938296	0.841619	0	4.555e-09
dAQETLQMLk	8	1	1	Q9FZ42	N-Term(iTRAQ8plex); K10(iTRAQ8plex)	0.956677	1.19387	0.949626	0.960836	1.0512	0.930946	0	6.404e-09
eIAEAYLGTTIk	1	1	1	O65719	N-Term(iTRAQ8plex); K12(iTRAQ8plex)	0.83388	1.08363	0.893046	1.09509	1.15072	1.07034	0	2.538e-10
mELIDAAFPLLk	6	2	1	P93819	N-Term(iTRAQ8plex); K12(iTRAQ8plex)	0.798013	0.797321	0.888494	1.20345	1.38727	1.12993	0	3.927e-07
tLTAGETPTIVDTDVGR	1	2	1	A0A097PL68	N-Term(iTRAQ8plex)	1.1073	1.0514	0.966525	0.839376	1.01587	1.0305	0	1.505e-10
yETEPSHDWTTLIANk	4	2	1	P42770	N-Term(iTRAQ8plex); K16(iTRAQ8plex)	1.03419	1.10915	1.01167	0.898446	1.02266	0.91517	0	3.628e-10
eIVNSESVVVFSk	5	1	1	Q9FNE2	N-Term(iTRAQ8plex); K13(iTRAQ8plex)	0.740574	0.823255	0.729925	1.29929	1.43177	1.10836	0	1.344e-08
gTAWANAIAk	4	1	1	Q9SHG8	N-Term(iTRAQ8plex); K10(iTRAQ8plex)	1.12902	1.11252	1.20464	0.838061	0.935125	0.793957	0	9.364e-09
sDDTVSMIEAYLR	4	2	1	Q42560	N-Term(iTRAQ8plex)	1.11223	1.11347	1.16257	0.845134	0.952896	0.818794	0	1.341e-07
sSPSTAAVDGVSDk	1	1	1	Q9LIF6	N-Term(iTRAQ8plex); K14(iTRAQ8plex)	0.871417	0.781805	0.885634	1.14612	1.49594	1.00158	0	2.417e-09
kLPFAAAQIGQAFR	1	2	2	O23627;Q0WWW1	N-Term(iTRAQ8plex); K1(iTRAQ8plex)							0	7.392e-11
tLTDNMVVGVSk	2	2	1	B9DI38	N-Term(iTRAQ8plex); K12(iTRAQ8plex)	0.899918	1.06309	1.08512	1.01307	1.03634	0.958553	0	1.113e-08
cIWGQGDGSTIPVYDTPIGk	3	7	3	P32961;O04907;P46010	N-Term(iTRAQ8plex); C1(Carbamidomethyl); K20(iTRAQ8plex)							0	9.178e-12
aAMGEDLFWAIR	2	2	1	Q9FKV0	N-Term(iTRAQ8plex)	0.998295	1.05745	0.835995	1.0911	0.953251	1.13561	0	1.472e-06
nAEALAEYVNk	4	5	1	O22263	N-Term(iTRAQ8plex); K11(iTRAQ8plex)	0.940251	0.97431	1.01176	1.09253	1.00716	1.05915	0	5.486e-10
iVSSTGALSLTEIPk	2	1	1	Q9M5K2	N-Term(iTRAQ8plex); K15(iTRAQ8plex)	0.940383	0.948475	0.987756	0.993079	1.11678	1.07839	0	5.191e-10
eLVNLVVIAGNIDVNk	2	1	1	Q9M111	N-Term(iTRAQ8plex); K16(iTRAQ8plex)	1.05095	1.02374	1.02336	0.94228	1.04063	0.936801	0	6.553e-10
iFGTEGEIITMLR	7	1	1	Q9LIF8	N-Term(iTRAQ8plex)	1.05542	0.982086	0.983605	1.05587	0.908451	1.03034	0	2.282e-08
nFIVIDGSMAELIR	2	2	2	Q94A94;Q949X7	N-Term(iTRAQ8plex)							0	1.547e-09
vFDFLGEQSDFLk	1	1	1	Q9LV09	N-Term(iTRAQ8plex); K13(iTRAQ8plex)	0.914402	0.905801	0.877299	1.18751	1.31086	0.956923	0	7.381e-08
mGAILASGILDAGGR	2	2	2	O48844;Q9MAT0	N-Term(iTRAQ8plex)							0	8.008e-09
sAVPSGASTGIYEALELR	2	1	1	Q9C9C4	N-Term(iTRAQ8plex)	1.04863	1.05798	1.09313	0.96679	0.935941	0.898016	0	4.93e-07
tNMVMVFGEITTAAk	1	1	1	Q9SJL8	N-Term(iTRAQ8plex); K15(iTRAQ8plex)	1.04942	1.16498	1.10837	0.957001	0.872386	0.845048	0	1.679e-10
dPEGMDDVANPk	6	1	1	Q9FWY8	N-Term(iTRAQ8plex); K12(iTRAQ8plex)	0.681173	0.681593	0.635588	1.3435	1.58139	1.38217	0	4.503e-06
nIGVcNFTVTk	6	3	1	Q8GXW0	N-Term(iTRAQ8plex); C5(Carbamidomethyl); K11(iTRAQ8plex)	1.06585	1.08279	1.29532	0.901438	0.761205	0.830936	0	7.898e-10
sLPLQTLIDILk	1	2	1	O64517	N-Term(iTRAQ8plex); K12(iTRAQ8plex)	0.730966	0.825505	0.707434	1.30201	1.53519	1.16007	0	2.161e-09
sVGLELTLDDFQk	2	1	1	Q9LIR4	N-Term(iTRAQ8plex); K13(iTRAQ8plex)	0.89302	1.05	1.01209	0.995251	1.18712	0.93014	0	1.298e-08
fQIGEVFAHVPR	2	2	1	Q8LDK1	N-Term(iTRAQ8plex)	1.06415	1.12107	1.05984	0.885638	1.00738	0.846293	0	3.47e-10
dLGYQQDWNVEFGFAk	2	1	1	Q9LV33	N-Term(iTRAQ8plex); K16(iTRAQ8plex)	1.07836	1.15316	1.14054	0.812381	0.963346	0.806682	0	6.613e-09
mQAVSVDETk	2	2	1	Q9SR67	N-Term(Acetyl); K10(iTRAQ8plex)	0.792929	0.816606	0.787644	1.27311	1.31467	1.2271	0	1.539e-05
nDISLLYSSGASk	2	1	1	Q8W4H8	N-Term(iTRAQ8plex); K13(iTRAQ8plex)	0.681782	0.913434	0.795625	1.2628	1.34053	1.1834	0	4.445e-06
lILGADSPAIR	3	1	1	P46644	N-Term(iTRAQ8plex)	1.09024	1.07874	1.10793	0.923201	0.989438	0.913368	0	1.54e-06
dkAGSYLSETGEAIk	15	2	1	Q9LW12	N-Term(iTRAQ8plex); K2(iTRAQ8plex); K15(iTRAQ8plex)	0.72647	0.531501	0.749573	1.32118	1.6517	1.24191	0	6.157e-12
aNAVALGNYLMSk	6	1	1	O23254	N-Term(iTRAQ8plex); K13(iTRAQ8plex)	1.08318	1.05807	1.05302	0.867307	0.996835	0.908321	0	7.587e-11
vFDWVIPEQDFQALNSITDQk	3	3	1	Q8GXW0	N-Term(iTRAQ8plex); K21(iTRAQ8plex)	1.16739	1.12079	1.11064	0.944356	0.996971	0.766745	0	1.487e-09
lIDAGSTIMQR	3	1	1	Q9C7N3	N-Term(iTRAQ8plex)	1.19708	1.18318	1.14295	0.716599	0.770056	0.822852	0	2.873e-06
qcPSGEGPGWVccLDck	1	2	1	Q9S7Y7	N-Term(iTRAQ8plex); C2(Carbamidomethyl); C12(Carbamidomethyl); C13(Carbamidomethyl); C16(Carbamidomethyl); K17(iTRAQ8plex)	1.16849	1.10389	1.29282	0.76082	0.812154	0.780096	0	4.55e-07
aEIGDLITQLESk	3	1	1	O49629	N-Term(iTRAQ8plex); K13(iTRAQ8plex)	1.05148	1.00061	1.05115	0.92794	1.02696	0.945035	0	7.67e-09
dAAASAQDSLQQTGQQmk	9	1	1	Q9M892	N-Term(iTRAQ8plex); M17(Oxidation); K18(iTRAQ8plex)	0.672545	0.752383	0.709137	1.29499	1.35303	1.3692	0	4.396e-12
hDEQAVTcEDFFAAMR	1	5	1	Q8H0S9	N-Term(iTRAQ8plex); C8(Carbamidomethyl)	1.09539	0.903869	0.895637	1.01446	1.18911	0.977464	0	3.13e-11
mPSAVGYQPTLSTEMGTLQER	3	1	1	P19366	N-Term(iTRAQ8plex)	1.08934	1.00077	1.05367	1.00958	0.856369	1.10196	0	1.401e-10
fSTIETTLTHSSPMSyGR	66	1	1	P15456	N-Term(iTRAQ8plex); Y16(iTRAQ8plex)	0.894275	1.12137	0.911693	1.05006	0.998106	1.03306	0	1.272e-09
lEEWEDEEAAIk	1	1	1	Q9FK91	N-Term(iTRAQ8plex); K12(iTRAQ8plex)	1.00705	1.11472	1.09129	0.927085	0.974942	0.903204	0	7.154e-12
vIDGEDLFVNk	5	3	1	Q8GXW0	N-Term(iTRAQ8plex); K11(iTRAQ8plex)	1.04346	1.12356	1.01428	0.841017	1.05659	0.919932	0	6.965e-10
fYIDTLQVcPLR	2	1	1	F4JVN6	N-Term(iTRAQ8plex); C9(Carbamidomethyl)	0.990489	1.28543	1.09355	0.828681	0.920394	0.863971	0	4.03e-06
lNTDESPATPGQYGVR	2	1	1	O48737	N-Term(iTRAQ8plex)	0.774118	0.749944	0.700926	1.30122	1.39441	1.2931	0	1.227e-11
eYLYEILGEVIk	1	3	1	Q9C550	N-Term(iTRAQ8plex); K12(iTRAQ8plex)	1.06443	1.10252	0.935963	1.04944	1.0978	0.802584	0	1.63e-07
kDQVESVINTIIEGAR	8	1	1	Q9ZST4	N-Term(iTRAQ8plex); K1(iTRAQ8plex)	1.0215	1.06062	1.06097	0.970321	1.00332	0.908742	0	9.552e-12
iIPGFMcQGGDFTR	2	1	1	Q38867	N-Term(iTRAQ8plex); C7(Carbamidomethyl)	0.879338	0.702249	0.820113	1.07336	1.08057	1.44665	0	5.871e-07
lDQLIYIPLPDEDSR	2	2	1	P54609	N-Term(iTRAQ8plex)	1.13305	0.959757	1.1533	0.93847	0.838167	0.936674	0	5.166e-12
qFDGLVDVYR	5	2	1	P31167	N-Term(iTRAQ8plex)	1.08586	1.2934	1.06492	0.971905	0.932824	0.772387	0	2.349e-06
sASSGDDLNEIk	1	2	1	Q9LDZ0	N-Term(iTRAQ8plex); K12(iTRAQ8plex)	0.934044	1.0973	1.31105	0.89998	0.966637	0.792113	0	5.526e-10
gLTFDSGGYNIk	2	5	2	Q944P7;P30184	N-Term(iTRAQ8plex); K12(iTRAQ8plex)							0	4.599e-12
lITADDLDDAAEk	1	3	1	O82662	N-Term(iTRAQ8plex); K13(iTRAQ8plex)	1.07378	1.066	1.08733	0.901424	1.06722	0.814895	0	3.951e-11
gSNmPVSDEGEGETk	1	3	1	Q9SIN3	N-Term(iTRAQ8plex); M4(Oxidation); K15(iTRAQ8plex)	0.720652	0.886887	1.01945	1.19559	1.31841	1.0414	0	1.114e-10
mDPAGASVASAIGGEGEk	1	2	1	Q9LR90	N-Term(Acetyl); K18(iTRAQ8plex)	0.653643	0.759373	0.733307	1.47401	1.3505	1.32496	0	2.054e-08
aVQSGLGTAAVIVMDk	1	1	1	Q9FNN5	N-Term(iTRAQ8plex); K16(iTRAQ8plex)	0.976753	1.08257	0.887611	1.01735	1.14711	0.970985	0	5.041e-11
sPGEGDTSWVDIYNR	1	1	1	P56772	N-Term(iTRAQ8plex)	1.13688	1.18	1.07923	0.810052	0.961899	0.796297	0	3.802e-07
iSNPYGDPNILAEFIAGQLk	2	1	1	P56798	N-Term(iTRAQ8plex); K20(iTRAQ8plex)	1.19326	1.09339	1.07612	0.74972	0.898292	0.929382	0	2.67e-09
aAAAEAATSEPAASA	2	2	1	P25873	N-Term(iTRAQ8plex)	0.86142	0.751027	0.866492	1.26502	1.11898	1.31841	0	1.852e-05
aNGPLHFVIPPPR	41	1	1	Q9ZWA9	N-Term(iTRAQ8plex)	0.95668	0.950595	1.04502	1.04163	1.06867	0.963665	0	3.122e-09
lFEIDPDTTVVGFADMMR	1	1	1	Q9LF04	N-Term(iTRAQ8plex)	1.03324	1.19674	1.10526	0.884794	0.922502	0.848657	0	9.274e-12
aHTDMVTAIATPIDNADIIVSASR	5	1	1	O24456	N-Term(iTRAQ8plex)	0.897364	0.810203	0.878628	1.17221	1.1608	1.24151	0	4.581e-14
fIAPVFADLAk	11	2	1	Q42403	N-Term(iTRAQ8plex); K11(iTRAQ8plex)	1.16432	1.20093	1.11942	0.800498	0.859016	0.683549	0	1.068e-06
gVPLTQLNLASSVk	3	1	1	Q9SMT7	N-Term(iTRAQ8plex); K14(iTRAQ8plex)	0.932391	1.04566	0.961793	0.995327	1.21023	1.00958	0	1.628e-08
lAcGVIGLTPL	3	1	1	O78310	N-Term(iTRAQ8plex); C3(Carbamidomethyl)	1.37726	0.993311	1.18165	0.848325	0.702971	0.811065	0	7.939e-05
rPQEVGAAEAAALPVAGLTALQALTNPAGLk	2	1	1	Q9SV68	N-Term(iTRAQ8plex); K31(iTRAQ8plex)	1.06624	0.765807	0.630697	1.07046	1.37206	1.09948	0	2.379e-15
iIPGYGGGMSSAk	5	1	1	Q9SLA8	N-Term(iTRAQ8plex); K13(iTRAQ8plex)	1.01806	1.04051	1.13178	0.966219	1.01301	0.856818	0	4.963e-09
tAQNVEEAFIk	1	1	1	P92963	N-Term(iTRAQ8plex); K11(iTRAQ8plex)	1.07431	1.04548	1.03031	1.00559	0.953795	0.919073	0	5.27e-08
aLGEEIAALk	4	3	1	Q93XZ7	N-Term(iTRAQ8plex); K10(iTRAQ8plex)	1.00736	1.20121	1.1187	0.80925	0.95536	0.884717	0	3.1e-06
vAVIcGYGDVGk	2	11	2	O23255;Q9LK36	N-Term(iTRAQ8plex); C5(Carbamidomethyl); K12(iTRAQ8plex)							0	4.407e-12
eWVHWIVVDIPGGTNPSR	4	1	1	Q9XFK7	N-Term(iTRAQ8plex)	0.865908	0.728369	0.783925	1.25085	1.30358	1.16604	0	2.688e-14
sYESVYGDAVPVk	4	1	1	O23715	N-Term(iTRAQ8plex); K13(iTRAQ8plex)	0.93601	0.986633	0.883635	1.04538	1.09042	1.10769	0	2.563e-06
gFGHIGVTVDDVHk	3	2	1	Q8H0V3	N-Term(iTRAQ8plex); K14(iTRAQ8plex)	0.988635	0.963499	1.01627	0.971821	1.04138	0.973967	0	1.376e-07
sGETEDNFIADLSVGLASGQIk	3	1	1	Q9C9C4	N-Term(iTRAQ8plex); K22(iTRAQ8plex)	0.988807	1.15423	0.965697	0.807072	1.08889	0.999023	0	3.652e-13
aAATMSWDDGk	2	1	1	Q9LIF8	N-Term(Acetyl); K11(iTRAQ8plex)	0.903072	1.0174	0.973474	1.00784	1.09079	1.09393	0	5.855e-06
iLTDYGFEGHPLR	1	1	1	Q95748	N-Term(iTRAQ8plex)	1.00616	1.09082	1.04559	0.949998	0.955376	0.982127	0	1.121e-09
wIQYDDDNPSMQR	1	2	1	Q949Y0	N-Term(iTRAQ8plex)	0.739511	1.0964	0.706498	1.25156	1.29251	1.11892	0	9.469e-06
aNSEATLGAYk	2	2	1	Q9SJQ9	N-Term(iTRAQ8plex); K11(iTRAQ8plex)	0.931508	1.29157	1.03247	0.863253	1.04097	0.85207	0	4.159e-07
icAAAEQIPLSSLVMGNR	4	1	1	Q9LSP5	N-Term(iTRAQ8plex); C2(Carbamidomethyl)	1.39774	0.84333	1.0864	0.76193	0.781857	0.772571	0	2.626e-11
sGYELQTLTGWLLR	1	1	1	P25851	N-Term(iTRAQ8plex)	1.07609	1.07366	0.921828	0.617849	0.736243	1.55055	0	5.299e-08
iVLEMAGVENALGk	2	1	1	P93014	N-Term(iTRAQ8plex); K14(iTRAQ8plex)	1.08115	1.22287	1.1136	0.83748	0.876957	0.82917	0	7.506e-10
sAQLIGQAIANNQAFLTLR	4	3	3	Q9SIL6;Q9ZNT7;O49460	N-Term(iTRAQ8plex)							0	1.376e-11
mDQTVSENLIQVk	2	1	1	Q6NL24	N-Term(Acetyl); K13(iTRAQ8plex)	1.04587	0.964096	1.03977	0.865398	1.08904	1.01189	0	1.8e-07
mVNHFVQEFk	8	6	4	P22954;O65719;P22953;Q9LHA8	N-Term(iTRAQ8plex); K10(iTRAQ8plex)							0	5.292e-10
eLGITAMHVk	2	2	2	Q9CAX6;Q9SIH0	N-Term(iTRAQ8plex); K10(iTRAQ8plex)							0	1.185e-08
dVLAVMEDFSPEQLGAk	4	2	2	O23627;Q0WWW1	N-Term(iTRAQ8plex); K17(iTRAQ8plex)							0	9.25e-10
lSMLLTDSLNIk	2	1	1	Q9ZPI1	N-Term(iTRAQ8plex); K12(iTRAQ8plex)	1.03187	1.00095	1.0183	1.07603	1.02379	0.904584	0	2.814e-08
fNYGLNTDQAVVAEEEAk	1	2	1	Q9SLM6	N-Term(iTRAQ8plex); K18(iTRAQ8plex)	0.939222	1.04421	0.958692	1.06854	1.06012	1.01625	0	1.06e-10
vLDVIDcTGSGDIDTSTVVk	1	1	1	F4JVN6	N-Term(iTRAQ8plex); C7(Carbamidomethyl); K20(iTRAQ8plex)	1.40461	1.1703	1.05541	0.793872	0.709885	0.752624	0	2.952e-09
mIDPIVNELAQk	5	1	1	O48737	N-Term(iTRAQ8plex); K12(iTRAQ8plex)	0.785062	0.828455	0.828627	1.17076	1.41948	1.1011	0	3.811e-08
dLVGVLEDAIR	4	2	1	P21240	N-Term(iTRAQ8plex)	1.05198	1.10005	0.987898	0.932705	0.915742	0.948393	0	1.011e-06
fGSALNIETLVAAAER	2	2	1	F4HVV7	N-Term(iTRAQ8plex)	1.17161	0.860016	0.972982	1.03069	0.859686	1.0953	0	1.453e-10
nNPVLIGEPGVGk	4	4	2	P42730;Q9LF37	N-Term(iTRAQ8plex); K13(iTRAQ8plex)							0	2.517e-08
dLVLGcGALLPLLNQLNEHAk	1	1	1	Q96321	N-Term(iTRAQ8plex); C6(Carbamidomethyl); K21(iTRAQ8plex)	1.0384	1.16319	0.934341	1.0608	1.00357	0.847575	0	9.728e-12
nPFAPTLHFNYR	1	1	1	Q9LR75	N-Term(iTRAQ8plex)	0.942358	0.956186	1.04195	1.02805	0.906874	1.19432	0	1.608e-08
eAGFLNAVDEVVR	4	1	1	P46309	N-Term(iTRAQ8plex)	0.982468	0.974774	1.03667	0.943717	1.04993	1.05778	0	2.626e-11
gIDENWEAALEHNPEGFAR	1	4	1	Q9LTU5	N-Term(iTRAQ8plex)	0.554307	0.570435	0.66742	3.24041	0.841748	0.6828	0	8.56e-12
qLETTNVSLk	4	1	1	Q93VR3	N-Term(iTRAQ8plex); K10(iTRAQ8plex)	1.01459	1.0336	1.06006	0.962689	1.00178	0.927442	0	3.628e-09
gLPDPPSLPAWLTEQDVR	2	1	1	O81299	N-Term(iTRAQ8plex)	1.43607	0.882688	1.00363	0.755195	0.868099	0.975194	0	1.781e-08
nIEQAQDSYLEWMSLQSQR	1	6	1	A0SVJ6	N-Term(iTRAQ8plex)	1.02046	0.88077	1.01143	1.08449	1.11076	0.976273	0	4.183e-11
aIGVDLLNNPDLVANDAVIAFk	1	1	1	P19171	N-Term(iTRAQ8plex); K22(iTRAQ8plex)	0.780917	0.582317	0.733745	1.37627	1.54009	1.27112	0	7.497e-09
tNVIGTLNMLGLAk	1	4	1	Q9FIE8	N-Term(iTRAQ8plex); K14(iTRAQ8plex)	1.14424	1.09535	1.13367	0.969516	0.810042	0.823847	0	3.546e-09
sDALMLSGESAMGQFPDk	2	1	1	Q9LIK0	N-Term(iTRAQ8plex); K18(iTRAQ8plex)	0.876054	0.886732	0.942143	1.15538	1.10311	1.14882	0	9.454e-11
iAWEEPFGPVVPVLR	1	2	1	Q1WIQ6	N-Term(iTRAQ8plex)	1.21247	1.26983	1.34504	0.725528	0.710874	0.60532	0	1.479e-11
mGLMALISSDIPGVNR	1	4	1	O82212	N-Term(iTRAQ8plex)	0.723732	0.965963	1.27861	0.979206	1.04312	1.09734	0	4.899e-09
vLVELAELQDR	2	1	1	P28769	N-Term(iTRAQ8plex)	1.19507	0.982542	1.01155	0.90584	0.959955	0.912316	0	2.394e-07
vLEQLSGQTPVFSk	4	2	1	P42794	N-Term(iTRAQ8plex); K14(iTRAQ8plex)	0.994304	1.07727	1.02631	0.958916	0.998201	0.968701	0	3.843e-09
eMIVVHPDADFLNDITGVLR	1	1	1	F4JLM5	N-Term(iTRAQ8plex)	0.870584	0.965825	0.831655	0.987324	1.22519	1.25066	0	2.336e-11
qIEVNFYVHR	2	1	1	Q941A4	N-Term(iTRAQ8plex)	1.26268	1.01957	1.01667	0.865525	1.04033	0.759405	0	3.702e-07
gFTFTGYYP	2	3	2	O82209;Q9M0D5	N-Term(iTRAQ8plex)							0	0.0001274
lMMMGTADEIVk	5	3	1	Q949Y0	N-Term(iTRAQ8plex); K12(iTRAQ8plex)	0.961135	0.876177	0.975583	1.0645	1.13007	1.0989	0	2.068e-08
yIFTIDDDcFVAk	10	2	2	Q9SRT9;Q9LFW1	N-Term(iTRAQ8plex); C9(Carbamidomethyl); K13(iTRAQ8plex)							0	5.659e-10
iAVLVGTITDDLR	2	2	2	Q940B0;P42791	N-Term(iTRAQ8plex)							0	5.274e-08
gWSASTTGTIDGk	4	1	1	O49326	N-Term(iTRAQ8plex); K13(iTRAQ8plex)	1.01914	1.04868	0.957143	0.955076	1.1391	0.888629	0	1.149e-07
fEGITMAPPDPILGVSEAFk	3	3	1	F4JTH0	N-Term(iTRAQ8plex); K20(iTRAQ8plex)	1.10144	1.10679	1.24712	1.05274	0.875666	0.83905	0	2.316e-08
aAPVWYNMLk	9	3	1	O65390	N-Term(iTRAQ8plex); K10(iTRAQ8plex)	1.07331	1.13238	1.22263	0.902263	0.857594	0.742005	0	1.25e-06
tQEEEQPLTWPSGNNAFSGFDPNIIAEAFk	8	1	1	Q9ZWA9	N-Term(iTRAQ8plex); K30(iTRAQ8plex)	1.11885	1.03489	1.15905	0.844398	1.04012	0.759584	0	1.947e-10
LyPNQDPTMNQFFANSLk	7	2	1	Q96520	Y2(iTRAQ8plex); K18(iTRAQ8plex)	0.911142	1.15784	1.07252	0.782236	1.11693	0.881706	0	2.333e-06
fDGILGLGFk	5	2	1	F4JGD2	N-Term(iTRAQ8plex); K10(iTRAQ8plex)	1.07683	0.996599	1.0526	0.981738	0.89311	0.970922	0	1.931e-09
vGSGPFPTENLGTGGDLLR	3	3	1	Q8LEZ6	N-Term(iTRAQ8plex)	1.10389	1.08209	1.08262	0.868031	0.857712	0.911312	0	1.705e-09
mGQMSVLTGTQGEIR	2	2	1	Q96520	N-Term(iTRAQ8plex)	0.935918	0.991867	0.936939	1.06245	0.913828	1.23201	0	6.516e-10
eQMSYTIDALk	2	2	1	Q9ZU25	N-Term(iTRAQ8plex); K11(iTRAQ8plex)	0.894261	1.2041	0.896925	0.987362	1.13779	0.924319	0	1.397e-10
iLTGLTDSQLENLDMIEGSEYVR	1	1	1	Q9MBH2	N-Term(iTRAQ8plex)	0.99146	0.936045	0.994145	0.960448	1.01003	1.17246	0	2.853e-11
aLALGASGIFIGR	2	8	1	Q2V3V9	N-Term(iTRAQ8plex)	1.00837	0.846939	0.806202	1.17116	1.11941	1.14009	0	2.246e-09
lVYQLFTDDLTSR	6	1	1	F4JVN6	N-Term(iTRAQ8plex)	1.20879	1.16301	1.19027	0.83899	0.722149	0.827198	0	4.123e-08
vNYPIIADPNk	13	1	1	O04005	N-Term(iTRAQ8plex); K11(iTRAQ8plex)	0.662733	0.900992	0.662472	1.28578	1.57913	1.25122	0	6.455e-06
lDTGNYSWGSEATTR	2	1	1	Q93VG5	N-Term(iTRAQ8plex)	0.949864	1.13803	1.02135	1.03277	0.871035	1.03301	0	4.289e-13
sSGEDTIILAGAEYGSGSSR	2	2	1	Q9SIB9	N-Term(iTRAQ8plex)	1.07964	0.939972	1.00279	0.964081	1.04099	0.967595	0	8.633e-11
dAGVISGLNVMR	3	1	1	Q9LHA8	N-Term(iTRAQ8plex)	1.0164	1.08445	1.16111	0.851192	0.866997	0.816313	0	5.466e-05
eMVQQILEAAEQYk	4	2	1	Q8L8Y7	N-Term(iTRAQ8plex); K14(iTRAQ8plex)	1.05816	0.971454	1.05603	1.03424	0.94884	1.02877	0	3.62e-07
sAFAVPEDILR	4	1	1	F4IQK5	N-Term(iTRAQ8plex)	1.12619	1.16018	1.17294	0.774379	0.908479	0.796423	0	2.211e-05
iPHFNAPIYLENk	4	1	1	Q8VZT0	N-Term(iTRAQ8plex); K13(iTRAQ8plex)	0.689503	0.713238	0.634751	1.35777	1.42298	1.42428	0	4.231e-10
tPVYTIASNAGVEGAVIVGk	2	1	1	P29197	N-Term(iTRAQ8plex); K20(iTRAQ8plex)	0.847637	0.907865	0.845349	1.10393	1.26787	1.18632	0	5.319e-09
fMPVNLELIFSk	11	1	1	O81270	N-Term(iTRAQ8plex); K12(iTRAQ8plex)	1.16364	1.26563	1.16294	0.832147	0.831906	0.678284	0	9.867e-08
gGGSVIAFVk	2	5	1	O65398	N-Term(iTRAQ8plex); K10(iTRAQ8plex)	1.16304	1.20629	1.19876	0.64972	1.00139	0.689011	0	6.541e-08
rMPGMPGVDNDNWEVPR	1	1	1	Q93ZT6	N-Term(iTRAQ8plex)	0.882394	0.96286	0.978802	1.00996	0.930063	1.32787	0	8.335e-11
eAVILEcHScAEGEIEk	6	1	1	F4JQG6	N-Term(iTRAQ8plex); C7(Carbamidomethyl); C10(Carbamidomethyl); K17(iTRAQ8plex)	1.29133	1.17078	1.2953	0.674208	0.693066	0.66761	0	5.756e-12
iPLGVFGSPMEMVLQQAk	2	2	1	Q93VH5	N-Term(iTRAQ8plex); K18(iTRAQ8plex)	1.04509	1.24249	0.893233	0.873989	1.0805	0.872031	0	2.069e-09
nTALLVIDMQNDFIEEGAVTQVk	1	1	1	Q93Z51	N-Term(iTRAQ8plex); K23(iTRAQ8plex)	1.05749	1.06413	0.975752	1.0148	0.990486	0.93935	0	7.314e-11
gQEAASMTAk	16	3	1	Q9SIN3	N-Term(iTRAQ8plex); K10(iTRAQ8plex)	0.866784	0.899538	0.910378	1.06476	1.31665	1.02907	0	7.076e-10
iISYASGEQSLPLFS	1	4	1	Q9LRM9	N-Term(iTRAQ8plex)	1.12194	0.800378	0.998389	1.09136	1.02527	1.02955	0	7.959e-07
gHAVLVVAEGAGQEMIPR	2	1	1	Q9FIK0	N-Term(iTRAQ8plex)	0.963421	0.839611	1.02252	0.963042	1.09743	1.19601	0	1.958e-11
dLSLQEAETIAVSILk	1	1	1	O81149	N-Term(iTRAQ8plex); K16(iTRAQ8plex)	1.14936	1.16821	1.15957	0.806654	0.934848	0.729985	0	1.855e-10
aLADELGIPFLETSAk	1	1	1	Q9ZRE2	N-Term(iTRAQ8plex); K16(iTRAQ8plex)	0.91862	0.932137	0.901471	1.11737	1.07939	1.17272	0	2.641e-09
nVLcQFWGMDFTTDk	3	1	1	Q9CAV0	N-Term(iTRAQ8plex); C4(Carbamidomethyl); K15(iTRAQ8plex)	0.971704	1.21229	1.11241	0.950335	0.871948	0.916827	0	6.265e-10
dVMDMVLVTQYFDTLk	2	1	1	Q9CAR7	N-Term(iTRAQ8plex); K16(iTRAQ8plex)	0.97116	0.94479	1.05733	0.917099	1.24191	0.91978	0	1.625e-09
wTVQQAAELSVAAPTIAASLDcR	3	2	2	Q9SH69;Q9FFR3	N-Term(iTRAQ8plex); C22(Carbamidomethyl)							0	9.023e-12
vDNFGTVNLVDAcR	1	1	1	Q8H124	N-Term(iTRAQ8plex); C13(Carbamidomethyl)	0.925749	1.03047	0.991001	1.03528	0.966068	1.12846	0	5.556e-11
lYPAGATTNSQDGVTDLFGk	1	1	1	O04904	N-Term(iTRAQ8plex); K20(iTRAQ8plex)	0.758114	0.830326	0.82662	1.25746	1.36334	1.18401	0	1.831e-09
sQVFSTAADNQTQVGIR	2	1	1	Q9LDZ0	N-Term(iTRAQ8plex)	0.948769	0.855058	0.971613	0.921579	0.915761	1.41854	0	1.679e-10
sALAILMNLGMIDESk	1	1	1	O80585	N-Term(iTRAQ8plex); K16(iTRAQ8plex)	1.009	1.15397	1.09063	1.18014	0.860466	0.745811	0	8.113e-08
lAHLFEVGEDSEYSVMAk	2	3	1	P94078	N-Term(iTRAQ8plex); K18(iTRAQ8plex)	1.0335	0.948613	1.01398	1.04113	1.07544	0.949819	0	7.49e-11
aLIEFcDGAPPVk	1	3	1	Q8LAH5	N-Term(iTRAQ8plex); C6(Carbamidomethyl); K13(iTRAQ8plex)	1.08399	0.924414	0.961283	1.01077	0.994933	1.07884	0	7.044e-07
nFYANFQVDEIGR	4	4	1	P92549	N-Term(iTRAQ8plex)	0.917589	0.906385	0.960265	1.0558	0.770995	1.37411	0	9.94e-11
eHVSSAPSTTTTTTTR	1	2	1	Q96270	N-Term(iTRAQ8plex)	0.646552	0.839814	0.749424	1.01372	1.59065	1.39845	0	2.403e-11
fSASYEMPGFLMSEMk	4	1	1	O23254	N-Term(iTRAQ8plex); K16(iTRAQ8plex)	1.02761	1.12652	1.08609	0.895049	0.987817	0.878771	0	6.411e-09
sIWISYWSQADk	10	4	2	Q96528;P25819	N-Term(iTRAQ8plex); K12(iTRAQ8plex)							0	6.656e-09
eLPEQIDTSTYMPS	1	5	1	Q9LFN6	N-Term(iTRAQ8plex)	0.927902	0.913416	0.987731	1.08407	1.11297	1.08028	0	8.429e-05
aQEMFGHLLFGADTNVIQPMNIR	3	1	1	Q8W4H8	N-Term(iTRAQ8plex)	0.794817	0.675686	0.794023	1.28019	1.11401	1.36493	0	1.386e-09
dMMNTPAIQNLMNNPEFMR	1	1	1	Q9SII8	N-Term(iTRAQ8plex)	0.729445	0.834944	0.797464	1.38401	1.19844	1.29327	0	4.491e-09
vQSIVAEIFGk	4	1	1	Q9LDZ0	N-Term(iTRAQ8plex); K11(iTRAQ8plex)	1.13865	1.13289	1.12516	0.919532	0.757383	0.894276	0	1.285e-08
mLVDDIGDVTITNDGATILR	1	1	1	P28769	N-Term(iTRAQ8plex)	1.18556	0.797185	1.00923	0.99783	0.892945	1.14702	0	6.433e-13
aETTPTGGATSSATASGSSSGR	1	1	1	Q6DBQ1	N-Term(iTRAQ8plex)	0.939086	1.04851	1.02844	0.865115	0.875839	1.28093	0	1.79e-09
sLGVIGLGGLGHMAVk	2	1	1	Q9CAI3	N-Term(iTRAQ8plex); K16(iTRAQ8plex)	0.879838	0.982631	0.846779	1.09868	1.15943	1.15404	0	2.442e-13
eVATLDALQSk	3	2	1	A8MS28	N-Term(iTRAQ8plex); K11(iTRAQ8plex)	0.97228	1.0185	1.1476	0.921194	1.03868	0.927566	0	3.296e-10
tFVADGGEcLIAQSYAk	1	2	1	P46645	N-Term(iTRAQ8plex); C9(Carbamidomethyl); K17(iTRAQ8plex)	0.862223	1.00806	1.02911	1.10338	1.10708	0.997157	0	1.725e-09
tSSLGSTTTAYDTGTVHHEk	5	1	1	P25863	N-Term(iTRAQ8plex); K20(iTRAQ8plex)	0.638768	0.649242	0.745866	1.44395	1.38437	1.32298	0	1.138e-11
eQISEWLIPLLEGR	1	1	1	Q8RWZ3	N-Term(iTRAQ8plex)	1.05025	0.926266	0.830199	1.13773	1.16615	0.998444	0	1.848e-09
pQLGYISTLNSYDLPILR	2	2	1	P15455	N-Term(iTRAQ8plex)	1.01607	1.15524	0.983314	0.911442	0.725832	1.18217	0	9.67e-08
iFNVLGEPVDNLGPVDTR	5	2	1	P19366	N-Term(iTRAQ8plex)	1.16117	0.970683	1.04008	0.967183	0.697307	0.870977	0	5.068e-10
sFFTVSGEVDSk	3	2	1	Q9SMX3	N-Term(iTRAQ8plex); K12(iTRAQ8plex)	1.09289	1.15248	1.12207	0.87026	0.936494	0.866599	0	1.765e-11
hILVFGGEIAMDPk	4	1	1	O49326	N-Term(iTRAQ8plex); K14(iTRAQ8plex)	0.857289	0.968826	0.9299	1.0754	1.13975	1.0906	0	1.792e-10
sISAQNPDISGDR	1	1	1	P28769	N-Term(Acetyl)							0	3.095e-05
yWPWEDGTNSVSMAk	10	4	1	Q9FKK7	N-Term(iTRAQ8plex); K15(iTRAQ8plex)	0.922323	1.05963	0.977179	1.01673	1.01702	0.9509	0	2.031e-08
yNITLLPGDGIGPEVISVAk	6	2	1	Q8LB97	N-Term(iTRAQ8plex); K20(iTRAQ8plex)	0.9759	0.963295	0.862554	1.02467	1.18629	1.052	0	1.305e-06
aSVANVAPWVMTVGAGTLDR	1	1	1	Q9ZUF6	N-Term(iTRAQ8plex)	1.26346	0.993121	1.0278	0.91284	0.895254	0.880909	0	3.734e-10
aAGVSIESYWPMLFAk	8	2	1	Q8LCW9	N-Term(iTRAQ8plex); K16(iTRAQ8plex)	1.03385	1.00558	1.00937	0.888027	0.964335	1.02215	0	4.016e-10
dPILGVTEAFLADPSPEk	2	1	1	P46643	N-Term(iTRAQ8plex); K18(iTRAQ8plex)	0.910919	0.939504	0.871595	1.10952	1.13401	1.15935	0	8.497e-12
gVMDQTVGEGTHFLIPILQR	1	1	1	O04331	N-Term(iTRAQ8plex)	0.881061	1.03388	0.969513	1.07	1.18502	0.969034	0	1.829e-11
nSMADYWVHHGk	6	1	1	Q941A4	N-Term(iTRAQ8plex); K12(iTRAQ8plex)	1.13229	1.2905	1.03398	0.778221	0.863836	0.787768	0	1.665e-11
iPSAVGYQPTLASDLGALQER	4	4	1	P83483	N-Term(iTRAQ8plex)	1.00585	0.970874	1.0232	1.00282	1.00293	1.09971	0	3.391e-08
dGVAIGAFAAMER	1	1	1	O65351	N-Term(iTRAQ8plex)	1.0746	1.00723	1.18355	0.945987	0.901057	0.886618	0	3.255e-11
gLYLPSFFNTAk	145	1	1	P15455	N-Term(iTRAQ8plex); K12(iTRAQ8plex)	0.991158	1.04088	0.999714	0.941592	1.14945	0.913062	0	1.957e-05
lAALEASGSTNYVLVTSPAVGk	3	4	1	Q93W03	N-Term(iTRAQ8plex); K22(iTRAQ8plex)	0.893511	0.88045	0.974852	1.2072	1.08186	1.07506	0	8.894e-10
lTQMNSDLFGGVDAIVk	1	1	1	Q94A40	N-Term(iTRAQ8plex); K17(iTRAQ8plex)	0.972833	0.91291	1.05702	1.3038	0.859836	0.992784	0	2.117e-11
sSVFGSSAEDGLLNIWDYDR	2	1	1	O22607	N-Term(iTRAQ8plex)	0.874295	0.904255	1.17452	0.81905	0.966684	1.2498	0	4.708e-12
iYQGQTVSPITFQTk	4	2	1	O64530	N-Term(iTRAQ8plex); K15(iTRAQ8plex)	1.0292	1.21177	1.03054	0.922461	0.887049	0.887217	0	6.114e-09
fLADLASAIDEEDIAk	2	3	1	Q9SPE6	N-Term(iTRAQ8plex); K16(iTRAQ8plex)	1.15443	0.983555	1.05111	0.973859	0.960991	0.865703	0	1.209e-08
gGFTYSAcVDDHSk	2	1	1	P93026	N-Term(iTRAQ8plex); C8(Carbamidomethyl); K14(iTRAQ8plex)	0.843445	0.846171	0.847521	1.17495	1.30089	1.1625	0	4.205e-12
gAELVLFPEGFIGGYPR	4	2	1	P32961	N-Term(iTRAQ8plex)	1.05899	0.984153	1.00672	0.9739	1.20036	0.860533	0	2.498e-11
lSIFAGGDETTVk	2	1	1	Q9SZE1	N-Term(iTRAQ8plex); K13(iTRAQ8plex)	1.06601	1.0292	1.08791	0.947103	0.891965	0.989885	0	3.322e-07
fYVLGETIFHAVk	1	1	1	O80568	N-Term(iTRAQ8plex); K13(iTRAQ8plex)	0.924295	1.25184	0.968433	0.921515	1.11272	0.869071	0	1.312e-08
dSINVEQAFLTIAGEIk	2	1	1	Q9ZRE2	N-Term(iTRAQ8plex); K17(iTRAQ8plex)	1.35924	1.1177	0.958021	0.756904	0.858274	0.800453	0	1.26e-09
lAQITVPVNNPGNyK	34	1	1	Q9LUJ7	N-Term(iTRAQ8plex); Y14(iTRAQ8plex)	0.702231	0.809947	0.709758	1.34572	1.49225	1.28599	0	7.158e-12
sDETVAMIEAYLR	2	1	1	Q9SIB9	N-Term(iTRAQ8plex)	0.923223	0.999321	1.2157	0.762063	1.18444	0.836606	0	1.295e-08
lVVPNSScGGIIGk	1	1	1	Q9LZ82	N-Term(iTRAQ8plex); C8(Carbamidomethyl); K14(iTRAQ8plex)	1.05228	1.0644	1.15012	0.818424	0.940193	0.962546	0	7.145e-06
aDSDEVTAPPAAAIAGSQPVGVNIAELVLVR	1	3	1	Q8VZG7	N-Term(iTRAQ8plex)	0.440779	0.545997	0.582587	1.63141	1.64475	1.58881	0	1.88e-13
dAAAIQAAETR	1	1	1	Q9SA57	N-Term(iTRAQ8plex)	0.940953	0.956468	0.991832	1.09228	1.14276	0.97602	0	2.186e-08
dLFHVLEHEFHPLDLGSk	2	2	1	Q9LD55	N-Term(iTRAQ8plex); K18(iTRAQ8plex)	0.977064	1.0474	1.0598	0.948103	1.11195	0.904676	0	1.446e-12
sGPEAFAFDSTGk	3	1	1	P94111	N-Term(iTRAQ8plex); K13(iTRAQ8plex)	0.970219	1.00034	1.00887	1.04991	1.07126	1.03682	0	1.304e-06
iWAFGPETTGPNMVVDMck	7	1	1	Q9ASR1	N-Term(iTRAQ8plex); C18(Carbamidomethyl); K19(iTRAQ8plex)	1.06553	1.28792	1.10527	0.864755	0.873849	0.751298	0	2.216e-07
vGTNVEEAFQcIAk	4	1	1	Q9LS94	N-Term(iTRAQ8plex); C11(Carbamidomethyl); K14(iTRAQ8plex)	1.11185	1.06626	1.16208	0.930803	0.792377	0.888362	0	1.289e-08
fIMDEVYDMELYEWTk	1	6	2	O04487;Q9FVT2	N-Term(iTRAQ8plex); K16(iTRAQ8plex)							0	4.478e-09
kDWGVPGDLFGALPGR	9	2	1	Q9LU86	N-Term(iTRAQ8plex); K1(iTRAQ8plex)	0.617808	0.642173	0.695187	1.39207	1.69883	1.35385	0	3.029e-09
qGGGVVITGVDGGGNAAk	1	2	1	A8MSF2	N-Term(iTRAQ8plex); K18(iTRAQ8plex)	0.845511	0.936485	0.811415	1.09591	1.20253	1.26512	0	4.906e-12
tSTPGIFAIGDVAAFPLk	3	4	1	F4I576	N-Term(iTRAQ8plex); K18(iTRAQ8plex)	1.06848	1.19058	1.16836	0.818034	0.790223	0.78468	0	2.437e-05
nGPDGWVPESIEIYSEGSk	25	4	1	B9DGU8	N-Term(iTRAQ8plex); K19(iTRAQ8plex)	0.79559	0.707311	0.79903	1.33848	1.27987	1.33938	0	6.109e-06
sVTANDFSYSGLNIAR	1	1	1	Q9M8X6	N-Term(iTRAQ8plex)	0.754757	0.80541	0.688713	1.29038	1.31669	1.38993	0	3.724e-10
gFDVFNALDVMHNESFLk	1	1	1	Q9LTR9	N-Term(iTRAQ8plex); K18(iTRAQ8plex)	0.912169	1.01035	0.913837	1.12355	1.22026	0.941181	0	2.729e-10
gPGTSLEFALAIVEk	1	2	1	Q9MAH3	N-Term(iTRAQ8plex); K15(iTRAQ8plex)	1.08768	1.10922	1.19144	0.840374	0.942478	0.79967	0	6.836e-08
eVLSDILLGMAAGLk	1	1	1	Q9T0I9	N-Term(iTRAQ8plex); K15(iTRAQ8plex)	1.02683	1.25306	1.03004	0.873193	0.930917	0.882185	0	4.233e-09
lFVTNDAATIVNELEIQHPAAk	1	1	1	Q94K05	N-Term(iTRAQ8plex); K22(iTRAQ8plex)	1.19547	1.07529	0.960929	0.962356	0.925315	0.879105	0	8.17e-08
eLISNSSDALDk	3	6	3	P55737;P51818;P27323	N-Term(iTRAQ8plex); K12(iTRAQ8plex)							0	4.814e-11
kTITLEVESSDTIDNVk	3	2	1	A6XI99	N-Term(iTRAQ8plex); K1(iTRAQ8plex); K17(iTRAQ8plex)	0.955095	0.841512	1.0034	1.12096	1.11703	1.04505	0	1.547e-10
aPQAAGAIHTDFER	1	1	1	Q9SA73	N-Term(iTRAQ8plex)	1.00731	1.00481	1.0438	1.13107	0.941406	0.935263	0	3.051e-08
vcLLGcGVPTGLGAVWNTAk	2	2	1	Q96533	N-Term(iTRAQ8plex); C2(Carbamidomethyl); C6(Carbamidomethyl); K20(iTRAQ8plex)	0.923217	0.826999	0.957895	1.02197	1.28199	1.10636	0	3.105e-09
qNAMVLPQWNANANAILYVTDGEAQIQIVNDNGNR	13	2	1	P15455	N-Term(iTRAQ8plex)	1.07542	0.920356	1.05889	0.991289	0.806043	1.10289	0	2.677e-09
fDMGGSAAVLGAAk	2	4	2	Q944P7;P30184	N-Term(iTRAQ8plex); K14(iTRAQ8plex)							0	1.905e-11
nPNLASLVVDPDFAk	2	1	1	Q9FFR3	N-Term(iTRAQ8plex); K15(iTRAQ8plex)	1.03717	1.05016	1.00497	1.05176	0.901902	0.989337	0	3.711e-08
vVDGNSVGVEGVk	1	2	1	Q9LZQ4	N-Term(iTRAQ8plex); K13(iTRAQ8plex)	0.934929	1.03476	1.09343	0.942786	0.948481	1.09118	0	7.903e-08
iLMVGLDAAGk	5	6	1	P36397	N-Term(iTRAQ8plex); K11(iTRAQ8plex)	0.870697	1.22207	0.942829	0.972476	1.04571	0.989075	0	1.268e-08
dIQAWEYVPLGPFLGk	1	2	1	Q8RW90	N-Term(iTRAQ8plex); K16(iTRAQ8plex)	1.04783	1.00868	1.01312	0.990632	1.10257	0.886121	0	3.802e-09
qGPGEQAAGSASEAk	4	1	1	Q9ZUX4	N-Term(iTRAQ8plex); K15(iTRAQ8plex)	0.834357	0.854713	0.824425	1.14456	1.21272	1.09559	0	3.366e-08
aDVYkPQLGYISTLNSYDLPILR	117	2	1	P15455	N-Term(iTRAQ8plex); K5(iTRAQ8plex)	1.0872	1.09527	1.09306	0.874744	1.0596	0.804088	0	1.779e-12
dVMDMVLVTQYFDTMk	1	1	1	Q9FM19	N-Term(iTRAQ8plex); K16(iTRAQ8plex)	0.994443	0.931661	0.927921	1.02223	1.21243	1.00604	0	8.057e-11
eALSDLLGYYYPLSGSLk	1	1	1	O80467	N-Term(iTRAQ8plex); K18(iTRAQ8plex)	1.16297	1.10463	1.00771	1.05159	0.855319	0.821285	0	2.168e-10
aVLNAIDYLFk	5	7	1	B9DFI3	N-Term(iTRAQ8plex); K11(iTRAQ8plex)	0.942121	1.22293	1.12468	0.892338	1.02291	0.794842	0	6.031e-07
lSTMTADEYFEk	3	1	1	Q9FT52	N-Term(iTRAQ8plex); K12(iTRAQ8plex)	0.655777	0.782129	0.74002	1.33108	1.40413	1.31997	0	3.663e-08
aISGGDMVNLNLDWR	4	2	2	Q56ZQ3;O80977	N-Term(iTRAQ8plex)							0	1.837e-09
aHGLAPEIPEDLYHLIk	8	2	2	P59224;P59223	N-Term(iTRAQ8plex); K17(iTRAQ8plex)							0	5.118e-11
iEDNNTLVFIVDIR	2	3	1	A8MS83	N-Term(iTRAQ8plex)	0.89149	0.960649	0.945141	1.03354	1.20314	1.04672	0	3.393e-08
yTIQLGENELVLk	6	3	1	Q2HIK4	Y1(iTRAQ8plex); K13(iTRAQ8plex)	0.679599	0.727978	0.867083	1.35252	1.49555	1.06095	0	1.416e-09
aAVEAQLk	8	1	1	Q9M2D8	N-Term(iTRAQ8plex); K8(iTRAQ8plex)	0.751888	0.855078	0.822936	1.2409	1.35735	1.14706	0	2.521e-06
gAHEGQGLGNNFLSHIR	2	1	1	Q9SA73	N-Term(iTRAQ8plex)	0.908457	0.93642	0.902483	1.02717	1.0877	1.23757	0	1.975e-09
lDAQDPTINPEFFQILR	2	1	1	O49293	N-Term(iTRAQ8plex)	1.05536	0.83598	0.899069	0.994443	1.18993	1.07781	0	7.835e-11
gGGGGGGWR	1	1	1	Q9FJS3	N-Term(iTRAQ8plex)	0.590499	0.63765	0.632294	1.36267	1.43178	1.67602	0	1.865e-06
gIYSLNNYLQIk	1	1	1	Q9SU63	N-Term(iTRAQ8plex); K12(iTRAQ8plex)	0.842868	1.12907	0.947633	1.01972	1.19106	0.97294	0	2.813e-07
cVDSVNQILGTFNQGLk	1	1	1	Q9FVV1	N-Term(iTRAQ8plex); C1(Carbamidomethyl); K17(iTRAQ8plex)	0.965091	0.927383	0.975836	1.13732	0.944637	1.14414	0	1.332e-09
eVVPGMIVTGMEVAEIDGAPR	1	1	1	Q38814	N-Term(iTRAQ8plex)	1.0742	0.741891	1.12066	0.796451	0.772519	1.50699	0	6.294e-11
aDVIAAANTAADVALR	2	1	1	Q96327	N-Term(iTRAQ8plex)	1.46097	1.07979	0.923402	0.633853	0.66118	0.816138	0	5.572e-10
vPIEITMGELk	3	2	1	Q93ZN2	N-Term(iTRAQ8plex); K11(iTRAQ8plex)	1.13359	1.12981	1.12044	0.860992	0.957307	0.772751	0	7.601e-05
lDHLVNNAGmTQISmFENIEDITR	1	1	1	P0DKC6	N-Term(iTRAQ8plex); M10(Oxidation); M15(Oxidation)	0.808845	0.863744	0.63357	1.6603	1.19335	1.11605	0	7.52e-13
sNSLFPYELLEVVHAk	11	1	1	Q8H0X6	N-Term(iTRAQ8plex); K16(iTRAQ8plex)	0.843723	0.928243	0.869369	1.17292	1.25002	1.07936	0	6.139e-09
vSVFDSVVQGGDSVWEGLR	1	3	1	Q8W0Z7	N-Term(iTRAQ8plex)	1.01434	1.07939	0.904278	0.924336	1.13644	0.999302	0	3.145e-12
iEAAFVLGQLESk	1	2	1	Q94K48	N-Term(iTRAQ8plex); K13(iTRAQ8plex)	1.05884	0.848271	0.888049	1.04991	1.21366	1.04009	0	4.728e-09
fTGITAELAVPDSTR	1	2	1	Q93ZG7	N-Term(iTRAQ8plex)	1.10466	1.07303	1.04848	0.963854	0.765719	1.04253	0	3.989e-10
lPYTLLSDEGNk	5	2	1	Q9LU86	N-Term(iTRAQ8plex); K12(iTRAQ8plex)	0.606499	0.666856	0.60445	1.38056	1.76344	1.31311	0	4.197e-08
sVVEEcGEDISk	1	1	1	P20115	N-Term(iTRAQ8plex); C6(Carbamidomethyl); K12(iTRAQ8plex)	1.15124	1.1163	1.0321	0.9372	0.807373	0.938976	0	1.685e-07
gQLIESGITSADILk	1	1	1	Q93ZT6	N-Term(iTRAQ8plex); K15(iTRAQ8plex)	1.03392	0.958292	0.87146	0.985318	1.18555	1.04932	0	1.69e-09
tVQGLIEELQk	3	1	1	P21238	N-Term(iTRAQ8plex); K11(iTRAQ8plex)	1.0394	1.22797	1.12289	0.909636	0.897189	0.768351	0	4.613e-07
vSIEAASTFGWGk	3	2	1	F4JBY2	N-Term(iTRAQ8plex); K13(iTRAQ8plex)	0.968135	1.09336	1.02019	0.911874	1.09494	0.892785	0	4.33e-11
dLYINQAVQMDISGNR	3	1	1	Q9M885	N-Term(iTRAQ8plex)	0.852204	1.07043	0.874719	1.1289	1.02979	1.14472	0	4.515e-09
gDLQALAQGYIDSFAPk	1	1	1	Q39085	N-Term(iTRAQ8plex); K17(iTRAQ8plex)	1.11003	1.08115	1.0084	0.869807	1.10757	0.833112	0	6.742e-08
fIGTAGAASTMMNPk	2	3	2	F4HQD4;Q9S7C0	N-Term(iTRAQ8plex); K15(iTRAQ8plex)							0	6.448e-10
yFNIAENEGEEED	2	1	1	Q9M9W1	N-Term(iTRAQ8plex)	0.998234	0.92653	0.944596	1.19905	0.948335	1.08283	0	2.292e-07
dTVGFLEISk	4	1	1	Q93W30	N-Term(iTRAQ8plex); K10(iTRAQ8plex)	1.00938	0.694342	0.6432	1.31744	1.43082	1.18355	0	6.075e-09
dNVSLAGYGVELALk	1	2	1	Q0WL80	N-Term(iTRAQ8plex); K15(iTRAQ8plex)	1.07545	1.06896	1.06377	1.0241	0.878691	0.907432	0	5.75e-08
scALINQk	5	4	1	P49209	N-Term(iTRAQ8plex); C2(Carbamidomethyl); K8(iTRAQ8plex)	1.06439	1.29404	1.13491	0.874631	0.811626	0.763754	0	1.382e-06
iQGFVVSDFYDk	2	3	2	Q39172;Q8LDI4	N-Term(iTRAQ8plex); K12(iTRAQ8plex)							0	8.862e-10
yTPANLELMFSk	12	1	1	Q9FLN9	N-Term(iTRAQ8plex); K12(iTRAQ8plex)	1.00195	1.14222	1.0949	0.904894	0.963711	0.856161	0	9.176e-09
iAGNFGTYESAVLGVANAEk	2	1	1	Q8LGI2	N-Term(iTRAQ8plex); K20(iTRAQ8plex)	0.956116	1.00829	1.08707	0.900386	0.808739	1.23938	0	9.196e-13
aAPYDVYDQLDFDVPVGTR	2	2	1	B5TM95	N-Term(iTRAQ8plex)	1.0134	0.995075	0.901015	1.02529	1.08542	1.03483	0	7.792e-05
aGDVLVFNYNPR	7	1	1	Q8LG89	N-Term(iTRAQ8plex)	0.743404	0.694902	0.783708	1.26638	1.37738	1.469	0	3.023e-10
gNYLEFYNAIk	2	1	1	Q8VZR2	N-Term(iTRAQ8plex); K11(iTRAQ8plex)	0.883588	0.987972	0.954067	1.01026	1.01544	1.22817	0	9.111e-08
aIGVDILTGFGSVLGPQk	2	1	1	A8MS68	N-Term(iTRAQ8plex); K18(iTRAQ8plex)	1.26277	1.44911	1.27862	0.603025	0.674886	0.551752	0	1.193e-11
qFGFIVLTTSAGIMDHEEAR	1	1	1	Q9LX88	N-Term(iTRAQ8plex)	0.963459	0.87259	1.10016	0.913057	1.06028	1.15032	0	4.783e-13
lDATANDFPk	6	2	1	Q9XI01	N-Term(iTRAQ8plex); K10(iTRAQ8plex)	1.01401	1.20385	1.03344	0.909432	0.972671	0.843859	0	2.872e-06
tASWAGWVSDk	5	2	1	Q6NKU0	N-Term(iTRAQ8plex); K11(iTRAQ8plex)	0.758361	0.843621	0.88546	1.21852	1.23733	1.24806	0	7.907e-11
aVELAGcDWIHVDVMDGR	1	1	1	Q9SAU2	N-Term(iTRAQ8plex); C7(Carbamidomethyl)	1.08262	1.18531	1.16413	0.858102	0.762551	0.905875	0	6.852e-13
gQALQFNYLYEk	2	1	1	Q8L831	N-Term(iTRAQ8plex); K12(iTRAQ8plex)	1.05868	1.06887	0.913016	0.954063	1.11944	0.932777	0	1.195e-07
dLILSADTAASDLIR	5	1	1	Q944K2	N-Term(iTRAQ8plex)	1.06945	1.00194	1.03691	0.950379	0.964792	0.875346	0	4.281e-08
sINTLFLTEMVR	2	1	1	Q42599	N-Term(iTRAQ8plex)	1.06018	0.914442	0.895058	1.15381	0.963063	1.08807	0	3.152e-07
tLATcGVPYPTc	6	1	1	Q9FF39	N-Term(iTRAQ8plex); C5(Carbamidomethyl); C12(Carbamidomethyl)	1.15152	0.894313	1.06866	0.940338	0.859383	0.990964	0	1.695e-06
mDPQLTEVSQQFER	1	1	1	Q9SGW3	N-Term(Acetyl)							0	4.306e-08
yVGHSAFDDAYIY	18	1	1	Q9SYX7	N-Term(iTRAQ8plex)	0.801261	0.899091	0.800404	1.08613	1.24227	1.1882	0	1.911e-06
vSQWNLDFTQHSEQGDR	1	4	1	Q00218	N-Term(iTRAQ8plex)	1.02479	1.04518	0.97073	1.01497	0.914264	1.07847	0	1.569e-11
eAEANMDMHMAk	6	1	1	Q39138	N-Term(iTRAQ8plex); K12(iTRAQ8plex)	0.621705	0.589533	0.631538	1.52235	1.62015	1.40699	0	4.135e-12
kEQLGHEGYQEMGHk	25	1	1	Q07187	N-Term(iTRAQ8plex); K1(iTRAQ8plex); K15(iTRAQ8plex)	0.600331	0.629082	0.716035	1.39193	1.69168	1.24964	0	4.918e-13
eLEVIHSR	2	14	2	Q9S7J7;Q9C8S5	N-Term(iTRAQ8plex)							0	2.874e-05
vcENIPIVLcGNk	2	4	1	P41916	N-Term(iTRAQ8plex); C2(Carbamidomethyl); C10(Carbamidomethyl); K13(iTRAQ8plex)	1.13574	1.10343	1.21769	0.812174	0.846889	0.726382	0	9.618e-11
lVDEQIMNVGFISMAR	3	1	1	P46421	N-Term(iTRAQ8plex)	1.14983	1.01531	1.1881	0.786798	0.916547	0.932312	0	1.139e-09
aYLPVVESFGFSSQLR	7	1	1	Q9ASR1	N-Term(iTRAQ8plex)	1.04446	1.1428	1.01468	0.887039	1.0282	0.860186	0	7.394e-09
lSGGVAVIQVGAQTETELk	2	3	2	P21240;C0Z361	N-Term(iTRAQ8plex); K19(iTRAQ8plex)							0	1.674e-09
lPFDAGFEGVGLIAAVGESVk	2	3	1	Q9FX95	N-Term(iTRAQ8plex); K21(iTRAQ8plex)	1.06826	0.967762	0.931414	1.1437	1.22162	0.733481	0	1.036e-09
aDIVGLWALk	6	1	1	Q8L831	N-Term(iTRAQ8plex); K10(iTRAQ8plex)	0.9697	1.15963	0.956258	0.944791	1.01573	0.929654	0	2.178e-08
qGEATLGVIck	5	1	1	Q9SK09	N-Term(iTRAQ8plex); C10(Carbamidomethyl); K11(iTRAQ8plex)	1.11677	1.2134	1.23247	0.742403	0.778511	0.733523	0	2.411e-10
nIGIAMDFSESSk	4	2	1	Q9M328	N-Term(iTRAQ8plex); K13(iTRAQ8plex)	1.01576	0.967914	1.15819	0.942944	0.965582	0.942992	0	4.465e-08
eTPSVAGIINPGSEGFQk	3	2	2	Q9C522;Q9FGX1	N-Term(iTRAQ8plex); K18(iTRAQ8plex)							0	7.392e-09
lITPSILSDR	3	7	2	B3H4B6;F4IHJ8	N-Term(iTRAQ8plex)							0	6.414e-05
gGFLFMPGVPEAIQR	10	1	1	Q9ZVY7	N-Term(iTRAQ8plex)	1.1199	1.13056	1.19268	0.840644	0.882415	0.778894	0	9.359e-09
qEEPDcVcPTLk	24	1	1	P15457	N-Term(iTRAQ8plex); C6(Carbamidomethyl); C8(Carbamidomethyl); K12(iTRAQ8plex)	1.08281	0.879006	1.16189	0.881136	0.981037	0.924467	0	3.764e-09
aETFGIPIPEWTk	3	1	1	P93028	N-Term(iTRAQ8plex); K13(iTRAQ8plex)	0.937666	0.965219	0.950649	1.07452	1.0486	1.12153	0	7.917e-08
vQLDSQPEEIDNLER	2	1	1	P42730	N-Term(iTRAQ8plex)	0.982564	1.06753	1.02342	0.996735	1.00473	0.931072	0	5.594e-11
nLPGVELcHVER	4	7	2	P49691;Q8LA93	N-Term(iTRAQ8plex); C8(Carbamidomethyl)							0	2.829e-08
fSTIETTLTHSSPMSYGR	20	1	1	P15456	N-Term(iTRAQ8plex)	0.817181	1.03136	0.714125	0.978446	1.29085	1.09371	0	4.632e-14
dMPLLQDGPPPGGFAPVR	3	3	1	O49313	N-Term(iTRAQ8plex)	0.982143	0.97828	0.942397	1.06088	1.00873	1.07823	0	2.072e-10
lTLEDPVTVEYITR	4	3	2	Q2V3Q0;O24616	N-Term(iTRAQ8plex)							0	5.176e-09
lYISNLDYGVSNEDIk	3	1	1	Q8L719	N-Term(iTRAQ8plex); K16(iTRAQ8plex)	0.888026	0.993515	0.914313	1.07456	1.1049	1.06845	0	9.091e-09
fMDFGSVFLPSAAk	5	3	1	Q8VZG7	N-Term(iTRAQ8plex); K14(iTRAQ8plex)	1.01192	1.14105	1.04855	0.850515	1.05511	0.916217	0	3.872e-09
sIIASENLSSPFDFNR	3	1	1	Q94AZ4	N-Term(iTRAQ8plex)	0.71329	0.65174	0.747126	1.30721	1.28705	1.37486	0	6.005e-11
nLSQQcLNALAk	3	3	2	F4JBY2;F4IW47	N-Term(iTRAQ8plex); C6(Carbamidomethyl); K12(iTRAQ8plex)							0	1.077e-11
lFGVTTLDVVR	4	5	3	Q9ZP06;Q9LKA3;Q9SN86	N-Term(iTRAQ8plex)							0	2.804e-08
fAAGTEAIANk	3	1	1	Q9LD57	N-Term(iTRAQ8plex); K11(iTRAQ8plex)	0.992807	0.939897	0.905659	0.951011	1.09138	1.09314	0	5.506e-10
yGTGAISGYFSNDDVk	10	2	1	F4JGD2	N-Term(iTRAQ8plex); K16(iTRAQ8plex)	0.892444	1.00961	1.02782	1.08951	1.07332	1.00037	0	6.593e-11
eAIDGAYIDSk	1	1	1	P42733	N-Term(iTRAQ8plex); K11(iTRAQ8plex)	1.01656	0.958916	1.19885	0.979873	0.945524	0.924106	0	6.952e-07
mDSDTLSGLLENVAk	3	1	1	Q9SMT7	N-Term(Acetyl); K15(iTRAQ8plex)	0.878852	0.949938	1.03272	1.0267	1.12065	0.96827	0	6.121e-08
yYEIILVDPAHNAVR	11	2	1	O23515	N-Term(iTRAQ8plex)	0.923414	0.875708	0.971722	1.08898	0.943597	1.17694	0	3.502e-10
vVIVEGNYILLEEGSWk	1	2	1	Q9SA67	N-Term(iTRAQ8plex); K17(iTRAQ8plex)	1.16522	0.908007	0.947623	1.01389	1.10803	0.902958	0	1.46e-09
aSQASSVAVVLASSESVSNESk	1	1	1	Q944P7	N-Term(iTRAQ8plex); K22(iTRAQ8plex)	0.773694	0.885752	1.137	0.957371	1.0339	1.31547	0	4.722e-11
akDAAASAQDSLQQTGQQmk	1	1	1	Q9M892	N-Term(iTRAQ8plex); K2(iTRAQ8plex); M19(Oxidation); K20(iTRAQ8plex)	0.745141	0.767823	0.854802	1.27871	1.32795	1.25258	0	2.498e-11
vINIPVGFDYELYNR	3	1	1	O22666	N-Term(iTRAQ8plex)	0.922582	1.11924	0.990088	0.949087	1.11066	1.01925	0	2.467e-10
iEVVEIVSDGSSGNk	3	1	1	Q9ZPV8	N-Term(iTRAQ8plex); K15(iTRAQ8plex)	0.905293	0.884575	0.926379	1.11196	1.06921	1.04406	0	2.64e-09
lLLVDIDLLESk	2	1	1	Q9LP45	N-Term(iTRAQ8plex); K12(iTRAQ8plex)	0.881346	1.18948	1.10425	0.922172	1.03772	0.899191	0	7.974e-08
vFVAGATGQTGk	2	1	1	Q8H124	N-Term(iTRAQ8plex); K12(iTRAQ8plex)	0.954606	0.997409	0.999533	0.969437	1.07525	1.06676	0	1.834e-07
dGLLYNcAFSIcDLGk	2	1	1	Q9FK91	N-Term(iTRAQ8plex); C7(Carbamidomethyl); C12(Carbamidomethyl); K16(iTRAQ8plex)	1.252	1.05575	1.28721	0.78777	0.835038	0.671976	0	8.98e-10
aEGAMYLFPcLHLPQk	2	1	1	F4I7I0	N-Term(iTRAQ8plex); C10(Carbamidomethyl); K16(iTRAQ8plex)	1.05595	1.0116	1.07528	0.986327	1.05814	0.844926	0	1.706e-08
fTYGYEMPVDILAk	2	1	1	O81146	N-Term(iTRAQ8plex); K14(iTRAQ8plex)	1.02833	1.16192	1.01427	0.877889	1.0588	0.873362	0	1.257e-07
fQGQQHQPEQVRk	8	1	1	P15460	N-Term(iTRAQ8plex); K13(iTRAQ8plex)	0.99483	0.364225	1.058	1.24951	1.34531	1.18473	0	6.076e-09
vWLDPNESSDISMANSR	2	2	1	Q9SRX2	N-Term(iTRAQ8plex)	0.827643	0.840761	0.821079	1.10627	1.22709	1.33424	0	8.614e-10
sQVAGWVETYAGGLNFVTVR	1	1	1	Q9LEY1	N-Term(iTRAQ8plex)	1.07184	0.898169	0.711873	0.888982	1.23176	1.29306	0	1.509e-12
hVAEQAVk	8	1	1	Q8H0X6	N-Term(iTRAQ8plex); K8(iTRAQ8plex)	0.879001	0.930359	0.924088	1.12544	1.23294	1.03616	0	5.532e-06
iDVLINNAAEQyESSTIEEIDEPR	1	1	1	Q9FZ42	N-Term(iTRAQ8plex); Y12(iTRAQ8plex)	0.996656	1.12739	1.27922	1.03307	0.540949	1.00187	0	4.867e-13
fDPYGPPGVPGFEPGR	2	1	1	Q9M330	N-Term(iTRAQ8plex)	1.06296	0.950002	1.09853	0.979108	0.886696	1.03128	0	5.089e-08
lELAEVYLTPSk	4	1	1	O81148	N-Term(iTRAQ8plex); K12(iTRAQ8plex)	1.02281	1.10331	1.1075	0.869272	0.914437	0.792279	0	1.47e-07
gSNQLVLDEAER	1	1	1	Q9LV21	N-Term(iTRAQ8plex)	0.911632	1.05963	0.917717	1.06349	1.15932	0.991531	0	3.589e-10
vFDGQVSQGQLIAVPQGFSVVkR	10	2	1	P15455	N-Term(iTRAQ8plex); K22(iTRAQ8plex)	1.13788	0.93269	1.18502	0.935253	0.938302	0.870757	0	5.589e-12
iFGSTGEDISGGk	5	1	1	Q9LXQ2	N-Term(iTRAQ8plex); K13(iTRAQ8plex)	0.962577	1.20233	1.04882	0.983697	0.925859	0.949094	0	1.017e-09
sLLSDLVNLNLTDATGk	1	1	1	Q9LVI8	N-Term(Acetyl); K17(iTRAQ8plex)	1.16619	0.994614	1.26358	0.735712	0.95066	0.830553	0	2.069e-07
gNASVPAMEMTk	2	5	1	O50008	N-Term(iTRAQ8plex); K12(iTRAQ8plex)	1.07135	1.12747	1.13819	0.866563	0.956006	0.820192	0	4.562e-11
tAFWEAEGETAkA	3	1	1	Q94BT9	N-Term(iTRAQ8plex); K12(iTRAQ8plex)	1.04901	0.978961	1.03976	1.04607	0.952283	0.966579	0	2.589e-08
aALLSFFETMR	22	2	1	P0DKC6	N-Term(iTRAQ8plex)	0.948359	1.07242	0.887049	0.983853	1.13362	1.05792	0	6.911e-06
gTDTVVLAVEk	3	3	2	Q2V3Q0;O24616	N-Term(iTRAQ8plex); K11(iTRAQ8plex)							0	1.174e-05
iFNTNNLWVNLk	6	3	2	Q9M9P3;P57751	N-Term(iTRAQ8plex); K12(iTRAQ8plex)							0	2.919e-06
eSLSHSGQEAR	5	3	1	Q9SIN3	N-Term(iTRAQ8plex)	0.73899	0.816917	0.618758	1.25502	1.91246	1.21746	0	3.228e-08
sVDYDYVEENLFGSk	2	1	1	Q9XIF8	N-Term(iTRAQ8plex); K15(iTRAQ8plex)	1.01033	0.999064	1.0812	1.05144	0.934346	0.966457	0	2.131e-07
lEIQAIADDITSk	2	1	1	P56773	N-Term(iTRAQ8plex); K13(iTRAQ8plex)	1.10932	1.09764	1.08612	0.8908	0.91347	0.835101	0	9.28e-09
mATDTSGEAk	5	3	1	Q6NKU0	N-Term(iTRAQ8plex); K10(iTRAQ8plex)	0.652359	0.623361	0.725704	1.36038	1.64645	1.26312	0	2.287e-06
lSYLSGVTIMEAAAR	1	1	1	Q42523	N-Term(iTRAQ8plex)	1.59398	1.30427	0.603892	0.713102	0.602983	1.05676	0	4.539e-09
aFGAELVLTEPAk	4	1	1	P47999	N-Term(iTRAQ8plex); K13(iTRAQ8plex)	0.998653	0.985165	1.09481	0.977685	1.03545	1.05273	0	2.538e-08
iDISGQNSWVGk	1	2	1	Q9SKP6	N-Term(iTRAQ8plex); K12(iTRAQ8plex)	0.968394	1.01818	0.964876	0.98569	1.00852	1.12233	0	1.284e-10
aQQDMGETMGELGLAFIk	1	2	1	Q8L5Z7	N-Term(iTRAQ8plex); K18(iTRAQ8plex)	1.08906	0.94829	1.14485	0.875041	0.935907	1.00788	0	1.027e-08
tVQGGISSTAAMGk	1	1	1	P28297	N-Term(iTRAQ8plex); K14(iTRAQ8plex)	0.884298	1.05484	1.08331	0.956216	1.02119	1.0633	0	8.113e-14
vNLDPEGVFDFSAk	4	4	1	F4JHJ0	N-Term(iTRAQ8plex); K14(iTRAQ8plex)	0.94608	1.02329	0.973934	0.892686	0.947202	1.15888	0	8.592e-09
eTSPQNSVVIIDMNMPMQPLR	1	1	1	Q0WLB5	N-Term(iTRAQ8plex)	0.822398	0.863521	0.737116	1.26642	1.34382	1.18041	0	6.908e-11
aSAIILNTFDSLEHDVVR	1	2	1	W8PVB6	N-Term(iTRAQ8plex)	0.963957	1.07786	0.906595	0.928556	1.07924	1.11107	0	1.049e-11
qAVVNPENTFFSVk	4	2	2	Q9LTX9;Q9STW6	N-Term(iTRAQ8plex); K14(iTRAQ8plex)							0	6.363e-09
dDEYGISTESLk	3	1	1	Q941A4	N-Term(iTRAQ8plex); K12(iTRAQ8plex)	1.11679	1.23117	1.20102	0.757403	0.883896	0.754956	0	2.494e-11
gGLkEENIVVLMYDDIANHPLNPR	3	1	1	Q39044	N-Term(iTRAQ8plex); K4(iTRAQ8plex)	1.09591	1.20283	1.00946	0.963592	1.00255	0.833846	0	5.42e-11
tLQIDGITEQIEHAk	2	1	1	O82762	N-Term(iTRAQ8plex); K15(iTRAQ8plex)	0.70404	0.711624	0.657029	1.37775	1.4213	1.40395	0	8.314e-11
hVVFGQVVk	8	1	1	Q42406	N-Term(iTRAQ8plex); K9(iTRAQ8plex)	0.62418	0.71215	0.710252	1.43101	1.51849	1.28087	0	1.781e-08
eANVDAELGLPSHTDk	1	12	2	Q944X1;Q944X6	N-Term(iTRAQ8plex); K16(iTRAQ8plex)							0	3.213e-11
sALVTTAYDVENSGEPIEDLATGk	3	1	1	Q9LVJ1	N-Term(iTRAQ8plex); K24(iTRAQ8plex)	1.05045	0.993111	0.828087	0.963202	1.06277	1.12275	0	9.984e-12
sFVAEYPIVSIEDPFDQDDWEHYAk	2	3	1	P25696	N-Term(iTRAQ8plex); K25(iTRAQ8plex)	0.994757	1.1993	1.15247	0.826839	0.936216	0.827193	0	3.987e-13
mEFVVEEGk	1	2	1	Q8L9C1	N-Term(Acetyl); K9(iTRAQ8plex)	1.0614	0.902456	0.975378	0.967882	1.0275	1.12187	0	2.528e-05
tMISDSDYTEFDNFTk	3	4	1	Q8LA93	N-Term(iTRAQ8plex); K16(iTRAQ8plex)	1.01312	1.03036	0.909579	0.964753	1.09287	0.977293	0	6.672e-09
lDQDILSPLAGk	1	6	1	F4HXD1	N-Term(iTRAQ8plex); K12(iTRAQ8plex)	0.95357	1.13924	1.07539	0.902831	0.976281	0.980253	0	3.494e-08
sDSLPVNDGLESSFTGMk	2	2	1	F4K6W6	N-Term(iTRAQ8plex); K18(iTRAQ8plex)	0.903606	0.897479	0.964608	1.09655	1.04612	1.20315	0	6.793e-11
vVcDAFGVNLIELLk	1	1	1	Q9FK25	N-Term(iTRAQ8plex); C3(Carbamidomethyl); K15(iTRAQ8plex)	0.960491	0.910004	0.999652	1.04687	1.13981	1.03692	0	5.292e-09
vGLTGLTVAEYFR	8	5	1	P83483	N-Term(iTRAQ8plex)	1.13828	0.996245	1.02604	0.936123	0.867132	0.901442	0	3.427e-10
fSLEETVAILHVR	1	2	1	Q8LCW6	N-Term(iTRAQ8plex)	0.878946	1.00494	1.0773	0.959044	1.07452	1.08017	0	4.334e-10
eYTDVISDVALLASDR	2	4	1	F4JQH3	N-Term(iTRAQ8plex)	1.10977	1.09277	1.13349	1.05597	0.849764	0.757521	0	8.917e-10
vLVLLDDLSLk	2	1	1	Q944K2	N-Term(iTRAQ8plex); K11(iTRAQ8plex)	1.04682	1.1314	1.11663	0.822843	1.0712	0.797453	0	5.539e-07
lQYTSAPDVVVLFEAASR	1	1	1	Q8W4F1	N-Term(iTRAQ8plex)	1.09683	1.035	1.16958	1.07433	0.784805	0.841952	0	1.144e-07
sSYSSSYSNNVDLLVSSk	1	1	1	P56765	N-Term(iTRAQ8plex); K18(iTRAQ8plex)	0.953027	0.866947	0.928642	1.05392	1.20593	1.10781	0	1.43e-08
vEAEGNQSGTPk	2	1	1	Q9SP02	N-Term(iTRAQ8plex); K12(iTRAQ8plex)	0.86789	1.06793	0.986779	1.12005	1.15396	0.899901	0	7.693e-10
tTLVANTSNMPVAAR	2	3	1	O23654	N-Term(iTRAQ8plex)	1.01737	1.05437	1.06402	1.03785	0.855738	0.992726	0	4.945e-10
dELDIVIPTIR	3	3	3	O22666;Q9SRT9;Q9LFW1	N-Term(iTRAQ8plex)							0	7.398e-07
vVDLIVHMSk	14	6	2	P25858;Q9FX54	N-Term(iTRAQ8plex); K10(iTRAQ8plex)							0	1.286e-08
kLDVLSNDVFVNALVSSGR	1	1	1	Q9MA79	N-Term(iTRAQ8plex); K1(iTRAQ8plex)	0.800393	0.942333	0.849816	1.21973	1.16231	1.20098	0	9.368e-12
tALSHVDNLISGVTR	1	3	1	P49209	N-Term(iTRAQ8plex)	0.846941	1.12029	0.86965	1.06059	1.14721	1.07315	0	8.351e-11
nYSQFVSFPIYTWQEk	1	1	1	F4JFN3	N-Term(iTRAQ8plex); K16(iTRAQ8plex)	0.986732	0.942712	0.929736	0.948181	1.18607	1.09012	0	4.551e-09
sAIVQVDAAPFk	3	2	1	Q93VG5	N-Term(iTRAQ8plex); K12(iTRAQ8plex)	1.01994	0.983342	1.08424	0.968311	1.01405	0.93449	0	4.459e-08
vIENANVIMATYEDPLLGDVQVYPEk	2	1	1	Q9ASR1	N-Term(iTRAQ8plex); K26(iTRAQ8plex)	0.969763	1.02975	0.902606	1.14811	1.15243	0.882036	0	9.474e-13
aSMMQPQIILLk	1	1	1	Q9SF16	N-Term(Acetyl); K12(iTRAQ8plex)	1.17757	0.80752	1.18808	0.928241	1.02663	0.874456	0	0.0004599
gkEQSAASGDQTQIQR	4	1	1	Q9LE44	N-Term(iTRAQ8plex); K2(iTRAQ8plex)	0.68538	0.656015	0.764519	1.297	1.60793	1.22075	0	1.565e-11
fGGSDNDELLQSFTSLFk	2	1	1	Q9M1X2	N-Term(iTRAQ8plex); K18(iTRAQ8plex)	0.965886	1.26073	1.11253	0.90198	0.921887	0.754739	0	4.191e-09
mATNLTDQFAALAALSQNPGk	2	5	1	Q8H0S9	N-Term(iTRAQ8plex); K21(iTRAQ8plex)	1.25407	1.00728	0.912437	0.959583	0.836602	0.979726	0	3.276e-11
[truncated: 15,216 more rows]
