# Supplementary material for: Arabidopsis MDN1 Is Involved in the Establishment of a Normal Seed Proteome and Seed Germination
Source: Front Plant Sci. 2019 Sep 10;10:1118. doi: 10.3389/fpls.2019.01118 (PMC6746975; doi:10.3389/fpls.2019.01118)
Supplement: Supplementary file 5 [file Table_2.xlsx]

## Sheet: Sheet1
Supplementary Dataset S2. The common proteins in both wild type and mdn1-1 detected with iTRAQ-based LC-MS/MS.
Acctssion, protein accession number from Uniprot.
Description, protein description from Uniprot.
Score, protein score derived from weighted peptide scores.
Coverage, protein sequence coverage %.
calc. pI, pI value of the protien
Accession	Description	Score	Coverage	# Proteins	# Unique Peptides	# Peptides	# PSMs	# AAs	MW [kDa]	calc. pI	wt_rep1	wt_rep2	wt_rep3	mdn1-1_rep1	mdn1-1_rep2	mdn1-1_rep3	Group_mdn1-1.average	Group_wt.average	Group_mdn1-1.vs.Group_wt.FC	pvalue
Q96318	12S seed storage protein CRC OS=Arabidopsis thaliana GN=CRC PE=1 SV=1 - [CRU3_ARATH]	60099.2	91.41	2	36	36	4217	524	58.2	6.99	0.914	0.918	0.946	1.117	1.083	1.09	1.09667	0.926	1.18431	0.000294071
P15455	12S seed storage protein CRA1 OS=Arabidopsis thaliana GN=CRA1 PE=1 SV=2 - [CRU1_ARATH]	16668.2	80.08	4	33	35	1780	472	52.6	7.8	1.02	1.013	1.083	0.986	0.95	0.949	0.961667	1.03867	0.925866	0.0385805
P15456	12S seed storage protein CRB OS=Arabidopsis thaliana GN=CRB PE=1 SV=2 - [CRU2_ARATH]	11721.4	77.58	2	26	28	1332	455	50.5	6.99	0.944	0.933	0.978	1.069	1.042	1.054	1.055	0.951667	1.10858	0.00271652
Q9ZWA9	12S seed storage protein CRD OS=Arabidopsis thaliana GN=CRD PE=1 SV=1 - [CRU4_ARATH]	5856.1	63.19	1	24	24	458	451	49.6	5.71	1.017	0.987	1.034	0.998	1.019	0.963	0.993333	1.01267	0.980908	0.416266
P0DKC6	11-beta-hydroxysteroid dehydrogenase 1B OS=Arabidopsis thaliana GN=HSD1 PE=1 SV=1 - [HSD1B_ARATH]	5647.02	78.8	2	25	25	522	349	39.1	6.25	1.026	1.073	1.056	0.933	0.932	0.92	0.928333	1.05167	0.882726	0.00100979
Q9LUJ7	Vicilin-like seed storage protein At3g22640 OS=Arabidopsis thaliana GN=PAP85 PE=2 SV=1 - [PAP85_ARATH]	4569.55	72.84	1	32	32	478	486	55	7.14	0.786	0.831	0.844	1.213	1.224	1.174	1.20367	0.820333	1.46729	7.87589e-05
Q9SIN3	Late embryogenesis abundant domain-containing protein OS=Arabidopsis thaliana GN=At2g42560 PE=4 SV=1 - [Q9SIN3_ARATH]	3889.97	76.22	4	58	58	406	635	67.2	6.09	0.892	0.896	0.926	1.102	1.23	1.044	1.12533	0.904667	1.24392	0.0169371
P15459	2S seed storage protein 3 OS=Arabidopsis thaliana GN=AT2S3 PE=1 SV=1 - [2SS3_ARATH]	3182.74	75	1	6	12	671	164	18.8	7.8	0.632	0.669	0.687	1.404	1.42	1.311	1.37833	0.662667	2.07998	4.50829e-05
P15458	2S seed storage protein 2 OS=Arabidopsis thaliana GN=AT2S2 PE=2 SV=1 - [2SS2_ARATH]	3089.86	48.24	2	2	8	475	170	19.3	7.15	1.031	0.727	0.927	1.224	1.05	1.213	1.16233	0.895	1.2987	0.0643291
Q9LW12	AT3g15670/MSJ11_7 OS=Arabidopsis thaliana GN=At3g15670 PE=2 SV=1 - [Q9LW12_ARATH]	2931.49	72.89	4	18	18	436	225	24.2	8.85	0.683	0.699	0.735	1.379	1.414	1.283	1.35867	0.705667	1.92537	0.00010057
Q42431	Oleosin 20.3 kDa OS=Arabidopsis thaliana GN=OL2 PE=2 SV=1 - [OLEO4_ARATH]	2777.01	39.79	1	8	8	299	191	20.3	7.58	1.07	1.094	1.102	0.869	0.937	0.811	0.872333	1.08867	0.801286	0.00455127
Q8VYL3	Aspartic proteinase A2 OS=Arabidopsis thaliana GN=APA2 PE=2 SV=1 - [APA2_ARATH]	2748.72	35.48	1	9	12	259	513	55.7	6.34	0.939	0.866	0.949	1.099	1.071	1.061	1.077	0.918	1.1732	0.00507665
O65390	Aspartic proteinase A1 OS=Arabidopsis thaliana GN=APA1 PE=1 SV=1 - [APA1_ARATH]	2346.62	60.28	6	18	21	219	506	54.6	5.54	1.073	1.153	1.137	0.877	0.883	0.838	0.866	1.121	0.772525	0.000830863
Q9FZ42	Glucose and ribitol dehydrogenase homolog 1 OS=Arabidopsis thaliana GN=At1g54870 PE=2 SV=1 - [GRDH1_ARATH]	2004.2	73.96	2	21	21	192	288	31.4	6.54	0.999	1.108	1.003	0.947	0.974	0.925	0.948667	1.03667	0.915113	0.0836791
P25858	Glyceraldehyde-3-phosphate dehydrogenase GAPC1, cytosolic OS=Arabidopsis thaliana GN=GAPC1 PE=1 SV=2 - [G3PC1_ARATH]	1848.83	79.59	7	1	25	202	338	36.9	7.12	0.966	1.058	1.05	0.968	1.131	0.904	1.001	1.02467	0.976903	0.764205
Q9FX54	Glyceraldehyde-3-phosphate dehydrogenase GAPC2, cytosolic OS=Arabidopsis thaliana GN=GAPC2 PE=1 SV=1 - [G3PC2_ARATH]	1836.83	79.59	9	1	25	201	338	36.9	7.18	0.995	1.119	1.039	0.944	1.049	0.835	0.942667	1.051	0.896924	0.205091
Q39132	At1g14950/F10B6_18 OS=Arabidopsis thaliana GN=MLP1 PE=2 SV=1 - [Q39132_ARATH]	1733.91	88.39	10	5	14	235	155	17.9	6.87	0.907	0.911	0.931	1.104	1.138	1.081	1.10767	0.916333	1.2088	0.000457476
Q9SK09	Vicilin-like seed storage protein At2g28490 OS=Arabidopsis thaliana GN=At2g28490 PE=2 SV=1 - [VCL22_ARATH]	1733.59	49.32	1	22	22	309	511	55.7	6.16	0.811	0.773	0.848	1.237	1.236	1.252	1.24167	0.810667	1.53166	4.1951e-05
B9DGU8	AT5G07190 protein OS=Arabidopsis thaliana GN=ATS3 PE=2 SV=1 - [B9DGU8_ARATH]	1714.93	47.03	4	7	7	117	185	19.9	7.15	0.796	0.764	0.86	1.226	1.187	1.214	1.209	0.806667	1.49876	0.000190463
P25696	Bifunctional enolase 2/transcriptional activator OS=Arabidopsis thaliana GN=ENO2 PE=1 SV=1 - [ENO2_ARATH]	1670.02	76.58	3	24	25	112	444	47.7	5.77	1.043	1.131	1.05	0.897	0.973	0.863	0.911	1.07467	0.847705	0.0190992
Q9ZRT9	LEA OS=Arabidopsis thaliana GN=lea32 PE=2 SV=1 - [Q9ZRT9_ARATH]	1620.45	67.25	3	29	29	233	287	31.3	5.3	0.659	0.707	0.694	1.363	1.608	1.262	1.411	0.686667	2.05485	0.00221152
Q9ASR1	Elongation factor 2 OS=Arabidopsis thaliana GN=LOS1 PE=1 SV=1 - [EF2_ARATH]	1507.37	63.82	1	34	52	194	843	93.8	6.25	1.017	1.069	1.047	0.954	0.949	0.929	0.944	1.04433	0.903926	0.00403156
Q9XI01	Protein disulfide isomerase-like 1-1 OS=Arabidopsis thaliana GN=PDIL1-1 PE=1 SV=1 - [PDI11_ARATH]	1446.85	70.26	2	30	36	153	501	55.6	4.92	1.06	1.1	1.09	0.899	0.971	0.838	0.902667	1.08333	0.833231	0.0109386
Q39165	Oleosin 21.2 kDa OS=Arabidopsis thaliana GN=At5g40420 PE=1 SV=1 - [OLEO2_ARATH]	1402.21	38.19	2	10	10	314	199	21.3	9.36	1.072	1.075	1.129	0.894	0.922	0.833	0.883	1.092	0.808608	0.00288723
Q9M892	AT3g02480/F16B3_11 OS=Arabidopsis thaliana GN=F16B3.11 PE=2 SV=1 - [Q9M892_ARATH]	1389.36	88.24	1	9	9	113	68	7.1	9.04	0.618	0.649	0.668	1.414	1.51	1.372	1.432	0.645	2.22016	5.4198e-05
Q96270	At1g52690/F6D8_9 OS=Arabidopsis thaliana GN=F6D8.9 PE=2 SV=1 - [Q96270_ARATH]	1379.63	73.96	3	15	15	163	169	18.1	7.61	0.619	0.602	0.654	1.433	1.495	1.374	1.434	0.625	2.2944	2.92063e-05
O04005	1-Cys peroxiredoxin PER1 OS=Arabidopsis thaliana GN=PER1 PE=2 SV=1 - [REHY_ARATH]	1368.78	91.2	2	21	21	251	216	24.1	6.61	0.71	0.735	0.731	1.323	1.423	1.258	1.33467	0.725333	1.84007	0.000233031
Q9LIF9	Beta-glucosidase 19 OS=Arabidopsis thaliana GN=BGLU19 PE=2 SV=1 - [BGL19_ARATH]	1368.74	49.91	19	26	26	182	527	60	6.65	1.031	1.076	1.081	0.931	0.946	0.869	0.915333	1.06267	0.861355	0.00659517
P34790	Peptidyl-prolyl cis-trans isomerase CYP18-3 OS=Arabidopsis thaliana GN=CYP18-3 PE=1 SV=1 - [CP18C_ARATH]	1311.35	89.53	6	7	15	181	172	18.4	7.81	0.778	0.793	0.806	1.23	1.346	1.151	1.24233	0.792333	1.56794	0.00141121
Q9LF88	Late embryogenesis abundant protein-like OS=Arabidopsis thaliana GN=F8J2_210 PE=2 SV=1 - [Q9LF88_ARATH]	1277.46	57.2	2	33	36	174	479	52.1	5.39	0.642	0.641	0.682	1.391	1.639	1.306	1.44533	0.655	2.20662	0.00142923
Q39043	Mediator of RNA polymerase II transcription subunit 37f OS=Arabidopsis thaliana GN=MED37F PE=1 SV=2 - [MD37F_ARATH]	1226.93	54.34	2	4	36	123	668	73.5	5.21	1.107	1.176	1.11	0.833	0.866	0.818	0.839	1.131	0.741821	0.000391759
Q9LKR3	Mediator of RNA polymerase II transcription subunit 37a OS=Arabidopsis thaliana GN=MED37A PE=1 SV=1 - [MD37A_ARATH]	1221.17	52.62	2	3	35	119	669	73.6	5.17	1.21	1.217	1.176	0.771	0.865	0.656	0.764	1.201	0.636137	0.00210369
P15460	2S seed storage protein 4 OS=Arabidopsis thaliana GN=AT2S4 PE=2 SV=1 - [2SS4_ARATH]	1216.2	64.46	1	13	15	486	166	19.2	7.5	0.69	0.646	0.715	1.345	1.425	1.339	1.36967	0.683667	2.00341	3.68043e-05
Q9SAJ4	Phosphoglycerate kinase OS=Arabidopsis thaliana GN=T8K14.3 PE=1 SV=1 - [Q9SAJ4_ARATH]	1209.48	76.31	4	23	27	106	401	42.1	5.68	1.118	1.159	1.167	0.828	0.864	0.785	0.825667	1.148	0.719222	0.000299533
Q03250	Glycine-rich RNA-binding protein 7 OS=Arabidopsis thaliana GN=RBG7 PE=1 SV=1 - [RBG7_ARATH]	1205.19	53.41	4	6	8	56	176	16.9	6.15	0.887	0.876	0.933	1.148	1.202	1.069	1.13967	0.898667	1.26818	0.00472255
Q9FK91	Poly [ADP-ribose] polymerase 3 OS=Arabidopsis thaliana GN=PARP3 PE=2 SV=2 - [PARP3_ARATH]	1191.61	56.02	3	37	37	96	814	91.3	5.22	1.043	1.15	1.082	0.901	0.961	0.865	0.909	1.09167	0.832672	0.0121346
Q941A4	Oil body-associated protein 2A OS=Arabidopsis thaliana GN=OBAP2A PE=2 SV=1 - [OBP2A_ARATH]	1175.42	83.4	1	21	21	208	247	27.8	6.35	1.137	1.163	1.158	0.843	0.86	0.794	0.832333	1.15267	0.722094	0.000114505
Q9LQT7	F10B6.35 OS=Arabidopsis thaliana PE=4 SV=1 - [Q9LQT7_ARATH]	1161.04	37.61	6	11	23	222	561	64.8	6.98	0.848	0.919	0.88	1.126	1.284	1.063	1.15767	0.882333	1.31205	0.0161538
Q9SKQ0	Peptidyl-prolyl cis-trans isomerase CYP19-2 OS=Arabidopsis thaliana GN=CYP19-2 PE=1 SV=1 - [CP19B_ARATH]	1133.76	66.67	5	3	11	116	174	18.5	8.16	0.851	0.804	0.798	1.157	1.413	1.195	1.255	0.817667	1.53486	0.00582245
F4JVN6	Tripeptidyl-peptidase 2 OS=Arabidopsis thaliana GN=TPP2 PE=1 SV=1 - [TPPII_ARATH]	1132.68	51.01	4	60	60	168	1380	152.3	6.07	1.029	1.1	1.059	0.944	0.962	0.906	0.937333	1.06267	0.882058	0.00896347
Q03251	Glycine-rich RNA-binding protein 8 OS=Arabidopsis thaliana GN=RBG8 PE=1 SV=1 - [RBG8_ARATH]	1126.65	65.09	7	7	9	45	169	16.6	5.68	0.826	0.824	0.838	1.196	1.221	1.238	1.21833	0.829333	1.46905	7.33147e-06
Q9ZP06	Malate dehydrogenase 1, mitochondrial OS=Arabidopsis thaliana GN=At1g53240 PE=1 SV=1 - [MDHM1_ARATH]	1124.4	55.72	1	6	16	75	341	35.8	8.35	0.767	0.762	0.729	1.323	1.274	1.136	1.24433	0.752667	1.65323	0.00100916
Q9LHA8	Probable mediator of RNA polymerase II transcription subunit 37c OS=Arabidopsis thaliana GN=MED37C PE=1 SV=1 - [MD37C_ARATH]	1117.2	58.15	1	15	40	151	650	71.1	5.25	0.995	1.082	1.065	0.932	0.97	0.878	0.926667	1.04733	0.884787	0.0328762
Q9LF98	Fructose-bisphosphate aldolase OS=Arabidopsis thaliana GN=F8J2_100 PE=1 SV=1 - [Q9LF98_ARATH]	1091.47	81.84	3	9	25	94	358	38.5	6.46	1.073	1.079	1.15	0.877	0.907	0.897	0.893667	1.10067	0.811932	0.00139893
Q9LIF8	Jacalin-related lectin 36 OS=Arabidopsis thaliana GN=JAL36 PE=2 SV=1 - [JAL36_ARATH]	1075.63	75.43	25	28	29	108	460	49.7	6.49	0.948	1.001	0.977	1.033	1.102	0.984	1.03967	0.975333	1.06596	0.161384
Q8L831	Nudix hydrolase 3 OS=Arabidopsis thaliana GN=NUDT3 PE=1 SV=1 - [NUDT3_ARATH]	1071.91	62.44	4	48	48	144	772	86.8	5.44	0.981	1.089	1.015	0.971	1.024	0.929	0.974667	1.02833	0.947812	0.271355
F4JQG6	Vicilin-like seed storage protein At4g36700 OS=Arabidopsis thaliana GN=At4g36700 PE=3 SV=1 - [VCL43_ARATH]	1071.8	29.31	1	14	14	103	522	59	5.53	1.061	1.202	1.102	0.868	0.899	0.851	0.872667	1.12167	0.778009	0.00487301
Q56WD9	3-ketoacyl-CoA thiolase 2, peroxisomal OS=Arabidopsis thaliana GN=PED1 PE=1 SV=2 - [THIK2_ARATH]	1053.3	58.23	3	18	20	79	462	48.5	8.34	0.892	0.879	0.889	1.155	1.196	1.139	1.16333	0.886667	1.31203	9.19189e-05
O50008	5-methyltetrahydropteroyltriglutamate--homocysteine methyltransferase 1 OS=Arabidopsis thaliana GN=MS1 PE=1 SV=1 - [METE1_ARATH]	1052.73	53.59	12	42	43	140	765	84.3	6.51	1.02	1.146	1.055	0.936	0.953	0.867	0.918667	1.07367	0.855635	0.0277566
P29525	Oleosin 18.5 kDa OS=Arabidopsis thaliana GN=At4g25140 PE=1 SV=1 - [OLEO1_ARATH]	1032.89	42.77	1	10	10	415	173	18.6	9.44	1.105	1.139	1.151	0.834	0.828	0.8	0.820667	1.13167	0.725184	5.63833e-05
P83483	ATP synthase subunit beta-1, mitochondrial OS=Arabidopsis thaliana GN=At5g08670 PE=1 SV=1 - [ATPBM_ARATH]	1006.61	57.91	5	24	25	92	556	59.6	6.62	1.072	1.045	1.068	0.957	0.966	0.925	0.949333	1.06167	0.894192	0.00170831
Q07187	Em-like protein GEA1 OS=Arabidopsis thaliana GN=EM1 PE=2 SV=1 - [EM1_ARATH]	1005.79	78.95	2	14	14	158	152	16.6	6.1	0.666	0.668	0.711	1.373	1.564	1.253	1.39667	0.681667	2.0489	0.00146175
P57751	UTP--glucose-1-phosphate uridylyltransferase 1 OS=Arabidopsis thaliana GN=UGP1 PE=2 SV=1 - [UGPA1_ARATH]	1002.09	66.81	2	13	29	111	470	51.9	6.01	1.098	1.165	1.138	0.849	0.874	0.813	0.845333	1.13367	0.745663	0.000393851
Q9SRH5	Mitochondrial outer membrane protein porin 1 OS=Arabidopsis thaliana GN=VDAC1 PE=1 SV=3 - [VDAC1_ARATH]	996.81	55.8	3	10	14	64	276	29.4	8.73	1.033	1.115	1.105	0.91	0.962	0.847	0.906333	1.08433	0.835844	0.013393
Q9FH31	2S seed storage protein 5 OS=Arabidopsis thaliana GN=SESA5 PE=1 SV=1 - [2SS5_ARATH]	986.6	50.91	1	9	9	229	165	18.9	7.59	0.666	0.622	0.676	1.402	1.476	1.387	1.42167	0.654667	2.17159	1.82463e-05
F4JGD2	Aspartic proteinase A3 OS=Arabidopsis thaliana GN=At4g04460 PE=3 SV=1 - [F4JGD2_ARATH]	973.87	45.04	3	18	18	82	504	55.1	7.34	0.932	0.967	0.994	1.069	1.119	0.997	1.06167	0.964333	1.10093	0.070303
Q9LYK8	Superoxide dismutase [Mn] 2, mitochondrial OS=Arabidopsis thaliana GN=MSD2 PE=2 SV=1 - [SODM2_ARATH]	950.72	59.34	13	11	11	95	241	26.9	6.76	1.15	1.104	1.129	0.837	0.868	0.831	0.845333	1.12767	0.749631	8.74415e-05
Q9ZVY7	Oil body-associated protein 1A OS=Arabidopsis thaliana GN=OBAP1A PE=2 SV=1 - [OBP1A_ARATH]	946.65	58.51	1	15	16	132	241	27.3	6.71	1.102	1.148	1.154	0.843	0.879	0.775	0.832333	1.13467	0.733549	0.000948802
Q949U7	Peroxiredoxin-2E, chloroplastic OS=Arabidopsis thaliana GN=PRXIIE PE=1 SV=2 - [PRX2E_ARATH]	937.16	52.99	1	11	11	80	234	24.7	9.03	1.044	1.139	1.114	0.879	0.924	0.818	0.873667	1.099	0.794965	0.00575416
Q9SKP0	Late embryogenesis abundant protein (AtECP63) OS=Arabidopsis thaliana GN=ECP63 PE=4 SV=1 - [Q9SKP0_ARATH]	929.65	56.47	10	24	27	129	448	48.5	5.54	0.75	0.746	0.773	1.289	1.454	1.21	1.31767	0.756333	1.74218	0.00148891
P53492	Actin-7 OS=Arabidopsis thaliana GN=ACT7 PE=1 SV=1 - [ACT7_ARATH]	927.74	56.76	18	6	18	107	377	41.7	5.49	1.071	1.127	1.053	0.889	0.982	0.858	0.909667	1.08367	0.839434	0.0160211
F4K0K7	Dehydrin Rab18 OS=Arabidopsis thaliana GN=RAB18 PE=3 SV=1 - [F4K0K7_ARATH]	922.16	36.76	2	5	5	58	185	18.3	8.31	0.658	0.698	0.671	1.344	1.472	1.281	1.36567	0.675667	2.02121	0.000274792
P22953	Probable mediator of RNA polymerase II transcription subunit 37e OS=Arabidopsis thaliana GN=MED37E PE=1 SV=3 - [MD37E_ARATH]	921.12	52.07	3	7	33	119	651	71.3	5.12	0.947	1.01	0.967	1.016	1.111	1.024	1.05033	0.974667	1.07763	0.101055
P93819	Malate dehydrogenase, cytoplasmic 1 OS=Arabidopsis thaliana GN=MDH1 PE=1 SV=2 - [MDHC1_ARATH]	918.46	78.31	10	12	23	78	332	35.5	6.55	0.858	0.855	0.891	1.159	1.294	1.109	1.18733	0.868	1.3679	0.00481021
Q9LJ95	Late embryogenesis abundant protein 32 OS=Arabidopsis thaliana GN=ECP31 PE=2 SV=1 - [LEA32_ARATH]	884.39	82.81	1	14	14	93	256	26.8	5.52	0.86	0.809	0.887	1.209	1.212	1.133	1.18467	0.852	1.39045	0.000647861
O64586	Pollen Ole e 1 allergen and extensin family protein OS=Arabidopsis thaliana GN=At2g34700 PE=2 SV=1 - [O64586_ARATH]	867.02	49.71	1	10	10	116	175	18.8	9.35	0.949	0.957	0.968	1.086	1.059	1.024	1.05633	0.958	1.10264	0.00634944
Q9S9N1	Heat shock 70 kDa protein 5 OS=Arabidopsis thaliana GN=HSP70-5 PE=2 SV=1 - [HSP7E_ARATH]	863.82	50	2	22	32	124	646	70.9	5.41	1.079	1.17	1.135	0.852	0.893	0.832	0.859	1.128	0.761525	0.00109744
Q9SJQ9	Fructose-bisphosphate aldolase OS=Arabidopsis thaliana GN=At2g36460 PE=2 SV=1 - [Q9SJQ9_ARATH]	859.92	67.32	4	10	22	70	358	38.4	7.39	1.004	1.045	1.031	0.969	0.988	0.939	0.965333	1.02667	0.94026	0.0303075
O49326	Nitrile-specifier protein 2 OS=Arabidopsis thaliana GN=NSP2 PE=2 SV=1 - [JAL21_ARATH]	853.02	69.43	6	24	27	98	471	51.2	5.76	0.905	1.004	0.945	1.06	1.163	1.014	1.079	0.951333	1.1342	0.072217
Q9FJS3	Glycine-rich protein OS=Arabidopsis thaliana GN=At5g35660 PE=4 SV=1 - [Q9FJS3_ARATH]	845.56	47.52	1	7	7	78	343	31.6	7.77	0.525	0.541	0.562	1.501	1.745	1.422	1.556	0.542667	2.86732	0.000489804
P15457	2S seed storage protein 1 OS=Arabidopsis thaliana GN=AT2S1 PE=1 SV=1 - [2SS1_ARATH]	812.36	40.85	2	7	7	313	164	19	5.91	0.691	0.646	0.702	1.355	1.409	1.343	1.369	0.679667	2.01422	1.3094e-05
P48491	Triosephosphate isomerase, cytosolic OS=Arabidopsis thaliana GN=CTIMC PE=1 SV=2 - [TPIS_ARATH]	804.33	57.87	2	12	13	59	254	27.2	5.5	1.021	1.078	1.093	0.919	0.963	0.906	0.929333	1.064	0.873434	0.00848187
Q42560	Aconitate hydratase 1 OS=Arabidopsis thaliana GN=ACO1 PE=1 SV=2 - [ACO1_ARATH]	796.34	48.78	2	25	36	98	898	98.1	6.4	1.046	1.084	1.106	0.881	0.946	0.867	0.898	1.07867	0.832509	0.00382593
Q8GTY0	Elongation factor 1-alpha 4 OS=Arabidopsis thaliana GN=A4 PE=1 SV=2 - [EF1A4_ARATH]	788.43	45.88	17	24	24	212	449	49.5	9.11	0.994	1.109	1.025	0.94	0.998	0.9	0.946	1.04267	0.907289	0.0961045
Q9LYR4	Aldolase-type TIM barrel family protein OS=Arabidopsis thaliana GN=T22N19_70 PE=2 SV=1 - [Q9LYR4_ARATH]	778.09	60.5	1	23	23	64	438	47.7	6.43	1.057	1.151	1.089	0.884	0.914	0.889	0.895667	1.099	0.814983	0.00221008
Q8GXW0	At5g01670 OS=Arabidopsis thaliana GN=At5g01670 PE=2 SV=1 - [Q8GXW0_ARATH]	774.25	86.02	4	27	27	110	322	36.6	6.7	1.045	1.107	1.107	0.905	0.966	0.841	0.904	1.08633	0.832157	0.0118339
P41376	Eukaryotic initiation factor 4A-1 OS=Arabidopsis thaliana GN=TIF4A-1 PE=1 SV=1 - [IF4A1_ARATH]	772.31	49.51	11	6	22	88	412	46.7	5.68	0.997	1.125	1.026	0.934	1.027	0.89	0.950333	1.04933	0.905654	0.15163
O23255	Adenosylhomocysteinase 1 OS=Arabidopsis thaliana GN=SAHH1 PE=1 SV=1 - [SAHH1_ARATH]	768.84	60.21	12	9	24	88	485	53.3	5.97	1.041	1.177	1.072	0.925	0.945	0.836	0.902	1.09667	0.822492	0.0214188
Q9LD57	Phosphoglycerate kinase 1, chloroplastic OS=Arabidopsis thaliana GN=PGK1 PE=1 SV=1 - [PGKH1_ARATH]	768.47	55.51	1	9	21	63	481	50.1	6.24	1.067	1.095	1.13	0.913	0.881	0.869	0.887667	1.09733	0.808931	0.000733382
Q9LKA3	Malate dehydrogenase 2, mitochondrial OS=Arabidopsis thaliana GN=At3g15020 PE=2 SV=1 - [MDHM2_ARATH]	761.16	41.35	2	3	13	53	341	35.9	8.19	0.911	0.84	0.858	1.205	1.241	1.004	1.15	0.869667	1.32235	0.0217258
Q84WS0	Subtilisin-like protease SBT1.1 OS=Arabidopsis thaliana GN=SBTI1.1 PE=1 SV=1 - [SBT11_ARATH]	759.38	25.06	1	14	15	49	774	83.2	8.18	1.008	1.068	1.003	0.964	1.047	0.947	0.986	1.02633	0.960702	0.34026
P41377	Eukaryotic initiation factor 4A-2 OS=Arabidopsis thaliana GN=TIF4A-2 PE=1 SV=1 - [IF4A2_ARATH]	754.34	46.12	3	4	20	78	412	46.7	5.68	0.928	1.159	1.01	0.854	1.037	1.095	0.995333	1.03233	0.964159	0.728148
O65719	Heat shock 70 kDa protein 3 OS=Arabidopsis thaliana GN=HSP70-3 PE=1 SV=1 - [HSP7C_ARATH]	752.66	42.22	2	4	25	96	649	71.1	5.07	0.964	1.043	1.068	1.062	0.9	1.07	1.01067	1.025	0.986016	0.832831
Q9LZC3	Malate synthase OS=Arabidopsis thaliana GN=MLS PE=1 SV=1 - [MASY_ARATH]	751.87	57.12	5	28	28	83	562	63.8	7.94	0.94	0.997	0.963	1.035	1.032	1.032	1.033	0.966667	1.06862	0.0161403
P25819	Catalase-2 OS=Arabidopsis thaliana GN=CAT2 PE=2 SV=3 - [CATA2_ARATH]	739.07	43.29	5	9	19	100	492	56.9	7.12	0.767	0.746	0.768	1.223	1.371	1.244	1.27933	0.760333	1.6826	0.00037563
P22954	Probable mediator of RNA polymerase II transcription subunit 37c OS=Arabidopsis thaliana GN=MED37D PE=1 SV=2 - [MD37D_ARATH]	733.14	40.12	2	3	26	97	653	71.3	5.12	1.027	1.006	0.936	1.089	1.065	0.985	1.04633	0.989667	1.05726	0.246467
Q0WMZ5	Outer envelope pore protein 16-2, chloroplastic OS=Arabidopsis thaliana GN=OEP162 PE=2 SV=1 - [OP162_ARATH]	730.68	69.1	1	9	9	46	178	18.7	7.64	1.084	1.151	1.115	0.837	0.845	0.816	0.832667	1.11667	0.745672	0.000179671
Q9SMX3	Mitochondrial outer membrane protein porin 3 OS=Arabidopsis thaliana GN=VDAC3 PE=1 SV=3 - [VDAC3_ARATH]	726.68	52.92	4	10	14	55	274	29.2	8.21	1.031	1.109	1.056	0.936	0.976	0.905	0.939	1.06533	0.881414	0.0148969
O22263	Protein disulfide-isomerase like 2-1 OS=Arabidopsis thaliana GN=PDIL2-1 PE=2 SV=1 - [PDI21_ARATH]	724.16	56.23	6	21	22	81	361	39.5	6.06	0.956	1.011	1.012	0.991	1.084	0.983	1.01933	0.993	1.02652	0.519402
F4JBY2	Transketolase OS=Arabidopsis thaliana GN=At3g60750 PE=1 SV=1 - [F4JBY2_ARATH]	705.44	41.22	2	16	25	77	740	79.8	6.43	1.062	1.105	1.066	0.899	0.933	0.865	0.899	1.07767	0.83421	0.00172449
Q42330	Defensin-like protein 192 OS=Arabidopsis thaliana GN=ATTI7 PE=2 SV=2 - [DF192_ARATH]	690.19	35.71	2	3	3	45	98	11	6.47	0.836	0.67	0.896	1.266	1.197	1.267	1.24333	0.800667	1.55287	0.0034512
Q9SRT9	UDP-arabinopyranose mutase 1 OS=Arabidopsis thaliana GN=RGP1 PE=1 SV=1 - [RGP1_ARATH]	687.56	62.18	1	5	20	95	357	40.6	5.92	1.112	1.1	1.039	0.918	0.962	0.849	0.909667	1.08367	0.839434	0.0120564
Q42403	Thioredoxin H3 OS=Arabidopsis thaliana GN=TRX3 PE=1 SV=1 - [TRXH3_ARATH]	681.27	72.03	2	9	9	52	118	13.1	5.14	1.118	1.168	1.143	0.817	0.896	0.768	0.827	1.143	0.723535	0.00138654
P25856	Glyceraldehyde-3-phosphate dehydrogenase GAPA1, chloroplastic OS=Arabidopsis thaliana GN=GAPA1 PE=1 SV=3 - [G3PA1_ARATH]	680.96	48.23	4	6	19	76	396	42.5	7.75	1.135	1.134	1.125	0.873	0.831	0.745	0.816333	1.13133	0.721567	0.00113374
B9DHU0	AT1G20620 protein (Fragment) OS=Arabidopsis thaliana GN=At1g20620 PE=2 SV=1 - [B9DHU0_ARATH]	676.43	47.6	11	14	19	88	458	53	7.46	1.018	1.07	1.052	0.945	0.989	0.893	0.942333	1.04667	0.900318	0.0300557
Q9SLA8	Enoyl-[acyl-carrier-protein] reductase [NADH], chloroplastic OS=Arabidopsis thaliana GN=MOD1 PE=1 SV=1 - [FABI_ARATH]	662.97	42.31	1	12	12	53	390	41.2	9	1.133	1.166	1.185	0.824	0.823	0.801	0.816	1.16133	0.702641	3.42262e-05
Q9SS98	Oleosin 5 OS=Arabidopsis thaliana GN=At3g01570 PE=2 SV=1 - [OLEO5_ARATH]	657.4	23.5	1	6	6	137	183	19.7	7.77	1.098	1.129	1.116	0.846	0.899	0.791	0.845333	1.11433	0.7586	0.00115588
O81270	Peroxygenase 1 OS=Arabidopsis thaliana GN=PXG1 PE=1 SV=1 - [PXG1_ARATH]	655.69	53.06	1	13	15	135	245	28	6.23	1.05	1.136	1.065	0.891	0.947	0.842	0.893333	1.08367	0.824362	0.00914662
Q9STW6	Heat shock 70 kDa protein 6, chloroplastic OS=Arabidopsis thaliana GN=HSP70-6 PE=1 SV=1 - [HSP7F_ARATH]	655.16	38.02	1	8	25	82	718	76.5	5.2	1.057	1.097	1.098	0.908	0.926	0.899	0.911	1.084	0.840406	0.000382043
F4KG52	Low-temperature-induced 65 OS=Arabidopsis thaliana GN=LTI65 PE=4 SV=1 - [F4KG52_ARATH]	644.78	63.92	3	37	38	121	618	65.8	5.19	0.752	0.762	0.775	1.306	1.41	1.222	1.31267	0.763	1.7204	0.000554624
Q9M9P3	UTP--glucose-1-phosphate uridylyltransferase 2 OS=Arabidopsis thaliana GN=UGP2 PE=1 SV=1 - [UGPA2_ARATH]	642.02	52.45	1	8	24	79	469	51.7	6.13	1.062	0.957	1.039	0.972	0.907	0.978	0.952333	1.01933	0.934271	0.162128
Q9LPW0	Glyceraldehyde-3-phosphate dehydrogenase GAPA2, chloroplastic OS=Arabidopsis thaliana GN=GAPA2 PE=2 SV=1 - [G3PA2_ARATH]	638.32	45.86	4	3	16	64	399	42.8	8.05	1.101	1.099	1.167	0.893	0.887	0.777	0.852333	1.12233	0.75943	0.00352385
Q42406	Peptidyl-prolyl cis-trans isomerase CYP18-4 OS=Arabidopsis thaliana GN=CYP18-4 PE=1 SV=1 - [CP18D_ARATH]	638.31	90.7	4	11	15	81	172	18.4	8.69	0.643	0.678	0.719	1.379	1.56	1.257	1.39867	0.68	2.05686	0.00137416
Q9LJ97	Late embryogenesis abundant protein 31 OS=Arabidopsis thaliana GN=RAB28 PE=1 SV=1 - [LEA31_ARATH]	636.41	35.5	2	8	8	39	262	26.7	4.84	0.97	0.982	0.975	1.036	1.069	1.022	1.04233	0.975667	1.06833	0.00971665
Q9M7T0	Peroxiredoxin-2F, mitochondrial OS=Arabidopsis thaliana GN=PRXIIF PE=1 SV=2 - [PRX2F_ARATH]	635.28	48.76	2	10	10	44	201	21.4	8.9	0.646	0.634	0.652	1.382	1.603	1.36	1.44833	0.644	2.24896	0.000493339
Q96528	Catalase-1 OS=Arabidopsis thaliana GN=CAT1 PE=2 SV=3 - [CATA1_ARATH]	632.73	35.77	1	7	15	80	492	56.7	7.42	0.753	0.79	0.768	1.232	1.351	1.228	1.27033	0.770333	1.64907	0.00027875
Q9S7E4	Formate dehydrogenase, chloroplastic/mitochondrial OS=Arabidopsis thaliana GN=FDH1 PE=1 SV=1 - [FDH_ARATH]	626.75	47.92	3	19	19	98	384	42.4	7.5	0.948	0.971	0.951	1.068	1.188	1	1.08533	0.956667	1.13449	0.0810282
F4I3L1	Phosphoglycerate kinase OS=Arabidopsis thaliana GN=At1g56190 PE=3 SV=1 - [F4I3L1_ARATH]	625.41	48.4	2	5	17	51	405	42.6	5.54	1.019	0.953	1.008	0.967	0.991	0.973	0.977	0.993333	0.983557	0.492598
Q94EG6	Uncharacterized protein At5g02240 OS=Arabidopsis thaliana GN=At5g02240 PE=1 SV=1 - [Y5224_ARATH]	625.24	72.33	1	15	18	77	253	27.1	6.62	0.699	0.698	0.746	1.309	1.532	1.246	1.36233	0.714333	1.90714	0.00182724
Q9SUB2	Late embryogenesis abundant protein (LEA) family protein OS=Arabidopsis thaliana GN=T13K14.180 PE=2 SV=1 - [Q9SUB2_ARATH]	612.15	63.16	1	25	25	151	266	29.4	7.9	0.648	0.686	0.657	1.363	1.701	1.296	1.45333	0.663667	2.18985	0.0032939
Q8RY15	ARM repeat superfamily protein OS=Arabidopsis thaliana GN=At4g25580 PE=2 SV=1 - [Q8RY15_ARATH]	609.21	62.3	3	35	35	95	626	66.5	6.68	0.684	0.686	0.719	1.355	1.491	1.328	1.39133	0.696333	1.99809	0.000177141
Q02973	Em-like protein GEA6 OS=Arabidopsis thaliana GN=EM6 PE=2 SV=1 - [EM6_ARATH]	608.51	42.39	3	5	5	120	92	9.9	7.42	0.642	0.626	0.682	1.414	1.507	1.382	1.43433	0.65	2.20667	4.40883e-05
P52410	3-oxoacyl-[acyl-carrier-protein] synthase I, chloroplastic OS=Arabidopsis thaliana GN=KAS1 PE=2 SV=2 - [KASC1_ARATH]	601.94	54.12	2	21	21	56	473	50.4	8.06	1.094	1.1	1.165	0.863	0.857	0.814	0.844667	1.11967	0.754391	0.000560047
F4JLP5	Dihydrolipoyl dehydrogenase 2, chloroplastic OS=Arabidopsis thaliana GN=LPD2 PE=2 SV=2 - [PLPD2_ARATH]	587.97	38.27	1	5	17	58	567	60.1	7.61	1.199	1.134	1.156	0.807	0.806	0.788	0.800333	1.163	0.688163	5.50459e-05
O81822	17.7 kDa class II heat shock protein OS=Arabidopsis thaliana GN=HSP17.7 PE=2 SV=1 - [HS177_ARATH]	574.41	71.15	3	9	9	54	156	17.7	5.73	1.098	1.132	1.129	0.862	0.969	0.787	0.872667	1.11967	0.779399	0.0101739
O82191	NADP-dependent malic enzyme 1 OS=Arabidopsis thaliana GN=NADP-ME1 PE=1 SV=1 - [MAOP1_ARATH]	573.33	64.37	7	34	34	93	581	64.2	6.76	1.01	1.087	1.058	0.937	0.981	0.906	0.941333	1.05167	0.895087	0.0242552
Q8VZG7	AT5g07350/T2I1_60 OS=Arabidopsis thaliana GN=Tudor1 PE=1 SV=1 - [Q8VZG7_ARATH]	568.63	53.18	5	30	44	90	991	108.2	7.3	1.009	1.038	1.047	0.958	0.973	0.947	0.959333	1.03133	0.930187	0.00630562
Q9LFW1	UDP-arabinopyranose mutase 2 OS=Arabidopsis thaliana GN=RGP2 PE=1 SV=1 - [RGP2_ARATH]	568.2	61.39	1	7	21	86	360	40.9	6.13	1.058	1.031	1.031	0.943	0.968	0.97	0.960333	1.04	0.923397	0.00311578
P29197	Chaperonin CPN60, mitochondrial OS=Arabidopsis thaliana GN=CPN60 PE=1 SV=2 - [CH60A_ARATH]	561.73	47.49	1	11	25	58	577	61.2	5.78	0.976	0.97	0.978	1.034	1.034	1.005	1.02433	0.974667	1.05096	0.00756456
P19366	ATP synthase subunit beta, chloroplastic OS=Arabidopsis thaliana GN=atpB PE=1 SV=2 - [ATPB_ARATH]	557.78	49	3	17	18	49	498	53.9	5.5	1.066	1.055	1.05	0.943	0.948	0.92	0.937	1.057	0.886471	0.000258696
P34788	40S ribosomal protein S18 OS=Arabidopsis thaliana GN=RPS18A PE=1 SV=1 - [RS18_ARATH]	557.36	61.18	2	10	10	39	152	17.5	10.54	1.054	1.111	1.094	0.875	0.94	0.883	0.899333	1.08633	0.827861	0.00213814
F4J3P1	60S ribosomal protein L23 OS=Arabidopsis thaliana GN=emb2171 PE=3 SV=1 - [F4J3P1_ARATH]	544.21	77.6	4	9	9	51	125	13.4	10.05	0.754	0.756	0.761	1.312	1.383	1.279	1.32467	0.757	1.74989	5.06881e-05
A8MS68	Dihydrolipoyl dehydrogenase 1, chloroplastic OS=Arabidopsis thaliana GN=LPD1 PE=2 SV=1 - [PLPD1_ARATH]	542.21	32.91	1	4	16	55	623	66.6	8.41	1.114	1.196	1.086	0.891	0.785	0.865	0.847	1.132	0.748233	0.00342269
P17094	60S ribosomal protein L3-1 OS=Arabidopsis thaliana GN=ARP1 PE=2 SV=5 - [RL31_ARATH]	537.32	60.41	6	29	29	110	389	44.5	10.17	0.985	1.072	1.035	0.98	1.033	0.933	0.982	1.03067	0.952781	0.273122
Q96520	Peroxidase 12 OS=Arabidopsis thaliana GN=PER12 PE=1 SV=1 - [PER12_ARATH]	534.85	39.11	2	14	14	55	358	39.5	8.28	1.072	1.126	1.073	0.861	0.925	0.886	0.890667	1.09033	0.816876	0.00149837
P31167	ADP,ATP carrier protein 1, mitochondrial OS=Arabidopsis thaliana GN=AAC1 PE=1 SV=2 - [ADT1_ARATH]	531.94	31.76	7	5	13	58	381	41.4	9.83	1.073	1.109	1.104	0.894	0.939	0.808	0.880333	1.09533	0.803713	0.00581106
Q9SIB9	Aconitate hydratase 2, mitochondrial OS=Arabidopsis thaliana GN=ACO2 PE=1 SV=2 - [ACO2M_ARATH]	526.84	31.72	4	16	27	63	990	108.1	7.17	1.056	1.081	1.095	0.921	0.936	0.897	0.918	1.07733	0.852104	0.000584668
Q9SYG7	Aldehyde dehydrogenase family 7 member B4 OS=Arabidopsis thaliana GN=ALDH7B4 PE=2 SV=3 - [AL7B4_ARATH]	521.91	55.12	1	19	20	62	508	54.2	5.54	0.802	0.869	0.812	1.208	1.31	1.175	1.231	0.827667	1.48731	0.000907941
Q9SV68	Putative quinone-oxidoreductase homolog, chloroplastic OS=Arabidopsis thaliana GN=At4g13010 PE=2 SV=1 - [QORH_ARATH]	516.82	65.05	2	16	16	54	329	34.4	8.95	0.755	0.766	0.741	1.308	1.399	1.176	1.29433	0.754	1.71662	0.00115325
Q9C9C4	Enolase 1, chloroplastic OS=Arabidopsis thaliana GN=ENO1 PE=1 SV=1 - [ENO1_ARATH]	516.45	46.54	2	17	18	39	477	51.4	6.13	1.046	1.036	1.087	0.9	0.964	0.934	0.932667	1.05633	0.882928	0.00692444
Q9LFH5	60S ribosomal protein L12-2 OS=Arabidopsis thaliana GN=RPL12B PE=1 SV=1 - [RL122_ARATH]	515.27	62.05	2	3	9	31	166	18	8.97	0.832	0.884	0.82	1.119	1.16	1.211	1.16333	0.845333	1.37618	0.000654186
F4JB05	Ribosomal protein S5/Elongation factor G/III/V family protein OS=Arabidopsis thaliana GN=At3g12915 PE=4 SV=1 - [F4JB05_ARATH]	512	26.34	2	2	20	81	820	90.9	6.1	0.934	0.905	0.94	1.08	1.12	0.961	1.05367	0.926333	1.13746	0.0599934
Q9LU86	Peroxiredoxin Q, chloroplastic OS=Arabidopsis thaliana GN=PRXQ PE=1 SV=1 - [PRXQ_ARATH]	511.05	53.7	2	11	11	70	216	23.7	9.51	0.66	0.679	0.712	1.353	1.625	1.297	1.425	0.683667	2.08435	0.00193408
O65398	Lactoylglutathione lyase OS=Arabidopsis thaliana GN=F12F1.32 PE=1 SV=1 - [O65398_ARATH]	506.06	38.87	5	10	11	58	283	31.9	5.27	1.085	1.107	1.099	0.909	0.945	0.842	0.898667	1.097	0.819204	0.00301247
Q9FVT2	Probable elongation factor 1-gamma 2 OS=Arabidopsis thaliana GN=At1g57720 PE=2 SV=1 - [EF1G2_ARATH]	499.34	61.74	6	12	23	59	413	46.4	5.71	1.065	1.08	1.077	0.917	0.959	0.871	0.915667	1.074	0.852576	0.003585
P55737	Heat shock protein 90-2 OS=Arabidopsis thaliana GN=HSP90-2 PE=1 SV=1 - [HS902_ARATH]	498.17	45.78	3	2	36	74	699	80	5.05	1.015	1.125	1.069	0.878	1.015	0.89	0.927667	1.06967	0.867248	0.0585174
Q9S7Y7	Alpha-xylosidase 1 OS=Arabidopsis thaliana GN=XYL1 PE=1 SV=1 - [XYL1_ARATH]	497.66	34.32	5	28	29	73	915	102.3	6.77	0.972	1.004	1.015	0.994	1.039	0.967	1	0.997	1.00301	0.908981
Q9C7N3	Oil body-associated protein 2C OS=Arabidopsis thaliana GN=OBAP2C PE=1 SV=1 - [OBP2C_ARATH]	493.31	69.62	1	12	13	42	237	26.9	6.44	1.107	1.118	1.103	0.857	0.891	0.825	0.857667	1.10933	0.773137	0.000211072
Q9LDZ0	Heat shock 70 kDa protein 10, mitochondrial OS=Arabidopsis thaliana GN=HSP70-10 PE=2 SV=1 - [HSP7J_ARATH]	490.36	48.39	2	24	31	70	682	72.9	5.78	1.031	1	1.062	0.941	0.967	0.975	0.961	1.031	0.932105	0.027458
O22666	UDP-arabinopyranose mutase 3 OS=Arabidopsis thaliana GN=RGP3 PE=1 SV=2 - [RGP3_ARATH]	482.87	49.45	1	7	16	65	362	41.3	5.6	0.959	1.025	0.987	1.015	1.073	0.991	1.02633	0.990333	1.03635	0.309491
Q9FLT0	100 kDa coactivator-like protein OS=Arabidopsis thaliana GN=Tudor2 PE=1 SV=1 - [Q9FLT0_ARATH]	482.02	46.19	3	25	39	76	985	107.7	6.55	1.001	1.038	0.972	0.978	1.009	1.005	0.997333	1.00367	0.99369	0.782362
Q9LZJ2	AT3g62730/F26K9_160 OS=Arabidopsis thaliana GN=F26K9_160 PE=2 SV=1 - [Q9LZJ2_ARATH]	481.62	35.96	1	8	10	38	317	34.7	5.4	0.941	0.945	0.922	1.107	1.133	1.085	1.10833	0.936	1.18412	0.000380003
Q9M042	Putative phosphatidylethanolamine-binding protein OS=Arabidopsis thaliana GN=T10O8_10 PE=2 SV=1 - [Q9M042_ARATH]	481.47	53.09	2	10	10	63	162	17.8	5.55	1.013	1.025	1.054	0.954	1.032	0.879	0.955	1.03067	0.926585	0.173974
P51818	Heat shock protein 90-3 OS=Arabidopsis thaliana GN=HSP90-3 PE=1 SV=2 - [HS903_ARATH]	481	45.64	4	2	36	75	699	80	5.05	1.106	1.072	1.141	0.913	0.912	0.845	0.89	1.10633	0.804459	0.0019735
Q9SRZ6	Cytosolic isocitrate dehydrogenase [NADP] OS=Arabidopsis thaliana GN=CICDH PE=2 SV=1 - [ICDHC_ARATH]	475.24	62.44	4	20	26	65	410	45.7	6.57	1.049	1.159	1.062	0.847	0.969	0.879	0.898333	1.09	0.824159	0.0190308
P49688	40S ribosomal protein S2-3 OS=Arabidopsis thaliana GN=RPS2C PE=1 SV=2 - [RS23_ARATH]	471.37	62.81	2	6	20	62	285	30.9	10.29	1.074	1.059	1.005	0.912	1.022	0.858	0.930667	1.046	0.889739	0.0934438
Q96292	Actin-2 OS=Arabidopsis thaliana GN=ACT2 PE=1 SV=1 - [ACT2_ARATH]	467.11	46.68	20	8	16	60	377	41.8	5.58	1.015	1.067	1.005	0.938	1.001	0.925	0.954667	1.029	0.927762	0.0704036
Q9ZST4	Nitrogen regulatory protein P-II homolog OS=Arabidopsis thaliana GN=GLB1 PE=1 SV=1 - [GLNB_ARATH]	466.31	44.9	1	10	10	51	196	21.3	9.06	1.017	1.06	1.083	0.981	0.941	0.939	0.953667	1.05333	0.90538	0.0136179
P54609	Cell division control protein 48 homolog A OS=Arabidopsis thaliana GN=CDC48A PE=1 SV=1 - [CD48A_ARATH]	464.43	37.95	2	5	25	62	809	89.3	5.25	1.008	1.01	1.08	0.909	0.895	0.988	0.930667	1.03267	0.901227	0.0525799
Q9XEX2	Peroxiredoxin-2B OS=Arabidopsis thaliana GN=PRXIIB PE=1 SV=1 - [PRX2B_ARATH]	464.22	81.48	5	10	10	50	162	17.4	5.36	1.072	1.024	1.089	0.891	0.982	0.893	0.922	1.06167	0.868446	0.0174651
Q9SJ17	At2g21820 OS=Arabidopsis thaliana GN=At2g21820 PE=2 SV=1 - [Q9SJ17_ARATH]	462.06	75.64	1	9	9	42	78	8	4.81	0.639	0.631	0.63	1.43	1.595	1.372	1.46567	0.633333	2.31421	0.000239423
Q0WLB5	Clathrin heavy chain 2 OS=Arabidopsis thaliana GN=CHC2 PE=1 SV=1 - [CLAH2_ARATH]	462.02	29.83	3	9	43	69	1703	193.1	5.38	1.007	1.04	0.985	0.991	0.966	0.993	0.983333	1.01067	0.972955	0.207355
Q39133	Major latex protein type3 OS=Arabidopsis thaliana GN=MLP3 PE=2 SV=1 - [Q39133_ARATH]	460.43	66.45	5	10	13	116	155	17.9	7.15	0.771	0.77	0.818	1.259	1.305	1.227	1.26367	0.786333	1.60704	6.5846e-05
P25857	Glyceraldehyde-3-phosphate dehydrogenase GAPB, chloroplastic OS=Arabidopsis thaliana GN=GAPB PE=1 SV=2 - [G3PB_ARATH]	459.16	48.77	1	16	19	68	447	47.6	6.8	1.05	1.105	1.111	0.841	0.881	0.872	0.864667	1.08867	0.794244	0.000610186
Q9FL43	At5g07030 OS=Arabidopsis thaliana GN=At5g07030 PE=2 SV=1 - [Q9FL43_ARATH]	458.41	44.87	2	16	16	58	439	46.9	9.61	1.02	1.039	1.035	0.963	1.044	0.93	0.979	1.03133	0.949257	0.202378
Q9FNE2	Glutaredoxin-C2 OS=Arabidopsis thaliana GN=GRXC2 PE=2 SV=1 - [GRXC2_ARATH]	456.5	85.59	2	8	8	21	111	11.7	7.24	0.744	0.762	0.755	1.281	1.442	1.191	1.30467	0.753667	1.73109	0.00170285
Q8H0S9	Puromycin-sensitive aminopeptidase OS=Arabidopsis thaliana GN=MPA1 PE=2 SV=1 - [PSA_ARATH]	453.38	46.32	5	29	29	54	883	99.1	5.67	0.943	0.98	0.961	1.019	1.067	1.029	1.03833	0.961333	1.0801	0.0131336
O04983	Biotin carboxylase, chloroplastic OS=Arabidopsis thaliana GN=CAC2 PE=1 SV=1 - [ACCC_ARATH]	446.98	46.93	3	20	20	50	537	58.3	7.25	1.06	1.121	1.095	0.875	0.879	0.896	0.883333	1.092	0.808913	0.000375521
Q9M1J6	Protein STRICTOSIDINE SYNTHASE-LIKE 9 OS=Arabidopsis thaliana GN=SSL9 PE=2 SV=1 - [SSL9_ARATH]	445.9	41.62	1	14	14	40	370	41.4	7.01	1.022	1.113	1.051	0.937	0.954	0.938	0.943	1.062	0.887947	0.0122209
Q9LDA7	Probable protein phosphatase 2C 39 OS=Arabidopsis thaliana GN=At3g15260 PE=2 SV=1 - [P2C39_ARATH]	445.21	49.83	5	14	14	43	289	31.6	5.81	1.083	1.083	1.109	0.839	0.963	0.826	0.876	1.09167	0.802443	0.0083698
P36397	ADP-ribosylation factor 1 OS=Arabidopsis thaliana GN=ARF1 PE=1 SV=2 - [ARF1_ARATH]	445.04	58.56	7	9	9	36	181	20.6	6.95	1.018	1.137	1.042	0.931	0.982	0.924	0.945667	1.06567	0.887394	0.0419517
Q9MA93	Glucose and ribitol dehydrogenase homolog 2 OS=Arabidopsis thaliana GN=At3g05260 PE=2 SV=1 - [GRDH2_ARATH]	443.48	71.97	1	17	17	59	289	31.4	6.52	1.038	1.131	1.086	0.907	0.945	0.881	0.911	1.085	0.839631	0.00597139
Q9LTX9	Heat shock 70 kDa protein 7, chloroplastic OS=Arabidopsis thaliana GN=HSP70-7 PE=2 SV=1 - [HSP7G_ARATH]	442.14	36.21	1	7	24	73	718	76.9	5.3	1.1	1.121	1.103	0.875	0.85	0.866	0.863667	1.108	0.779483	1.54922e-05
Q9SRG3	Protein disulfide isomerase-like 1-2 OS=Arabidopsis thaliana GN=PDIL1-2 PE=2 SV=1 - [PDI12_ARATH]	441.53	53.15	2	21	28	76	508	56.3	5	1.062	1.116	1.111	0.887	0.957	0.842	0.895333	1.09633	0.816662	0.00592093
P40941	ADP,ATP carrier protein 2, mitochondrial OS=Arabidopsis thaliana GN=AAC2 PE=2 SV=2 - [ADT2_ARATH]	439.65	26.49	1	2	11	44	385	41.7	9.79	0.993	0.944	1.057	0.993	1.016	1.044	1.01767	0.998	1.01971	0.612814
Q8H0X6	Cysteine proteinase inhibitor 6 OS=Arabidopsis thaliana GN=CYS6 PE=1 SV=2 - [CYT6_ARATH]	435.75	61.54	2	15	15	77	234	26.3	6.27	0.876	0.899	0.895	1.117	1.304	1.074	1.165	0.89	1.30899	0.0179069
O49447	ADP,ATP carrier protein 3, mitochondrial OS=Arabidopsis thaliana GN=AAC3 PE=2 SV=1 - [ADT3_ARATH]	433.42	26.65	1	3	10	40	379	40.7	9.77	1.146	1.169	1.11	0.903	0.863	0.745	0.837	1.14167	0.733139	0.00378844
Q9FKK7	Xylose isomerase OS=Arabidopsis thaliana GN=XYLA PE=2 SV=2 - [XYLA_ARATH]	433.04	55.97	6	26	26	72	477	53.7	5.87	0.995	1.087	0.991	0.959	0.994	0.949	0.967333	1.02433	0.944354	0.170849
P46286	60S ribosomal protein L8-1 OS=Arabidopsis thaliana GN=RPL8A PE=1 SV=2 - [RL81_ARATH]	426.23	50.78	4	3	14	41	258	27.8	10.9	1.045	0.98	1.07	0.997	0.998	0.898	0.964333	1.03167	0.934733	0.18959
O03042	Ribulose bisphosphate carboxylase large chain OS=Arabidopsis thaliana GN=rbcL PE=1 SV=1 - [RBL_ARATH]	426.05	55.32	13	2	28	84	479	52.9	6.29	1.243	1.202	1.264	0.725	0.75	0.641	0.705333	1.23633	0.570504	0.000146838
O22832	Stearoyl-[acyl-carrier-protein] 9-desaturase 7, chloroplastic OS=Arabidopsis thaliana GN=FAB2 PE=1 SV=1 - [STAD7_ARATH]	424.43	49.63	6	12	17	36	401	45.7	6.48	1.041	1.058	1.018	0.99	0.928	0.972	0.963333	1.039	0.927174	0.0254091
A0A075M556	Ribulose 1,5-bisphosphate carboxylase/oxygenase large subunit (Fragment) OS=Arabidopsis thaliana GN=rbcL PE=3 SV=1 - [A0A075M556_ARATH]	422.96	55.7	10	1	27	77	465	51.3	6.38	0.974	0.915	0.981	0.873	1.009	1.31	1.064	0.956667	1.1122	0.457963
Q9SL09	Glycine-rich protein OS=Arabidopsis thaliana GN=At2g05580 PE=4 SV=1 - [Q9SL09_ARATH]	419.77	57.28	2	8	8	50	302	26	9.91	0.561	0.623	0.615	1.402	1.77	1.328	1.5	0.599667	2.50139	0.00285506
Q9FG31	Late embryogenesis abundant protein 4-5 OS=Arabidopsis thaliana GN=LEA4-5 PE=2 SV=1 - [Q9FG31_ARATH]	418.15	46.2	3	7	7	60	158	16.2	9.44	0.606	0.613	0.646	1.458	1.577	1.406	1.48033	0.621667	2.38123	7.93138e-05
Q38900	Peptidyl-prolyl cis-trans isomerase CYP19-1 OS=Arabidopsis thaliana GN=CYP19-1 PE=1 SV=1 - [CP19A_ARATH]	415.38	60.12	2	6	8	34	173	18.5	8.43	0.759	0.87	0.79	1.203	1.252	1.24	1.23167	0.806333	1.52749	0.00030038
Q9CAV0	40S ribosomal protein S3a-1 OS=Arabidopsis thaliana GN=RPS3AA PE=1 SV=3 - [RS3A1_ARATH]	414.1	60.31	3	7	15	52	262	29.8	9.76	0.944	0.984	0.954	1.069	1.094	1.029	1.064	0.960667	1.10756	0.00996747
Q9M5K2	Dihydrolipoyl dehydrogenase 2, mitochondrial OS=Arabidopsis thaliana GN=LPD2 PE=1 SV=1 - [DLDH2_ARATH]	414.04	48.13	1	12	19	44	507	54	7.03	1.01	1.01	1.034	0.97	1.023	0.907	0.966667	1.018	0.949574	0.210656
P46645	Aspartate aminotransferase, cytoplasmic isozyme 1 OS=Arabidopsis thaliana GN=ASP2 PE=1 SV=2 - [AAT2_ARATH]	413.04	77.78	5	20	25	54	405	44.2	7.28	0.876	0.896	0.926	1.122	1.134	1.144	1.13333	0.899333	1.26019	0.000122849
Q9T043	60S ribosomal protein L14-2 OS=Arabidopsis thaliana GN=RPL14B PE=2 SV=1 - [RL142_ARATH]	412.14	63.43	1	6	12	35	134	15.5	10.04	1.08	1.147	1.126	0.837	0.951	0.83	0.872667	1.11767	0.780793	0.00506551
Q6NKU0	At4g36600 OS=Arabidopsis thaliana GN=At4g36600 PE=2 SV=1 - [Q6NKU0_ARATH]	411.77	56.57	3	19	21	69	350	37.6	5.5	0.725	0.757	0.742	1.29	1.46	1.242	1.33067	0.741333	1.79496	0.000909782
O24456	Receptor for activated C kinase 1A OS=Arabidopsis thaliana GN=RACK1A PE=1 SV=2 - [GBLPA_ARATH]	410.98	66.36	1	13	19	54	327	35.7	7.71	0.964	1.017	0.963	1.019	1.134	1.016	1.05633	0.981333	1.07643	0.154166
Q39172	NADP-dependent alkenal double bond reductase P1 OS=Arabidopsis thaliana GN=P1 PE=1 SV=1 - [P1_ARATH]	407.15	51.01	16	6	12	31	345	38.1	6.18	1.013	1.071	0.996	0.967	1.003	0.948	0.972667	1.02667	0.947403	0.124514
Q9FF39	Bifunctional inhibitor/lipid-transfer protein/seed storage 2S albumin-like protein OS=Arabidopsis thaliana GN=At5g38170 PE=2 SV=1 - [Q9FF39_ARATH]	404.9	38.83	1	6	6	66	103	10.9	7.87	0.888	0.848	1.008	1.158	1.047	1.057	1.08733	0.914667	1.18878	0.0445316
Q9C9P4	3-oxoacyl-[acyl-carrier-protein] synthase II, chloroplastic OS=Arabidopsis thaliana GN=KAS2 PE=1 SV=1 - [KASC2_ARATH]	404.12	23.84	2	10	10	27	541	57.6	7.87	1.104	1.096	1.104	0.848	0.871	0.901	0.873333	1.10133	0.792978	0.000126661
P49209	60S ribosomal protein L9-1 OS=Arabidopsis thaliana GN=RPL9B PE=1 SV=3 - [RL91_ARATH]	403.88	69.59	5	13	13	36	194	22	9.45	1.038	1.138	1.066	0.924	0.942	0.864	0.91	1.08067	0.842073	0.010884
Q8L8Y0	40S ribosomal protein S2-1 OS=Arabidopsis thaliana GN=RPS2A PE=2 SV=2 - [RS21_ARATH]	401.57	58.1	5	5	19	54	284	30.7	10.26	0.954	1.139	1.019	0.987	1.02	0.801	0.936	1.03733	0.902314	0.30924
O23029	AWPM-19-like family protein OS=Arabidopsis thaliana GN=T1G11.19 PE=2 SV=1 - [O23029_ARATH]	401.52	25.81	1	4	4	41	186	19.8	9.72	0.957	1.189	1.032	0.909	0.935	0.923	0.922333	1.05933	0.870673	0.117141
Q9T0G0	11-beta-hydroxysteroid dehydrogenase-like 5 OS=Arabidopsis thaliana GN=HSD5 PE=2 SV=1 - [HSD5_ARATH]	399.92	48.33	1	18	18	52	389	43.4	6.89	0.968	1.055	0.982	1.019	1.079	0.985	1.02767	1.00167	1.02596	0.536536
Q9LV33	Beta-glucosidase 44 OS=Arabidopsis thaliana GN=BGLU44 PE=2 SV=1 - [BGL44_ARATH]	399.27	42.19	21	22	23	64	512	58.9	9.42	1.078	1.143	1.123	0.847	0.909	0.855	0.870333	1.11467	0.780801	0.00086938
P47999	Cysteine synthase, chloroplastic/chromoplastic OS=Arabidopsis thaliana GN=OASB PE=1 SV=2 - [CYSKP_ARATH]	398.21	51.79	6	13	16	34	392	41.6	8.02	1.024	0.992	1.094	0.978	0.938	0.976	0.964	1.03667	0.929904	0.0911353
O23654	V-type proton ATPase catalytic subunit A OS=Arabidopsis thaliana GN=VHA-A PE=1 SV=1 - [VATA_ARATH]	394.11	49.6	5	24	24	42	623	68.8	5.24	1.003	1.006	0.987	1.018	1.02	0.989	1.009	0.998667	1.01035	0.424242
Q42112	60S acidic ribosomal protein P0-2 OS=Arabidopsis thaliana GN=RPP0B PE=1 SV=2 - [RLA02_ARATH]	393.75	39.38	6	9	9	24	320	34.1	5.07	1.062	1.143	1.104	0.89	0.962	0.823	0.891667	1.103	0.808401	0.0104215
F4J5V2	Universal stress protein family protein OS=Arabidopsis thaliana GN=At3g58450 PE=1 SV=1 - [F4J5V2_ARATH]	393.47	64.97	5	11	11	35	197	21.7	6.54	0.977	1.08	1.021	0.948	1.037	0.957	0.980667	1.026	0.955815	0.332079
Q8W4G8	Fructose-bisphosphate aldolase OS=Arabidopsis thaliana GN=F17C15.11 PE=2 SV=1 - [Q8W4G8_ARATH]	392.56	22.84	5	1	7	34	359	38.6	8.02	1.063	0.917	1.03	1.067	0.998	0.974	1.013	1.00333	1.00963	0.862251
O23018	Glycine-rich protein OS=Arabidopsis thaliana GN=T1G11.8 PE=2 SV=1 - [O23018_ARATH]	392.36	23.58	2	2	2	9	212	18.3	8.68	0.692	0.708	0.737	1.317	1.424	1.32	1.35367	0.712333	1.90033	6.90136e-05
F4IW47	Transketolase-2, chloroplastic OS=Arabidopsis thaliana GN=TKL-2 PE=1 SV=1 - [TKTC2_ARATH]	389.41	40.76	2	15	24	55	741	79.9	6.58	1.003	1.024	1.043	0.996	1.034	0.925	0.985	1.02333	0.962541	0.322195
Q0WNJ6	Clathrin heavy chain 1 OS=Arabidopsis thaliana GN=CHC1 PE=1 SV=1 - [CLAH1_ARATH]	386.88	26.57	3	5	39	63	1705	193.1	5.4	0.922	0.905	0.962	1.115	1.096	1.088	1.09967	0.929667	1.18286	0.000811251
O04907	Nitrilase 2 OS=Arabidopsis thaliana GN=nit2 PE=4 SV=2 - [O04907_ARATH]	383.66	38.64	2	7	13	32	339	37.2	5.55	1.024	1.01	1.004	0.973	0.987	0.995	0.985	1.01267	0.972679	0.0340418
F4IVR2	Heat shock protein 60-2 OS=Arabidopsis thaliana GN=HSP60-2 PE=3 SV=1 - [F4IVR2_ARATH]	383.01	38.28	2	7	21	49	580	61.4	6.33	0.907	0.884	0.935	1.156	1.171	1.013	1.11333	0.908667	1.22524	0.0175297
Q8RUC6	Ubiquitin-NEDD8-like protein RUB2 OS=Arabidopsis thaliana GN=RUB2 PE=1 SV=3 - [RUB2_ARATH]	382.25	61.04	43	3	11	104	154	17.1	6.06	0.72	0.825	0.845	1.223	1.284	1.277	1.26133	0.796667	1.58326	0.000427075
O82514	Adenylate kinase 4 OS=Arabidopsis thaliana GN=ADK1 PE=1 SV=2 - [KAD4_ARATH]	382.13	58.54	3	11	15	42	246	26.9	7.36	0.709	0.735	0.744	1.279	1.476	1.232	1.329	0.729333	1.82221	0.00135891
Q8GXW5	Glutamine synthetase cytosolic isozyme 1-5 OS=Arabidopsis thaliana GN=GLN1-5 PE=1 SV=1 - [GLN15_ARATH]	381.36	54.39	4	13	16	43	353	38.9	6.65	1.052	1.115	1.092	0.878	0.982	0.853	0.904333	1.08633	0.832464	0.0139567
P51413	60S ribosomal protein L17-2 OS=Arabidopsis thaliana GN=RPL17B PE=2 SV=2 - [RL172_ARATH]	381.01	37.14	14	2	8	51	175	19.8	10.11	0.904	0.915	0.827	1.043	1.348	1.06	1.15033	0.882	1.30423	0.0593322
Q9LK36	Adenosylhomocysteinase 2 OS=Arabidopsis thaliana GN=SAHH2 PE=1 SV=1 - [SAHH2_ARATH]	380.87	42.27	1	1	16	38	485	53.1	5.74	1	0.955	0.98	0.963	0.947	1.213	1.041	0.978333	1.06405	0.511649
P59232	Ubiquitin-40S ribosomal protein S27a-2 OS=Arabidopsis thaliana GN=RPS27AB PE=1 SV=2 - [R27AB_ARATH]	379.44	64.33	43	3	11	113	157	17.8	9.8	1.047	1.064	1.086	0.934	0.961	0.877	0.924	1.06567	0.867063	0.00648847
Q93VI3	60S ribosomal protein L17-1 OS=Arabidopsis thaliana GN=RPL17A PE=2 SV=1 - [RL171_ARATH]	376.58	33.52	1	1	7	41	176	19.9	10.11	0.859	0.87	0.854	1.165	1.211	1.205	1.19367	0.861	1.38637	2.57329e-05
A6XI99	Ubiquitin (Fragment) OS=Arabidopsis thaliana GN=UBQ10 PE=2 SV=1 - [A6XI99_ARATH]	375.59	82.19	24	1	8	100	219	24.6	6.83	0.955	0.842	1.003	1.121	1.117	1.045	1.09433	0.933333	1.1725	0.0400879
P17745	Elongation factor Tu, chloroplastic OS=Arabidopsis thaliana GN=TUFA PE=1 SV=1 - [EFTU_ARATH]	375.37	27.1	3	9	11	27	476	51.6	6.19	1.046	1.095	1.053	0.914	0.969	0.947	0.943333	1.06467	0.886036	0.00538524
Q8S4Y1	Acetyl-CoA acetyltransferase, cytosolic 1 OS=Arabidopsis thaliana GN=AAT1 PE=2 SV=1 - [THIC1_ARATH]	374.22	28.29	1	8	8	25	403	41.4	6.89	1.078	1.117	1.11	0.897	0.912	0.864	0.891	1.10167	0.808775	0.000344747
Q9SCV9	Beta-galactosidase 3 OS=Arabidopsis thaliana GN=BGAL3 PE=1 SV=1 - [BGAL3_ARATH]	373.96	28.39	9	18	20	44	856	95.1	7.21	1.068	1.049	1.049	0.934	0.939	0.895	0.922667	1.05533	0.874289	0.00096919
P57106	Malate dehydrogenase, cytoplasmic 2 OS=Arabidopsis thaliana GN=MDH2 PE=1 SV=1 - [MDHC2_ARATH]	373.24	37.05	9	2	13	40	332	35.7	6.79	0.833	0.871	0.7	1.225	1.389	1.184	1.266	0.801333	1.57987	0.00463601
Q9SIM4	60S ribosomal protein L14-1 OS=Arabidopsis thaliana GN=RPL14A PE=2 SV=1 - [RL141_ARATH]	372.24	47.76	1	2	8	23	134	15.5	10.13	0.998	1.013	0.934	1.034	1.071	1.031	1.04533	0.981667	1.06486	0.0810174
P47998	Cysteine synthase 1 OS=Arabidopsis thaliana GN=OASA1 PE=1 SV=2 - [CYSK1_ARATH]	371.76	57.76	5	14	16	55	322	33.8	6.14	1.024	1.017	1.046	1.02	1.008	0.945	0.991	1.029	0.963071	0.200899
Q9SA73	Obg-like ATPase 1 OS=Arabidopsis thaliana GN=YchF1 PE=1 SV=1 - [OLA1_ARATH]	371.28	51.02	1	17	17	36	394	44.4	6.81	1.002	1.093	1.087	0.914	0.972	0.914	0.933333	1.06067	0.87995	0.0223556
P11574	V-type proton ATPase subunit B1 OS=Arabidopsis thaliana GN=VHA-B1 PE=2 SV=2 - [VATB1_ARATH]	369.74	45.68	6	3	17	42	486	54.1	5.1	1.017	1.033	1.097	1.05	0.964	0.923	0.979	1.049	0.93327	0.192371
Q8W112	Beta-D-glucan exohydrolase-like protein OS=Arabidopsis thaliana GN=At5g20950 PE=2 SV=1 - [Q8W112_ARATH]	369.22	29.81	19	15	17	52	624	67.9	9.13	1.069	1.133	1.115	0.911	0.898	0.843	0.884	1.10567	0.799518	0.00142287
Q9M339	40S ribosomal protein S3-2 OS=Arabidopsis thaliana GN=RPS3B PE=1 SV=1 - [RS32_ARATH]	369.12	64.66	1	3	19	51	249	27.3	9.54	0.971	1.033	0.942	0.958	1.125	0.965	1.016	0.982	1.03462	0.605754
Q683B7	Prolyl carboxypeptidase like protein (Fragment) OS=Arabidopsis thaliana GN=At4g36195 PE=2 SV=1 - [Q683B7_ARATH]	367.38	40.69	8	16	17	57	462	52.1	6.52	1.033	1.035	1.034	0.95	0.957	0.934	0.947	1.034	0.915861	0.000219
Q9FM65	Fasciclin-like arabinogalactan protein 1 OS=Arabidopsis thaliana GN=FLA1 PE=1 SV=1 - [FLA1_ARATH]	365.55	18.87	1	5	5	18	424	44.8	6.74	0.934	0.865	0.912	1.124	1.147	1.1	1.12367	0.903667	1.24345	0.000845709
Q9SQI8	Dihydrolipoyllysine-residue acetyltransferase component 4 of pyruvate dehydrogenase complex, chloroplastic OS=Arabidopsis thaliana GN=LTA2 PE=2 SV=1 - [ODP24_ARATH]	365.29	35.63	2	11	13	42	480	50	8.37	1.082	1.061	1.089	0.861	0.918	0.929	0.902667	1.07733	0.837871	0.00153246
P42730	Chaperone protein ClpB1 OS=Arabidopsis thaliana GN=CLPB1 PE=1 SV=2 - [CLPB1_ARATH]	365.16	40.07	4	28	30	45	911	101.2	6.13	1.041	1.039	0.994	0.944	0.933	0.939	0.938667	1.02467	0.91607	0.00536986
P20115	Citrate synthase 4, mitochondrial OS=Arabidopsis thaliana GN=CSY4 PE=1 SV=3 - [CISY4_ARATH]	363.8	47.47	2	17	17	35	474	52.7	6.89	1.069	1.116	1.114	0.898	0.927	0.84	0.888333	1.09967	0.807821	0.00209436
P29402	Calnexin homolog 1 OS=Arabidopsis thaliana GN=CNX1 PE=1 SV=1 - [CALX1_ARATH]	363.42	40.75	3	20	20	44	530	60.4	4.91	1.024	1.161	1.089	0.897	0.925	0.853	0.891667	1.09133	0.817043	0.0111637
Q9FI56	Chaperone protein ClpC1, chloroplastic OS=Arabidopsis thaliana GN=CLPC1 PE=1 SV=1 - [CLPC1_ARATH]	361.14	38.97	9	34	35	63	929	103.4	6.77	1.02	1.077	1.007	0.931	0.997	0.943	0.957	1.03467	0.924936	0.0583726
Q9FE54	At1g16880 OS=Arabidopsis thaliana GN=F6I1.15 PE=2 SV=1 - [Q9FE54_ARATH]	361.01	52.63	1	7	7	24	152	16.7	6.58	0.867	0.872	0.854	1.194	1.185	1.135	1.17133	0.864333	1.35519	8.79746e-05
B9DG17	40S ribosomal protein SA OS=Arabidopsis thaliana GN=P40 PE=1 SV=1 - [B9DG17_ARATH]	358.2	41.16	4	12	12	39	294	32	5.15	1.037	1.105	1.02	0.934	0.952	0.903	0.929667	1.054	0.882037	0.0137688
P30184	Leucine aminopeptidase 1 OS=Arabidopsis thaliana GN=PM25 PE=1 SV=1 - [AMPL1_ARATH]	356.41	47.31	4	11	19	36	520	54.5	5.92	0.992	1.042	1.03	0.944	1.05	0.952	0.982	1.02133	0.961488	0.350692
Q9SIP7	40S ribosomal protein S3-1 OS=Arabidopsis thaliana GN=RPS3A PE=1 SV=1 - [RS31_ARATH]	356.37	65.2	1	2	19	54	250	27.5	9.54	0.985	1.097	0.985	0.981	1.068	0.874	0.974333	1.02233	0.953049	0.51563
P32961	Nitrilase 1 OS=Arabidopsis thaliana GN=NIT1 PE=1 SV=2 - [NRL1_ARATH]	355.42	37.57	4	5	11	35	346	38.1	6.28	1.004	1.071	1.007	0.967	1.075	0.937	0.993	1.02733	0.96658	0.507773
P92549	ATP synthase subunit alpha, mitochondrial OS=Arabidopsis thaliana GN=ATPA PE=1 SV=2 - [ATPAM_ARATH]	354.77	46.15	2	19	20	61	507	55	6.61	1.013	1.065	1.047	0.955	0.98	0.932	0.955667	1.04167	0.91744	0.0139882
P06525	Alcohol dehydrogenase class-P OS=Arabidopsis thaliana GN=ADH1 PE=1 SV=2 - [ADH1_ARATH]	354.49	60.16	1	17	18	52	379	41.2	6.24	0.928	0.977	0.983	1.033	1.12	1.008	1.05367	0.962667	1.09453	0.0755598
P42645	14-3-3-like protein GF14 upsilon OS=Arabidopsis thaliana GN=GRF5 PE=1 SV=2 - [14335_ARATH]	354.16	65.67	2	4	17	47	268	30.2	4.81	0.961	0.991	0.921	0.988	1.064	1.009	1.02033	0.957667	1.06544	0.108334
Q43314	Glutamate dehydrogenase 1 OS=Arabidopsis thaliana GN=GDH1 PE=2 SV=1 - [DHE1_ARATH]	352.02	47.2	3	11	16	45	411	44.5	6.86	1.068	1.072	1.078	0.918	0.944	0.84	0.900667	1.07267	0.839652	0.00539618
P49691	60S ribosomal protein L4-2 OS=Arabidopsis thaliana GN=RPL4D PE=2 SV=2 - [RL4B_ARATH]	347.69	49.14	4	7	20	54	407	44.7	10.3	1.023	1.113	1.055	0.955	1.034	0.892	0.960333	1.06367	0.902852	0.101618
Q9SMT7	Oxalate--CoA ligase OS=Arabidopsis thaliana GN=AAE3 PE=1 SV=1 - [4CLLA_ARATH]	347	40.66	1	19	19	47	514	55.5	6.54	0.962	0.982	1.013	1.023	1.109	0.968	1.03333	0.985667	1.04836	0.33599
Q9FLN9	Peroxygenase 2 OS=Arabidopsis thaliana GN=PXG2 PE=1 SV=1 - [PXG2_ARATH]	346	43.62	1	9	11	56	243	27.9	5.97	0.997	1.052	1.016	1.015	1.042	0.905	0.987333	1.02167	0.966395	0.487047
Q3E902	40S ribosomal protein S21-2 OS=Arabidopsis thaliana GN=RPS21C PE=1 SV=2 - [RS212_ARATH]	344.32	18.29	1	1	1	5	82	9.1	8	NA	NA	NA	NA	NA	NA	NA	NA	NA	NA
Q9C8P0	Dihydrolipoyllysine-residue acetyltransferase component 5 of pyruvate dehydrogenase complex, chloroplastic OS=Arabidopsis thaliana GN=EMB3003 PE=2 SV=1 - [ODP25_ARATH]	343.15	46.02	1	14	16	41	465	48.3	8.78	1.042	1.07	1.105	0.922	0.936	0.877	0.911667	1.07233	0.850171	0.00323073
Q9SCN8	Cell division control protein 48 homolog D OS=Arabidopsis thaliana GN=CDC48D PE=1 SV=1 - [CD48D_ARATH]	342.68	35.95	2	4	24	57	815	90.3	5.16	1.08	1.032	1.025	0.979	1.015	1.003	0.999	1.04567	0.955371	0.0827095
Q42064	60S ribosomal protein L8-3 OS=Arabidopsis thaliana GN=RPL8C PE=1 SV=2 - [RL83_ARATH]	339.38	43.41	4	2	13	36	258	27.9	10.83	0.842	0.935	0.92	1.037	1.127	1.208	1.124	0.899	1.25028	0.0170359
Q94BT9	Copper transport protein ATX1 OS=Arabidopsis thaliana GN=ATX1 PE=1 SV=2 - [ATOX1_ARATH]	334.58	77.63	1	6	6	17	76	8.2	7.96	0.991	1.012	1.028	0.984	1.018	0.964	0.988667	1.01033	0.978555	0.319082
Q8VZU3	Serine carboxypeptidase-like 19 OS=Arabidopsis thaliana GN=SCPL19 PE=1 SV=1 - [SCP19_ARATH]	333.8	39.14	13	12	12	33	465	52.5	6.54	1.059	1.123	1.093	0.903	0.95	0.895	0.916	1.09167	0.839084	0.00223365
Q9M5K3	Dihydrolipoyl dehydrogenase 1, mitochondrial OS=Arabidopsis thaliana GN=LPD1 PE=1 SV=2 - [DLDH1_ARATH]	332.78	36.88	2	8	15	33	507	54	7.4	0.99	1.055	1.046	0.968	1.033	0.896	0.965667	1.03033	0.937237	0.219704
Q2V3Q0	20S proteasome alpha subunit PAD1 OS=Arabidopsis thaliana GN=PAD1 PE=4 SV=1 - [Q2V3Q0_ARATH]	332.68	28.81	2	1	6	23	243	26.6	7.37	1.063	1.082	1.019	0.875	0.935	1.042	0.950667	1.05467	0.901391	0.117564
F4I9U2	Uncharacterized protein OS=Arabidopsis thaliana GN=At1g65090 PE=4 SV=1 - [F4I9U2_ARATH]	332.53	32.64	8	9	9	24	288	31.8	4.64	1.072	1.118	1.085	0.891	0.974	0.797	0.887333	1.09167	0.812824	0.0181401
Q93VG5	40S ribosomal protein S8-1 OS=Arabidopsis thaliana GN=RPS8A PE=2 SV=1 - [RS81_ARATH]	329.31	50	3	9	9	26	222	25	10.32	0.954	1.042	1.024	1.024	1.014	0.967	1.00167	1.00667	0.995033	0.883698
Q8LA93	60S ribosomal protein L4-B (L1) OS=Arabidopsis thaliana PE=2 SV=1 - [Q8LA93_ARATH]	328.72	48.52	5	9	22	54	406	44.6	10.3	1.01	1.046	1.036	0.967	1.053	0.95	0.99	1.03067	0.960543	0.293242
Q94AR8	3-isopropylmalate dehydratase large subunit OS=Arabidopsis thaliana GN=IIL1 PE=1 SV=1 - [LEUC_ARATH]	328.53	31.83	4	12	12	30	509	55	7.84	1.075	1.047	1.034	0.934	0.953	0.948	0.945	1.052	0.898289	0.00132075
P33207	3-oxoacyl-[acyl-carrier-protein] reductase, chloroplastic OS=Arabidopsis thaliana GN=At1g24360 PE=1 SV=2 - [FABG_ARATH]	327.28	40.75	1	11	11	37	319	33.5	9.41	1.075	1.157	1.103	0.888	0.865	0.843	0.865333	1.11167	0.778411	0.000841133
P51427	40S ribosomal protein S5-2 OS=Arabidopsis thaliana GN=RPS5B PE=1 SV=2 - [RS52_ARATH]	327.25	56.04	1	2	11	32	207	22.9	9.63	1.125	1.151	0.932	0.78	0.923	0.803	0.835333	1.06933	0.781172	0.0463523
Q3E8H9	Late embryogenesis abundant protein family protein OS=Arabidopsis thaliana GN=At5g44310 PE=4 SV=1 - [Q3E8H9_ARATH]	325	66.1	4	29	29	99	295	33.3	5.54	0.717	0.747	0.749	1.293	1.529	1.204	1.342	0.737667	1.81925	0.00344741
Q9C522	ATP-citrate synthase beta chain protein 1 OS=Arabidopsis thaliana GN=ACLB-1 PE=2 SV=1 - [ACLB1_ARATH]	324.96	43.42	4	6	22	42	608	65.8	7.81	1.054	1.029	1.083	0.879	0.982	0.92	0.927	1.05533	0.878395	0.0190827
O81149	Proteasome subunit alpha type-5-A OS=Arabidopsis thaliana GN=PAE1 PE=1 SV=1 - [PSA5A_ARATH]	324.09	51.05	1	1	10	20	237	25.9	4.75	1.149	1.168	1.16	0.807	0.935	0.73	0.824	1.159	0.710958	0.00505814
P21238	Chaperonin 60 subunit alpha 1, chloroplastic OS=Arabidopsis thaliana GN=CPN60A1 PE=1 SV=2 - [CPNA1_ARATH]	322.68	31.06	1	14	15	31	586	62	5.19	1.039	1.06	1.064	0.93	0.922	0.961	0.937667	1.05433	0.889346	0.00119523
O81235	Superoxide dismutase [Mn] 1, mitochondrial OS=Arabidopsis thaliana GN=MSD1 PE=1 SV=2 - [SODM1_ARATH]	321.44	59.74	3	11	11	41	231	25.4	8.48	0.901	0.983	0.918	1.112	1.143	1.055	1.10333	0.934	1.1813	0.00918872
Q9SLF7	60S acidic ribosomal protein P2-2 OS=Arabidopsis thaliana GN=RPP2B PE=1 SV=1 - [RLA22_ARATH]	320.54	64.35	3	3	5	20	115	11.4	4.68	0.971	1.018	1.003	1.045	1.102	0.934	1.027	0.997333	1.02975	0.593616
Q96300	14-3-3-like protein GF14 nu OS=Arabidopsis thaliana GN=GRF7 PE=1 SV=1 - [14337_ARATH]	319.84	51.32	1	1	14	43	265	29.8	4.82	0.976	0.927	0.977	0.997	1.126	1.08	1.06767	0.96	1.11215	0.0592006
Q9FJA6	40S ribosomal protein S3-3 OS=Arabidopsis thaliana GN=RPS3C PE=1 SV=1 - [RS33_ARATH]	319.59	66.53	2	3	18	45	248	27.4	9.54	0.959	1.096	1.03	0.976	0.994	0.976	0.982	1.02833	0.954943	0.311278
Q9ZSK4	Actin-depolymerizing factor 3 OS=Arabidopsis thaliana GN=ADF3 PE=1 SV=1 - [ADF3_ARATH]	318.74	58.99	11	4	7	24	139	15.9	6.34	1.181	1.125	1.129	0.856	0.864	0.84	0.853333	1.145	0.745269	0.000113309
Q42262	40S ribosomal protein S3a-2 OS=Arabidopsis thaliana GN=RPS3AB PE=2 SV=3 - [RS3A2_ARATH]	318.56	57.25	5	7	15	50	262	29.8	9.74	0.915	1.006	0.901	1.069	1.026	1.079	1.058	0.940667	1.12473	0.0330253
P60040	60S ribosomal protein L7-2 OS=Arabidopsis thaliana GN=RPL7B PE=2 SV=1 - [RL72_ARATH]	316.59	68.6	4	12	21	57	242	28.2	9.94	0.989	1.073	0.978	0.992	1.024	0.92	0.978667	1.01333	0.965789	0.464977
Q940J8	Pectin acetylesterase 7 OS=Arabidopsis thaliana GN=PAE7 PE=2 SV=1 - [PAE7_ARATH]	316.3	36.32	2	8	11	27	391	42.1	9.11	1.011	1.082	1.065	0.948	0.957	0.919	0.941333	1.05267	0.894237	0.0101432
P57752	Acyl-CoA-binding domain-containing protein 6 OS=Arabidopsis thaliana GN=ACBP6 PE=1 SV=1 - [ACBP6_ARATH]	314.04	75	1	6	6	34	92	10.4	5.24	0.726	0.704	0.694	1.369	1.469	1.251	1.363	0.708	1.92514	0.000504716
Q93Z02	At1g19900/F6F9_4 OS=Arabidopsis thaliana GN=At1g19900 PE=2 SV=1 - [Q93Z02_ARATH]	314	35.95	2	16	16	52	548	61	8.78	1	1.017	1.024	1.016	1.028	1.015	1.01967	1.01367	1.00592	0.50781
Q9FWR4	Glutathione S-transferase DHAR1, mitochondrial OS=Arabidopsis thaliana GN=DHAR1 PE=1 SV=1 - [DHAR1_ARATH]	312.37	77.46	2	11	11	37	213	23.6	5.91	1.046	1.03	1.111	0.935	0.962	0.913	0.936667	1.06233	0.881707	0.0116547
O24616	Proteasome subunit alpha type-7-B OS=Arabidopsis thaliana GN=PAD2 PE=1 SV=2 - [PSA7B_ARATH]	311.22	33.2	1	2	7	20	250	27.3	8.63	0.974	1.119	1.037	1.054	0.965	0.891	0.97	1.04333	0.929712	0.309824
Q9LXQ2	At3g44100 OS=Arabidopsis thaliana GN=F26G5_50 PE=2 SV=1 - [Q9LXQ2_ARATH]	310.43	23.03	1	3	3	13	152	16.1	8.18	0.98	1.155	1.035	0.976	0.954	0.892	0.940667	1.05667	0.890221	0.113663
Q9ZU52	Probable fructose-bisphosphate aldolase 3, chloroplastic OS=Arabidopsis thaliana GN=FBA3 PE=1 SV=1 - [ALFC3_ARATH]	310.01	46.29	6	13	15	38	391	42.3	8.09	1.09	1.132	1.148	0.883	0.907	0.84	0.876667	1.12333	0.780415	0.000703075
P56757	ATP synthase subunit alpha, chloroplastic OS=Arabidopsis thaliana GN=atpA PE=1 SV=1 - [ATPA_ARATH]	309.24	34.12	4	14	15	39	507	55.3	5.25	1.079	1.08	1.044	0.896	0.917	0.932	0.915	1.06767	0.857009	0.000639193
Q9SN86	Malate dehydrogenase, chloroplastic OS=Arabidopsis thaliana GN=At3g47520 PE=1 SV=1 - [MDHP_ARATH]	309.2	37.22	9	10	13	41	403	42.4	8.51	1.095	0.992	1.04	1.004	0.97	0.976	0.983333	1.04233	0.943396	0.134797
Q9ZPI5	Peroxisomal fatty acid beta-oxidation multifunctional protein MFP2 OS=Arabidopsis thaliana GN=MFP2 PE=1 SV=1 - [MFP2_ARATH]	307.36	34.76	2	21	21	38	725	78.8	9.17	0.994	1.028	0.984	0.977	0.98	0.964	0.973667	1.002	0.971723	0.116612
Q9ZUT9	40S ribosomal protein S5-1 OS=Arabidopsis thaliana GN=RPS5A PE=1 SV=1 - [RS51_ARATH]	306.7	56.04	1	2	11	28	207	23	9.67	0.896	1.235	0.891	0.975	1.072	0.844	0.963667	1.00733	0.956651	0.756726
P21240	Chaperonin 60 subunit beta 1, chloroplastic OS=Arabidopsis thaliana GN=CPN60B1 PE=1 SV=3 - [CPNB1_ARATH]	305.09	38.5	10	10	20	33	600	63.8	6.51	1.001	1.113	1.018	0.941	0.962	0.941	0.948	1.044	0.908046	0.0540426
Q8L8T2	Glutaredoxin-C1 OS=Arabidopsis thaliana GN=GRXC1 PE=2 SV=2 - [GRXC1_ARATH]	303.38	46.4	1	6	6	16	125	13.6	5.48	1.002	1.149	1.075	0.916	0.97	0.864	0.916667	1.07533	0.852449	0.0386777
Q42134	Proteasome subunit alpha type-5-B OS=Arabidopsis thaliana GN=PAE2 PE=1 SV=2 - [PSA5B_ARATH]	303.11	52.32	1	1	10	20	237	26	4.75	0.97	0.973	1.095	0.978	1.015	1.022	1.005	1.01267	0.992429	0.868304
Q38907	Probable xyloglucan endotransglucosylase/hydrolase protein 25 OS=Arabidopsis thaliana GN=XTH25 PE=2 SV=2 - [XTH25_ARATH]	302.16	43.31	11	14	14	46	284	32.6	8.13	0.977	1.006	1.003	1.043	1.082	0.959	1.028	0.995333	1.03282	0.43218
Q9FGX1	ATP-citrate synthase beta chain protein 2 OS=Arabidopsis thaliana GN=ACLB-2 PE=1 SV=1 - [ACLB2_ARATH]	301.28	45.89	5	7	23	45	608	65.8	7.64	1.036	0.99	1.067	1.05	0.878	0.95	0.959333	1.031	0.930488	0.259995
O48646	Probable phospholipid hydroperoxide glutathione peroxidase 6, mitochondrial OS=Arabidopsis thaliana GN=GPX6 PE=2 SV=2 - [GPX6_ARATH]	300.22	45.69	1	9	10	39	232	25.6	9.35	0.796	0.804	0.844	1.202	1.397	1.149	1.24933	0.814667	1.53355	0.00481514
Q9FK35	Adenylate kinase 3 OS=Arabidopsis thaliana GN=ADK2 PE=1 SV=1 - [KAD3_ARATH]	299.93	53.63	1	10	13	31	248	27.3	7.37	0.749	0.753	0.79	1.252	1.396	1.21	1.286	0.764	1.68325	0.00083342
Q9ZRW8	Glutathione S-transferase U19 OS=Arabidopsis thaliana GN=GSTU19 PE=1 SV=1 - [GSTUJ_ARATH]	299.5	55.25	4	12	15	45	219	25.6	6.04	0.881	0.985	0.979	1.074	1.186	1.02	1.09333	0.948333	1.1529	0.071069
Q9S7C0	Heat shock 70 kDa protein 14 OS=Arabidopsis thaliana GN=HSP70-14 PE=2 SV=1 - [HSP7O_ARATH]	298.43	39.59	1	2	31	50	831	91.7	5.25	1.035	0.972	1.054	1.076	1.003	0.908	0.995667	1.02033	0.975825	0.674767
Q9S7I3	Non-specific lipid-transfer protein 2 OS=Arabidopsis thaliana GN=LTP2 PE=3 SV=1 - [NLTP2_ARATH]	298.14	44.07	1	5	6	64	118	11.9	8.97	0.747	0.714	0.745	1.328	1.287	1.335	1.31667	0.735333	1.79057	5.96984e-06
Q9FF52	60S ribosomal protein L12-3 OS=Arabidopsis thaliana GN=RPL12C PE=2 SV=1 - [RL123_ARATH]	297.27	48.8	1	1	7	26	166	17.8	8.92	1.099	0.926	1.012	1.008	0.967	1.029	1.00133	1.01233	0.989134	0.846166
Q9ZVL0	Glycoprotein membrane GPI-anchored OS=Arabidopsis thaliana GN=T22H22.25 PE=2 SV=1 - [Q9ZVL0_ARATH]	297.16	20	1	4	4	31	200	21.6	6.52	1.159	1.035	1.217	0.852	0.806	0.849	0.835667	1.137	0.734975	0.00565346
O48549	40S ribosomal protein S6-1 OS=Arabidopsis thaliana GN=RPS6A PE=1 SV=2 - [RS61_ARATH]	293.68	51.6	33	4	15	37	250	28.3	10.61	0.866	0.886	0.874	1.124	1.232	1.071	1.14233	0.875333	1.30503	0.00501062
P51430	40S ribosomal protein S6-2 OS=Arabidopsis thaliana GN=RPS6B PE=1 SV=3 - [RS62_ARATH]	293.68	51	32	5	15	39	249	28.1	10.83	0.879	0.952	0.974	1.111	1.215	0.984	1.10333	0.935	1.18004	0.0815522
Q94JQ4	Reactive Intermediate Deaminase A, chloroplastic OS=Arabidopsis thaliana GN=RIDA PE=1 SV=1 - [RIDA_ARATH]	291.42	61.5	1	11	11	26	187	19.8	8.4	0.871	0.831	0.869	1.103	1.183	1.144	1.14333	0.857	1.33411	0.000416755
O04331	Prohibitin-3, mitochondrial OS=Arabidopsis thaliana GN=PHB3 PE=1 SV=1 - [PHB3_ARATH]	291.24	53.43	2	6	10	19	277	30.4	7.64	0.893	1.034	0.986	1.07	1.044	0.969	1.02767	0.971	1.05836	0.331146
Q9STY6	40S ribosomal protein S20-2 OS=Arabidopsis thaliana GN=RPS20B PE=2 SV=1 - [RS202_ARATH]	288.3	40.98	8	1	5	20	122	13.7	9.72	0.84	0.832	0.935	1.191	1.335	1.02	1.182	0.869	1.36018	0.0319387
P42643	14-3-3-like protein GF14 chi OS=Arabidopsis thaliana GN=GRF1 PE=1 SV=3 - [14331_ARATH]	284.05	69.29	3	6	16	41	267	29.9	4.81	0.934	0.997	0.991	1.02	1.103	1.116	1.07967	0.974	1.10849	0.0431277
Q9SJ12	Probable ATP synthase 24 kDa subunit, mitochondrial OS=Arabidopsis thaliana GN=At2g21870 PE=1 SV=1 - [ATP7_ARATH]	283.27	50.83	2	13	13	29	240	27.6	6.67	0.839	0.864	0.895	1.163	1.235	1.124	1.174	0.866	1.35566	0.00106029
Q9ZPI6	Peroxisomal fatty acid beta-oxidation multifunctional protein AIM1 OS=Arabidopsis thaliana GN=AIM1 PE=1 SV=1 - [AIM1_ARATH]	282.57	27.88	3	17	18	36	721	77.8	9.32	1.013	1.046	1.015	0.97	0.968	0.906	0.948	1.02467	0.925179	0.0312864
F4JTN0	Patched family protein OS=Arabidopsis thaliana GN=At4g38350 PE=4 SV=1 - [F4JTN0_ARATH]	281.5	18.85	6	18	18	28	1273	139.9	5.35	1.059	1.003	1.045	0.946	0.961	0.884	0.930333	1.03567	0.898294	0.0220138
O04487	Probable elongation factor 1-gamma 1 OS=Arabidopsis thaliana GN=At1g09640 PE=2 SV=1 - [EF1G1_ARATH]	279.58	51.21	4	8	19	47	414	46.6	5.48	0.989	1.009	0.994	0.961	1.049	0.978	0.996	0.997333	0.998663	0.963802
Q9SZN1	V-type proton ATPase subunit B2 OS=Arabidopsis thaliana GN=VHA-B2 PE=1 SV=1 - [VATB2_ARATH]	279.41	40.45	4	1	15	37	487	54.3	5.15	1.05	1.084	1.129	0.845	0.881	1	0.908667	1.08767	0.835428	0.0264353
Q9ZVD5	Protein argonaute 4 OS=Arabidopsis thaliana GN=AGO4 PE=1 SV=2 - [AGO4_ARATH]	278.52	22.73	3	19	19	33	924	102.8	8.88	1.078	1.145	1.079	0.846	0.8	0.86	0.835333	1.10067	0.758934	0.000754234
Q9LDN8	AT3g15280/K7L4_8 OS=Arabidopsis thaliana GN=At3g15280 PE=2 SV=1 - [Q9LDN8_ARATH]	277.44	42	1	8	8	30	150	16.1	5.25	0.728	0.734	0.713	1.307	1.58	1.256	1.381	0.725	1.90483	0.00287451
F4HQD4	Heat shock 70 kDa protein 15 OS=Arabidopsis thaliana GN=HSP70-15 PE=1 SV=1 - [HSP7P_ARATH]	274.56	41.28	2	3	32	52	831	91.6	5.19	0.986	0.956	1.058	0.946	1.09	1.068	1.03467	1	1.03467	0.556204
P49200	40S ribosomal protein S20-1 OS=Arabidopsis thaliana GN=RPS20A PE=2 SV=2 - [RS201_ARATH]	274.15	49.19	7	2	6	25	124	13.9	9.72	0.833	0.79	0.738	1.181	1.397	1.17	1.24933	0.787	1.58746	0.00422174
P42644	14-3-3-like protein GF14 psi OS=Arabidopsis thaliana GN=GRF3 PE=1 SV=2 - [14333_ARATH]	273.95	67.06	2	8	18	49	255	28.6	4.79	0.978	1.059	0.941	0.965	1.141	0.96	1.022	0.992667	1.02955	0.692484
Q39044	Vacuolar-processing enzyme beta-isozyme OS=Arabidopsis thaliana GN=bVPE PE=2 SV=3 - [VPEB_ARATH]	273.73	27.37	2	10	10	34	486	53.8	6.28	1.108	1.141	1.129	0.909	0.862	0.852	0.874333	1.126	0.776495	0.000231565
P46422	Glutathione S-transferase F2 OS=Arabidopsis thaliana GN=GSTF2 PE=1 SV=3 - [GSTF2_ARATH]	273.64	67.92	3	1	13	38	212	24.1	6.35	1.133	1.327	1.257	0.667	0.874	0.621	0.720667	1.239	0.581652	0.00575656
F4JTH0	Aspartate aminotransferase OS=Arabidopsis thaliana GN=ASP5 PE=3 SV=1 - [F4JTH0_ARATH]	273.59	37.5	4	14	15	39	448	49.3	7.87	1.094	1.115	1.08	0.893	0.917	0.856	0.888667	1.09633	0.810581	0.000529577
Q9FLH2	2-oxoglutarate dehydrogenase, E1 component OS=Arabidopsis thaliana GN=At5g65750 PE=2 SV=1 - [Q9FLH2_ARATH]	272.49	27.22	9	21	21	34	1025	116.3	7.3	0.996	0.989	1.01	1.007	1.018	0.995	1.00667	0.998333	1.00835	0.41009
Q944G9	Probable fructose-bisphosphate aldolase 2, chloroplastic OS=Arabidopsis thaliana GN=FBA2 PE=1 SV=2 - [ALFC2_ARATH]	272.27	33.17	2	6	11	29	398	43	7.24	1.052	1.057	1.056	0.895	0.915	0.956	0.922	1.055	0.873934	0.00179582
Q940B0	60S ribosomal protein L18-3 OS=Arabidopsis thaliana GN=RPL18C PE=2 SV=1 - [RL183_ARATH]	272.16	48.66	2	1	9	26	187	21	10.96	1.024	1.304	0.981	0.878	0.908	0.903	0.896333	1.103	0.812632	0.111912
P42791	60S ribosomal protein L18-2 OS=Arabidopsis thaliana GN=RPL18B PE=1 SV=2 - [RL182_ARATH]	272.16	51.87	2	2	10	27	187	20.9	10.98	1.074	0.945	1.028	1.052	1.018	0.915	0.995	1.01567	0.979652	0.730191
P28297	Isocitrate lyase OS=Arabidopsis thaliana GN=ICL PE=1 SV=2 - [ACEA_ARATH]	272.07	38.72	1	17	17	29	576	64.2	7.2	0.916	0.996	0.966	1.05	1.021	1.003	1.02467	0.959333	1.0681	0.0731599
Q9FPF0	Protein DJ-1 homolog A OS=Arabidopsis thaliana GN=DJ1A PE=1 SV=1 - [DJ1A_ARATH]	271.09	30.87	2	12	12	26	392	41.8	5.41	0.854	0.885	0.842	1.16	1.27	1.079	1.16967	0.860333	1.35955	0.00552509
Q9C524	Probable fructokinase-6, chloroplastic OS=Arabidopsis thaliana GN=At1g66430 PE=2 SV=1 - [SCRK6_ARATH]	270.91	39.06	2	10	12	31	384	41.4	5.77	1.077	1.139	1.023	0.917	0.974	0.885	0.925333	1.07967	0.857055	0.0220209
Q9M888	T-complex protein 1 subunit zeta 1 OS=Arabidopsis thaliana GN=CCT6A PE=1 SV=1 - [TCPZA_ARATH]	270.5	28.41	1	2	11	19	535	58.9	6.21	0.977	1.166	1.014	0.885	1.163	0.832	0.96	1.05233	0.912258	0.477015
Q9SHG8	At1g17100 OS=Arabidopsis thaliana GN=F20D23.21 PE=2 SV=1 - [Q9SHG8_ARATH]	270	37.93	1	5	5	10	232	25.4	4.92	1.078	1.085	1.115	0.899	0.952	0.824	0.891667	1.09267	0.816046	0.006621
Q9FNP8	40S ribosomal protein S19-3 OS=Arabidopsis thaliana GN=RPS19C PE=2 SV=1 - [RS193_ARATH]	267.63	51.05	2	3	8	36	143	15.7	10.21	0.93	0.93	0.947	1.054	1.145	1.075	1.09133	0.935667	1.16637	0.00518283
Q9C7Z0	Dessication-related protein, putative; 70055-71849 OS=Arabidopsis thaliana GN=T2J15.11 PE=4 SV=1 - [Q9C7Z0_ARATH]	266.38	36.42	3	7	10	18	302	32.8	8.19	1.028	0.959	0.972	1.014	1.119	1.017	1.05	0.986333	1.06455	0.190925
Q9FT52	ATP synthase subunit d, mitochondrial OS=Arabidopsis thaliana GN=At3g52300 PE=1 SV=3 - [ATP5H_ARATH]	266.29	69.05	2	15	15	40	168	19.6	5.19	0.754	0.798	0.81	1.214	1.358	1.212	1.26133	0.787333	1.60203	0.000759615
Q9SCX3	Elongation factor 1-beta 2 OS=Arabidopsis thaliana GN=At5g19510 PE=1 SV=1 - [EF1B2_ARATH]	265.64	50	5	6	10	37	224	24.2	4.56	1.017	1.074	1.06	0.937	1.073	0.872	0.960667	1.05033	0.91463	0.219514
P31414	Pyrophosphate-energized vacuolar membrane proton pump 1 OS=Arabidopsis thaliana GN=AVP1 PE=1 SV=1 - [AVP1_ARATH]	265.43	14.55	3	12	12	20	770	80.8	5.26	1.021	1.154	1.046	0.946	0.982	0.927	0.951667	1.07367	0.886371	0.0498064
O23144	Proton pump-interactor 1 OS=Arabidopsis thaliana GN=PPI1 PE=1 SV=2 - [PPI1_ARATH]	265.25	36.44	2	23	23	38	612	68.8	9.03	1.032	1.042	1.018	0.977	1.048	0.94	0.988333	1.03067	0.958926	0.261949
Q8LDQ7	Nuclear RNA binding protein A-like protein OS=Arabidopsis thaliana PE=2 SV=1 - [Q8LDQ7_ARATH]	264.63	23.53	5	6	10	40	357	37.9	8.53	0.737	0.753	0.771	1.213	1.433	1.242	1.296	0.753667	1.71959	0.00147151
A8MSB9	Glycine-rich RNA-binding protein 2 OS=Arabidopsis thaliana GN=GR-RBP2 PE=4 SV=1 - [A8MSB9_ARATH]	264.06	44.44	4	4	4	14	144	14.7	7.34	0.767	0.727	0.754	1.28	1.361	1.248	1.29633	0.749333	1.72998	0.000105031
P41916	GTP-binding nuclear protein Ran-1 OS=Arabidopsis thaliana GN=RAN1 PE=1 SV=1 - [RAN1_ARATH]	263.52	48.87	4	10	10	31	221	25.3	6.86	1.046	1.069	1.051	0.955	0.984	0.906	0.948333	1.05533	0.89861	0.0108723
P59259	Histone H4 OS=Arabidopsis thaliana GN=At1g07660 PE=1 SV=2 - [H4_ARATH]	263.16	59.22	2	9	9	38	103	11.4	11.47	1.015	1.112	0.999	0.953	0.939	0.926	0.939333	1.042	0.901472	0.0468816
P46309	Glutamate--cysteine ligase, chloroplastic OS=Arabidopsis thaliana GN=GSH1 PE=1 SV=2 - [GSH1_ARATH]	262.8	25.1	2	13	13	28	522	58.5	6.57	1.034	1.046	1.038	0.974	0.964	0.952	0.963333	1.03933	0.926876	0.000473772
Q9T074	Phosphoenolpyruvate carboxykinase [ATP] OS=Arabidopsis thaliana GN=PCKA PE=1 SV=1 - [PCKA_ARATH]	261.79	37.56	6	19	19	32	671	73.4	7.08	0.924	0.995	0.97	1.045	1.095	1.001	1.047	0.963	1.08723	0.0699834
Q940P8	T-complex protein 1 subunit beta OS=Arabidopsis thaliana GN=CCT2 PE=1 SV=1 - [TCPB_ARATH]	261.18	37.57	1	17	17	26	527	57.2	5.87	1.02	1.019	1.042	0.974	0.955	0.955	0.961333	1.027	0.93606	0.00260132
F1LIM0	Actin 1 OS=Arabidopsis thaliana PE=3 SV=1 - [F1LIM0_ARATH]	258.28	38.99	16	2	12	47	377	41.7	5.49	1.011	0.993	0.892	1.078	1.012	1.021	1.037	0.965333	1.07424	0.166307
P46643	Aspartate aminotransferase, mitochondrial OS=Arabidopsis thaliana GN=ASP1 PE=1 SV=1 - [AAT1_ARATH]	258.08	53.26	2	19	19	39	430	47.7	8.19	0.884	0.884	0.857	1.104	1.206	1.139	1.14967	0.875	1.3139	0.000923949
Q9SAU2	D-ribulose-5-phosphate-3-epimerase OS=Arabidopsis thaliana GN=RPE PE=2 SV=1 - [Q9SAU2_ARATH]	257.7	30.25	2	6	6	16	281	30	8.07	1.084	1.098	1.124	0.84	0.91	0.881	0.877	1.102	0.795826	0.000658901
Q8LC43	Atpm24.1 glutathione S transferase OS=Arabidopsis thaliana PE=2 SV=1 - [Q8LC43_ARATH]	257.17	64.15	1	1	13	37	212	24	6.54	1.03	1.186	0.938	0.922	1.108	0.85	0.96	1.05133	0.913126	0.4358
Q8L7N0	T-complex protein 1 subunit zeta 2 OS=Arabidopsis thaliana GN=CCT6B PE=1 SV=1 - [TCPZB_ARATH]	256.8	28.79	1	2	11	18	535	58.9	6.25	0.892	1.043	0.841	1.003	1.291	1.04	1.11133	0.925333	1.20101	0.162865
P34795	Glucose-6-phosphate isomerase, cytosolic OS=Arabidopsis thaliana GN=PGIC PE=1 SV=1 - [G6PI_ARATH]	255.87	36.25	2	18	18	39	560	61.7	6.65	1.043	1.035	1.069	0.97	0.973	0.981	0.974667	1.049	0.929139	0.00231551
Q8LDN5	Topoisomerase-like protein OS=Arabidopsis thaliana PE=2 SV=1 - [Q8LDN5_ARATH]	255.33	19.94	3	11	11	13	702	77.5	5.22	1.051	1.068	0.999	0.916	0.986	0.979	0.960333	1.03933	0.92399	0.0603149
Q9FFT4	Pyruvate decarboxylase 2 OS=Arabidopsis thaliana GN=PDC2 PE=2 SV=1 - [PDC2_ARATH]	254.11	19.11	6	10	10	21	607	65.8	5.96	1.004	1.117	1.042	0.964	0.999	0.902	0.955	1.05433	0.905786	0.0852549
A8MQA1	60S ribosomal protein L13 OS=Arabidopsis thaliana GN=BBC1 PE=1 SV=1 - [A8MQA1_ARATH]	252.05	42.65	8	10	10	28	204	23.5	11	0.965	0.917	1.062	0.999	1.069	0.957	1.00833	0.981333	1.02751	0.641654
P59224	40S ribosomal protein S13-2 OS=Arabidopsis thaliana GN=RPS13B PE=2 SV=1 - [RS132_ARATH]	248.23	60.93	1	1	10	37	151	17.1	10.39	1.04	1.066	1.137	0.908	1.015	0.834	0.919	1.081	0.850139	0.0541083
O23254	Serine hydroxymethyltransferase 4 OS=Arabidopsis thaliana GN=SHM4 PE=1 SV=1 - [GLYC4_ARATH]	246.97	41.83	2	16	16	41	471	51.7	7.23	1.023	1.061	1.054	0.885	0.962	0.922	0.923	1.046	0.882409	0.00805645
Q84R10	Probable pectinesterase/pectinesterase inhibitor 36 OS=Arabidopsis thaliana GN=PME36 PE=2 SV=2 - [PME36_ARATH]	245.39	26.59	1	12	12	28	519	57.8	9.32	1.088	1.168	1.099	0.879	0.888	0.84	0.869	1.11833	0.777049	0.00101199
Q96321	Importin subunit alpha-1 OS=Arabidopsis thaliana GN=IMPA1 PE=1 SV=2 - [IMPA1_ARATH]	244.56	32.33	5	5	12	15	532	58.6	5.27	1.07	1.002	0.98	1.012	0.971	0.949	0.977333	1.01733	0.960682	0.289392
Q39085	Delta(24)-sterol reductase OS=Arabidopsis thaliana GN=DIM PE=1 SV=2 - [DIM_ARATH]	244.05	24.06	1	10	10	20	561	65.4	7.97	1.02	1.018	0.965	1.028	1.065	0.986	1.02633	1.001	1.02531	0.432697
Q9FWY8	Putative uncharacterized protein At1g02700 OS=Arabidopsis thaliana GN=T14P4.2 PE=2 SV=1 - [Q9FWY8_ARATH]	243.02	61.13	1	10	10	30	247	27.4	5.34	0.731	0.714	0.712	1.286	1.494	1.29	1.35667	0.719	1.88688	0.000759566
P27323	Heat shock protein 90-1 OS=Arabidopsis thaliana GN=HSP90-1 PE=1 SV=3 - [HS901_ARATH]	242.74	29.71	4	11	20	34	700	80.6	5.05	1.094	1.173	1.129	0.862	0.794	0.834	0.83	1.132	0.733216	0.000561558
B9DFR1	AT1G22300 protein OS=Arabidopsis thaliana GN=At1g22300 PE=2 SV=1 - [B9DFR1_ARATH]	242.67	42.91	8	9	11	23	254	28.9	4.81	0.936	1.058	0.98	0.963	1.09	0.97	1.00767	0.991333	1.01648	0.779373
Q9LVI9	Dihydropyrimidine dehydrogenase (NADP(+)), chloroplastic OS=Arabidopsis thaliana GN=PYD1 PE=1 SV=1 - [DPYD_ARATH]	242.67	40.61	2	13	13	26	426	46.8	6.8	1.015	1.076	1.014	0.944	1.012	0.926	0.960667	1.035	0.92818	0.0891115
O82399	Probable malate dehydrogenase, glyoxysomal OS=Arabidopsis thaliana GN=At2g22780 PE=2 SV=1 - [MDHG2_ARATH]	242.48	40.96	1	10	10	16	354	37.4	7.96	1.054	1.037	1.032	0.928	0.944	0.966	0.946	1.041	0.908742	0.00179624
Q9FGT8	Temperature-induced lipocalin-1 OS=Arabidopsis thaliana GN=TIL PE=1 SV=1 - [TIL_ARATH]	242.35	44.62	1	10	10	59	186	21.4	6.35	0.827	0.826	0.844	1.204	1.245	1.165	1.20467	0.832333	1.44734	9.78767e-05
Q96327	ERBB-3 BINDING PROTEIN 1 OS=Arabidopsis thaliana GN=EBP1 PE=1 SV=1 - [EBP1_ARATH]	241.88	35.46	1	17	17	36	392	43	6.8	0.993	1.077	1.074	0.957	1.006	0.927	0.963333	1.048	0.919211	0.0776664
Q9SJH7	Citrate synthase 3, peroxisomal OS=Arabidopsis thaliana GN=CSY3 PE=2 SV=1 - [CISY3_ARATH]	241.74	27.5	1	8	12	22	509	56.1	7.66	1.028	1.039	1.039	0.966	1.019	0.939	0.974667	1.03533	0.941404	0.0632375
P31265	Translationally-controlled tumor protein 1 OS=Arabidopsis thaliana GN=TCTP1 PE=1 SV=2 - [TCTP1_ARATH]	241.04	55.95	2	11	11	27	168	18.9	4.64	1.032	1.082	1.111	0.871	1.003	0.877	0.917	1.075	0.853023	0.031802
P42794	60S ribosomal protein L11-2 OS=Arabidopsis thaliana GN=RPL11B PE=2 SV=2 - [RL112_ARATH]	240.89	45.05	2	7	7	23	182	20.8	9.92	0.993	1.13	0.945	0.963	1.058	0.913	0.978	1.02267	0.956323	0.55736
Q9ZV18	PR-6 proteinase inhibitor family protein OS=Arabidopsis thaliana GN=At2g38870 PE=2 SV=2 - [Q9ZV18_ARATH]	239.57	40	3	2	2	8	70	7.6	6.58	0.757	0.718	0.779	1.238	1.386	1.309	1.311	0.751333	1.7449	0.000268842
F4IQK5	Vicilin-like seed storage protein At2g18540 OS=Arabidopsis thaliana GN=At2g18540 PE=3 SV=1 - [VCL21_ARATH]	239.55	32.25	2	20	20	49	707	84.7	6.16	0.998	1.073	1.061	0.916	1.009	0.903	0.942667	1.044	0.902937	0.0674267
F4J8J7	Universal stress protein-like protein OS=Arabidopsis thaliana GN=At3g11930 PE=1 SV=1 - [F4J8J7_ARATH]	238.23	41.21	5	8	8	17	199	21.4	5.78	0.916	1.013	0.969	1.058	1.058	1.032	1.04933	0.966	1.08627	0.0469028
P10795	Ribulose bisphosphate carboxylase small chain 1A, chloroplastic OS=Arabidopsis thaliana GN=RBCS-1A PE=1 SV=2 - [RBS1A_ARATH]	237.37	63.33	13	12	12	47	180	20.2	7.71	1.016	1.05	1.063	0.958	0.94	0.898	0.932	1.043	0.893576	0.00802116
Q93Z70	Probable N-acetyl-gamma-glutamyl-phosphate reductase, chloroplastic OS=Arabidopsis thaliana GN=At2g19940 PE=1 SV=2 - [ARGC_ARATH]	237.28	29.18	1	10	10	17	401	44.1	8.29	0.893	0.838	0.862	1.164	1.238	1.12	1.174	0.864333	1.35827	0.00122553
P46644	Aspartate aminotransferase 3, chloroplastic OS=Arabidopsis thaliana GN=ASP3 PE=1 SV=1 - [AAT3_ARATH]	236.74	45.21	2	13	18	34	449	48.9	9.29	0.942	1.036	0.974	0.969	1.007	0.985	0.987	0.984	1.00305	0.924428
Q9SK39	Probable steroid-binding protein 3 OS=Arabidopsis thaliana GN=MP3 PE=1 SV=1 - [SBP3_ARATH]	236.51	78	1	6	6	17	100	11	4.88	0.642	0.704	0.682	1.374	1.67	1.321	1.455	0.676	2.15237	0.00210505
Q9MAK9	26S protease regulatory subunit S10B homolog B OS=Arabidopsis thaliana GN=RPT4B PE=1 SV=1 - [PS10B_ARATH]	236.38	39.85	4	12	13	22	399	44.7	8.19	1.023	1.06	1.019	0.965	1.017	0.953	0.978333	1.034	0.946164	0.0776158
Q9LE44	At3g12960 OS=Arabidopsis thaliana GN=At3g12960 PE=2 SV=1 - [Q9LE44_ARATH]	236.04	63.95	1	6	6	27	86	9.5	6.11	0.725	0.688	0.759	1.252	1.292	1.294	1.27933	0.724	1.76703	2.29757e-05
Q9SU63	Aldehyde dehydrogenase family 2 member B4, mitochondrial OS=Arabidopsis thaliana GN=ALDH2B4 PE=2 SV=1 - [AL2B4_ARATH]	235.37	41.64	3	16	19	36	538	58.6	7.46	1.006	1.074	1.05	0.966	0.997	0.913	0.958667	1.04333	0.91885	0.0552156
Q9FWA3	6-phosphogluconate dehydrogenase, decarboxylating 3 OS=Arabidopsis thaliana GN=At3g02360 PE=2 SV=1 - [6GPD3_ARATH]	234.92	40.33	1	15	18	36	486	53.5	7.42	1.026	1.148	1.103	0.9	0.975	0.88	0.918333	1.09233	0.840708	0.0192261
P38666	60S ribosomal protein L24-2 OS=Arabidopsis thaliana GN=RPL24B PE=1 SV=2 - [RL242_ARATH]	234.47	41.72	3	8	8	27	163	18.6	10.78	0.984	0.989	1.032	0.994	1.05	0.977	1.007	1.00167	1.00532	0.851986
P46010	Nitrilase 3 OS=Arabidopsis thaliana GN=NIT3 PE=1 SV=1 - [NRL3_ARATH]	234.22	29.19	2	1	8	23	346	38	5.95	0.997	0.851	1.02	0.965	1.204	1.044	1.071	0.956	1.12029	0.261306
O65282	20 kDa chaperonin, chloroplastic OS=Arabidopsis thaliana GN=CPN21 PE=1 SV=2 - [CH10C_ARATH]	232.61	59.68	2	14	14	34	253	26.8	8.88	0.889	0.902	0.955	1.108	1.168	1.089	1.12167	0.915333	1.22542	0.00271443
Q9FVV1	GDSL esterase/lipase At1g71250 OS=Arabidopsis thaliana GN=At1g71250 PE=2 SV=1 - [GDL28_ARATH]	232.55	37.97	1	8	8	15	374	41.2	8.91	0.965	0.947	0.976	1.081	1.051	1.041	1.05767	0.962667	1.09868	0.00294746
O78310	Superoxide dismutase [Cu-Zn] 2, chloroplastic OS=Arabidopsis thaliana GN=CSD2 PE=1 SV=2 - [SODC2_ARATH]	232.31	49.07	3	8	8	21	216	22.2	7.01	0.825	0.92	0.886	1.135	1.278	1.095	1.16933	0.877	1.33333	0.0092628
Q01525	14-3-3-like protein GF14 omega OS=Arabidopsis thaliana GN=GRF2 PE=2 SV=2 - [14332_ARATH]	231.91	73.36	1	9	18	43	259	29.1	4.79	1.009	1.082	1.005	0.966	0.993	0.914	0.957667	1.032	0.927972	0.0948551
Q9SP02	Peptidyl-prolyl cis-trans isomerase CYP20-1 OS=Arabidopsis thaliana GN=CYP20-1 PE=1 SV=1 - [CP20A_ARATH]	231.41	34.8	3	4	8	40	204	21.9	9.06	0.947	1.051	1.012	0.963	1.034	0.93	0.975667	1.00333	0.972425	0.556264
F4IX28	Peptidyl-prolyl cis-trans isomerase OS=Arabidopsis thaliana GN=ROC4 PE=3 SV=1 - [F4IX28_ARATH]	231.18	30.5	5	7	8	33	259	28.1	8.75	1.128	1.156	1.156	0.83	0.857	0.812	0.833	1.14667	0.726453	4.0582e-05
O49485	D-3-phosphoglycerate dehydrogenase 1, chloroplastic OS=Arabidopsis thaliana GN=PGDH1 PE=1 SV=1 - [SERA1_ARATH]	231.09	30.85	4	16	16	31	603	63.3	6.58	1.052	1.096	1.059	0.936	0.946	0.885	0.922333	1.069	0.8628	0.00325704
Q9SAK4	Succinate-semialdehyde dehydrogenase, mitochondrial OS=Arabidopsis thaliana GN=ALDH5F1 PE=1 SV=2 - [SSDH_ARATH]	230.41	32.95	1	15	15	27	528	56.5	6.92	1.004	1.063	1.043	0.972	0.969	0.951	0.964	1.03667	0.929904	0.0172042
P48348	14-3-3-like protein GF14 kappa OS=Arabidopsis thaliana GN=GRF8 PE=1 SV=2 - [14338_ARATH]	229.67	46.37	3	2	13	29	248	28	4.89	1.003	0.823	1.139	1.01	0.967	1.006	0.994333	0.988333	1.00607	0.951414
P25697	Phosphoribulokinase, chloroplastic OS=Arabidopsis thaliana GN=At1g32060 PE=2 SV=1 - [KPPR_ARATH]	229.63	33.16	1	10	10	29	395	44.4	6.05	1.019	1.071	1.06	0.965	0.912	0.888	0.921667	1.05	0.877778	0.00979619
P60039	60S ribosomal protein L7-3 OS=Arabidopsis thaliana GN=RPL7C PE=2 SV=1 - [RL73_ARATH]	229.54	55.37	5	4	15	47	242	27.9	9.94	1.033	1.11	1.065	0.883	0.958	0.871	0.904	1.06933	0.845387	0.00933903
P36212	50S ribosomal protein L12-3, chloroplastic OS=Arabidopsis thaliana GN=RPL12C PE=2 SV=2 - [RK123_ARATH]	229.44	32.09	3	7	7	21	187	19.7	5.64	1.099	1.097	1.16	0.859	0.913	0.851	0.874333	1.11867	0.781585	0.00100312
Q9M111	Sucrose synthase 3 OS=Arabidopsis thaliana GN=SUS3 PE=1 SV=1 - [SUS3_ARATH]	229.1	29.67	4	22	23	45	809	91.9	6.25	1.016	1.078	1.025	0.941	0.967	0.925	0.944333	1.03967	0.908304	0.0140869
Q8LDI4	Quinone oxidoreductase-like protein OS=Arabidopsis thaliana PE=2 SV=1 - [Q8LDI4_ARATH]	228.08	23.03	15	1	7	21	343	38.1	8.02	1.225	1.314	1.084	0.804	0.752	0.734	0.763333	1.20767	0.632073	0.00318395
Q94FY7	Tocopherol cyclase, chloroplastic OS=Arabidopsis thaliana GN=VTE1 PE=2 SV=1 - [TOCC_ARATH]	227.66	45.08	1	19	19	34	488	54.7	6.32	1.055	1.085	1.055	0.944	0.912	0.878	0.911333	1.065	0.855712	0.00203447
B9DHM5	AT4G15530 protein OS=Arabidopsis thaliana GN=At4g15530 PE=2 SV=1 - [B9DHM5_ARATH]	227.21	34.74	3	25	25	40	875	95.3	5.52	0.993	1.007	1.003	1.032	1.016	0.961	1.003	1.001	1.002	0.93163
P19036	17.4 kDa class I heat shock protein OS=Arabidopsis thaliana GN=HSP17.4A PE=1 SV=2 - [HSP17_ARATH]	226.87	52.56	2	6	10	45	156	17.4	5.29	0.958	1.039	1.038	0.969	1.119	0.895	0.994333	1.01167	0.982867	0.819504
Q9FKK1	Protein transport protein SEC61 subunit beta OS=Arabidopsis thaliana GN=At5g60460 PE=2 SV=1 - [Q9FKK1_ARATH]	226.81	62.39	1	4	4	10	109	10.9	11.56	1.028	0.937	1.065	0.979	1.015	0.946	0.98	1.01	0.970297	0.523205
Q9LX13	(3R)-hydroxymyristoyl-[acyl carrier protein] dehydratase-like protein OS=Arabidopsis thaliana GN=T31P16_150 PE=2 SV=1 - [Q9LX13_ARATH]	223.37	41.1	1	6	8	24	219	24.1	9.26	1.033	1.139	1.086	0.844	0.952	0.88	0.892	1.086	0.821363	0.0116945
Q9SYX7	HVA22-like protein b OS=Arabidopsis thaliana GN=HVA22B PE=2 SV=2 - [HA22B_ARATH]	223.31	43.71	1	7	7	38	167	18.7	6.95	0.952	1.018	0.966	1.06	1.066	1.03	1.052	0.978667	1.07493	0.033086
Q38867	Peptidyl-prolyl cis-trans isomerase CYP19-3 OS=Arabidopsis thaliana GN=CYP19-3 PE=2 SV=2 - [CP19C_ARATH]	223.22	50.57	1	7	9	31	176	18.9	7.81	0.804	0.782	0.776	1.202	1.432	1.213	1.28233	0.787333	1.6287	0.00278283
Q9S791	AT1G70770 protein OS=Arabidopsis thaliana GN=F5A18.5 PE=1 SV=1 - [Q9S791_ARATH]	223.11	24.75	5	12	12	27	610	66.8	8.88	1.052	1.024	1.046	0.952	0.969	0.97	0.963667	1.04067	0.926009	0.00172591
Q9SH69	6-phosphogluconate dehydrogenase, decarboxylating 1, chloroplastic OS=Arabidopsis thaliana GN=At1g64190 PE=1 SV=1 - [6PGD1_ARATH]	222.85	37.99	1	6	16	27	487	53.3	5.45	1.027	1.024	1.004	1.036	1.006	0.976	1.006	1.01833	0.987889	0.546907
Q9SJI8	Multiprotein-bridging factor 1a OS=Arabidopsis thaliana GN=MBF1A PE=2 SV=1 - [MBF1A_ARATH]	222.67	50	1	1	6	14	142	15.6	9.89	0.832	0.774	0.769	1.206	1.401	1.23	1.279	0.791667	1.61558	0.00165748
O04630	Threonine--tRNA ligase, mitochondrial 1 OS=Arabidopsis thaliana GN=THRRS PE=2 SV=3 - [SYTM1_ARATH]	222.48	28.35	1	20	20	35	709	80.9	6.98	0.982	1.067	1.034	0.941	1.009	0.978	0.976	1.02767	0.949724	0.177364
O22791	Putative RNA-binding protein OS=Arabidopsis thaliana GN=At2g33410 PE=2 SV=1 - [O22791_ARATH]	221.82	24.5	1	7	7	15	404	41.3	6.55	0.942	0.812	0.873	1.132	1.026	1.223	1.127	0.875667	1.28702	0.0211008
P59223	40S ribosomal protein S13-1 OS=Arabidopsis thaliana GN=RPS13A PE=2 SV=1 - [RS131_ARATH]	220.49	60.93	1	1	10	37	151	17.1	10.39	1.089	1.024	1.142	0.903	0.921	0.904	0.909333	1.085	0.838095	0.00710875
Q9LVI8	Glutamine synthetase cytosolic isozyme 1-3 OS=Arabidopsis thaliana GN=GLN1-3 PE=1 SV=1 - [GLN13_ARATH]	219.91	60.45	3	11	16	31	354	38.6	6.06	1.036	1.005	0.998	1.011	0.948	0.918	0.959	1.013	0.946693	0.144077
Q8RU07	Putative malonyl-CoA OS=Arabidopsis thaliana GN=At2g30200 PE=2 SV=1 - [Q8RU07_ARATH]	219.64	19.85	3	7	7	14	393	41.5	8.56	1.078	0.997	1.059	0.962	0.894	0.942	0.932667	1.04467	0.892789	0.0241752
Q9SF85	Adenosine kinase 1 OS=Arabidopsis thaliana GN=ADK1 PE=1 SV=1 - [ADK1_ARATH]	219.42	45.06	2	5	14	33	344	37.8	5.45	1.054	1.044	1.073	0.913	0.965	1.004	0.960667	1.057	0.908862	0.0253948
Q9LXT3	Multiprotein-bridging factor 1b OS=Arabidopsis thaliana GN=MBF1B PE=2 SV=1 - [MBF1B_ARATH]	219.26	47.89	1	3	8	21	142	15.6	9.99	0.715	0.735	0.739	1.349	1.395	1.28	1.34133	0.729667	1.83828	5.76567e-05
Q9CAX6	40S ribosomal protein S14-2 OS=Arabidopsis thaliana GN=RPS14B PE=1 SV=1 - [RS142_ARATH]	218.03	45.33	1	1	7	19	150	16.3	10.59	1.064	0.966	1.014	1.19	0.97	0.87	1.01	1.01467	0.995401	0.964541
Q9FFR3	6-phosphogluconate dehydrogenase, decarboxylating 2, chloroplastic OS=Arabidopsis thaliana GN=At5g41670 PE=1 SV=1 - [6PGD2_ARATH]	217.93	41.07	20	6	16	27	487	53.3	5.8	0.977	1.08	0.971	1.025	1.047	1.014	1.02867	1.00933	1.01915	0.626033
Q9SGA6	40S ribosomal protein S19-1 OS=Arabidopsis thaliana GN=RPS19A PE=2 SV=1 - [RS191_ARATH]	217.27	57.34	2	4	9	42	143	15.8	10.08	0.954	1.027	0.991	1.037	1.064	0.927	1.00933	0.990667	1.01884	0.710948
O82762	F17H15.1/F17H15.1 OS=Arabidopsis thaliana GN=At2g25970 PE=1 SV=1 - [O82762_ARATH]	217.18	20.25	3	10	10	19	632	64.6	5.49	0.76	0.715	0.778	1.307	1.42	1.236	1.321	0.751	1.75899	0.000552775
Q9LD55	Eukaryotic translation initiation factor 3 subunit A OS=Arabidopsis thaliana GN=TIF3A1 PE=1 SV=1 - [EIF3A_ARATH]	216.84	28.17	4	26	26	45	987	114.2	9.17	1.023	1.035	1.022	0.954	0.974	0.97	0.966	1.02667	0.940909	0.00120684
O80504	Chloroplast chaperonin 10 OS=Arabidopsis thaliana GN=cpn10 PE=2 SV=1 - [O80504_ARATH]	216.81	41.01	3	4	4	13	139	15	8.48	0.931	0.914	0.988	1.065	1.131	1.053	1.083	0.944333	1.14684	0.0136689
Q8L733	Putative transferase At4g12130, mitochondrial OS=Arabidopsis thaliana GN=At4g12130 PE=1 SV=1 - [Y4121_ARATH]	216.61	55.22	1	16	16	32	393	43.5	6.73	1.033	1.077	1.108	0.891	0.932	0.929	0.917333	1.07267	0.85519	0.00364485
Q9SKY8	Heat shock 70 kDa protein 8 OS=Arabidopsis thaliana GN=HSP70-8 PE=1 SV=1 - [HSP7H_ARATH]	215.27	24.51	1	11	11	20	563	61	5.67	1.022	1.047	1.046	0.931	0.915	0.973	0.939667	1.03833	0.904976	0.00670648
P48006	Elongation factor 1-delta 1 OS=Arabidopsis thaliana GN=At1g30230 PE=1 SV=2 - [EF1D1_ARATH]	213.63	47.62	4	5	10	32	231	25.1	4.56	0.996	1.064	0.99	0.989	1.053	0.95	0.997333	1.01667	0.980984	0.639991
Q9SEI2	26S protease regulatory subunit 6A homolog A OS=Arabidopsis thaliana GN=RPT5A PE=1 SV=1 - [PS6AA_ARATH]	213.41	36.79	3	11	12	22	424	47.5	5.03	1.126	1.04	1.109	0.881	0.83	0.91	0.873667	1.09167	0.800305	0.00345156
B9DGT6	AT1G53310 protein OS=Arabidopsis thaliana GN=At1g53310 PE=2 SV=1 - [B9DGT6_ARATH]	212.75	22.75	3	13	22	35	967	110.2	6.06	1.047	1.161	1.009	0.929	0.926	1.002	0.952333	1.07233	0.888094	0.0822105
Q9SIH0	40S ribosomal protein S14-1 OS=Arabidopsis thaliana GN=RPS14A PE=1 SV=1 - [RS141_ARATH]	212.09	45.33	1	1	7	20	150	16.2	10.59	1.025	1.055	1.069	0.986	0.911	0.961	0.952667	1.04967	0.90759	0.0192458
Q93ZN2	Probable aldo-keto reductase 4 OS=Arabidopsis thaliana GN=At1g60710 PE=2 SV=1 - [ALKR4_ARATH]	210.26	41.74	6	9	16	28	345	37.9	6.3	1.093	1.121	1.142	0.885	0.938	0.879	0.900667	1.11867	0.805125	0.000752742
O22588	Probable aquaporin TIP3-2 OS=Arabidopsis thaliana GN=TIP3-2 PE=2 SV=1 - [TIP32_ARATH]	210.06	7.87	2	2	2	17	267	28.2	7.06	0.96	1.08	0.925	0.93	1.166	0.929	1.00833	0.988333	1.02024	0.838106
Q9SX77	Succinate dehydrogenase subunit 5, mitochondrial OS=Arabidopsis thaliana GN=SDH5 PE=1 SV=1 - [SDH5_ARATH]	210.04	28.02	1	5	5	12	257	28.1	6.65	0.988	1.057	1.023	0.996	0.978	0.979	0.984333	1.02267	0.962516	0.13852
O23708	Proteasome subunit alpha type-2-A OS=Arabidopsis thaliana GN=PAB1 PE=1 SV=1 - [PSA2A_ARATH]	209.84	65.11	2	15	15	30	235	25.7	5.69	1.045	1	1.064	0.926	0.981	0.864	0.923667	1.03633	0.891283	0.0438145
Q9XFK7	Protein MOTHER of FT and TFL1 OS=Arabidopsis thaliana GN=MFT PE=1 SV=1 - [MFT_ARATH]	209.79	43.35	1	7	7	20	173	19.1	8.19	0.768	0.788	0.802	1.274	1.298	1.218	1.26333	0.786	1.60729	4.92552e-05
Q8LDP4	Peptidyl-prolyl cis-trans isomerase CYP19-4 OS=Arabidopsis thaliana GN=CYP19-4 PE=1 SV=2 - [CP19D_ARATH]	209.18	27.36	6	2	7	34	201	21.5	9.03	0.971	0.947	1.157	0.86	0.896	1.02	0.925333	1.025	0.902764	0.291903
C0Z361	Chaperonin 60 subunit beta 3, chloroplastic OS=Arabidopsis thaliana GN=CPN60B3 PE=1 SV=1 - [CPNB3_ARATH]	209.06	28.31	2	4	14	24	597	63.3	5.87	0.945	0.969	0.974	1.032	1.065	1.001	1.03267	0.962667	1.07271	0.0270437
Q3EDG6	Uncharacterized protein OS=Arabidopsis thaliana GN=At1g07985 PE=2 SV=1 - [Q3EDG6_ARATH]	208.75	55.56	2	7	7	16	144	16.5	9.06	0.881	0.898	0.942	1.142	1.161	1.052	1.11833	0.907	1.233	0.00522449
Q9C7F7	Non-specific lipid transfer protein GPI-anchored 1 OS=Arabidopsis thaliana GN=LTPG1 PE=1 SV=1 - [LTPG1_ARATH]	208.35	26.94	1	7	7	27	193	19.7	7.65	1.013	0.997	1.079	1.047	1	0.962	1.003	1.02967	0.974102	0.490073
Q9ZPI1	Lysine--tRNA ligase, cytoplasmic OS=Arabidopsis thaliana GN=At3g11710 PE=1 SV=1 - [SYKC_ARATH]	208.24	27.64	2	16	16	28	626	70.8	6.24	0.961	1.053	0.998	1.015	1.044	0.95	1.003	1.004	0.999004	0.980551
Q8L934	Nucleoid DNA-binding-like protein OS=Arabidopsis thaliana PE=2 SV=1 - [Q8L934_ARATH]	208.16	24.47	2	8	8	20	425	45.5	9.09	0.902	0.855	0.857	1.157	1.16	1.17	1.16233	0.871333	1.33397	5.16431e-05
Q9M9K1	Probable 2,3-bisphosphoglycerate-independent phosphoglycerate mutase 2 OS=Arabidopsis thaliana GN=At3g08590 PE=1 SV=1 - [PMG2_ARATH]	207.83	38.04	6	20	20	37	560	60.7	5.85	0.872	0.909	0.89	1.123	1.169	1.14	1.144	0.890333	1.28491	0.000121891
Q9LF04	Stearoyl-[acyl-carrier-protein] 9-desaturase 1, chloroplastic OS=Arabidopsis thaliana GN=S-ACP-DES1 PE=1 SV=1 - [STAD1_ARATH]	207.73	45.43	5	6	14	27	394	45	6.55	1.029	1.119	1.103	0.888	0.948	0.877	0.904333	1.08367	0.834512	0.00717173
Q9SR67	AT3g10020/T22K18_16 OS=Arabidopsis thaliana GN=T22K18.16 PE=1 SV=1 - [Q9SR67_ARATH]	207.44	53.02	2	11	12	22	149	16.7	5.35	0.684	0.775	0.762	1.294	1.484	1.215	1.331	0.740333	1.79784	0.00222665
Q9S850	Sulfite oxidase OS=Arabidopsis thaliana GN=SOX PE=1 SV=1 - [SUOX_ARATH]	206.9	30.03	3	10	10	16	393	43.3	8.68	1.141	1.172	1.109	0.862	0.857	0.823	0.847333	1.14067	0.74284	0.000180628
O82663	Succinate dehydrogenase [ubiquinone] flavoprotein subunit 1, mitochondrial OS=Arabidopsis thaliana GN=SDH1-1 PE=1 SV=1 - [SDHA1_ARATH]	206.6	28.55	2	14	14	21	634	69.6	6.29	1.056	1.121	1.029	0.901	0.996	0.95	0.949	1.06867	0.888022	0.0365008
Q9LZ82	Protein BTR1 OS=Arabidopsis thaliana GN=BTR1 PE=1 SV=1 - [BTR1_ARATH]	206.51	46.33	1	13	13	32	313	33.8	6.01	1.015	1.108	1.082	0.968	0.925	0.912	0.935	1.06833	0.875195	0.0147638
C0Z325	AT3G02090 protein OS=Arabidopsis thaliana GN=At3g02090 PE=2 SV=1 - [C0Z325_ARATH]	206.5	31.67	3	13	13	17	480	53.7	6.16	0.968	1.021	0.935	1.003	1.056	1.066	1.04167	0.974667	1.06874	0.102644
Q93VR3	GDP-mannose 3,5-epimerase OS=Arabidopsis thaliana GN=At5g28840 PE=1 SV=1 - [GME_ARATH]	206.45	45.09	1	15	15	31	377	42.7	6.21	0.976	0.981	1.026	1.033	1.04	0.978	1.017	0.994333	1.0228	0.419949
Q84W88	Putative uncharacterized protein At1g72100 OS=Arabidopsis thaliana GN=At1g72100 PE=2 SV=1 - [Q84W88_ARATH]	203.85	27.08	2	13	13	31	480	52.7	8.48	1.051	1.144	1.071	0.878	0.976	0.849	0.901	1.08867	0.827618	0.0170389
Q9LY84	GDSL esterase/lipase At5g14450 OS=Arabidopsis thaliana GN=At5g14450 PE=2 SV=1 - [GDL76_ARATH]	203.79	31.36	1	12	12	18	389	43.5	8.46	0.92	0.867	0.898	1.111	1.147	1.058	1.10533	0.895	1.23501	0.00219935
O81148	Proteasome subunit alpha type-4-A OS=Arabidopsis thaliana GN=PAC1 PE=1 SV=1 - [PSA4A_ARATH]	202.77	40	2	8	8	16	250	27.5	7.11	0.991	1.115	1.128	0.93	0.931	0.866	0.909	1.078	0.843228	0.0255269
Q9M1R2	Proline--tRNA ligase, cytoplasmic OS=Arabidopsis thaliana GN=At3g62120 PE=2 SV=1 - [SYPC_ARATH]	202.56	47.17	1	19	19	24	530	60.7	6.4	0.994	1.084	0.971	0.995	1.041	0.948	0.994667	1.01633	0.978682	0.646026
P0DH98	Calmodulin-3 OS=Arabidopsis thaliana GN=CAM3 PE=1 SV=1 - [CALM3_ARATH]	202.5	57.05	10	1	9	22	149	16.8	4.27	1.111	0.937	1.033	0.989	0.963	0.993	0.981667	1.027	0.955858	0.42587
Q9S841	Oxygen-evolving enhancer protein 1-2, chloroplastic OS=Arabidopsis thaliana GN=PSBO2 PE=1 SV=1 - [PSBO2_ARATH]	202.43	41.09	1	1	12	17	331	35	6.16	0.845	0.88	0.913	1.193	1.255	1.079	1.17567	0.879333	1.337	0.00579606
P0DH95	Calmodulin-1 OS=Arabidopsis thaliana GN=CAM1 PE=2 SV=1 - [CALM1_ARATH]	202.39	57.05	9	1	9	24	149	16.9	4.27	0.958	0.981	1.13	0.93	1.011	0.968	0.969667	1.023	0.947866	0.415466
P93026	Vacuolar-sorting receptor 1 OS=Arabidopsis thaliana GN=VSR1 PE=1 SV=2 - [VSR1_ARATH]	201.18	34.51	4	18	20	39	623	68.9	6.28	0.9	0.893	0.933	1.097	1.176	1.095	1.12267	0.908667	1.23551	0.00188957
Q93VH9	40S ribosomal protein S4-1 OS=Arabidopsis thaliana GN=RPS4A PE=2 SV=1 - [RS41_ARATH]	201.13	67.05	8	1	19	78	261	29.8	10.17	1.035	1.186	1.083	0.819	1.002	0.877	0.899333	1.10133	0.816586	0.0447493
Q8VYK6	40S ribosomal protein S4-3 OS=Arabidopsis thaliana GN=RPS4D PE=2 SV=2 - [RS43_ARATH]	201.13	66.79	4	1	19	76	262	29.8	10.21	0.906	1.197	1.041	0.834	1.08	0.976	0.963333	1.048	0.919211	0.485292
O23138	Cytochrome c-1 OS=Arabidopsis thaliana GN=CYTC-1 PE=1 SV=1 - [CYC1_ARATH]	200.22	36.84	2	3	4	22	114	12.4	9.31	0.871	0.754	0.85	1.204	1.236	1.2	1.21333	0.825	1.47071	0.000504821
Q9FLG1	Beta-D-xylosidase 4 OS=Arabidopsis thaliana GN=BXL4 PE=1 SV=1 - [BXL4_ARATH]	199.74	20.41	7	11	13	25	784	84.3	7.66	1.164	1.163	1.106	0.833	0.805	0.791	0.809667	1.14433	0.707544	0.000125372
Q944K2	Dolichyl-diphosphooligosaccharide--protein glycosyltransferase 48 kDa subunit OS=Arabidopsis thaliana GN=OST48 PE=2 SV=1 - [OST48_ARATH]	199.59	27.23	1	11	11	17	437	48.7	6.34	1.041	1.071	1.065	0.928	0.967	0.882	0.925667	1.059	0.874095	0.00705437
Q9LZG0	Adenosine kinase 2 OS=Arabidopsis thaliana GN=ADK2 PE=1 SV=1 - [ADK2_ARATH]	199.52	32.75	1	2	11	26	345	37.8	5.26	0.952	1.019	1.106	1.226	0.888	0.813	0.975667	1.02567	0.951251	0.729167
Q9FXA2	Polyadenylate-binding protein 8 OS=Arabidopsis thaliana GN=PAB8 PE=1 SV=1 - [PABP8_ARATH]	199.44	23.4	1	10	11	17	671	72.7	7.53	1.019	0.979	1.016	0.977	1.001	0.959	0.979	1.00467	0.974453	0.220732
O23715	Proteasome subunit alpha type-3 OS=Arabidopsis thaliana GN=PAG1 PE=1 SV=2 - [PSA3_ARATH]	198.51	45.78	1	9	9	16	249	27.4	6.32	0.983	1.014	0.985	0.998	1.068	1.013	1.02633	0.994	1.03253	0.241175
F4KGV2	14-3-3-like protein GF14 lambda OS=Arabidopsis thaliana GN=GRF6 PE=3 SV=1 - [F4KGV2_ARATH]	197.9	41.46	5	1	11	23	246	27.7	4.89	1.064	1.208	1.043	1.013	0.861	0.817	0.897	1.105	0.811765	0.0576675
Q9SR73	40S ribosomal protein S28-1 OS=Arabidopsis thaliana GN=RPS28A PE=3 SV=1 - [RS281_ARATH]	197.36	39.06	2	1	3	13	64	7.4	10.83	0.966	0.826	0.917	1.113	1.229	1.077	1.13967	0.903	1.26209	0.0183556
Q8L742	Amine oxidase OS=Arabidopsis thaliana GN=At4g12290 PE=2 SV=1 - [Q8L742_ARATH]	197.27	26.99	4	5	16	28	741	83.2	6.23	0.943	0.911	0.992	1.094	1.049	1.103	1.082	0.948667	1.14055	0.00989914
Q05758	Ketol-acid reductoisomerase, chloroplastic OS=Arabidopsis thaliana GN=At3g58610 PE=2 SV=2 - [ILV5_ARATH]	196.5	24.03	3	12	12	24	591	63.8	6.8	1.032	1.089	1.044	0.978	0.978	0.936	0.964	1.055	0.913744	0.0150748
Q9LIK0	Plastidial pyruvate kinase 1, chloroplastic OS=Arabidopsis thaliana GN=PKP1 PE=1 SV=1 - [PKP1_ARATH]	196.46	18.96	1	9	9	19	596	65.1	5.92	0.984	1.043	1.014	0.957	0.94	0.971	0.956	1.01367	0.943111	0.040094
P23321	Oxygen-evolving enhancer protein 1-1, chloroplastic OS=Arabidopsis thaliana GN=PSBO1 PE=1 SV=2 - [PSBO1_ARATH]	195.86	37.65	1	1	12	18	332	35.1	5.66	0.801	0.985	0.893	1.316	1.105	1.069	1.16333	0.893	1.30272	0.0446088
Q940M2	Alanine--glyoxylate aminotransferase 2 homolog 1, mitochondrial OS=Arabidopsis thaliana GN=AGT2 PE=2 SV=1 - [AGT21_ARATH]	195.86	38.24	1	14	14	30	476	51.9	7.85	1.059	1.078	1.091	0.952	0.925	0.942	0.939667	1.076	0.873296	0.000363157
O65351	Subtilisin-like protease SBT1.7 OS=Arabidopsis thaliana GN=SBT1.7 PE=1 SV=1 - [SBT17_ARATH]	195.77	13.74	2	8	8	15	757	79.4	6.35	1.023	1.007	1.003	0.983	0.996	0.897	0.958667	1.011	0.948236	0.173637
Q9FL02	AT5g66780/MUD21_2 OS=Arabidopsis thaliana GN=At5g66780 PE=2 SV=1 - [Q9FL02_ARATH]	195.42	51.24	1	5	5	30	121	13.4	6.93	0.662	0.708	0.739	1.323	1.48	1.329	1.37733	0.703	1.95922	0.000273123
Q9SUU5	Cytochrome b-c1 complex subunit 7-1 OS=Arabidopsis thaliana GN=QCR7-1 PE=1 SV=1 - [QCR71_ARATH]	193.99	49.18	4	6	6	18	122	14.5	9.73	0.796	0.781	0.775	1.204	1.419	1.18	1.26767	0.784	1.61692	0.00316202
Q84WV1	T-complex protein 1 subunit gamma OS=Arabidopsis thaliana GN=CCT3 PE=1 SV=1 - [TCPG_ARATH]	193.1	40.72	1	19	19	29	555	60.3	5.77	0.985	0.994	1.012	1.003	1.017	0.957	0.992333	0.997	0.995319	0.825119
O23181	Patatin-like protein 3 OS=Arabidopsis thaliana GN=PLP3 PE=2 SV=2 - [PLP3_ARATH]	193.07	25	1	8	8	11	428	47.2	6.21	1.019	0.993	1.051	1.007	1.063	0.94	1.00333	1.021	0.982697	0.676422
Q8GZ29	At5g13370 OS=Arabidopsis thaliana GN=At5g13370 PE=2 SV=1 - [Q8GZ29_ARATH]	192.98	27.73	5	10	15	23	595	66.9	5.71	0.986	0.969	1.015	1.077	1.008	1.076	1.05367	0.99	1.06431	0.0740888
Q8LEZ6	Adenylosuccinate synthetase, chloroplastic OS=Arabidopsis thaliana GN=PURA PE=2 SV=1 - [Q8LEZ6_ARATH]	192.94	39.8	3	15	15	29	490	52.9	7.14	1.104	1.101	1.083	0.867	0.858	0.912	0.879	1.096	0.802007	0.000268213
P13853	17.6 kDa class I heat shock protein 3 OS=Arabidopsis thaliana GN=HSP17.6C PE=2 SV=2 - [HS17C_ARATH]	192.21	29.3	3	1	5	23	157	17.6	5.47	NA	NA	NA	NA	NA	NA	NA	NA	NA	NA
Q9SS17	40S ribosomal protein S24-1 OS=Arabidopsis thaliana GN=RPS24A PE=2 SV=1 - [RS241_ARATH]	192.17	32.33	1	2	5	20	133	15.4	10.7	0.988	1.067	1.045	0.94	1.045	0.928	0.971	1.03333	0.939677	0.229445
Q9ASS6	Photosynthetic NDH subunit of lumenal location 5, chloroplastic OS=Arabidopsis thaliana GN=PNSL5 PE=1 SV=1 - [PNSL5_ARATH]	191.69	31.27	3	6	7	33	259	28.3	9.31	1	0.978	0.941	1.036	1.024	0.98	1.01333	0.973	1.04145	0.171043
Q9FE06	Protein EXORDIUM-like 2 OS=Arabidopsis thaliana GN=EXL2 PE=2 SV=1 - [EXOL2_ARATH]	191.31	27.87	1	6	8	23	305	32.7	9.38	0.978	1.023	0.994	1.006	1.025	1.007	1.01267	0.998333	1.01436	0.380193
B5TM95	NADH dehydrogenase subunit 7 OS=Arabidopsis thaliana PE=2 SV=1 - [B5TM95_ARATH]	191.17	29.7	5	9	9	18	394	45	7.12	1.074	1.116	1.06	0.907	0.919	0.94	0.922	1.08333	0.851077	0.00114069
Q9LSV0	Glyoxylate/succinic semialdehyde reductase 1 OS=Arabidopsis thaliana GN=GLYR1 PE=1 SV=1 - [GLYR1_ARATH]	190.71	31.14	1	6	6	9	289	30.7	6.13	1.013	1.001	1.033	0.958	0.964	0.995	0.972333	1.01567	0.957335	0.0427638
Q9MAH3	Protein DJ-1 homolog B OS=Arabidopsis thaliana GN=DJ1B PE=1 SV=1 - [DJ1B_ARATH]	188.39	24.2	2	8	8	13	438	47	7.85	1.067	1.054	1.045	0.936	0.956	0.958	0.95	1.05533	0.90019	0.000375222
Q9SKR2	Synaptotagmin-1 OS=Arabidopsis thaliana GN=SYT1 PE=1 SV=2 - [SYT1_ARATH]	188.37	52.13	5	22	22	34	541	61.7	7.56	1.022	0.992	0.995	0.997	1.007	0.968	0.990667	1.003	0.987704	0.459695
Q8VZ50	Probable calcium-binding protein CML14 OS=Arabidopsis thaliana GN=CML14 PE=2 SV=1 - [CML14_ARATH]	188.02	78.38	1	4	10	22	148	16.6	5.02	0.851	0.858	0.817	1.205	1.28	1.212	1.23233	0.842	1.46358	0.000134328
P42731	Polyadenylate-binding protein 2 OS=Arabidopsis thaliana GN=PAB2 PE=1 SV=1 - [PABP2_ARATH]	187.52	24.48	2	12	13	16	629	68.6	8.21	0.952	0.902	0.924	1.127	1.139	1.107	1.12433	0.926	1.21418	0.000324298
Q9ZU25	Probable mitochondrial-processing peptidase subunit alpha-1, mitochondrial OS=Arabidopsis thaliana GN=At1g51980 PE=2 SV=1 - [MPPA1_ARATH]	186.96	25.84	2	7	13	22	503	54.4	6.33	0.977	1.001	0.976	0.997	0.932	0.937	0.955333	0.984667	0.97021	0.26096
Q8LD03	40S ribosomal protein S7-3 OS=Arabidopsis thaliana GN=RPS7C PE=1 SV=2 - [RS73_ARATH]	186.93	42.11	1	5	7	19	190	22	9.74	1.061	1.028	1.024	0.963	0.968	0.969	0.966667	1.03767	0.931577	0.00392639
Q42342	Cytochrome b5 isoform E OS=Arabidopsis thaliana GN=CYTB5-E PE=1 SV=2 - [CYB5E_ARATH]	186.63	55.22	1	6	6	18	134	15.1	5.33	0.964	0.972	0.969	0.953	1.092	1.011	1.01867	0.968333	1.05198	0.280555
Q9FLW9	Plastidial pyruvate kinase 2 OS=Arabidopsis thaliana GN=PKP2 PE=1 SV=1 - [PKP2_ARATH]	186.25	30.57	2	15	15	24	579	63.5	7.03	1.024	1.082	1.079	0.896	0.925	0.894	0.905	1.06167	0.852433	0.00183575
P49227	60S ribosomal protein L5-2 OS=Arabidopsis thaliana GN=RPL5B PE=2 SV=3 - [RL52_ARATH]	185.96	32.23	4	1	10	20	301	34.4	9.17	1.083	1.039	1.146	0.885	0.924	0.916	0.908333	1.08933	0.833843	0.00552975
Q8LBI1	60S ribosomal protein L5-1 OS=Arabidopsis thaliana GN=ATL5 PE=2 SV=2 - [RL51_ARATH]	185.96	31.89	6	1	10	20	301	34.3	9.31	0.965	0.949	0.831	1.134	1.039	1.202	1.125	0.915	1.22951	0.0295918
Q9M879	Stearoyl-[acyl-carrier-protein] 9-desaturase 5, chloroplastic OS=Arabidopsis thaliana GN=S-ACP-DES5 PE=1 SV=1 - [STAD5_ARATH]	185.81	36.87	5	6	12	27	396	45.3	6.23	1.022	1.048	1.07	0.938	0.996	0.882	0.938667	1.04667	0.896815	0.0390117
Q9ZUX4	Uncharacterized protein At2g27730, mitochondrial OS=Arabidopsis thaliana GN=At2g27730 PE=1 SV=1 - [UMP2_ARATH]	185.51	46.02	3	4	5	14	113	11.9	9.64	0.832	0.862	0.856	1.155	1.233	1.08	1.156	0.85	1.36	0.00246576
Q9FKG8	Putative quinone oxidoreductase OS=Arabidopsis thaliana GN=At5g61510 PE=2 SV=1 - [Q9FKG8_ARATH]	185.26	34.57	2	10	10	20	324	34.7	6.93	1.008	1.037	1.056	0.963	0.926	0.956	0.948333	1.03367	0.917446	0.00901064
Q8LG89	Basic blue protein OS=Arabidopsis thaliana GN=ARPN PE=2 SV=2 - [BABL_ARATH]	185.21	49.61	1	6	6	19	129	14	9.5	0.764	0.744	0.784	1.231	1.353	1.328	1.304	0.764	1.70681	0.000157039
O64837	Reticulon-like protein B13 OS=Arabidopsis thaliana GN=RTNLB13 PE=2 SV=1 - [RTNLM_ARATH]	185.2	33.98	1	6	6	13	206	23.8	7.49	1.029	1.077	0.996	0.932	0.955	0.875	0.920667	1.034	0.890393	0.0275596
O81146	Proteasome subunit alpha type-6-A OS=Arabidopsis thaliana GN=PAA1 PE=1 SV=2 - [PSA6A_ARATH]	185.15	46.75	3	4	10	20	246	27.3	5.86	1.087	1.026	1.007	0.894	0.913	0.935	0.914	1.04	0.878846	0.00939817
F4JFY5	L-ascorbate peroxidase S OS=Arabidopsis thaliana GN=SAPX PE=3 SV=1 - [F4JFY5_ARATH]	184.35	45.82	5	10	13	35	371	40.3	7.94	0.76	0.789	0.807	1.254	1.361	1.196	1.27033	0.785333	1.61757	0.0006435
Q41916	Cysteine proteinase inhibitor 5 OS=Arabidopsis thaliana GN=CYS5 PE=2 SV=2 - [CYT5_ARATH]	184.11	62.3	1	5	5	20	122	13.4	8.41	0.821	0.859	0.888	1.207	1.252	1.161	1.20667	0.856	1.40966	0.000426332
E0Y422	Cytochrome b6-f complex iron-sulfur subunit OS=Arabidopsis thaliana GN=At4g03280 PE=3 SV=1 - [E0Y422_ARATH]	183.37	27.95	2	5	5	16	229	24.3	8.54	0.784	0.761	0.799	1.26	1.51	1.252	1.34067	0.781333	1.71587	0.00281158
Q944P7	Leucine aminopeptidase 3, chloroplastic OS=Arabidopsis thaliana GN=At4g30920 PE=2 SV=2 - [AMPL3_ARATH]	182.86	35.68	5	8	16	26	583	61.3	7.08	1.028	0.99	1.093	0.954	0.981	0.96	0.965	1.037	0.930569	0.0820149
Q8W593	Probable lactoylglutathione lyase, chloroplastic OS=Arabidopsis thaliana GN=At1g67280 PE=1 SV=1 - [LGUC_ARATH]	182.56	28.86	1	8	9	17	350	39.1	7.37	1.019	1.039	1.16	0.916	0.914	0.832	0.887333	1.07267	0.827222	0.0235257
Q9M0E2	60S ribosomal protein L28-2 OS=Arabidopsis thaliana GN=RPL28C PE=2 SV=1 - [RL282_ARATH]	181.88	51.05	4	4	7	16	143	15.9	11.05	0.985	1.036	1.077	1.009	1.027	0.933	0.989667	1.03267	0.95836	0.334445
Q8GXU7	At4g13612 OS=Arabidopsis thaliana GN=At4g13615 PE=2 SV=1 - [Q8GXU7_ARATH]	181.82	23.94	1	2	2	3	71	7.2	10.71	0.758	0.763	0.693	1.3	1.431	1.323	1.35133	0.738	1.83107	0.000186872
F4J109	Transport protein SEC31 OS=Arabidopsis thaliana GN=At3g63460 PE=1 SV=1 - [F4J109_ARATH]	181.34	18.51	5	16	16	24	1102	119.6	5.14	0.997	1.048	1.032	0.952	0.96	1.006	0.972667	1.02567	0.948326	0.0787615
Q9C5C8	Peptide methionine sulfoxide reductase B2, chloroplastic OS=Arabidopsis thaliana GN=MSRB2 PE=1 SV=1 - [MSRB2_ARATH]	181.26	35.15	2	5	6	26	202	22	8.56	0.817	0.728	0.823	1.267	1.187	1.322	1.25867	0.789333	1.59459	0.000706423
Q96255	Phosphoserine aminotransferase 1, chloroplastic OS=Arabidopsis thaliana GN=PSAT1 PE=1 SV=1 - [SERB1_ARATH]	181.11	28.14	2	5	11	20	430	47.3	8.06	0.99	0.812	0.911	1.091	1.196	1.087	1.12467	0.904333	1.24364	0.0245174
P94078	Alpha-mannosidase OS=Arabidopsis thaliana GN=At3g26720 PE=2 SV=1 - [P94078_ARATH]	181.01	21	3	19	19	34	1019	115.1	6.73	1.065	0.996	1.013	1.001	0.963	1.002	0.988667	1.02467	0.964867	0.214195
F4JWM1	40S ribosomal protein S16-3 OS=Arabidopsis thaliana GN=At5g18380 PE=3 SV=1 - [F4JWM1_ARATH]	180.92	57.55	4	2	9	21	139	16	9.86	1.123	1.145	1.112	0.91	0.918	0.801	0.876333	1.12667	0.777811	0.00301764
Q96273	LEA D113 homologue type2 OS=Arabidopsis thaliana GN=LEA18 PE=2 SV=1 - [Q96273_ARATH]	180.51	62.89	1	6	7	38	97	10.5	9.66	0.758	0.774	0.819	1.374	1.309	1.23	1.30433	0.783667	1.6644	0.000331733
Q9LD43	Acetyl-coenzyme A carboxylase carboxyl transferase subunit alpha, chloroplastic OS=Arabidopsis thaliana GN=CAC3 PE=1 SV=1 - [ACCA_ARATH]	180.47	29.39	3	19	19	26	769	85.3	5.82	1.072	1.103	1.129	0.889	0.854	0.824	0.855667	1.10133	0.776937	0.000599897
Q56ZQ3	Vacuolar-sorting receptor 4 OS=Arabidopsis thaliana GN=VSR4 PE=2 SV=2 - [VSR4_ARATH]	180.47	18.47	2	3	10	21	628	69.8	5.48	1.162	0.991	1.193	0.781	0.88	0.836	0.832333	1.11533	0.746264	0.0148558
Q9M2D8	Uncharacterized protein At3g61260 OS=Arabidopsis thaliana GN=At3g61260 PE=1 SV=1 - [Y3126_ARATH]	180.24	35.38	1	6	9	23	212	23.1	5.64	0.768	0.835	0.821	1.221	1.367	1.161	1.24967	0.808	1.54662	0.00237814
Q93ZT6	Eukaryotic translation initiation factor isoform 4G-1 OS=Arabidopsis thaliana GN=EIF(ISO)4G1 PE=1 SV=1 - [IF4G1_ARATH]	180.16	31.15	3	22	23	29	780	85.5	8.24	1.004	0.981	0.977	0.994	1.057	1.022	1.02433	0.987333	1.03747	0.139056
Q9SGC1	Probable phosphoglucomutase, cytoplasmic 2 OS=Arabidopsis thaliana GN=At1g70730 PE=2 SV=1 - [PGMC2_ARATH]	180.06	40.85	3	11	20	43	585	63.4	5.82	0.961	1.025	0.987	0.961	1.022	0.98	0.987667	0.991	0.996636	0.903757
Q9SJ36	40S ribosomal protein S17-2 OS=Arabidopsis thaliana GN=RPS17B PE=2 SV=3 - [RS172_ARATH]	179.66	24.29	4	6	6	19	140	15.9	10.04	0.95	1.004	0.971	0.965	1.099	0.996	1.02	0.975	1.04615	0.358793
O48737	Thioredoxin M1, chloroplastic OS=Arabidopsis thaliana GN=At1g03680 PE=2 SV=1 - [TRXM1_ARATH]	179.57	29.05	1	5	5	17	179	19.7	8.95	0.858	0.853	0.893	1.123	1.283	1.093	1.16633	0.868	1.3437	0.00777522
Q9C5M0	Mitochondrial dicarboxylate/tricarboxylate transporter DTC OS=Arabidopsis thaliana GN=DTC PE=1 SV=1 - [DTC_ARATH]	179.28	25.84	2	7	7	11	298	31.9	9.23	1.013	1.112	1.083	0.906	0.912	0.937	0.918333	1.06933	0.858791	0.00810237
Q9FPJ4	Ras-related protein RABD2b OS=Arabidopsis thaliana GN=RABD2B PE=2 SV=1 - [RAD2B_ARATH]	179.11	68.32	6	2	12	29	202	22.3	5.43	0.995	1.005	1.084	1.152	0.906	0.895	0.984333	1.028	0.957523	0.64755
Q9SEH3	Ras-related protein RABD2c OS=Arabidopsis thaliana GN=RABD2C PE=2 SV=1 - [RAD2C_ARATH]	179.11	68.32	6	2	12	30	202	22.3	5.43	1.104	1.206	1.124	0.873	0.809	0.854	0.845333	1.14467	0.738497	0.0012074
Q9C8W7	At1g71950 OS=Arabidopsis thaliana GN=F17M19.10 PE=1 SV=1 - [Q9C8W7_ARATH]	178.48	30.15	2	4	4	16	136	14.8	6.15	0.825	0.875	0.846	1.135	1.257	1.165	1.18567	0.848667	1.39709	0.00103191
Q9LRX8	60S ribosomal protein L13a-2 OS=Arabidopsis thaliana GN=RPL13AB PE=1 SV=1 - [R13A2_ARATH]	177.79	49.03	2	5	12	28	206	23.4	10.35	0.981	1.024	0.974	1.068	1.049	1.009	1.042	0.993	1.04935	0.104155
O80977	Vacuolar-sorting receptor 3 OS=Arabidopsis thaliana GN=VSR3 PE=2 SV=1 - [VSR3_ARATH]	177.38	13.69	1	1	8	19	628	69.7	5.36	1.076	1.122	1.083	0.865	0.959	0.888	0.904	1.09367	0.826577	0.00392427
F4I576	Monodehydroascorbate reductase OS=Arabidopsis thaliana GN=MDAR6 PE=4 SV=1 - [F4I576_ARATH]	177.37	34.44	5	14	14	26	482	52.1	7.75	1.071	1.053	1.088	0.89	0.874	0.948	0.904	1.07067	0.844334	0.0024944
P93028	Ubiquitin-activating enzyme E1 1 OS=Arabidopsis thaliana GN=UBA1 PE=1 SV=1 - [UBE11_ARATH]	176.58	15.37	2	10	15	30	1080	120.2	5.27	0.956	1.047	1.016	1.027	0.996	0.965	0.996	1.00633	0.989732	0.764011
Q9FF10	Heparanase-like protein 1 OS=Arabidopsis thaliana GN=At5g07830 PE=2 SV=1 - [HPSE1_ARATH]	176.38	19.34	1	7	7	14	543	60.2	8.91	0.997	1.014	0.978	1.041	0.997	0.982	1.00667	0.996333	1.01037	0.641215
Q94K05	T-complex protein 1 subunit theta OS=Arabidopsis thaliana GN=CCT8 PE=1 SV=1 - [TCPQ_ARATH]	175.55	26.96	1	12	13	20	549	58.9	5.35	1.033	0.997	0.963	0.964	1.005	0.933	0.967333	0.997667	0.969596	0.355178
Q8LPJ3	Alpha-mannosidase OS=Arabidopsis thaliana GN=At5g13980 PE=2 SV=1 - [Q8LPJ3_ARATH]	175.45	26.66	5	23	23	38	1024	115.8	6.44	0.967	1.032	0.968	1.019	1.082	1.022	1.041	0.989	1.05258	0.155087
Q93W05	At1g10590/F20B24_1 OS=Arabidopsis thaliana GN=At1g10590 PE=1 SV=1 - [Q93W05_ARATH]	175.04	46.04	3	5	5	10	139	15.4	7.2	1.068	1.074	1.063	0.933	0.836	1.016	0.928333	1.06833	0.868955	0.0548528
Q9SLM6	Glutathione S-transferase F3 OS=Arabidopsis thaliana GN=GSTF3 PE=2 SV=1 - [GSTF3_ARATH]	174.72	50.94	2	3	11	33	212	24.1	6.74	0.992	1.052	1.044	0.947	1.06	0.962	0.989667	1.02933	0.961464	0.378727
Q9FH82	Pectin acetylesterase 11 OS=Arabidopsis thaliana GN=PAE11 PE=2 SV=1 - [PAE11_ARATH]	174.5	19.95	2	4	7	15	391	42	8.66	1.028	1.011	1.04	0.951	0.942	0.895	0.929333	1.02633	0.905489	0.00734531
O22866	Defensin-like protein 193 OS=Arabidopsis thaliana GN=ATTI2 PE=3 SV=1 - [DF193_ARATH]	174.22	46.67	1	3	3	18	90	9.7	8.98	0.811	0.734	0.809	1.274	1.316	1.303	1.29767	0.784667	1.65378	5.38321e-05
Q9SKP6	Triosephosphate isomerase, chloroplastic OS=Arabidopsis thaliana GN=TIM PE=1 SV=1 - [TPIC_ARATH]	173.53	38.73	2	9	10	18	315	33.3	7.83	1.047	1.038	1.127	0.919	0.884	0.957	0.92	1.07067	0.859278	0.0129399
Q8L7C9	Glutathione S-transferase U20 OS=Arabidopsis thaliana GN=GSTU20 PE=1 SV=1 - [GSTUK_ARATH]	172.99	44.7	2	12	13	43	217	25	5.78	1.097	1.18	1.1	0.835	0.909	0.821	0.855	1.12567	0.75955	0.002162
B9DHF9	AT1G62640 protein OS=Arabidopsis thaliana GN=At1g62640 PE=2 SV=1 - [B9DHF9_ARATH]	172.89	25.74	2	9	9	14	404	42.8	7.36	1.109	1.125	1.064	0.838	0.802	0.86	0.833333	1.09933	0.758035	0.000433905
P54150	Peptide methionine sulfoxide reductase A4, chloroplastic OS=Arabidopsis thaliana GN=MSR4 PE=1 SV=2 - [MSRA4_ARATH]	172.71	19.77	1	4	5	18	258	28.6	8.75	0.759	0.824	0.769	1.239	1.395	1.175	1.26967	0.784	1.61947	0.00207663
Q9LP45	26S proteasome non-ATPase regulatory subunit 11 homolog OS=Arabidopsis thaliana GN=RPN6 PE=1 SV=1 - [PSD11_ARATH]	172.69	31.98	1	12	12	19	419	46.7	6.67	0.933	1.08	1.041	0.993	0.979	1.028	1	1.018	0.982318	0.717356
Q9FMU7	Translocon-associated protein subunit beta OS=Arabidopsis thaliana PE=3 SV=1 - [Q9FMU7_ARATH]	172.57	15.03	2	2	2	9	193	20.9	9.6	1.033	1.161	1.025	0.933	0.955	0.862	0.916667	1.073	0.854303	0.0402295
Q5GM68	Phosphoenolpyruvate carboxylase 2 OS=Arabidopsis thaliana GN=PPC2 PE=1 SV=2 - [CAPP2_ARATH]	172.19	28.76	4	15	24	34	963	109.7	5.8	1.047	1.086	1.025	0.912	1.03	0.953	0.965	1.05267	0.916719	0.0873813
O23016	Probable voltage-gated potassium channel subunit beta OS=Arabidopsis thaliana GN=KAB1 PE=1 SV=1 - [KCAB_ARATH]	171.79	39.33	2	12	12	24	328	36.5	7.42	0.984	1.143	1.04	0.968	0.96	0.894	0.940667	1.05567	0.891064	0.0920475
Q9T0G2	Cytochrome c-2 OS=Arabidopsis thaliana GN=CYTC-2 PE=1 SV=1 - [CYC2_ARATH]	171.43	25.89	1	2	3	17	112	12.2	9.32	0.804	0.829	0.999	1.132	1.129	1.135	1.132	0.877333	1.29027	0.014197
Q9LF93	Pyruvate kinase OS=Arabidopsis thaliana GN=F8J2_160 PE=3 SV=1 - [Q9LF93_ARATH]	171.24	33.46	3	5	15	24	514	55.9	7.24	1.03	1.048	1.085	0.962	0.865	0.982	0.936333	1.05433	0.888081	0.0407239
Q9SII9	Ubiquitin domain-containing protein DSK2a OS=Arabidopsis thaliana GN=DSK2A PE=1 SV=2 - [DSK2A_ARATH]	171.12	26.77	1	5	11	19	538	57.2	4.79	0.829	0.801	0.833	1.277	1.297	1.225	1.26633	0.821	1.54243	4.72479e-05
Q8S8R1	Expressed protein OS=Arabidopsis thaliana GN=At2g23120 PE=2 SV=1 - [Q8S8R1_ARATH]	170.95	81.93	2	3	3	12	83	8.5	4.61	0.586	0.679	0.65	1.411	1.692	1.347	1.48333	0.638333	2.32376	0.00151588
F4JL11	Importin subunit alpha-2 OS=Arabidopsis thaliana GN=IMPA2 PE=1 SV=1 - [IMPA2_ARATH]	170.88	33.27	6	6	12	18	535	58.9	5.1	1.004	0.972	0.975	1.015	1.008	1.146	1.05633	0.983667	1.07387	0.189507
Q494N8	Oleosin OS=Arabidopsis thaliana GN=At2g25890 PE=2 SV=1 - [Q494N8_ARATH]	170.32	28.86	3	3	3	9	149	16.1	9.48	0.89	1.239	0.924	1.096	1.007	0.86	0.987667	1.01767	0.970521	0.829693
Q38882	Phospholipase D alpha 1 OS=Arabidopsis thaliana GN=PLDALPHA1 PE=1 SV=2 - [PLDA1_ARATH]	169.69	24.57	3	15	15	30	810	91.8	5.87	1.083	1.006	1.023	0.942	0.945	0.966	0.951	1.03733	0.916774	0.0245078
Q8LPJ4	ABC transporter E family member 2 OS=Arabidopsis thaliana GN=ABCE2 PE=2 SV=1 - [AB2E_ARATH]	169.37	19.17	2	11	11	15	605	68.3	7.96	1.017	1.012	1.022	0.993	0.965	0.933	0.963667	1.017	0.947558	0.0385863
Q8W4H8	Inactive GDSL esterase/lipase-like protein 23 OS=Arabidopsis thaliana GN=GLL23 PE=1 SV=1 - [GDL19_ARATH]	169.31	37.05	2	9	11	21	386	43.1	8.07	0.768	0.744	0.777	1.289	1.314	1.287	1.29667	0.763	1.69943	2.19088e-06
Q9FKW6	Ferredoxin--NADP reductase, leaf isozyme 1, chloroplastic OS=Arabidopsis thaliana GN=LFNR1 PE=1 SV=1 - [FNRL1_ARATH]	168.9	41.11	4	9	13	34	360	40.3	8.13	0.986	1.022	1.017	0.983	1.012	0.971	0.988667	1.00833	0.980496	0.301192
Q9LJL3	Presequence protease 1, chloroplastic/mitochondrial OS=Arabidopsis thaliana GN=PREP1 PE=1 SV=2 - [PREP1_ARATH]	168.68	19.07	3	18	18	21	1080	120.9	5.68	1.015	1.04	1.036	0.935	0.982	0.937	0.951333	1.03033	0.923326	0.010067
Q93VT9	60S ribosomal protein L10-1 OS=Arabidopsis thaliana GN=RPL10A PE=1 SV=1 - [RL101_ARATH]	168.52	44.55	3	3	12	27	220	24.9	10.49	0.998	1.053	1.09	1.034	1.028	1.026	1.02933	1.047	0.983126	0.54628
Q8VZH2	Aminopeptidase M1 OS=Arabidopsis thaliana GN=APM1 PE=1 SV=1 - [APM1_ARATH]	168.49	41.3	1	31	31	48	879	98.1	5.5	1.009	1.038	1.023	0.984	0.994	0.971	0.983	1.02333	0.960586	0.0196007
Q9SX53	At1g50380/F14I3_27 OS=Arabidopsis thaliana GN=F14I3.4 PE=2 SV=1 - [Q9SX53_ARATH]	168.16	28.73	8	18	18	29	710	80.9	5.81	1.012	1.026	1.05	0.999	0.951	0.987	0.979	1.02933	0.951101	0.0505322
P51414	60S ribosomal protein L26-1 OS=Arabidopsis thaliana GN=RPL26A PE=2 SV=2 - [RL261_ARATH]	167.38	39.73	2	9	9	24	146	16.9	10.78	0.994	0.972	0.98	1.031	1.027	1.032	1.03	0.982	1.04888	0.00190771
Q01474	GTP-binding protein SAR1B OS=Arabidopsis thaliana GN=SAR1B PE=1 SV=1 - [SAR1B_ARATH]	166.67	50.26	6	8	8	28	193	22	7.05	0.954	1.019	0.967	1.039	1.043	0.991	1.02433	0.98	1.04524	0.162753
P42742	Proteasome subunit beta type-1 OS=Arabidopsis thaliana GN=PBF1 PE=1 SV=2 - [PSB1_ARATH]	166.22	69.06	3	12	12	18	223	24.6	7.4	0.971	1.025	0.985	1.002	1.082	1.012	1.032	0.993667	1.03858	0.269337
Q7DLR9	Proteasome subunit beta type-4 OS=Arabidopsis thaliana GN=PBG1 PE=1 SV=2 - [PSB4_ARATH]	166.03	58.54	1	10	10	23	246	27.6	6.55	0.91	1.013	0.942	1.04	1.068	1.06	1.056	0.955	1.10576	0.0328744
Q93WN0	Selenium-binding protein 2 OS=Arabidopsis thaliana GN=SBP2 PE=1 SV=1 - [SEBP2_ARATH]	165.78	32.85	2	7	12	18	487	53.9	6.19	0.884	0.927	0.891	1.132	1.217	1.206	1.185	0.900667	1.31569	0.000676381
Q9LK25	Prohibitin-4, mitochondrial OS=Arabidopsis thaliana GN=PHB4 PE=1 SV=1 - [PHB4_ARATH]	165.74	22.22	2	1	5	11	279	30.6	7.56	1.049	0.92	0.908	1.125	0.98	1.103	1.06933	0.959	1.11505	0.15888
A8MRW5	Oxidoreductase, zinc-binding dehydrogenase family protein OS=Arabidopsis thaliana GN=At4g21580 PE=4 SV=1 - [A8MRW5_ARATH]	165.51	34.17	3	8	8	16	319	33.8	7.28	1.027	0.997	1.049	0.954	0.925	1.035	0.971333	1.02433	0.948259	0.217035
O64767	AICARFT/IMPCHase bienzyme family protein OS=Arabidopsis thaliana GN=At2g35040 PE=3 SV=1 - [O64767_ARATH]	165.01	26.61	2	11	12	20	545	59.4	6.3	0.965	1.02	1.024	1.072	0.997	1.012	1.027	1.003	1.02393	0.46559
O23717	Proteasome subunit beta type-5-A OS=Arabidopsis thaliana GN=PBE1 PE=1 SV=1 - [PSB5A_ARATH]	164.76	38.69	3	7	7	11	274	29.6	6.43	0.983	0.97	0.913	1.033	1.089	0.975	1.03233	0.955333	1.0806	0.121719
Q9SI96	Histone H2B.3 OS=Arabidopsis thaliana GN=At2g28720 PE=1 SV=3 - [H2B3_ARATH]	164.4	48.34	2	2	8	34	151	16.5	9.99	0.97	1.054	0.969	1.043	1.112	0.977	1.044	0.997667	1.04644	0.389853
Q9LUE6	Probable UDP-arabinopyranose mutase 4 OS=Arabidopsis thaliana GN=RGP4 PE=1 SV=1 - [RGP4_ARATH]	164.24	37.64	1	8	12	33	364	41.8	7.03	0.933	0.839	0.877	1.112	1.169	1.161	1.14733	0.883	1.29936	0.00125784
O64764	Thioredoxin O1, mitochondrial OS=Arabidopsis thaliana GN=At2g35010 PE=2 SV=1 - [TRXO1_ARATH]	164.03	29.38	1	5	5	7	194	21.2	9.39	0.75	0.855	0.857	1.258	1.397	1.169	1.27467	0.820667	1.55321	0.00378952
P34066	Proteasome subunit alpha type-1-A OS=Arabidopsis thaliana GN=PAF1 PE=1 SV=3 - [PSA1A_ARATH]	163.33	32.37	2	8	8	15	278	30.5	5.08	0.923	0.891	0.936	1.194	1.114	1.092	1.13333	0.916667	1.23636	0.003027
Q8L835	At1g18070 OS=Arabidopsis thaliana GN=At1g18070 PE=1 SV=1 - [Q8L835_ARATH]	163.31	27.63	3	13	13	19	532	59.2	5.3	0.942	1.045	0.999	1.033	1.071	1.009	1.03767	0.995333	1.04253	0.291049
F4IHJ8	40S ribosomal protein S25-2 OS=Arabidopsis thaliana GN=At2g21580 PE=4 SV=1 - [F4IHJ8_ARATH]	162.54	22.43	3	1	2	6	107	11.9	10.68	0.914	1.024	0.95	1.013	1.123	1.051	1.06233	0.962667	1.10353	0.0946724
P46077	14-3-3-like protein GF14 phi OS=Arabidopsis thaliana GN=GRF4 PE=1 SV=2 - [14334_ARATH]	162.47	49.81	4	4	15	37	267	30.2	4.87	0.928	1.091	1.052	1.003	1.042	0.891	0.978667	1.02367	0.95604	0.537482
Q9C5Z1	Eukaryotic translation initiation factor 3 subunit B OS=Arabidopsis thaliana GN=TIF3B1 PE=1 SV=1 - [EIF3B_ARATH]	162.15	15.73	4	9	9	11	712	81.8	5.25	1.037	1.086	1.008	0.906	0.868	0.98	0.918	1.04367	0.879591	0.0347736
O49629	Probable plastid-lipid-associated protein 2, chloroplastic OS=Arabidopsis thaliana GN=PAP2 PE=2 SV=1 - [PAP2_ARATH]	161.94	42.26	1	9	10	13	310	33.6	5.83	1.058	1.019	1.066	0.965	1.029	0.919	0.971	1.04767	0.926822	0.093933
P82281	Thylakoid lumenal 29 kDa protein, chloroplastic OS=Arabidopsis thaliana GN=TL29 PE=1 SV=2 - [TL29_ARATH]	161.89	35.82	1	11	11	21	349	37.9	8.46	1.16	1.116	1.163	0.808	0.895	0.809	0.837333	1.14633	0.730445	0.000690566
O82204	60S ribosomal protein L28-1 OS=Arabidopsis thaliana GN=RPL28A PE=2 SV=1 - [RL281_ARATH]	161.71	56.64	4	5	8	24	143	15.9	10.58	0.882	0.909	0.901	1.131	1.245	1.036	1.13733	0.897333	1.26746	0.0169881
Q42219	Oleosin (Fragment) OS=Arabidopsis thaliana PE=2 SV=1 - [Q42219_ARATH]	161.48	24.14	3	1	1	41	58	6.3	9.82	1.148	1.135	1.157	0.799	0.8	0.808	0.802333	1.14667	0.699709	1.01733e-06
Q96291	2-Cys peroxiredoxin BAS1, chloroplastic OS=Arabidopsis thaliana GN=BAS1 PE=1 SV=2 - [BAS1A_ARATH]	160.95	41.73	1	5	10	22	266	29.1	7.44	0.96	1.149	1.02	0.957	1.043	0.846	0.948667	1.043	0.909556	0.302379
Q96252	ATP synthase subunit delta', mitochondrial OS=Arabidopsis thaliana GN=At5g47030 PE=1 SV=1 - [ATP4_ARATH]	160.87	31.03	1	5	5	12	203	21.5	6.7	0.924	0.996	1.031	1.059	1.087	1.045	1.06367	0.983667	1.08133	0.077268
Q9LIR4	Dihydroxy-acid dehydratase, chloroplastic OS=Arabidopsis thaliana GN=DHAD PE=1 SV=1 - [ILVD_ARATH]	160.67	26.64	4	15	15	25	608	64.9	6.23	1.004	1.023	1.046	0.992	0.983	0.997	0.990667	1.02433	0.967133	0.0583605
O22809	Cinnamoyl-CoA:NADP oxidoreductase-like 1 OS=Arabidopsis thaliana GN=At2g33590 PE=2 SV=1 - [O22809_ARATH]	160.54	31.46	2	11	11	22	321	35.9	6.92	0.967	1.045	0.952	1.035	1.068	0.985	1.02933	0.988	1.04184	0.333261
Q9FFW8	Tryptophan synthase beta chain OS=Arabidopsis thaliana GN=TSBtype2 PE=2 SV=1 - [Q9FFW8_ARATH]	160.37	26.28	1	8	8	14	506	55.7	7.24	0.912	0.943	0.93	1.08	1.109	1.019	1.06933	0.928333	1.15189	0.00730772
Q96533	Alcohol dehydrogenase class-3 OS=Arabidopsis thaliana GN=ADH2 PE=1 SV=2 - [ADHX_ARATH]	159.95	40.9	3	15	15	29	379	40.7	6.95	1.01	1.076	1.061	0.953	0.993	0.905	0.950333	1.049	0.905942	0.0380069
Q9LV21	T-complex protein 1 subunit delta OS=Arabidopsis thaliana GN=CCT4 PE=1 SV=1 - [TCPD_ARATH]	159.78	39.55	1	17	17	23	536	57.7	7.68	0.989	1.042	0.996	0.975	1.013	0.983	0.990333	1.009	0.9815	0.40882
Q944X1	2-oxoglutarate-dependent dioxygenase OS=Arabidopsis thaliana GN=AOP3 PE=2 SV=1 - [Q944X1_ARATH]	159.61	31.22	7	2	9	19	410	44.8	5.45	1.072	1.078	1.119	0.905	0.964	0.834	0.901	1.08967	0.826858	0.00950115
Q39138	LEA protein Le25 homolog OS=Arabidopsis thaliana GN=T9G5.2 PE=2 SV=1 - [Q39138_ARATH]	159.5	20.9	2	2	3	19	134	14.9	8.94	0.663	0.63	0.657	1.438	1.477	1.35	1.42167	0.65	2.18718	3.81269e-05
Q8VZ19	60S ribosomal protein L30-2 OS=Arabidopsis thaliana GN=RPL30B PE=3 SV=1 - [RL302_ARATH]	159.5	40.18	1	1	4	10	112	12.3	9.58	1.077	1.141	1.05	0.973	0.873	0.888	0.911333	1.08933	0.836597	0.012445
Q8LGG0	Peptidyl-prolyl cis-trans isomerase FKBP12 OS=Arabidopsis thaliana GN=FKBP12 PE=1 SV=2 - [FKB12_ARATH]	159.23	32.14	1	3	3	10	112	12	6.04	0.703	0.691	0.818	1.323	1.489	1.19	1.334	0.737333	1.80922	0.00334488
A8MS83	60S ribosomal protein L23a-2 OS=Arabidopsis thaliana GN=RPL23AB PE=3 SV=1 - [A8MS83_ARATH]	159.15	50.68	3	10	10	40	148	16.7	10.17	0.809	0.854	0.831	1.158	1.361	1.091	1.20333	0.831333	1.44747	0.0106152
Q9LF46	2-hydroxyacyl-CoA lyase OS=Arabidopsis thaliana GN=HACL PE=1 SV=1 - [HACL_ARATH]	159.15	36.54	1	17	17	28	572	61.4	6.05	0.998	0.988	1.009	1.013	1.056	0.99	1.01967	0.998333	1.02137	0.351974
Q00917	Sucrose synthase 2 OS=Arabidopsis thaliana GN=SUS2 PE=2 SV=3 - [SUS2_ARATH]	158.98	23.05	5	16	17	30	807	92	6.05	0.992	0.991	1.061	0.956	0.926	0.931	0.937667	1.01467	0.924113	0.0367448
Q9SII8	Ubiquitin domain-containing protein DSK2b OS=Arabidopsis thaliana GN=DSK2B PE=1 SV=1 - [DSK2B_ARATH]	158.05	32.67	1	7	13	19	551	58	4.93	0.729	0.835	0.852	1.276	1.198	1.261	1.245	0.805333	1.54594	0.00063066
Q9FLH8	Probable fructokinase-7 OS=Arabidopsis thaliana GN=At5g51830 PE=1 SV=1 - [SCRK7_ARATH]	157.78	32.07	1	9	11	17	343	37	5.15	0.884	0.827	0.874	1.169	1.246	1.137	1.184	0.861667	1.37408	0.000937629
O64879	Beta-glucosidase 15 OS=Arabidopsis thaliana GN=BGLU15 PE=1 SV=1 - [BGL15_ARATH]	157.53	24.7	23	11	12	20	506	56.9	7.71	1.012	1.059	1.008	0.934	1.013	0.945	0.964	1.02633	0.939266	0.103289
Q570U4	AT5G53895 protein OS=Arabidopsis thaliana GN=At5g53895 PE=2 SV=1 - [Q570U4_ARATH]	157.32	69.51	2	3	3	9	82	8.4	4.63	0.651	0.687	0.667	1.434	1.514	1.306	1.418	0.668333	2.1217	0.000259379
Q9S7E9	Glutamate--glyoxylate aminotransferase 2 OS=Arabidopsis thaliana GN=GGAT2 PE=1 SV=1 - [GGT2_ARATH]	157.23	40.75	1	9	16	28	481	53.4	6.58	1.017	1.093	0.991	0.964	0.921	0.975	0.953333	1.03367	0.922283	0.0819028
Q9SJU4	Probable fructose-bisphosphate aldolase 1, chloroplastic OS=Arabidopsis thaliana GN=FBA1 PE=1 SV=2 - [ALFC1_ARATH]	156.49	23.56	5	3	9	22	399	42.9	6.58	1.014	1.005	0.987	1.036	1.08	0.982	1.03267	1.002	1.03061	0.356234
O04450	T-complex protein 1 subunit epsilon OS=Arabidopsis thaliana GN=CCT5 PE=1 SV=1 - [TCPE_ARATH]	156.29	28.41	3	13	13	21	535	59.3	5.66	0.94	1.065	1.029	0.959	1.045	0.971	0.991667	1.01133	0.980554	0.69013
Q680D1	Putative uncharacterized protein At5g62200 (Fragment) OS=Arabidopsis thaliana GN=At5g62200 PE=2 SV=1 - [Q680D1_ARATH]	155.87	17.22	3	2	2	4	180	19.9	6.49	0.855	0.923	0.867	1.144	1.158	1.05	1.11733	0.881667	1.2673	0.00409773
P28769	T-complex protein 1 subunit alpha OS=Arabidopsis thaliana GN=CCT1 PE=1 SV=1 - [TCPA_ARATH]	155.8	24.95	4	11	12	15	545	59.2	6.3	0.958	0.967	1.009	0.973	0.979	1.017	0.989667	0.978	1.01193	0.606453
Q9FIX2	AIG2-like protein OS=Arabidopsis thaliana GN=At5g39720 PE=1 SV=1 - [AIG2L_ARATH]	155.72	51.52	1	7	7	18	165	19.1	5.64	1.056	1.184	1.115	0.894	0.945	0.783	0.874	1.11833	0.78152	0.0155859
Q9SIE3	At2g22230/T26C19.11 OS=Arabidopsis thaliana GN=At2g22230 PE=2 SV=2 - [Q9SIE3_ARATH]	155.31	27.73	2	4	6	15	220	24.2	8.48	1.021	1.219	1.06	0.944	0.926	0.824	0.898	1.1	0.816364	0.0469207
Q39258	V-type proton ATPase subunit E1 OS=Arabidopsis thaliana GN=VHA-E1 PE=1 SV=2 - [VATE1_ARATH]	154.99	38.26	3	9	9	18	230	26	6.4	0.974	1.028	1.061	0.998	1.028	0.978	1.00133	1.021	0.980738	0.537865
Q93Y22	Coatomer subunit delta OS=Arabidopsis thaliana GN=At5g05010 PE=1 SV=2 - [COPD_ARATH]	154.95	14.04	1	5	5	9	527	57.7	5.85	0.983	0.865	0.996	0.972	0.982	1.13	1.028	0.948	1.08439	0.291671
Q38950	Serine/threonine-protein phosphatase 2A 65 kDa regulatory subunit A beta isoform OS=Arabidopsis thaliana GN=PP2AA2 PE=1 SV=2 - [2AAB_ARATH]	154.9	30.49	2	7	13	22	587	65.6	5.14	1.159	1.011	0.97	0.997	0.924	0.981	0.967333	1.04667	0.924204	0.266763
B3H4B6	40S ribosomal protein S25-4 OS=Arabidopsis thaliana GN=At4g39200 PE=4 SV=1 - [B3H4B6_ARATH]	154.7	22.43	5	1	2	9	107	11.9	10.68	0.938	0.95	0.946	1.208	1.098	1.005	1.10367	0.944667	1.16831	0.0538033
Q9LXG1	40S ribosomal protein S9-1 OS=Arabidopsis thaliana GN=RPS9B PE=1 SV=1 - [RS91_ARATH]	154.36	38.38	3	5	11	31	198	23	10.17	1.058	1.001	1.081	0.977	1.023	0.982	0.994	1.04667	0.949682	0.131985
Q7DLG4	Arginyl-tRNA synthetase OS=Arabidopsis thaliana PE=3 SV=1 - [Q7DLG4_ARATH]	154.35	23.05	3	6	11	15	590	66.3	6.49	1.086	0.954	1.046	0.947	0.917	1.007	0.957	1.02867	0.930331	0.203477
Q9C8F7	Putative 60S ribosomal protein L30-1 OS=Arabidopsis thaliana GN=RPL30A PE=3 SV=1 - [RL301_ARATH]	154.07	40.18	2	1	4	10	112	12.3	9.77	1.027	1.207	1.199	0.791	0.823	0.905	0.839667	1.14433	0.733761	0.0108867
O23627	Glycine--tRNA ligase, mitochondrial 1 OS=Arabidopsis thaliana GN=At1g29880 PE=1 SV=1 - [SYGM1_ARATH]	153.66	33.33	3	6	23	34	729	81.9	7.01	0.919	0.999	0.94	1.139	1.071	1.05	1.08667	0.952667	1.14066	0.0204065
F4HWQ8	Cell wall / vacuolar inhibitor of fructosidase 1 OS=Arabidopsis thaliana GN=C/VIF1 PE=1 SV=1 - [CVIF1_ARATH]	153.27	15.61	1	2	2	4	205	22.3	8.15	0.788	0.754	0.824	1.233	1.341	1.204	1.25933	0.788667	1.59679	0.000528413
Q9C9C5	60S ribosomal protein L6-3 OS=Arabidopsis thaliana GN=RPL6C PE=2 SV=1 - [RL63_ARATH]	153.25	52.36	2	7	15	35	233	26.1	10.17	0.999	1.115	1.087	0.975	1.047	0.88	0.967333	1.067	0.906592	0.170163
O80934	Uncharacterized protein At2g37660, chloroplastic OS=Arabidopsis thaliana GN=At2g37660 PE=1 SV=2 - [Y2766_ARATH]	153.1	38.77	2	8	11	26	325	34.9	8.31	0.953	1.001	1	1.047	1.061	0.92	1.00933	0.984667	1.02505	0.6314
Q8LC83	40S ribosomal protein S24-2 OS=Arabidopsis thaliana GN=RPS24B PE=2 SV=2 - [RS242_ARATH]	152.99	32.33	1	2	5	16	133	15.4	10.52	0.957	0.989	0.986	0.994	1.024	0.905	0.974333	0.977333	0.99693	0.939534
Q8VZR2	Alpha-L-arabinofuranosidase 2 OS=Arabidopsis thaliana GN=ASD2 PE=2 SV=1 - [ASD2_ARATH]	152.95	18.55	1	10	11	19	674	75.4	5.15	1.029	1.024	1.029	1.02	0.989	0.917	0.975333	1.02733	0.949384	0.16399
Q6NL24	Probable enoyl-CoA hydratase 1, peroxisomal OS=Arabidopsis thaliana GN=ECHIA PE=1 SV=1 - [ECH1P_ARATH]	152.3	46.42	2	10	10	16	265	28.8	9.06	1.067	1.121	1.086	0.881	0.958	0.907	0.915333	1.09133	0.838729	0.00310081
O80774	AT2G34250 protein OS=Arabidopsis thaliana GN=At2g34250 PE=2 SV=1 - [O80774_ARATH]	152.16	13.68	6	7	7	17	475	52.1	9	1.012	0.996	1.007	0.911	0.904	1.07	0.961667	1.005	0.956882	0.470381
O80526	ATP-citrate synthase alpha chain protein 3 OS=Arabidopsis thaliana GN=ACLA-3 PE=2 SV=1 - [ACLA3_ARATH]	152.1	21.93	1	5	9	20	424	46.9	5.26	1.073	1.037	1.039	0.953	0.99	0.946	0.963	1.04967	0.917434	0.00849874
Q9FNA3	Alpha-N-acetylglucosaminidase OS=Arabidopsis thaliana GN=CYL1 PE=2 SV=1 - [Q9FNA3_ARATH]	151.77	18.49	3	14	14	19	806	92.6	7.53	1.011	1.079	0.988	0.998	0.994	0.954	0.982	1.026	0.957115	0.225321
Q9LMJ7	At1g07040 OS=Arabidopsis thaliana GN=F10K1.25 PE=2 SV=1 - [Q9LMJ7_ARATH]	151.61	25.07	1	7	7	10	371	40.6	8.78	0.999	0.924	1.019	1.094	0.941	1.039	1.02467	0.980667	1.04487	0.455271
Q8LPJ7	40S ribosomal protein S26-2 OS=Arabidopsis thaliana GN=RPS26B PE=2 SV=2 - [RS262_ARATH]	151.34	27.82	2	1	3	7	133	14.8	11.09	0.961	1.037	1.118	0.968	0.912	1.035	0.971667	1.03867	0.935494	0.309483
B9DFI3	AT4G37550 protein OS=Arabidopsis thaliana GN=At4g37550 PE=2 SV=1 - [B9DFI3_ARATH]	151.28	30.53	7	10	10	23	452	49.6	5.53	1.007	1.055	1.051	0.959	0.971	0.914	0.948	1.03767	0.913588	0.0180271
Q9M352	60S ribosomal protein L36-2 OS=Arabidopsis thaliana GN=RPL36B PE=2 SV=1 - [RL362_ARATH]	151.21	31.25	6	1	5	15	112	12.7	11.75	0.856	0.809	0.899	1.131	1.326	1.198	1.21833	0.854667	1.42551	0.00442754
Q9SF16	T-complex protein 1 subunit eta OS=Arabidopsis thaliana GN=CCT7 PE=1 SV=1 - [TCPH_ARATH]	150.65	30.16	1	16	16	20	557	59.7	6.39	1.055	1.082	1.052	0.951	1.004	0.882	0.945667	1.063	0.889621	0.032677
Q9LW57	Probable plastid-lipid-associated protein 6, chloroplastic OS=Arabidopsis thaliana GN=PAP6 PE=1 SV=1 - [PAP6_ARATH]	150.64	43.31	4	11	11	21	284	30.4	6.13	1.095	1.051	1.12	0.936	0.895	0.884	0.905	1.08867	0.831292	0.00200869
Q9CAR3	SNF1-related protein kinase regulatory subunit gamma-1-like OS=Arabidopsis thaliana GN=CBSCBS2 PE=1 SV=1 - [KINGL_ARATH]	150.59	40.04	2	13	13	20	447	47.8	5.34	1.11	1.135	1.043	0.913	0.926	0.862	0.900333	1.096	0.821472	0.00437838
Q949Y0	Ubiquitin carboxyl-terminal hydrolase 6 OS=Arabidopsis thaliana GN=UBP6 PE=1 SV=1 - [UBP6_ARATH]	150.38	25.31	3	10	10	17	482	53.7	6.2	0.966	0.944	0.983	1.064	1.082	1.052	1.066	0.964333	1.10543	0.00204826
P39207	Nucleoside diphosphate kinase 1 OS=Arabidopsis thaliana GN=NDK1 PE=1 SV=1 - [NDK1_ARATH]	150.35	73.15	2	11	11	29	149	16.5	6.79	1.031	1.04	1.081	0.961	0.967	0.931	0.953	1.05067	0.907043	0.0067822
P92963	Ras-related protein RABB1c OS=Arabidopsis thaliana GN=RABB1C PE=1 SV=1 - [RAB1C_ARATH]	150.33	39.34	2	4	7	12	211	23.1	7.42	0.984	1.016	0.965	1.074	0.954	1.053	1.027	0.988333	1.03912	0.387167
B0FV99	At1g04270 (Fragment) OS=Arabidopsis thaliana PE=3 SV=1 - [B0FV99_ARATH]	149.91	34.97	9	1	4	14	143	16.1	10.21	0.865	0.906	0.889	1.105	1.308	1.06	1.15767	0.886667	1.30564	0.0246663
Q9LHP1	60S ribosomal protein L7-4 OS=Arabidopsis thaliana GN=RPL7D PE=2 SV=1 - [RL74_ARATH]	149.8	48.77	6	4	13	36	244	28.4	9.95	0.991	1.042	1.043	0.969	1.005	1.001	0.991667	1.02533	0.967165	0.177612
Q9ZNT7	Prohibitin-2, mitochondrial OS=Arabidopsis thaliana GN=PHB2 PE=1 SV=1 - [PHB2_ARATH]	149.7	34.27	1	3	6	10	286	31.8	9.39	1.022	0.981	0.849	1.067	1.077	0.959	1.03433	0.950667	1.08801	0.263897
P0CZ23	Acyl-coenzyme A oxidase 3, peroxisomal OS=Arabidopsis thaliana GN=ACX3 PE=1 SV=1 - [ACOX3_ARATH]	149.23	20.3	4	10	10	13	675	75.6	7.99	0.952	0.981	0.967	0.95	1.029	0.943	0.974	0.966667	1.00759	0.811675
Q93ZG7	DEAD-box ATP-dependent RNA helicase 38 OS=Arabidopsis thaliana GN=RH38 PE=1 SV=2 - [RH38_ARATH]	148.96	21.37	2	9	9	11	496	55.3	5.29	0.97	0.986	1.048	1.004	1.015	1.027	1.01533	1.00133	1.01398	0.601084
Q9FX95	ARP protein OS=Arabidopsis thaliana GN=F14J22.10 PE=2 SV=1 - [Q9FX95_ARATH]	148.91	21.46	3	9	9	15	629	67.9	9.03	1.024	1.043	0.981	1.019	1.085	0.97	1.02467	1.016	1.00853	0.830916
C0Z2G4	AT3G63410 protein OS=Arabidopsis thaliana GN=At3g63410 PE=2 SV=1 - [C0Z2G4_ARATH]	148.37	20.79	2	5	5	12	303	34.1	9.25	1.013	1.123	1.074	0.875	0.938	0.938	0.917	1.07	0.857009	0.015952
Q9FIE8	UDP-glucuronic acid decarboxylase 3 OS=Arabidopsis thaliana GN=UXS3 PE=1 SV=1 - [UXS3_ARATH]	147.81	37.72	4	11	12	20	342	38.5	8.12	1.075	0.984	1.042	0.97	0.962	0.968	0.966667	1.03367	0.935182	0.0661435
Q9S7T8	Serpin-ZX OS=Arabidopsis thaliana GN=At1g47710 PE=1 SV=1 - [SPZX_ARATH]	147.53	28.13	1	8	8	12	391	42.6	5.08	0.972	1.084	1.041	0.944	1.005	0.866	0.938333	1.03233	0.908944	0.143707
O82628	V-type proton ATPase subunit G1 OS=Arabidopsis thaliana GN=VHA-G1 PE=2 SV=1 - [VATG1_ARATH]	147.06	72.73	1	7	7	12	110	12.4	6	0.719	0.758	0.713	1.256	1.458	1.245	1.31967	0.73	1.80776	0.00112718
Q94AM1	Organellar oligopeptidase A, chloroplastic/mitochondrial OS=Arabidopsis thaliana GN=OOP PE=1 SV=1 - [OOPDA_ARATH]	146.82	23.51	1	7	15	21	791	88.7	6.28	0.946	0.93	1.02	1.038	1.009	0.99	1.01233	0.965333	1.04869	0.204497
P52577	Isoflavone reductase homolog P3 OS=Arabidopsis thaliana GN=At1g75280 PE=2 SV=1 - [IFRH_ARATH]	146.74	35.81	6	9	10	24	310	33.7	5.94	1.074	1.057	1.07	0.891	0.913	0.926	0.91	1.067	0.852858	0.000162813
P30224	Defensin-like protein 13 OS=Arabidopsis thaliana GN=PDF1.1 PE=1 SV=3 - [DEF13_ARATH]	145.94	58.75	5	5	5	34	80	8.7	8.13	0.628	0.541	0.643	1.391	1.512	1.347	1.41667	0.604	2.34547	0.000157684
Q9FF40	Bifunctional inhibitor/lipid-transfer protein/seed storage 2S albumin superfamily protein OS=Arabidopsis thaliana GN=At5g38160 PE=2 SV=1 - [Q9FF40_ARATH]	145.86	38.83	1	4	4	9	103	10.9	7.55	1.155	0.89	1.147	1.042	0.908	0.87	0.94	1.064	0.883459	0.288772
Q9C7F5	Nuclear transport factor 2 OS=Arabidopsis thaliana GN=NTF2 PE=1 SV=1 - [NTF2_ARATH]	145.68	50	3	5	5	9	126	14	6.35	1.052	1.07	1.057	1.108	0.973	0.901	0.994	1.05967	0.938031	0.341654
Q9LZC5	GDSL esterase/lipase At5g03820 OS=Arabidopsis thaliana GN=At5g03820 PE=3 SV=1 - [GDL73_ARATH]	145.65	12.71	2	4	4	11	354	38.5	6.74	0.869	0.748	0.841	1.216	1.181	1.311	1.236	0.819333	1.50854	0.00145
Q93W22	60S ribosomal protein L10-3 OS=Arabidopsis thaliana GN=RPL10C PE=2 SV=1 - [RL103_ARATH]	145.09	45.7	5	2	11	24	221	24.9	10.56	0.955	0.936	0.937	1.031	1.15	1.087	1.08933	0.942667	1.15559	0.0136978
B3H778	Argininosuccinate synthase OS=Arabidopsis thaliana GN=At4g24830 PE=1 SV=1 - [B3H778_ARATH]	144.89	30	2	11	11	19	450	49	7.72	0.988	1.017	1.043	0.987	1.053	0.934	0.991333	1.016	0.975722	0.55074
Q9SGW3	26S proteasome non-ATPase regulatory subunit 8 homolog A OS=Arabidopsis thaliana GN=RPN12A PE=1 SV=1 - [PSD8A_ARATH]	144.64	46.44	1	9	9	14	267	30.7	4.91	1.017	1.016	1.027	0.95	1.003	1.028	0.993667	1.02	0.974183	0.32088
P49206	40S ribosomal protein S26-1 OS=Arabidopsis thaliana GN=RPS26A PE=2 SV=2 - [RS261_ARATH]	144.23	26.72	2	1	3	6	131	14.7	11.09	1.057	0.915	1.169	1.083	0.821	0.984	0.962667	1.047	0.919452	0.4708
Q9SK22	40S ribosomal protein S16-1 OS=Arabidopsis thaliana GN=RPS16A PE=2 SV=1 - [RS161_ARATH]	144.12	53.42	1	1	8	19	146	16.6	10.2	0.974	1.132	1.032	0.981	1.095	0.867	0.981	1.046	0.937859	0.464075
F4JI64	Uncharacterized protein OS=Arabidopsis thaliana GN=At4g03200 PE=4 SV=1 - [F4JI64_ARATH]	143.94	28.18	5	16	16	26	685	76.8	5.57	0.974	1.059	1.008	0.976	0.985	1.025	0.995333	1.01367	0.981914	0.560682
Q94EI1	At1g44575/T18F15 OS=Arabidopsis thaliana PE=2 SV=1 - [Q94EI1_ARATH]	143.65	25.66	3	7	7	19	265	28	9.26	1.073	1.236	1.132	0.793	0.848	0.808	0.816333	1.147	0.711712	0.00279095
O80714	Short-chain dehydrogenase reductase 3c OS=Arabidopsis thaliana GN=SDR3c PE=3 SV=1 - [SDR3C_ARATH]	143.62	25.97	4	4	6	11	258	27.2	6.35	0.885	0.783	0.928	1.079	0.942	1.385	1.13533	0.865333	1.31202	0.121697
Q75W54	Mannosylglycoprotein endo-beta-mannosidase OS=Arabidopsis thaliana GN=EBM PE=1 SV=3 - [EBM_ARATH]	142.86	23.94	1	16	16	23	944	107.6	6.46	0.982	1.05	0.955	1.011	1.002	1.039	1.01733	0.995667	1.02176	0.515117
Q9FFC0	Histone H2B.10 OS=Arabidopsis thaliana GN=At5g22880 PE=1 SV=3 - [H2B10_ARATH]	142.8	52.41	3	2	8	32	145	15.7	10.05	0.826	0.847	0.839	1.076	1.171	1.133	1.12667	0.837333	1.34554	0.000514157
Q9LUH1	Uncharacterized protein OS=Arabidopsis thaliana PE=4 SV=1 - [Q9LUH1_ARATH]	142.79	29.31	3	6	6	11	232	26	5.64	0.927	0.906	0.886	1.15	1.26	1.015	1.14167	0.906333	1.25965	0.0306085
Q8VXZ7	Alpha-galactosidase 3 OS=Arabidopsis thaliana GN=AGAL3 PE=1 SV=1 - [AGAL3_ARATH]	142.64	25.86	1	9	9	18	437	48.3	4.92	1.026	1.046	1.002	0.945	1.041	0.927	0.971	1.02467	0.947625	0.226666
Q8LBA4	Zinc-binding dehydrogenase, putative OS=Arabidopsis thaliana PE=2 SV=1 - [Q8LBA4_ARATH]	142.47	32.24	2	9	9	12	366	39.4	9.03	0.934	0.986	0.992	1	0.933	0.936	0.956333	0.970667	0.985234	0.642302
F4JQH3	Aminopeptidase P1 OS=Arabidopsis thaliana GN=APP1 PE=1 SV=1 - [F4JQH3_ARATH]	142.43	24.81	4	11	11	18	645	71.9	5.31	0.946	1.032	0.935	0.979	1.098	1.019	1.032	0.971	1.06282	0.259839
P92940	CaLB protein OS=Arabidopsis thaliana PE=2 SV=1 - [P92940_ARATH]	142.41	15.21	5	7	7	10	493	53.4	7.88	0.997	1.02	1.04	0.938	1.026	0.924	0.962667	1.019	0.944717	0.175418
Q56Z19	Fructose bisphosphate aldolase-like protein (Fragment) OS=Arabidopsis thaliana GN=At3g52930 PE=2 SV=1 - [Q56Z19_ARATH]	142.27	91.18	1	1	7	28	68	7.4	8.69	0.996	1.393	1.122	0.891	0.762	0.802	0.818333	1.17033	0.699231	0.0460329
Q9FKW8	Thiosulfate sulfurtransferase 18 OS=Arabidopsis thaliana GN=STR18 PE=1 SV=1 - [STR18_ARATH]	141.55	53.68	3	5	5	7	136	14.9	5.49	1.043	1.07	1.027	0.995	0.928	0.982	0.968333	1.04667	0.925159	0.031151
Q93XW5	Nitrile-specifier protein 5 OS=Arabidopsis thaliana GN=NSP5 PE=2 SV=1 - [NSP5_ARATH]	141.47	29.75	1	7	7	19	326	35.8	5.19	0.915	0.984	0.924	1.024	1.168	1.045	1.079	0.941	1.14665	0.0504466
Q39124	EEF-1beta protein OS=Arabidopsis thaliana GN=eEF-1beta PE=3 SV=1 - [Q39124_ARATH]	141.34	31	6	2	9	17	229	25.1	4.65	0.931	0.99	0.95	1.097	1.064	1.038	1.06633	0.957	1.11425	0.0109323
Q38946	Glutamate dehydrogenase 2 OS=Arabidopsis thaliana GN=GDH2 PE=1 SV=1 - [DHE2_ARATH]	141.31	28.47	12	5	11	29	411	44.7	6.54	0.996	1.021	0.965	1.01	1.132	0.99	1.044	0.994	1.0503	0.349549
Q9SBA5	Inositol-tetrakisphosphate 1-kinase 1 OS=Arabidopsis thaliana GN=ITPK1 PE=1 SV=1 - [ITPK1_ARATH]	141.12	33.23	1	8	8	15	319	36.2	6.47	0.877	0.83	0.785	1.092	1.307	1.085	1.16133	0.830667	1.39807	0.0130138
Q9ZPY7	Exportin-2 OS=Arabidopsis thaliana GN=CAS PE=2 SV=1 - [XPO2_ARATH]	141	10.39	1	8	8	12	972	108.6	5.59	0.979	1.068	0.967	0.976	0.936	1.041	0.984333	1.00467	0.979761	0.669176
Q9SGY2	ATP-citrate synthase alpha chain protein 1 OS=Arabidopsis thaliana GN=ACLA-1 PE=1 SV=1 - [ACLA1_ARATH]	140.95	28.61	3	3	10	22	423	46.6	5.5	0.964	0.987	1.025	0.937	1.005	0.857	0.933	0.992	0.940524	0.271745
Q9SPK5	Formate--tetrahydrofolate ligase OS=Arabidopsis thaliana GN=THFS PE=2 SV=1 - [FTHS_ARATH]	140.83	21.92	2	11	11	14	634	67.8	6.71	1.129	1.039	1.08	0.865	0.988	0.904	0.919	1.08267	0.84883	0.0214778
Q9SZE1	Probable 3-hydroxyisobutyrate dehydrogenase-like 1, mitochondrial OS=Arabidopsis thaliana GN=At4g29120 PE=1 SV=1 - [3HID1_ARATH]	140.83	35.03	1	10	10	13	334	35.3	8.4	1.038	1.036	1.086	0.968	0.912	0.913	0.931	1.05333	0.883861	0.00773145
Q9C5U3	26S protease regulatory subunit 8 homolog A OS=Arabidopsis thaliana GN=RPT6A PE=1 SV=1 - [PRS8A_ARATH]	140.77	31.26	4	10	11	23	419	47.2	8.88	1.01	1.108	1.052	0.896	1.036	0.891	0.941	1.05667	0.890536	0.104882
O22173	Polyadenylate-binding protein 4 OS=Arabidopsis thaliana GN=PAB4 PE=1 SV=1 - [PABP4_ARATH]	140.66	16.16	5	9	9	12	662	71.6	6.86	1.034	1.048	1.032	0.918	0.957	0.906	0.927	1.038	0.893064	0.00237304
Q8H7E1	Amine oxidase OS=Arabidopsis thaliana PE=2 SV=1 - [Q8H7E1_ARATH]	140.59	27.61	2	1	12	22	507	57.1	5.55	1.333	1.202	0.859	0.813	0.943	0.797	0.851	1.13133	0.75221	0.13246
F4JCI4	Alpha-galactosidase OS=Arabidopsis thaliana GN=At3g26380 PE=3 SV=1 - [F4JCI4_ARATH]	140.54	29.83	2	17	17	31	647	72.3	8.75	0.991	0.995	1.01	1.05	1.02	0.99	1.02	0.998667	1.02136	0.307575
Q7G193	Indole-3-acetaldehyde oxidase OS=Arabidopsis thaliana GN=AAO1 PE=1 SV=2 - [ALDO1_ARATH]	140.47	15.72	2	19	20	36	1368	149.5	6.4	1.005	1.033	1.04	0.992	0.996	0.953	0.980333	1.026	0.955491	0.0584373
Q8LAS8	S-formylglutathione hydrolase OS=Arabidopsis thaliana GN=SFGH PE=1 SV=2 - [SFGH_ARATH]	140.32	29.23	1	7	7	16	284	31.6	6.37	1.05	1.075	1	0.932	0.999	0.901	0.944	1.04167	0.90624	0.0549025
P24102	Peroxidase 22 OS=Arabidopsis thaliana GN=PER22 PE=1 SV=2 - [PER22_ARATH]	140.05	33.24	9	10	10	26	349	38.1	6	0.738	0.763	0.77	1.323	1.206	1.398	1.309	0.757	1.72919	0.000623586
P42770	Glutathione reductase, chloroplastic OS=Arabidopsis thaliana GN=EMB2360 PE=2 SV=1 - [GSHRP_ARATH]	139.87	21.06	2	9	9	15	565	60.8	7.87	1.098	1.056	1.088	0.907	0.944	0.894	0.915	1.08067	0.8467	0.00107669
Q8LDU4	Red chlorophyll catabolite reductase, chloroplastic OS=Arabidopsis thaliana GN=RCCR PE=1 SV=2 - [RCCR_ARATH]	139.53	31.03	17	9	9	14	319	36.4	6.04	1.07	1.017	1.036	0.974	0.928	0.925	0.942333	1.041	0.905219	0.0112533
Q84WW2	Probable 6-phosphogluconolactonase 5, chloroplastic OS=Arabidopsis thaliana GN=EMB2024 PE=2 SV=1 - [6PGL5_ARATH]	139.28	35.08	1	11	11	20	325	35.6	7.77	1.047	1.091	1.033	0.872	0.933	0.964	0.923	1.057	0.873226	0.0141012
P42798	40S ribosomal protein S15a-1 OS=Arabidopsis thaliana GN=RPS15AA PE=2 SV=2 - [R15A1_ARATH]	139.13	66.92	3	2	9	24	130	14.8	9.89	1.013	1.131	1.158	0.879	0.877	0.856	0.870667	1.10067	0.791036	0.00699718
O65396	Aminomethyltransferase, mitochondrial OS=Arabidopsis thaliana GN=GDCST PE=2 SV=1 - [GCST_ARATH]	138.73	32.35	1	12	12	22	408	44.4	8.37	0.967	0.963	0.996	0.992	1.111	1.001	1.03467	0.975333	1.06083	0.208813
Q9SJQ0	Pyruvate kinase OS=Arabidopsis thaliana GN=At2g36580 PE=2 SV=2 - [Q9SJQ0_ARATH]	138.14	29.79	3	3	13	21	527	57.5	6.35	1.104	1.008	1.031	0.977	0.917	1.005	0.966333	1.04767	0.922367	0.10457
Q38951	Serine/threonine-protein phosphatase 2A 65 kDa regulatory subunit A gamma isoform OS=Arabidopsis thaliana GN=PP2AA3 PE=1 SV=2 - [2AAG_ARATH]	137.79	20.61	2	3	9	17	587	65.5	5.07	1.167	0.994	0.933	0.983	0.868	0.966	0.939	1.03133	0.910472	0.305868
P48641	Glutathione reductase, cytosolic OS=Arabidopsis thaliana GN=At3g24170 PE=2 SV=1 - [GSHRC_ARATH]	137.47	21.44	9	11	11	15	499	53.8	6.8	1.012	1.081	1.016	0.985	0.991	0.979	0.985	1.03633	0.950466	0.0858804
O64530	Thiosulfate/3-mercaptopyruvate sulfurtransferase 1, mitochondrial OS=Arabidopsis thaliana GN=STR1 PE=1 SV=1 - [STR1_ARATH]	137.43	37.99	2	10	10	25	379	41.9	6.39	1.013	1.049	1.032	0.941	0.973	1.011	0.975	1.03133	0.945378	0.0684696
Q8LD27	Proteasome subunit beta type-6 OS=Arabidopsis thaliana GN=PBA1 PE=1 SV=2 - [PSB6_ARATH]	137.39	55.36	2	12	12	26	233	25.1	5.55	1.042	1.029	1.044	0.973	0.907	0.961	0.947	1.03833	0.912039	0.0118418
Q9SL67	26S proteasome regulatory subunit 4 homolog B OS=Arabidopsis thaliana GN=RPT2B PE=1 SV=1 - [PRS4B_ARATH]	137.34	44.02	2	14	14	21	443	49.3	6.1	1.035	1.057	1.069	0.91	0.985	0.881	0.925333	1.05367	0.878203	0.0169146
Q9FY64	40S ribosomal protein S15-4 OS=Arabidopsis thaliana GN=RPS15D PE=2 SV=1 - [RS154_ARATH]	136.81	32.89	8	1	4	14	152	17.1	10.35	0.9	0.93	0.901	1.081	1.135	0.99	1.06867	0.910333	1.17393	0.0218675
Q9FZ76	60S ribosomal protein L6-1 OS=Arabidopsis thaliana GN=RPL6A PE=2 SV=1 - [RL61_ARATH]	136.69	54.94	3	7	15	38	233	26.1	10.1	0.991	1.032	1.056	0.985	1.032	0.896	0.971	1.02633	0.946086	0.278484
Q94AZ4	Probable calcium-binding protein CML13 OS=Arabidopsis thaliana GN=CML13 PE=2 SV=1 - [CML13_ARATH]	136.46	79.73	1	4	10	20	148	16.5	4.94	0.809	0.749	0.846	1.285	1.293	1.245	1.27433	0.801333	1.59027	0.000120828
O81297	Putative uncharacterized protein AT4g02360 OS=Arabidopsis thaliana GN=T14P8.17 PE=4 SV=1 - [O81297_ARATH]	136.15	13.64	1	2	2	15	154	16.7	5.14	1.074	1.039	1.086	0.885	0.912	0.826	0.874333	1.06633	0.819944	0.00271434
Q9FMN0	Putative uncharacterized protein At5g42890 OS=Arabidopsis thaliana GN=SCP2 PE=2 SV=1 - [Q9FMN0_ARATH]	136.02	64.23	1	11	11	22	123	13.6	9.2	0.787	0.745	0.761	1.206	1.459	1.245	1.30333	0.764333	1.70519	0.00248082
Q9FKE9	Protein ROOT HAIR DEFECTIVE 3 homolog 2 OS=Arabidopsis thaliana GN=At5g45160 PE=2 SV=1 - [RHD32_ARATH]	135.94	14.63	1	10	10	12	834	93.5	6.29	0.994	1.051	0.987	0.981	1.032	0.998	1.00367	1.01067	0.993074	0.79503
O04379	Protein argonaute 1 OS=Arabidopsis thaliana GN=AGO1 PE=1 SV=1 - [AGO1_ARATH]	135.86	11.35	1	11	11	14	1048	116.1	9.29	1.05	1.029	1.062	0.895	0.942	0.936	0.924333	1.047	0.88284	0.00224628
Q1WIQ6	NADP-dependent glyceraldehyde-3-phosphate dehydrogenase OS=Arabidopsis thaliana GN=ALDH11A3 PE=1 SV=2 - [GAPN_ARATH]	135.52	36.9	3	16	16	25	496	53	6.64	1.019	1.072	1.019	0.927	0.959	0.983	0.956333	1.03667	0.922508	0.0285825
Q8GUM2	Heat shock 70 kDa protein 9, mitochondrial OS=Arabidopsis thaliana GN=HSP70-9 PE=2 SV=1 - [HSP7I_ARATH]	135.46	25.37	1	9	16	30	682	73	5.62	0.998	0.949	0.995	1.112	0.964	1.074	1.05	0.980667	1.0707	0.215186
Q941R6	MLP-like protein 31 OS=Arabidopsis thaliana GN=MLP31 PE=2 SV=2 - [MLP31_ARATH]	135.29	63.16	3	12	12	37	171	19.1	6.37	1.064	1.201	1.127	0.842	0.847	0.79	0.826333	1.13067	0.730837	0.00221255
C0Z2X0	AT4G24220 protein OS=Arabidopsis thaliana GN=At4g24220 PE=2 SV=1 - [C0Z2X0_ARATH]	134.98	40.46	2	12	12	26	351	40	5.21	0.98	1.082	1.004	1.005	0.986	0.949	0.98	1.022	0.958904	0.295213
Q9FH02	ATP-dependent zinc metalloprotease FTSH 5, chloroplastic OS=Arabidopsis thaliana GN=FTSH5 PE=1 SV=1 - [FTSH5_ARATH]	134.98	18.61	5	10	11	16	704	75.2	5.49	1.122	1.105	1.15	0.859	0.813	0.88	0.850667	1.12567	0.7557	0.000317264
P49201	40S ribosomal protein S23-2 OS=Arabidopsis thaliana GN=RPS23B PE=2 SV=2 - [RS232_ARATH]	134.38	45.07	3	6	6	18	142	15.7	10.37	0.966	1.037	1.063	0.97	1.008	0.873	0.950333	1.022	0.929876	0.221661
P16181	40S ribosomal protein S11-1 OS=Arabidopsis thaliana GN=RPS11A PE=2 SV=1 - [RS111_ARATH]	134.3	47.5	3	5	10	20	160	17.9	10.56	1.045	1.043	1.098	0.911	1.013	0.828	0.917333	1.062	0.863779	0.0624524
O49460	Prohibitin-1, mitochondrial OS=Arabidopsis thaliana GN=PHB1 PE=1 SV=1 - [PHB1_ARATH]	134.25	44.1	2	5	10	16	288	31.7	9.26	1.073	0.945	1.051	1.006	0.887	1.033	0.975333	1.023	0.953405	0.46984
Q9SD46	Peroxidase 36 OS=Arabidopsis thaliana GN=PER36 PE=2 SV=2 - [PER36_ARATH]	134.2	19.77	1	5	5	13	344	38.2	5.05	1.099	1.055	1.07	0.97	0.962	0.877	0.936333	1.07467	0.871278	0.0130064
Q9M885	40S ribosomal protein S7-2 OS=Arabidopsis thaliana GN=RPS7B PE=2 SV=1 - [RS72_ARATH]	134.09	41.36	1	4	6	14	191	22.2	9.77	0.954	1.054	0.932	1.129	1.03	1.072	1.077	0.98	1.09898	0.109315
Q7G191	Benzaldehyde dehydrogenase (NAD(+)) OS=Arabidopsis thaliana GN=AAO4 PE=1 SV=2 - [ALDO4_ARATH]	133.85	12.27	3	12	13	18	1337	147.2	6.33	0.944	0.95	0.97	1.103	1.034	1.098	1.07833	0.954667	1.12954	0.00630447
P42799	Glutamate-1-semialdehyde 2,1-aminomutase 1, chloroplastic OS=Arabidopsis thaliana GN=GSA1 PE=2 SV=1 - [GSA1_ARATH]	133.74	16.46	2	6	6	8	474	50.3	6.87	0.982	1.039	1.025	0.992	0.924	1.04	0.985333	1.01533	0.970453	0.471491
Q9ZT91	Elongation factor Tu, mitochondrial OS=Arabidopsis thaliana GN=TUFA PE=1 SV=1 - [EFTM_ARATH]	133.26	51.1	1	17	19	35	454	49.4	6.7	0.971	1.006	1.014	1.059	1.053	0.948	1.02	0.997	1.02307	0.58132
P46421	Glutathione S-transferase U5 OS=Arabidopsis thaliana GN=GSTU5 PE=2 SV=1 - [GSTU5_ARATH]	133.23	38.39	4	8	8	14	224	26	5.55	1.051	1.09	1.064	0.89	0.988	0.959	0.945667	1.06833	0.885179	0.0171605
Q8RWN9	Dihydrolipoyllysine-residue acetyltransferase component 2 of pyruvate dehydrogenase complex, mitochondrial OS=Arabidopsis thaliana GN=At3g13930 PE=2 SV=2 - [ODP22_ARATH]	132.8	15.4	2	8	8	11	539	58.4	7.65	1.009	0.959	1.008	0.942	1.049	1.028	1.00633	0.992	1.01445	0.715726
Q38884	Eukaryotic translation initiation factor 3 subunit I OS=Arabidopsis thaliana GN=TIF3I1 PE=2 SV=2 - [EIF3I_ARATH]	132.53	39.33	8	11	11	20	328	36.4	6.99	0.842	0.839	0.9	1.183	1.2	1.118	1.167	0.860333	1.35645	0.000655599
O81439	Probable plastid-lipid-associated protein 1, chloroplastic OS=Arabidopsis thaliana GN=PAP1 PE=1 SV=1 - [PAP1_ARATH]	132.38	28.93	1	7	8	10	318	34.9	5.6	1.076	1.01	1.078	0.952	0.959	0.935	0.948667	1.05467	0.899494	0.0106558
Q9ZUB3	Spermidine synthase 1 OS=Arabidopsis thaliana GN=SPDSYN1 PE=1 SV=1 - [SPD1_ARATH]	132.28	28.14	2	4	7	17	334	36.5	4.86	0.984	1.035	1.039	1.025	1.065	0.943	1.011	1.01933	0.991825	0.845279
Q9M9W5	Alpha/beta-Hydrolases superfamily protein OS=Arabidopsis thaliana GN=F18C1.13 PE=2 SV=1 - [Q9M9W5_ARATH]	131.9	38.37	1	12	12	16	331	37.2	5.68	1.078	1.064	1.079	0.888	1.006	0.879	0.924333	1.07367	0.860913	0.0222687
P38605	Cycloartenol synthase OS=Arabidopsis thaliana GN=CAS1 PE=1 SV=2 - [CAS1_ARATH]	131.58	16.6	3	10	10	13	759	86	6.09	1.065	1.035	1.036	0.968	0.956	0.951	0.958333	1.04533	0.916773	0.00140932
Q8GWR2	Oil body-associated protein 1B OS=Arabidopsis thaliana GN=OBAP1B PE=1 SV=1 - [OBP1B_ARATH]	131.29	31.95	1	5	6	10	241	26.7	6.09	1.057	1.129	1.106	0.895	0.815	0.775	0.828333	1.09733	0.75486	0.00283555
Q9SIL6	Prohibitin-6, mitochondrial OS=Arabidopsis thaliana GN=PHB6 PE=1 SV=1 - [PHB6_ARATH]	131.01	23.78	1	1	5	8	286	31.6	9.64	1.011	1.041	1.1	0.921	1.056	0.899	0.958667	1.05067	0.912437	0.17338
Q9ASV5	AT4g39690/T19P19_80 OS=Arabidopsis thaliana GN=At4g39690 PE=2 SV=1 - [Q9ASV5_ARATH]	130.96	13.38	3	6	7	12	650	70.5	5.2	1.07	1.11	1.055	0.896	0.895	1.015	0.935333	1.07833	0.867388	0.0294031
Q8LF48	3-ketoacyl-CoA thiolase 1, peroxisomal OS=Arabidopsis thaliana GN=KAT1 PE=2 SV=2 - [THIK1_ARATH]	130.77	16.25	1	3	6	14	443	46.6	8.29	0.887	0.947	0.921	1.271	0.937	1.115	1.10767	0.918333	1.20617	0.12564
Q9LS94	Ras-related protein RABG3f OS=Arabidopsis thaliana GN=RABG3F PE=2 SV=1 - [RAG3F_ARATH]	130.73	48.54	5	4	9	18	206	23.1	5.08	1.016	1.097	1.006	0.912	0.929	0.973	0.938	1.03967	0.902212	0.0405594
P49063	Exopolygalacturonase clone GBGA483 OS=Arabidopsis thaliana GN=At3g07850 PE=2 SV=2 - [PGLR2_ARATH]	129.66	28.15	6	10	10	15	444	45.6	8.31	1.055	1.093	1.114	0.955	0.814	0.875	0.881333	1.08733	0.810546	0.00968117
Q8LA49	Globulin-like protein OS=Arabidopsis thaliana PE=2 SV=1 - [Q8LA49_ARATH]	129.55	25	4	8	8	9	356	38.3	6.18	1.101	1.071	1.122	0.913	1.042	0.811	0.922	1.098	0.839709	0.0619096
F4JRV2	Superoxide dismutase OS=Arabidopsis thaliana GN=FSD1 PE=3 SV=1 - [F4JRV2_ARATH]	129.48	20.97	2	5	5	19	186	21.1	6.64	1.028	1.033	1.024	0.988	1.066	0.929	0.994333	1.02833	0.966937	0.440679
Q9C7D6	Serine carboxypeptidase-like 17 OS=Arabidopsis thaliana GN=SCPL17 PE=2 SV=1 - [SCP17_ARATH]	129.47	19.45	10	8	8	14	437	49.5	6.84	1.097	1.151	1.153	0.911	0.807	0.852	0.856667	1.13367	0.75566	0.00141846
Q9M1X2	Fatty-acid-binding protein 1 OS=Arabidopsis thaliana GN=FAP1 PE=1 SV=1 - [FAP1_ARATH]	129.3	29.39	3	8	8	14	279	30.4	7.49	1.085	1.135	1.112	0.892	0.972	0.848	0.904	1.11067	0.813926	0.00612739
Q0WWW1	Glycyl-tRNA synthetase (Fragment) OS=Arabidopsis thaliana GN=At1g29880 PE=2 SV=1 - [Q0WWW1_ARATH]	129.19	36.8	3	1	18	25	519	58.1	5.99	NA	NA	NA	NA	NA	NA	NA	NA	NA	NA
Q9LMU2	At1g17860/F2H15_8 OS=Arabidopsis thaliana GN=F2H15.9 PE=2 SV=1 - [Q9LMU2_ARATH]	128.98	48.47	1	8	8	21	196	22.1	8.78	0.622	0.578	0.652	1.463	1.592	1.392	1.48233	0.617333	2.40119	0.00015659
Q9M328	AT3G53990 protein OS=Arabidopsis thaliana GN=F5K20_290 PE=2 SV=1 - [Q9M328_ARATH]	128.95	56.88	2	10	10	22	160	17.8	5.94	1.02	1.074	1.143	0.903	0.932	0.861	0.898667	1.079	0.83287	0.0118347
Q41914	Defensin-like protein 4 OS=Arabidopsis thaliana GN=PDF2.1 PE=2 SV=2 - [DEF04_ARATH]	128.78	28.57	1	1	1	3	77	8.6	8.72	1.26	0.777	1.295	0.876	0.933	0.801	0.87	1.11067	0.783313	0.233084
Q9M2N5	Zinc finger BED domain-containing protein DAYSLEEPER OS=Arabidopsis thaliana GN=HAT PE=1 SV=1 - [DSLE_ARATH]	128.27	23.28	1	13	13	18	696	78.8	5.35	1.016	1.003	1.044	0.964	0.95	0.97	0.961333	1.021	0.941561	0.011426
F4KE21	Chloroplastic acetylcoenzyme A carboxylase 1 OS=Arabidopsis thaliana GN=CAC1 PE=4 SV=1 - [F4KE21_ARATH]	127.91	25.59	3	5	7	15	254	26.9	9.54	1.049	1.108	1.104	0.916	0.919	0.821	0.885333	1.087	0.814474	0.00571481
Q9LFA3	Monodehydroascorbate reductase 1, peroxisomal OS=Arabidopsis thaliana GN=MDAR1 PE=1 SV=1 - [MDAR1_ARATH]	127.53	22.81	2	7	7	9	434	46.5	6.83	1.036	0.973	1.029	0.957	1	1.041	0.999333	1.01267	0.986833	0.692893
Q9XIF8	Glutathione S-transferase U16 OS=Arabidopsis thaliana GN=GSTU16 PE=2 SV=1 - [GSTUG_ARATH]	127.34	23.5	4	4	6	10	234	26.5	5.58	1.108	1.073	1.112	1.007	0.858	0.826	0.897	1.09767	0.817188	0.0246165
Q8W0Z7	Branched-chain-amino-acid aminotransferase-like protein 1 OS=Arabidopsis thaliana GN=At3g05190 PE=2 SV=1 - [BCAL1_ARATH]	127.24	27.39	3	13	13	16	555	62.2	6.89	1.143	1.081	1.091	0.917	0.853	0.888	0.886	1.105	0.80181	0.00119989
Q9SSB5	26S protease regulatory subunit 7 homolog A OS=Arabidopsis thaliana GN=RPT1A PE=1 SV=1 - [PRS7A_ARATH]	127.13	51.17	6	19	19	27	426	47.8	6.65	0.973	1.034	0.995	1.062	1.004	0.996	1.02067	1.00067	1.01999	0.505829
Q8LDH6	Putative thaumatin OS=Arabidopsis thaliana GN=At2g28790 PE=2 SV=1 - [Q8LDH6_ARATH]	127.05	25.7	2	6	6	14	249	27	7.65	0.954	0.849	0.896	1.078	1.129	1.089	1.09867	0.899667	1.22119	0.00429326
Q9LTU5	DNA-damage inducible protein DDI1-like OS=Arabidopsis thaliana PE=4 SV=1 - [Q9LTU5_ARATH]	127.04	29.11	4	7	7	10	395	43.3	5	0.996	1.008	0.934	0.971	1.036	1.025	1.01067	0.979333	1.03199	0.362093
Q9SS61	At3g03590 OS=Arabidopsis thaliana GN=T12J13.13 PE=2 SV=1 - [Q9SS61_ARATH]	126.92	61.54	2	9	9	16	143	15.3	10.2	0.912	0.945	0.809	1.122	1.215	1.082	1.13967	0.888667	1.28245	0.01154
F4JHJ0	HSP20-like chaperone OS=Arabidopsis thaliana GN=At4g02450 PE=1 SV=1 - [F4JHJ0_ARATH]	126.86	32.5	4	9	9	17	240	25.3	4.56	1.059	1.056	1.089	0.875	0.96	0.873	0.902667	1.068	0.845194	0.00564526
Q681P6	Putative uncharacterized protein At5g46230 OS=Arabidopsis thaliana GN=At5g46230 PE=2 SV=1 - [Q681P6_ARATH]	126.76	33.57	2	4	4	9	143	16.2	7.39	0.899	1.037	0.877	1.066	1.074	1.04	1.06	0.937667	1.13047	0.0748881
Q949P2	Probable cytosolic oligopeptidase A OS=Arabidopsis thaliana GN=CYOP PE=1 SV=1 - [COPDA_ARATH]	126.74	24.39	1	7	15	22	701	79	5.63	0.989	1.024	1.026	1.022	1.024	0.968	1.00467	1.013	0.991774	0.723223
Q93VS8	Protein EMBRYO DEFECTIVE 2734 OS=Arabidopsis thaliana GN=emb2734 PE=2 SV=1 - [Q93VS8_ARATH]	126.43	9.14	1	8	8	10	1116	123.7	4.87	1.085	1.04	0.934	0.951	1.046	0.896	0.964333	1.01967	0.945734	0.426892
Q9FK25	Flavone 3'-O-methyltransferase 1 OS=Arabidopsis thaliana GN=OMT1 PE=1 SV=1 - [OMT1_ARATH]	126.02	18.73	1	5	5	7	363	39.6	5.95	0.856	0.831	0.828	1.119	1.327	1.215	1.22033	0.838333	1.45567	0.00326838
Q84M96	Probable aldo-keto reductase 2 OS=Arabidopsis thaliana GN=AGD2 PE=2 SV=1 - [ALKR2_ARATH]	125.87	29.19	5	5	11	16	346	38.2	6.38	1.086	1.195	1.168	0.941	0.82	0.833	0.864667	1.14967	0.752102	0.00483542
P42036	40S ribosomal protein S14-3 OS=Arabidopsis thaliana GN=RPS14C PE=2 SV=2 - [RS143_ARATH]	125.48	38.67	1	1	6	14	150	16.2	10.59	0.939	0.869	0.998	1.064	1.193	1.047	1.10133	0.935333	1.17748	0.0488134
P25864	50S ribosomal protein L9, chloroplastic OS=Arabidopsis thaliana GN=RPL9 PE=2 SV=1 - [RK9_ARATH]	125.12	47.21	1	9	9	14	197	22.1	9.67	0.945	0.948	0.915	1.043	1.084	1.109	1.07867	0.936	1.15242	0.00288294
A0SVJ6	DOG1 alpha splice variant OS=Arabidopsis thaliana GN=DOG1 PE=4 SV=1 - [A0SVJ6_ARATH]	125	20.96	11	4	4	6	291	32.5	5.35	1.001	1.018	1.04	0.933	1.075	0.958	0.988667	1.01967	0.969598	0.530485
Q8VZB9	60S ribosomal protein L10a-1 OS=Arabidopsis thaliana GN=RPL10AA PE=1 SV=1 - [R10A1_ARATH]	124.99	48.15	1	3	12	32	216	24.5	9.88	1.09	1.127	1.118	0.887	0.936	0.848	0.890333	1.11167	0.8009	0.00134627
Q9FNN1	Pyruvate kinase OS=Arabidopsis thaliana GN=At5g08570 PE=2 SV=1 - [Q9FNN1_ARATH]	124.38	24.9	3	11	11	15	510	54.9	6.29	1.024	1.091	1.061	0.931	0.957	0.947	0.945	1.05867	0.892632	0.00545628
Q8RWZ3	Probable acyl-CoA dehydrogenase IBR3 OS=Arabidopsis thaliana GN=IBR3 PE=1 SV=1 - [IBR3_ARATH]	124.38	11.89	1	8	8	9	824	91.7	8.32	1.024	1.022	1.011	1.005	0.981	0.998	0.994667	1.019	0.97612	0.0411309
F4JR37	Putative lipid transfer protein OS=Arabidopsis thaliana GN=At4g30880 PE=4 SV=1 - [F4JR37_ARATH]	124.06	46.79	2	6	6	18	109	11.5	8.32	1.068	0.988	1.043	0.97	1.009	0.981	0.986667	1.033	0.955147	0.153232
O23523	AT4g16830/dl4440w OS=Arabidopsis thaliana GN=dl4440w PE=1 SV=1 - [O23523_ARATH]	123.8	20.28	4	5	6	14	355	37.4	8.06	0.82	0.769	0.805	1.236	1.267	1.28	1.261	0.798	1.5802	2.05648e-05
O82326	Expressed protein OS=Arabidopsis thaliana GN=At2g14880 PE=1 SV=1 - [O82326_ARATH]	123.11	51.06	3	3	8	20	141	15.9	9.86	0.704	0.652	0.764	1.348	1.195	1.436	1.32633	0.706667	1.87689	0.0013259
Q9LHG9	Nascent polypeptide-associated complex subunit alpha-like protein 1 OS=Arabidopsis thaliana GN=At3g12390 PE=1 SV=1 - [NACA1_ARATH]	122.99	34.48	2	5	5	9	203	22	4.48	0.991	1.099	1.123	0.954	0.874	0.896	0.908	1.071	0.847806	0.025781
Q8L8Y7	Putative uncharacterized protein OS=Arabidopsis thaliana PE=2 SV=1 - [Q8L8Y7_ARATH]	122.66	26.95	2	4	5	10	167	19.4	9.38	1.026	1.017	1.05	1.037	0.973	1.026	1.012	1.031	0.981571	0.437947
Q9M9W1	60S ribosomal protein L22-2 OS=Arabidopsis thaliana GN=RPL22B PE=2 SV=1 - [RL222_ARATH]	122.32	59.68	1	3	7	22	124	14	9.55	1.008	1.013	1.076	0.913	0.99	0.961	0.954667	1.03233	0.924766	0.0684072
Q39168	UPF0540 protein At1g62000 OS=Arabidopsis thaliana GN=At1g62000 PE=2 SV=1 - [U540A_ARATH]	122.09	27.03	1	2	2	3	148	14.9	10.43	0.636	0.674	0.691	1.402	1.383	1.405	1.39667	0.667	2.09395	2.04951e-06
O64631	At2g45510 OS=Arabidopsis thaliana GN=CYP704A2 PE=2 SV=1 - [O64631_ARATH]	122.03	22.11	8	9	10	20	511	59	6.99	0.951	1.015	1.01	0.977	1.023	1.046	1.01533	0.992	1.02352	0.464363
Q9SRX2	60S ribosomal protein L19-1 OS=Arabidopsis thaliana GN=RPL19A PE=2 SV=1 - [RL191_ARATH]	121.67	31.78	3	4	5	15	214	24.6	11.36	0.902	0.897	0.924	1.082	1.171	1.115	1.12267	0.907667	1.23687	0.00139904
Q9SEL6	Vesicle transport v-SNARE 11 OS=Arabidopsis thaliana GN=VTI11 PE=1 SV=2 - [VTI11_ARATH]	121.01	17.19	3	3	3	6	221	24.9	9.44	1.013	1.003	0.972	0.99	1.021	0.983	0.998	0.996	1.00201	0.911968
Q949W8	Putative xylulose kinase OS=Arabidopsis thaliana GN=XK-2 PE=2 SV=1 - [Q949W8_ARATH]	120.81	19	3	7	7	11	558	61.3	5.53	0.927	0.955	0.955	1.092	1.083	1.103	1.09267	0.945667	1.15545	0.000180001
A0A090MHY5	Glucose-6-phosphate isomerase OS=Arabidopsis thaliana GN=PGI1 (At4g24620) PE=2 SV=1 - [A0A090MHY5_ARATH]	120.75	25.86	2	14	14	21	611	66.8	5.6	1.055	1.151	1.089	0.905	0.86	0.889	0.884667	1.09833	0.805463	0.00233299
Q84WM9	Elongation factor 1-beta 1 OS=Arabidopsis thaliana GN=At5g12110 PE=2 SV=2 - [EF1B1_ARATH]	120.31	26.32	5	1	6	13	228	24.8	4.69	0.928	1.009	0.92	1.101	1.062	1.084	1.08233	0.952333	1.13651	0.0131561
Q9SHP0	Phosphoserine aminotransferase 2, chloroplastic OS=Arabidopsis thaliana GN=PSAT2 PE=1 SV=1 - [SERB2_ARATH]	120.3	24.41	1	2	8	15	422	46.6	8.06	0.961	0.904	0.979	1.052	1.142	1.045	1.07967	0.948	1.13889	0.0269014
Q9FKX3	Uncharacterized protein OS=Arabidopsis thaliana GN=At5g66090 PE=2 SV=1 - [Q9FKX3_ARATH]	120.28	36.19	2	7	7	11	210	22.5	6.7	1.002	1.065	1.029	1.065	1.011	0.96	1.012	1.032	0.98062	0.602112
Q9ASZ9	Probable aldo-keto reductase 5 OS=Arabidopsis thaliana GN=At1g60730 PE=2 SV=1 - [ALKR5_ARATH]	120.18	32.75	4	6	11	16	345	37.8	6.3	0.98	0.948	0.931	1.078	1.063	1.019	1.05333	0.953	1.10528	0.0116835
Q93W03	AT3g56130/F18O21_90 OS=Arabidopsis thaliana GN=At3g56130 PE=2 SV=1 - [Q93W03_ARATH]	120.09	45.91	4	9	9	15	281	29.6	8.72	0.881	0.853	0.91	1.167	1.264	1.033	1.15467	0.881333	1.31014	0.0166272
Q8LGI2	Probable mitochondrial saccharopine dehydrogenase-like oxidoreductase At5g39410 OS=Arabidopsis thaliana GN=At5g39410 PE=1 SV=2 - [SCPDL_ARATH]	119.79	33.26	3	12	12	19	454	49.6	8.29	1.033	1.058	1.08	0.919	0.816	0.93	0.888333	1.057	0.840429	0.0121436
Q9M084	Aspartate--tRNA ligase 2, cytoplasmic OS=Arabidopsis thaliana GN=IBI1 PE=1 SV=1 - [SYDC2_ARATH]	119.47	28.32	1	13	15	20	558	62.9	6.23	1.029	1.023	0.986	0.971	1.017	0.973	0.987	1.01267	0.974654	0.271767
Q9SW96	Asparagine--tRNA ligase, cytoplasmic 1 OS=Arabidopsis thaliana GN=SYNC1 PE=1 SV=1 - [SYNC1_ARATH]	119.37	21.33	2	8	12	14	572	63.7	5.58	1.06	1.046	1.056	0.971	0.966	0.945	0.960667	1.054	0.911448	0.000485519
Q9FJP9	Succinate dehydrogenase [ubiquinone] iron-sulfur subunit 3, mitochondrial OS=Arabidopsis thaliana GN=SDH2-3 PE=1 SV=1 - [SDHB3_ARATH]	118.91	22.33	1	7	7	12	309	35	8.84	1.009	1.027	0.996	0.994	1.102	1.004	1.03333	1.01067	1.02243	0.559009
Q38845	Serine/threonine-protein phosphatase 2A 65 kDa regulatory subunit A alpha isoform OS=Arabidopsis thaliana GN=PP2AA1 PE=1 SV=1 - [2AAA_ARATH]	118.58	10.54	1	2	5	7	588	65.5	5.07	0.927	0.84	0.942	1.074	1.267	1.034	1.125	0.903	1.24585	0.047695
B9DFQ9	AT5G37510 protein OS=Arabidopsis thaliana GN=EMB1467 PE=2 SV=1 - [B9DFQ9_ARATH]	118.57	19.46	3	11	11	14	745	81.1	6.64	0.951	1.012	0.981	0.983	0.969	1.075	1.009	0.981333	1.02819	0.502899
Q8LDW8	Probable hydroxyacylglutathione hydrolase 2, chloroplastic OS=Arabidopsis thaliana GN=GLX2-4 PE=2 SV=1 - [GLO2D_ARATH]	118.53	18.13	1	4	4	6	331	36.6	8.12	0.893	0.956	0.889	1.057	1.224	1.181	1.154	0.912667	1.26443	0.0114839
P20649	ATPase 1, plasma membrane-type OS=Arabidopsis thaliana GN=AHA1 PE=1 SV=3 - [PMA1_ARATH]	117.68	17.07	10	4	14	17	949	104.2	6.7	0.917	1.055	0.961	1.089	0.902	1.092	1.02767	0.977667	1.05114	0.540793
Q8LF32	Aspartyl aminopeptidase-like protein OS=Arabidopsis thaliana PE=2 SV=1 - [Q8LF32_ARATH]	117.62	7.13	2	2	2	3	477	52.5	6.77	0.985	0.956	1	0.984	0.998	0.991	0.991	0.980333	1.01088	0.474632
Q0WW26	Coatomer subunit gamma OS=Arabidopsis thaliana GN=At4g34450 PE=1 SV=2 - [COPG_ARATH]	117.24	22.35	1	18	18	24	886	98.4	5.16	1.018	1.061	1.066	0.929	0.967	0.974	0.956667	1.04833	0.91256	0.0113939
Q9ZPV8	Phosphopantetheine adenylyltransferase OS=Arabidopsis thaliana GN=COAD PE=1 SV=1 - [COAD_ARATH]	117.14	22.73	1	3	3	6	176	19.2	6.6	0.869	0.899	0.927	1.168	1.121	1.065	1.118	0.898333	1.24453	0.00300687
P56765	Acetyl-coenzyme A carboxylase carboxyl transferase subunit beta, chloroplastic OS=Arabidopsis thaliana GN=accD PE=1 SV=2 - [ACCD_ARATH]	117.14	27.05	6	13	13	18	488	55.6	6.24	1.063	1.128	1.108	0.908	0.901	0.88	0.896333	1.09967	0.815095	0.000634519
Q8L972	Putative uncharacterized protein OS=Arabidopsis thaliana PE=2 SV=1 - [Q8L972_ARATH]	116.77	28.36	3	7	7	9	335	37.4	8.05	1.016	0.943	0.968	1.022	1	1.059	1.027	0.975667	1.05261	0.135132
Q38922	Ras-related protein RABB1b OS=Arabidopsis thaliana GN=RABB1B PE=2 SV=1 - [RAB1B_ARATH]	116.36	39.81	2	4	7	11	211	23.2	7.01	0.891	0.884	0.994	1.229	1.083	1.074	1.12867	0.923	1.22282	0.0287893
Q9C7F4	AT1G27990 protein OS=Arabidopsis thaliana GN=F13K9.9 PE=2 SV=1 - [Q9C7F4_ARATH]	116.22	20.3	2	5	5	12	271	29.7	9.67	0.964	1.125	0.942	0.983	1.058	0.853	0.964667	1.01033	0.9548	0.612072
O80837	Remorin OS=Arabidopsis thaliana GN=DBP PE=1 SV=1 - [REMO_ARATH]	116.01	44.74	1	8	10	18	190	21	8.54	0.691	0.779	0.727	1.307	1.452	1.261	1.34	0.732333	1.82977	0.000644856
Q8LB67	Putative uncharacterized protein OS=Arabidopsis thaliana PE=2 SV=1 - [Q8LB67_ARATH]	115.76	30.89	4	6	6	11	259	27.2	5.63	0.901	0.989	0.954	1.051	1.102	0.96	1.03767	0.948	1.09459	0.139869
Q9ZUF6	Subtilisin-like protease SBT1.8 OS=Arabidopsis thaliana GN=SBT1.8 PE=2 SV=1 - [SBT18_ARATH]	115.75	18.17	2	7	7	7	754	80	8.35	1.015	1.083	1.034	0.926	1.022	0.881	0.943	1.044	0.903257	0.0943593
F4I4Z2	Alanine--tRNA ligase OS=Arabidopsis thaliana GN=ALATS PE=1 SV=1 - [F4I4Z2_ARATH]	115.4	18.17	2	15	15	23	963	105.9	5.88	1.016	1.009	1.016	0.978	1.024	0.925	0.975667	1.01367	0.962512	0.25605
Q8LBK6	Monothiol glutaredoxin-S15, mitochondrial OS=Arabidopsis thaliana GN=GRXS15 PE=1 SV=2 - [GRS15_ARATH]	115.27	30.77	1	4	4	9	169	18.7	6.33	0.861	0.771	0.771	1.202	1.285	1.321	1.26933	0.801	1.58469	0.000536528
Q39221	SEC12-like protein 2 OS=Arabidopsis thaliana GN=STL2P PE=1 SV=4 - [STLP2_ARATH]	115.23	30.03	1	8	8	9	393	42.8	5.64	1.002	0.949	1.014	0.907	1.038	1.046	0.997	0.988333	1.00877	0.868959
Q39230	Serine--tRNA ligase, cytoplasmic OS=Arabidopsis thaliana GN=At5g27470 PE=2 SV=1 - [SYSC_ARATH]	115.2	23.28	1	11	11	16	451	51.6	6.67	1.022	1.066	1.023	0.936	0.954	0.944	0.944667	1.037	0.910961	0.00390138
P51407	60S acidic ribosomal protein P2-1 OS=Arabidopsis thaliana GN=RPP2A PE=2 SV=2 - [RLA21_ARATH]	114.7	64.35	3	3	5	18	115	11.4	4.61	0.907	0.875	0.945	1.137	1.052	1.087	1.092	0.909	1.20132	0.00457431
O82662	Succinyl-CoA ligase [ADP-forming] subunit beta, mitochondrial OS=Arabidopsis thaliana GN=At2g20420 PE=1 SV=1 - [SUCB_ARATH]	114.49	35.63	3	16	16	32	421	45.3	6.71	0.99	0.996	1.017	0.979	1.015	1.002	0.998667	1.001	0.997669	0.869581
Q8LCY6	Putative uncharacterized protein OS=Arabidopsis thaliana PE=2 SV=1 - [Q8LCY6_ARATH]	114.45	28.24	2	3	3	8	131	15	8.4	0.847	0.799	0.864	1.186	1.274	1.143	1.201	0.836667	1.43546	0.00108129
Q8VZC3	Delta-1-pyrroline-5-carboxylate dehydrogenase 12A1, mitochondrial OS=Arabidopsis thaliana GN=ALDH12A1 PE=2 SV=1 - [AL121_ARATH]	114.36	24.64	1	13	13	28	556	61.7	6.73	1.021	1.063	1.014	0.946	0.978	0.951	0.958333	1.03267	0.928018	0.0151715
Q9SDM9	Nitrile-specifier protein 1 OS=Arabidopsis thaliana GN=NSP1 PE=2 SV=2 - [JAL28_ARATH]	114.31	9.15	5	1	4	17	470	51.6	5.53	1.098	0.879	0.911	0.978	1.148	1.055	1.06033	0.962667	1.10145	0.310292
Q9ZPW9	Non-specific lipid-transfer protein 8 OS=Arabidopsis thaliana GN=LTP8 PE=3 SV=1 - [NLTP8_ARATH]	114.27	50	1	4	4	18	116	11.8	5.25	0.545	0.562	0.627	1.457	1.786	1.447	1.56333	0.578	2.70473	0.000990089
Q96299	14-3-3-like protein GF14 mu OS=Arabidopsis thaliana GN=GRF9 PE=1 SV=2 - [14339_ARATH]	114.24	42.21	10	10	12	24	263	29.5	4.91	1.017	0.946	1.018	0.971	1.052	0.972	0.998333	0.993667	1.0047	0.902827
Q9FJZ7	AT5G66420 protein OS=Arabidopsis thaliana GN=At5g66420 PE=2 SV=1 - [Q9FJZ7_ARATH]	114.14	16.98	3	10	10	12	754	80.7	5.73	0.953	0.971	0.976	1.012	1.033	1.051	1.032	0.966667	1.06759	0.00788526
Q9LE22	Probable calcium-binding protein CML27 OS=Arabidopsis thaliana GN=CML27 PE=1 SV=1 - [CML27_ARATH]	114.08	38.24	1	5	5	12	170	18.3	4.35	0.921	1.014	0.884	1.041	1.14	0.969	1.05	0.939667	1.11742	0.154116
Q9LPZ1	Multiple organellar RNA editing factor 9, chloroplastic OS=Arabidopsis thaliana GN=MORF9 PE=1 SV=1 - [MORF9_ARATH]	113.81	17.67	1	2	2	4	232	26.2	8.88	0.981	0.926	0.941	1.029	1.126	0.985	1.04667	0.949333	1.10253	0.0953667
Q9S9P1	40S ribosomal protein S12-1 OS=Arabidopsis thaliana GN=RPS12A PE=2 SV=1 - [RS121_ARATH]	113.66	53.47	1	5	7	16	144	15.4	5.55	1.175	1.139	1.199	0.741	0.831	0.836	0.802667	1.171	0.685454	0.000484561
Q9CAI3	Probable cinnamyl alcohol dehydrogenase 1 OS=Arabidopsis thaliana GN=CAD1 PE=2 SV=1 - [CADH1_ARATH]	113.18	37.75	2	10	11	36	355	38.6	7.12	0.91	1.011	0.934	1.07	1.057	1.056	1.061	0.951667	1.11489	0.0237954
Q9LHI0	NADH dehydrogenase [ubiquinone] 1 alpha subcomplex subunit 6 OS=Arabidopsis thaliana GN=At3g12260 PE=2 SV=1 - [NDUA6_ARATH]	113.11	58.65	1	7	7	18	133	15.1	9.09	0.753	0.741	0.743	1.394	1.357	1.294	1.34833	0.745667	1.80823	3.35657e-05
Q9FFC6	GDSL esterase/lipase At5g22810 OS=Arabidopsis thaliana GN=At5g22810 PE=3 SV=3 - [GDL78_ARATH]	112.79	30.66	1	8	8	22	362	39.5	6.21	0.984	0.91	0.983	1.027	1.1	1.046	1.05767	0.959	1.10288	0.0397654
Q9C550	2-isopropylmalate synthase 2, chloroplastic OS=Arabidopsis thaliana GN=IPMS2 PE=1 SV=1 - [LEU12_ARATH]	112.62	16.01	5	8	9	11	631	68.1	6.37	0.984	1	0.934	1.049	1.082	1.009	1.04667	0.972667	1.07608	0.0631446
Q38931	Peptidyl-prolyl cis-trans isomerase FKBP62 OS=Arabidopsis thaliana GN=FKBP62 PE=1 SV=2 - [FKB62_ARATH]	112.23	19.42	3	11	11	20	551	61.4	5.31	0.987	0.997	1.074	0.958	1.009	0.981	0.982667	1.01933	0.964029	0.304969
Q9SA18	Bifunctional aspartokinase/homoserine dehydrogenase 1, chloroplastic OS=Arabidopsis thaliana GN=AKHSDH1 PE=1 SV=1 - [AKH1_ARATH]	112.22	7.68	1	4	5	5	911	99.3	6.77	1.103	0.991	1.081	0.978	0.788	1.03	0.932	1.05833	0.88063	0.19445
Q9STE8	Protein TOC75-3, chloroplastic OS=Arabidopsis thaliana GN=TOC75-3 PE=1 SV=1 - [TC753_ARATH]	112.16	20.29	2	13	13	15	818	89.1	8.79	0.984	0.966	0.971	1.031	1.005	1.003	1.013	0.973667	1.0404	0.0199749
Q9FMU6	Mitochondrial phosphate carrier protein 3, mitochondrial OS=Arabidopsis thaliana GN=MPT3 PE=2 SV=1 - [MPCP3_ARATH]	111.58	21.07	2	8	8	16	375	40.1	9.2	1.016	1.117	1.028	0.917	0.955	0.927	0.933	1.05367	0.885479	0.02343
O65660	AT4g39730/T19P19_120 OS=Arabidopsis thaliana GN=At4g39730 PE=1 SV=1 - [O65660_ARATH]	111.41	30.39	2	4	5	17	181	20.1	5.19	0.963	1.063	1.06	1.1	0.982	0.953	1.01167	1.02867	0.983474	0.775329
Q93Y35	26S proteasome non-ATPase regulatory subunit 6 homolog OS=Arabidopsis thaliana GN=RPN7 PE=1 SV=1 - [PSMD6_ARATH]	111.32	27.91	1	9	9	16	387	44.3	5.99	1.047	1.128	0.984	0.944	0.929	0.99	0.954333	1.053	0.906299	0.0961698
P23686	S-adenosylmethionine synthase 1 OS=Arabidopsis thaliana GN=SAM1 PE=1 SV=2 - [METK1_ARATH]	111.27	20.36	6	3	7	10	393	43.1	5.82	1.057	1.065	0.987	1.002	1.022	0.963	0.995667	1.03633	0.960759	0.249759
Q9LQQ4	Histone H2B.1 OS=Arabidopsis thaliana GN=At1g07790 PE=1 SV=3 - [H2B1_ARATH]	110.95	43.24	2	1	7	28	148	16.4	10.05	0.971	0.995	1.002	1.117	1.019	0.978	1.038	0.989333	1.04919	0.313934
Q9LZT0	Histone H2B.7 OS=Arabidopsis thaliana GN=At3g46030 PE=1 SV=3 - [H2B7_ARATH]	110.95	58.62	3	4	10	34	145	15.9	10.02	0.928	1.063	0.993	1.006	1.167	0.853	1.00867	0.994667	1.01408	0.894038
Q9FLX7	Probable NADH dehydrogenase [ubiquinone] 1 alpha subcomplex subunit 5, mitochondrial OS=Arabidopsis thaliana GN=At5g52840 PE=1 SV=1 - [NDUA5_ARATH]	110.42	30.18	1	5	5	11	169	19.2	4.77	1.053	1.038	1.006	0.95	1.023	0.942	0.971667	1.03233	0.941233	0.106833
Q9SS01	Benzoate--CoA ligase, peroxisomal OS=Arabidopsis thaliana GN=AAE20 PE=1 SV=1 - [AAE20_ARATH]	110.39	24.66	7	14	14	18	580	64.9	7.64	1.1	1.202	1.113	0.862	0.825	0.799	0.828667	1.13833	0.727965	0.0011031
O80565	Outer envelope pore protein 37, chloroplastic OS=Arabidopsis thaliana GN=OEP37 PE=2 SV=2 - [OEP37_ARATH]	110.14	19.83	1	6	6	8	343	38.8	9.11	1.05	1.123	1.166	0.883	0.886	0.896	0.888333	1.113	0.798143	0.00274395
Q94CE5	Gamma-aminobutyrate transaminase POP2, mitochondrial OS=Arabidopsis thaliana GN=POP2 PE=1 SV=1 - [GATP_ARATH]	110.1	32.54	1	12	12	20	504	55.2	7.94	0.984	0.974	0.991	0.979	1.047	0.989	1.005	0.983	1.02238	0.369268
Q9M812	Protein CURVATURE THYLAKOID 1C, chloroplastic OS=Arabidopsis thaliana GN=CURT1C PE=1 SV=1 - [CUT1C_ARATH]	109.86	20.51	1	2	2	3	156	16.9	9.04	0.935	1.039	0.954	0.998	0.967	1.119	1.028	0.976	1.05328	0.408156
O80852	Glutathione S-transferase F9 OS=Arabidopsis thaliana GN=GSTF9 PE=1 SV=1 - [GSTF9_ARATH]	109.63	35.35	2	5	6	17	215	24.1	6.65	1.184	1.139	1.099	0.772	0.905	0.764	0.813667	1.14067	0.713326	0.00324328
Q8GXE5	Peptidase family M48 family protein OS=Arabidopsis thaliana GN=At5g51740 PE=2 SV=1 - [Q8GXE5_ARATH]	109.49	16.52	2	6	6	7	442	49.6	9.63	1.169	0.937	0.912	0.997	0.956	1.059	1.004	1.006	0.998012	0.982785
Q9LK23	Glucose-6-phosphate 1-dehydrogenase, cytoplasmic isoform 1 OS=Arabidopsis thaliana GN=ACG9 PE=2 SV=1 - [G6PD5_ARATH]	109.42	17.83	1	5	8	11	516	59.1	8.31	1.019	0.953	0.946	0.984	1.014	1.029	1.009	0.972667	1.03735	0.246
Q9ZV06	Probable acetyltransferase NATA1-like OS=Arabidopsis thaliana GN=At2g39020 PE=2 SV=1 - [NATAL_ARATH]	109.27	17.37	1	3	3	4	236	26.4	6.1	1.004	1.002	0.994	1.012	1.034	0.978	1.008	1	1.008	0.65453
Q9XFH9	Thioredoxin F2, chloroplastic OS=Arabidopsis thaliana GN=At5g16400 PE=2 SV=1 - [TRXF2_ARATH]	109.19	10.81	1	2	2	17	185	20	8.82	0.859	0.821	0.894	1.287	1.043	1.2	1.17667	0.858	1.37141	0.0128408
Q9SMW7	Basic transcription factor 3 OS=Arabidopsis thaliana GN=BTF3 PE=1 SV=1 - [BTF3_ARATH]	109.17	54.55	1	5	9	20	165	17.9	7.25	0.807	0.818	0.775	1.24	1.314	1.264	1.27267	0.8	1.59083	4.85269e-05
F4JTD3	40S ribosomal protein S10-1 OS=Arabidopsis thaliana GN=At4g25740 PE=4 SV=1 - [F4JTD3_ARATH]	108.99	48.32	2	3	7	23	149	16.4	9.48	0.912	1.004	0.932	1.085	0.971	0.994	1.01667	0.949333	1.07093	0.205878
Q9FJ95	Sorbitol dehydrogenase OS=Arabidopsis thaliana GN=SDH PE=1 SV=1 - [DHSO_ARATH]	108.76	40.11	1	12	12	16	364	39.2	5.97	1.029	1.025	1.1	0.931	0.891	0.925	0.915667	1.05133	0.870958	0.00771366
Q9LPD0	ATPase ASNA1 homolog OS=Arabidopsis thaliana GN=F22M8.4 PE=3 SV=1 - [Q9LPD0_ARATH]	108.73	28.12	5	7	7	8	345	38.7	4.81	1.035	1	1.014	0.95	0.882	1.005	0.945667	1.01633	0.930469	0.128748
Q39129	Thiosulfate sulfurtransferase 16, chloroplastic OS=Arabidopsis thaliana GN=STR16 PE=1 SV=2 - [STR16_ARATH]	108.72	66.67	2	5	5	8	120	12.7	7.03	0.658	0.647	0.641	1.44	1.567	1.278	1.42833	0.648667	2.20195	0.00074189
Q9S7B5	Threonine synthase 1, chloroplastic OS=Arabidopsis thaliana GN=TS1 PE=1 SV=1 - [THRC1_ARATH]	108.65	21.29	1	9	9	10	526	57.7	7.42	1.047	1.014	1.011	1.071	0.928	0.99	0.996333	1.024	0.972982	0.554796
O22822	UDP-glycosyltransferase 74F2 OS=Arabidopsis thaliana GN=UGT74F2 PE=1 SV=1 - [U74F2_ARATH]	108.43	18.04	5	6	6	16	449	50.7	5.35	0.827	0.936	0.921	1.107	1.176	1.118	1.13367	0.894667	1.26714	0.00404015
Q9LZ45	Histone H2B.9 OS=Arabidopsis thaliana GN=At5g02570 PE=1 SV=3 - [H2B9_ARATH]	108.31	48.48	3	2	7	25	132	14.5	10.07	1.017	0.904	0.833	1.016	1.135	1.175	1.10867	0.918	1.2077	0.0565812
Q8LPR9	Protein TIC110, chloroplastic OS=Arabidopsis thaliana GN=TIC110 PE=1 SV=1 - [TI110_ARATH]	108.16	9.45	1	6	6	8	1016	112.1	5.97	1.03	1.028	1.017	1.014	0.886	1.068	0.989333	1.025	0.965203	0.545871
F4JIM7	Ribophorin II (RPN2) family protein OS=Arabidopsis thaliana GN=HAP6 PE=4 SV=1 - [F4JIM7_ARATH]	108.15	22.27	2	13	14	23	678	73.2	7.09	0.991	0.991	0.983	1.044	1.005	1.011	1.02	0.988333	1.03204	0.0632482
Q9LYS0	Auxin reponsive-like protein OS=Arabidopsis thaliana GN=T22N19_10 PE=2 SV=1 - [Q9LYS0_ARATH]	107.95	18.18	4	3	9	14	594	66.9	5.41	0.925	0.962	0.922	1.083	1.064	1.169	1.10533	0.936333	1.18049	0.00827546
Q9ZVL6	UPF0603 protein At1g54780, chloroplastic OS=Arabidopsis thaliana GN=At1g54780 PE=1 SV=1 - [U603_ARATH]	107.89	18.95	1	5	5	8	285	31.1	8.84	1.134	1.141	1.059	0.81	0.817	0.78	0.802333	1.11133	0.721956	0.000415871
O23593	AT4g17520/dl4795w OS=Arabidopsis thaliana GN=dl4795w PE=1 SV=1 - [O23593_ARATH]	107.87	27.5	2	4	7	20	360	38.9	8.75	0.728	0.709	0.707	1.301	1.435	1.345	1.36033	0.714667	1.90345	8.61523e-05
Q681H8	Ferritin (Fragment) OS=Arabidopsis thaliana GN=At3g11050 PE=2 SV=1 - [Q681H8_ARATH]	107.85	50.7	5	11	11	29	215	24.5	5.36	1.052	1.051	1.04	0.973	0.9	0.979	0.950667	1.04767	0.907413	0.0194864
A8MS28	60S ribosomal protein L27-3 OS=Arabidopsis thaliana GN=At4g15000 PE=4 SV=1 - [A8MS28_ARATH]	107.38	35.88	3	3	5	17	131	15	10.15	0.972	0.997	1.106	0.993	0.994	1.018	1.00167	1.025	0.977236	0.60764
Q93VP3	Eukaryotic translation initiation factor 5A-2 OS=Arabidopsis thaliana GN=ELF5A-2 PE=1 SV=1 - [IF5A2_ARATH]	107.34	50.31	3	7	10	20	159	17.1	5.94	1.021	1.099	1.059	0.993	0.912	0.89	0.931667	1.05967	0.879207	0.0294233
Q9SID0	Probable fructokinase-1 OS=Arabidopsis thaliana GN=At2g31390 PE=2 SV=1 - [SCRK1_ARATH]	107.25	29.85	5	6	9	16	325	35.3	5.49	0.956	0.893	0.982	1.016	1.087	1.07	1.05767	0.943667	1.12081	0.0284994
P49077	Aspartate carbamoyltransferase, chloroplastic OS=Arabidopsis thaliana GN=PYRB PE=2 SV=2 - [PYRB_ARATH]	107.21	21.54	1	8	8	10	390	43.1	6.6	1.068	1.052	1.066	0.962	0.945	0.902	0.936333	1.062	0.88167	0.00247784
Q9FJY6	Aldose 1-epimerase family protein OS=Arabidopsis thaliana GN=At5g66530 PE=2 SV=1 - [Q9FJY6_ARATH]	107.12	24.43	2	6	6	10	307	33.7	5.96	1.025	0.991	1.07	0.961	0.96	0.979	0.966667	1.02867	0.939728	0.0590252
P49211	60S ribosomal protein L32-1 OS=Arabidopsis thaliana GN=RPL32A PE=2 SV=2 - [RL321_ARATH]	106.84	37.59	1	2	5	13	133	15.5	10.89	1.011	0.984	0.989	1.086	1.037	0.973	1.032	0.994667	1.03753	0.330709
Q9FHM7	Hypersensitive-induced response protein 4 OS=Arabidopsis thaliana GN=HIR4 PE=1 SV=1 - [HIR4_ARATH]	106.73	32.19	1	9	9	10	292	32.4	5.43	0.986	1.08	1.004	0.981	1.031	0.953	0.988333	1.02333	0.965798	0.394781
B7ZWR6	Outer envelope protein 61 OS=Arabidopsis thaliana GN=OEP61 PE=1 SV=1 - [OEP61_ARATH]	106.65	33.39	1	18	18	21	554	60.7	5.88	0.947	0.956	1.009	1.031	1.025	1.041	1.03233	0.970667	1.06353	0.0362457
Q9T0A0	Long chain acyl-CoA synthetase 4 OS=Arabidopsis thaliana GN=LACS4 PE=2 SV=1 - [LACS4_ARATH]	106.23	16.82	4	9	9	10	666	74.5	5.87	1.051	1.073	1.031	0.918	0.938	0.935	0.930333	1.05167	0.884628	0.000881122
O49299	Probable phosphoglucomutase, cytoplasmic 1 OS=Arabidopsis thaliana GN=At1g23190 PE=2 SV=2 - [PGMC1_ARATH]	105.92	39.79	2	9	18	31	583	63.1	6.3	1.006	1.028	1.031	1.015	0.974	0.966	0.985	1.02167	0.964111	0.09863
A8MQR6	Methylmalonate-semialdehyde dehydrogenase [acylating] OS=Arabidopsis thaliana GN=ALDH6B2 PE=3 SV=1 - [A8MQR6_ARATH]	105.8	19.28	3	10	11	16	498	53.4	6	1.066	1.088	1.138	0.916	0.931	0.912	0.919667	1.09733	0.838092	0.00129349
Q8LCL3	60S ribosomal protein L27-2 OS=Arabidopsis thaliana GN=RPL27B PE=2 SV=2 - [RL272_ARATH]	105.54	18.52	2	1	3	14	135	15.6	10.27	1.014	1.048	1.083	0.986	1.038	0.869	0.964333	1.04833	0.919873	0.193455
Q9SJL8	S-adenosylmethionine synthase 3 OS=Arabidopsis thaliana GN=METK3 PE=1 SV=1 - [METK3_ARATH]	105.49	28.21	3	5	9	15	390	42.5	6.18	1.035	1.147	1.012	0.916	0.917	0.89	0.907667	1.06467	0.852536	0.0211429
Q9FJF1	Putative GTP-binding protein ara-3 OS=Arabidopsis thaliana GN=At5g59840 PE=2 SV=1 - [Q9FJF1_ARATH]	105.22	37.5	9	1	7	16	216	23.8	8.22	0.816	1.009	1.209	0.792	0.859	1.349	1	1.01133	0.988794	0.959362
Q9FLP6	Small ubiquitin-related modifier 2 OS=Arabidopsis thaliana GN=SUMO2 PE=1 SV=1 - [SUMO2_ARATH]	105.18	33.98	2	1	4	6	103	11.6	5.55	0.917	1.039	0.972	1.1	1.102	0.953	1.05167	0.976	1.07753	0.280233
Q9ZUU4	RNA-binding protein CP29B, chloroplastic OS=Arabidopsis thaliana GN=CP29B PE=1 SV=1 - [CP29B_ARATH]	105.17	19.38	1	3	5	10	289	30.7	5.16	1.014	1.096	1.062	0.986	0.971	0.901	0.952667	1.05733	0.901009	0.0416293
Q8LEQ0	60S acidic ribosomal protein P1-3 OS=Arabidopsis thaliana GN=RPP1C PE=1 SV=2 - [RLA13_ARATH]	105.13	66.37	1	2	4	8	113	11.2	4.36	1.158	0.986	0.965	1.085	1.068	0.892	1.015	1.03633	0.979415	0.818064
Q8RWF0	26S proteasome non-ATPase regulatory subunit 13 homolog A OS=Arabidopsis thaliana GN=RPN9A PE=1 SV=1 - [PS13A_ARATH]	104.71	20.98	2	4	8	15	386	44.1	5.31	1.1	1.146	1.058	0.866	0.889	0.88	0.878333	1.10133	0.797518	0.0010572
Q8LCW6	Similar to late embryogenesis abundant proteins OS=Arabidopsis thaliana PE=2 SV=1 - [Q8LCW6_ARATH]	104.7	25	2	7	7	11	324	35.9	4.87	1.073	1.005	1.048	0.959	1.055	1.001	1.005	1.042	0.964491	0.339569
P28188	Ras-related protein RABD2a OS=Arabidopsis thaliana GN=RABD2A PE=1 SV=3 - [RAD2A_ARATH]	104.57	40.39	7	2	7	15	203	22.6	5.16	0.882	0.86	0.759	1.265	1.232	1.191	1.22933	0.833667	1.47461	0.000810156
Q9LTR2	Protein TRIGALACTOSYLDIACYLGLYCEROL 2, chloroplastic OS=Arabidopsis thaliana GN=TGD2 PE=1 SV=1 - [TGD2_ARATH]	104.56	12.86	1	3	3	6	381	41.6	8.69	1.068	0.998	0.936	0.997	0.898	1.065	0.986667	1.00067	0.986009	0.831572
Q9C713	Arginine--tRNA ligase, cytoplasmic OS=Arabidopsis thaliana GN=At1g66530 PE=1 SV=1 - [SYRC_ARATH]	104.53	12.03	1	1	6	10	590	66.4	6.35	1.131	1.077	1.053	0.855	1.076	0.804	0.911667	1.087	0.8387	0.11291
Q9SK66	NADH dehydrogenase [ubiquinone] 1 alpha subcomplex subunit 9, mitochondrial OS=Arabidopsis thaliana GN=At2g20360 PE=1 SV=2 - [NDUA9_ARATH]	104.45	22.64	1	7	7	19	402	43.9	9.23	0.97	0.97	0.973	1.031	1.078	1.02	1.043	0.971	1.07415	0.0155808
P83291	NADH-cytochrome b5 reductase-like protein OS=Arabidopsis thaliana GN=CBR2 PE=1 SV=2 - [NB5R2_ARATH]	104.31	41.16	1	12	12	27	328	36	8.69	0.755	0.767	0.756	1.28	1.363	1.259	1.30067	0.759333	1.71291	7.14348e-05
Q8L9C4	Very-long-chain 3-oxoacyl-CoA reductase 1 OS=Arabidopsis thaliana GN=KCR1 PE=1 SV=1 - [KCR1_ARATH]	104.03	39.94	1	11	11	31	318	35.7	9.47	0.993	1.185	1.036	0.907	0.946	0.882	0.911667	1.07133	0.850965	0.0591699
O04308	Probable mitochondrial-processing peptidase subunit alpha-2, chloroplastic/mitochondrial OS=Arabidopsis thaliana GN=MPPA2 PE=1 SV=1 - [MPPA2_ARATH]	103.99	14.83	2	1	7	12	499	54	6.48	1.165	0.975	1.15	0.744	1.07	0.867	0.893667	1.09667	0.814894	0.146656
Q9FMH8	Probable cysteine protease RD21B OS=Arabidopsis thaliana GN=RD21B PE=1 SV=1 - [RD21B_ARATH]	103.75	17.49	1	6	6	10	463	51.2	6.21	0.975	0.898	0.969	1.071	1.046	1.068	1.06167	0.947333	1.12069	0.0116421
Q8LCW9	60S acidic ribosomal protein P1-1 OS=Arabidopsis thaliana GN=RPP1A PE=2 SV=2 - [RLA11_ARATH]	103.75	66.07	2	2	4	12	112	11.2	4.36	1.028	0.969	0.992	0.889	1	1.034	0.974333	0.996333	0.977919	0.664268
Q8L790	Pectinesterase, putative OS=Arabidopsis thaliana GN=At1g76160 PE=2 SV=1 - [Q8L790_ARATH]	103.72	20.52	12	7	10	18	541	60	8.4	1.122	1.146	1.179	0.861	0.774	0.867	0.834	1.149	0.725849	0.000780127
Q66GR6	Single-stranded DNA-binding protein WHY3, chloroplastic OS=Arabidopsis thaliana GN=WHY3 PE=1 SV=1 - [WHY3_ARATH]	103.7	23.88	1	5	6	8	268	29.7	9.52	0.978	0.932	0.995	1.11	1.039	1.044	1.06433	0.968333	1.09914	0.0316541
Q9SEI4	26S protease regulatory subunit 6B homolog OS=Arabidopsis thaliana GN=RPT3 PE=1 SV=1 - [PRS6B_ARATH]	103.61	24.75	3	8	9	17	408	45.7	5.6	1.008	1.031	1.035	1.011	1.011	0.959	0.993667	1.02467	0.969746	0.182909
Q9SSR9	F6D8.11 protein OS=Arabidopsis thaliana GN=F6D8.11 PE=4 SV=1 - [Q9SSR9_ARATH]	103.57	23.5	2	3	3	9	234	25.1	6.6	0.955	0.855	0.94	1.179	1.023	1.081	1.09433	0.916667	1.19382	0.03224
O22860	60S ribosomal protein L38 OS=Arabidopsis thaliana GN=RPL38A PE=3 SV=1 - [RL38_ARATH]	103.2	53.62	1	5	5	19	69	8.1	9.94	1.055	0.967	1.03	0.971	0.958	0.896	0.941667	1.01733	0.925623	0.0962895
Q9FLF0	40S ribosomal protein S9-2 OS=Arabidopsis thaliana GN=RPS9C PE=1 SV=1 - [RS92_ARATH]	102.99	34.52	2	3	9	22	197	23.1	10.35	0.976	0.881	0.941	1.165	1.087	1.052	1.10133	0.932667	1.18084	0.0177664
P46283	Sedoheptulose-1,7-bisphosphatase, chloroplastic OS=Arabidopsis thaliana GN=At3g55800 PE=2 SV=1 - [S17P_ARATH]	102.88	22.14	1	7	7	10	393	42.4	6.57	1.079	1.102	1.087	0.936	0.936	0.9	0.924	1.08933	0.848225	0.00027534
Q9SS90	E3 ubiquitin-protein ligase RGLG1 OS=Arabidopsis thaliana GN=RGLG1 PE=1 SV=1 - [RGLG1_ARATH]	102.85	13.91	1	5	5	6	489	53.3	5.38	0.997	0.95	1.074	0.949	1.021	1.074	1.01467	1.007	1.00761	0.888154
P28186	Ras-related protein RABE1c OS=Arabidopsis thaliana GN=RABE1C PE=1 SV=1 - [RAE1C_ARATH]	102.84	37.5	8	1	7	16	216	23.8	7.83	1.167	1.183	1.127	0.822	0.762	0.879	0.821	1.159	0.708369	0.000852952
Q9LZJ5	ABC transporter C family member 14 OS=Arabidopsis thaliana GN=ABCC14 PE=1 SV=1 - [AB14C_ARATH]	102.72	9.55	7	12	13	18	1539	172	8.54	1.02	1.025	1.045	0.969	0.948	0.988	0.968333	1.03	0.940129	0.0112208
Q38942	Protein RAE1 OS=Arabidopsis thaliana GN=RAE1 PE=1 SV=2 - [RAE1_ARATH]	102.5	24.36	1	6	6	11	349	38.2	8.37	0.794	0.758	0.821	1.217	1.253	1.402	1.29067	0.791	1.63169	0.00110004
Q9LFN6	DEAD-box ATP-dependent RNA helicase 56 OS=Arabidopsis thaliana GN=RH56 PE=1 SV=2 - [RH56_ARATH]	102.44	38.64	6	16	16	26	427	48.3	5.64	0.974	0.981	0.999	0.982	1.001	1.001	0.994667	0.984667	1.01016	0.364143
Q9C7S3	Chloroplast inner membrane localized protein OS=Arabidopsis thaliana GN=F13A11.2 PE=2 SV=1 - [Q9C7S3_ARATH]	102.31	22.02	1	4	4	7	168	17.8	8.43	1.102	1.007	1.033	0.977	0.978	0.911	0.955333	1.04733	0.912158	0.0628606
Q9FFQ2	Alcohol dehydrogenase-like protein OS=Arabidopsis thaliana PE=4 SV=1 - [Q9FFQ2_ARATH]	102.24	16.45	4	5	5	6	383	40.9	7.09	1.076	1.057	1.059	0.912	0.918	0.962	0.930667	1.064	0.874687	0.00138802
Q94BR2	Aluminum induced protein with YGL and LRDR motifs OS=Arabidopsis thaliana GN=AILP1 PE=2 SV=1 - [Q94BR2_ARATH]	102.1	36.32	3	5	5	8	234	25	6.2	1.093	1.039	1.126	0.909	0.854	0.891	0.884667	1.086	0.81461	0.00259333
O24633	Proteasome subunit beta type-2-B OS=Arabidopsis thaliana GN=PBD2 PE=1 SV=1 - [PSB2B_ARATH]	102.09	35.68	2	3	7	16	199	22	6.68	0.972	1.045	1.024	1.001	1.089	1.01	1.03333	1.01367	1.0194	0.607991
Q2V3V9	Peroxisomal (S)-2-hydroxy-acid oxidase GLO1 OS=Arabidopsis thaliana GN=At3g14420 PE=4 SV=2 - [Q2V3V9_ARATH]	102	23.16	11	7	7	10	367	40.3	8.76	0.91	1.019	0.951	1.066	0.962	1.028	1.01867	0.96	1.06111	0.253025
Q9LZH9	60S ribosomal protein L7a-2 OS=Arabidopsis thaliana GN=RPL7AB PE=1 SV=1 - [RL7A2_ARATH]	101.91	46.09	9	3	15	34	256	29	10.15	1.039	1.012	1.065	0.971	0.948	0.992	0.970333	1.03867	0.934211	0.0263948
Q8L940	Pyridoxal 5'-phosphate synthase subunit PDX1.3 OS=Arabidopsis thaliana GN=PDX13 PE=1 SV=2 - [PDX13_ARATH]	101.74	26.21	3	3	7	12	309	33.2	6.11	1.054	0.958	0.995	1.067	0.972	0.919	0.986	1.00233	0.983705	0.767141
Q9M330	Probable proteasome inhibitor OS=Arabidopsis thaliana GN=At3g53970 PE=1 SV=1 - [PSMF1_ARATH]	101.66	24.5	2	5	5	9	302	32.1	5.12	1.073	1.061	1.089	0.891	0.927	0.941	0.919667	1.07433	0.856035	0.000801645
Q9LZQ4	Carbohydrate-binding-like fold-containing protein OS=Arabidopsis thaliana GN=T12C14_60 PE=4 SV=1 - [Q9LZQ4_ARATH]	101.29	7.17	3	6	6	7	1227	132.9	6.42	1.019	0.975	1.093	0.997	0.963	1.066	1.00867	1.029	0.98024	0.680439
F4J1V2	Chaperone protein dnaJ 3 OS=Arabidopsis thaliana GN=ATJ3 PE=4 SV=1 - [F4J1V2_ARATH]	101.19	25.36	4	8	8	13	343	37.7	8.18	0.985	1.052	1.006	1.044	1.074	0.948	1.022	1.01433	1.00756	0.866674
Q940G0	Transmembrane 9 superfamily member 1 OS=Arabidopsis thaliana GN=TMN1 PE=1 SV=1 - [TMN1_ARATH]	101.15	12.56	4	5	6	12	589	66.8	7.65	1.098	1.107	1.11	0.879	0.875	0.941	0.898333	1.105	0.812971	0.000674632
O80448	Pyridoxal 5'-phosphate synthase subunit PDX1.1 OS=Arabidopsis thaliana GN=PDX11 PE=1 SV=1 - [PDX11_ARATH]	101.08	22.98	3	2	6	11	309	32.8	6	0.979	0.963	0.975	1.088	1.031	1.049	1.056	0.972333	1.08605	0.00876246
P92974	Ubiquitin-activating enzyme E1 2 OS=Arabidopsis thaliana GN=UBA2 PE=1 SV=1 - [UBE12_ARATH]	100.86	11.98	2	5	10	18	1077	119.5	5.29	0.867	0.975	0.901	1.008	1.059	1.009	1.02533	0.914333	1.1214	0.0369777
Q8VYC5	Ketose-bisphosphate aldolase class-II family protein OS=Arabidopsis thaliana GN=At1g18270 PE=2 SV=1 - [Q8VYC5_ARATH]	100.69	12.75	5	12	12	14	1373	147	5.85	1.056	1.054	0.993	1.009	0.975	0.996	0.993333	1.03433	0.960361	0.14822
Q9C5C4	Acetylornithine deacetylase OS=Arabidopsis thaliana GN=At4g17830 PE=2 SV=1 - [ARGE_ARATH]	100.32	21.14	6	8	8	10	440	48.2	5.35	1.035	1.037	1.021	0.931	1.049	0.981	0.987	1.031	0.957323	0.271972
Q0PGJ6	Aldo-keto reductase family 4 member C9 OS=Arabidopsis thaliana GN=AKR4C9 PE=1 SV=1 - [AKRC9_ARATH]	100.28	32.7	1	6	9	15	315	35.1	8.12	0.994	0.82	0.886	1.144	1.203	1.191	1.17933	0.9	1.31037	0.00655847
F4JNE4	Pleckstrin homology (PH) domain-containing protein OS=Arabidopsis thaliana GN=At4g17140 PE=4 SV=1 - [F4JNE4_ARATH]	100.03	1.9	4	6	6	6	4216	470.7	6.16	0.9	0.977	0.968	1.109	0.993	0.997	1.033	0.948333	1.08928	0.133846
O48588	Molybdenum cofactor sulfurase family protein OS=Arabidopsis thaliana GN=T19K24.17 PE=2 SV=1 - [O48588_ARATH]	100.03	38.31	4	10	10	16	308	34.8	5.64	1.035	1.096	1.177	0.908	0.847	0.843	0.866	1.10267	0.785369	0.00686966
P34789	40S ribosomal protein S28-2 OS=Arabidopsis thaliana GN=RPS28C PE=3 SV=1 - [RS282_ARATH]	99.97	39.06	2	1	3	9	64	7.3	11.17	0.964	0.976	0.984	0.988	1.22	0.964	1.05733	0.974667	1.08482	0.369557
P49692	60S ribosomal protein L7a-1 OS=Arabidopsis thaliana GN=RPL7AA PE=1 SV=2 - [RL7A1_ARATH]	99.95	40.86	10	2	14	31	257	29.1	10.13	1.061	0.962	1.079	0.996	0.936	0.987	0.973	1.034	0.941006	0.210024
O80585	Methylenetetrahydrofolate reductase 2 OS=Arabidopsis thaliana GN=MTHFR2 PE=1 SV=2 - [MTHR2_ARATH]	99.87	12.79	1	4	6	6	594	66.8	5.5	1.03	0.924	0.972	0.961	0.861	1.162	0.994667	0.975333	1.01982	0.846547
P59169	Histone H3.3 OS=Arabidopsis thaliana GN=HTR4 PE=1 SV=2 - [H33_ARATH]	99.56	33.09	3	3	7	20	136	15.4	11.15	1.13	1.14	1.186	0.827	0.922	0.807	0.852	1.152	0.739583	0.00160339
Q9MA79	Fructose-1,6-bisphosphatase, cytosolic OS=Arabidopsis thaliana GN=At1g43670 PE=2 SV=1 - [F16P2_ARATH]	99.39	25.51	3	6	6	9	341	37.3	5.47	0.895	0.975	1.032	1.121	1.057	0.958	1.04533	0.967333	1.08063	0.275885
P49637	60S ribosomal protein L27a-3 OS=Arabidopsis thaliana GN=RPL27AC PE=2 SV=2 - [R27A3_ARATH]	99.22	45.89	2	7	7	20	146	16.4	10.59	0.974	0.944	1.041	1.052	1.066	0.918	1.012	0.986333	1.02602	0.666153
Q9LVJ1	Subtilisin-like protease SBT1.4 OS=Arabidopsis thaliana GN=SBT1.4 PE=2 SV=1 - [SBT14_ARATH]	99.12	14.93	2	8	8	12	777	81.8	6.77	0.926	1.022	0.926	1.031	1.027	1.038	1.032	0.958	1.07724	0.0828552
Q9LMB2	T29M8.1 protein OS=Arabidopsis thaliana GN=T29M8.1 PE=4 SV=1 - [Q9LMB2_ARATH]	99.11	30.55	5	6	6	10	311	34.3	8.69	0.964	0.897	0.944	1.016	1.058	1.06	1.04467	0.935	1.11729	0.0110177
Q94A52	DEAD-box ATP-dependent RNA helicase 2 OS=Arabidopsis thaliana GN=RH2 PE=2 SV=2 - [RH2_ARATH]	98.87	14.71	3	5	7	11	408	45.8	6.23	0.935	0.949	0.937	1.119	1.06	1.023	1.06733	0.940333	1.13506	0.0109178
F4I7I0	Alanine aminotransferase 1, mitochondrial OS=Arabidopsis thaliana GN=ALAAT1 PE=1 SV=1 - [ALAT1_ARATH]	98.81	23.02	5	12	13	17	543	59.8	6.43	0.998	1.035	1.019	1.01	1.058	0.971	1.013	1.01733	0.99574	0.881768
P20431	ATPase 3, plasma membrane-type OS=Arabidopsis thaliana GN=AHA3 PE=1 SV=2 - [PMA3_ARATH]	98.55	10.75	6	1	9	12	949	104.4	7.18	1.102	0.985	1.018	0.978	1.04	0.91	0.976	1.035	0.942995	0.313434
F4I1G1	Uncharacterized protein OS=Arabidopsis thaliana GN=At1g29350 PE=4 SV=1 - [F4I1G1_ARATH]	98.32	11.67	5	7	7	8	831	90.8	5.85	0.818	0.797	0.856	1.239	1.324	1.158	1.24033	0.823667	1.50587	0.00121661
F4IL65	Prefoldin 1 OS=Arabidopsis thaliana GN=PFD1 PE=4 SV=1 - [F4IL65_ARATH]	98.16	34.65	4	3	3	4	127	14.5	4.93	0.959	0.937	0.855	1.045	1.245	1.03	1.10667	0.917	1.20683	0.067516
C0Z311	AT4G02580 protein OS=Arabidopsis thaliana GN=At4g02580 PE=2 SV=1 - [C0Z311_ARATH]	98.14	32.52	2	5	5	11	163	18	7.21	1.029	0.996	0.993	1.002	0.996	1.028	1.00867	1.006	1.00265	0.86881
P26569	Histone H1.2 OS=Arabidopsis thaliana GN=At2g30620 PE=1 SV=1 - [H12_ARATH]	97.56	21.61	3	6	7	11	273	28.5	10.83	1.077	1.073	1.183	0.857	0.883	0.896	0.878667	1.111	0.790879	0.00355334
Q9C944	Probable histone H2A variant 3 OS=Arabidopsis thaliana GN=At1g52740 PE=1 SV=1 - [H2AV3_ARATH]	97.51	34.33	8	4	5	11	134	14.3	10.29	1.063	1.102	1.135	0.89	0.91	0.923	0.907667	1.1	0.825152	0.00110259
Q94K48	E-Z type HEAT repeat-containing protein OS=Arabidopsis thaliana GN=At3g62530 PE=2 SV=1 - [Q94K48_ARATH]	97.42	51.58	3	9	9	14	221	24.5	6.57	1.006	0.989	1.01	1.04	1.05	0.969	1.01967	1.00167	1.01797	0.531274
Q8VZU9	Derlin-1 OS=Arabidopsis thaliana GN=DER1 PE=2 SV=1 - [DERL1_ARATH]	97.39	9.77	1	1	1	1	266	29.2	9.95	0.908	0.801	1.01	1.209	0.96	1.24	1.13633	0.906333	1.25377	0.0984998
Q8LBF6	Putative uncharacterized protein OS=Arabidopsis thaliana PE=2 SV=1 - [Q8LBF6_ARATH]	96.89	25.58	4	3	3	4	129	15	9.11	0.88	0.952	0.97	1.138	1.089	1.072	1.09967	0.934	1.17737	0.00809808
Q43291	60S ribosomal protein L21-1 OS=Arabidopsis thaliana GN=RPL21A PE=2 SV=2 - [RL211_ARATH]	96.72	43.9	3	8	8	22	164	18.6	10.46	1.039	1.021	1.084	0.956	0.995	0.927	0.959333	1.048	0.915394	0.0310395
O64650	40S ribosomal protein S27-1 OS=Arabidopsis thaliana GN=RPS27A PE=3 SV=1 - [RS271_ARATH]	96.26	45.24	3	2	3	11	84	9.4	8.94	1.095	1.112	1.139	0.917	0.907	0.831	0.885	1.11533	0.793485	0.00155218
Q94C74	Serine hydroxymethyltransferase 2, mitochondrial OS=Arabidopsis thaliana GN=SHM2 PE=2 SV=2 - [GLYM2_ARATH]	96.14	23.02	1	9	12	18	517	57.3	8.75	1.094	1.076	1.05	0.945	0.903	0.936	0.928	1.07333	0.864596	0.00129417
Q944X6	2-oxoglutarate-dependent dioxygenase OS=Arabidopsis thaliana GN=AOP3 PE=2 SV=1 - [Q944X6_ARATH]	96.03	27.07	5	1	8	15	410	44.9	5.38	0.978	0.972	1.068	0.994	1.091	0.959	1.01467	1.006	1.00861	0.871385
Q9LV11	ATPase 11, plasma membrane-type OS=Arabidopsis thaliana GN=AHA11 PE=1 SV=1 - [PMA11_ARATH]	95.95	17.78	4	1	14	16	956	105.1	6.6	NA	NA	NA	NA	NA	NA	NA	NA	NA	NA
Q9LSQ5	NAD(P)H dehydrogenase (quinone) FQR1 OS=Arabidopsis thaliana GN=FQR1 PE=1 SV=1 - [FQR1_ARATH]	95.93	37.75	3	5	5	8	204	21.8	6.38	1.133	1.111	0.989	0.962	0.978	0.89	0.943333	1.07767	0.875348	0.0621666
Q9SKZ3	40S ribosomal protein S12-2 OS=Arabidopsis thaliana GN=RPS12C PE=1 SV=1 - [RS122_ARATH]	95.78	40.28	1	3	5	13	144	15.3	5.9	1.226	1.069	1.137	0.811	0.776	0.842	0.809667	1.144	0.707751	0.00246667
O48661	Spermidine synthase 2 OS=Arabidopsis thaliana GN=SPDSYN2 PE=1 SV=2 - [SPD2_ARATH]	95.7	30.59	1	4	7	10	340	37.1	4.84	0.948	0.93	0.993	1.002	1.005	1.132	1.04633	0.957	1.09335	0.128674
Q8LAN3	Probable prolyl 4-hydroxylase 4 OS=Arabidopsis thaliana GN=P4H4 PE=2 SV=1 - [P4H4_ARATH]	95.14	15.44	2	4	4	7	298	33	7.15	0.833	0.796	0.918	1.245	1.248	1.168	1.22033	0.849	1.43738	0.00113773
Q9C505	Eukaryotic translation initiation factor 5A-3 OS=Arabidopsis thaliana GN=ELF5A-3 PE=2 SV=1 - [IF5A3_ARATH]	94.95	48.1	2	4	7	20	158	17.2	5.94	1.118	1.162	1.095	0.839	0.848	0.875	0.854	1.125	0.759111	0.000269401
Q39251	Actin-depolymerizing factor 2 OS=Arabidopsis thaliana GN=ADF2 PE=1 SV=1 - [ADF2_ARATH]	94.8	45.26	7	2	5	11	137	15.7	5.43	0.917	1.04	1.018	1.044	1.027	0.972	1.01433	0.991667	1.02286	0.631051
Q67ZP4	Small nuclear ribonucleoprotein-associated protein OS=Arabidopsis thaliana GN=At5g44500 PE=2 SV=1 - [Q67ZP4_ARATH]	94.46	16.54	5	5	5	10	254	27	10.71	0.99	1.07	0.988	1.041	1.082	0.984	1.03567	1.016	1.01936	0.642249
Q39239	Thioredoxin H4 OS=Arabidopsis thaliana GN=TRX4 PE=3 SV=2 - [TRXH4_ARATH]	94.42	45.38	1	4	4	7	119	13.1	5.5	0.874	1.02	0.958	1.022	1.106	0.975	1.03433	0.950667	1.08801	0.216571
Q9M9S3	Single-stranded DNA-binding protein WHY1, chloroplastic OS=Arabidopsis thaliana GN=WHY1 PE=1 SV=1 - [WHY1_ARATH]	94.28	24.33	1	4	5	7	263	29	9.38	1.086	1.023	0.857	1.004	1.019	1.012	1.01167	0.988667	1.02326	0.753702
Q94KD7	AT4g20860/T13K14_20 OS=Arabidopsis thaliana PE=2 SV=1 - [Q94KD7_ARATH]	94.2	18.68	5	8	9	17	530	60.4	9.04	1.017	1.037	0.98	0.961	1.027	0.967	0.985	1.01133	0.973962	0.382794
B9DH50	AT5G52650 protein OS=Arabidopsis thaliana GN=At5g52650 PE=2 SV=1 - [B9DH50_ARATH]	93.92	35.75	4	3	7	26	179	19.5	9.51	1.057	0.991	1.081	0.976	1.025	0.928	0.976333	1.043	0.936082	0.161173
O22126	Fasciclin-like arabinogalactan protein 8 OS=Arabidopsis thaliana GN=FLA8 PE=1 SV=1 - [FLA8_ARATH]	93.9	13.33	3	4	4	8	420	43	5.68	0.857	0.835	0.939	1.206	1.172	1.11	1.16267	0.877	1.32573	0.00251154
O23515	60S ribosomal protein L15-1 OS=Arabidopsis thaliana GN=RPL15A PE=2 SV=1 - [RL151_ARATH]	93.77	44.61	2	10	10	27	204	24.2	11.44	1.034	1.032	1.093	0.928	0.934	0.959	0.940333	1.053	0.893004	0.00704396
Q9FWQ7	F17F16.6 protein OS=Arabidopsis thaliana GN=F17F16.6 PE=4 SV=1 - [Q9FWQ7_ARATH]	93.56	39.11	3	6	6	12	202	21.7	5.15	0.865	0.774	0.833	1.212	1.258	1.255	1.24167	0.824	1.50688	0.00016502
Q94A40	Coatomer subunit alpha-1 OS=Arabidopsis thaliana GN=At1g62020 PE=2 SV=2 - [COPA1_ARATH]	93.48	23.36	2	7	24	28	1216	136.5	6.98	0.926	0.913	0.987	1.168	1.022	1.02	1.07	0.942	1.13588	0.0769826
Q84K90	Putative uncharacterized protein At4g26410 OS=Arabidopsis thaliana GN=At4g26410 PE=2 SV=1 - [Q84K90_ARATH]	93.28	4.18	2	1	1	1	263	29.2	7.14	1.166	1.115	1.051	0.857	0.809	0.969	0.878333	1.11067	0.790816	0.015973
Q9SH90	Putative uncharacterized protein At2g37970 OS=Arabidopsis thaliana GN=T8P21.12 PE=2 SV=1 - [Q9SH90_ARATH]	93.28	63.26	2	12	12	27	215	23.7	8.13	0.884	0.869	0.884	1.14	1.227	1.092	1.153	0.879	1.31172	0.00233851
Q42523	Methylcrotonoyl-CoA carboxylase subunit alpha, mitochondrial OS=Arabidopsis thaliana GN=MCCA PE=1 SV=2 - [MCCA_ARATH]	93.11	7.77	1	5	5	5	734	80.4	6.9	0.982	1.065	1.024	0.997	0.923	0.956	0.958667	1.02367	0.936503	0.113092
Q42605	Bifunctional UDP-glucose 4-epimerase and UDP-xylose 4-epimerase 1 OS=Arabidopsis thaliana GN=UGE1 PE=1 SV=2 - [UGE1_ARATH]	93.09	26.21	2	4	7	10	351	39.1	6.57	0.881	0.864	0.883	1.096	1.131	1.261	1.16267	0.876	1.32725	0.00477101
Q96266	Glutathione S-transferase F8, chloroplastic OS=Arabidopsis thaliana GN=GSTF8 PE=1 SV=3 - [GSTF8_ARATH]	92.95	40.68	3	7	8	14	263	29.2	8.5	1.088	1.118	1.15	0.851	0.915	0.841	0.869	1.11867	0.776818	0.00103904
Q9SU58	ATPase 4, plasma membrane-type OS=Arabidopsis thaliana GN=AHA4 PE=2 SV=2 - [PMA4_ARATH]	92.76	17.19	4	1	13	15	960	105.7	6.52	0.89	0.833	0.904	1.259	1.131	1.145	1.17833	0.875667	1.34564	0.0027586
Q9SA57	Late embryogenesis abundant protein 3 OS=Arabidopsis thaliana GN=At1g03120 PE=3 SV=1 - [LEA3_ARATH]	92.67	23.08	1	3	3	6	182	18.9	4.75	0.964	0.865	0.972	1.063	0.938	1.137	1.046	0.933667	1.12031	0.171412
Q9SPE6	Alpha-soluble NSF attachment protein 2 OS=Arabidopsis thaliana GN=ASNAP2 PE=1 SV=1 - [SNAA2_ARATH]	92.53	30.45	3	8	8	14	289	32.7	5.33	0.998	1.01	0.978	0.989	1.013	0.977	0.993	0.995333	0.997656	0.876682
Q9XI36	Methyl-CpG-binding domain-containing protein 10 OS=Arabidopsis thaliana GN=MBD10 PE=1 SV=1 - [MBD10_ARATH]	92.31	33.85	2	9	11	19	384	42.3	4.67	1.021	0.875	0.979	0.982	1.022	1.015	1.00633	0.958333	1.05009	0.347302
Q29Q34	Alcohol dehydrogenase-like protein OS=Arabidopsis thaliana GN=At5g19440 PE=2 SV=1 - [Q29Q34_ARATH]	92.25	22.09	2	7	7	13	326	35.6	7.12	0.966	1.058	1.02	0.965	1.007	0.976	0.982667	1.01467	0.968463	0.339115
Q9FIK0	ATP-dependent 6-phosphofructokinase 2 OS=Arabidopsis thaliana GN=PFK2 PE=1 SV=1 - [PFKA2_ARATH]	92.13	23.2	1	10	10	14	444	49.2	7.12	0.99	1.066	0.999	1.006	1.04	1.01	1.01867	1.01833	1.00033	0.990482
Q9ZRE2	Ras-related protein RABD1 OS=Arabidopsis thaliana GN=RABD1 PE=1 SV=1 - [RABD1_ARATH]	92.11	47.32	2	6	8	14	205	22.7	5.27	1.019	1.09	0.965	0.915	0.937	1.045	0.965667	1.02467	0.94242	0.33654
Q8W585	ATP-dependent zinc metalloprotease FTSH 8, chloroplastic OS=Arabidopsis thaliana GN=FTSH8 PE=1 SV=1 - [FTSH8_ARATH]	92.01	21.46	7	12	12	15	685	73.2	5.95	1.097	1.088	1.125	0.874	0.837	0.901	0.870667	1.10333	0.789124	0.000424114
Q9SIP1	Stress-response A/B barrel domain-containing protein UP3 OS=Arabidopsis thaliana GN=UP3 PE=2 SV=1 - [UP3_ARATH]	91.7	38.4	1	8	8	14	263	28.8	6.96	1.112	1.089	1.089	0.922	0.912	0.918	0.917333	1.09667	0.836474	2.58527e-05
Q9SZ55	Putative uncharacterized protein AT4g31880 OS=Arabidopsis thaliana GN=At4g31880 PE=4 SV=1 - [Q9SZ55_ARATH]	91.52	5.75	4	4	4	5	852	91.9	5.41	1.038	1.071	1.064	0.992	0.987	0.857	0.945333	1.05767	0.893791	0.0682931
Q9S726	Probable ribose-5-phosphate isomerase 3, chloroplastic OS=Arabidopsis thaliana GN=RPI3 PE=1 SV=1 - [RPI3_ARATH]	91.14	30.43	1	7	7	9	276	29.3	6.02	1.086	1.133	1.123	0.842	0.906	0.899	0.882333	1.114	0.792041	0.000731356
Q38814	Thiamine thiazole synthase, chloroplastic OS=Arabidopsis thaliana GN=THI1 PE=1 SV=1 - [THI4_ARATH]	90.91	22.92	2	6	6	7	349	36.6	6.23	1.095	1.076	1.121	0.801	0.901	0.91	0.870667	1.09733	0.793439	0.00370018
Q9SJ44	Ubiquitin-conjugating enzyme E2 variant 1C OS=Arabidopsis thaliana GN=UEV1C PE=1 SV=1 - [UEV1C_ARATH]	90.89	53.1	5	3	6	9	145	16.5	7.03	0.863	0.822	0.959	1.137	1.198	1.311	1.21533	0.881333	1.37897	0.00685939
F4K020	Glucan endo-1,3-beta-glucosidase 10 OS=Arabidopsis thaliana GN=BG_PPAP PE=3 SV=1 - [F4K020_ARATH]	90.86	14.18	2	4	4	6	423	45	6.52	0.927	0.992	1.028	1.127	0.978	0.958	1.021	0.982333	1.03936	0.560334
O23443	Fumarylacetoacetate hydrolase-like protein OS=Arabidopsis thaliana GN=dl4011w PE=4 SV=2 - [O23443_ARATH]	90.71	29.28	4	6	6	11	222	24.1	7.49	1.028	1.08	1.065	0.931	0.924	0.909	0.921333	1.05767	0.8711	0.00124244
Q9FFN4	Beta-galactosidase 6 OS=Arabidopsis thaliana GN=BGAL6 PE=2 SV=1 - [BGAL6_ARATH]	90.62	33.57	6	18	20	33	718	79.7	8.84	1.036	1.049	1.03	0.97	1.015	0.916	0.967	1.03833	0.9313	0.0707438
Q8H1H8	At1g15130/F9L1_7 OS=Arabidopsis thaliana GN=At1g15130 PE=2 SV=1 - [Q8H1H8_ARATH]	90.31	12.29	1	1	8	9	846	95.2	6.32	0.82	0.957	1.091	1.182	0.951	1.114	1.08233	0.956	1.13215	0.291301
O80944	Aldo-keto reductase family 4 member C8 OS=Arabidopsis thaliana GN=AKR4C8 PE=1 SV=2 - [AKRC8_ARATH]	90.14	28.3	1	6	9	17	311	34.7	6.99	1.049	1.058	1.07	0.964	0.939	0.932	0.945	1.059	0.892351	0.000573555
Q8HT11	Photosystem II CP43 reaction center protein (Fragment) OS=Arabidopsis thaliana GN=psbC PE=3 SV=1 - [Q8HT11_ARATH]	89.88	7.75	2	2	2	2	400	44	7.59	1.121	1.118	1.116	0.897	0.849	0.845	0.863667	1.11833	0.77228	0.000109625
Q8LEA5	2-cys peroxiredoxin-like protein OS=Arabidopsis thaliana PE=2 SV=1 - [Q8LEA5_ARATH]	89.69	36.16	2	2	8	15	271	29.5	6	1.359	0.923	0.958	0.827	0.782	0.795	0.801333	1.08	0.741975	0.118347
Q8GYA6	26S proteasome non-ATPase regulatory subunit 13 homolog B OS=Arabidopsis thaliana GN=RPN9B PE=1 SV=1 - [PS13B_ARATH]	89.6	15.28	1	2	6	13	386	44	5.24	1.021	1.11	1.017	0.921	1.054	0.896	0.957	1.04933	0.912008	0.184615
Q9ZQ26	AT2G24420 protein OS=Arabidopsis thaliana GN=At2g24420 PE=2 SV=2 - [Q9ZQ26_ARATH]	89.59	25	3	10	12	21	440	50.3	9.33	1.027	1.063	1.05	0.939	0.973	0.979	0.963667	1.04667	0.920701	0.00703087
Q9M069	Glucan endo-1,3-beta-glucosidase 7 OS=Arabidopsis thaliana GN=At4g34480 PE=1 SV=2 - [E137_ARATH]	89.2	15.28	3	7	7	14	504	53.1	6.44	0.952	0.952	0.942	1.054	1.089	1.09	1.07767	0.948667	1.13598	0.000466832
Q9FNK4	Ornithine aminotransferase, mitochondrial OS=Arabidopsis thaliana GN=DELTA-OAT PE=1 SV=1 - [OAT_ARATH]	89.13	8.42	1	3	3	4	475	52.1	7.44	1.052	0.873	0.857	1.072	0.911	1.242	1.075	0.927333	1.15924	0.26558
Q8H124	Uncharacterized protein At2g34460, chloroplastic OS=Arabidopsis thaliana GN=At2g34460 PE=2 SV=1 - [Y2446_ARATH]	88.91	20.36	1	6	6	8	280	30.5	8.97	0.976	1.046	1.039	1.021	0.995	1.054	1.02333	1.02033	1.00294	0.919981
Q9LEV3	CBS domain-containing protein CBSX3, mitochondrial OS=Arabidopsis thaliana GN=CBSX3 PE=1 SV=1 - [CBSX3_ARATH]	88.86	41.26	1	7	7	16	206	22.7	9.01	1.062	1.02	1.12	0.883	0.959	0.867	0.903	1.06733	0.846034	0.0154656
P57720	Chorismate synthase, chloroplastic OS=Arabidopsis thaliana GN=EMB1144 PE=2 SV=2 - [AROC_ARATH]	88.68	21.33	3	8	8	10	436	47.3	8.12	0.944	0.973	1.012	0.98	1.083	0.998	1.02033	0.976333	1.04507	0.304359
Q38936	Peptidyl-prolyl cis-trans isomerase FKBP15-2 OS=Arabidopsis thaliana GN=FKBP15-2 PE=2 SV=2 - [FK152_ARATH]	88.63	33.13	1	4	5	12	163	17.6	5.41	0.761	0.821	0.819	1.224	1.252	1.216	1.23067	0.800333	1.53769	4.40292e-05
F4JYQ5	Probable methylthioribulose-1-phosphate dehydratase OS=Arabidopsis thaliana GN=At5g53850 PE=1 SV=1 - [F4JYQ5_ARATH]	88.57	8.21	3	3	3	6	402	45	6.3	1.049	0.954	0.946	0.993	0.954	1.086	1.011	0.983	1.02848	0.613926
Q9LR90	T23E23.20 OS=Arabidopsis thaliana PE=4 SV=1 - [Q9LR90_ARATH]	88.19	25.14	3	3	3	3	183	19.8	5.71	0.917	0.84	0.784	1.056	1.137	1.325	1.17267	0.847	1.38449	0.0212164
Q9FT97	Alpha-galactosidase 1 OS=Arabidopsis thaliana GN=AGAL1 PE=2 SV=1 - [AGAL1_ARATH]	87.97	24.88	1	8	8	14	410	45.7	6.67	1.016	1.109	1.121	0.887	0.908	0.938	0.911	1.082	0.841959	0.00926284
Q38799	Pyruvate dehydrogenase E1 component subunit beta-1, mitochondrial OS=Arabidopsis thaliana GN=PDH2 PE=1 SV=2 - [ODPB1_ARATH]	87.83	25.62	2	7	7	13	363	39.2	5.83	1.004	0.937	0.998	1.057	1.058	0.993	1.036	0.979667	1.0575	0.136906
Q9FKV0	Berberine bridge enzyme-like protein OS=Arabidopsis thaliana GN=At5g44380 PE=2 SV=1 - [Q9FKV0_ARATH]	87.69	18.85	3	9	9	11	541	60.6	9.48	0.93	1.024	0.876	1.026	1.071	1.091	1.06267	0.943333	1.1265	0.0652305
Q9SVD7	Ubiquitin-conjugating enzyme E2 variant 1D OS=Arabidopsis thaliana GN=UEV1D PE=1 SV=1 - [UEV1D_ARATH]	87.68	52.74	6	4	7	10	146	16.5	6.68	0.896	0.855	0.975	1.174	1.036	1.189	1.133	0.908667	1.24688	0.0202416
Q56WH1	Tubulin alpha-3 chain OS=Arabidopsis thaliana GN=TUBA3 PE=1 SV=2 - [TBA3_ARATH]	87.67	8.22	5	3	3	4	450	49.6	5.1	1.239	1.057	1.168	0.802	0.807	0.855	0.821333	1.15467	0.711316	0.00389131
A0A097PL68	Nitrilase/cyanide hydratase and apolipoprotein N-acyltransferase family protein (Fragment) OS=Arabidopsis thaliana PE=2 SV=1 - [A0A097PL68_ARATH]	87.25	27.15	2	8	8	11	302	33	6.64	1.067	1.067	1.063	0.922	0.935	0.905	0.920667	1.06567	0.863935	7.89958e-05
P24704	Superoxide dismutase [Cu-Zn] 1 OS=Arabidopsis thaliana GN=CSD1 PE=1 SV=2 - [SODC1_ARATH]	87.23	25	1	2	3	8	152	15.1	5.6	0.965	0.881	0.944	1.018	0.929	1.074	1.007	0.93	1.0828	0.19253
Q9SZ30	Imidazole glycerol phosphate synthase hisHF, chloroplastic OS=Arabidopsis thaliana GN=HISN4 PE=2 SV=1 - [HIS4_ARATH]	86.86	18.41	2	8	8	14	592	64.2	6.76	1.042	0.949	1.051	0.95	0.983	0.937	0.956667	1.014	0.943458	0.180262
A8MQ78	Protein always early 4 OS=Arabidopsis thaliana GN=ALY4 PE=1 SV=1 - [A8MQ78_ARATH]	86.71	16.07	3	4	4	5	280	29.7	11.5	0.89	0.914	0.918	1.137	1.146	1.127	1.13667	0.907333	1.25276	2.42992e-05
Q9CAB8	Probable peroxygenase 5 OS=Arabidopsis thaliana GN=PXG5 PE=2 SV=1 - [PXG5_ARATH]	86.7	52.6	1	7	10	18	192	21.5	8.92	0.97	1.014	0.969	1.035	1.114	0.941	1.03	0.984333	1.04639	0.430704
Q9SG80	Alpha-L-arabinofuranosidase 1 OS=Arabidopsis thaliana GN=ASD1 PE=1 SV=1 - [ASD1_ARATH]	86.52	22.86	2	11	12	15	678	75	5.77	1.015	1.09	0.961	0.936	1.005	1.014	0.985	1.022	0.963796	0.455169
Q8GW48	At4g15810 OS=Arabidopsis thaliana GN=HSBP PE=2 SV=1 - [Q8GW48_ARATH]	86.29	30.23	1	2	2	4	86	9.3	4.48	1.202	0.919	0.927	0.948	0.95	0.931	0.943	1.016	0.92815	0.477356
Q8GXS3	Pre-mRNA cleavage factor Im 25 kDa subunit 2 OS=Arabidopsis thaliana GN=CFIS2 PE=1 SV=1 - [CFIS2_ARATH]	86.15	18	1	3	3	5	200	22.8	9.11	0.621	0.79	0.688	1.437	1.448	1.441	1.442	0.699667	2.06098	0.00011281
Q96254	Guanosine nucleotide diphosphate dissociation inhibitor 1 OS=Arabidopsis thaliana GN=GDI1 PE=1 SV=1 - [GDI1_ARATH]	86.02	43.6	2	11	17	29	445	49.8	5.74	1.055	1.06	1.022	0.926	1.002	0.959	0.962333	1.04567	0.920306	0.0291035
O81742	Beta-adaptin-like protein C OS=Arabidopsis thaliana GN=BETAC-AD PE=1 SV=2 - [APBLC_ARATH]	86.02	4.93	3	3	3	3	893	99	5.02	1.17	0.949	1.144	0.836	0.886	0.876	0.866	1.08767	0.7962	0.0360483
Q9LQ55	Dynamin-2B OS=Arabidopsis thaliana GN=DRP2B PE=1 SV=2 - [DRP2B_ARATH]	85.94	15.54	3	12	12	14	920	100.2	9.04	1.024	0.993	1.056	1.005	0.937	0.979	0.973667	1.02433	0.950537	0.132663
Q8HT12	Photosystem II D2 protein (Fragment) OS=Arabidopsis thaliana GN=psbD PE=3 SV=1 - [Q8HT12_ARATH]	85.76	13.88	2	3	3	8	317	35.2	5.91	1.133	0.998	1.022	0.93	0.918	1.01	0.952667	1.051	0.906438	0.124031
Q9CAR7	Hypersensitive-induced response protein 2 OS=Arabidopsis thaliana GN=HIR2 PE=1 SV=1 - [HIR2_ARATH]	85.65	16.78	1	3	4	7	286	31.4	5.43	0.987	0.986	1.102	1	1.207	0.876	1.02767	1.025	1.0026	0.980761
Q9LLC1	Biotin carboxyl carrier protein of acetyl-CoA carboxylase 2, chloroplastic OS=Arabidopsis thaliana GN=BCCP2 PE=2 SV=1 - [BCCP2_ARATH]	85.57	18.04	1	3	5	10	255	27.3	7.8	1.102	0.996	1.007	0.891	0.967	0.941	0.933	1.035	0.901449	0.0648933
Q9M337	40S ribosomal protein S21-1 OS=Arabidopsis thaliana GN=RPS21B PE=1 SV=1 - [RS211_ARATH]	85.52	18.29	1	1	1	4	82	9.1	8	0.97	0.896	1.145	0.965	0.857	1.21	1.01067	1.00367	1.00697	0.958974
Q9CAN8	Lysophospholipid acyltransferase 2 OS=Arabidopsis thaliana GN=LPLAT2 PE=1 SV=1 - [MBOA2_ARATH]	85.47	4.09	2	2	2	3	465	52.7	9.2	1.043	1.106	1.188	0.868	0.872	0.881	0.873667	1.11233	0.785436	0.00479716
Q9LQ31	Jacalin-related lectin 4 OS=Arabidopsis thaliana GN=JAL4 PE=2 SV=1 - [JAL4_ARATH]	85.44	4.83	1	3	3	4	745	81.8	6.65	1.036	1.103	1.053	0.928	0.922	0.896	0.915333	1.064	0.860276	0.00266487
Q8LPJ5	Isocitrate dehydrogenase [NADP], chloroplastic/mitochondrial OS=Arabidopsis thaliana GN=At5g14590 PE=2 SV=1 - [ICDHP_ARATH]	85.38	30.1	1	8	14	26	485	54.2	7.97	0.992	1.016	0.938	1.065	1.052	0.959	1.02533	0.982	1.04413	0.345669
Q94A94	Diaminopimelate decarboxylase 2, chloroplastic OS=Arabidopsis thaliana GN=LYSA2 PE=1 SV=1 - [DCDA2_ARATH]	85.33	16.36	1	3	7	9	489	54.1	6.67	1.053	1.148	0.982	0.961	0.957	0.794	0.904	1.061	0.852026	0.0981206
Q9C8G5	CSC1-like protein ERD4 OS=Arabidopsis thaliana GN=ERD4 PE=2 SV=1 - [CSCLD_ARATH]	85.32	13.26	1	9	9	12	724	81.9	9.23	1.068	1.115	1.075	0.931	0.945	0.86	0.912	1.086	0.839779	0.00445413
O80796	Membrane-associated protein VIPP1, chloroplastic OS=Arabidopsis thaliana GN=VIPP1 PE=1 SV=1 - [VIPP1_ARATH]	85.26	20.3	3	5	5	6	330	36.4	9.11	1.014	1.048	1.039	1.101	0.936	0.967	1.00133	1.03367	0.96872	0.565199
Q2HIK4	At1g29990 OS=Arabidopsis thaliana GN=PFD6 PE=2 SV=1 - [Q2HIK4_ARATH]	85.16	25.58	3	4	4	11	129	14.8	9.09	0.762	0.753	0.799	1.301	1.492	1.065	1.286	0.771333	1.66724	0.0143672
Q9LIB2	Alpha-glucan phosphorylase 1 OS=Arabidopsis thaliana GN=PHS1 PE=2 SV=1 - [PHS1_ARATH]	84.99	5.82	2	5	5	6	962	108.5	5.47	1.029	1.158	1.009	0.945	0.906	0.97	0.940333	1.06533	0.882666	0.0677259
O81852	Bifunctional aspartokinase/homoserine dehydrogenase 2, chloroplastic OS=Arabidopsis thaliana GN=AKHSDH2 PE=1 SV=1 - [AKH2_ARATH]	84.99	4.59	1	2	3	4	916	100.2	7.49	1.065	1.201	1.022	0.887	0.949	0.865	0.900333	1.096	0.821472	0.030291
Q42586	Uridine 5'-monophosphate synthase OS=Arabidopsis thaliana GN=PYRE-F PE=2 SV=2 - [UMPS_ARATH]	84.77	34.03	4	11	11	13	476	51.8	7.23	1.036	1.017	1.079	0.928	0.985	0.929	0.947333	1.044	0.907407	0.0212585
Q42564	L-ascorbate peroxidase 3, peroxisomal OS=Arabidopsis thaliana GN=APX3 PE=1 SV=1 - [APX3_ARATH]	84.68	25.09	6	7	7	8	287	31.6	6.95	0.963	0.961	0.969	1.016	1.047	1.147	1.07	0.964333	1.10957	0.0558995
Q9C8R4	Putative uncharacterized protein At1g30070 OS=Arabidopsis thaliana GN=T1P2.12 PE=1 SV=1 - [Q9C8R4_ARATH]	84.36	28.83	2	6	6	8	222	24.8	8.66	0.697	0.761	0.819	1.266	1.415	1.223	1.30133	0.759	1.71454	0.00134023
F4IH73	Uncharacterized protein OS=Arabidopsis thaliana GN=At2g45990 PE=1 SV=1 - [F4IH73_ARATH]	84.04	18.63	3	4	4	6	263	29.4	5.15	0.932	0.977	1.01	1.143	0.935	0.951	1.00967	0.973	1.03768	0.630673
F4I101	Alcohol dehydrogenase-like protein OS=Arabidopsis thaliana GN=At1g09500 PE=4 SV=1 - [F4I101_ARATH]	84.04	33.33	5	8	8	12	291	32.2	5.25	1.076	1.102	1.059	0.974	0.973	0.894	0.947	1.079	0.877665	0.010784
Q9C5Z3	Eukaryotic translation initiation factor 3 subunit E OS=Arabidopsis thaliana GN=TIF3E1 PE=1 SV=1 - [EIF3E_ARATH]	83.95	17.46	1	6	6	8	441	51.7	5.86	1.008	1.066	1.013	0.993	0.991	0.996	0.993333	1.029	0.965339	0.127826
Q8VZ95	Vesicle-associated protein 1-1 OS=Arabidopsis thaliana GN=PVA11 PE=1 SV=1 - [VAP11_ARATH]	83.92	21.09	2	5	5	7	256	28.5	8.4	0.993	1.039	1.002	1.004	1.029	0.933	0.988667	1.01133	0.977587	0.518005
Q941E4	AT3g26770/MDJ14_21 OS=Arabidopsis thaliana PE=2 SV=1 - [Q941E4_ARATH]	83.88	17.32	4	5	5	6	306	31.8	7.88	1.026	1.151	1.04	0.896	0.944	0.999	0.946333	1.07233	0.882499	0.0635637
Q9SK50	Protein TIC 55, chloroplastic OS=Arabidopsis thaliana GN=TIC55 PE=1 SV=1 - [TIC55_ARATH]	83.86	23.75	1	10	10	13	539	60.6	8.69	1.007	1.035	1.059	0.97	0.974	0.978	0.974	1.03367	0.942277	0.0171776
Q8LAH5	Palmitoyl-protein thioesterase-like OS=Arabidopsis thaliana PE=2 SV=1 - [Q8LAH5_ARATH]	83.69	24.56	3	7	7	10	338	37.1	5.47	0.96	0.976	0.968	1.085	1.003	1.08	1.056	0.968	1.09091	0.030884
Q9ZW35	Proliferating cell nuclear antigen 2 OS=Arabidopsis thaliana GN=PCNA2 PE=1 SV=1 - [PCNA2_ARATH]	83.5	29.92	1	1	7	9	264	29.2	4.72	1.046	0.961	1.166	0.851	1.03	0.954	0.945	1.05767	0.893476	0.226524
B3H4N7	60S acidic ribosomal protein P3-2 OS=Arabidopsis thaliana GN=At5g57290 PE=3 SV=1 - [B3H4N7_ARATH]	83.38	42.86	4	4	4	16	119	11.8	4.51	1.049	1.046	1.069	0.897	1.008	0.891	0.932	1.05467	0.883692	0.033917
Q8GWP4	At2g21530 OS=Arabidopsis thaliana GN=At2g21530 PE=1 SV=1 - [Q8GWP4_ARATH]	83.31	20.1	2	3	3	5	209	22.7	7.88	0.783	0.718	0.832	1.278	1.392	1.245	1.305	0.777667	1.6781	0.000681756
Q8L6Y1	Ubiquitin carboxyl-terminal hydrolase 14 OS=Arabidopsis thaliana GN=UBP14 PE=1 SV=1 - [UBP14_ARATH]	83.07	19.32	1	12	12	16	797	88.3	5.21	0.915	0.965	0.981	1.01	1.067	1.09	1.05567	0.953667	1.10696	0.0301848
B9DI38	AT1G05190 protein (Fragment) OS=Arabidopsis thaliana GN=At1g05190 PE=2 SV=1 - [B9DI38_ARATH]	83.02	16	2	3	3	4	200	22.2	9.8	0.908	0.963	1.044	1.067	1.036	1.035	1.046	0.971667	1.0765	0.143089
Q9LHT0	Tropinone reductase homolog At5g06060 OS=Arabidopsis thaliana GN=At5g06060 PE=2 SV=1 - [TRNHF_ARATH]	82.94	30.68	7	7	7	16	264	28.3	7.69	1.039	1.053	1.05	0.958	0.935	0.947	0.946667	1.04733	0.903883	0.000217234
F4K6W6	Translation initiation factor eIF-2 beta subunit OS=Arabidopsis thaliana GN=EIF2 BETA PE=1 SV=1 - [F4K6W6_ARATH]	82.74	28.46	2	6	6	7	267	30.5	7.2	1.004	0.993	1.03	1.056	1.036	1.03	1.04067	1.009	1.03138	0.0788099
O82660	Photosystem II stability/assembly factor HCF136, chloroplastic OS=Arabidopsis thaliana GN=HCF136 PE=1 SV=1 - [P2SAF_ARATH]	82.72	7.2	1	2	2	3	403	44.1	7.34	0.986	0.972	1.041	1.038	0.985	1.184	1.069	0.999667	1.06936	0.333671
F4HVV7	CCR4-NOT transcription complex subunit 1 domain protein OS=Arabidopsis thaliana GN=At1g02080 PE=4 SV=1 - [F4HVV7_ARATH]	82.61	1.94	3	3	3	4	2377	263.6	5.55	1.033	0.924	0.973	1.031	0.932	1.205	1.056	0.976667	1.08123	0.407455
O48529	Rhodanese-like domain-containing protein 9, chloroplastic OS=Arabidopsis thaliana GN=STR9 PE=2 SV=1 - [STR9_ARATH]	82.51	16.67	1	4	4	7	234	25.5	8.66	1.134	1.195	1.099	0.884	0.853	0.889	0.875333	1.14267	0.766044	0.000902144
O22581	Putative aldolase OS=Arabidopsis thaliana PE=2 SV=1 - [O22581_ARATH]	82.46	17.74	3	4	4	4	248	27	5.41	1.028	1.062	1.051	0.967	1.017	0.96	0.981333	1.047	0.937281	0.0330606
F4JFN3	Heat shock protein 90-6, mitochondrial OS=Arabidopsis thaliana GN=HSP90-6 PE=2 SV=1 - [HS906_ARATH]	82.44	17.77	1	8	11	17	799	90.5	5.39	0.966	0.992	0.954	0.956	1.026	1.063	1.015	0.970667	1.04567	0.254107
Q9SFT9	PPPDE putative thiol peptidase family protein OS=Arabidopsis thaliana GN=T1B9.26 PE=2 SV=1 - [Q9SFT9_ARATH]	82.3	10.19	1	2	2	4	265	28.8	5.82	0.889	0.761	0.83	1.209	1.286	1.143	1.21267	0.826667	1.46694	0.00223939
Q8L719	THO complex subunit 4B OS=Arabidopsis thaliana GN=ALY2 PE=1 SV=1 - [THO4B_ARATH]	82.28	28.42	1	7	8	11	292	30.8	9.98	0.927	0.913	0.929	1.077	1.142	1.099	1.106	0.923	1.19827	0.000752963
Q9FM19	Hypersensitive-induced response protein 1 OS=Arabidopsis thaliana GN=HIR1 PE=1 SV=1 - [HIR1_ARATH]	82.28	19.23	2	4	5	6	286	31.4	5.43	0.942	0.958	0.938	1.003	1.169	1.082	1.08467	0.946	1.14658	0.0454973
Q9LSP5	AT3g17020/K14A17_14 OS=Arabidopsis thaliana GN=At3g17020 PE=2 SV=1 - [Q9LSP5_ARATH]	82.09	40.49	1	5	5	13	163	17.8	6.92	0.981	1.11	0.948	0.939	0.958	0.979	0.958667	1.013	0.946364	0.34472
Q9ZW85	3-isopropylmalate dehydratase small subunit 3 OS=Arabidopsis thaliana GN=At2g43090 PE=1 SV=1 - [LEUD3_ARATH]	82.01	41.83	4	7	7	11	251	26.8	6.77	1.054	1.009	1.104	0.918	0.905	1.067	0.963333	1.05567	0.912536	0.191237
F4JK17	Cofactor-independent phosphoglycerate mutase OS=Arabidopsis thaliana GN=At4g09520 PE=4 SV=1 - [F4JK17_ARATH]	82	11.99	4	5	5	5	492	53.1	5.57	1.018	1.127	1.242	0.856	0.833	0.836	0.841667	1.129	0.745497	0.0115504
F4IIA5	20S proteasome subunit PAA2 OS=Arabidopsis thaliana GN=PAA2 PE=4 SV=1 - [F4IIA5_ARATH]	81.56	30.91	3	1	7	9	220	24.4	6.7	1.041	1.093	1.005	0.943	0.955	0.989	0.962333	1.04633	0.91972	0.0443643
Q94F09	Protein disulfide-isomerase 5-2 OS=Arabidopsis thaliana GN=PDIL5-2 PE=1 SV=1 - [PDI52_ARATH]	81.51	9.09	1	3	3	5	440	49.8	5.25	1.125	1.135	0.985	0.94	0.911	0.902	0.917667	1.08167	0.848382	0.0300478
Q9SJT7	V-type proton ATPase subunit a2 OS=Arabidopsis thaliana GN=VHA-a2 PE=1 SV=1 - [VHAA2_ARATH]	81.5	12.91	1	3	8	10	821	93	5.54	1.002	0.965	0.982	1.06	0.971	1.001	1.01067	0.983	1.02815	0.382781
O23193	CBS domain-containing protein CBSX1, chloroplastic OS=Arabidopsis thaliana GN=CBSX1 PE=1 SV=2 - [CBSX1_ARATH]	81.46	28.81	3	6	6	13	236	25.8	8.56	0.935	0.879	0.905	1.09	1.072	1.123	1.095	0.906333	1.20816	0.00101863
P68209	Succinyl-CoA ligase [ADP-forming] subunit alpha-1, mitochondrial OS=Arabidopsis thaliana GN=At5g08300 PE=1 SV=1 - [SUCA1_ARATH]	81.35	19.88	2	2	6	12	347	36.1	8.27	1.008	0.996	1.01	0.982	0.862	0.992	0.945333	1.00467	0.940942	0.230564
O48844	26S proteasome non-ATPase regulatory subunit 1 homolog A OS=Arabidopsis thaliana GN=RPN2A PE=1 SV=1 - [PSD1A_ARATH]	81.16	11.85	1	5	9	15	1004	108.9	5.39	0.947	1.022	0.941	1.059	1.087	0.998	1.048	0.97	1.08041	0.102739
Q56XI5	Cysteine proteinase RD21A OS=Arabidopsis thaliana GN=At1g47128 PE=2 SV=1 - [Q56XI5_ARATH]	81.14	12.47	6	5	5	7	433	47.8	5.1	0.934	0.965	0.948	1.043	1.137	1.042	1.074	0.949	1.13172	0.018833
Q93W30	Expressed protein OS=Arabidopsis thaliana GN=At2g35605 PE=2 SV=1 - [Q93W30_ARATH]	81.11	63.3	1	7	7	15	109	11.9	9.94	0.857	0.718	0.719	1.302	1.331	1.223	1.28533	0.764667	1.68091	0.000761505
F4IIQ3	Beta-galactosidase OS=Arabidopsis thaliana GN=BGAL8 PE=3 SV=1 - [F4IIQ3_ARATH]	80.98	13.95	4	7	9	15	846	92.5	7.85	0.924	0.896	0.877	1.108	1.056	1.096	1.08667	0.899	1.20875	0.000838786
Q9C5Y0	Phospholipase D delta OS=Arabidopsis thaliana GN=PLDDELTA PE=1 SV=2 - [PLDD1_ARATH]	80.72	17.51	2	12	12	17	868	98.9	7.17	1.023	0.974	0.956	1.072	1.04	1	1.03733	0.984333	1.05384	0.140471
Q9LXA8	Probable beta-D-xylosidase 6 OS=Arabidopsis thaliana GN=BXL6 PE=2 SV=1 - [BXL6_ARATH]	80.63	3.54	1	2	2	3	792	87.1	6.38	1.052	0.892	0.958	1.088	0.948	1.091	1.04233	0.967333	1.07753	0.320457
O04575	UPF0540 protein At1g62080 OS=Arabidopsis thaliana GN=At1g62080 PE=2 SV=1 - [U540C_ARATH]	80.6	26.67	1	2	2	2	150	15.1	10.7	0.902	0.853	0.805	1.202	1.211	1.188	1.20033	0.853333	1.40664	0.00027174
F4JLM5	Isoleucine--tRNA ligase, cytoplasmic OS=Arabidopsis thaliana GN=At4g10320 PE=2 SV=1 - [SYIC_ARATH]	80.55	18.49	3	18	18	20	1190	135.4	6.3	0.985	1.001	0.963	0.993	0.995	1.046	1.01133	0.983	1.02882	0.239967
O64866	Calcium-binding EF-hand-containing protein OS=Arabidopsis thaliana GN=At2g44310 PE=1 SV=1 - [O64866_ARATH]	80.48	37.32	1	5	5	8	142	15.8	4.51	1.031	1.074	1.041	0.985	1.03	0.89	0.968333	1.04867	0.923395	0.136887
Q84WT8	Cysteine proteinase inhibitor 4 OS=Arabidopsis thaliana GN=CYS4 PE=3 SV=2 - [CYT4_ARATH]	80.44	46.15	5	6	6	9	117	12.5	9.13	1.023	1.258	1.094	0.846	0.853	0.816	0.838333	1.125	0.745185	0.0152751
Q9SHH6	Glutathione S-transferase U24 OS=Arabidopsis thaliana GN=GSTU24 PE=2 SV=1 - [GSTUO_ARATH]	80.39	16.51	2	3	5	17	218	25.3	6.16	0.919	0.972	1.002	1.041	1.004	1.138	1.061	0.964333	1.10024	0.10748
Q9FN48	Calcium sensing receptor, chloroplastic OS=Arabidopsis thaliana GN=CAS PE=1 SV=1 - [CAS_ARATH]	80.36	25.06	1	7	7	9	387	41.3	9.39	1.079	1.075	0.981	0.965	0.936	0.994	0.965	1.045	0.923445	0.091221
F4J2B4	Proteasome component (PCI) domain protein OS=Arabidopsis thaliana GN=At3g02200 PE=1 SV=1 - [F4J2B4_ARATH]	80.34	34.34	3	9	9	12	364	41.1	5.07	0.911	1.03	0.958	0.939	1	0.878	0.939	0.966333	0.971714	0.609339
O49293	Peroxidase 13 OS=Arabidopsis thaliana GN=PER13 PE=3 SV=2 - [PER13_ARATH]	80.29	15.05	1	3	3	4	319	34.7	5.15	0.978	0.836	0.975	1.09	1.052	1.056	1.066	0.929667	1.14665	0.0478923
Q8LDK1	Prefoldin subunit 4 OS=Arabidopsis thaliana PE=2 SV=1 - [Q8LDK1_ARATH]	80.28	24.81	2	3	3	4	129	14.9	4.6	1.064	1.087	1.06	0.906	0.927	0.912	0.915	1.07033	0.854874	0.000120521
F4ILI2	Plant EC metallothionein-like protein, family 15 OS=Arabidopsis thaliana GN=At2g23240 PE=4 SV=1 - [F4ILI2_ARATH]	80.07	26.19	4	2	2	8	84	8.3	5.21	0.677	0.736	0.748	1.403	1.339	1.374	1.372	0.720333	1.90467	2.22881e-05
F4KFD7	26S proteasome regulatory particle non-ATPase subunit 5A OS=Arabidopsis thaliana GN=EMB2107 PE=4 SV=1 - [F4KFD7_ARATH]	80	24.43	9	10	10	13	442	50.8	7.66	1.005	0.987	1.001	0.945	0.992	0.975	0.970667	0.997667	0.972937	0.141828
Q945Q1	Cysteine proteinase inhibitor 1 OS=Arabidopsis thaliana GN=CYS1 PE=1 SV=2 - [CYT1_ARATH]	79.84	41.58	1	4	4	5	101	11.2	5.22	1.015	1.081	1.015	0.965	0.934	1.016	0.971667	1.037	0.936998	0.114665
B3H5Q0	Germin-like protein 2a OS=Arabidopsis thaliana GN=GER2 PE=3 SV=1 - [B3H5Q0_ARATH]	79.69	13	6	1	2	7	200	21.3	6.37	0.978	0.886	0.94	1.043	1.244	1.045	1.11067	0.934667	1.1883	0.070386
F4K8W6	Protein-L-isoaspartate O-methyltransferase OS=Arabidopsis thaliana GN=PIMT2 PE=3 SV=1 - [F4K8W6_ARATH]	79.64	20.47	8	4	4	8	215	23.1	6.89	0.835	0.752	0.897	1.203	1.236	1.153	1.19733	0.828	1.44605	0.00158879
O23714	Proteasome subunit beta type-2-A OS=Arabidopsis thaliana GN=PBD1 PE=1 SV=1 - [PSB2A_ARATH]	79.6	33.82	1	2	7	18	204	22.5	6.39	0.955	1.036	0.845	1.03	1.024	1.064	1.03933	0.945333	1.09944	0.17288
P54873	Hydroxymethylglutaryl-CoA synthase OS=Arabidopsis thaliana GN=HMGS PE=1 SV=2 - [HMCS_ARATH]	79.52	20.39	1	8	8	12	461	51.1	6.4	1.041	0.987	1.025	0.973	0.971	1.007	0.983667	1.01767	0.96659	0.161433
B3H4K4	RNA recognition motif-containing protein OS=Arabidopsis thaliana GN=At5g59950 PE=1 SV=1 - [B3H4K4_ARATH]	79.52	27.96	5	5	6	7	211	23.6	10.45	0.97	0.937	0.929	1.03	1.167	1.073	1.09	0.945333	1.15303	0.0268853
Q9FY49	Leukotriene A-4 hydrolase homolog OS=Arabidopsis thaliana GN=LKHA4 PE=2 SV=1 - [LKHA4_ARATH]	79.27	16.23	1	9	9	13	616	69.2	5.24	1.044	1.173	1.04	0.929	0.872	0.872	0.891	1.08567	0.820694	0.0150167
Q93Y40	Oxysterol-binding protein-related protein 3C OS=Arabidopsis thaliana GN=ORP3C PE=2 SV=1 - [ORP3C_ARATH]	79.24	13.35	2	4	5	7	457	51.9	5.3	1.005	1.017	1.024	1.001	0.975	0.981	0.985667	1.01533	0.970781	0.0368001
Q9FMR9	RuvB-like protein 1 OS=Arabidopsis thaliana GN=RIN1 PE=1 SV=1 - [RIN1_ARATH]	79	7.86	1	3	3	3	458	50.3	5.92	1.041	1.022	1.037	0.91	1.005	0.993	0.969333	1.03333	0.938065	0.103224
Q8LE52	Glutathione S-transferase DHAR3, chloroplastic OS=Arabidopsis thaliana GN=DHAR3 PE=1 SV=1 - [DHAR3_ARATH]	78.86	41.09	3	11	11	22	258	28.5	7.74	0.844	0.805	0.88	1.156	1.346	1.165	1.22233	0.843	1.44998	0.00443526
O22683	Cyanate hydratase OS=Arabidopsis thaliana GN=CYN PE=2 SV=1 - [CYNS_ARATH]	78.72	44.64	2	6	6	10	168	18.6	5.63	1.092	1.078	1.126	0.905	0.904	0.953	0.920667	1.09867	0.837985	0.00117286
Q56WF8	Serine carboxypeptidase-like 48 OS=Arabidopsis thaliana GN=SCPL48 PE=2 SV=2 - [SCP48_ARATH]	78.58	10.59	1	3	3	3	510	56.9	5.5	0.881	0.928	0.837	1.14	1.181	1.166	1.16233	0.882	1.31784	0.000630148
Q42599	NADH dehydrogenase [ubiquinone] iron-sulfur protein 8-A, mitochondrial OS=Arabidopsis thaliana GN=At1g79010 PE=2 SV=1 - [NDS8A_ARATH]	78.55	13.96	1	1	3	4	222	25.5	5.41	1.06	0.914	0.895	1.154	0.963	1.088	1.06833	0.956333	1.11711	0.217069
P56799	30S ribosomal protein S4, chloroplastic OS=Arabidopsis thaliana GN=rps4 PE=3 SV=1 - [RR4_ARATH]	78.45	11.94	1	2	2	4	201	23.2	10.33	1.034	0.949	0.916	1.046	1.088	1.038	1.05733	0.966333	1.09417	0.0769278
Q8H0V3	Lactoylglutathione lyase OS=Arabidopsis thaliana GN=At1g08110 PE=2 SV=1 - [LGUL_ARATH]	78.43	70.27	2	9	9	16	185	20.8	5.29	1.037	1.051	1.121	0.895	0.932	0.92	0.915667	1.06967	0.85603	0.00544993
Q9XI93	At1g13930/F16A14.27 OS=Arabidopsis thaliana GN=F7A19.2 PE=1 SV=1 - [Q9XI93_ARATH]	78.39	42.58	2	6	6	13	155	16.2	4.92	0.773	0.78	0.736	1.215	1.388	1.272	1.29167	0.763	1.69288	0.000555105
O64820	At2g23110 OS=Arabidopsis thaliana GN=At2g23110 PE=2 SV=1 - [O64820_ARATH]	78.15	48.91	1	5	5	24	92	9.7	4.75	0.859	0.917	0.92	1.098	1.183	1.054	1.11167	0.898667	1.23702	0.00758406
Q9FFD2	Probable UDP-arabinopyranose mutase 5 OS=Arabidopsis thaliana GN=RGP5 PE=1 SV=1 - [RGP5_ARATH]	78.14	22.13	1	6	7	8	348	38.6	5.21	1.008	1.009	1.031	0.961	1.007	1.068	1.012	1.016	0.996063	0.90622
Q0WL80	UDP-glucose:glycoprotein glucosyltransferase OS=Arabidopsis thaliana GN=UGGT PE=1 SV=1 - [UGGG_ARATH]	78.12	9.18	2	13	13	13	1613	181.7	5.83	1.027	0.985	0.984	1.029	0.989	1	1.006	0.998667	1.00734	0.712389
Q93XZ7	At5g42570 OS=Arabidopsis thaliana GN=K16E1.4 PE=1 SV=1 - [Q93XZ7_ARATH]	77.96	18.35	3	4	4	10	218	24.5	9.32	1.041	1.14	1.126	0.886	0.915	0.889	0.896667	1.10233	0.813426	0.00310978
F4IYU3	7,8-dihydroneopterin aldolase OS=Arabidopsis thaliana GN=FOLB3 PE=3 SV=1 - [F4IYU3_ARATH]	77.85	11.54	2	1	1	2	156	17.6	6.79	0.998	0.905	0.901	1.011	1.224	1.057	1.09733	0.934667	1.17404	0.0869095
Q8H0Y1	Outer envelope pore protein 24B, chloroplastic OS=Arabidopsis thaliana GN=OEP24B PE=2 SV=1 - [OP24B_ARATH]	77.8	30.52	2	6	6	7	213	23.4	9.2	1.02	0.991	1.04	0.98	1.013	0.958	0.983667	1.017	0.967224	0.194245
P0DI75	Protein transport protein Sec61 subunit gamma-2 OS=Arabidopsis thaliana GN=SEC61G2 PE=1 SV=1 - [S61G2_ARATH]	77.72	23.19	1	2	2	6	69	7.7	9.72	1.268	0.923	1.078	0.79	1.046	0.812	0.882667	1.08967	0.810034	0.184064
Q9LZ41	60S ribosomal protein L35-4 OS=Arabidopsis thaliana GN=RPL35D PE=2 SV=1 - [RL354_ARATH]	77.64	39.84	3	2	6	12	123	14.3	10.92	0.968	0.903	0.944	1.079	1.088	1.072	1.07967	0.938333	1.15062	0.00193603
Q9FH46	Signal recognition particle subunit SRP68 OS=Arabidopsis thaliana GN=At5g61970 PE=2 SV=1 - [Q9FH46_ARATH]	77.56	19.67	6	10	10	11	605	68.8	8.84	1.058	0.951	1.046	0.921	0.929	0.988	0.946	1.01833	0.928969	0.144044
O23153	Putative amidase OS=Arabidopsis thaliana PE=2 SV=1 - [O23153_ARATH]	77.56	13.57	5	4	4	4	457	50.4	5.99	1.032	1.017	1.062	1.025	0.839	1.005	0.956333	1.037	0.922212	0.252735
Q9T077	At4g27530 OS=Arabidopsis thaliana GN=At4g27530 PE=2 SV=1 - [Q9T077_ARATH]	77.46	16.92	1	3	3	12	130	13.5	5.53	0.722	0.726	0.73	1.31	1.437	1.304	1.35033	0.726	1.85996	0.000136062
Q9SVA6	Developmentally-regulated G-protein 3 OS=Arabidopsis thaliana GN=DRG3 PE=1 SV=1 - [DRG3_ARATH]	77.38	21.14	1	6	6	10	369	41.1	8.41	0.971	0.951	0.949	1.025	0.974	1.025	1.008	0.957	1.05329	0.0501937
Q9FE18	Peptidyl-prolyl cis-trans isomerase NIMA-interacting 4 OS=Arabidopsis thaliana GN=T1K7.8 PE=2 SV=1 - [Q9FE18_ARATH]	77.36	30.28	1	3	3	5	142	14.8	9.52	0.658	0.806	0.919	1.128	1.212	1.242	1.194	0.794333	1.50315	0.00852154
Q96329	Acyl-coenzyme A oxidase 4, peroxisomal OS=Arabidopsis thaliana GN=ACX4 PE=1 SV=1 - [ACOX4_ARATH]	77.31	17.89	2	7	7	9	436	47.5	8.32	1.037	1.046	1.066	1.008	0.942	0.929	0.959667	1.04967	0.914258	0.0255145
O24653	Guanosine nucleotide diphosphate dissociation inhibitor 2 OS=Arabidopsis thaliana GN=GDI2 PE=2 SV=1 - [GDI2_ARATH]	77.19	43.24	1	9	15	24	444	49.5	5.74	1.019	1.049	1.051	0.945	0.939	0.955	0.946333	1.03967	0.910228	0.00119335
Q9FLQ4	Dihydrolipoyllysine-residue succinyltransferase component of 2-oxoglutarate dehydrogenase complex 1, mitochondrial OS=Arabidopsis thaliana GN=At5g55070 PE=2 SV=1 - [ODO2A_ARATH]	77.11	30.82	2	12	12	20	464	50.1	9.14	0.981	1.014	1.011	1.016	1.032	0.973	1.007	1.002	1.00499	0.819532
Q9ZPH2	Monothiol glutaredoxin-S17 OS=Arabidopsis thaliana GN=GRXS17 PE=1 SV=1 - [GRS17_ARATH]	77.02	20.29	2	7	7	8	488	53.1	5.08	1.025	0.995	1.017	0.993	0.994	0.997	0.994667	1.01233	0.982549	0.122636
Q8GRX2	Eukaryotic translation initiation factor 3 subunit J OS=Arabidopsis thaliana GN=At5g37475 PE=1 SV=1 - [Q8GRX2_ARATH]	76.94	13.33	1	2	2	3	225	25.2	4.82	0.885	1.018	0.917	1.012	1.142	1.105	1.08633	0.94	1.15567	0.0583406
Q9FFE6	Probable acyl-activating enzyme 5, peroxisomal OS=Arabidopsis thaliana GN=AAE5 PE=2 SV=1 - [AAE5_ARATH]	76.91	16.67	4	6	6	6	552	60.7	6.98	0.964	0.964	0.931	0.983	1.092	1.105	1.06	0.953	1.11228	0.0563535
Q9XI11	F8K7.9 OS=Arabidopsis thaliana GN=F8K7.9 PE=2 SV=1 - [Q9XI11_ARATH]	76.86	22.19	1	11	12	18	703	77.2	9.29	0.997	0.99	0.963	1.033	1.029	1.097	1.053	0.983333	1.07085	0.0458645
Q9SDS7	V-type proton ATPase subunit C OS=Arabidopsis thaliana GN=VHA-C PE=1 SV=1 - [VATC_ARATH]	76.75	26.67	2	9	9	14	375	42.6	5.54	1.073	1.114	1.101	0.891	0.909	0.904	0.901333	1.096	0.822384	0.000124265
Q9ASY9	Bifunctional TENA-E protein OS=Arabidopsis thaliana GN=TENA_E PE=1 SV=3 - [TENAE_ARATH]	76.57	21.27	1	5	5	8	221	25.1	5	0.97	1.085	1.018	0.945	0.986	0.97	0.967	1.02433	0.944029	0.180811
Q8GXQ8	Putative inosine-5'-monophosphate dehydrogenase OS=Arabidopsis thaliana GN=At1g16350/F3O9_15 PE=2 SV=1 - [Q8GXQ8_ARATH]	76.51	24.86	4	8	8	11	350	37.7	7.84	0.972	1.033	1.014	0.993	0.936	0.94	0.956333	1.00633	0.950315	0.123952
Q9XFH8	Thioredoxin F1, chloroplastic OS=Arabidopsis thaliana GN=At3g02730 PE=1 SV=2 - [TRXF1_ARATH]	76.4	11.24	1	2	2	12	178	19.3	8.92	0.813	0.951	0.846	1.145	1.244	1.15	1.17967	0.87	1.35594	0.00416457
Q940D1	At1g64110/F22C12_22 OS=Arabidopsis thaliana GN=At1g64110 PE=2 SV=1 - [Q940D1_ARATH]	76.4	13.47	34	10	10	13	824	91.9	6.84	0.954	1.088	0.991	0.99	1.018	0.962	0.99	1.011	0.979228	0.65159
Q9SIV2	26S proteasome non-ATPase regulatory subunit 2 homolog A OS=Arabidopsis thaliana GN=RPN1A PE=1 SV=2 - [PSD2A_ARATH]	76.33	19.3	3	15	15	21	891	98.1	5.1	0.986	1.036	1.012	1.004	1.016	0.994	1.00467	1.01133	0.993408	0.69433
Q949X7	Diaminopimelate decarboxylase 1, chloroplastic OS=Arabidopsis thaliana GN=LYSA1 PE=1 SV=1 - [DCDA1_ARATH]	76.21	13.43	1	1	5	6	484	53.5	6.98	0.892	1.001	0.995	1.041	1.198	0.977	1.072	0.962667	1.11357	0.216518
Q9FNN5	NADH dehydrogenase [ubiquinone] flavoprotein 1, mitochondrial OS=Arabidopsis thaliana GN=At5g08530 PE=2 SV=1 - [NDUV1_ARATH]	76.14	18.31	1	7	7	12	486	53.4	8.16	0.98	1.028	1.046	0.997	1.004	0.97	0.990333	1.018	0.972823	0.281762
Q9ZW31	17.6 kDa class I heat shock protein 2 OS=Arabidopsis thaliana GN=HSP17.6B PE=2 SV=1 - [HS17B_ARATH]	76.13	18.95	1	2	3	13	153	17.6	6.81	0.924	1.079	0.872	1.118	1.092	1.023	1.07767	0.958333	1.12452	0.155661
Q42418	Profilin-2 OS=Arabidopsis thaliana GN=PRO2 PE=2 SV=1 - [PROF2_ARATH]	76.02	38.93	2	3	4	18	131	14	5.02	1.031	1.019	1.011	0.98	1.039	1.019	1.01267	1.02033	0.992486	0.696353
Q9FIX1	AIG2-like protein OS=Arabidopsis thaliana GN=At5g39730 PE=2 SV=1 - [Q9FIX1_ARATH]	75.99	23.26	1	3	3	4	172	20	5.1	1.115	1.004	0.934	0.971	1.03	0.942	0.981	1.01767	0.96397	0.566143
Q9ZQ96	UDP-glycosyltransferase 73C3 OS=Arabidopsis thaliana GN=UGT73C3 PE=2 SV=1 - [U73C3_ARATH]	75.97	10.89	3	4	4	4	496	55.9	5.86	0.9	0.79	0.828	1.241	1.226	1.18	1.21567	0.839333	1.44837	0.000532385
Q9M1B9	Probable fructokinase-4 OS=Arabidopsis thaliana GN=At3g59480 PE=2 SV=1 - [SCRK4_ARATH]	75.96	11.96	2	1	4	9	326	35	5.36	1.245	1.13	1.038	0.973	0.865	0.716	0.851333	1.13767	0.748315	0.0401144
Q9T0K7	3-hydroxyisobutyryl-CoA hydrolase-like protein 3, mitochondrial OS=Arabidopsis thaliana GN=At4g13360 PE=1 SV=2 - [HIBC6_ARATH]	75.9	19.48	2	7	7	10	421	46.2	6.67	1.017	1.013	1.049	0.985	0.978	0.937	0.966667	1.02633	0.941864	0.0338012
Q8LA13	DEAD-box ATP-dependent RNA helicase 11 OS=Arabidopsis thaliana GN=RH11 PE=1 SV=1 - [RH11_ARATH]	75.79	13.73	4	3	8	11	612	66	6.68	1.031	0.987	0.907	0.778	1.019	1.08	0.959	0.975	0.98359	0.879544
Q8L456	Transaldolase-like protein (Fragment) OS=Arabidopsis thaliana PE=4 SV=1 - [Q8L456_ARATH]	75.77	24.53	15	8	8	12	375	40.7	7.15	1.083	1.039	1.041	0.973	0.952	0.942	0.955667	1.05433	0.906418	0.00438999
Q8LBG6	Putative NADPH dependent mannose 6-phosphate reductase OS=Arabidopsis thaliana PE=2 SV=1 - [Q8LBG6_ARATH]	75.76	18.45	3	3	6	9	309	34.9	6.24	1.124	1.101	1.078	0.88	0.832	0.873	0.861667	1.101	0.782622	0.000280058
Q9LX88	40S ribosomal protein S15a-4 OS=Arabidopsis thaliana GN=RPS15AD PE=2 SV=3 - [R15A4_ARATH]	75.68	66.92	1	2	9	19	130	14.8	9.94	0.918	0.809	0.967	0.662	1.132	1.486	1.09333	0.898	1.21752	0.466846
F4JQ90	FGGY family of carbohydrate kinase OS=Arabidopsis thaliana GN=At4g30310 PE=1 SV=1 - [F4JQ90_ARATH]	75.53	8.81	6	4	4	4	579	62.5	6.15	1.011	0.946	0.986	0.91	0.888	1.227	1.00833	0.981	1.02786	0.817838
Q9C514	40S ribosomal protein S7-1 OS=Arabidopsis thaliana GN=RPS7A PE=2 SV=1 - [RS71_ARATH]	75.24	29.32	1	5	5	6	191	21.9	9.8	1.061	1.072	1.13	0.966	0.956	0.938	0.953333	1.08767	0.876494	0.00422868
P56820	Eukaryotic translation initiation factor 3 subunit D OS=Arabidopsis thaliana GN=TIF3D1 PE=1 SV=1 - [EIF3D_ARATH]	75.22	16.58	2	3	8	12	591	66.7	5.77	1.071	1.032	1.018	0.941	1	0.935	0.958667	1.04033	0.9215	0.0352465
F4JWV6	Glucuronidase 3 OS=Arabidopsis thaliana GN=GUS3 PE=4 SV=1 - [F4JWV6_ARATH]	75.03	15.45	3	4	4	7	382	42.6	5.58	0.905	0.922	0.903	1.025	1.033	1.218	1.092	0.91	1.2	0.0452929
Q9MAP3	50S ribosomal protein L11, chloroplastic OS=Arabidopsis thaliana GN=RPL11 PE=2 SV=1 - [RK11_ARATH]	75	27.93	2	6	6	9	222	23.1	9.66	0.913	0.955	0.894	1.086	1.145	1.061	1.09733	0.920667	1.19189	0.00454316
Q9SIF2	Heat shock protein 90-5, chloroplastic OS=Arabidopsis thaliana GN=HSP90-5 PE=1 SV=1 - [HS905_ARATH]	74.95	13.85	2	6	9	10	780	88.6	5.01	1.13	0.957	0.994	0.847	0.835	0.992	0.891333	1.027	0.8679	0.13617
F4JG94	Thioredoxin M2 OS=Arabidopsis thaliana GN=ATHM2 PE=4 SV=1 - [F4JG94_ARATH]	74.94	88.89	2	6	6	14	72	7.9	8.46	0.852	0.838	0.863	1.235	1.221	1.16	1.20533	0.851	1.41637	0.000125227
Q9LQP1	Dessication-induced 1VOC-like protein OS=Arabidopsis thaliana GN=F24B9.26 PE=2 SV=1 - [Q9LQP1_ARATH]	74.9	66.42	1	8	8	23	137	15.4	6.68	1.128	1.11	1.144	0.851	0.84	0.832	0.841	1.12733	0.746008	1.41999e-05
P37702	Myrosinase 1 OS=Arabidopsis thaliana GN=TGG1 PE=1 SV=1 - [BGL38_ARATH]	74.88	7.39	1	3	3	4	541	61.1	5.92	1.125	1.039	0.999	0.937	1.023	0.887	0.949	1.05433	0.900095	0.124899
Q9LNE6	UDP-glycosyltransferase 89C1 OS=Arabidopsis thaliana GN=UGT89C1 PE=2 SV=1 - [U89C1_ARATH]	74.7	19.08	3	7	7	9	435	48.1	6.18	1.063	1.096	1.045	0.91	0.966	0.948	0.941333	1.068	0.881398	0.00470962
O82179	Glycine cleavage system H protein 2, mitochondrial OS=Arabidopsis thaliana GN=GDH2 PE=2 SV=1 - [GCSH2_ARATH]	74.59	30.13	1	3	3	5	156	17.1	5.11	1.133	0.939	1.07	0.923	1.047	0.926	0.965333	1.04733	0.921706	0.30785
Q9SJT9	Coatomer subunit alpha-2 OS=Arabidopsis thaliana GN=At2g21390 PE=2 SV=1 - [COPA2_ARATH]	74.58	26.27	2	9	26	32	1218	136.4	6.92	1.12	1.066	1.058	0.902	0.939	0.871	0.904	1.08133	0.836005	0.00304394
Q9T0P4	Ferredoxin-dependent glutamate synthase 2, chloroplastic OS=Arabidopsis thaliana GN=GLU2 PE=1 SV=2 - [GLTB2_ARATH]	74.54	7.24	3	9	9	11	1629	177.6	7.01	1.017	1.059	0.963	1.06	0.944	1.012	1.00533	1.013	0.992432	0.86908
O04603	50S ribosomal protein L5, chloroplastic OS=Arabidopsis thaliana GN=RPL5 PE=2 SV=1 - [RK5_ARATH]	74.43	24.81	1	6	6	7	262	28.3	9.99	0.906	0.882	0.94	1.113	1.015	1.135	1.08767	0.909333	1.19611	0.0117015
Q9SZA3	Eukaryotic translation initiation factor 3 subunit K OS=Arabidopsis thaliana GN=TIF3K1 PE=2 SV=1 - [EIF3K_ARATH]	74.41	13.72	1	3	3	4	226	25.7	4.96	0.974	1.033	1.055	0.912	0.93	0.997	0.946333	1.02067	0.927172	0.103714
O81299	AT4g02340 protein OS=Arabidopsis thaliana GN=T14P8.15 PE=2 SV=1 - [O81299_ARATH]	74.39	8.33	1	2	2	3	324	36.6	6.76	1.43	0.944	0.993	0.814	0.87	1.012	0.898667	1.12233	0.800713	0.24754
Q9FE58	60S ribosomal protein L22-3 OS=Arabidopsis thaliana GN=RPL22C PE=2 SV=1 - [RL223_ARATH]	74.21	49.19	1	2	6	17	124	14	9.55	1.078	1.001	0.925	1.1	1.053	0.892	1.015	1.00133	1.01365	0.867619
F4IVZ7	Ribulose bisphosphate carboxylase/oxygenase activase OS=Arabidopsis thaliana GN=RCA PE=1 SV=1 - [F4IVZ7_ARATH]	74.17	20.18	5	7	7	9	441	48.5	7.69	0.907	0.939	0.922	1.147	1.031	0.993	1.057	0.922667	1.14559	0.0466702
Q9LY87	E3 ubiquitin-protein ligase RGLG2 OS=Arabidopsis thaliana GN=RGLG2 PE=1 SV=1 - [RGLG2_ARATH]	74.17	10.68	2	3	3	3	468	51.5	5.62	1.124	0.82	1.013	0.986	1.023	1.187	1.06533	0.985667	1.08083	0.502326
Q93ZK4	AT3g26420/F20C19_14 OS=Arabidopsis thaliana PE=2 SV=1 - [Q93ZK4_ARATH]	74.16	20.95	2	3	3	12	148	16.5	8.18	0.814	0.855	0.853	1.149	1.387	1.152	1.22933	0.840667	1.46233	0.00827462
Q8RXF8	Mitochondrial Rho GTPase 1 OS=Arabidopsis thaliana GN=MIRO1 PE=1 SV=1 - [MIRO1_ARATH]	73.93	11.42	1	6	6	8	648	72.3	5.3	1.002	1.085	1.064	0.881	0.955	1.059	0.965	1.05033	0.918756	0.210821
Q93ZB2	Ent-kaurene oxidase, chloroplastic OS=Arabidopsis thaliana GN=KO PE=1 SV=2 - [KO1_ARATH]	73.81	15.32	1	8	8	13	509	58.1	8.12	0.997	1.088	1.012	0.947	1.008	0.92	0.958333	1.03233	0.928318	0.12589
Q9FMN4	Thioredoxin-like protein Clot OS=Arabidopsis thaliana GN=At5g42850 PE=2 SV=1 - [TCLOT_ARATH]	73.43	44.78	1	5	5	9	134	15.2	6.54	0.709	0.785	0.823	1.298	1.386	1.199	1.29433	0.772333	1.67587	0.00119838
Q8VYN9	Universal stress protein PHOS32 OS=Arabidopsis thaliana GN=PHOS32 PE=1 SV=1 - [PHO32_ARATH]	73.43	28.51	5	5	6	9	242	26.2	6.57	0.889	1.011	0.95	1.056	1.176	0.983	1.07167	0.95	1.12807	0.140738
Q9SA85	At1g30700 OS=Arabidopsis thaliana GN=T5I8.15 PE=2 SV=1 - [Q9SA85_ARATH]	73.42	18.41	1	9	9	9	527	59.5	9.39	0.947	0.994	1.031	0.995	0.982	0.979	0.985333	0.990667	0.994616	0.840226
Q9FZA2	Non-classical arabinogalactan protein 31 OS=Arabidopsis thaliana GN=AGP31 PE=1 SV=1 - [AGP31_ARATH]	73.4	16.99	1	9	9	26	359	38.5	10.17	1.047	1.193	1.064	0.963	0.93	0.898	0.930333	1.10133	0.844734	0.0263922
O23157	AT4g37300/C7A10_60 OS=Arabidopsis thaliana GN=C7A10.60 PE=1 SV=1 - [O23157_ARATH]	73.3	24.28	1	3	3	5	173	18.8	4.68	0.916	0.982	0.942	1.055	1.163	1.063	1.09367	0.946667	1.15528	0.0207736
Q8VXY9	Ureidoglycolate hydrolase OS=Arabidopsis thaliana GN=UAH PE=1 SV=1 - [UAH_ARATH]	73.28	24.16	1	10	10	14	476	51.5	5.64	0.99	0.965	1.007	0.989	0.98	1.041	1.00333	0.987333	1.01621	0.517831
O23299	Enoyl-CoA delta isomerase 2, peroxisomal OS=Arabidopsis thaliana GN=ECI2 PE=1 SV=1 - [ECI2_ARATH]	73.27	12.92	1	3	3	5	240	25.8	8.4	1.125	0.952	0.981	1.191	0.902	0.889	0.994	1.01933	0.975147	0.832362
P56773	Cytochrome b6 OS=Arabidopsis thaliana GN=petB PE=1 SV=1 - [CYB6_ARATH]	73.17	15.35	1	3	3	5	215	24.1	8.76	1.136	1.251	1.204	0.801	0.823	0.797	0.807	1.197	0.674185	0.000342991
Q9SUT0	Probable cysteine protease RDL4 OS=Arabidopsis thaliana GN=RDL4 PE=2 SV=1 - [RDL4_ARATH]	73.14	30.22	2	11	11	16	364	39.9	6.02	1.048	1.098	1.102	0.92	0.889	0.91	0.906333	1.08267	0.837131	0.000849554
P45434	Translocon-associated protein subunit alpha OS=Arabidopsis thaliana GN=At2g21160 PE=2 SV=3 - [SSRA_ARATH]	73.08	12.4	3	2	2	3	258	28.1	5.21	1.132	1.115	1.233	0.821	0.839	0.829	0.829667	1.16	0.71523	0.000888017
O48773	Protein disulfide-isomerase 2-3 OS=Arabidopsis thaliana GN=PDIL2-3 PE=2 SV=1 - [PDI23_ARATH]	73.08	12.95	1	6	6	11	440	47.7	5.85	1.092	1.113	1.079	0.862	0.957	0.814	0.877667	1.09467	0.801766	0.00735022
Q9FEF8	Probable mediator of RNA polymerase II transcription subunit 36b OS=Arabidopsis thaliana GN=MED36B PE=1 SV=1 - [MD36B_ARATH]	73.01	39.61	3	11	11	16	308	32.8	10.14	0.91	1.062	0.938	1.023	1.109	1.043	1.05833	0.97	1.09107	0.173722
Q42601	Carbamoyl-phosphate synthase large chain, chloroplastic OS=Arabidopsis thaliana GN=CARB PE=1 SV=1 - [CARB_ARATH]	72.9	10.03	3	10	10	14	1187	129.9	5.73	1.025	1.009	1.046	0.949	0.965	0.96	0.958	1.02667	0.933117	0.00422167
F4ITZ4	Nuclear transcription factor Y subunit B-1 OS=Arabidopsis thaliana GN=NF-YB1 PE=1 SV=1 - [F4ITZ4_ARATH]	72.86	16.55	5	2	2	2	139	14.9	5.08	1.047	0.984	0.916	0.968	1.031	1.081	1.02667	0.982333	1.04513	0.425314
Q93V74	AT4g34180/F28A23_60 OS=Arabidopsis thaliana GN=At4g34180 PE=2 SV=1 - [Q93V74_ARATH]	72.7	46.27	3	10	11	16	255	28.4	6.44	1.073	1.038	1.064	0.945	0.927	0.858	0.91	1.05833	0.859843	0.00650756
A8MR12	26S proteasome non-ATPase regulatory subunit 14 OS=Arabidopsis thaliana GN=At5g23540 PE=4 SV=1 - [A8MR12_ARATH]	72.69	27.8	2	7	7	11	259	29.2	6.54	1.044	0.995	1.081	0.936	0.983	0.986	0.968333	1.04	0.93109	0.0733532
Q9T010	Probable protein phosphatase 2C 54 OS=Arabidopsis thaliana GN=At4g11040 PE=2 SV=1 - [P2C54_ARATH]	72.61	13.22	2	3	3	5	295	31.8	6.79	1.07	0.997	1.125	1.003	1.013	0.929	0.981667	1.064	0.922619	0.145058
Q8W453	Putative lipid-transfer protein DIR1 OS=Arabidopsis thaliana GN=DIR1 PE=1 SV=1 - [DIRL1_ARATH]	72.45	19.61	1	1	1	2	102	10.7	4.94	0.862	0.843	0.95	1.185	1.162	1.144	1.16367	0.885	1.31488	0.00135257
Q501F7	At1g21440 OS=Arabidopsis thaliana GN=At1g21440 PE=2 SV=1 - [Q501F7_ARATH]	72.4	27.08	4	8	8	12	336	36.3	7.15	0.994	0.984	1	0.983	1.022	1.041	1.01533	0.992667	1.02283	0.269503
Q84TF0	Aldo-keto reductase family 4 member C10 OS=Arabidopsis thaliana GN=AKR4C10 PE=1 SV=1 - [AKRCA_ARATH]	72.36	22.61	1	2	5	6	314	34.9	6.65	0.942	0.798	1.042	0.991	1.021	1.264	1.092	0.927333	1.17757	0.214581
Q9FFA4	Putative uncharacterized protein OS=Arabidopsis thaliana PE=4 SV=1 - [Q9FFA4_ARATH]	72.32	21.21	3	1	1	2	66	7.6	9.04	1.011	0.93	0.902	1.022	1.208	0.992	1.074	0.947667	1.13331	0.167589
Q8W4F3	Glutamine--tRNA ligase, cytoplasmic OS=Arabidopsis thaliana GN=OVA9 PE=2 SV=1 - [SYQ_ARATH]	72.22	21.13	2	14	14	20	795	91.2	6.52	0.991	1.003	1.017	1.038	0.976	1.035	1.01633	1.00367	1.01262	0.588062
Q9XFS9	1-deoxy-D-xylulose 5-phosphate reductoisomerase, chloroplastic OS=Arabidopsis thaliana GN=DXR PE=2 SV=2 - [DXR_ARATH]	72.09	10.27	2	3	3	4	477	51.9	7.05	0.97	0.974	0.989	0.942	0.889	1.331	1.054	0.977667	1.07808	0.613251
Q42139	AT4g32260/F10M6_100 OS=Arabidopsis thaliana GN=F10M6.100 PE=1 SV=2 - [Q42139_ARATH]	72.08	17.81	3	3	3	4	219	23.9	5.86	1.162	1.182	1.04	0.851	0.874	0.869	0.864667	1.128	0.766548	0.00422793
O80929	60S ribosomal protein L36-1 OS=Arabidopsis thaliana GN=RPL36A PE=2 SV=1 - [RL361_ARATH]	71.88	30.97	5	1	5	11	113	12.7	11.75	1.337	0.795	1.014	0.923	1.026	0.896	0.948333	1.04867	0.904323	0.569966
O23034	Ubiquitin-like modifier-activating enzyme 5 OS=Arabidopsis thaliana GN=At1g05350 PE=3 SV=2 - [UBA5_ARATH]	71.83	15.55	1	6	6	8	431	47	4.69	1.035	1.055	1.005	1.024	0.959	1.005	0.996	1.03167	0.965428	0.213832
Q56WN1	Glutamine synthetase cytosolic isozyme 1-1 OS=Arabidopsis thaliana GN=GLN1-1 PE=1 SV=2 - [GLN11_ARATH]	71.63	18.82	3	3	6	6	356	39.1	5.47	0.954	1.031	0.929	0.986	1.07	1.037	1.031	0.971333	1.06143	0.202931
C0Z3C1	AT3G06850 protein OS=Arabidopsis thaliana GN=At3g06850 PE=2 SV=1 - [C0Z3C1_ARATH]	70.98	10.55	3	3	3	3	455	49.7	6.61	0.969	1.024	0.978	1.044	0.999	0.992	1.01167	0.990333	1.02154	0.416601
Q9FFG6	AT5g05480/MOP10_2 OS=Arabidopsis thaliana GN=At5g05480 PE=2 SV=1 - [Q9FFG6_ARATH]	70.93	18.59	1	9	9	11	608	68.4	5.58	1.073	0.98	1.036	0.992	0.888	0.997	0.959	1.02967	0.931369	0.188615
Q38970	Acetyl-CoA carboxylase 1 OS=Arabidopsis thaliana GN=ACC1 PE=1 SV=1 - [ACC1_ARATH]	70.85	5.5	2	9	10	10	2254	251.2	6.52	1.055	1.116	1.073	0.948	0.942	0.933	0.941	1.08133	0.870222	0.00165761
P48578	Serine/threonine-protein phosphatase PP2A-3 catalytic subunit OS=Arabidopsis thaliana GN=PP2A3 PE=2 SV=1 - [PP2A3_ARATH]	70.47	19.17	11	4	4	6	313	35.7	5.24	0.919	1.008	1.029	1.095	0.98	1.055	1.04333	0.985333	1.05886	0.290641
Q96251	ATP synthase subunit O, mitochondrial OS=Arabidopsis thaliana GN=At5g13450 PE=1 SV=2 - [ATPO_ARATH]	70.46	43.28	3	9	9	16	238	26.3	9.23	1.02	1.008	1.048	0.952	0.938	0.922	0.937333	1.02533	0.914174	0.00389725
Q67YV9	Putative vesicle-associated membrane protein, synaptobrevin 7B OS=Arabidopsis thaliana GN=VAMP721 PE=2 SV=1 - [Q67YV9_ARATH]	70.42	38.67	19	7	8	14	181	20.5	9.16	1.073	1	1.111	0.912	0.939	0.898	0.916333	1.06133	0.863379	0.0139618
P34893	10 kDa chaperonin OS=Arabidopsis thaliana GN=CPN10 PE=3 SV=1 - [CH10_ARATH]	70.4	64.29	1	6	6	19	98	10.8	7.42	0.653	0.592	0.697	1.482	1.608	1.42	1.50333	0.647333	2.32235	0.000171285
Q8L7S6	Beta-hexosaminidase 3 OS=Arabidopsis thaliana GN=HEXO3 PE=1 SV=1 - [HEXO3_ARATH]	70.39	16.64	2	8	9	12	535	60	8.15	1.02	1.049	1.002	0.98	1.008	0.937	0.975	1.02367	0.952458	0.120946
Q9SR13	Flowering locus K homology domain OS=Arabidopsis thaliana GN=FLK PE=1 SV=1 - [FLK_ARATH]	70.36	8.84	1	4	4	5	577	63.4	4.68	1.045	1.068	1.103	0.968	0.952	0.908	0.942667	1.072	0.879353	0.00628296
Q08A62	At1g66250 OS=Arabidopsis thaliana PE=2 SV=1 - [Q08A62_ARATH]	70.29	3.56	2	1	1	4	505	54.2	5.8	1.103	1.083	1.144	0.883	0.833	0.925	0.880333	1.11	0.793093	0.00201591
Q9XI98	Ras-related protein RABG3e OS=Arabidopsis thaliana GN=RABG3E PE=2 SV=1 - [RAG3E_ARATH]	70.29	35.44	3	2	7	13	206	23	5.07	1.08	1.036	1.031	0.863	0.992	0.97	0.941667	1.049	0.89768	0.0661137
Q9FPJ7	At2g27680 OS=Arabidopsis thaliana GN=At2g27680/F15K20.22 PE=2 SV=1 - [Q9FPJ7_ARATH]	70.09	11.35	2	3	3	4	326	36.9	7.53	1.122	0.919	1.111	1.09	0.758	0.883	0.910333	1.05067	0.866434	0.296964
P42733	40S ribosomal protein S11-3 OS=Arabidopsis thaliana GN=RPS11C PE=2 SV=2 - [RS113_ARATH]	70.08	34.59	1	2	6	12	159	17.7	10.61	1.028	0.977	1.039	1.007	0.963	0.995	0.988333	1.01467	0.974047	0.319352
Q9FVC4	Aspartate-semialdehyde dehydrogenase (Fragment) OS=Arabidopsis thaliana GN=ASDH PE=2 SV=1 - [Q9FVC4_ARATH]	69.94	28.53	3	6	6	8	340	36.6	5.58	1.046	0.879	0.963	1.024	1.044	1.059	1.04233	0.962667	1.08276	0.181152
Q9AV97	2-dehydro-3-deoxyphosphooctonate aldolase 1 OS=Arabidopsis thaliana GN=KDSA1 PE=1 SV=2 - [KDSA1_ARATH]	69.93	27.59	4	6	6	8	290	31.6	6.79	1.067	1.003	1.027	1.001	0.993	0.975	0.989667	1.03233	0.95867	0.102091
O80622	Expansin-A15 OS=Arabidopsis thaliana GN=EXPA15 PE=2 SV=2 - [EXP15_ARATH]	69.65	8.3	1	1	1	3	253	27.1	9.04	0.932	1.079	0.822	0.985	0.95	1.121	1.01867	0.944333	1.07872	0.459398
Q9S834	ATP-dependent Clp protease proteolytic subunit 5, chloroplastic OS=Arabidopsis thaliana GN=CLPP5 PE=1 SV=1 - [CLPP5_ARATH]	69.6	12.08	1	3	3	4	298	32.3	8.24	1.105	1.07	1.146	0.862	0.91	0.884	0.885333	1.107	0.799759	0.00103495
Q9LUE4	11-beta-hydroxysteroid dehydrogenase-like 6 OS=Arabidopsis thaliana GN=HSD6 PE=2 SV=1 - [HSD6_ARATH]	69.57	18.42	1	5	5	7	342	38	7.84	0.967	0.973	0.853	1.119	1.108	0.981	1.06933	0.931	1.14859	0.0790871
Q43725	Cysteine synthase, mitochondrial OS=Arabidopsis thaliana GN=OASC PE=1 SV=3 - [CYSKM_ARATH]	69.36	13.95	9	4	6	11	430	45.8	8.18	1.005	0.977	0.953	1.09	0.959	1.098	1.049	0.978333	1.07223	0.211029
Q94A32	Protein FATTY ACID EXPORT 2, chloroplastic OS=Arabidopsis thaliana GN=FAX2 PE=2 SV=1 - [FAX2_ARATH]	69.32	8.33	1	1	1	1	240	24.8	9.11	0.945	1.011	1.064	0.902	1.121	1.013	1.012	1.00667	1.0053	0.944496
Q9C602	Putative uncharacterized protein T24P22.6 OS=Arabidopsis thaliana GN=T24P22.6 PE=4 SV=1 - [Q9C602_ARATH]	69.21	4.66	2	2	2	4	686	76.8	7.39	0.956	0.958	1.031	1.162	1.021	0.985	1.056	0.981667	1.07572	0.278828
Q93V72	PLASMODESMATA CALLOSE-BINDING PROTEIN 4 OS=Arabidopsis thaliana GN=PDCB4 PE=1 SV=1 - [PDCB4_ARATH]	69.19	9.91	2	2	2	4	222	22.1	5.92	0.84	0.815	0.849	1.191	1.314	1.192	1.23233	0.834667	1.47644	0.000699376
Q94JY0	Cyclin delta-3 OS=Arabidopsis thaliana GN=F28A23.80 PE=2 SV=1 - [Q94JY0_ARATH]	69.15	13.33	4	3	3	5	330	36.9	6	0.959	0.954	0.949	0.982	1.009	1.039	1.01	0.954	1.0587	0.0285521
O82782	1-(5-phosphoribosyl)-5-[(5-phosphoribosylamino)methylideneamino] imidazole-4-carboxamide isomerase, chloroplastic OS=Arabidopsis thaliana GN=HISN3 PE=2 SV=1 - [HIS3_ARATH]	69.1	8.88	2	2	2	2	304	33.3	7.06	1.19	1.033	0.946	0.882	0.949	0.974	0.935	1.05633	0.885137	0.187897
O82629	V-type proton ATPase subunit G2 OS=Arabidopsis thaliana GN=VHA-G2 PE=1 SV=2 - [VATG2_ARATH]	69.04	20.75	1	2	2	2	106	11.7	5.58	0.939	0.957	1.086	0.963	1.264	0.869	1.032	0.994	1.03823	0.781026
Q8VZT0	Putative H/ACA ribonucleoprotein complex subunit 1-like protein 1 OS=Arabidopsis thaliana GN=At3g03920 PE=2 SV=1 - [NLAL1_ARATH]	69.03	25.25	2	4	4	12	202	21	11.41	0.695	0.718	0.701	1.282	1.481	1.269	1.344	0.704667	1.90728	0.000752273
Q56XH1	Putative uncharacterized protein At4g24795 OS=Arabidopsis thaliana GN=At4g24795 PE=2 SV=1 - [Q56XH1_ARATH]	68.9	18.09	3	11	11	13	702	77.3	5.16	1.065	1.063	1.064	0.947	0.925	0.93	0.934	1.064	0.87782	4.11843e-05
Q9SEE5	Galactokinase OS=Arabidopsis thaliana GN=GAL1 PE=1 SV=2 - [GALK1_ARATH]	68.72	17.74	1	7	7	7	496	54.3	5.96	0.975	1.005	1.003	1.036	1.063	1.007	1.03533	0.994333	1.04123	0.0952359
Q9C9Y5	Putative elongation factor P (EF-P); 66839-65711 OS=Arabidopsis thaliana GN=F17O14.21 PE=3 SV=1 - [Q9C9Y5_ARATH]	68.68	34.24	2	5	5	7	184	20.6	5.48	1.001	1.141	1.064	0.871	0.945	0.875	0.897	1.06867	0.839364	0.0218366
Q9LW00	Methyl-CpG-binding domain-containing protein 11 OS=Arabidopsis thaliana GN=MBD11 PE=1 SV=1 - [MBD11_ARATH]	68.67	26.38	1	5	7	11	254	27.6	4.88	0.853	0.928	0.924	1.124	1.175	1.104	1.13433	0.901667	1.25804	0.00195787
Q9C9W5	Glycerate dehydrogenase HPR, peroxisomal OS=Arabidopsis thaliana GN=HPR PE=1 SV=1 - [HPR1_ARATH]	68.5	19.17	1	7	7	8	386	42.2	7.15	1.015	0.946	0.915	1.028	1.002	0.986	1.00533	0.958667	1.04868	0.218357
P42758	Dehydrin Xero 2 OS=Arabidopsis thaliana GN=XERO2 PE=2 SV=1 - [XERO2_ARATH]	68.46	46.11	2	5	6	21	193	20.9	9.38	0.616	0.655	0.63	1.497	1.66	1.309	1.48867	0.633667	2.34929	0.00111015
P49078	Asparagine synthetase [glutamine-hydrolyzing] 1 OS=Arabidopsis thaliana GN=ASN1 PE=2 SV=2 - [ASNS1_ARATH]	68.46	19.01	6	8	8	10	584	65.6	6.64	0.962	1.068	0.995	0.964	1.01	0.98	0.984667	1.00833	0.976529	0.525815
Q42600	Cytochrome P450 84A1 OS=Arabidopsis thaliana GN=CYP84A1 PE=1 SV=1 - [C84A1_ARATH]	68.32	11.35	5	4	4	6	520	58.7	6.8	1.054	1.009	1.108	0.938	1.005	0.912	0.951667	1.057	0.900347	0.0573065
F4KIB2	Transmembrane 9 superfamily member 8 OS=Arabidopsis thaliana GN=TMN8 PE=2 SV=1 - [TMN8_ARATH]	68.31	9.72	5	4	5	5	648	74.4	7.96	1.037	1.097	1.003	0.876	1.016	0.858	0.916667	1.04567	0.876634	0.0863746
Q8L7A9	AP-4 complex subunit epsilon OS=Arabidopsis thaliana GN=At1g31730 PE=1 SV=1 - [AP4E_ARATH]	68.29	5.54	1	5	5	7	938	103.7	5.53	0.992	1.07	0.98	0.989	1.014	1.033	1.012	1.014	0.998028	0.951588
B9DHG8	AT1G03210 protein OS=Arabidopsis thaliana GN=At1g03210 PE=2 SV=1 - [B9DHG8_ARATH]	68.22	4.55	2	1	1	6	286	31.7	5.03	1.187	1.205	0.998	0.725	1.088	0.844	0.885667	1.13	0.783776	0.123815
Q9LF71	Phosphoglucomutase-like protein OS=Arabidopsis thaliana GN=K10A8_10 PE=4 SV=1 - [Q9LF71_ARATH]	68.21	7.19	3	4	4	6	570	61.6	6.18	1.072	1.009	0.997	1.028	0.959	0.992	0.993	1.026	0.967836	0.341908
O65902	Cyclase-associated protein 1 OS=Arabidopsis thaliana GN=CAP1 PE=2 SV=1 - [ACAP1_ARATH]	68.1	11.76	1	5	5	6	476	50.9	6.65	1.069	1.007	1.089	1.013	0.882	0.949	0.948	1.055	0.898578	0.0768868
Q9ZPW6	Late embryogenesis abundant domain-containing protein OS=Arabidopsis thaliana GN=At2g18340 PE=2 SV=1 - [Q9ZPW6_ARATH]	68.09	41.67	2	15	17	23	456	49.8	5.67	0.818	0.868	0.85	1.149	1.306	1.179	1.21133	0.845333	1.43297	0.00189418
O65686	AT4g34620/T4L20_200 OS=Arabidopsis thaliana GN=T4L20.200 PE=2 SV=1 - [O65686_ARATH]	67.99	33.63	1	3	3	5	113	12.7	9.8	0.777	0.852	0.869	1.037	1.217	1.303	1.18567	0.832667	1.42394	0.0132934
Q93VB0	Nucleic acid-binding, OB-fold-like protein OS=Arabidopsis thaliana GN=At2g40660 PE=2 SV=1 - [Q93VB0_ARATH]	67.81	28.53	3	11	11	14	389	42.1	7.4	0.917	0.982	0.932	1.019	1.084	1.051	1.05133	0.943667	1.11409	0.0166404
P56771	Cytochrome f OS=Arabidopsis thaliana GN=petA PE=3 SV=1 - [CYF_ARATH]	67.74	26.88	1	7	7	10	320	35.3	8.29	1.015	1.132	1.015	0.869	0.997	0.819	0.895	1.054	0.849146	0.0730612
F4IYF8	Histidine--tRNA ligase, cytoplasmic OS=Arabidopsis thaliana GN=At3g02760 PE=2 SV=1 - [SYHC_ARATH]	67.7	10.65	1	10	10	12	883	97.5	6.42	1.011	1.092	1.082	0.934	0.99	0.971	0.965	1.06167	0.908948	0.0333359
P43333	U2 small nuclear ribonucleoprotein A' OS=Arabidopsis thaliana GN=At1g09760 PE=2 SV=2 - [RU2A_ARATH]	67.56	29.32	7	7	7	9	249	28	6.05	1.018	1.009	1.082	1.013	0.926	0.951	0.963333	1.03633	0.929559	0.102483
Q9XI37	SNF1-related protein kinase regulatory subunit gamma-like PV42a OS=Arabidopsis thaliana GN=PV42A PE=2 SV=1 - [PV42A_ARATH]	67.44	15.34	1	4	4	5	352	38.6	6.35	1.147	1.084	1.109	0.903	0.915	0.939	0.919	1.11333	0.825449	0.000779637
O49313	NADH dehydrogenase [ubiquinone] 1 alpha subcomplex subunit 13-B OS=Arabidopsis thaliana GN=At2g33220 PE=2 SV=1 - [NDADB_ARATH]	67.35	42.66	4	5	5	10	143	16.1	9.36	0.974	0.978	0.942	0.993	1.018	1.078	1.02967	0.964667	1.06738	0.0786256
Q9LTV6	Peroxisomal 2,4-dienoyl-CoA reductase OS=Arabidopsis thaliana GN=At3g12800 PE=2 SV=1 - [DECR2_ARATH]	67.34	34.56	3	10	10	13	298	31.8	9.14	1.005	0.985	1.011	0.977	1.011	0.99	0.992667	1.00033	0.992336	0.577032
Q84L30	Ubiquitin receptor RAD23d OS=Arabidopsis thaliana GN=RAD23D PE=1 SV=2 - [RD23D_ARATH]	67.28	33.07	3	7	10	16	378	40	4.64	0.891	0.898	0.927	1.108	1.135	1.184	1.14233	0.905333	1.26178	0.00067223
Q9FHG2	60S ribosomal protein L32-2 OS=Arabidopsis thaliana GN=RPL32B PE=2 SV=1 - [RL322_ARATH]	67.16	24.81	1	1	4	10	133	15.5	10.78	0.908	1.093	0.947	0.979	1.205	0.936	1.04	0.982667	1.05834	0.599394
Q9C909	Glycine-rich RNA-binding protein 5, mitochondrial OS=Arabidopsis thaliana GN=RBG5 PE=2 SV=1 - [RBG5_ARATH]	67.06	5.54	1	1	1	2	289	28.7	4.77	1.02	1.05	1.044	0.963	0.999	0.953	0.971667	1.038	0.936095	0.016532
Q39243	Thioredoxin reductase 1 OS=Arabidopsis thaliana GN=NTR1 PE=1 SV=3 - [TRXB1_ARATH]	67.04	12.53	1	1	3	4	375	39.6	7.36	0.94	1.157	1.049	0.783	1.338	0.773	0.964667	1.04867	0.919898	0.691647
C0Z2U7	AT5G30510 protein OS=Arabidopsis thaliana GN=At5g30510 PE=2 SV=1 - [C0Z2U7_ARATH]	66.84	11.9	2	4	4	6	378	41.4	7.02	1.077	1.129	1.068	0.829	0.833	0.888	0.85	1.09133	0.778864	0.00085456
Q66GQ3	Protein disulfide isomerase-like 1-6 OS=Arabidopsis thaliana GN=PDIL1-6 PE=2 SV=1 - [PDI16_ARATH]	66.83	24.16	2	10	10	13	534	59.5	5.02	1.03	1.029	1.036	0.987	0.986	0.914	0.962333	1.03167	0.932795	0.0460642
Q9C658	Protein decapping 5 OS=Arabidopsis thaliana GN=DCP5 PE=1 SV=1 - [DCP5_ARATH]	66.8	9.49	1	5	5	9	611	64.3	7.71	0.857	0.751	0.85	1.258	1.222	1.217	1.23233	0.819333	1.50407	0.000350774
Q84W89	DEAD-box ATP-dependent RNA helicase 37 OS=Arabidopsis thaliana GN=RH37 PE=2 SV=2 - [RH37_ARATH]	66.63	16.9	4	4	9	13	633	67.6	7.11	1.115	1.03	0.998	0.958	0.986	1.039	0.994333	1.04767	0.949093	0.275164
Q9XI42	F9L1.21 protein OS=Arabidopsis thaliana GN=F9L1.21 PE=2 SV=1 - [Q9XI42_ARATH]	66.63	32.81	4	2	2	3	64	7	9.95	0.668	0.709	0.736	1.335	1.55	1.294	1.393	0.704333	1.97776	0.00109038
F4JRE0	Transmembrane 9 superfamily member 12 OS=Arabidopsis thaliana GN=TMN12 PE=2 SV=1 - [TMN12_ARATH]	66.62	15.95	2	6	6	9	652	74.1	6.18	1.091	0.961	1.08	0.931	0.917	1.011	0.953	1.044	0.912835	0.148259
F4HYF3	Bifunctional D-cysteine desulfhydrase/1-aminocyclopropane-1-carboxylate deaminase, mitochondrial OS=Arabidopsis thaliana GN=DCD PE=1 SV=1 - [DCYD1_ARATH]	66.46	13.22	1	4	4	4	401	43.9	7.36	0.898	0.98	1.027	0.965	0.859	1.269	1.031	0.968333	1.06472	0.651356
Q8S9K8	Methylesterase 10 OS=Arabidopsis thaliana GN=MES10 PE=2 SV=1 - [MES10_ARATH]	66.38	22.18	1	4	4	5	275	31.3	6.14	0.878	1.017	0.923	1.155	1.103	1.044	1.10067	0.939333	1.17175	0.036149
Q9M1X0	Ribosome-recycling factor, chloroplastic OS=Arabidopsis thaliana GN=RRF PE=2 SV=2 - [RRFC_ARATH]	66.37	23.27	1	7	7	11	275	30.4	9.44	0.795	0.875	0.875	1.19	1.255	1.164	1.203	0.848333	1.41807	0.000733087
Q9M158	Rhodanese-like domain-containing protein 4, chloroplastic OS=Arabidopsis thaliana GN=STR4 PE=1 SV=2 - [STR4_ARATH]	66.37	22.75	1	10	10	20	466	49.4	5.3	1.005	1.077	1.054	0.963	0.969	0.964	0.965333	1.04533	0.923469	0.0198837
Q9FYC2	Pheophorbide a oxygenase, chloroplastic OS=Arabidopsis thaliana GN=PAO PE=1 SV=1 - [PAO_ARATH]	66.26	13.04	50	6	6	8	537	60.7	7.49	1.057	1.062	1.106	0.889	0.912	0.962	0.921	1.075	0.856744	0.00441367
F4J9W8	Transducin family protein / WD-40 repeat family protein OS=Arabidopsis thaliana GN=At3g18860 PE=4 SV=1 - [F4J9W8_ARATH]	66.24	5.79	2	4	4	4	760	84.2	5.58	1.004	0.999	1.036	0.923	0.93	0.906	0.919667	1.013	0.907864	0.00236439
Q9CAT7	Nascent polypeptide-associated complex subunit beta OS=Arabidopsis thaliana GN=At1g73230 PE=2 SV=1 - [BTF3L_ARATH]	66.1	38.18	1	3	7	13	165	18	6.21	0.731	0.704	0.757	1.273	1.323	1.257	1.28433	0.730667	1.75776	2.49371e-05
O80480	Importin subunit alpha-4 OS=Arabidopsis thaliana GN=IMPA4 PE=1 SV=1 - [IMPA4_ARATH]	65.95	14.87	1	4	6	7	538	59.4	5.33	1.124	0.978	1.136	1.035	0.89	0.851	0.925333	1.07933	0.857319	0.111255
Q9SF53	60S ribosomal protein L35-1 OS=Arabidopsis thaliana GN=RPL35A PE=2 SV=1 - [RL351_ARATH]	65.91	37.4	2	3	7	13	123	14.3	10.92	1.012	0.961	1.005	1.014	1.113	0.959	1.02867	0.992667	1.03627	0.493272
Q9STG9	Amidophosphoribosyltransferase 2, chloroplastic OS=Arabidopsis thaliana GN=ASE2 PE=1 SV=1 - [ASE2_ARATH]	65.91	10.7	2	2	4	6	561	61	6.76	0.986	0.92	0.826	1.172	1.137	1.097	1.13533	0.910667	1.24671	0.0118248
Q7X659	Vacuolar protein sorting-associated protein 35A OS=Arabidopsis thaliana GN=VPS35A PE=1 SV=1 - [VP35A_ARATH]	65.87	5.72	2	3	4	6	787	89.4	5.24	1.126	1.128	1.033	0.863	0.919	0.846	0.876	1.09567	0.799513	0.00458632
O04420	Uricase OS=Arabidopsis thaliana GN=At2g26230 PE=1 SV=2 - [URIC_ARATH]	65.82	10.03	1	2	2	2	309	34.9	8.48	0.944	1.014	0.913	1.068	1.04	1.098	1.06867	0.957	1.11668	0.0310592
Q9SMN1	Gamma carbonic anhydrase-like 2, mitochondrial OS=Arabidopsis thaliana GN=GAMMACAL2 PE=1 SV=1 - [GCAL2_ARATH]	65.8	17.58	3	4	4	5	256	27.9	8.68	0.962	1	1.078	0.952	0.982	1.036	0.99	1.01333	0.976974	0.608686
Q9M8R4	Protein DJ-1 homolog D OS=Arabidopsis thaliana GN=DJ1D PE=1 SV=1 - [DJ1D_ARATH]	65.77	25	1	6	6	8	388	41.6	5.41	1.043	0.983	1.027	0.963	1.019	0.95	0.977333	1.01767	0.960367	0.219721
Q9SA67	F10O3.15 protein OS=Arabidopsis thaliana GN=F10O3.15 PE=4 SV=1 - [Q9SA67_ARATH]	65.74	24.07	2	5	5	7	270	30.3	5.43	0.994	0.995	1.032	1.069	1.053	0.967	1.02967	1.007	1.02251	0.542041
Q9M8M7	Acetylornithine aminotransferase, chloroplastic/mitochondrial OS=Arabidopsis thaliana GN=WIN1 PE=1 SV=1 - [ARGD_ARATH]	65.74	11.6	1	4	4	6	457	48.8	6.8	1.015	0.933	1.049	1.034	0.965	1	0.999667	0.999	1.00067	0.98743
Q9SUR6	Cystine lyase CORI3 OS=Arabidopsis thaliana GN=CORI3 PE=1 SV=1 - [CORI3_ARATH]	65.62	17.06	2	5	5	5	422	47	6.28	0.952	0.839	0.909	1.191	1.124	1.159	1.158	0.9	1.28667	0.00250414
Q9M336	Uracil phosphoribosyltransferase, chloroplastic OS=Arabidopsis thaliana GN=UPP PE=1 SV=1 - [UPP_ARATH]	65.54	30.07	1	9	9	11	296	32.2	8.95	0.899	0.872	0.851	1.143	1.179	1.275	1.199	0.874	1.37185	0.00147173
O24457	Pyruvate dehydrogenase E1 component subunit alpha-3, chloroplastic OS=Arabidopsis thaliana GN=PDH-E1 ALPHA PE=2 SV=1 - [ODPA3_ARATH]	65.47	13.32	1	6	6	8	428	47.1	7.49	1.029	1.047	1.041	0.994	0.851	0.934	0.926333	1.039	0.891562	0.0543341
Q9ZPR0	Ubiquinone biosynthesis protein COQ4 homolog, mitochondrial OS=Arabidopsis thaliana GN=At2g03690 PE=2 SV=1 - [COQ4_ARATH]	65.46	9.29	1	2	2	2	226	25.9	8.29	0.941	1.368	0.967	0.879	0.971	0.814	0.888	1.092	0.813187	0.233571
O22957	Apoptosis inhibitory protein 5 (API5) OS=Arabidopsis thaliana GN=At2g34040 PE=1 SV=2 - [O22957_ARATH]	65.46	10.31	2	5	5	11	553	61.6	7.99	0.98	1.091	1.045	0.927	0.939	0.96	0.942	1.03867	0.906932	0.0451973
Q8VWG7	TPR repeat-containing thioredoxin TDX OS=Arabidopsis thaliana GN=TDX PE=1 SV=1 - [TDX_ARATH]	65.33	9.47	1	3	3	3	380	42.8	5.72	1.098	1.067	0.952	1.086	0.865	0.946	0.965667	1.039	0.929419	0.402291
P25863	Dehydrin Xero 1 OS=Arabidopsis thaliana GN=XERO1 PE=2 SV=2 - [XERO1_ARATH]	65.33	21.88	1	1	2	12	128	13.4	9.2	0.684	0.717	0.716	1.441	1.471	1.292	1.40133	0.705667	1.98583	0.000248227
F4IUQ7	Beta-galactosidase OS=Arabidopsis thaliana GN=BGAL9 PE=3 SV=1 - [F4IUQ7_ARATH]	65.21	9.9	4	7	8	13	859	96.5	8.02	1.014	1.068	1.089	0.901	0.908	0.941	0.916667	1.057	0.867234	0.00532943
Q9LSU9	AT3g25550/MWL2_17 OS=Arabidopsis thaliana GN=At3g25545 PE=1 SV=1 - [Q9LSU9_ARATH]	65.1	3.75	1	1	1	1	267	29.4	5.74	1.219	0.738	0.86	1.15	1.013	1.099	1.08733	0.939	1.15797	0.37811
Q9LRM9	Ubiquinone biosynthesis monooxygenase COQ6, mitochondrial OS=Arabidopsis thaliana GN=COQ6 PE=3 SV=1 - [Q9LRM9_ARATH]	65.04	13.37	4	4	4	5	486	53.4	8.44	1.122	0.859	0.998	1.071	1.013	1.063	1.049	0.993	1.05639	0.512998
Q9M9P5	Adenine nucleotide alpha hydrolases-like protein OS=Arabidopsis thaliana GN=T17B22.4 PE=4 SV=1 - [Q9M9P5_ARATH]	64.99	16.98	2	3	3	5	159	17.4	7.37	0.772	0.793	0.824	1.344	0.955	1.33	1.20967	0.796333	1.51905	0.032223
Q1H595	Sm-like protein LSM2 OS=Arabidopsis thaliana GN=LSM2 PE=1 SV=1 - [LSM2_ARATH]	64.85	26.88	1	2	2	2	93	10.7	7.44	1.008	0.974	0.956	1.155	0.999	0.971	1.04167	0.979333	1.06365	0.352034
Q8L7U5	Serine/threonine-protein phosphatase BSL1 OS=Arabidopsis thaliana GN=BSL1 PE=1 SV=2 - [BSL1_ARATH]	64.83	6.02	1	2	3	3	881	96.1	6.35	1.008	0.968	0.938	0.857	1.247	0.962	1.022	0.971333	1.05216	0.690405
P25851	Fructose-1,6-bisphosphatase, chloroplastic OS=Arabidopsis thaliana GN=FBP PE=1 SV=2 - [F16P1_ARATH]	64.71	14.63	1	4	4	5	417	45.1	5.4	1.146	1.008	1.056	0.786	0.97	0.96	0.905333	1.07	0.846106	0.0845493
O64490	F20D22.6 protein OS=Arabidopsis thaliana GN=F20D22.6 PE=2 SV=1 - [O64490_ARATH]	64.68	24.3	9	8	8	12	465	50.8	8.76	0.998	0.914	0.984	0.99	1.003	1.082	1.025	0.965333	1.06181	0.198439
O49292	PsbP domain-containing protein 4, chloroplastic OS=Arabidopsis thaliana GN=PPD4 PE=1 SV=2 - [PPD4_ARATH]	64.65	23.46	1	6	6	9	260	28.5	7.5	0.948	0.997	0.936	1.12	1.003	1.109	1.07733	0.960333	1.12183	0.0485527
Q05431	L-ascorbate peroxidase 1, cytosolic OS=Arabidopsis thaliana GN=APX1 PE=1 SV=2 - [APX1_ARATH]	64.43	21.2	3	4	4	5	250	27.5	6.13	1.055	1.097	1.124	0.927	0.97	0.939	0.945333	1.092	0.86569	0.00352729
Q9LXZ1	Protein kinase C inhibitor-like protein OS=Arabidopsis thaliana GN=T5P19_140 PE=2 SV=1 - [Q9LXZ1_ARATH]	64.43	55.04	3	7	7	12	129	14.1	6.68	0.855	0.896	0.899	1.128	1.183	1.187	1.166	0.883333	1.32	0.000285175
P42814	Ribonuclease 2 OS=Arabidopsis thaliana GN=RNS2 PE=2 SV=1 - [RNS2_ARATH]	64.33	12.36	3	3	3	5	259	29.1	6.4	0.91	0.901	0.943	1.088	1.152	1.083	1.10767	0.918	1.20661	0.00177629
Q8VZK8	Probable thionin-2.3 OS=Arabidopsis thaliana GN=At2g15010 PE=2 SV=2 - [THN23_ARATH]	64.3	17.04	1	1	1	1	135	14.2	6.39	1.834	0.771	1.71	0.461	0.462	0.435	0.452667	1.43833	0.314716	0.042551
O23710	Proteasome subunit beta type-7-A OS=Arabidopsis thaliana GN=PBB1 PE=1 SV=2 - [PSB7A_ARATH]	64.25	17.95	7	6	6	11	273	29.5	7.12	0.938	1.066	0.97	1.056	1.021	1.02	1.03233	0.991333	1.04136	0.365864
Q95748	NADH dehydrogenase [ubiquinone] iron-sulfur protein 3 OS=Arabidopsis thaliana GN=NAD9 PE=2 SV=2 - [NDUS3_ARATH]	63.97	32.11	2	5	5	10	190	22.9	7.44	1.039	1.031	1.024	0.976	0.925	0.988	0.963	1.03133	0.933743	0.025999
Q94BR8	Aldose 1-epimerase OS=Arabidopsis thaliana GN=At3g17940 PE=2 SV=1 - [Q94BR8_ARATH]	63.94	16.1	3	5	5	7	323	35.2	6.6	0.971	1.031	1.095	0.964	1.067	0.982	1.00433	1.03233	0.972877	0.589931
Q9CA67	Geranylgeranyl diphosphate reductase, chloroplastic OS=Arabidopsis thaliana GN=CHLP PE=1 SV=1 - [CHLP_ARATH]	63.94	19.27	1	6	6	7	467	51.8	8.91	0.999	0.947	0.973	1.071	1.026	1.072	1.05633	0.973	1.08565	0.0174701
Q9FIC8	Germin-like protein subfamily 1 member 16 OS=Arabidopsis thaliana GN=At5g39130 PE=2 SV=1 - [GL116_ARATH]	63.83	11.71	1	1	2	5	222	24	6.38	1.064	0.971	1.002	1.144	0.971	0.801	0.972	1.01233	0.960158	0.714606
Q5XEP2	Hsp70-Hsp90 organizing protein 2 OS=Arabidopsis thaliana GN=HOP2 PE=1 SV=1 - [HSOP2_ARATH]	63.75	23.64	1	9	11	12	571	64.5	6.18	0.961	0.917	0.986	1.027	1.108	1.038	1.05767	0.954667	1.10789	0.0335894
Q05728	Phosphoribosylformylglycinamidine cyclo-ligase, chloroplastic OS=Arabidopsis thaliana GN=PUR5 PE=1 SV=2 - [PUR5_ARATH]	63.55	13.11	1	2	2	2	389	41.5	5.52	1.13	1.048	0.933	0.953	1.008	0.911	0.957333	1.037	0.923176	0.278993
Q8VZ56	Alpha-amylase 1 OS=Arabidopsis thaliana GN=AMY1 PE=1 SV=1 - [AMY1_ARATH]	63.54	17.02	1	7	7	10	423	47.3	5.97	0.962	0.922	0.893	1.042	1.135	1.158	1.11167	0.925667	1.20094	0.010272
Q84W68	Putative palmitoyl-protein thioesterase OS=Arabidopsis thaliana GN=At5g47330 PE=2 SV=1 - [Q84W68_ARATH]	63.53	15.92	9	4	4	4	314	34.5	7.18	0.889	0.925	0.979	1.061	1.232	1.033	1.10867	0.931	1.19083	0.0579858
O24658	Endochitinase At2g43590 OS=Arabidopsis thaliana GN=At2g43590 PE=2 SV=1 - [CHI59_ARATH]	63.27	12.5	4	2	2	3	264	28.3	8.05	0.948	1.083	1.015	1.026	1.071	1.032	1.043	1.01533	1.02725	0.54097
Q9FH13	Putative 4-hydroxy-4-methyl-2-oxoglutarate aldolase 3 OS=Arabidopsis thaliana GN=At5g56260 PE=1 SV=1 - [RRAA3_ARATH]	63.06	16.87	1	2	2	2	166	17.6	5.55	1.015	0.968	1.047	0.995	1.022	0.968	0.995	1.01	0.985149	0.617356
Q9M9M9	Probable NADH dehydrogenase [ubiquinone] 1 alpha subcomplex subunit 12 OS=Arabidopsis thaliana GN=At3g03100 PE=1 SV=1 - [NDUAC_ARATH]	62.98	42.14	4	7	7	15	159	18.3	9.23	0.721	0.742	0.711	1.288	1.423	1.326	1.34567	0.724667	1.85695	0.000113101
Q940S5	Coatomer subunit zeta-1 OS=Arabidopsis thaliana GN=At1g60970 PE=2 SV=1 - [COPZ1_ARATH]	62.86	38.98	3	4	4	5	177	19.6	4.68	0.993	1.042	1.045	1.045	1.026	0.985	1.01867	1.02667	0.992208	0.759878
O65655	Putative uncharacterized protein AT4g39680 OS=Arabidopsis thaliana GN=At4g39680 PE=1 SV=1 - [O65655_ARATH]	62.78	15.48	1	8	8	9	633	69.4	4.97	0.904	0.921	0.944	1.116	1.157	1.14	1.13767	0.923	1.23257	0.000206576
Q9SCY2	Peptidyl-prolyl cis-trans isomerase FKBP13, chloroplastic OS=Arabidopsis thaliana GN=FKBP13 PE=1 SV=2 - [FKB13_ARATH]	62.7	26.92	1	5	5	10	208	22	8.69	0.888	0.817	0.824	1.229	1.234	1.21	1.22433	0.843	1.45235	8.79034e-05
Q9M0D5	AT4g29480/F17A13_300 OS=Arabidopsis thaliana GN=At4g29480 PE=2 SV=1 - [Q9M0D5_ARATH]	62.68	31.97	2	2	5	6	122	13.9	8.85	1.061	1.004	1.164	0.982	0.936	0.841	0.919667	1.07633	0.854444	0.0665041
Q9FJX3	Mitochondrial outer membrane protein porin 2 OS=Arabidopsis thaliana GN=VDAC2 PE=1 SV=1 - [VDAC2_ARATH]	62.6	38.77	3	9	9	16	276	29.6	8.85	1.095	1.128	1.078	0.923	0.903	0.868	0.898	1.10033	0.816116	0.000745153
Q9M7Q7	Proliferating cellular nuclear antigen 1 OS=Arabidopsis thaliana GN=PCNA PE=1 SV=2 - [PCNA1_ARATH]	62.58	25.86	1	1	7	9	263	29.1	4.75	1.162	1.067	1.002	0.873	0.929	0.956	0.919333	1.077	0.853606	0.0398071
O81884	L-galactose dehydrogenase OS=Arabidopsis thaliana GN=LGALDH PE=1 SV=1 - [GALDH_ARATH]	62.58	18.81	1	6	6	7	319	34.5	5.71	0.988	1.03	0.974	1.028	0.983	1.033	1.01467	0.997333	1.01738	0.495627
Q8GUQ8	Xanthine dehydrogenase 1 OS=Arabidopsis thaliana GN=XDH1 PE=1 SV=1 - [XDH1_ARATH]	62.51	7.86	3	11	11	17	1361	149.1	6.65	0.875	0.923	0.893	1.149	1.181	1.142	1.15733	0.897	1.29023	0.000146178
Q9FKC0	60S ribosomal protein L13a-4 OS=Arabidopsis thaliana GN=RPL13AD PE=2 SV=1 - [R13A4_ARATH]	62.34	45.15	2	3	10	18	206	23.6	10.37	1.013	1.041	0.965	1.009	1.066	0.937	1.004	1.00633	0.997681	0.959722
Q9MBH2	AIG2 protein-like OS=Arabidopsis thaliana GN=At3g28940 PE=2 SV=1 - [Q9MBH2_ARATH]	62.33	23.67	1	3	3	6	169	19.5	5.07	1.035	0.958	1.052	1.025	0.944	0.985	0.984667	1.015	0.970115	0.460495
O04350	Tubulin-folding cofactor A OS=Arabidopsis thaliana GN=TFCA PE=1 SV=2 - [TBCA_ARATH]	62.3	32.74	1	5	5	7	113	12.8	5.05	1.058	1.003	0.99	0.968	1.062	0.97	1	1.017	0.983284	0.672678
Q9SJD4	Long chain acyl-CoA synthetase 8 OS=Arabidopsis thaliana GN=LACS8 PE=1 SV=1 - [LACS8_ARATH]	62.29	4.31	1	2	2	2	720	78.3	7.61	1.162	0.88	1.003	0.936	1.05	0.987	0.991	1.015	0.976355	0.798639
Q8LEY2	Putative uncharacterized protein OS=Arabidopsis thaliana PE=2 SV=1 - [Q8LEY2_ARATH]	62.17	9.83	3	4	4	6	468	53.6	5.95	0.977	1.069	0.984	0.959	1.038	0.947	0.981333	1.01	0.971617	0.523903
Q9LU85	Probable plastid-lipid-associated protein 4, chloroplastic OS=Arabidopsis thaliana GN=PAP4 PE=2 SV=1 - [PAP4_ARATH]	62.16	39.67	2	9	9	13	242	27.1	9.7	0.995	1	0.996	1.04	0.998	1.013	1.017	0.997	1.02006	0.181582
Q9ZW27	Glutathione S-transferase U4 OS=Arabidopsis thaliana GN=GSTU4 PE=1 SV=1 - [GSTU4_ARATH]	62.1	22.77	1	5	5	5	224	25.8	5.57	0.994	1.104	0.941	0.97	0.972	1.049	0.997	1.013	0.984205	0.784048
O22718	ATP-citrate synthase alpha chain protein 2 OS=Arabidopsis thaliana GN=ACLA-2 PE=2 SV=1 - [ACLA2_ARATH]	61.88	17.97	1	1	6	12	423	46.7	5.27	1.022	0.884	0.902	1.13	1.098	1.069	1.099	0.936	1.17415	0.0252138
P57742	Probable prefoldin subunit 5 OS=Arabidopsis thaliana GN=At5g23290 PE=2 SV=1 - [PFD5_ARATH]	61.71	34.44	2	4	4	5	151	16.4	5.71	0.845	0.803	0.803	1.32	1.46	1.16	1.31333	0.817	1.60751	0.00482263
Q9LII2	Oleosin family protein OS=Arabidopsis thaliana GN=At3g18570 PE=2 SV=1 - [Q9LII2_ARATH]	61.69	19.28	1	3	3	17	166	18.1	9.35	1.032	1.095	0.999	0.929	0.991	0.967	0.962333	1.042	0.923544	0.0758409
Q2HIM5	Membrane magnesium transporter OS=Arabidopsis thaliana GN=At5g03345 PE=2 SV=1 - [MMGT_ARATH]	61.57	15.38	1	1	1	1	104	11.8	6.27	1.115	0.936	1.08	0.96	0.912	1.013	0.961667	1.04367	0.921431	0.256883
P25873	50S ribosomal protein L15, chloroplastic OS=Arabidopsis thaliana GN=RPL15 PE=1 SV=2 - [RK15_ARATH]	61.54	21.66	2	5	5	7	277	29.7	10.77	0.992	0.976	1.032	1.016	1.068	1.02	1.03467	1	1.03467	0.215607
Q9SU83	Alkaline-phosphatase-like protein OS=Arabidopsis thaliana GN=T16L4.190 PE=2 SV=1 - [Q9SU83_ARATH]	61.42	18.95	5	10	10	17	496	54.6	5.88	0.929	0.933	0.909	1.055	1.186	1.004	1.08167	0.923667	1.17106	0.0446554
Q9MAT0	26S proteasome non-ATPase regulatory subunit 1 homolog B OS=Arabidopsis thaliana GN=RPN2B PE=1 SV=1 - [PSD1B_ARATH]	61.28	6.49	1	2	6	8	1001	108.8	5.35	1.038	0.982	1.016	0.947	0.947	1.1	0.998	1.012	0.986166	0.806623
O82209	Copia-like retroelement pol polyprotein OS=Arabidopsis thaliana GN=At2g19680 PE=2 SV=1 - [O82209_ARATH]	61.21	23.77	2	1	4	5	122	13.8	9.04	1.142	1.117	1.009	0.857	0.872	0.986	0.905	1.08933	0.830783	0.0329947
Q9LNV0	Calcium-dependent lipid-binding domain protein OS=Arabidopsis thaliana GN=At1g07310 PE=1 SV=1 - [Q9LNV0_ARATH]	61.2	7.67	1	2	2	4	352	39	7.66	0.811	0.666	0.769	1.425	1.383	1.314	1.374	0.748667	1.83526	0.000314806
Q38842	AT0ZI1 protein OS=Arabidopsis thaliana GN=ATOZI1 PE=2 SV=1 - [Q38842_ARATH]	61.2	32.5	1	2	2	3	80	8.6	8.87	0.907	0.95	1.02	1.079	1.108	1.101	1.096	0.959	1.14286	0.0158473
Q8LF70	EDGP OS=Arabidopsis thaliana PE=2 SV=1 - [Q8LF70_ARATH]	61.15	16.86	2	5	6	8	433	45.8	8.66	1.038	0.984	0.992	1.022	0.965	1.007	0.998	1.00467	0.993364	0.794623
Q8GX27	At3g19920 OS=Arabidopsis thaliana GN=At3g19920/MPN9_16 PE=2 SV=1 - [Q8GX27_ARATH]	61.06	25.72	2	9	9	12	416	45.2	8.07	1.038	1.075	1.082	0.96	0.919	0.956	0.945	1.065	0.887324	0.00314368
F4J7Z8	Uncharacterized protein OS=Arabidopsis thaliana GN=At3g46220 PE=1 SV=1 - [F4J7Z8_ARATH]	61.06	5.84	3	3	3	4	788	87.3	5.47	1.006	1.011	0.888	1.023	1.008	0.913	0.981333	0.968333	1.01343	0.818072
Q9SGZ5	Probable beta-D-xylosidase 7 OS=Arabidopsis thaliana GN=BXL7 PE=2 SV=2 - [BXL7_ARATH]	61.04	5.08	1	3	3	4	767	83.8	8.03	1.124	1.12	1.182	0.823	0.832	0.84	0.831667	1.142	0.728255	0.000113721
P94111	Protein STRICTOSIDINE SYNTHASE-LIKE 12 OS=Arabidopsis thaliana GN=SSL12 PE=2 SV=2 - [SSL12_ARATH]	60.74	18.81	2	4	4	8	335	35.3	5.81	0.914	0.965	0.947	1.129	1.105	1.046	1.09333	0.942	1.16065	0.00630001
Q9M0Y8	Vesicle-fusing ATPase OS=Arabidopsis thaliana GN=NSF PE=2 SV=2 - [NSF_ARATH]	60.73	12.13	1	8	8	11	742	81.4	6.1	0.989	1.031	1.011	0.966	0.98	0.927	0.957667	1.01033	0.947872	0.0576949
O04485	AT1G09620 protein OS=Arabidopsis thaliana GN=F21M12.1 PE=2 SV=1 - [O04485_ARATH]	60.64	22.79	3	18	18	25	1084	122.8	6.09	0.952	0.996	1.026	1.018	0.995	0.995	1.00267	0.991333	1.01143	0.645437
Q8H1Y0	Pyruvate dehydrogenase E1 component subunit alpha-2, mitochondrial OS=Arabidopsis thaliana GN=IAR4 PE=1 SV=2 - [ODPA2_ARATH]	60.55	16.28	2	4	6	9	393	43.3	7.91	1.036	1.077	1.006	0.945	0.944	0.943	0.944	1.03967	0.907983	0.00968169
O04616	Protein CURVATURE THYLAKOID 1A, chloroplastic OS=Arabidopsis thaliana GN=CURT1A PE=1 SV=1 - [CUT1A_ARATH]	60.54	6.1	1	1	1	3	164	17.7	9.17	0.948	1.199	0.96	0.903	0.974	0.963	0.946667	1.03567	0.914065	0.352479
Q0WSC4	Putative signal recognition particle receptor beta subunit OS=Arabidopsis thaliana GN=At2g18770 PE=2 SV=1 - [Q0WSC4_ARATH]	60.46	14.62	3	2	2	3	260	29	7.93	1.084	1.002	0.955	0.887	1.042	0.924	0.951	1.01367	0.938178	0.355545
Q9FJW4	NADH dehydrogenase [ubiquinone] iron-sulfur protein 4, mitochondrial OS=Arabidopsis thaliana GN=FRO1 PE=2 SV=1 - [NDUS4_ARATH]	60.42	34.42	1	4	4	5	154	17.1	9.64	0.666	0.711	0.646	1.379	1.666	1.292	1.44567	0.674333	2.14385	0.00253979
O81062	Signal peptide peptidase OS=Arabidopsis thaliana GN=SPP PE=2 SV=1 - [SIP_ARATH]	60.41	6.4	1	2	2	3	344	38.3	8.22	1.003	1.19	0.956	0.908	0.991	1.069	0.989333	1.04967	0.942521	0.518193
Q8L7W8	Alpha-L-fucosidase 2 OS=Arabidopsis thaliana GN=FUC95A PE=1 SV=1 - [FUCO2_ARATH]	60.31	15.42	1	11	11	18	843	93.7	7.24	1.045	1.053	1.028	0.962	1.009	0.949	0.973333	1.042	0.934101	0.0250539
Q9LJH5	Peroxisomal (S)-2-hydroxy-acid oxidase GLO4 OS=Arabidopsis thaliana GN=GLO4 PE=2 SV=1 - [GLO4_ARATH]	60.23	9.64	2	2	2	2	363	39.9	8.12	1.134	1.004	0.96	0.953	0.951	0.998	0.967333	1.03267	0.936733	0.29633
Q9LUL3	Uncharacterized protein OS=Arabidopsis thaliana PE=4 SV=1 - [Q9LUL3_ARATH]	60.23	11.24	4	6	6	8	507	58.3	5.58	1.01	1.135	1.076	0.908	0.891	1.002	0.933667	1.07367	0.869606	0.0486692
O22607	WD-40 repeat-containing protein MSI4 OS=Arabidopsis thaliana GN=MSI4 PE=1 SV=3 - [MSI4_ARATH]	60.22	18.54	2	6	6	8	507	55.7	6.23	1.075	1.042	1.105	0.903	0.941	0.935	0.926333	1.074	0.862508	0.00242909
Q9SYG1	17.4 kDa class III heat shock protein OS=Arabidopsis thaliana GN=HSP17.4B PE=2 SV=1 - [HS174_ARATH]	60.2	29.68	1	4	4	6	155	17.4	8.29	1.033	1.023	1.092	0.959	0.941	0.863	0.921	1.04933	0.8777	0.0245154
Q0WTU8	Putative uncharacterized protein At1g20760 OS=Arabidopsis thaliana GN=At1g20760 PE=2 SV=1 - [Q0WTU8_ARATH]	60.07	4.55	5	3	3	3	572	60.4	7.61	1.112	1.008	1.039	1.021	0.823	1.078	0.974	1.053	0.924976	0.396096
P25853	Beta-amylase 5 OS=Arabidopsis thaliana GN=BAM5 PE=2 SV=1 - [BAM5_ARATH]	60.05	17.07	1	5	5	7	498	56	5.36	0.809	0.964	0.934	1.022	1.203	1.123	1.116	0.902333	1.23679	0.039041
O23264	Selenium-binding protein 1 OS=Arabidopsis thaliana GN=SBP1 PE=1 SV=1 - [SEBP1_ARATH]	60.04	16.73	2	2	7	10	490	54	5.67	1.069	0.972	1.011	1.199	0.854	0.915	0.989333	1.01733	0.972477	0.811581
Q9SYM5	Trifunctional UDP-glucose 4,6-dehydratase/UDP-4-keto-6-deoxy-D-glucose 3,5-epimerase/UDP-4-keto-L-rhamnose-reductase RHM1 OS=Arabidopsis thaliana GN=RHM1 PE=1 SV=1 - [RHM1_ARATH]	60.03	10.91	4	6	7	7	669	75.3	7.28	1.022	0.992	0.997	1.014	0.988	1.035	1.01233	1.00367	1.00864	0.62634
Q9FMF7	Dicarboxylate transporter 2.1, chloroplastic OS=Arabidopsis thaliana GN=DIT2-1 PE=1 SV=1 - [DIT21_ARATH]	60	3.91	1	2	2	4	563	60	9.25	0.993	1.083	1.047	0.89	1.094	0.927	0.970333	1.041	0.932117	0.357274
Q8HS55	Photosystem II CP47 reaction center protein (Fragment) OS=Arabidopsis thaliana GN=psbB PE=3 SV=1 - [Q8HS55_ARATH]	59.98	10.4	2	3	3	5	471	52	6.61	1.034	1.087	1.119	0.956	0.854	0.973	0.927667	1.08	0.858951	0.0270163
Q9LKB2	Peptide-N4-(N-acetyl-beta-glucosaminyl)asparagine amidase A protein OS=Arabidopsis thaliana GN=At3g14920 PE=4 SV=1 - [Q9LKB2_ARATH]	59.96	5.09	1	2	3	5	609	69	6.8	1.018	0.966	1.033	1.02	1.075	1.048	1.04767	1.00567	1.04176	0.17851
Q9M9A1	F27J15.22 OS=Arabidopsis thaliana GN=At1g48990 PE=2 SV=1 - [Q9M9A1_ARATH]	59.74	25.44	1	4	4	12	169	18.4	9.89	0.958	1.102	0.994	1.013	1.061	0.861	0.978333	1.018	0.961035	0.621269
Q9SIR5	Expressed protein OS=Arabidopsis thaliana GN=At2g25280 PE=2 SV=1 - [Q9SIR5_ARATH]	59.71	21.99	2	4	4	7	291	32.6	6.84	1.07	0.964	1.005	0.911	0.983	1.035	0.976333	1.013	0.963804	0.482186
O81746	Putative polygalacturonase OS=Arabidopsis thaliana GN=F16G20.200 PE=2 SV=1 - [O81746_ARATH]	59.49	8.89	1	3	3	3	495	54.7	5.88	0.9	0.997	0.952	1.039	1.171	1.008	1.07267	0.949667	1.12952	0.098342
Q0WNW0	Glycosyl hydrolase family protein OS=Arabidopsis thaliana GN=At5g04885 PE=2 SV=1 - [Q0WNW0_ARATH]	59.48	20	16	12	14	24	665	72.3	6.58	0.998	1.08	1.088	0.934	0.965	0.957	0.952	1.05533	0.902085	0.0268047
Q9C969	At1g80360 OS=Arabidopsis thaliana GN=F5I6.11 PE=1 SV=1 - [Q9C969_ARATH]	59.37	5.33	1	1	1	1	394	43.7	6.37	0.998	0.943	1.018	1.064	0.803	1.234	1.03367	0.986333	1.04799	0.728942
Q9LIL4	Transmembrane emp24 domain-containing protein p24beta3 OS=Arabidopsis thaliana GN=At3g22845 PE=2 SV=1 - [P24B3_ARATH]	59.37	5.14	1	1	1	3	214	24.3	6.86	1.075	1.216	0.827	0.967	1.021	0.894	0.960667	1.03933	0.92431	0.546334
Q8LB97	3-isopropylmalate dehydrogenase OS=Arabidopsis thaliana PE=2 SV=1 - [Q8LB97_ARATH]	59.36	34.9	6	7	10	20	404	43.9	5.82	1.018	0.963	0.947	1.012	1.085	1.086	1.061	0.976	1.08709	0.0595778
Q9LXU4	Putative uncharacterized protein At5g12950/T24H18_120 OS=Arabidopsis thaliana GN=T24H18_120 PE=2 SV=1 - [Q9LXU4_ARATH]	59.25	11.5	1	9	9	12	861	96.2	7.14	1.009	1.03	1.02	1.016	1.013	1.002	1.01033	1.01967	0.990847	0.276241
A0A068LMZ4	DM3Hh0 OS=Arabidopsis thaliana PE=4 SV=1 - [A0A068LMZ4_ARATH]	59.23	12.82	2	5	5	5	515	57.5	7.31	0.947	1.159	0.934	1.036	0.876	0.938	0.95	1.01333	0.9375	0.504807
Q9SRQ6	Non-specific phospholipase C3 OS=Arabidopsis thaliana GN=NPC3 PE=2 SV=1 - [NPC3_ARATH]	59.2	5.93	2	2	3	3	523	59.1	5.44	0.826	0.888	0.86	1.26	1.165	1.15	1.19167	0.858	1.38889	0.00100731
Q94JT5	AT4g35220/F23E12_220 OS=Arabidopsis thaliana GN=At4g35220 PE=2 SV=1 - [Q94JT5_ARATH]	59.13	13.24	2	2	3	4	272	30	6.02	0.908	0.978	1.102	0.994	1.049	1.021	1.02133	0.996	1.02544	0.689286
P42760	Glutathione S-transferase F6 OS=Arabidopsis thaliana GN=GSTF6 PE=2 SV=2 - [GSTF6_ARATH]	58.97	10.1	1	1	3	6	208	23.5	6.23	0.971	1.013	1.017	1.01	1.073	0.957	1.01333	1.00033	1.013	0.740476
Q93ZE7	AT3g52500/F22O6_120 OS=Arabidopsis thaliana PE=2 SV=1 - [Q93ZE7_ARATH]	58.92	13.22	3	6	6	9	469	50.9	8.18	1.13	1.045	1.109	0.886	0.913	0.866	0.888333	1.09467	0.81151	0.00205249
Q6NQ66	L-gulonolactone oxidase 2 OS=Arabidopsis thaliana GN=GULLO2 PE=1 SV=1 - [GGLO2_ARATH]	58.9	16.58	4	8	8	9	591	64.9	8.1	0.917	0.923	0.956	1.086	1.114	1.096	1.09867	0.932	1.17883	0.000338876
Q9C826	Xanthoxin dehydrogenase OS=Arabidopsis thaliana GN=ABA2 PE=1 SV=1 - [ABA2_ARATH]	58.89	15.44	1	3	3	3	285	30.3	6.28	0.968	1.042	1.011	0.97	0.876	1.112	0.986	1.007	0.979146	0.784674
P51412	50S ribosomal protein L21, chloroplastic OS=Arabidopsis thaliana GN=RPL21 PE=2 SV=1 - [RK21_ARATH]	58.83	16.82	1	2	2	2	220	24	9.25	1.006	1.018	0.98	0.959	1.012	1.034	1.00167	1.00133	1.00033	0.98997
F4IZ56	Uncharacterized protein OS=Arabidopsis thaliana GN=At3g43540 PE=4 SV=1 - [F4IZ56_ARATH]	58.78	12.29	2	2	2	4	301	33.3	5.15	1.016	0.768	0.947	0.9	1.05	1.122	1.024	0.910333	1.12486	0.313529
Q0WT03	Putative chitinase OS=Arabidopsis thaliana GN=At4g19810 PE=2 SV=1 - [Q0WT03_ARATH]	58.74	6.53	2	2	2	2	337	36.4	9.36	0.972	1.088	1.035	0.953	1.101	0.861	0.971667	1.03167	0.941842	0.4822
Q93ZC2	AT5g36230/T30G6_9 OS=Arabidopsis thaliana GN=At5g36230 PE=2 SV=1 - [Q93ZC2_ARATH]	58.65	6.81	2	2	2	2	411	47.2	5.63	0.989	1	0.984	0.968	0.915	1.177	1.02	0.991	1.02926	0.735685
Q9M0V3	DNA damage-binding protein 1a OS=Arabidopsis thaliana GN=DDB1A PE=1 SV=1 - [DDB1A_ARATH]	58.62	7.63	3	8	8	10	1088	121.2	5.29	0.958	1.009	0.931	0.954	1.06	1.021	1.01167	0.966	1.04727	0.301044
O23676	Protein mago nashi homolog OS=Arabidopsis thaliana GN=At1g02140 PE=1 SV=1 - [MGN_ARATH]	58.56	14	1	2	2	2	150	17.4	5.6	0.952	1.096	1.081	1.001	1.004	0.913	0.972667	1.043	0.932566	0.267063
Q9SCL7	Acetylglutamate kinase, chloroplastic OS=Arabidopsis thaliana GN=NAGK PE=1 SV=1 - [NAGK_ARATH]	58.54	19.31	1	5	5	7	347	36.6	8.92	1.065	1.054	1.105	0.949	0.919	0.988	0.952	1.07467	0.885856	0.00832617
O65271	Bifunctional protein FolD 4, chloroplastic OS=Arabidopsis thaliana GN=FOLD4 PE=1 SV=1 - [FOLD4_ARATH]	58.51	13.06	2	4	4	4	360	38.7	8.28	1.132	0.978	0.992	0.841	1.045	0.935	0.940333	1.034	0.909413	0.2894
P54970	IAA-amino acid hydrolase ILR1-like 2 OS=Arabidopsis thaliana GN=ILL2 PE=1 SV=2 - [ILL2_ARATH]	58.51	6.38	1	2	2	2	439	47.8	6.89	1.131	1.069	1.078	0.827	0.998	0.79	0.871667	1.09267	0.797743	0.0298641
O65449	At4g22010 OS=Arabidopsis thaliana GN=sks4 PE=2 SV=1 - [O65449_ARATH]	58.41	11.65	1	5	6	7	541	60.4	9.89	1.07	1.096	1.07	0.941	0.943	0.878	0.920667	1.07867	0.853523	0.00236498
Q9LIF6	Putative uncharacterized protein At3g21400 OS=Arabidopsis thaliana GN=At3g21400 PE=2 SV=1 - [Q9LIF6_ARATH]	58.4	20.74	1	3	3	3	188	21.1	9.39	0.944	0.828	0.886	1.146	1.138	1.042	1.10867	0.886	1.25132	0.00926005
C0Z2J1	AT1G11360 protein OS=Arabidopsis thaliana GN=At1g11360 PE=1 SV=1 - [C0Z2J1_ARATH]	58.36	14.46	5	2	3	5	242	26.5	5.08	1.051	1.007	1.012	1.053	1.006	0.959	1.006	1.02333	0.983062	0.600123
Q9LR75	Coproporphyrinogen-III oxidase 1, chloroplastic OS=Arabidopsis thaliana GN=CPX1 PE=2 SV=1 - [HEM61_ARATH]	58.31	16.58	2	5	5	8	386	43.8	6.7	1.069	0.984	1.096	0.969	0.721	0.93	0.873333	1.04967	0.83201	0.103936
Q9LXC9	Soluble inorganic pyrophosphatase 6, chloroplastic OS=Arabidopsis thaliana GN=PPA6 PE=1 SV=1 - [IPYR6_ARATH]	58.26	26.67	1	7	7	10	300	33.4	6.01	0.963	0.939	1.007	1.062	1.091	1.036	1.063	0.969667	1.09625	0.0214991
Q84J37	Laccase-15 OS=Arabidopsis thaliana GN=TT10 PE=1 SV=1 - [LAC15_ARATH]	58.11	8.5	1	4	4	4	565	64	7.47	0.943	0.934	0.897	1.127	1.166	1.037	1.11	0.924667	1.20043	0.0103956
O22886	Uroporphyrinogen decarboxylase 2, chloroplastic OS=Arabidopsis thaliana GN=HEME2 PE=2 SV=1 - [DCUP2_ARATH]	58.07	9.39	2	3	3	3	394	43.6	8.21	0.914	1.004	1.005	1.114	0.989	1.006	1.03633	0.974333	1.06363	0.277937
Q9M2E2	(+)-neomenthol dehydrogenase OS=Arabidopsis thaliana GN=SDR1 PE=1 SV=1 - [SDR1_ARATH]	58.05	21.62	3	4	5	6	296	32.8	5.47	1.021	1.024	1.015	1.034	0.923	0.992	0.983	1.02	0.963725	0.318034
Q9FGS0	RNA-binding protein CP31B, chloroplastic OS=Arabidopsis thaliana GN=CP31B PE=1 SV=1 - [CP31B_ARATH]	58.02	7.27	1	2	2	3	289	31.8	4.96	1.012	1.097	1.101	0.977	0.816	0.907	0.9	1.07	0.841121	0.0363548
Q9C8L2	Fatty-acid-binding protein 3, chloroplastic OS=Arabidopsis thaliana GN=FAP3 PE=1 SV=1 - [FAP3_ARATH]	57.98	19.51	1	4	4	5	287	30.7	8.41	1.093	1.069	1.08	0.982	0.886	0.896	0.921333	1.08067	0.85256	0.006989
Q8H151	Malonate--CoA ligase OS=Arabidopsis thaliana GN=AAE13 PE=1 SV=1 - [AAE13_ARATH]	57.97	8.82	2	5	5	7	544	60	6.06	1.055	1.048	1.072	0.96	0.965	0.942	0.955667	1.05833	0.902992	0.000503154
Q8H7F6	Bifunctional monothiol glutaredoxin-S16, chloroplastic OS=Arabidopsis thaliana GN=GRXS16 PE=1 SV=2 - [GRS16_ARATH]	57.97	7.51	1	2	2	4	293	32.2	7.9	1.108	1.069	1.11	0.919	0.957	0.793	0.889667	1.09567	0.811987	0.0159514
B3LFA4	Cysteine--tRNA ligase 2, cytoplasmic OS=Arabidopsis thaliana GN=At5g38830 PE=2 SV=1 - [SYCC2_ARATH]	57.88	10.37	1	5	5	7	511	57.8	6.33	0.941	0.964	1.007	1.047	1.027	1.009	1.02767	0.970667	1.05872	0.0624322
Q9FJM8	Putative uncharacterized protein OS=Arabidopsis thaliana PE=4 SV=1 - [Q9FJM8_ARATH]	57.88	41.94	3	3	3	3	93	10.7	4.68	1.14	1.098	1.005	0.936	0.882	0.852	0.89	1.081	0.823312	0.0151385
Q9S7W4	AT3g07720/F17A17_6 OS=Arabidopsis thaliana GN=F17A17.6 PE=2 SV=1 - [Q9S7W4_ARATH]	57.82	10.94	1	3	3	5	329	35.7	5.22	1.028	0.998	1.051	0.981	0.931	0.94	0.950667	1.02567	0.926877	0.0260225
O23006	LysM domain-containing GPI-anchored protein 2 OS=Arabidopsis thaliana GN=LYM2 PE=1 SV=1 - [LYM2_ARATH]	57.8	4.57	1	2	2	5	350	37.7	6.32	1.078	1.07	1.137	0.923	0.938	0.868	0.909667	1.095	0.830746	0.00348126
Q9ZNT1	NADH--cytochrome b5 reductase 1 OS=Arabidopsis thaliana GN=CBR1 PE=1 SV=1 - [NB5R1_ARATH]	57.75	30.96	1	8	8	13	281	31.5	8.38	1.051	1.133	1.061	0.865	0.916	0.93	0.903667	1.08167	0.835439	0.00541854
O23722	Diphosphomevalonate decarboxylase MVD1 OS=Arabidopsis thaliana GN=MVD1 PE=1 SV=1 - [MVD1_ARATH]	57.64	23.79	1	6	9	12	412	45.6	6.8	0.918	1.042	1.027	1.001	0.977	1.012	0.996667	0.995667	1.001	0.981446
Q9M338	Aldo-keto reductase family 4 member C11 OS=Arabidopsis thaliana GN=AKR4C11 PE=1 SV=1 - [AKRCB_ARATH]	57.64	7.62	1	1	2	3	315	35	6.95	0.873	0.945	1.049	1.062	1.188	0.992	1.08067	0.955667	1.1308	0.178938
Q9XEE2	Annexin D2 OS=Arabidopsis thaliana GN=ANN2 PE=1 SV=1 - [ANXD2_ARATH]	57.55	24.61	10	5	6	7	317	36.2	6.1	1.006	0.942	0.944	1.048	0.994	0.999	1.01367	0.964	1.05152	0.141536
Q9LZK7	Putative uncharacterized protein F26K9_10 (Fragment) OS=Arabidopsis thaliana GN=F26K9_10 PE=4 SV=1 - [Q9LZK7_ARATH]	57.54	7.69	3	1	1	3	156	17.5	9.89	0.972	0.945	0.914	1.146	1.008	1.137	1.097	0.943667	1.16249	0.032285
O80467	Spermidine sinapoyl-CoA acyltransferase OS=Arabidopsis thaliana GN=SDT PE=1 SV=1 - [SDT_ARATH]	57.54	6.65	1	2	2	2	451	50.3	5.1	1.157	1.089	1.058	0.962	0.871	0.847	0.893333	1.10133	0.811138	0.0103467
F4JGF4	Ferredoxin--NADP reductase OS=Arabidopsis thaliana GN=RFNR1 PE=3 SV=1 - [F4JGF4_ARATH]	57.49	19.71	2	5	7	8	350	39.3	8.22	0.807	0.898	0.829	1.206	1.26	1.196	1.22067	0.844667	1.44515	0.000374168
Q9SW21	Acyl carrier protein 4, chloroplastic OS=Arabidopsis thaliana GN=ACP4 PE=2 SV=1 - [ACP4_ARATH]	57.36	11.68	2	1	1	2	137	14.5	4.82	0.911	0.89	0.997	1.184	0.806	1.2	1.06333	0.932667	1.1401	0.381
Q945K7	Isocitrate dehydrogenase [NAD] catalytic subunit 5, mitochondrial OS=Arabidopsis thaliana GN=IDH5 PE=2 SV=1 - [IDH5_ARATH]	57.29	8.82	2	3	3	3	374	40.6	6.79	0.989	0.963	0.989	1.004	1.039	1.027	1.02333	0.980333	1.04386	0.0328978
Q9XFT3	Oxygen-evolving enhancer protein 3-1, chloroplastic OS=Arabidopsis thaliana GN=PSBQ1 PE=1 SV=3 - [PSBQ1_ARATH]	57.25	29.91	1	6	7	19	224	23.9	9.64	0.827	0.866	0.832	1.21	1.179	1.146	1.17833	0.841667	1.4	0.000109659
Q9C5U8	Histidinol dehydrogenase, chloroplastic OS=Arabidopsis thaliana GN=HISN8 PE=2 SV=1 - [HIS8_ARATH]	57.2	17.17	1	5	5	5	466	50.3	6.16	1.101	0.887	0.868	0.885	0.943	0.979	0.935667	0.952	0.982843	0.847369
Q9XI56	F9L1.7 protein OS=Arabidopsis thaliana GN=F9L1.7 PE=4 SV=1 - [Q9XI56_ARATH]	57.17	11.52	2	1	8	10	816	91.8	6.52	1.031	0.843	0.932	1.17	0.982	1.143	1.09833	0.935333	1.17427	0.111103
O49457	DNAJ heat shock protein OS=Arabidopsis thaliana GN=F20O9.160 PE=2 SV=1 - [O49457_ARATH]	57.17	18.1	4	1	5	8	348	38.2	8.91	0.825	0.838	0.932	1.085	1.284	1.195	1.188	0.865	1.37341	0.00838365
Q9SIL3	At2g20560/T13C7.15 OS=Arabidopsis thaliana GN=At2g20560 PE=2 SV=1 - [Q9SIL3_ARATH]	57.17	24.33	3	4	7	11	337	37.1	8.79	0.844	0.813	0.883	1.221	1.319	1.116	1.21867	0.846667	1.43937	0.00388542
Q42449	Profilin-1 OS=Arabidopsis thaliana GN=PRO1 PE=1 SV=1 - [PROF1_ARATH]	57.07	41.98	1	4	5	12	131	14.3	4.82	0.9	0.941	0.879	1.074	1.197	0.983	1.08467	0.906667	1.19632	0.0511423
Q9FHL8	Disease resistance protein-like OS=Arabidopsis thaliana GN=At5g23400 PE=2 SV=1 - [Q9FHL8_ARATH]	57.06	8.15	1	4	4	4	589	64	9.6	1.018	1.09	0.966	0.927	1.064	0.959	0.983333	1.02467	0.959662	0.492768
Q9M8X3	Germin-like protein subfamily 1 member 3 OS=Arabidopsis thaliana GN=At3g04170 PE=2 SV=1 - [GL13_ARATH]	57.05	24.23	1	4	4	6	227	24.4	8.13	0.815	0.843	0.817	1.141	1.34	1.178	1.21967	0.825	1.47838	0.00307985
F4J4T3	Tryptophanyl-tRNA synthetase-like protein OS=Arabidopsis thaliana GN=At3g04600 PE=3 SV=1 - [F4J4T3_ARATH]	57.05	16.17	2	6	6	6	402	45.7	6.24	1.034	0.982	0.941	0.959	0.959	1.04	0.986	0.985667	1.00034	0.993442
Q8LAD2	Succinyl-CoA ligase [ADP-forming] subunit alpha-2, mitochondrial OS=Arabidopsis thaliana GN=At5g23250 PE=2 SV=2 - [SUCA2_ARATH]	56.88	17.89	2	1	5	10	341	35.3	8.57	1.129	1.085	1.241	1.1	0.529	0.857	0.828667	1.15167	0.719537	0.133326
Q93YR3	FAM10 family protein At4g22670 OS=Arabidopsis thaliana GN=At4g22670 PE=1 SV=1 - [F10AL_ARATH]	56.88	15.19	2	7	7	8	441	46.6	4.93	1.107	1.034	1.126	0.938	0.93	0.888	0.918667	1.089	0.843587	0.00602295
Q9SVR1	At4g13160 OS=Arabidopsis thaliana GN=F17N18.50 PE=2 SV=1 - [Q9SVR1_ARATH]	56.78	5.67	1	1	1	1	282	33	4.67	1.12	0.986	1.277	0.779	0.968	0.829	0.858667	1.12767	0.761454	0.0567068
Q9ZVS5	Aspartyl protease-like protein OS=Arabidopsis thaliana GN=F15K9.16 PE=2 SV=1 - [Q9ZVS5_ARATH]	56.77	17.28	1	5	6	6	434	46.1	9.14	0.984	1.025	0.947	1.035	1.087	1.06	1.06067	0.985333	1.07645	0.0496806
Q9ZVN2	Acyltransferase-like protein At1g54570, chloroplastic OS=Arabidopsis thaliana GN=At1g54570 PE=2 SV=1 - [Y1457_ARATH]	56.7	3.69	1	2	2	2	704	78.2	7.93	1.055	0.96	1.049	0.971	0.912	1.073	0.985333	1.02133	0.964752	0.556445
Q9SN96	AT3g46430/F18L15_150 OS=Arabidopsis thaliana GN=F18L15.150 PE=2 SV=1 - [Q9SN96_ARATH]	56.69	38.18	1	2	2	3	55	6.6	10.15	0.883	0.888	0.922	1.056	1.182	1.117	1.11833	0.897667	1.24582	0.00453976
Q9C509	Sphingosine-1-phosphate lyase OS=Arabidopsis thaliana GN=DPL1 PE=1 SV=1 - [SGPL_ARATH]	56.6	3.49	1	1	1	1	544	59.4	7.96	0.955	0.933	1.036	1.083	1.062	1.018	1.05433	0.974667	1.08174	0.0957868
Q9LLR6	Non-specific lipid-transfer protein 4 OS=Arabidopsis thaliana GN=LTP4 PE=3 SV=1 - [NLTP4_ARATH]	56.58	17.86	1	1	2	10	112	11.4	8.75	0.916	0.792	0.834	1.181	1.353	1.072	1.202	0.847333	1.41857	0.0166594
O80988	Glycine dehydrogenase (decarboxylating) 2, mitochondrial OS=Arabidopsis thaliana GN=GLDP2 PE=2 SV=1 - [GCSP2_ARATH]	56.57	9.39	1	4	8	10	1044	113.7	6.65	1.031	0.947	1.034	1.091	0.971	1.015	1.02567	1.004	1.02158	0.656597
Q94B78	Glycine dehydrogenase (decarboxylating) 1, mitochondrial OS=Arabidopsis thaliana GN=GLDP1 PE=1 SV=2 - [GCSP1_ARATH]	56.47	6.46	3	1	5	7	1037	112.9	6.98	0.863	0.887	0.989	1.757	0.749	0.947	1.151	0.913	1.26068	0.486444
P83755	Photosystem II protein D1 OS=Arabidopsis thaliana GN=psbA PE=1 SV=2 - [PSBA_ARATH]	56.41	6.23	1	2	2	6	353	38.9	5.25	1.103	1.014	1.066	0.998	0.837	0.976	0.937	1.061	0.883129	0.0937181
Q8W108	1,2-dihydroxy-3-keto-5-methylthiopentene dioxygenase 3 OS=Arabidopsis thaliana GN=ARD3 PE=2 SV=1 - [MTND3_ARATH]	56.37	28.64	5	6	6	14	199	23.3	5.14	1.009	1.002	1.022	0.995	1.016	0.94	0.983667	1.011	0.972964	0.307727
Q9SFU1	60S ribosomal protein L13a-1 OS=Arabidopsis thaliana GN=RPL13AA PE=2 SV=1 - [R13A1_ARATH]	56.32	38.83	2	4	8	20	206	23.5	10.4	0.968	0.99	1.001	0.944	1.019	1.057	1.00667	0.986333	1.02062	0.588188
Q8LEG8	Dehydration stress-induced protein OS=Arabidopsis thaliana PE=2 SV=1 - [Q8LEG8_ARATH]	56.31	24.73	2	3	4	11	182	20	5.31	1.033	1.1	1.033	0.907	0.964	0.882	0.917667	1.05533	0.869551	0.0139804
Q8S944	Dynamin-related protein 3A OS=Arabidopsis thaliana GN=DRP3A PE=1 SV=2 - [DRP3A_ARATH]	56.28	4.08	5	3	3	5	808	89.6	6.44	1.083	1.118	0.999	0.964	0.952	0.907	0.941	1.06667	0.882188	0.0330825
Q9ZVJ4	Peptidyl-prolyl cis-trans isomerase CYP22 OS=Arabidopsis thaliana GN=CYP22 PE=2 SV=1 - [CYP22_ARATH]	56.25	23.62	3	4	5	7	199	21.5	8.18	0.866	0.9	0.954	1.039	1.12	1.134	1.09767	0.906667	1.21066	0.00817311
B3H749	L-galactose-1-phosphate phosphatase OS=Arabidopsis thaliana GN=VTC4 PE=4 SV=1 - [B3H749_ARATH]	56.23	13.43	3	3	3	5	268	28.8	5.5	1.087	1.017	1.082	0.854	1.008	1.047	0.969667	1.062	0.913057	0.217138
Q9LYU3	Ethylene-responsive transcription factor ERF113 OS=Arabidopsis thaliana GN=ERF113 PE=2 SV=1 - [EF113_ARATH]	56.23	8.49	1	1	1	1	212	24.3	8.76	1.003	0.856	0.902	0.941	1.156	1.233	1.11	0.920333	1.20608	0.123809
Q42593	L-ascorbate peroxidase T, chloroplastic OS=Arabidopsis thaliana GN=APXT PE=2 SV=2 - [APXT_ARATH]	56.17	21.6	5	5	8	11	426	46.1	7.28	1.054	1.121	1.112	0.851	0.924	0.864	0.879667	1.09567	0.80286	0.00216657
Q9SRI1	Protein transport protein SEC13 homolog A OS=Arabidopsis thaliana GN=SEC13A PE=1 SV=1 - [SC13A_ARATH]	56.16	28.48	1	6	8	11	302	32.6	6.05	1.024	1.063	1.029	0.94	0.975	0.929	0.948	1.03867	0.912709	0.00804683
Q9FMP4	Splicing factor 3B subunit 6-like protein OS=Arabidopsis thaliana GN=At5g12190 PE=2 SV=1 - [SF3B6_ARATH]	56.13	25	2	2	2	2	124	14.4	9.35	1.142	1.055	1.092	0.821	0.906	0.953	0.893333	1.09633	0.814837	0.0116817
Q0WW84	Polyadenylate-binding protein RBP47B OS=Arabidopsis thaliana GN=RBP47B PE=2 SV=1 - [RB47B_ARATH]	56.06	8.28	4	3	3	4	435	48.1	6.57	0.994	0.931	0.96	0.894	0.995	1.094	0.994333	0.961667	1.03397	0.618107
Q9FKS5	Cytochrome c1 2, heme protein, mitochondrial OS=Arabidopsis thaliana GN=CYC12 PE=1 SV=1 - [CYC1B_ARATH]	56.04	11.4	2	2	2	5	307	33.7	6.18	0.932	0.911	0.928	1.114	1.11	1.108	1.11067	0.923667	1.20245	9.65847e-06
O22827	Molybdopterin synthase catalytic subunit OS=Arabidopsis thaliana GN=MOCS2 PE=2 SV=1 - [MOC2B_ARATH]	56.02	9.09	1	2	2	2	198	22.2	6.09	0.862	0.986	0.863	1.085	1.145	1.154	1.128	0.903667	1.24825	0.00850649
Q94KD0	Transcription initiation factor TFIID subunit 15b OS=Arabidopsis thaliana GN=TAF15B PE=1 SV=1 - [TA15B_ARATH]	55.98	10.43	2	5	5	7	422	42.3	8.5	0.741	0.745	0.728	1.252	1.412	1.296	1.32	0.738	1.78862	0.000265375
C0Z2C1	AT1G48900 protein OS=Arabidopsis thaliana GN=At1g48900 PE=2 SV=1 - [C0Z2C1_ARATH]	55.94	13.56	4	3	5	6	450	49.6	8.22	1.071	1.067	1.141	0.985	0.858	0.911	0.918	1.093	0.83989	0.0164056
P93736	Valine--tRNA ligase, mitochondrial 1 OS=Arabidopsis thaliana GN=TWN2 PE=2 SV=2 - [SYVM1_ARATH]	55.91	11.37	2	12	12	14	1108	125.8	7.11	0.894	0.984	0.902	1.04	1.098	1.072	1.07	0.926667	1.15468	0.012594
P32746	Dihydroorotate dehydrogenase (quinone), mitochondrial OS=Arabidopsis thaliana GN=PYRD PE=1 SV=2 - [PYRD_ARATH]	55.86	11.74	1	4	4	5	460	48.5	9.2	0.994	0.888	1	1.007	0.967	1.1	1.02467	0.960667	1.06662	0.298599
Q9LV09	Protein BOBBER 1 OS=Arabidopsis thaliana GN=BOB1 PE=1 SV=1 - [BOB1_ARATH]	55.81	4.28	1	1	1	1	304	34.5	5.34	0.914	0.906	0.877	1.188	1.311	0.957	1.152	0.899	1.28142	0.0724458
O64517	Metacaspase-4 OS=Arabidopsis thaliana GN=AMC4 PE=1 SV=1 - [MCA4_ARATH]	55.76	6.94	2	3	3	3	418	45.5	4.82	0.74	0.842	0.802	1.261	1.238	1.16	1.21967	0.794667	1.53482	0.000567017
Q94C69	Cold shock domain-containing protein 3 OS=Arabidopsis thaliana GN=CSP3 PE=1 SV=1 - [CSP3_ARATH]	55.75	13.95	1	4	4	8	301	29.5	7.42	0.985	0.98	0.953	1.016	1.13	1.038	1.06133	0.972667	1.09116	0.0710226
P14671	Tryptophan synthase beta chain 1, chloroplastic OS=Arabidopsis thaliana GN=TSB1 PE=2 SV=1 - [TRPB1_ARATH]	55.68	12.55	3	6	6	8	470	50.9	6.84	1.016	1.104	1.077	0.892	0.928	0.975	0.931667	1.06567	0.874257	0.0193905
Q9LT39	Leucine-rich repeat-containing protein OS=Arabidopsis thaliana GN=At3g20820 PE=2 SV=1 - [Q9LT39_ARATH]	55.63	25.48	1	9	9	14	365	39.8	8.41	0.882	0.888	0.916	1.132	1.113	1.123	1.12267	0.895333	1.25391	4.31786e-05
Q9SJ66	Probable sucrose-phosphatase 2 OS=Arabidopsis thaliana GN=SPP2 PE=2 SV=2 - [SPP2_ARATH]	55.62	18.72	2	7	7	8	422	47.8	6.6	1.018	1.034	1.019	0.97	1.066	0.977	1.00433	1.02367	0.981114	0.570568
P56798	30S ribosomal protein S3, chloroplastic OS=Arabidopsis thaliana GN=rps3 PE=3 SV=1 - [RR3_ARATH]	55.59	12.84	1	2	2	3	218	25.2	9.48	1.141	1.107	1.119	0.826	0.849	0.924	0.866333	1.12233	0.771904	0.00120485
Q8RYE7	Defensin-like protein 196 OS=Arabidopsis thaliana GN=ATTI4 PE=3 SV=1 - [DF196_ARATH]	55.57	30.93	1	3	3	9	97	10.7	5.38	0.635	0.658	0.665	1.467	1.516	1.367	1.45	0.652667	2.22165	5.84125e-05
P56772	Chloroplastic ATP-dependent Clp protease proteolytic subunit 1 OS=Arabidopsis thaliana GN=clpP1 PE=1 SV=2 - [CLPP1_ARATH]	55.38	7.65	1	1	1	1	196	22.1	4.98	1.137	1.18	1.079	0.81	0.962	0.796	0.856	1.132	0.756184	0.0104279
B9DFH4	AT2G47510 protein OS=Arabidopsis thaliana GN=At2g47510 PE=2 SV=1 - [B9DFH4_ARATH]	55.38	11.18	6	4	4	4	492	53	7.88	1.073	0.941	0.959	0.969	0.949	1.062	0.993333	0.991	1.00235	0.967628
Q9SYB5	Probable dolichyl-diphosphooligosaccharide--protein glycosyltransferase subunit 3B OS=Arabidopsis thaliana GN=OST3B PE=2 SV=1 - [OST3B_ARATH]	55.34	3.47	1	1	1	2	346	38.8	9.31	1.058	1.052	0.962	0.985	1.114	0.869	0.989333	1.024	0.966146	0.676923
D8V0F4	Cytosolic S-allantoin synthase splice variant 2 OS=Arabidopsis thaliana GN=TTL PE=2 SV=1 - [D8V0F4_ARATH]	55.19	5.47	3	1	1	2	311	34.1	6.35	1.272	0.973	0.861	1.101	0.743	0.98	0.941333	1.03533	0.909208	0.591902
Q9LF37	Chaperone protein ClpB3, chloroplastic OS=Arabidopsis thaliana GN=CLPB3 PE=2 SV=1 - [CLPB3_ARATH]	55.05	3.51	2	2	3	4	968	108.9	6.23	1.031	1.115	0.971	0.907	0.897	0.971	0.925	1.039	0.890279	0.0754321
P19171	Basic endochitinase B OS=Arabidopsis thaliana GN=CHI-B PE=1 SV=3 - [CHIB_ARATH]	55.02	6.57	1	1	1	1	335	36.2	7.61	0.781	0.582	0.734	1.376	1.54	1.271	1.39567	0.699	1.99666	0.00212135
Q9SSQ8	26.5 kDa heat shock protein, mitochondrial OS=Arabidopsis thaliana GN=HSP26.5 PE=2 SV=1 - [HS26M_ARATH]	55.02	18.97	1	4	4	6	232	26.5	7.37	1.021	1.025	0.938	1.175	1.117	1.003	1.09833	0.994667	1.10422	0.148065
O82212	Putative uncharacterized protein At2g23820 OS=Arabidopsis thaliana GN=At2g23820 PE=4 SV=1 - [O82212_ARATH]	54.97	6.58	4	1	1	1	243	26.8	8.24	0.724	0.966	1.279	0.979	1.043	1.097	1.03967	0.989667	1.05052	0.775968
Q9FIK7	Probable acetyl-CoA acetyltransferase, cytosolic 2 OS=Arabidopsis thaliana GN=At5g47720 PE=2 SV=1 - [THIC2_ARATH]	54.96	33.49	3	9	9	13	415	43.3	6.43	1.04	0.962	0.998	1.003	0.897	1.052	0.984	1	0.984	0.769381
Q8RYC3	Expressed protein OS=Arabidopsis thaliana GN=At2g33845 PE=2 SV=1 - [Q8RYC3_ARATH]	54.88	25.27	1	3	3	3	182	20.1	9.33	1.147	0.961	1.135	0.946	0.83	1.029	0.935	1.081	0.86494	0.154606
Q8RW90	At1g12050/F12F1_8 OS=Arabidopsis thaliana GN=At1g12050 PE=2 SV=1 - [Q8RW90_ARATH]	54.85	12.59	2	4	4	4	421	46.1	5.55	1.038	0.966	1.02	1.051	1.074	0.96	1.02833	1.008	1.02017	0.645805
Q9MAL9	GRF1-interacting factor 2 OS=Arabidopsis thaliana GN=GIF2 PE=1 SV=1 - [GIF2_ARATH]	54.83	13.33	3	2	2	2	195	21	7.03	0.834	0.905	0.767	1.201	1.278	1.195	1.22467	0.835333	1.46608	0.00125365
Q9ZUA0	Dolichyl-diphosphooligosaccharide--protein glycosyltransferase subunit 1B OS=Arabidopsis thaliana GN=OST1B PE=2 SV=1 - [OST1B_ARATH]	54.74	5.39	1	2	2	3	464	52.2	8.34	1.002	1.023	1.073	1.07	0.857	1.038	0.988333	1.03267	0.957069	0.558646
Q93VH5	AT5g10730/MAJ23_90 OS=Arabidopsis thaliana GN=At5g10730 PE=2 SV=1 - [Q93VH5_ARATH]	54.73	12.89	2	3	3	5	287	31	9.55	1.064	1.152	0.981	0.872	0.949	0.924	0.915	1.06567	0.858617	0.0501683
Q93Z51	Probable inactive nicotinamidase At3g16190 OS=Arabidopsis thaliana GN=At3g16190 PE=2 SV=1 - [NIC4_ARATH]	54.72	20.92	1	3	3	3	196	21.8	6.11	1.057	1.094	0.976	0.941	0.99	0.791	0.907333	1.04233	0.870483	0.123091
Q9FK60	Superoxide dismutase [Cu-Zn] 3 OS=Arabidopsis thaliana GN=CSD3 PE=1 SV=1 - [SODC3_ARATH]	54.65	38.41	1	4	5	9	164	16.9	7.64	0.913	0.903	0.841	1.118	1.117	1.188	1.141	0.885667	1.2883	0.00142638
O04904	Dihydroorotase, mitochondrial OS=Arabidopsis thaliana GN=PYR4 PE=1 SV=1 - [PYRC_ARATH]	54.63	18.3	1	5	5	5	377	41.9	8.46	1.09	0.83	0.893	1.001	1.005	1.184	1.06333	0.937667	1.13402	0.272569
Q9FNX5	Dynamin-related protein 1E OS=Arabidopsis thaliana GN=DRP1E PE=1 SV=1 - [DRP1E_ARATH]	54.62	9.13	3	4	5	7	624	69.8	7.52	1.035	1.003	0.988	1.053	0.901	1.075	1.00967	1.00867	1.00099	0.986711
O22244	Pectin methylesterase inhibitor 6 OS=Arabidopsis thaliana GN=At2g47670 PE=4 SV=1 - [O22244_ARATH]	54.62	9.13	3	2	2	4	208	23.2	9.44	1.126	1.112	0.965	0.923	0.964	0.878	0.921667	1.06767	0.863253	0.0630469
Q6DBQ1	AT-hook motif nuclear-localized protein 25 OS=Arabidopsis thaliana GN=AHL25 PE=1 SV=1 - [AHL25_ARATH]	54.5	7.36	1	1	1	1	299	30.1	6.2	0.939	1.049	1.028	0.865	0.876	1.281	1.00733	1.00533	1.00199	0.989359
Q9FX60	Histone H3-like 1 OS=Arabidopsis thaliana GN=At1g13370 PE=2 SV=3 - [H3L1_ARATH]	54.48	23.53	2	1	5	11	136	15.3	11.17	1.186	1.258	1.147	0.765	0.802	0.719	0.762	1.197	0.636591	0.000422432
Q9LY14	Peptide methionine sulfoxide reductase A3 OS=Arabidopsis thaliana GN=MSRA3 PE=1 SV=1 - [MSRA3_ARATH]	54.47	24.75	3	3	5	9	202	22.5	5.57	0.904	0.98	0.948	1.078	1.09	1.112	1.09333	0.944	1.15819	0.003489
B9DHI0	AT1G56110 protein (Fragment) OS=Arabidopsis thaliana GN=At1g56110 PE=2 SV=1 - [B9DHI0_ARATH]	54.41	15.51	4	6	6	8	432	48.4	8.09	0.935	1.012	0.944	1.042	1.091	1.105	1.07933	0.963667	1.12003	0.0200897
Q9CAP8	Long chain acyl-CoA synthetase 9, chloroplastic OS=Arabidopsis thaliana GN=LACS9 PE=1 SV=1 - [LACS9_ARATH]	54.35	10.27	1	4	4	5	691	76.1	6.98	0.961	1	0.968	1.057	1.008	1.077	1.04733	0.976333	1.07272	0.040376
O80568	Inositol 1,3,4-trisphosphate 5/6-kinase 4 OS=Arabidopsis thaliana GN=ITPK4 PE=1 SV=2 - [ITPK4_ARATH]	54.24	7.58	1	3	3	3	488	54.1	5.41	0.977	1.036	0.92	0.922	1.083	0.869	0.958	0.977667	0.979884	0.799714
P51418	60S ribosomal protein L18a-2 OS=Arabidopsis thaliana GN=RPL18AB PE=2 SV=2 - [R18A2_ARATH]	54.23	21.91	3	2	5	17	178	21.3	10.48	1.008	1.064	1.179	1.078	0.735	1.014	0.942333	1.08367	0.869579	0.292562
Q9LUD4	60S ribosomal protein L18a-3 OS=Arabidopsis thaliana GN=RPL18AC PE=2 SV=1 - [R18A3_ARATH]	54.23	23.6	2	1	4	15	178	21.3	10.35	1.091	1.058	1.027	0.916	0.955	0.966	0.945667	1.05867	0.893262	0.00912694
B9DHR5	AT5G23890 protein (Fragment) OS=Arabidopsis thaliana GN=At5g23890 PE=2 SV=1 - [B9DHR5_ARATH]	54.23	5.84	4	4	4	4	805	88.8	4.56	0.94	1.092	0.97	1.006	1.052	0.948	1.002	1.00067	1.00133	0.981942
Q9M8X6	Germin-like protein subfamily 1 member 6 OS=Arabidopsis thaliana GN=At3g04200 PE=2 SV=1 - [GL16_ARATH]	54.13	18.06	1	3	3	3	227	24.9	9.67	0.968	0.97	0.931	1.106	1.082	1.113	1.10033	0.956333	1.15058	0.000799348
Q9LTR9	Glycylpeptide N-tetradecanoyltransferase 1 OS=Arabidopsis thaliana GN=NMT1 PE=1 SV=2 - [NMT1_ARATH]	54.13	7.14	1	2	2	2	434	49.8	6.8	1.02	1.079	1.043	0.951	1.025	0.864	0.946667	1.04733	0.903883	0.112236
Q9T0I9	EF-Hand containing protein-like OS=Arabidopsis thaliana GN=At4g38810 PE=2 SV=1 - [Q9T0I9_ARATH]	54.12	16.53	2	5	5	8	375	41.1	4.63	0.914	0.991	1.094	0.925	0.947	1.096	0.989333	0.999667	0.989663	0.896878
P49689	40S ribosomal protein S30 OS=Arabidopsis thaliana GN=RPS30A PE=3 SV=3 - [RS30_ARATH]	54.09	16.13	1	1	1	4	62	6.9	12.23	0.967	0.882	0.954	1.089	1.109	1.064	1.08733	0.934333	1.16375	0.00654981
O82230	Nucleoid-associated protein At2g24020, chloroplastic OS=Arabidopsis thaliana GN=At2g24020 PE=2 SV=2 - [EBFC2_ARATH]	54.05	25.82	2	4	4	5	182	19.8	9.1	1.078	0.997	1.111	1.011	0.949	0.906	0.955333	1.062	0.899561	0.0792743
Q9C6B3	Gamma carbonic anhydrase 2, mitochondrial OS=Arabidopsis thaliana GN=GAMMACA2 PE=1 SV=1 - [GCA2_ARATH]	53.98	30.94	1	4	7	10	278	30	7.24	1.055	1.134	1.035	0.919	0.948	0.856	0.907667	1.07467	0.844603	0.0147304
O82462	Glutamate--tRNA ligase, cytoplasmic OS=Arabidopsis thaliana GN=At5g26707 PE=1 SV=1 - [SYEC_ARATH]	53.95	16.83	3	13	13	16	719	81	7.03	0.911	1.048	0.966	1.089	0.99	1.022	1.03367	0.975	1.06017	0.300247
O04090	Ferredoxin-1, chloroplastic OS=Arabidopsis thaliana GN=FD1 PE=1 SV=1 - [FER1_ARATH]	53.94	6.76	2	1	1	7	148	15.9	4.54	1.268	1.152	1.307	0.666	0.789	0.62	0.691667	1.24233	0.556748	0.00130986
Q9FKV6	Eukaryotic translation initiation factor 3 subunit D OS=Arabidopsis thaliana GN=At5g44320 PE=2 SV=1 - [Q9FKV6_ARATH]	53.88	13.44	1	1	6	9	588	66.2	5.63	0.963	0.967	1.019	0.816	0.874	1.398	1.02933	0.983	1.04713	0.815519
Q9MAB3	Probable nucleolar protein 5-2 OS=Arabidopsis thaliana GN=NOP5-2 PE=2 SV=1 - [NOP5B_ARATH]	53.83	18.2	1	5	7	11	533	59	9.22	1.081	0.944	1	1.035	1.006	0.978	1.00633	1.00833	0.998017	0.965162
Q680A5	Ribose-phosphate pyrophosphokinase 4 OS=Arabidopsis thaliana GN=PRS4 PE=1 SV=2 - [KPRS4_ARATH]	53.71	21.96	1	6	6	6	337	37.5	6.46	0.957	0.94	0.954	1.048	1.038	1.096	1.06067	0.950333	1.1161	0.00408963
Q94AD1	Putative DNA-binding protein At1g48610 OS=Arabidopsis thaliana GN=At1g48610 PE=1 SV=1 - [D1861_ARATH]	53.64	53.77	2	7	7	8	212	21.7	11.41	0.941	0.977	1.029	1.108	1.026	1.043	1.059	0.982333	1.07805	0.0984665
Q00218	Phospho-2-dehydro-3-deoxyheptonate aldolase 2, chloroplastic OS=Arabidopsis thaliana GN=DHS2 PE=2 SV=2 - [AROG_ARATH]	53.6	8.88	5	4	4	4	507	56.1	8.78	1.104	1.002	1.021	1.017	0.941	0.974	0.977333	1.04233	0.93764	0.164685
F4HTI7	Secretory carrier-associated membrane protein 3 OS=Arabidopsis thaliana GN=SC3 PE=1 SV=1 - [F4HTI7_ARATH]	53.48	9.85	4	2	2	5	274	30.9	7.46	0.962	0.925	1.017	0.945	0.977	1.052	0.991333	0.968	1.0241	0.60371
Q9SD76	Alpha-glucan phosphorylase 2, cytosolic OS=Arabidopsis thaliana GN=PHS2 PE=1 SV=1 - [PHS2_ARATH]	53.33	14.15	1	8	8	8	841	95.1	6.11	1.024	1.114	0.988	0.926	1.003	0.964	0.964333	1.042	0.925464	0.149217
Q9M2Q9	Putative uncharacterized protein T10K17.100 OS=Arabidopsis thaliana GN=T10K17.100 PE=4 SV=1 - [Q9M2Q9_ARATH]	53.28	10	3	4	4	5	570	62.4	5.74	0.951	0.946	1.019	1.078	0.958	1.039	1.025	0.972	1.05453	0.280076
Q9LEY1	Serine carboxypeptidase-like 35 OS=Arabidopsis thaliana GN=SCPL35 PE=2 SV=1 - [SCP35_ARATH]	53.26	9.79	1	3	3	5	480	53.6	7.9	0.947	0.915	0.975	1.031	1.11	1.138	1.093	0.945667	1.1558	0.0155417
Q9FMG0	2-nitropropane dioxygenase-like protein OS=Arabidopsis thaliana GN=At5g64250 PE=1 SV=1 - [Q9FMG0_ARATH]	53.21	33.33	2	10	10	16	333	36	5.55	1.023	1.03	0.968	0.985	1.016	1.018	1.00633	1.007	0.999338	0.977609
Q9CA23	Ubiquitin-fold modifier 1 OS=Arabidopsis thaliana GN=At1g77710 PE=3 SV=1 - [UFM1_ARATH]	53.2	32.26	1	3	3	10	93	9.9	9.25	0.656	0.664	0.677	1.45	1.463	1.355	1.42267	0.665667	2.13721	2.57853e-05
Q9ZV24	Outer envelope pore protein 16-1, chloroplastic OS=Arabidopsis thaliana GN=OEP161 PE=1 SV=1 - [OP161_ARATH]	53.17	31.76	1	4	4	5	148	15.5	9.13	1.021	1.064	1.043	1.012	0.98	0.985	0.992333	1.04267	0.951726	0.0340164
W8PVB6	Glycosyltransferase (Fragment) OS=Arabidopsis thaliana GN=AT1G22370 PE=2 SV=1 - [W8PVB6_ARATH]	53.05	5.83	2	1	1	1	309	35	4.79	0.964	1.078	0.907	0.929	1.079	1.111	1.03967	0.983	1.05765	0.493731
B9DGV9	AT2G27450 protein OS=Arabidopsis thaliana GN=At2g27450 PE=2 SV=1 - [B9DGV9_ARATH]	53.05	13.04	2	2	2	2	299	33.5	6.05	0.77	1.084	0.938	1	1.177	1.078	1.085	0.930667	1.16583	0.212608
Q9FXD4	Signal recognition particle subunit SRP72 OS=Arabidopsis thaliana GN=At1g67680 PE=2 SV=1 - [Q9FXD4_ARATH]	53.04	16.57	3	10	10	13	664	73	8.82	0.983	1.013	0.995	1.027	1.046	0.982	1.01833	0.997	1.0214	0.364748
Q8RXN1	Carboxylate clamp-tetratricopeptide repeat protein OS=Arabidopsis thaliana GN=At1g04190 PE=2 SV=1 - [Q8RXN1_ARATH]	53.03	12.5	3	4	4	4	328	37.2	8.79	1.018	0.915	1.023	1.108	0.942	1.085	1.045	0.985333	1.06055	0.395385
P49572	Indole-3-glycerol phosphate synthase, chloroplastic OS=Arabidopsis thaliana GN=IGPS PE=1 SV=2 - [TRPC_ARATH]	53	13.68	1	5	5	7	402	44.5	7.39	0.981	1.142	1.003	0.91	0.948	0.968	0.942	1.042	0.904031	0.133298
Q9CAX7	Putative small nuclear ribonucleoprotein polypeptide G OS=Arabidopsis thaliana GN=F24K9.17 PE=2 SV=1 - [Q9CAX7_ARATH]	52.99	29.11	3	2	2	3	79	8.7	8.53	1.134	0.91	0.817	1.101	1.153	0.922	1.05867	0.953667	1.1101	0.421097
Q2HIQ2	At1g01170 OS=Arabidopsis thaliana GN=At1g01170 PE=2 SV=1 - [Q2HIQ2_ARATH]	52.98	49.4	3	4	4	6	83	9.1	9.7	0.839	0.96	0.883	1.196	1.169	1.124	1.163	0.894	1.30089	0.00282348
Q8L9C1	Proteasome assembly chaperone 2 OS=Arabidopsis thaliana PE=2 SV=1 - [Q8L9C1_ARATH]	52.95	3.2	2	1	1	1	281	30.9	4.69	1.061	0.902	0.975	0.968	1.028	1.122	1.03933	0.979333	1.06127	0.402823
F4HXD1	ADP-glucose pyrophosphorylase family protein OS=Arabidopsis thaliana GN=At1g74910 PE=1 SV=1 - [F4HXD1_ARATH]	52.94	9.82	6	3	3	3	387	42.9	8.56	0.966	1.113	0.906	0.928	0.976	1.136	1.01333	0.995	1.01843	0.845056
Q42335	MIF homologue (Fragment) OS=Arabidopsis thaliana PE=2 SV=1 - [Q42335_ARATH]	52.92	22.81	4	2	2	5	114	12	6.62	0.722	0.635	0.742	1.357	1.532	1.255	1.38133	0.699667	1.97427	0.00145151
Q8LDA3	Sts14 OS=Arabidopsis thaliana GN=At5g66590 PE=2 SV=1 - [Q8LDA3_ARATH]	52.89	19.46	2	2	2	2	185	20.1	9.64	1.069	1.071	1.1	0.951	0.938	0.876	0.921667	1.08	0.853395	0.00328394
Q8W4F1	Probable plastid-lipid-associated protein 10, chloroplastic OS=Arabidopsis thaliana GN=PAP10 PE=2 SV=1 - [PAP10_ARATH]	52.89	10.56	1	2	2	2	284	31.6	8.16	1.068	1.083	1.101	1.033	0.858	0.861	0.917333	1.084	0.846248	0.0467202
P82869	Peptidyl-prolyl cis-trans isomerase CYP37, chloroplastic OS=Arabidopsis thaliana GN=CYP37 PE=1 SV=3 - [CYP37_ARATH]	52.88	10.73	1	4	4	5	466	50.5	7.06	1.015	0.951	0.959	1.034	0.987	1.148	1.05633	0.975	1.08342	0.191924
Q42268	Alcohol dehydrogenase (Fragment) OS=Arabidopsis thaliana PE=2 SV=1 - [Q42268_ARATH]	52.83	8.82	1	1	2	7	102	10.4	7.18	0.906	0.947	0.967	1.074	1.167	1.05	1.097	0.94	1.16702	0.0170924
Q43316	Porphobilinogen deaminase, chloroplastic OS=Arabidopsis thaliana GN=HEMC PE=1 SV=1 - [HEM3_ARATH]	52.75	17.02	3	6	6	9	382	41	8.47	1.161	1.03	1.045	0.967	0.88	0.899	0.915333	1.07867	0.848578	0.0292011
Q9SZ41	AT4g27020/F10M23_360 OS=Arabidopsis thaliana GN=F10M23.360 PE=2 SV=1 - [Q9SZ41_ARATH]	52.63	3.06	1	1	1	1	523	59.6	5.4	0.883	1.011	1.04	1.148	0.972	1.045	1.055	0.978	1.07873	0.3345
Q9ZRT5	Glutathione S-transferase T1 OS=Arabidopsis thaliana GN=GSTT1 PE=2 SV=1 - [GSTT1_ARATH]	52.63	23.27	2	5	5	7	245	27.6	9.48	1.041	1.082	1.059	0.926	0.891	0.912	0.909667	1.06067	0.857637	0.000641832
Q9LV66	Uncharacterized protein At5g48480 OS=Arabidopsis thaliana GN=At5g48480 PE=1 SV=1 - [Y5848_ARATH]	52.59	26.51	1	4	4	7	166	17.5	4.88	0.93	0.962	1.033	0.996	1.072	1.022	1.03	0.975	1.05641	0.218672
O65202	Peroxisomal acyl-coenzyme A oxidase 1 OS=Arabidopsis thaliana GN=ACX1 PE=1 SV=1 - [ACOX1_ARATH]	52.56	24.4	3	16	16	20	664	74.3	7.66	0.932	0.935	0.963	1.116	1.085	1.061	1.08733	0.943333	1.15265	0.00154017
Q1PE68	Oil body-associated protein 2B OS=Arabidopsis thaliana GN=OBAP2B PE=2 SV=1 - [OBP2B_ARATH]	52.47	25.51	1	4	5	6	247	27.7	7.75	1.012	0.959	0.973	1.073	0.93	1.069	1.024	0.981333	1.04348	0.438313
Q8LPS1	Long chain acyl-CoA synthetase 6, peroxisomal OS=Arabidopsis thaliana GN=LACS6 PE=1 SV=1 - [LACS6_ARATH]	52.36	18.4	1	9	10	13	701	76.6	7.93	0.969	0.989	1.005	1.051	0.981	0.998	1.01	0.987667	1.02261	0.395952
O48782	Heme oxygenase 1, chloroplastic OS=Arabidopsis thaliana GN=HO1 PE=1 SV=2 - [HMOX1_ARATH]	52.3	4.61	1	1	1	1	282	32.7	6.95	1.248	0.982	0.969	0.936	0.834	1.018	0.929333	1.06633	0.871522	0.263293
Q9LR30	Glutamate--glyoxylate aminotransferase 1 OS=Arabidopsis thaliana GN=GGAT1 PE=1 SV=1 - [GGT1_ARATH]	52.29	22.66	1	2	9	17	481	53.3	6.89	1.176	0.883	1.072	0.84	1.021	0.993	0.951333	1.04367	0.91153	0.418877
O04509	F21M12.26 protein OS=Arabidopsis thaliana GN=F21M12.26 PE=3 SV=1 - [O04509_ARATH]	52.21	8.76	3	4	4	4	468	52.8	8.37	1.044	1.004	1.05	0.995	0.945	0.964	0.968	1.03267	0.937379	0.0344314
Q8RXS0	Putative NAD(P)H oxidoreductase, isoflavone reductase OS=Arabidopsis thaliana GN=At4g39230 PE=2 SV=1 - [Q8RXS0_ARATH]	52.16	5.84	5	1	2	3	308	34.1	7.09	1.232	1.038	1.102	0.971	0.664	0.951	0.862	1.124	0.766904	0.0838725
Q9CB01	Ras-related protein RABF1 OS=Arabidopsis thaliana GN=RABF1 PE=1 SV=1 - [RABF1_ARATH]	52.15	12.38	2	1	2	2	202	21.9	6.58	0.981	1.143	1.218	0.94	0.889	0.827	0.885333	1.114	0.794734	0.0414576
B3H4S6	Dicarboxylate transporter 1 OS=Arabidopsis thaliana GN=DiT1 PE=4 SV=1 - [B3H4S6_ARATH]	52.13	1.8	2	1	1	2	556	59	9.73	1.523	0.917	0.863	0.803	0.879	0.723	0.801667	1.101	0.728126	0.238632
O82264	NPL4-like protein 2 OS=Arabidopsis thaliana GN=At2g47970 PE=1 SV=1 - [NPL42_ARATH]	52.12	6.05	1	2	2	3	413	46.1	5.15	0.926	0.958	1.018	1.058	0.965	1.062	1.02833	0.967333	1.06306	0.216511
Q9SUR3	Reticulon-like protein B1 OS=Arabidopsis thaliana GN=RTNLB1 PE=1 SV=1 - [RTNLA_ARATH]	52.05	33.82	5	6	13	24	275	30.5	8.29	1.144	1.165	1.213	0.781	0.834	0.774	0.796333	1.174	0.678308	0.00017124
Q9XII1	Plastid division protein PDV2 OS=Arabidopsis thaliana GN=PDV2 PE=1 SV=1 - [PDV2_ARATH]	51.99	5.54	1	1	1	1	307	33.6	5.41	1.143	0.935	0.732	0.984	1.298	0.996	1.09267	0.936667	1.16655	0.376478
Q41188	Cold shock protein 2 OS=Arabidopsis thaliana GN=CSP2 PE=1 SV=1 - [CSP2_ARATH]	51.96	10.34	1	1	1	5	203	19.1	5.92	0.929	0.919	0.999	1.074	1.053	1.092	1.073	0.949	1.13066	0.0108477
Q9LHE5	Mitochondrial import receptor subunit TOM40-1 OS=Arabidopsis thaliana GN=TOM40-1 PE=1 SV=3 - [TO401_ARATH]	51.86	13.59	3	4	4	6	309	34.2	6.81	1.044	0.909	0.968	1.043	0.913	1.096	1.01733	0.973667	1.04485	0.549833
P59230	60S ribosomal protein L10a-2 OS=Arabidopsis thaliana GN=RPL10AB PE=1 SV=1 - [R10A2_ARATH]	51.79	47.22	1	5	12	29	216	24.4	9.88	0.945	1.096	1.072	1.022	1	0.949	0.990333	1.03767	0.954385	0.410856
A0A097PSZ6	Regulatory particle non-ATPase 13 (Fragment) OS=Arabidopsis thaliana PE=2 SV=1 - [A0A097PSZ6_ARATH]	51.77	9.18	3	2	2	2	294	32.7	4.45	1.11	1.018	0.965	0.912	0.974	1.026	0.970667	1.031	0.941481	0.32382
Q8S8L0	Putative prolylcarboxypeptidase OS=Arabidopsis thaliana GN=At2g24280 PE=4 SV=1 - [Q8S8L0_ARATH]	51.77	10.08	2	4	4	5	476	54.4	7.71	1.089	1.032	1.029	1.001	0.962	0.92	0.961	1.05	0.915238	0.0431758
Q9SQZ9	PITH domain-containing protein At3g04780 OS=Arabidopsis thaliana GN=At3g04780 PE=1 SV=2 - [PITH1_ARATH]	51.66	21.59	1	3	3	3	176	19.7	5.03	0.929	0.909	0.885	1.132	1.064	1.178	1.12467	0.907667	1.23907	0.00361551
Q9C5H4	VHS domain-containing protein At3g16270 OS=Arabidopsis thaliana GN=At3g16270 PE=1 SV=1 - [Y3627_ARATH]	51.65	2.17	2	1	1	1	690	74.8	5.58	0.994	1.071	1.097	0.937	1.06	0.873	0.956667	1.054	0.907653	0.197155
A7WM73	Beta-hexosaminidase 1 OS=Arabidopsis thaliana GN=HEXO1 PE=1 SV=1 - [HEXO1_ARATH]	51.58	11.09	1	5	6	9	541	61.2	6.27	0.944	1.018	0.959	1.03	1.037	1.003	1.02333	0.973667	1.05101	0.116302
Q9LFG2	Diaminopimelate epimerase, chloroplastic OS=Arabidopsis thaliana GN=DAPF PE=1 SV=1 - [DAPF_ARATH]	51.58	8.84	1	3	3	3	362	39	5.68	1.04	1.053	0.915	0.783	0.877	0.931	0.863667	1.00267	0.86137	0.0873226
Q9LN66	At1g19320 OS=Arabidopsis thaliana GN=At1g19320 PE=2 SV=1 - [Q9LN66_ARATH]	51.56	10.53	2	2	2	2	247	25.4	6.46	1.247	1.129	1.344	0.627	0.661	0.831	0.706333	1.24	0.569624	0.00382425
Q9LHH7	Bifunctional protein FolD 2 OS=Arabidopsis thaliana GN=FOLD2 PE=2 SV=1 - [FOLD2_ARATH]	51.54	19.4	2	5	5	5	299	31.6	8.16	1.108	0.993	1.044	0.983	0.988	0.926	0.965667	1.04833	0.921145	0.0998856
Q8RXN3	Phosphoenolpyruvate/phosphate translocator 1, chloroplastic OS=Arabidopsis thaliana GN=PPT1 PE=1 SV=1 - [PPT1_ARATH]	51.48	3.43	1	1	1	2	408	44.2	10.15	1.08	1.283	0.914	0.911	0.941	0.848	0.9	1.09233	0.823924	0.155759
Q9SEU7	Thioredoxin M3, chloroplastic OS=Arabidopsis thaliana GN=GAT1 PE=2 SV=2 - [TRXM3_ARATH]	51.47	12.14	2	2	2	3	173	19.5	8.35	0.822	0.872	0.898	1.098	1.158	1.164	1.14	0.864	1.31944	0.000845366
Q0WRA3	ATPase E1 OS=Arabidopsis thaliana GN=ATE1 PE=1 SV=1 - [Q0WRA3_ARATH]	51.46	18.08	2	3	3	4	177	19.8	4.78	0.958	0.921	0.892	1.234	0.99	0.989	1.071	0.923667	1.15951	0.153203
O48962	Probable 3-beta-hydroxysteroid-Delta(8),Delta(7)-isomerase OS=Arabidopsis thaliana GN=At1g20050 PE=2 SV=1 - [EBP_ARATH]	51.44	10.31	2	2	2	2	223	25.1	8.54	0.849	1.175	1.179	1.147	0.917	0.795	0.953	1.06767	0.892601	0.488153
O23455	Putative uncharacterized protein AT4g16060 OS=Arabidopsis thaliana GN=dl4070w PE=4 SV=1 - [O23455_ARATH]	51.43	4.74	2	1	1	1	274	31.1	7.71	1.079	0.922	0.831	1.108	1.099	1.056	1.08767	0.944	1.15219	0.124873
Q94A97	Ubiquitin-conjugating enzyme E2 35 OS=Arabidopsis thaliana GN=UBC35 PE=1 SV=1 - [UBC35_ARATH]	51.42	37.25	4	5	5	8	153	17.2	7.34	0.876	0.787	0.757	1.254	1.259	1.218	1.24367	0.806667	1.54174	0.000326225
Q9ZV96	F9K20.18 protein OS=Arabidopsis thaliana GN=F9K20.18 PE=4 SV=1 - [Q9ZV96_ARATH]	51.38	5.43	1	1	1	1	276	31.5	5.05	1.104	0.949	1.057	0.952	0.968	0.993	0.971	1.03667	0.936656	0.238272
O80575	6,7-dimethyl-8-ribityllumazine synthase, chloroplastic OS=Arabidopsis thaliana GN=At2g44050 PE=2 SV=1 - [RISB_ARATH]	51.36	17.18	1	3	3	5	227	24	8.35	0.934	1.077	1.019	0.949	1.064	0.899	0.970667	1.01	0.961056	0.572715
Q9CAI1	Developmentally-regulated G-protein 2 OS=Arabidopsis thaliana GN=DRG2 PE=2 SV=1 - [DRG2_ARATH]	51.25	4.26	2	1	1	1	399	44.8	8.87	1.09	1.047	0.778	0.772	0.827	1.51	1.03633	0.971667	1.06655	0.81349
Q8RV68	Expressed protein OS=Arabidopsis thaliana GN=At2g31725 PE=2 SV=1 - [Q8RV68_ARATH]	51.18	30.2	1	3	3	3	149	17.5	6.38	0.829	0.916	0.905	1.148	1.067	1.271	1.162	0.883333	1.31547	0.0129814
Q9LNU4	26S proteasome non-ATPase regulatory subunit 3 homolog A OS=Arabidopsis thaliana GN=RPN3A PE=1 SV=3 - [PSD3A_ARATH]	51.15	29.71	3	14	14	24	488	55.5	8.19	1.025	1.056	1.011	0.962	0.972	1.017	0.983667	1.03067	0.954398	0.0942654
Q0WV90	Topless-related protein 1 OS=Arabidopsis thaliana GN=TPR1 PE=1 SV=3 - [TPR1_ARATH]	51.12	6.96	7	5	6	7	1120	124	7.14	1.042	0.92	0.944	1.006	1.023	1.164	1.06433	0.968667	1.09876	0.200305
A1L4Y1	At3g10350 OS=Arabidopsis thaliana GN=At3g10350 PE=1 SV=1 - [A1L4Y1_ARATH]	51.11	19.22	5	6	6	9	411	44.7	7.78	1.052	1.122	1.062	0.918	0.876	0.906	0.9	1.07867	0.834363	0.00208184
Q8LC58	Photosystem I reaction center subunit IV B, chloroplast (PSI-E B) OS=Arabidopsis thaliana PE=2 SV=1 - [Q8LC58_ARATH]	51.06	13.29	6	2	2	2	143	15	9.95	1.127	1.251	1.151	0.787	0.822	0.774	0.794333	1.17633	0.675262	0.000710242
Q9SE60	Methylenetetrahydrofolate reductase 1 OS=Arabidopsis thaliana GN=MTHFR1 PE=1 SV=1 - [MTHR1_ARATH]	51.03	14.36	3	5	7	7	592	66.2	5.82	1.023	1.139	1.021	0.935	0.985	0.98	0.966667	1.061	0.91109	0.0886591
O80474	Methylesterase 4 OS=Arabidopsis thaliana GN=MES4 PE=1 SV=1 - [MES4_ARATH]	50.93	12.17	3	2	2	2	263	29.6	7.14	0.943	1	0.98	1.036	1.093	1.025	1.05133	0.974333	1.07903	0.04575
Q9SHC8	Vesicle-associated protein 1-2 OS=Arabidopsis thaliana GN=PVA12 PE=1 SV=1 - [VAP12_ARATH]	50.81	19.25	1	4	4	5	239	26.4	8.81	1.139	1.037	1.077	0.925	0.836	0.884	0.881667	1.08433	0.813096	0.0066922
O81826	Probable histone H2A.3 OS=Arabidopsis thaliana GN=At4g27230 PE=1 SV=1 - [H2A3_ARATH]	50.76	18.32	1	1	3	9	131	13.8	10.05	1.082	1.101	1.072	0.916	0.887	0.932	0.911667	1.085	0.840246	0.000380528
O65386	F12F1.20 protein OS=Arabidopsis thaliana GN=F12F1.20 PE=1 SV=1 - [O65386_ARATH]	50.67	19.61	3	4	4	5	255	27.7	5.2	1.031	1.046	1.071	0.872	1	0.918	0.93	1.04933	0.886277	0.0382738
Q9ASS2	Protein FREE1 OS=Arabidopsis thaliana GN=FREE1 PE=1 SV=1 - [FREE1_ARATH]	50.67	18.14	2	8	8	10	601	65.4	6.79	0.795	0.778	0.816	1.178	1.211	1.229	1.206	0.796333	1.51444	2.48357e-05
Q94AU7	Gamma carbonic anhydrase 3, mitochondrial OS=Arabidopsis thaliana GN=GAMMACA3 PE=1 SV=1 - [GCA3_ARATH]	50.66	25.97	2	2	6	8	258	27.8	7.27	0.932	0.965	0.85	1.073	1.044	1.233	1.11667	0.915667	1.21951	0.0417012
Q93VK7	AT5g14910/F2G14_30 OS=Arabidopsis thaliana GN=At5g14910 PE=2 SV=1 - [Q93VK7_ARATH]	50.63	7.87	1	1	1	1	178	18.9	5.27	0.899	1.056	1.005	0.87	1.07	1.163	1.03433	0.986667	1.04831	0.652236
Q9C787	Putative uncharacterized protein At1g69510 OS=Arabidopsis thaliana GN=F10D13_16 PE=1 SV=1 - [Q9C787_ARATH]	50.61	8.76	1	1	1	1	137	15.1	5.06	0.586	0.658	0.614	1.254	1.479	1.73	1.48767	0.619333	2.40205	0.00335309
Q39255	SKP1-like protein 1A OS=Arabidopsis thaliana GN=SKP1A PE=1 SV=1 - [SKP1A_ARATH]	50.61	13.13	4	2	3	3	160	17.8	4.54	0.953	1.001	0.995	0.85	0.972	1.224	1.01533	0.983	1.03289	0.785585
Q0WLJ0	Peroxisomal-3-keto-acyl-CoA thiolase 1 OS=Arabidopsis thaliana GN=At5g48880 PE=2 SV=1 - [Q0WLJ0_ARATH]	50.54	8.21	2	1	3	7	414	43.1	6.79	1.135	0.836	0.969	1.157	0.902	1.066	1.04167	0.98	1.06293	0.617935
O80983	ATP-dependent zinc metalloprotease FTSH 4, mitochondrial OS=Arabidopsis thaliana GN=FTSH4 PE=1 SV=2 - [FTSH4_ARATH]	50.51	4.32	1	3	3	3	717	77.2	8.62	1.04	1.004	1.014	0.969	1.001	0.943	0.971	1.01933	0.952583	0.0721772
Q9M024	Thylakoid ADP,ATP carrier protein, chloroplastic OS=Arabidopsis thaliana GN=TAAC PE=1 SV=1 - [TAAC_ARATH]	50.48	25.06	1	9	9	10	415	45.1	9.8	1.082	1.072	1.184	0.844	0.866	0.903	0.871	1.11267	0.782804	0.003685
O23830	mRNA (Fragment) OS=Arabidopsis thaliana PE=2 SV=1 - [O23830_ARATH]	50.44	16.06	5	2	2	5	193	20.3	9.45	0.928	1.182	0.937	0.995	0.997	0.96	0.984	1.01567	0.968822	0.725548
F4J0P2	Transducin/WD40 domain-containing protein OS=Arabidopsis thaliana GN=At3g50590 PE=4 SV=1 - [F4J0P2_ARATH]	50.35	0.74	1	1	1	1	1614	176.2	8.32	NA	NA	NA	NA	NA	NA	NA	NA	NA	NA
Q9S9W2	Short-chain dehydrogenase/reductase SDRA OS=Arabidopsis thaliana GN=SDRA PE=1 SV=1 - [SDRA_ARATH]	50.34	13.78	2	3	3	3	254	26.7	8.38	1.028	1.212	0.986	0.872	1.018	0.945	0.945	1.07533	0.878797	0.183727
Q9SJA6	Serine/arginine-rich splicing factor RSZ22A OS=Arabidopsis thaliana GN=RSZ22A PE=1 SV=1 - [RZ22A_ARATH]	50.32	17.35	1	1	4	5	196	21.9	11.34	0.977	0.83	0.774	1.133	1.325	1.117	1.19167	0.860333	1.38512	0.0213028
Q9S757	Bifunctional L-3-cyanoalanine synthase/cysteine synthase C1, mitochondrial OS=Arabidopsis thaliana GN=CYSC1 PE=1 SV=1 - [CYSC1_ARATH]	50.24	18.21	2	7	7	9	368	39.9	8.54	1.028	1.066	1.132	0.985	0.97	0.987	0.980667	1.07533	0.911965	0.0373532
A8MSF2	Rubredoxin family protein OS=Arabidopsis thaliana GN=ENH1 PE=4 SV=1 - [A8MSF2_ARATH]	50.21	35.27	2	5	5	5	224	23.9	9.86	0.93	0.889	0.992	1.159	1.109	1.045	1.10433	0.937	1.17858	0.0198434
Q9SWG0	Isovaleryl-CoA dehydrogenase, mitochondrial OS=Arabidopsis thaliana GN=IVD PE=1 SV=2 - [IVD_ARATH]	50.15	12.47	2	4	4	4	409	44.7	7.53	1.008	1.05	1.081	0.968	0.965	0.957	0.963333	1.04633	0.920675	0.0178808
Q9LS40	Protein ASPARTIC PROTEASE IN GUARD CELL 1 OS=Arabidopsis thaliana GN=ASPG1 PE=1 SV=1 - [ASPG1_ARATH]	50.14	16	1	7	7	12	500	53.2	5.52	1.045	1.05	1.087	0.969	0.889	0.872	0.91	1.06067	0.857951	0.00998196
Q9FJ62	Glycerophosphodiester phosphodiesterase GDPDL4 OS=Arabidopsis thaliana GN=GDPDL4 PE=1 SV=1 - [GPDL4_ARATH]	50.1	6.53	1	4	4	4	766	84.1	5.67	0.966	1.07	1.119	1.002	0.935	0.934	0.957	1.05167	0.909984	0.133597
B3H5K4	Alcohol dehydrogenase OS=Arabidopsis thaliana GN=At1g09490 PE=4 SV=1 - [B3H5K4_ARATH]	50.09	13.4	2	3	3	4	291	32.4	5.15	0.966	1.014	1.047	0.97	1.026	1.036	1.01067	1.009	1.00165	0.959987
O64743	FAD-binding and BBE domain-containing protein OS=Arabidopsis thaliana GN=MEE23 PE=1 SV=1 - [O64743_ARATH]	50.08	27.44	3	12	12	17	532	59.6	6.42	0.984	0.974	0.954	1.033	1.01	1.026	1.023	0.970667	1.05391	0.00932521
Q9ASV6	30S ribosomal protein S20, chloroplastic OS=Arabidopsis thaliana GN=RPS20 PE=2 SV=1 - [RR20_ARATH]	49.97	9.9	1	2	2	3	202	21.8	10.13	1.019	0.961	0.91	1.034	0.992	1.133	1.053	0.963333	1.09308	0.16178
Q9LXS6	Citrate synthase 2, peroxisomal OS=Arabidopsis thaliana GN=CSY2 PE=2 SV=1 - [CISY2_ARATH]	49.95	18.87	1	5	9	10	514	56.6	8.62	0.983	1.043	1.003	0.976	1.042	0.978	0.998667	1.00967	0.989105	0.713929
O81845	Mitochondrial uncoupling protein 1 OS=Arabidopsis thaliana GN=PUMP1 PE=1 SV=1 - [PUMP1_ARATH]	49.81	32.68	1	10	10	10	306	32.6	9.57	0.982	1.017	0.982	1.075	0.993	1.044	1.03733	0.993667	1.04394	0.176015
Q9FMA8	Germin-like protein subfamily 1 member 11 OS=Arabidopsis thaliana GN=At5g38940 PE=2 SV=1 - [GL111_ARATH]	49.8	7.17	1	1	1	2	223	23.6	8.47	0.844	0.95	0.828	1.139	1.204	1.124	1.15567	0.874	1.32227	0.00345474
O23461	L-arabinokinase OS=Arabidopsis thaliana GN=ARA1 PE=1 SV=1 - [ARAK_ARATH]	49.8	4.14	1	3	3	3	1039	114.2	6.3	1.042	1.194	0.954	0.927	1.13	0.935	0.997333	1.06333	0.937931	0.531726
Q8H788	Putative uncharacterized protein OS=Arabidopsis thaliana PE=2 SV=1 - [Q8H788_ARATH]	49.78	4.21	3	1	1	1	451	49.9	8.38	0.859	0.879	0.841	1.083	1.041	1.442	1.18867	0.859667	1.38271	0.0615878
Q93VA8	Alba DNA/RNA-binding protein OS=Arabidopsis thaliana GN=At1g76010 PE=2 SV=1 - [Q93VA8_ARATH]	49.62	30.86	3	7	7	10	350	37.4	9.77	0.822	0.953	0.863	1.066	1.137	1.214	1.139	0.879333	1.2953	0.0107856
Q8W455	Expressed protein OS=Arabidopsis thaliana GN=At2g36835 PE=2 SV=1 - [Q8W455_ARATH]	49.58	21.77	1	3	3	4	124	13.4	8.13	0.769	0.691	0.796	1.259	1.432	1.275	1.322	0.752	1.75798	0.000854462
Q9SFW1	Putative beta-1,3-glucanase OS=Arabidopsis thaliana GN=T1B9.1 PE=3 SV=1 - [Q9SFW1_ARATH]	49.57	7.27	3	2	2	5	440	48.5	8.69	1.127	0.911	0.928	0.975	1.046	1.036	1.019	0.988667	1.03068	0.698327
Q56YU0	Aldehyde dehydrogenase family 2 member C4 OS=Arabidopsis thaliana GN=ALDH2C4 PE=1 SV=2 - [AL2C4_ARATH]	49.56	27.54	2	12	12	14	501	54.3	5.69	1.033	1.042	1.023	0.976	0.954	0.869	0.933	1.03267	0.903486	0.0394462
Q9SKT0	Protein THYLAKOID FORMATION 1, chloroplastic OS=Arabidopsis thaliana GN=THF1 PE=1 SV=1 - [THF1_ARATH]	49.51	17.67	1	5	5	6	300	33.8	9.13	1.085	1.136	1.087	0.914	0.932	0.823	0.889667	1.10267	0.806832	0.00480308
O23657	Ras-related protein RABC1 OS=Arabidopsis thaliana GN=RABC1 PE=1 SV=1 - [RABC1_ARATH]	49.5	14.62	2	2	3	8	212	23.5	5.81	1.03	1.014	0.975	0.979	1.043	0.992	1.00467	1.00633	0.998344	0.950948
Q8W493	Ferredoxin--NADP reductase, leaf isozyme 2, chloroplastic OS=Arabidopsis thaliana GN=LFNR2 PE=1 SV=1 - [FNRL2_ARATH]	49.44	23.04	3	4	8	13	369	41.1	8.31	1.015	0.988	1.081	0.84	0.919	0.884	0.881	1.028	0.857004	0.0148501
Q94K13	Ribulose-phosphate 3-epimerase OS=Arabidopsis thaliana GN=F28J7.18 PE=2 SV=1 - [Q94K13_ARATH]	49.43	12	2	2	2	4	225	24	5.35	0.807	0.877	0.874	1.105	1.286	1.224	1.205	0.852667	1.41321	0.00366665
Q8L948	Putative uncharacterized protein At4g32930 OS=Arabidopsis thaliana GN=At4g32930 PE=2 SV=1 - [Q8L948_ARATH]	49.42	8.38	3	1	1	1	167	18.5	4.83	0.905	0.867	0.906	1.157	1.22	1.092	1.15633	0.892667	1.29537	0.00252495
Q9XGY4	Mitochondrial import inner membrane translocase subunit TIM8 OS=Arabidopsis thaliana GN=TIM8 PE=1 SV=1 - [TIM8_ARATH]	49.37	36.36	1	2	2	2	77	8.7	7.05	0.961	0.887	0.874	1.031	1.142	1.175	1.116	0.907333	1.22998	0.0152477
Q9SS99	F4P13.11 protein OS=Arabidopsis thaliana GN=F4P13.11 PE=4 SV=1 - [Q9SS99_ARATH]	49.33	2.84	2	1	1	1	493	53.5	6.52	1	0.954	0.827	1.007	1.044	1.26	1.10367	0.927	1.19058	0.134424
Q570X6	Signal peptidase I OS=Arabidopsis thaliana GN=At1g52600 PE=2 SV=1 - [Q570X6_ARATH]	49.28	16.11	2	3	3	5	180	20	7.12	1.043	1.101	1.023	0.937	0.956	0.943	0.945333	1.05567	0.895485	0.0101293
P52032	Phospholipid hydroperoxide glutathione peroxidase 1, chloroplastic OS=Arabidopsis thaliana GN=GPX1 PE=2 SV=2 - [GPX1_ARATH]	49.23	14.41	3	3	4	6	236	26	9.38	0.793	0.772	0.839	1.073	1.143	1.365	1.19367	0.801333	1.4896	0.0121674
Q8L7B2	Serine carboxypeptidase-like 20 OS=Arabidopsis thaliana GN=SCPL20 PE=2 SV=2 - [SCP20_ARATH]	49.2	6.24	1	3	3	5	497	55.8	6.25	0.807	0.645	0.693	1.309	1.326	1.249	1.29467	0.715	1.81072	0.000409243
Q8LCN8	Cytochrome P450-like protein OS=Arabidopsis thaliana PE=2 SV=1 - [Q8LCN8_ARATH]	49.16	2.43	3	1	1	1	494	55.8	8.65	0.903	1.098	0.883	1.089	1.173	0.963	1.075	0.961333	1.11824	0.283335
F4IFH2	Proline iminopeptidase OS=Arabidopsis thaliana GN=PIP PE=3 SV=1 - [F4IFH2_ARATH]	49.1	13.07	5	4	4	5	329	37.4	5.88	0.922	0.97	0.993	1.089	1.004	1.12	1.071	0.961667	1.11369	0.0540956
Q93ZN9	LL-diaminopimelate aminotransferase, chloroplastic OS=Arabidopsis thaliana GN=DAP PE=1 SV=1 - [DAPAT_ARATH]	49.07	11.28	1	4	4	6	461	50.4	7.34	1.12	1.041	1.117	0.884	0.886	0.944	0.904667	1.09267	0.827944	0.00442953
Q9LFT6	Alpha-hydroxynitrile lyase OS=Arabidopsis thaliana GN=HNL PE=1 SV=1 - [HNL_ARATH]	49.03	24.03	1	5	5	7	258	29.2	6.07	1.022	0.978	1.029	1.006	0.945	1.012	0.987667	1.00967	0.978211	0.45625
Q84WJ9	At5g19680 OS=Arabidopsis thaliana GN=At5g19680 PE=2 SV=1 - [Q84WJ9_ARATH]	48.89	4.57	2	1	1	1	328	37	4.81	NA	NA	NA	NA	NA	NA	NA	NA	NA	NA
Q9SR70	Peptidyl-prolyl cis-trans isomerase FKBP16-4, chloroplastic OS=Arabidopsis thaliana GN=FKBP16-4 PE=1 SV=1 - [FK164_ARATH]	48.89	9.57	1	2	2	2	230	24.5	9.63	1.101	1.015	1.038	0.952	1.013	0.89	0.951667	1.05133	0.9052	0.0853829
Q8L3W7	Small nuclear ribonucleoprotein-like protein OS=Arabidopsis thaliana PE=2 SV=1 - [Q8L3W7_ARATH]	48.88	35.24	4	4	4	5	105	12.2	9.83	1.042	0.95	1.104	1.05	0.947	0.963	0.986667	1.032	0.956072	0.456143
Q94C38	AT3g42050/F4M19_10 OS=Arabidopsis thaliana PE=2 SV=1 - [Q94C38_ARATH]	48.88	10.66	3	3	4	6	441	50.3	7.03	0.953	1.006	1.059	1.099	0.947	1.051	1.03233	1.006	1.02618	0.653082
Q9SIQ9	Vesicle-associated membrane protein 712 OS=Arabidopsis thaliana GN=VAMP712 PE=2 SV=1 - [VA712_ARATH]	48.86	13.7	7	2	3	8	219	24.9	8.18	1.075	1.015	0.949	0.941	0.727	1.017	0.895	1.013	0.883514	0.278283
Q9FJH6	ABC transporter F family member 1 OS=Arabidopsis thaliana GN=ABCF1 PE=1 SV=1 - [AB1F_ARATH]	48.86	5.04	1	3	3	4	595	66.8	6.46	1.005	0.988	1.078	1.007	0.992	0.919	0.972667	1.02367	0.950179	0.258395
Q9LMK7	Ran-binding protein 1 homolog a OS=Arabidopsis thaliana GN=RANBP1A PE=1 SV=1 - [RBP1A_ARATH]	48.85	19.3	2	4	4	4	228	25.6	4.94	1.03	0.96	0.975	1.055	1.058	1.028	1.047	0.988333	1.05936	0.0656481
Q9S7J7	At2g05070/F1O13.20 OS=Arabidopsis thaliana GN=LHCB2.2 PE=2 SV=1 - [Q9S7J7_ARATH]	48.83	11.32	11	1	3	5	265	28.6	5.43	1.121	1.189	1.199	0.851	0.822	0.764	0.812333	1.16967	0.6945	0.000543141
Q9C8S5	Chlorophyll A-B-binding protein 2, 5' partial; 1-750 (Fragment) OS=Arabidopsis thaliana GN=T1P2.1 PE=4 SV=1 - [Q9C8S5_ARATH]	48.83	11.24	12	1	3	5	249	26.5	5.43	1.193	1.317	1.202	0.659	0.862	0.656	0.725667	1.23733	0.586476	0.00292851
Q9SJ89	Ferredoxin-thioredoxin reductase catalytic chain, chloroplastic OS=Arabidopsis thaliana GN=FTRC PE=2 SV=1 - [FTRC_ARATH]	48.82	9.59	1	2	2	4	146	16.4	7.88	0.986	0.92	0.818	1.126	1.273	1.026	1.14167	0.908	1.25734	0.054536
Q39242	Thioredoxin reductase 2 OS=Arabidopsis thaliana GN=NTR2 PE=2 SV=2 - [TRXB2_ARATH]	48.8	12.27	1	1	3	5	383	40.6	6.7	0.942	0.794	0.816	1.13	1.182	1.277	1.19633	0.850667	1.40635	0.00539634
Q9SUT5	Protein SGT1 homolog B OS=Arabidopsis thaliana GN=SGT1B PE=1 SV=1 - [SGT1B_ARATH]	48.8	12.57	1	4	4	4	358	39.7	5.11	0.937	1.026	1.017	1.081	1.037	0.984	1.034	0.993333	1.04094	0.364979
Q8RWN5	Glycine-rich RNA-binding protein RZ1C OS=Arabidopsis thaliana GN=RZ1C PE=1 SV=1 - [RZ1C_ARATH]	48.76	22.26	2	8	8	14	310	33.5	9	0.781	0.751	0.789	1.249	1.374	1.306	1.30967	0.773667	1.6928	0.000145674
Q67YC1	Putative uncharacterized protein At5g63420 OS=Arabidopsis thaliana GN=At5g63420 PE=2 SV=1 - [Q67YC1_ARATH]	48.73	7.57	4	5	5	6	911	100.6	8	1.002	0.975	0.976	1.058	0.951	1.04	1.01633	0.984333	1.03251	0.402885
Q9LSE4	Protein COFACTOR ASSEMBLY OF COMPLEX C SUBUNIT B CCB1, chloroplastic OS=Arabidopsis thaliana GN=CCB1 PE=1 SV=1 - [CCB1_ARATH]	48.71	4.49	1	1	1	1	267	30.1	9.77	1.122	1.15	0.829	1.165	0.876	0.909	0.983333	1.03367	0.951306	0.732676
F4J8L7	Aha1 domain-containing protein OS=Arabidopsis thaliana GN=At3g12050 PE=1 SV=1 - [F4J8L7_ARATH]	48.69	15.89	8	5	6	8	321	35.8	5.71	1.017	1.02	1.036	0.986	0.941	1.003	0.976667	1.02433	0.953466	0.0700431
F4JPN3	Uncharacterized protein OS=Arabidopsis thaliana GN=At4g36210 PE=4 SV=1 - [F4JPN3_ARATH]	48.65	6.91	3	3	3	3	550	59.7	5.81	0.961	1.005	1.117	0.912	0.985	0.879	0.925333	1.02767	0.900422	0.141716
B9DHY0	AT4G19170 protein (Fragment) OS=Arabidopsis thaliana GN=At4g19170 PE=2 SV=1 - [B9DHY0_ARATH]	48.61	5.03	2	1	2	4	398	43.6	5.86	1.048	0.981	1.148	1.022	0.858	0.957	0.945667	1.059	0.892981	0.171045
Q9ZQQ0	Serine carboxypeptidase-like 26 OS=Arabidopsis thaliana GN=SCPL26 PE=2 SV=1 - [SCP26_ARATH]	48.61	6.42	1	2	2	3	452	51.5	6.92	0.921	0.808	1.071	1.152	1.049	1.166	1.12233	0.933333	1.2025	0.0892982
Q9FK81	Stress-response A/B barrel domain-containing protein At5g22580 OS=Arabidopsis thaliana GN=At5g22580 PE=1 SV=1 - [Y5258_ARATH]	48.59	18.02	1	2	2	3	111	12.3	5.73	0.821	0.915	0.753	1.245	1.413	1.16	1.27267	0.829667	1.53395	0.00729104
Q8RYE9	Haloacid dehalogenase-like hydrolase domain-containing protein At2g33255 OS=Arabidopsis thaliana GN=At2g33255 PE=1 SV=1 - [GPPL3_ARATH]	48.58	39.59	1	8	8	9	245	27.5	6.24	0.905	0.918	0.925	1.083	1.107	1.095	1.095	0.916	1.19541	3.89482e-05
A8MR27	Polypyrimidine tract-binding protein 3 OS=Arabidopsis thaliana GN=PTB3 PE=4 SV=1 - [A8MR27_ARATH]	48.57	4.88	2	2	2	2	430	48	6.73	0.877	0.946	0.851	1.163	1.091	1.199	1.151	0.891333	1.29132	0.00365172
B3H5L3	Eukaryotic translation initiation factor eIF2A-like protein OS=Arabidopsis thaliana GN=At1g73180 PE=1 SV=1 - [B3H5L3_ARATH]	48.48	4.13	3	2	2	3	484	53.5	8.31	1.07	1.121	1.077	0.883	0.956	0.879	0.906	1.08933	0.831701	0.00349074
O81127	Serine/arginine-rich splicing factor RSZ21 OS=Arabidopsis thaliana GN=RSZ21 PE=1 SV=1 - [RSZ21_ARATH]	48.43	21.39	1	2	3	4	187	21.5	11.33	0.947	0.923	0.829	1.06	1.242	1.1	1.134	0.899667	1.26047	0.0236989
Q9FNC9	Mitochondrial import receptor subunit TOM9-2 OS=Arabidopsis thaliana GN=TOM9-2 PE=1 SV=3 - [TOM92_ARATH]	48.42	21.21	1	2	2	5	99	10.4	9.82	1.017	1.033	1.044	1	1.017	0.966	0.994333	1.03133	0.964124	0.0940058
Q9SJ90	Putative uncharacterized protein At2g04690 OS=Arabidopsis thaliana GN=At2g04690 PE=4 SV=1 - [Q9SJ90_ARATH]	48.4	24.85	3	3	3	4	165	18.2	7.39	1.04	1.077	1.057	0.908	0.961	0.958	0.942333	1.058	0.890674	0.00464043
F4HYA5	2-oxoglutarate (2OG) and Fe(II)-dependent oxygenase superfamily protein OS=Arabidopsis thaliana GN=At1g35190 PE=3 SV=1 - [F4HYA5_ARATH]	48.37	15.36	3	5	5	7	306	35.1	5.76	1.104	1.16	1.175	0.837	0.89	0.805	0.844	1.14633	0.736261	0.000777063
O49597	High mobility group B protein 5 OS=Arabidopsis thaliana GN=HMGB5 PE=2 SV=1 - [HMGB5_ARATH]	48.37	28	1	3	3	5	125	14.2	9.38	0.86	0.832	0.858	1.118	1.274	1.15	1.18067	0.85	1.38902	0.0024044
Q0WSR1	Aminoacylase like protein (Fragment) OS=Arabidopsis thaliana GN=At1g44820 PE=2 SV=1 - [Q0WSR1_ARATH]	48.35	4.72	2	1	1	1	424	47.3	5.97	0.96	0.815	0.797	1.09	1.047	1.428	1.18833	0.857333	1.38608	0.0649683
Q8W575	COP9 signalosome complex subunit 3 OS=Arabidopsis thaliana GN=CSN3 PE=1 SV=2 - [CSN3_ARATH]	48.31	7.23	2	2	2	5	429	47.7	6.38	1.064	0.864	0.976	1.105	0.983	1.02	1.036	0.968	1.07025	0.375274
P59231	60S ribosomal protein L10a-3 OS=Arabidopsis thaliana GN=RPL10AC PE=1 SV=1 - [R10A3_ARATH]	48.24	30.41	1	1	7	14	217	24.5	9.82	0.927	0.936	1.086	1.005	0.978	1.139	1.04067	0.983	1.05866	0.466165
Q8W034	Heterogeneous nuclear ribonucleoprotein 1 OS=Arabidopsis thaliana GN=RNP1 PE=1 SV=1 - [RNP1_ARATH]	48.16	15.82	1	5	5	7	411	42.3	5.9	0.758	0.71	0.726	1.273	1.425	1.265	1.321	0.731333	1.80629	0.000397382
Q96283	Ras-related protein RABA2c OS=Arabidopsis thaliana GN=RABA2C PE=2 SV=4 - [RAA2C_ARATH]	48.11	16.13	17	1	3	5	217	23.8	6.23	0.931	0.925	1.007	1.106	0.959	1.168	1.07767	0.954333	1.12924	0.141066
Q96261	Probable dehydrin LEA OS=Arabidopsis thaliana GN=LEA PE=2 SV=1 - [DHLEA_ARATH]	48.01	44.32	15	3	4	14	185	19.3	6.9	0.734	0.666	0.701	1.338	1.607	1.221	1.38867	0.700333	1.98287	0.00403641
O65639	Cold shock protein 1 OS=Arabidopsis thaliana GN=CSP1 PE=1 SV=1 - [CSP1_ARATH]	47.99	13.38	1	3	3	4	299	30.1	7.84	0.859	0.936	0.891	1.141	1.207	1.063	1.137	0.895333	1.26992	0.00690201
Q8GZ26	RNA-binding protein BRN2 OS=Arabidopsis thaliana GN=BRN2 PE=2 SV=1 - [BRN2L_ARATH]	47.95	4.2	2	1	1	1	429	47.6	9	0.985	0.907	1.18	0.869	0.963	1.123	0.985	1.024	0.961914	0.740714
Q8LEF4	3-isopropylmalate dehydrogenase OS=Arabidopsis thaliana PE=2 SV=1 - [Q8LEF4_ARATH]	47.86	16.34	4	3	6	8	404	43.3	6.06	0.985	0.932	0.998	1.144	1.009	1.104	1.08567	0.971667	1.11732	0.0638026
Q9M0Z6	Peptide methionine sulfoxide reductase B3 OS=Arabidopsis thaliana GN=MSRB3 PE=2 SV=2 - [MSRB3_ARATH]	47.85	19.89	2	2	3	8	176	18.8	6.29	1.113	0.767	0.803	1.09	1.207	1.105	1.134	0.894333	1.26798	0.107301
Q9C4Z6	Receptor for activated C kinase 1B OS=Arabidopsis thaliana GN=RACK1B PE=1 SV=1 - [GPLPB_ARATH]	47.81	24.23	2	3	9	14	326	35.8	7.11	0.982	0.944	1.054	1.071	0.987	0.989	1.01567	0.993333	1.02248	0.627023
O64700	Urease accessory protein G OS=Arabidopsis thaliana GN=UREG PE=2 SV=1 - [UREG_ARATH]	47.72	5.09	2	1	1	1	275	30.1	6.52	1.026	1.015	1.076	1.092	0.957	0.883	0.977333	1.039	0.940648	0.389828
F4JUG5	Pre-mRNA-processing-splicing factor OS=Arabidopsis thaliana GN=At4g38780 PE=4 SV=1 - [F4JUG5_ARATH]	47.71	3	3	6	6	9	2332	271.3	8.79	0.918	1.072	0.922	1.079	1.145	1.083	1.10233	0.970667	1.13565	0.0748433
P93014	30S ribosomal protein S5, chloroplastic OS=Arabidopsis thaliana GN=rps5 PE=2 SV=1 - [RR5_ARATH]	47.7	13.53	3	4	4	6	303	32.6	8.97	1.056	1.075	1.03	0.876	0.887	0.92	0.894333	1.05367	0.848782	0.00101377
Q8L608	Heparanase-like protein 2 OS=Arabidopsis thaliana GN=At5g61250 PE=2 SV=1 - [HPSE2_ARATH]	47.61	3.15	1	1	1	1	539	59.8	8.03	1.145	1.2	1.127	0.81	0.844	0.82	0.824667	1.15733	0.712558	0.000161306
Q8RXF7	Putative uncharacterized protein At5g61820 OS=Arabidopsis thaliana GN=At5g61820 PE=2 SV=1 - [Q8RXF7_ARATH]	47.6	6.74	3	2	2	3	475	53.1	6.43	0.822	0.545	0.634	1.317	1.472	1.491	1.42667	0.667	2.13893	0.00152161
B5TM92	NADH-ubiquinone oxidoreductase chain 1 OS=Arabidopsis thaliana PE=2 SV=1 - [B5TM92_ARATH]	47.53	5.85	2	1	1	1	325	36	8.1	0.969	1.275	1.037	0.962	0.924	0.85	0.912	1.09367	0.833892	0.138667
Q9LHP2	Serine/arginine-rich SC35-like splicing factor SCL30A OS=Arabidopsis thaliana GN=SCL30A PE=1 SV=1 - [SL30A_ARATH]	47.52	6.49	1	1	1	2	262	30.2	11.68	0.945	0.909	1.037	1.002	1.041	1.132	1.05833	0.963667	1.09824	0.155535
F4KF14	Probable inactive ATP-dependent zinc metalloprotease FTSHI 4, chloroplastic OS=Arabidopsis thaliana GN=FTSHI4 PE=1 SV=1 - [FTSI4_ARATH]	47.42	5.03	1	3	3	3	855	96.8	5.83	1.105	0.945	1.05	0.987	0.863	1.012	0.954	1.03333	0.923226	0.294167
Q9FL61	At5g24130 OS=Arabidopsis thaliana GN=At5g24130 PE=2 SV=1 - [Q9FL61_ARATH]	47.35	11.71	1	3	3	7	316	34.7	8.56	0.992	0.977	0.91	1.027	1.075	1.083	1.06167	0.959667	1.10629	0.0292496
C0Z224	Aminoacylase-1 OS=Arabidopsis thaliana GN=At4g38220 PE=2 SV=1 - [C0Z224_ARATH]	47.32	24.75	5	8	8	10	400	44.3	6.42	0.968	0.977	1.013	1.006	0.989	1.014	1.003	0.986	1.01724	0.337055
Q9M7X9	Thioredoxin-like protein CITRX, chloroplastic OS=Arabidopsis thaliana GN=CITRX PE=1 SV=1 - [CITRX_ARATH]	47.27	13.66	1	2	2	3	183	20.7	5.94	1.297	1.034	1.065	0.825	0.891	0.854	0.856667	1.132	0.756773	0.0318733
Q9M0F5	Acid phosphatase-like protein OS=Arabidopsis thaliana GN=At4g29260 PE=2 SV=1 - [Q9M0F5_ARATH]	47.24	16.86	1	3	3	3	255	28.9	4.98	0.978	0.912	1.062	1.096	1.023	0.918	1.01233	0.984	1.02879	0.696123
Q9ASV9	At1g53210/F12M16_12 OS=Arabidopsis thaliana PE=2 SV=1 - [Q9ASV9_ARATH]	47.22	4.26	3	2	2	3	493	53.6	5.36	0.974	0.975	0.992	0.951	0.953	1.068	0.990667	0.980333	1.01054	0.804669
Q9LHQ5	Probable histone H2A.2 OS=Arabidopsis thaliana GN=At3g20670 PE=1 SV=1 - [H2A2_ARATH]	47.21	18.18	1	1	3	9	132	13.8	10.15	1.05	1.145	1.217	0.887	0.792	0.871	0.85	1.13733	0.747362	0.00708814
Q8LAJ6	Putative uncharacterized protein OS=Arabidopsis thaliana PE=2 SV=1 - [Q8LAJ6_ARATH]	47.16	25.63	2	4	4	5	199	21.5	8.46	1.057	1.055	1.121	0.897	0.899	0.842	0.879333	1.07767	0.81596	0.0022735
Q8S9J9	At1g14000/F7A19_9 OS=Arabidopsis thaliana PE=2 SV=1 - [Q8S9J9_ARATH]	47.1	9.59	3	3	3	3	438	49.3	7.94	1.075	1.053	1.069	0.973	0.994	0.942	0.969667	1.06567	0.909916	0.00431495
Q9C5Z2	Eukaryotic translation initiation factor 3 subunit H OS=Arabidopsis thaliana GN=TIF3H1 PE=1 SV=2 - [EIF3H_ARATH]	47.07	10.98	1	4	4	5	337	38.3	4.92	1.054	1.056	1.006	0.891	0.946	0.945	0.927333	1.03867	0.892811	0.0103724
Q93V62	AT4g27450/F27G19_50 OS=Arabidopsis thaliana GN=At4g27450 PE=1 SV=1 - [Q93V62_ARATH]	47.06	24.8	2	4	4	11	250	27.6	5.86	0.94	0.886	1.04	1.028	1.088	1.128	1.08133	0.955333	1.13189	0.0786826
O23240	D-2-hydroxyglutarate dehydrogenase, mitochondrial OS=Arabidopsis thaliana GN=D2HGDH PE=1 SV=3 - [D2HDH_ARATH]	47.04	3.94	1	2	2	3	559	61.4	6.98	0.924	1.019	0.996	1.141	0.909	1.139	1.063	0.979667	1.08506	0.367745
Q8LEB8	Quinone oxidoreductase-like protein OS=Arabidopsis thaliana PE=2 SV=1 - [Q8LEB8_ARATH]	47.03	21.36	2	4	4	4	309	32.7	6.16	0.896	0.983	0.889	1.194	0.933	1.037	1.05467	0.922667	1.14306	0.181315
Q9SEU6	Thioredoxin M4, chloroplastic OS=Arabidopsis thaliana GN=At3g15360 PE=2 SV=2 - [TRXM4_ARATH]	46.99	16.58	1	3	3	4	193	21.2	9.57	0.871	0.75	0.808	1.26	1.29	1.194	1.248	0.809667	1.54138	0.00062198
Q9MA63	REF/SRPP-like protein At3g05500 OS=Arabidopsis thaliana GN=At3g05500 PE=1 SV=1 - [Y3550_ARATH]	46.97	29.27	1	6	6	6	246	27.2	8.27	0.887	0.878	0.931	1.117	1.088	1.11	1.105	0.898667	1.2296	0.000372429
Q93VP9	Putative uncharacterized protein At4g27585 OS=Arabidopsis thaliana GN=At4g27585 PE=1 SV=1 - [Q93VP9_ARATH]	46.9	15.09	4	6	6	8	411	45	6.81	0.987	1.006	0.969	0.98	1.039	0.957	0.992	0.987333	1.00473	0.86952
Q8L5Z7	Sorting nexin 2A OS=Arabidopsis thaliana GN=SNX2A PE=1 SV=1 - [SNX2A_ARATH]	46.9	7.5	2	3	3	3	587	65.5	5.29	1.009	0.948	1.091	1.02	0.936	1.008	0.988	1.016	0.972441	0.598529
Q9LUV2	Stress-response A/B barrel domain-containing protein HS1 OS=Arabidopsis thaliana GN=HS1 PE=1 SV=1 - [POP3_ARATH]	46.74	43.12	1	4	4	8	109	12.2	5.68	1.042	1.033	0.943	0.893	1.039	0.912	0.948	1.006	0.942346	0.356319
P0C5B6	4-coumarate--CoA ligase-like 4 OS=Arabidopsis thaliana GN=4CLL4 PE=2 SV=1 - [4CLL4_ARATH]	46.72	2.91	1	1	1	1	550	60.5	8.27	1.067	1.12	1.009	1.037	0.857	0.932	0.942	1.06533	0.88423	0.114359
Q9SU56	L-galactono-1,4-lactone dehydrogenase, mitochondrial OS=Arabidopsis thaliana GN=GLDH PE=1 SV=1 - [GLDH_ARATH]	46.71	6.72	1	4	4	5	610	68.5	8.56	1.047	1.025	1.056	0.948	0.966	0.908	0.940667	1.04267	0.902174	0.00632962
Q9SEY5	Probable acyl-activating enzyme 2 OS=Arabidopsis thaliana GN=AAE2 PE=2 SV=1 - [AAE2_ARATH]	46.64	7.79	1	3	3	4	603	67.4	7.21	1.108	0.999	1.039	0.91	0.978	0.988	0.958667	1.04867	0.914177	0.0885927
Q8L7T1	At2g41260/F13H10.19 OS=Arabidopsis thaliana GN=M17 PE=2 SV=1 - [Q8L7T1_ARATH]	46.59	12.44	2	1	1	1	225	23.9	6.32	0.888	0.725	0.726	1.308	1.161	1.402	1.29033	0.779667	1.65498	0.00449857
F4JUM3	Sec23/sec24-like transport protein OS=Arabidopsis thaliana GN=At4g14160 PE=4 SV=1 - [F4JUM3_ARATH]	46.58	13.06	10	6	6	6	620	68.6	6.3	1	1.022	0.978	1.001	1.026	1.043	1.02333	1	1.02333	0.255791
A0A097PKS4	RabGAP/TBC domain-containing protein (Fragment) OS=Arabidopsis thaliana PE=2 SV=1 - [A0A097PKS4_ARATH]	46.56	5.43	5	3	3	3	626	72.4	6.04	1.057	0.9	1.008	0.997	1.011	1.072	1.02667	0.988333	1.03879	0.500189
F4HR88	Leucine-rich repeat (LRR) family protein OS=Arabidopsis thaliana GN=At1g33590 PE=4 SV=1 - [F4HR88_ARATH]	46.54	14.88	7	6	6	6	477	51.7	8.91	1.083	0.983	1.017	1.01	0.979	0.979	0.989333	1.02767	0.962699	0.285511
Q8L7R2	Homoserine kinase OS=Arabidopsis thaliana GN=HSK PE=1 SV=1 - [KHSE_ARATH]	46.52	13.51	2	5	5	6	370	38.5	8.29	0.97	1.082	1.046	1.056	0.954	0.909	0.973	1.03267	0.942221	0.335857
Q9T070	Cytochrome c oxidase subunit 6a, mitochondrial OS=Arabidopsis thaliana GN=COX6A PE=2 SV=1 - [COX6A_ARATH]	46.38	14.71	1	2	2	4	102	11.2	9.09	1.088	1.016	1.057	0.835	0.941	0.828	0.868	1.05367	0.82379	0.0115848
Q8L745	AT5g42220/K5J14_2 OS=Arabidopsis thaliana GN=At5g42220 PE=2 SV=1 - [Q8L745_ARATH]	46.37	2.28	2	1	1	1	879	92.5	5.22	1.12	0.794	1.007	0.866	1.039	1.21	1.03833	0.973667	1.06642	0.663361
F4HS76	Glycerol kinase-like protein OS=Arabidopsis thaliana GN=NHO1 PE=4 SV=1 - [F4HS76_ARATH]	46.34	6.85	3	3	3	3	482	52.4	6.55	0.954	0.913	1.019	0.983	0.933	0.832	0.916	0.962	0.952183	0.442918
O49570	At4g31200 OS=Arabidopsis thaliana GN=At4g31200 PE=2 SV=1 - [O49570_ARATH]	46.33	5.54	1	2	2	2	650	72.5	6.73	0.744	0.822	0.792	1.388	1.219	1.236	1.281	0.786	1.62977	0.00105709
Q8LA37	GrpE protein homolog OS=Arabidopsis thaliana PE=2 SV=1 - [Q8LA37_ARATH]	46.3	3.94	2	1	1	1	279	31.2	9.41	1.088	1.064	1.242	0.918	0.94	0.727	0.861667	1.13133	0.761638	0.0370628
Q8RXQ4	Putative uncharacterized protein At1g71840 OS=Arabidopsis thaliana GN=At1g71840 PE=2 SV=1 - [Q8RXQ4_ARATH]	46.23	4.18	1	1	1	1	407	43.8	4.53	1.084	0.99	0.986	0.946	0.966	1.062	0.991333	1.02	0.971895	0.582766
Q9SQT8	Bifunctional 3-dehydroquinate dehydratase/shikimate dehydrogenase, chloroplastic OS=Arabidopsis thaliana GN=EMB3004 PE=1 SV=1 - [DHQSD_ARATH]	46.21	8.79	1	5	5	5	603	65.8	6.87	0.99	0.995	0.999	0.986	0.957	1.152	1.03167	0.994667	1.0372	0.575697
P82873	Mitochondrial import receptor subunit TOM20-2 OS=Arabidopsis thaliana GN=TOM20-2 PE=1 SV=2 - [TO202_ARATH]	46.17	22.38	1	4	4	6	210	23.2	5.81	1.127	1.024	1.091	0.96	0.886	0.93	0.925333	1.08067	0.856262	0.0137759
Q9SMQ9	DnaJ-like protein OS=Arabidopsis thaliana GN=T5J17.130 PE=3 SV=1 - [Q9SMQ9_ARATH]	46.15	8.59	2	2	2	2	396	42.4	9.03	1.122	0.961	0.83	0.909	0.965	1.158	1.01067	0.971	1.04085	0.743744
Q9LP53	Alba DNA/RNA-binding protein OS=Arabidopsis thaliana GN=F28N24.7 PE=1 SV=1 - [Q9LP53_ARATH]	46.12	10.77	2	1	2	6	130	14.6	5.36	1.005	1.162	1.077	0.86	0.999	0.883	0.914	1.08133	0.845253	0.0554383
Q9SU27	At4g12590 OS=Arabidopsis thaliana GN=At4g12590 PE=2 SV=1 - [Q9SU27_ARATH]	45.92	13.01	1	2	2	2	246	27.9	9.48	1.034	0.848	1.047	0.95	1.053	1.106	1.03633	0.976333	1.06145	0.48946
Q9SJA7	Probable sarcosine oxidase OS=Arabidopsis thaliana GN=At2g24580 PE=2 SV=1 - [SOX_ARATH]	45.92	20.67	1	6	6	12	416	45.7	6.02	1.079	1.009	0.994	0.97	0.944	0.989	0.967667	1.02733	0.941921	0.111057
Q9ZVH7	Protein FATTY ACID EXPORT 3, chloroplastic OS=Arabidopsis thaliana GN=FAX3 PE=2 SV=2 - [FAX3_ARATH]	45.91	5.97	1	2	2	3	335	36.7	7.53	1.046	1.144	1.054	0.935	1.015	0.844	0.931333	1.08133	0.861282	0.0624896
Q9SF78	GDSL esterase/lipase At1g71691 OS=Arabidopsis thaliana GN=At1g71691 PE=2 SV=1 - [GDL29_ARATH]	45.9	21.35	1	7	7	8	384	41.7	5.63	0.907	0.873	0.907	1.172	1.116	1.193	1.16033	0.895667	1.2955	0.000495719
Q9SMU7	Signal recognition particle 9 kDa protein OS=Arabidopsis thaliana GN=SRP9 PE=3 SV=1 - [SRP09_ARATH]	45.9	11.65	1	1	1	2	103	12	9.03	1.031	1.039	1.077	1.031	0.926	0.926	0.961	1.049	0.916111	0.0802444
F4HUG9	Ribonuclease T2 family protein OS=Arabidopsis thaliana GN=At1g14210 PE=3 SV=1 - [F4HUG9_ARATH]	45.89	10.53	3	2	2	2	247	28.2	6.28	1.04	1.105	1.02	0.93	0.899	1.012	0.947	1.055	0.89763	0.0633481
Q41967	Mitochondrial fusion target protein (Fragment) OS=Arabidopsis thaliana PE=2 SV=1 - [Q41967_ARATH]	45.88	30	1	1	4	12	70	7.6	10.86	0.774	0.667	0.74	1.179	1.735	1.166	1.36	0.727	1.8707	0.0291462
B9DHG4	AT4G27690 protein OS=Arabidopsis thaliana GN=At4g27690 PE=2 SV=1 - [B9DHG4_ARATH]	45.88	20	4	4	4	4	275	32.1	6.57	1.169	0.938	0.997	1.042	1.023	0.956	1.007	1.03467	0.97326	0.727607
Q9M2U2	Very-long-chain enoyl-CoA reductase OS=Arabidopsis thaliana GN=ECR PE=1 SV=1 - [TECR_ARATH]	45.83	9.03	1	2	2	4	310	35.7	9.44	1.079	0.956	0.913	1.012	1.063	1.083	1.05267	0.982667	1.07123	0.264944
Q8LFC0	Isocitrate dehydrogenase [NAD] regulatory subunit 1, mitochondrial OS=Arabidopsis thaliana GN=IDH1 PE=2 SV=2 - [IDH1_ARATH]	45.77	14.99	4	5	5	6	367	39.6	8.13	1.087	1.079	0.976	0.955	0.974	0.911	0.946667	1.04733	0.903883	0.0669949
Q9SKX4	50S ribosomal protein L3-1, chloroplastic OS=Arabidopsis thaliana GN=RPL3A PE=2 SV=1 - [RK3A_ARATH]	45.72	13.65	1	4	4	7	271	29.3	10.43	1.094	1.175	1.129	0.882	0.859	0.811	0.850667	1.13267	0.75103	0.000853399
Q38879	Thioredoxin H2 OS=Arabidopsis thaliana GN=TRX2 PE=2 SV=2 - [TRXH2_ARATH]	45.69	18.8	2	2	2	3	133	14.7	6.01	1.051	1.055	1.062	0.822	1.124	0.927	0.957667	1.056	0.906881	0.329172
Q8VXZ9	Polyadenylate-binding protein RBP47B' OS=Arabidopsis thaliana GN=RBP47B' PE=2 SV=1 - [R47BP_ARATH]	45.62	2.82	1	1	1	1	425	46.6	5.69	1.128	1.049	1.027	0.906	1.063	0.835	0.934667	1.068	0.875156	0.145982
Q9S6Z7	Bifunctional L-3-cyanoalanine synthase/cysteine synthase D1 OS=Arabidopsis thaliana GN=CYSD1 PE=1 SV=1 - [CYSD1_ARATH]	45.57	21.3	4	2	5	10	324	34.3	5.34	1.07	0.921	0.922	1.09	0.914	1.139	1.04767	0.971	1.07896	0.414874
Q9M8T0	Probable inactive receptor kinase At3g02880 OS=Arabidopsis thaliana GN=At3g02880 PE=1 SV=1 - [Y3288_ARATH]	45.48	3.03	1	1	1	1	627	67.7	8.37	1.185	1.115	0.863	0.803	0.731	1.28	0.938	1.05433	0.889662	0.58854
Q8VYF7	Single-stranded DNA-binding protein WHY2, mitochondrial OS=Arabidopsis thaliana GN=WHY2 PE=1 SV=1 - [WHY2_ARATH]	45.47	17.23	2	3	3	3	238	26.3	9.64	0.791	0.765	0.789	1.165	1.484	1.196	1.28167	0.781667	1.63966	0.00800625
Q9SA78	Coatomer subunit epsilon-1 OS=Arabidopsis thaliana GN=At1g30630 PE=2 SV=1 - [COPE1_ARATH]	45.4	17.12	1	4	4	6	292	32.6	5.57	0.971	1.095	0.905	0.987	0.974	0.971	0.977333	0.990333	0.986873	0.827548
Q9FZG9	Putative pectinesterase OS=Arabidopsis thaliana GN=F5A13.5 PE=4 SV=1 - [Q9FZG9_ARATH]	45.33	18.67	6	4	8	12	541	60.4	9.45	0.913	0.959	0.994	0.953	1.052	1.072	1.02567	0.955333	1.07362	0.182245
Q9T0I8	5'-methylthioadenosine/S-adenosylhomocysteine nucleosidase 1 OS=Arabidopsis thaliana GN=MTN1 PE=1 SV=1 - [MTN1_ARATH]	45.3	5.62	1	1	1	1	267	28.4	4.84	0.937	1.112	0.871	1.075	1.106	0.995	1.05867	0.973333	1.08767	0.341617
A8MS48	Uncharacterized protein OS=Arabidopsis thaliana GN=At5g16660 PE=4 SV=1 - [A8MS48_ARATH]	45.27	15.66	4	2	2	6	166	17.8	7.96	0.984	1.002	0.941	0.959	1.076	0.92	0.985	0.975667	1.00957	0.861672
Q8H104	Aspartate--tRNA ligase 1, cytoplasmic OS=Arabidopsis thaliana GN=At4g26870 PE=2 SV=1 - [SYDC1_ARATH]	45.26	10.34	1	4	6	6	532	60.3	6.62	1.034	0.978	1.069	1.03	0.948	1.042	1.00667	1.027	0.980201	0.635375
Q8L932	Putative uncharacterized protein OS=Arabidopsis thaliana PE=2 SV=1 - [Q8L932_ARATH]	45.23	13.81	2	3	4	5	333	38.1	6.89	1.008	0.941	0.942	0.946	0.996	1.103	1.015	0.963667	1.05327	0.373955
Q8L953	40S ribosomal protein S27-3 OS=Arabidopsis thaliana GN=RPS27D PE=2 SV=2 - [RS273_ARATH]	45.22	45.24	1	2	3	7	84	9.5	8.95	1.005	1	1.043	1.032	0.979	0.931	0.980667	1.016	0.965223	0.333772
Q9ZRA2	Homogentisate 1,2-dioxygenase OS=Arabidopsis thaliana GN=HGO PE=2 SV=2 - [HGD_ARATH]	45.21	18	1	6	6	8	461	51.4	6.18	1.031	1.03	1.034	0.965	0.989	0.993	0.982333	1.03167	0.952181	0.00502493
Q9SZ83	Uncharacterized oxidoreductase At4g09670 OS=Arabidopsis thaliana GN=At4g09670 PE=1 SV=1 - [Y4967_ARATH]	45.18	26.24	1	8	8	9	362	39.5	5.88	1.056	1.07	1.084	0.916	0.923	0.867	0.902	1.07	0.842991	0.000974839
Q9SK86	Alcohol dehydrogenase-like 1 OS=Arabidopsis thaliana GN=At1g22430 PE=2 SV=1 - [ADHL1_ARATH]	45.16	23.45	2	8	8	11	388	42.5	6.54	0.948	1.01	1.041	0.976	1.012	1.002	0.996667	0.999667	0.996999	0.923555
Q8LKS5	Long chain acyl-CoA synthetase 7, peroxisomal OS=Arabidopsis thaliana GN=LACS7 PE=1 SV=2 - [LACS7_ARATH]	45.05	5.29	1	2	3	3	700	77.3	6.6	1.069	0.965	1.129	0.959	0.968	0.914	0.947	1.05433	0.898198	0.101853
Q9FUS8	Glutathione S-transferase U17 OS=Arabidopsis thaliana GN=GSTU17 PE=2 SV=1 - [GSTUH_ARATH]	45	18.06	6	2	4	5	227	25.3	6.6	1.048	1.124	1.155	0.831	0.948	0.899	0.892667	1.109	0.804929	0.00963582
Q38862	Inositol-3-phosphate synthase isozyme 2 OS=Arabidopsis thaliana GN=IPS2 PE=1 SV=2 - [INO2_ARATH]	44.95	12.94	4	2	7	9	510	56.3	5.49	1.114	1.115	1.121	0.87	0.898	0.852	0.873333	1.11667	0.78209	5.66914e-05
C4PW06	Inositol-3-phosphate synthase OS=Arabidopsis thaliana GN=At4g39800 PE=4 SV=1 - [C4PW06_ARATH]	44.95	13.5	7	2	7	10	511	56.5	5.66	0.941	0.981	0.99	1.057	1.025	1.085	1.05567	0.970667	1.08757	0.0208012
Q9LDK9	Beta-adaptin-like protein A OS=Arabidopsis thaliana GN=BETAA-AD PE=1 SV=1 - [APBLA_ARATH]	44.87	1.78	2	1	1	1	841	93.2	5.44	1.148	0.931	0.94	1.044	1.071	0.916	1.01033	1.00633	1.00397	0.964927
Q8S9M1	Probable plastid-lipid-associated protein 13, chloroplastic OS=Arabidopsis thaliana GN=PAP13 PE=1 SV=2 - [PAP13_ARATH]	44.86	27.42	3	6	6	7	299	33	6.3	1.002	0.952	0.957	0.941	0.956	1.096	0.997667	0.970333	1.02817	0.625994
Q9LV03	Glutamate synthase 1 [NADH], chloroplastic OS=Arabidopsis thaliana GN=GLT1 PE=2 SV=2 - [GLUT1_ARATH]	44.85	1.68	1	3	3	3	2208	241.7	6.37	1.152	1.081	1.106	0.92	0.796	0.848	0.854667	1.113	0.767895	0.00340049
Q9LYR3	Cytochrome b-c1 complex subunit Rieske, mitochondrial OS=Arabidopsis thaliana GN=T22N19_80 PE=4 SV=1 - [Q9LYR3_ARATH]	44.85	17.08	8	3	3	5	240	26.2	7.46	0.978	1.188	1.031	0.866	0.882	0.928	0.892	1.06567	0.837035	0.0574591
Q9T090	26S proteasome regulatory particle chain RPT6-like protein OS=Arabidopsis thaliana GN=At4g27680 PE=2 SV=1 - [Q9T090_ARATH]	44.8	7.79	3	1	2	5	398	44.2	6.16	1.053	0.953	1.142	1.099	0.858	0.93	0.962333	1.04933	0.91709	0.387962
Q9FHW7	SKP1-like protein 1B OS=Arabidopsis thaliana GN=SKP1B PE=1 SV=1 - [SKP1B_ARATH]	44.75	16.37	4	1	2	2	171	19.1	4.61	0.938	0.797	0.859	1.125	1.271	1.161	1.18567	0.864667	1.37124	0.00586577
Q9FKZ4	Putative uncharacterized protein At5g66860; MUD21.12 OS=Arabidopsis thaliana GN=At5g66860 PE=2 SV=1 - [Q9FKZ4_ARATH]	44.71	6.83	1	1	1	1	249	27.3	9.33	0.758	0.693	0.902	1.258	1.268	1.339	1.28833	0.784333	1.64258	0.00165407
Q9LZD3	Exocyst complex component EXO70A1 OS=Arabidopsis thaliana GN=EXO70A1 PE=1 SV=1 - [E70A1_ARATH]	44.69	2.04	2	1	1	1	638	72.3	8.16	0.974	1.063	1	1.033	0.992	0.999	1.008	1.01233	0.995719	0.889578
Q0V856	At1g29320 OS=Arabidopsis thaliana GN=At1g29320 PE=2 SV=1 - [Q0V856_ARATH]	44.57	2.35	1	1	1	1	468	52.2	7.65	1.24	1.052	1.168	0.823	0.893	0.764	0.826667	1.15333	0.716763	0.00786875
F4JML5	Probable enoyl-CoA hydratase 2, mitochondrial OS=Arabidopsis thaliana GN=At4g16800 PE=2 SV=1 - [ECH2M_ARATH]	44.49	13.62	1	4	4	6	301	32.8	7.97	1.142	1.079	1.104	0.883	0.869	0.95	0.900667	1.10833	0.812632	0.00257966
Q9LIG0	Clavaminate synthase-like protein At3g21360 OS=Arabidopsis thaliana GN=At3g21360 PE=1 SV=1 - [Y3136_ARATH]	44.45	11.82	1	3	3	3	330	37.2	6.06	1.059	0.844	0.983	1.004	1.155	1.015	1.058	0.962	1.09979	0.293884
Q6NPF9	Thioredoxin Y1, chloroplastic OS=Arabidopsis thaliana GN=At1g76760 PE=2 SV=1 - [TRXY1_ARATH]	44.42	7.56	1	2	2	5	172	19.2	8.85	0.672	0.636	0.816	1.339	1.532	1.159	1.34333	0.708	1.89736	0.00628025
Q8L3X8	Serine/arginine-rich SC35-like splicing factor SCL30 OS=Arabidopsis thaliana GN=SCL30 PE=1 SV=1 - [SRC30_ARATH]	44.41	13.74	1	2	2	3	262	29.5	11.27	1.109	0.891	0.852	1.012	0.994	1.024	1.01	0.950667	1.06241	0.501666
Q9SUX8	Putative uncharacterized protein AT4g22410 OS=Arabidopsis thaliana GN=At4g22410 PE=4 SV=1 - [Q9SUX8_ARATH]	44.4	3.82	6	1	1	1	340	39.7	9.06	1.16	1.108	1.073	1.047	0.9	0.708	0.885	1.11367	0.794672	0.0870444
F4JCD4	Uncharacterized protein OS=Arabidopsis thaliana GN=At3g19780 PE=4 SV=1 - [F4JCD4_ARATH]	44.32	0.66	2	1	1	1	1058	118.9	5.87	0.745	1.832	2.14	0.358	0.38	0.273	0.337	1.57233	0.214331	0.0436352
Q8S528	Aldehyde dehydrogenase family 2 member B7, mitochondrial OS=Arabidopsis thaliana GN=ALDH2B7 PE=2 SV=2 - [AL2B7_ARATH]	44.25	8.61	3	2	5	5	534	58.1	7.33	0.885	0.972	0.991	1.129	1.044	0.982	1.05167	0.949333	1.10779	0.129222
F4HPE1	Putative methyltransferase PMT2 OS=Arabidopsis thaliana GN=At1g26850 PE=4 SV=1 - [F4HPE1_ARATH]	44.23	3.95	2	1	1	1	506	56.8	7.3	0.896	0.982	1.02	1.002	0.941	1.239	1.06067	0.966	1.098	0.3888
Q39211	DNA-directed RNA polymerases II, IV and V subunit 3 OS=Arabidopsis thaliana GN=NRPB3 PE=1 SV=1 - [NRPB3_ARATH]	44.22	4.08	3	1	1	1	319	35.4	4.79	NA	NA	NA	NA	NA	NA	NA	NA	NA	NA
Q9FJI5	Glucose-6-phosphate 1-dehydrogenase, cytoplasmic isoform 2 OS=Arabidopsis thaliana GN=ACG12 PE=2 SV=1 - [G6PD6_ARATH]	44.21	10.68	5	3	6	8	515	59.1	6.43	0.967	0.98	1.092	1.243	0.998	0.857	1.03267	1.013	1.01941	0.877307
F4K4E3	Sm-like protein LSM4 OS=Arabidopsis thaliana GN=LSM4 PE=1 SV=1 - [LSM4_ARATH]	44.12	14.73	1	2	2	3	129	14.3	9.92	0.789	0.797	0.827	1.34	1.282	1.239	1.287	0.804333	1.60008	0.000105372
Q42479	Calcium-dependent protein kinase 3 OS=Arabidopsis thaliana GN=CPK3 PE=1 SV=1 - [CDPK3_ARATH]	44.05	8.13	3	4	4	4	529	59.3	6.37	0.968	1.007	1.051	0.971	0.989	1.015	0.991667	1.00867	0.983146	0.565365
Q9LD90	H/ACA ribonucleoprotein complex subunit 4 OS=Arabidopsis thaliana GN=CBF5 PE=1 SV=1 - [CBF5_ARATH]	44	1.59	1	1	1	1	565	63	9.14	0.865	0.802	0.859	1.139	1.164	1.336	1.213	0.842	1.44062	0.00468359
C0Z3C3	AT1G75330 protein OS=Arabidopsis thaliana GN=At1g75330 PE=2 SV=1 - [C0Z3C3_ARATH]	43.99	11.27	2	4	4	4	346	38	6.9	1.049	1.118	0.995	1.054	0.882	0.852	0.929333	1.054	0.88172	0.15975
F4JLS3	2-oxoglutarate (2OG) and Fe(II)-dependent oxygenase superfamily protein OS=Arabidopsis thaliana GN=At4g16330 PE=3 SV=1 - [F4JLS3_ARATH]	43.95	5.81	3	1	1	1	258	28.9	5.6	1.049	0.98	1.053	1.143	0.884	0.944	0.990333	1.02733	0.963984	0.674414
Q9SX52	Phytochrome-associated serine/threonine-protein phosphatase 1 OS=Arabidopsis thaliana GN=FYPP1 PE=2 SV=1 - [FYPP1_ARATH]	43.95	23.1	2	6	6	8	303	34.8	5.07	0.974	0.982	1.002	1.053	0.939	1.101	1.031	0.986	1.04564	0.408277
B9DH83	Calcium-transporting ATPase OS=Arabidopsis thaliana GN=At5g57110 PE=2 SV=1 - [B9DH83_ARATH]	43.92	7.73	3	8	8	9	1074	116.1	7.94	1.083	0.982	1.031	0.995	0.905	1.005	0.968333	1.032	0.938307	0.214069
Q9ZPY5	At2g46540/F11C10.23 OS=Arabidopsis thaliana GN=At2g46540 PE=2 SV=2 - [Q9ZPY5_ARATH]	43.85	21.54	1	1	1	2	65	6.8	8.92	0.896	0.834	0.847	1.141	1.303	1.106	1.18333	0.859	1.37757	0.00696467
Q8W4L0	Probable calcium-binding protein CML49 OS=Arabidopsis thaliana GN=CML49 PE=2 SV=1 - [CML49_ARATH]	43.84	4.48	2	1	1	2	335	35.3	6.87	1.081	1.101	1.177	0.887	0.821	0.902	0.87	1.11967	0.777017	0.00288551
Q8W4P1	Cyclin-dependent kinase C-2 OS=Arabidopsis thaliana GN=CDKC-2 PE=1 SV=2 - [CDKC2_ARATH]	43.81	6.43	3	2	2	2	513	57.1	9.1	0.91	0.873	0.902	1.123	1.156	1.172	1.15033	0.895	1.28529	0.000152637
Q42539	Protein-L-isoaspartate O-methyltransferase 1 OS=Arabidopsis thaliana GN=PIMT1 PE=1 SV=3 - [PIMT1_ARATH]	43.8	30.87	1	5	5	7	230	24.6	5.77	0.894	0.862	0.877	1.125	1.198	1.172	1.165	0.877667	1.32738	0.000247449
Q8VYA4	At4g18810 OS=Arabidopsis thaliana GN=F28A21.220 PE=2 SV=1 - [Q8VYA4_ARATH]	43.78	6.21	3	3	3	3	596	65.4	8.16	0.903	0.91	0.947	1.033	1.201	1.1	1.11133	0.92	1.20797	0.019539
Q9LVI6	Probable inactive receptor kinase RLK902 OS=Arabidopsis thaliana GN=RLK902 PE=1 SV=1 - [RLK90_ARATH]	43.76	3.71	1	2	2	2	647	70.4	6.57	0.864	0.911	0.904	1.17	1.155	1.138	1.15433	0.893	1.29265	0.000112297
F4K884	Pyrroline-5-carboxylate reductase OS=Arabidopsis thaliana GN=P5CR PE=3 SV=1 - [F4K884_ARATH]	43.74	5.38	2	1	1	2	223	23.2	5.43	1.171	0.964	0.965	0.73	1.069	1.061	0.953333	1.03333	0.922581	0.574956
P50699	Thaumatin-like protein OS=Arabidopsis thaliana GN=At1g18250 PE=2 SV=2 - [TLPH_ARATH]	43.73	5.35	2	1	1	1	243	25.9	8.47	0.809	0.918	0.747	1.217	1.124	1.374	1.23833	0.824667	1.50162	0.00946324
Q9SSL1	Protein C2-DOMAIN ABA-RELATED 7 OS=Arabidopsis thaliana GN=CAR7 PE=1 SV=1 - [CAR7_ARATH]	43.72	31.52	2	4	4	5	165	18.6	5.26	0.95	0.864	1.04	0.949	1.135	0.977	1.02033	0.951333	1.07253	0.421039
Q94B60	ATP-dependent Clp protease proteolytic subunit 4, chloroplastic OS=Arabidopsis thaliana GN=CLPP4 PE=1 SV=1 - [CLPP4_ARATH]	43.7	15.07	1	4	4	5	292	31.5	5.55	1.007	0.99	0.992	0.939	1.05	1.019	1.00267	0.996333	1.00636	0.859253
Q9M292	Nicalin OS=Arabidopsis thaliana GN=T22K7_10 PE=2 SV=1 - [Q9M292_ARATH]	43.68	7.61	2	4	4	5	565	62.2	6.42	1.07	1.137	0.947	0.924	0.923	1.012	0.953	1.05133	0.906468	0.193436
O64740	Protein transport protein SEC13 homolog B OS=Arabidopsis thaliana GN=SEC13B PE=1 SV=1 - [SC13B_ARATH]	43.65	20.53	1	4	6	7	302	32.6	5.74	1.109	1.094	1.081	0.815	0.901	0.936	0.884	1.09467	0.807552	0.00463083
Q5XF06	Mitochondrial import inner membrane translocase subunit TIM44-2 OS=Arabidopsis thaliana GN=TIM44-2 PE=1 SV=1 - [TI442_ARATH]	43.64	1.49	1	1	1	1	469	53.6	8.76	1.138	0.981	1.019	1.003	1.048	0.838	0.963	1.046	0.92065	0.355111
Q9FVQ2	Endoglucanase OS=Arabidopsis thaliana GN=F27K7.5 PE=3 SV=1 - [Q9FVQ2_ARATH]	43.63	7.87	2	3	3	4	623	68.6	8.97	1.125	0.833	0.962	0.941	0.987	1.127	1.01833	0.973333	1.04623	0.679915
P31166	Adenine phosphoribosyltransferase 1, chloroplastic OS=Arabidopsis thaliana GN=APT1 PE=1 SV=2 - [APT1_ARATH]	43.53	10.7	4	2	2	3	243	26.4	8.44	1.156	1.034	1.092	0.904	0.952	0.718	0.858	1.094	0.784278	0.0413289
Q9M1H3	ABC transporter F family member 4 OS=Arabidopsis thaliana GN=ABCF4 PE=2 SV=1 - [AB4F_ARATH]	43.5	6.09	1	3	3	3	723	80.4	6.32	1.051	0.941	1.017	1.083	0.961	0.708	0.917333	1.003	0.91459	0.498127
Q9SM23	Acyl-CoA-binding domain-containing protein 1 OS=Arabidopsis thaliana GN=ACBP1 PE=1 SV=2 - [ACBP1_ARATH]	43.49	8.88	2	3	3	4	338	37.5	4.61	0.903	0.903	0.977	0.902	1.143	1.172	1.07233	0.927667	1.15595	0.179625
Q9SKA3	C2 calcium/lipid-binding plant phosphoribosyltransferase family protein OS=Arabidopsis thaliana GN=F12K8.4 PE=4 SV=1 - [Q9SKA3_ARATH]	43.48	1.36	1	1	1	1	1029	118.3	8.92	0.974	0.73	1.016	0.975	1.279	1.133	1.129	0.906667	1.24522	0.150216
P61841	30S ribosomal protein S7, chloroplastic OS=Arabidopsis thaliana GN=rps7-A PE=1 SV=1 - [RR7_ARATH]	43.47	10.32	1	2	2	2	155	17.3	11.28	0.834	0.914	0.953	1.273	1.154	1.01	1.14567	0.900333	1.27249	0.0427893
O82233	Eukaryotic translation initiation factor isoform 4G-2 OS=Arabidopsis thaliana GN=EIF(ISO)4G2 PE=1 SV=1 - [IF4G2_ARATH]	43.47	4.42	2	2	3	5	747	82.8	7.66	0.99	1.074	0.966	0.938	1.109	0.964	1.00367	1.01	0.993729	0.924122
Q0WS78	Putative uncharacterized protein At3g03340 OS=Arabidopsis thaliana GN=At3g03340 PE=2 SV=1 - [Q0WS78_ARATH]	43.45	4.7	5	1	1	1	298	34	5.49	1.058	1.195	1.152	0.873	0.873	0.823	0.856333	1.135	0.754479	0.00311565
O24496	Hydroxyacylglutathione hydrolase cytoplasmic OS=Arabidopsis thaliana GN=GLX2-2 PE=1 SV=2 - [GLO2C_ARATH]	43.44	32.17	2	6	6	9	258	28.8	6.38	1.007	1.058	1.055	0.932	0.971	0.94	0.947667	1.04	0.911218	0.0105331
F4J3S3	Serine carboxypeptidase-like 7 OS=Arabidopsis thaliana GN=SCPL7 PE=3 SV=1 - [F4J3S3_ARATH]	43.44	12.44	3	5	5	6	394	45	6.61	0.904	1.058	0.98	0.956	1.002	0.994	0.984	0.980667	1.0034	0.946485
Q9SAD7	Eukaryotic translation initiation factor 4B2 OS=Arabidopsis thaliana GN=EIF4B2 PE=1 SV=1 - [IF4B2_ARATH]	43.39	25.87	1	13	14	20	549	59.3	8.72	0.793	0.807	0.849	1.205	1.286	1.209	1.23333	0.816333	1.51082	0.000182842
Q7Y175	Plant UBX domain-containing protein 5 OS=Arabidopsis thaliana GN=PUX5 PE=1 SV=1 - [PUX5_ARATH]	43.38	8.31	1	3	3	4	421	45	5.62	0.988	1.032	1.045	0.941	1.03	0.977	0.982667	1.02167	0.961827	0.277769
P41568	Protein translation factor SUI1 homolog 1 OS=Arabidopsis thaliana GN=At4g27130 PE=1 SV=2 - [SUI11_ARATH]	43.27	30.97	4	4	4	7	113	12.6	8.43	1.057	1.028	1.023	0.92	0.964	1.028	0.970667	1.036	0.936937	0.119625
Q93ZC5	Allene oxide cyclase 4, chloroplastic OS=Arabidopsis thaliana GN=AOC4 PE=2 SV=1 - [AOC4_ARATH]	43.25	8.27	1	1	2	2	254	27.8	9.07	0.969	0.9	0.857	1.16	1.049	1.188	1.13233	0.908667	1.24615	0.0139377
Q8W4S4	V-type proton ATPase subunit a3 OS=Arabidopsis thaliana GN=VHA-a3 PE=1 SV=1 - [VHAA3_ARATH]	43.25	7.92	3	1	6	7	821	92.8	5.94	1.35	1.323	1.302	0.551	0.55	0.727	0.609333	1.325	0.459874	0.000291454
Q9FY71	Protein EXORDIUM-like 4 OS=Arabidopsis thaliana GN=EXL4 PE=2 SV=1 - [EXOL4_ARATH]	43.19	10.07	1	1	3	5	278	29.5	9.48	1.068	1.287	1.118	0.826	0.854	0.806	0.828667	1.15767	0.715808	0.00828314
Q9SRY5	Glutathione S-transferase F7 OS=Arabidopsis thaliana GN=GSTF7 PE=2 SV=3 - [GSTF7_ARATH]	43.13	10.05	1	1	3	5	209	23.6	6.62	1.072	1.07	1.108	0.904	0.985	0.863	0.917333	1.08333	0.846769	0.0118869
Q9FGY1	Beta-D-xylosidase 1 OS=Arabidopsis thaliana GN=BXL1 PE=1 SV=1 - [BXL1_ARATH]	43.11	8.01	6	3	5	5	774	83.5	8.51	1.119	1.001	1.041	0.954	0.855	1.045	0.951333	1.05367	0.902879	0.189915
F4JN17	Ankyrin repeat domain-containing protein 2 OS=Arabidopsis thaliana GN=AKR2 PE=4 SV=1 - [F4JN17_ARATH]	43.07	18.42	3	4	5	10	304	33.1	4.53	0.942	1.021	0.995	1.02	0.983	1.065	1.02267	0.986	1.03719	0.331416
Q94II1	ERD7 protein (Fragment) OS=Arabidopsis thaliana GN=ERD7 PE=2 SV=1 - [Q94II1_ARATH]	42.98	23.81	3	8	8	9	441	47.7	5.49	0.984	1.043	1.06	0.989	0.997	0.97	0.985333	1.029	0.957564	0.147779
Q9S9P8	Ferredoxin--NADP reductase, root isozyme 2, chloroplastic OS=Arabidopsis thaliana GN=RFNR2 PE=1 SV=1 - [FNRR2_ARATH]	42.97	7.33	1	1	3	4	382	42.8	8.6	0.918	1.144	0.983	0.882	1.13	1	1.004	1.015	0.989163	0.9162
F4IDD6	Probable phenylalanine--tRNA ligase beta subunit OS=Arabidopsis thaliana GN=At1g72550 PE=4 SV=1 - [F4IDD6_ARATH]	42.95	12.33	2	6	6	9	584	65.9	5.49	1.025	1.018	1.099	0.92	0.926	0.961	0.935667	1.04733	0.89338	0.0180757
P56792	50S ribosomal protein L14, chloroplastic OS=Arabidopsis thaliana GN=rpl14 PE=3 SV=1 - [RK14_ARATH]	42.92	20.49	1	2	2	4	122	13.6	9.29	0.994	0.974	1.048	0.85	1.043	1.043	0.978667	1.00533	0.973475	0.715033
Q8L9Y0	Serine carboxypeptidase-like 25 OS=Arabidopsis thaliana GN=SCPL25 PE=2 SV=2 - [SCP25_ARATH]	42.91	5.29	1	2	2	2	473	53.4	8.7	1.123	1.067	0.922	0.884	0.968	1.035	0.962333	1.03733	0.927699	0.368877
Q945M1	NADH dehydrogenase [ubiquinone] 1 beta subcomplex subunit 9 OS=Arabidopsis thaliana GN=CIB22 PE=1 SV=1 - [NDUB9_ARATH]	42.86	42.74	1	5	5	7	117	13.6	8.68	0.94	1.025	1.021	1.015	1.064	1.025	1.03467	0.995333	1.03952	0.279454
P11490	Plastocyanin minor isoform, chloroplastic OS=Arabidopsis thaliana GN=PETE PE=1 SV=2 - [PLAS1_ARATH]	42.83	14.04	1	1	1	3	171	17.6	5.95	0.863	0.918	0.934	1.075	1.261	1.106	1.14733	0.905	1.26777	0.0168817
Q8VZM1	Putative N-terminal acetyltransferase OS=Arabidopsis thaliana GN=EMB2753 PE=2 SV=1 - [Q8VZM1_ARATH]	42.82	13.38	3	11	11	12	897	102.1	7.71	0.949	0.974	0.966	1.022	1.014	1.104	1.04667	0.963	1.08688	0.047921
Q9M0X9	4-coumarate--CoA ligase-like 7 OS=Arabidopsis thaliana GN=4CLL7 PE=1 SV=1 - [4CLL7_ARATH]	42.81	12.5	1	6	6	7	544	59.8	8.46	1.045	1.05	1.001	0.88	0.909	1.034	0.941	1.032	0.911822	0.141344
Q9SYT0	Annexin D1 OS=Arabidopsis thaliana GN=ANN1 PE=1 SV=1 - [ANXD1_ARATH]	42.76	22.4	2	7	7	8	317	36.2	5.38	0.993	1.022	1.007	0.965	1.022	0.984	0.990333	1.00733	0.983124	0.415453
Q8LC09	Putative uncharacterized protein OS=Arabidopsis thaliana PE=2 SV=1 - [Q8LC09_ARATH]	42.76	34.83	4	5	5	9	178	19.6	8.22	0.965	0.898	0.999	0.988	1.069	1.112	1.05633	0.954	1.10727	0.0946521
P55229	Glucose-1-phosphate adenylyltransferase large subunit 1, chloroplastic OS=Arabidopsis thaliana GN=ADG2 PE=1 SV=3 - [GLGL1_ARATH]	42.71	10.34	1	5	5	6	522	57.6	7.91	0.968	1.169	1.02	0.94	0.947	0.942	0.943	1.05233	0.896104	0.143866
Q9C542	At1g55160/T7N22.11 OS=Arabidopsis thaliana GN=F7A10.9 PE=2 SV=1 - [Q9C542_ARATH]	42.67	23.94	3	4	4	4	188	20.8	9.79	0.799	0.911	0.889	1.188	1.174	1.275	1.21233	0.866333	1.39938	0.00175687
Q42561	Oleoyl-acyl carrier protein thioesterase 1, chloroplastic OS=Arabidopsis thaliana GN=FATA PE=1 SV=1 - [FATA1_ARATH]	42.65	11.33	1	3	3	4	362	40.8	7.47	1.064	0.96	0.958	0.945	1.111	1.033	1.02967	0.994	1.03588	0.580368
F4K5S1	ARM repeat superfamily protein OS=Arabidopsis thaliana GN=At5g27970 PE=1 SV=1 - [F4K5S1_ARATH]	42.64	0.67	2	1	1	1	1630	180.4	6.09	NA	NA	NA	NA	NA	NA	NA	NA	NA	NA
Q9SAB3	Polyadenylate-binding protein RBP45B OS=Arabidopsis thaliana GN=RBP45B PE=1 SV=1 - [RB45B_ARATH]	42.57	14.81	2	5	5	8	405	44.1	5.87	1.058	1.11	1.073	0.913	0.938	0.925	0.925333	1.08033	0.856526	0.000812853
Q9SYI1	Putative uncharacterized protein AT4g01810 OS=Arabidopsis thaliana GN=T7B11.7 PE=4 SV=1 - [Q9SYI1_ARATH]	42.56	1.52	3	1	1	1	856	93.2	6.8	1.308	1.104	1.009	1.01	0.729	0.795	0.844667	1.14033	0.740719	0.0730809
Q9LJX4	Pumilio homolog 5 OS=Arabidopsis thaliana GN=APUM5 PE=1 SV=2 - [PUM5_ARATH]	42.55	13.11	2	10	11	12	961	106.9	5.96	0.984	0.96	0.961	0.969	0.991	1.04	1	0.968333	1.0327	0.230349
Q9SR77	Heme-binding-like protein At3g10130, chloroplastic OS=Arabidopsis thaliana GN=At3g10130 PE=2 SV=1 - [HBPL1_ARATH]	42.54	18.45	1	3	3	6	309	35	9.25	1.053	0.971	1.04	1.017	0.926	1.002	0.981667	1.02133	0.961162	0.355019
Q9ZW34	Cytosolic enolase 3 OS=Arabidopsis thaliana GN=ENO3 PE=1 SV=1 - [ENO3_ARATH]	42.48	16.63	1	5	6	8	475	51.6	5.52	1.024	0.955	0.962	1.06	0.984	1.046	1.03	0.980333	1.05066	0.195962
O49354	Ubiquinone biosynthesis O-methyltransferase, mitochondrial OS=Arabidopsis thaliana GN=COQ3 PE=2 SV=2 - [COQ3_ARATH]	42.47	8.7	2	2	2	2	322	35.3	8.41	1.145	0.99	0.926	0.972	0.858	1.073	0.967667	1.02033	0.948383	0.589481
Q9FVC8	4-hydroxy-tetrahydrodipicolinate synthase 2, chloroplastic OS=Arabidopsis thaliana GN=DHDPS2 PE=1 SV=2 - [DAPA2_ARATH]	42.39	2.74	2	1	1	3	365	40.3	7.56	1.019	1.113	1.015	0.804	1.139	0.922	0.955	1.049	0.910391	0.413887
O81126	Serine/arginine-rich splicing factor RSZ22 OS=Arabidopsis thaliana GN=RSZ22 PE=1 SV=1 - [RSZ22_ARATH]	42.37	17	1	1	4	7	200	22.4	11.44	0.828	0.778	0.843	1.266	1.315	1.166	1.249	0.816333	1.53001	0.000841959
Q94JV5	Nitrilase-like protein 2 OS=Arabidopsis thaliana GN=NLP2 PE=2 SV=1 - [NILP2_ARATH]	42.36	16.29	1	4	4	4	307	33.9	6.16	1.233	1.007	1.06	1.023	0.824	0.845	0.897333	1.1	0.815758	0.0947227
Q8LD92	Putative NADPH dependent mannose 6-phosphate reductase OS=Arabidopsis thaliana PE=2 SV=1 - [Q8LD92_ARATH]	42.33	17.15	2	2	5	6	309	35	6.54	0.988	1.066	0.897	1.011	1.071	1.025	1.03567	0.983667	1.05286	0.374632
Q8H185	1,2-dihydroxy-3-keto-5-methylthiopentene dioxygenase 4 OS=Arabidopsis thaliana GN=ARD4 PE=1 SV=1 - [MTND4_ARATH]	42.29	8.02	1	1	1	1	187	22.4	5.62	NA	NA	NA	NA	NA	NA	NA	NA	NA	NA
Q9C996	GDSL esterase/lipase 6 OS=Arabidopsis thaliana GN=GLIP6 PE=2 SV=1 - [GLIP6_ARATH]	42.27	11.33	1	4	4	4	362	40.2	8.56	0.861	0.996	0.923	1.133	1.125	1.097	1.11833	0.926667	1.20683	0.00909665
P52901	Pyruvate dehydrogenase E1 component subunit alpha-1, mitochondrial OS=Arabidopsis thaliana GN=E1 ALPHA PE=2 SV=2 - [ODPA1_ARATH]	42.16	19.02	4	5	7	9	389	43	7.49	1.041	1.036	1.118	0.856	0.845	0.893	0.864667	1.065	0.811894	0.00269645
C0Z2E9	AT5G35630 protein OS=Arabidopsis thaliana GN=At5g35630 PE=2 SV=1 - [C0Z2E9_ARATH]	42.16	7.91	2	1	1	1	278	30.7	7.71	1.178	1.258	1.118	0.752	0.761	0.852	0.788333	1.18467	0.665447	0.0015473
Q3E6S9	Probable L-cysteine desulfhydrase, chloroplastic OS=Arabidopsis thaliana GN=CpNIFS3 PE=1 SV=1 - [CNIF3_ARATH]	42.12	3.58	1	1	1	1	475	52.9	6.95	1.117	0.897	1.085	1.03	0.948	0.954	0.977333	1.033	0.946112	0.491126
Q9FWS4	50S ribosomal protein L31, chloroplastic OS=Arabidopsis thaliana GN=RPL31 PE=2 SV=1 - [RK31_ARATH]	42.11	17.36	1	2	2	3	144	16	9.8	0.899	0.904	0.887	1.123	1.194	1.103	1.14	0.896667	1.27138	0.000974049
Q8LFQ6	Glutaredoxin-C4 OS=Arabidopsis thaliana GN=GRXC4 PE=2 SV=2 - [GRXC4_ARATH]	42.1	27.41	5	4	4	6	135	14.8	5.96	1.105	1.077	1.148	0.863	0.826	0.795	0.828	1.11	0.745946	0.00058608
O65220	Peptidyl-prolyl cis-trans isomerase CYP28, chloroplastic OS=Arabidopsis thaliana GN=CYP28 PE=1 SV=1 - [CPY28_ARATH]	42.08	12.1	1	3	3	4	281	30.5	7.27	0.939	0.861	0.927	1.05	1.118	1.205	1.12433	0.909	1.23689	0.0134458
F4JMZ7	Monosaccharide-sensing protein 2 OS=Arabidopsis thaliana GN=TMT2 PE=1 SV=1 - [F4JMZ7_ARATH]	42.06	2.4	3	1	1	4	542	58.5	5.49	0.895	1.001	0.887	1.097	1.136	1.137	1.12333	0.927667	1.21092	0.00741966
O04922	Probable glutathione peroxidase 2 OS=Arabidopsis thaliana GN=GPX2 PE=1 SV=1 - [GPX2_ARATH]	42.04	31.95	4	4	6	11	169	18.9	5.72	0.873	0.977	0.909	1.157	1.11	1.038	1.10167	0.919667	1.1979	0.0168735
Q9FPJ8	Polyadenylate-binding protein RBP45A OS=Arabidopsis thaliana GN=RBP45A PE=2 SV=1 - [RB45A_ARATH]	42.04	13.44	1	4	4	4	387	42.3	6.55	1	0.935	1.081	0.978	1.044	0.979	1.00033	1.00533	0.995027	0.921303
B9DHH1	Nucleoside diphosphate kinase OS=Arabidopsis thaliana GN=At4g11010 PE=2 SV=1 - [B9DHH1_ARATH]	41.96	19.33	4	6	6	18	238	25.6	9.09	0.844	0.907	0.889	1.141	1.229	1.088	1.15267	0.88	1.30985	0.00380219
Q9LVF1	AT3g21550/MIL23_11 OS=Arabidopsis thaliana GN=DMP2 PE=2 SV=1 - [Q9LVF1_ARATH]	41.93	13.04	1	2	2	2	184	20.2	8.27	0.936	1.07	0.966	1.049	1.001	1.047	1.03233	0.990667	1.04206	0.392602
Q94BY2	At1g65820/F1E22_4 OS=Arabidopsis thaliana GN=At1g65820 PE=2 SV=1 - [Q94BY2_ARATH]	41.89	17.12	4	2	2	11	146	16.6	9.09	0.984	1.109	0.943	0.947	1.035	0.915	0.965667	1.012	0.954216	0.492983
Q9SVN5	Methionine--tRNA ligase, cytoplasmic OS=Arabidopsis thaliana GN=At4g13780 PE=2 SV=1 - [SYMC_ARATH]	41.85	14.68	1	9	9	14	797	89.8	7.01	0.999	0.956	0.964	1.065	1.026	1.049	1.04667	0.973	1.07571	0.0133068
Q9LVC8	2-methoxy-6-polyprenyl-1,4-benzoquinol methylase, mitochondrial OS=Arabidopsis thaliana GN=COQ5 PE=2 SV=1 - [COQ5_ARATH]	41.82	14.58	1	4	4	5	288	32.3	7.18	0.965	0.998	0.958	1.021	0.867	1.043	0.977	0.973667	1.00342	0.955957
O64644	Histone deacetylase complex subunit SAP18 OS=Arabidopsis thaliana GN=At2g45640 PE=1 SV=1 - [SAP18_ARATH]	41.81	25	2	4	4	5	152	17.2	9.17	0.693	0.831	0.687	1.388	1.382	1.245	1.33833	0.737	1.81592	0.000818069
O82291	Probable plastid-lipid-associated protein 3, chloroplastic OS=Arabidopsis thaliana GN=PAP3 PE=2 SV=1 - [PAP3_ARATH]	41.81	21.28	1	7	7	11	376	40.5	4.55	1.119	1.058	1.15	0.811	0.831	0.84	0.827333	1.109	0.746017	0.000576373
Q9FMT8	Major facilitator protein OS=Arabidopsis thaliana GN=At5g14120 PE=1 SV=1 - [Q9FMT8_ARATH]	41.75	3.11	1	1	1	1	579	63.1	7.49	0.818	0.827	0.94	1.079	1.137	1.35	1.18867	0.861667	1.3795	0.0231015
Q8LGG8	Universal stress protein A-like protein OS=Arabidopsis thaliana GN=At3g01520 PE=1 SV=2 - [USPAL_ARATH]	41.75	17.14	1	3	3	5	175	19.6	5.9	0.84	1.069	0.971	0.964	1.055	0.938	0.985667	0.96	1.02674	0.750116
Q9LT42	Uncharacterized protein OS=Arabidopsis thaliana PE=4 SV=1 - [Q9LT42_ARATH]	41.67	4.43	2	1	1	1	316	34.6	5.76	1.056	1.236	1.06	0.875	0.846	0.909	0.876667	1.11733	0.784606	0.0178857
Q24JL3	Thiosulfate/3-mercaptopyruvate sulfurtransferase 2 OS=Arabidopsis thaliana GN=STR2 PE=1 SV=1 - [STR2_ARATH]	41.59	15.2	1	4	4	5	342	37.4	6.13	0.999	1.136	1.039	0.982	0.93	0.929	0.947	1.058	0.895085	0.0662828
C0Z389	AT3G07300 protein OS=Arabidopsis thaliana GN=At3g07300 PE=2 SV=1 - [C0Z389_ARATH]	41.59	6.34	5	1	1	1	205	22.3	7.09	1.039	0.899	0.989	1.09	0.951	1.105	1.04867	0.975667	1.07482	0.316917
P55228	Glucose-1-phosphate adenylyltransferase small subunit, chloroplastic OS=Arabidopsis thaliana GN=APS1 PE=2 SV=2 - [GLGS_ARATH]	41.57	20.58	4	9	9	11	520	56.6	6.57	1.025	1.008	1.046	0.997	0.94	1.062	0.999667	1.02633	0.974018	0.510062
Q9FI99	UDP-glycosyltransferase 76C1 OS=Arabidopsis thaliana GN=UGT76C1 PE=1 SV=1 - [U76C1_ARATH]	41.54	3.66	1	1	1	1	464	52.3	7.02	1.042	0.974	1.038	1.046	0.958	0.991	0.998333	1.018	0.980681	0.592141
Q9LNJ3	Aspartyl protease family protein 2 OS=Arabidopsis thaliana GN=APF2 PE=2 SV=1 - [APF2_ARATH]	41.45	10.93	4	4	4	5	485	52.1	8.98	1.084	1.065	1.092	0.915	0.885	0.872	0.890667	1.08033	0.824437	0.000227649
Q9C504	At1g31760 OS=Arabidopsis thaliana GN=F27M3_4 PE=2 SV=1 - [Q9C504_ARATH]	41.45	19.64	1	2	2	4	112	12.3	9.83	0.814	0.827	0.799	1.302	1.318	1.151	1.257	0.813333	1.54549	0.00118037
Q9C835	Peptidyl-prolyl cis-trans isomerase CYP21-4 OS=Arabidopsis thaliana GN=CYP21-4 PE=2 SV=1 - [CP21D_ARATH]	41.31	22.46	1	5	5	8	236	26.4	8.87	0.925	1.043	0.953	1.029	1.123	0.982	1.04467	0.973667	1.07292	0.263613
Q9C5I1	UDP-sugar pyrophosphorylase OS=Arabidopsis thaliana GN=USP PE=1 SV=1 - [USP_ARATH]	41.27	9.45	1	5	5	6	614	67.8	6.49	1.022	1.069	1.076	0.873	0.861	0.964	0.899333	1.05567	0.85191	0.0130232
Q8LG27	At4g35905 OS=Arabidopsis thaliana GN=At4g35905 PE=2 SV=1 - [Q8LG27_ARATH]	41.27	18.18	1	1	1	1	77	8.4	7.84	0.881	0.791	0.921	1.08	1.284	1.195	1.18633	0.864333	1.37254	0.0102608
Q0WUG4	Glutathione synthetase gsh2 (Fragment) OS=Arabidopsis thaliana GN=At5g27380 PE=2 SV=1 - [Q0WUG4_ARATH]	41.24	13.07	2	5	5	5	528	59.2	6.49	1.015	0.917	0.975	1.003	1.017	1.169	1.063	0.969	1.09701	0.193963
O80910	At2g38410 OS=Arabidopsis thaliana GN=At2g38410 PE=1 SV=1 - [O80910_ARATH]	41.23	1.94	1	1	1	1	671	72.3	5.82	0.805	0.663	0.825	1.406	1.435	1.118	1.31967	0.764333	1.72656	0.00803677
Q9FG66	Acyl-peptide hydrolase-like OS=Arabidopsis thaliana GN=At5g36210 PE=4 SV=1 - [Q9FG66_ARATH]	41.23	19.03	2	11	11	16	678	75.4	5.21	0.981	1.052	1.048	1.047	0.919	0.944	0.97	1.027	0.944499	0.277983
Q9SGE0	UDP-D-apiose/UDP-D-xylose synthase 2 OS=Arabidopsis thaliana GN=AXS2 PE=2 SV=1 - [AXS2_ARATH]	41.19	6.94	2	3	3	3	389	43.8	5.87	0.919	1.131	0.949	0.955	0.871	0.98	0.935333	0.999667	0.935645	0.43362
A8MR72	Ankyrin repeat family protein OS=Arabidopsis thaliana GN=At2g26210 PE=4 SV=1 - [A8MR72_ARATH]	41.19	30.54	3	4	4	4	167	17.7	7.71	0.929	0.921	0.889	1.121	1.018	1.143	1.094	0.913	1.19825	0.0110056
Q9C8T3	Ribulose-phosphate 3-epimerase OS=Arabidopsis thaliana GN=F9N12.9 PE=2 SV=1 - [Q9C8T3_ARATH]	41.18	7.93	1	1	1	1	227	24.1	6.1	0.95	0.829	0.828	1.151	1.239	1.155	1.18167	0.869	1.3598	0.00324534
Q9FGK0	NADH dehydrogenase [ubiquinone] 1 beta subcomplex subunit 8, mitochondrial OS=Arabidopsis thaliana GN=At5g47570 PE=2 SV=1 - [NDUB8_ARATH]	41.16	7.2	1	1	1	1	125	13.2	8.16	0.931	0.929	1.065	0.923	1.09	1.13	1.04767	0.975	1.07453	0.402862
Q93ZC1	At3g12148/T23B7.11 OS=Arabidopsis thaliana PE=2 SV=1 - [Q93ZC1_ARATH]	41.12	29.23	5	8	8	11	325	35.8	8.43	1.102	0.99	0.966	0.951	0.874	0.893	0.906	1.01933	0.888816	0.0770823
Q9FZE0	Beta-glucosidase 40 OS=Arabidopsis thaliana GN=BGLU40 PE=2 SV=1 - [BGL40_ARATH]	41.12	5.88	1	2	2	3	510	58.1	8.02	1.105	1.094	1.158	0.806	0.894	0.77	0.823333	1.119	0.735776	0.00210703
A8MR49	60S ribosomal protein L31-3 OS=Arabidopsis thaliana GN=At5g56710 PE=4 SV=1 - [A8MR49_ARATH]	41.12	17.65	2	1	2	6	85	9.8	9.01	1.005	1.052	0.978	0.862	0.938	1.133	0.977667	1.01167	0.966392	0.704891
Q9SLL7	60S ribosomal protein L31-1 OS=Arabidopsis thaliana GN=RPL31A PE=3 SV=1 - [RL311_ARATH]	41.12	12.61	2	1	2	5	119	13.7	9.94	0.985	1.119	1.274	0.869	0.921	0.814	0.868	1.126	0.77087	0.0442136
P55034	26S proteasome non-ATPase regulatory subunit 4 homolog OS=Arabidopsis thaliana GN=RPN10 PE=1 SV=1 - [PSMD4_ARATH]	41.1	17.1	1	5	5	10	386	40.7	4.6	1.073	1.016	1.074	0.971	0.937	0.951	0.953	1.05433	0.903889	0.00930603
Q5HZ00	Solanesyl diphosphate synthase 3, chloroplastic/mitochondrial OS=Arabidopsis thaliana GN=SPS3 PE=1 SV=1 - [SPS3_ARATH]	41.06	4.5	1	2	2	2	422	46.4	6.76	1.002	1.195	1.008	0.863	0.957	0.946	0.922	1.06833	0.863027	0.104634
Q42182	Tropinone reductase homolog At2g29300 OS=Arabidopsis thaliana GN=At2g29300 PE=2 SV=2 - [TRNH7_ARATH]	41.06	22.81	10	5	5	7	263	28.2	6.89	0.944	1.025	1.011	0.973	0.962	0.991	0.975333	0.993333	0.981879	0.532582
Q9SEH9	Trehalase (Fragment) OS=Arabidopsis thaliana PE=2 SV=1 - [Q9SEH9_ARATH]	41.05	7.07	2	4	4	4	566	64	5.6	1.014	1.072	0.947	1.015	0.852	1.096	0.987667	1.011	0.976921	0.785888
Q9S764	Protein C2-DOMAIN ABA-RELATED 6 OS=Arabidopsis thaliana GN=CAR6 PE=1 SV=1 - [CAR6_ARATH]	41.05	10.92	1	2	2	2	174	19.6	5.03	1.154	1.028	1.133	0.824	0.944	0.869	0.879	1.105	0.795475	0.0125029
Q9SMY7	Probable pectinesterase/pectinesterase inhibitor 44 OS=Arabidopsis thaliana GN=PME44 PE=2 SV=2 - [PME44_ARATH]	41.03	2.29	2	1	1	1	525	58.5	7.23	0.806	0.958	0.921	1.273	1.16	1.05	1.161	0.895	1.29721	0.0281031
P56793	50S ribosomal protein L16, chloroplastic OS=Arabidopsis thaliana GN=rpl16 PE=3 SV=1 - [RK16_ARATH]	41.03	20.74	2	2	2	5	135	15.3	11.62	0.985	0.867	0.956	1.111	1.027	1.18	1.106	0.936	1.18162	0.0400565
Q9C681	Probable histone H2A.1 OS=Arabidopsis thaliana GN=At1g51060 PE=1 SV=1 - [H2A1_ARATH]	40.98	21.21	1	1	3	8	132	13.9	10.1	1.057	1.078	1.155	0.874	1.012	0.82	0.902	1.09667	0.822492	0.0391697
Q9LD28	Histone H2A.6 OS=Arabidopsis thaliana GN=RAT5 PE=1 SV=1 - [H2A6_ARATH]	40.98	26.15	1	3	5	10	130	13.6	10.15	1.077	1.211	1.128	0.794	0.977	0.759	0.843333	1.13867	0.740632	0.0193796
O04848	Probable histone H2AXa OS=Arabidopsis thaliana GN=At1g08880 PE=1 SV=1 - [H2AXA_ARATH]	40.98	26.76	2	2	4	9	142	14.8	10.32	0.953	1.033	1.003	1.055	1.016	1.006	1.02567	0.996333	1.02944	0.349493
O23442	Dynein light chain like protein OS=Arabidopsis thaliana GN=dl4005w PE=4 SV=2 - [O23442_ARATH]	40.92	11.65	3	1	1	1	103	11.6	7.49	1.073	1.282	1.098	0.775	0.941	0.788	0.834667	1.151	0.725167	0.0202544
F4J7I2	Ubiquitin carboxyl-terminal hydrolase 13 OS=Arabidopsis thaliana GN=UBP13 PE=3 SV=1 - [F4J7I2_ARATH]	40.89	12.3	2	7	12	14	1114	130.4	5.58	1.018	1.025	0.998	0.951	0.983	0.962	0.965333	1.01367	0.952318	0.0175349
Q8GZ22	Ankyrin repeat family protein OS=Arabidopsis thaliana GN=At2g03430 PE=1 SV=1 - [Q8GZ22_ARATH]	40.87	3.75	2	1	1	1	240	25.9	5.19	1.067	0.911	0.955	0.999	0.97	1.155	1.04133	0.977667	1.06512	0.437352
Q8VYI9	Non-specific lipid-transfer protein-like protein At5g64080 OS=Arabidopsis thaliana GN=At5g64080 PE=1 SV=1 - [NLTL5_ARATH]	40.85	10.99	1	2	2	3	182	18	6.96	1.021	0.93	1.044	0.988	1.014	0.928	0.976667	0.998333	0.978297	0.641785
Q9LEY9	H/ACA ribonucleoprotein complex subunit 2-like protein OS=Arabidopsis thaliana GN=At5g08180 PE=1 SV=1 - [NHP2_ARATH]	40.85	25.64	1	5	5	7	156	16.9	9.39	0.908	0.911	0.866	1.077	1.152	1.128	1.119	0.895	1.25028	0.00106661
Q9FKM2	Mitochondrial outer membrane protein porin 4 OS=Arabidopsis thaliana GN=VDAC4 PE=1 SV=1 - [VDAC4_ARATH]	40.84	10.22	1	2	2	3	274	29.5	9.22	1.038	1.17	1.042	0.94	0.884	0.897	0.907	1.08333	0.837231	0.0192802
Q8LG50	1-acyl-sn-glycerol-3-phosphate acyltransferase 2 OS=Arabidopsis thaliana GN=LPAT2 PE=1 SV=2 - [LPAT2_ARATH]	40.75	7.71	1	2	2	2	389	43.6	9.2	0.958	0.942	1.077	1.062	1.032	0.973	1.02233	0.992333	1.03023	0.580615
F4HWZ6	Acyl carrier protein 3 OS=Arabidopsis thaliana GN=ACP3 PE=4 SV=1 - [F4HWZ6_ARATH]	40.67	14.95	5	2	2	4	107	11.5	9.52	1.055	1.098	1.15	0.867	0.913	0.885	0.888333	1.101	0.806842	0.00223881
F4IXW2	Brefeldin A-inhibited guanine nucleotide-exchange protein 5 OS=Arabidopsis thaliana GN=BIG5 PE=1 SV=2 - [BIG5_ARATH]	40.66	1.84	1	3	3	3	1739	192.8	5.58	1.018	1.124	0.999	0.796	0.95	1.025	0.923667	1.047	0.882203	0.188173
Q9SPI3	Splicing factor SR1D OS=Arabidopsis thaliana PE=4 SV=1 - [Q9SPI3_ARATH]	40.65	13.41	9	2	4	5	261	28.8	8.03	1.037	0.91	0.919	1.069	1.067	1.071	1.069	0.955333	1.11898	0.0499742
Q9SN58	UDP-glucose 4-epimerase 5 OS=Arabidopsis thaliana GN=UGE5 PE=1 SV=3 - [UGE5_ARATH]	40.61	7.98	1	1	2	2	351	38.6	5.81	1.081	0.905	1.009	1.041	1.008	1.011	1.02	0.998333	1.0217	0.699179
O22773	Thylakoid lumenal 16.5 kDa protein, chloroplastic OS=Arabidopsis thaliana GN=At4g02530 PE=1 SV=3 - [TL16_ARATH]	40.56	22.22	1	4	4	4	216	23.6	8.51	1.063	1.014	1.062	0.935	0.958	0.913	0.935333	1.04633	0.893915	0.00587967
P94014	Germin-like protein subfamily 2 member 1 OS=Arabidopsis thaliana GN=GLP4 PE=2 SV=2 - [GL21_ARATH]	40.54	18.26	3	4	4	10	219	22.9	8.44	0.732	0.731	0.75	1.347	1.52	1.261	1.376	0.737667	1.86534	0.00112245
O81769	Probable diphthine methyl ester synthase OS=Arabidopsis thaliana GN=At4g31790 PE=2 SV=1 - [DPH5_ARATH]	40.5	10.83	1	2	2	5	277	30.8	5.08	1.122	0.791	0.908	1.234	1.049	1.06	1.11433	0.940333	1.18504	0.201432
C0Z2D8	AT1G20440 protein OS=Arabidopsis thaliana GN=At1g20440 PE=2 SV=1 - [C0Z2D8_ARATH]	40.47	7.91	17	1	2	6	177	20.2	4.69	NA	NA	NA	NA	NA	NA	NA	NA	NA	NA
Q9M8X4	Germin-like protein subfamily 1 member 4 OS=Arabidopsis thaliana GN=At3g04180 PE=3 SV=1 - [GL14_ARATH]	40.4	11.26	1	1	2	3	222	24.1	6.92	0.803	1.049	1.154	1.052	0.962	1.063	1.02567	1.002	1.02362	0.838479
Q9M8X5	Germin-like protein subfamily 1 member 5 OS=Arabidopsis thaliana GN=At3g04190 PE=2 SV=1 - [GL15_ARATH]	40.4	11.26	1	1	2	4	222	24	9.2	0.802	0.909	0.878	1.177	1.09	1.291	1.186	0.863	1.37428	0.00821444
B9DH86	AT5G20060 protein OS=Arabidopsis thaliana GN=At5g20060 PE=2 SV=1 - [B9DH86_ARATH]	40.4	7.54	2	2	2	5	252	26.7	6.62	1.077	0.924	0.985	1.016	1.043	1.042	1.03367	0.995333	1.03851	0.445444
Q9SID3	Hydroxyacylglutathione hydrolase 2, mitochondrial OS=Arabidopsis thaliana GN=At2g31350 PE=1 SV=1 - [GLO2N_ARATH]	40.38	7.1	1	1	1	1	324	35.8	8.79	0.806	0.778	0.72	1.222	1.303	1.393	1.306	0.768	1.70052	0.000633894
Q42577	NADH dehydrogenase [ubiquinone] iron-sulfur protein 7, mitochondrial OS=Arabidopsis thaliana GN=At5g11770 PE=2 SV=1 - [NDUS7_ARATH]	40.37	16.06	1	4	4	8	218	24	9.44	0.93	1.027	1.013	1.033	1.023	1.007	1.021	0.99	1.03131	0.376712
F4J378	Histone deacetylase HDT1 OS=Arabidopsis thaliana GN=HDA3 PE=1 SV=1 - [F4J378_ARATH]	40.34	3.72	2	1	1	1	242	26	5.45	0.864	0.904	0.974	1.08	1.117	1.185	1.12733	0.914	1.23341	0.00867478
Q9LYW9	DnaJ protein P58IPK homolog OS=Arabidopsis thaliana GN=P58IPK PE=1 SV=1 - [DNJ36_ARATH]	40.26	7.05	1	3	3	3	482	53.7	6.33	0.955	1.002	0.96	1.023	1.006	1.097	1.042	0.972333	1.07165	0.0926149
Q08466	Casein kinase II subunit alpha-2 OS=Arabidopsis thaliana GN=CKA2 PE=2 SV=3 - [CSK22_ARATH]	40.25	7.44	2	2	2	2	403	47.2	8.27	0.977	1.005	1.093	1.03	0.971	0.932	0.977667	1.025	0.953821	0.353034
O22941	Insulin-degrading enzyme-like 1, peroxisomal OS=Arabidopsis thaliana GN=PXM16 PE=2 SV=1 - [IDE1_ARATH]	40.24	2.16	1	2	2	2	970	110.9	6.04	0.967	0.97	0.947	1.077	0.995	1.123	1.065	0.961333	1.10784	0.0530311
Q9M2E0	DEAD-box ATP-dependent RNA helicase 12 OS=Arabidopsis thaliana GN=RH12 PE=2 SV=1 - [RH12_ARATH]	40.22	6.83	1	2	3	4	498	56.7	8.4	0.956	1.122	0.961	0.927	0.972	1.082	0.993667	1.013	0.980915	0.799844
Q0WRZ7	Signal recognition particle receptor beta subunit-like protein OS=Arabidopsis thaliana GN=At5g05670 PE=2 SV=1 - [Q0WRZ7_ARATH]	40.2	8.84	2	2	2	2	249	27.9	8.4	1.129	1.082	1.054	0.927	0.931	0.858	0.905333	1.08833	0.831853	0.00476017
Q9SSS9	ATP synthase subunit delta, chloroplastic OS=Arabidopsis thaliana GN=ATPD PE=1 SV=1 - [ATPD_ARATH]	40.19	30.77	1	8	8	9	234	25.7	9.06	0.945	1.055	0.982	1.063	1.064	1.074	1.067	0.994	1.07344	0.0880626
Q8RWE9	Nucleobase-ascorbate transporter 5 OS=Arabidopsis thaliana GN=NAT5 PE=2 SV=1 - [NAT5_ARATH]	40.17	10.8	4	5	5	5	528	57.3	9.52	1.019	1.053	1.019	0.99	0.91	0.951	0.950333	1.03033	0.922355	0.0358875
Q9SXC8	Ubiquitin-fold modifier-conjugating enzyme 1 OS=Arabidopsis thaliana GN=At1g27530 PE=2 SV=1 - [UFC1_ARATH]	40.1	20.11	1	4	4	4	174	19.6	7.81	1.012	1.025	1.024	0.981	1.038	0.945	0.988	1.02033	0.968311	0.303277
B3H6E6	Uncharacterized protein OS=Arabidopsis thaliana GN=At5g20090 PE=4 SV=1 - [B3H6E6_ARATH]	40.01	12.37	2	1	1	1	97	10.9	9.5	1.049	1.114	1.249	0.927	0.831	0.807	0.855	1.13733	0.751758	0.01523
Q8S8P4	Expressed protein OS=Arabidopsis thaliana GN=At2g38465 PE=2 SV=1 - [Q8S8P4_ARATH]	39.93	25	1	2	2	2	84	9.4	7.99	1.072	1.103	1.118	0.906	0.853	0.916	0.891667	1.09767	0.812329	0.000977235
Q0WWB3	Mitochondrial F1-ATPase, gamma subunit OS=Arabidopsis thaliana GN=At2g33040 PE=2 SV=1 - [Q0WWB3_ARATH]	39.9	19.69	3	6	6	9	325	35.5	8.9	0.966	1.039	0.939	1.061	0.993	1.034	1.02933	0.981333	1.04891	0.251263
Q9LTB0	Exocyst complex component EXO84B OS=Arabidopsis thaliana GN=EXO84B PE=1 SV=1 - [EX84B_ARATH]	39.83	2.13	3	1	1	1	752	82.7	5.38	0.932	1.118	1.073	0.887	0.905	1.114	0.968667	1.041	0.930516	0.475267
Q9SJZ2	Peroxidase 17 OS=Arabidopsis thaliana GN=PER17 PE=2 SV=1 - [PER17_ARATH]	39.79	10.64	1	3	3	3	329	36.6	5.22	1.102	1.164	1.229	0.841	0.784	0.798	0.807667	1.165	0.693276	0.000908768
Q8GWG0	AtGPAT9 OS=Arabidopsis thaliana GN=GPAT9 PE=1 SV=1 - [Q8GWG0_ARATH]	39.75	6.12	1	1	1	1	376	43	8.53	1.511	0.944	0.448	0.456	1.023	1.572	1.017	0.967667	1.05098	0.917082
F4I894	Protein ILITYHIA OS=Arabidopsis thaliana GN=ILA PE=1 SV=1 - [F4I894_ARATH]	39.73	3.45	3	7	7	9	2610	284.6	7.17	1.07	1.07	0.958	0.899	0.885	1.034	0.939333	1.03267	0.909619	0.197294
Q8VZL7	Prefoldin chaperone subunit family protein OS=Arabidopsis thaliana GN=At1g26660 PE=2 SV=1 - [Q8VZL7_ARATH]	39.72	7.24	2	1	1	2	152	17.8	6.35	1.212	0.922	1.053	0.953	0.973	0.834	0.92	1.06233	0.866018	0.206122
Q9FJU9	Glucan endo-1,3-beta-glucosidase 13 OS=Arabidopsis thaliana GN=At5g56590 PE=1 SV=1 - [E1313_ARATH]	39.69	6.13	1	2	2	2	506	55.6	7.78	0.969	1.032	1.099	1.031	0.879	1.024	0.978	1.03333	0.946452	0.423632
Q9FRL2	Cytosolic IMP-GMP specific 5'-nucleotidase, putative; 41097-37373 OS=Arabidopsis thaliana GN=F22H5.7 PE=4 SV=1 - [Q9FRL2_ARATH]	39.68	2.55	2	1	1	2	510	59.3	6.65	0.814	0.763	0.82	1.367	1.344	1.121	1.27733	0.799	1.59866	0.00402405
Q93Z08	Glucan endo-1,3-beta-glucosidase 6 OS=Arabidopsis thaliana GN=At5g58090 PE=1 SV=2 - [E136_ARATH]	39.67	8.39	1	3	3	6	477	52.2	5.92	1.084	1.069	1.041	0.916	0.955	0.875	0.915333	1.06467	0.859737	0.00475436
Q8GXG3	Bifunctional inhibitor/lipid-transfer protein/seed storage 2S albumin-like protein OS=Arabidopsis thaliana GN=At5g55410 PE=2 SV=1 - [Q8GXG3_ARATH]	39.66	14.02	2	2	2	3	107	11.9	8.68	0.916	0.889	0.931	1.076	1.233	1.131	1.14667	0.912	1.25731	0.00787719
Q9SCY0	Phosphoglucomutase, chloroplastic OS=Arabidopsis thaliana GN=PGMP PE=1 SV=2 - [PGMP_ARATH]	39.63	24.88	1	12	12	15	623	67.9	5.74	1.034	1.052	1.038	0.952	0.949	0.963	0.954667	1.04133	0.916773	0.00023387
Q9XF89	Chlorophyll a-b binding protein CP26, chloroplastic OS=Arabidopsis thaliana GN=LHCB5 PE=1 SV=1 - [CB5_ARATH]	39.62	3.21	1	1	1	1	280	30.1	6.37	0.943	1.051	1.004	1.034	1.06	0.981	1.025	0.999333	1.02568	0.546006
Q9SA21	F3O9.2 protein OS=Arabidopsis thaliana GN=F3O9.2 PE=4 SV=1 - [Q9SA21_ARATH]	39.59	21.74	2	5	5	7	230	26.3	9.06	0.743	0.723	0.812	1.227	1.346	1.334	1.30233	0.759333	1.7151	0.000306183
F4K1Y4	Nuclear transport factor 2 and RNA recognition motif domain-containing protein OS=Arabidopsis thaliana GN=At5g60980 PE=1 SV=1 - [F4K1Y4_ARATH]	39.5	11.11	4	5	5	5	459	49.4	5.96	1.058	1.128	1.051	0.803	0.861	0.945	0.869667	1.079	0.805993	0.0120467
Q67ZY9	Putative uncharacterized protein At5g40190 OS=Arabidopsis thaliana GN=At5g40190 PE=2 SV=1 - [Q67ZY9_ARATH]	39.41	7.1	2	1	1	1	183	20.6	4.93	1.035	0.918	0.866	1.064	0.941	1.261	1.08867	0.939667	1.15857	0.231624
Q9ZW33	Mitochondrial import inner membrane translocase subunit TIM10 OS=Arabidopsis thaliana GN=TIM10 PE=1 SV=1 - [TIM10_ARATH]	39.29	36.14	2	3	3	4	83	9.3	7.74	1.019	0.88	0.899	1.098	1.103	1.179	1.12667	0.932667	1.20801	0.0187911
F4IWC5	NifU-like protein 4 OS=Arabidopsis thaliana GN=NFU4 PE=4 SV=1 - [F4IWC5_ARATH]	39.11	5.41	2	1	1	1	222	23.9	5.74	1.009	0.963	1.043	1.065	1.046	0.939	1.01667	1.005	1.01161	0.810513
P56779	Cytochrome b559 subunit alpha OS=Arabidopsis thaliana GN=psbE PE=1 SV=4 - [PSBE_ARATH]	39.11	14.46	1	1	1	1	83	9.4	4.94	1.212	1.106	1.422	0.783	0.574	0.779	0.712	1.24667	0.571123	0.00986955
Q9LVA0	BAG family molecular chaperone regulator 7 OS=Arabidopsis thaliana GN=BAG7 PE=1 SV=1 - [BAG7_ARATH]	39.1	19.28	1	8	9	13	446	51.5	9.26	1.027	0.999	0.944	0.98	0.938	1.077	0.998333	0.99	1.00842	0.870169
Q8W4E6	At5g25265 OS=Arabidopsis thaliana GN=At5g25265 PE=2 SV=1 - [Q8W4E6_ARATH]	39.04	4.37	1	1	1	1	366	40.9	8.57	1.133	0.946	0.985	1.005	0.815	1.141	0.987	1.02133	0.966384	0.77128
Q9XIC8	F23M19.10 OS=Arabidopsis thaliana GN=F23M19.10 PE=1 SV=1 - [Q9XIC8_ARATH]	39.03	2.75	3	2	2	2	619	68.9	5.33	1.07	1.068	1.206	0.883	0.727	1.008	0.872667	1.11467	0.782895	0.0603255
Q8RXK6	DEAD-box ATP-dependent RNA helicase 8 OS=Arabidopsis thaliana GN=RH8 PE=2 SV=1 - [RH8_ARATH]	39.03	4.75	3	1	2	2	505	57.7	8.15	1.124	0.894	1.09	0.955	0.954	1.002	0.970333	1.036	0.936615	0.421568
O22788	Probable peroxygenase 3 OS=Arabidopsis thaliana GN=PXG3 PE=1 SV=1 - [PXG3_ARATH]	39.02	14.83	1	3	3	4	236	26.6	5.34	0.962	0.867	0.718	1.17	1.314	1.155	1.213	0.849	1.42874	0.0140056
Q58FV2	Gamma-tubulin complex component OS=Arabidopsis thaliana GN=At4g00695 PE=2 SV=1 - [Q58FV2_ARATH]	39.02	17.19	2	2	2	2	128	14.7	7.11	0.826	1.626	1.996	0.389	0.471	0.456	0.438667	1.48267	0.295863	0.0393293
Q94K85	Cathepsin B-like cysteine protease OS=Arabidopsis thaliana GN=T15B16.17a:T15B16.17b PE=2 SV=1 - [Q94K85_ARATH]	38.95	6.13	2	1	1	1	359	39.4	6.18	0.707	0.776	0.657	1.236	1.432	1.458	1.37533	0.713333	1.92804	0.00106194
Q9SD41	Putative uncharacterized protein F24M12.90 OS=Arabidopsis thaliana GN=F24M12.90 PE=4 SV=1 - [Q9SD41_ARATH]	38.86	8.53	3	5	5	7	680	75.3	7.97	1.058	0.949	1.001	1.084	0.965	0.933	0.994	1.00267	0.991356	0.883863
Q8RVQ9	Histone H3-like centromeric protein HTR12 OS=Arabidopsis thaliana GN=HTR12 PE=1 SV=3 - [HTR12_ARATH]	38.85	12.92	1	1	1	1	178	19.7	11.58	1.064	0.843	1.056	1.267	0.796	1.05	1.03767	0.987667	1.05062	0.761919
F4HYH1	Glutamyl-tRNA(Gln) amidotransferase subunit B, chloroplastic/mitochondrial OS=Arabidopsis thaliana GN=GATB PE=3 SV=1 - [F4HYH1_ARATH]	38.79	4.71	2	2	2	2	488	54	6.58	1.064	1.238	0.896	0.928	1.011	0.862	0.933667	1.066	0.87586	0.286643
Q9S825	Probable eukaryotic translation initiation factor 5-2 OS=Arabidopsis thaliana GN=At1g77840 PE=2 SV=1 - [IF5Z_ARATH]	38.79	2.29	2	1	1	1	437	48.6	5.59	0.71	0.876	0.782	2.123	0.894	0.935	1.31733	0.789333	1.66892	0.263162
Q9LK88	NADPH:quinone oxidoreductase OS=Arabidopsis thaliana GN=NQR PE=1 SV=1 - [NQR_ARATH]	38.79	6.63	1	1	1	1	196	21.5	7.5	0.826	0.908	0.877	1.235	1.161	1.164	1.18667	0.870333	1.36346	0.000742881
Q9FJW7	ADP-ribosylation factor-like protein OS=Arabidopsis thaliana PE=3 SV=1 - [Q9FJW7_ARATH]	38.78	8.48	4	1	1	1	165	18	7.78	1.044	1.103	1.112	0.946	0.939	0.863	0.916	1.08633	0.843203	0.00749698
A8MR97	Eukaryotic translation initiation factor 4G OS=Arabidopsis thaliana GN=EIF4G PE=1 SV=1 - [A8MR97_ARATH]	38.76	4.18	3	6	6	6	1723	187.4	7.71	0.931	0.927	0.896	1.128	1.059	1.102	1.09633	0.918	1.19426	0.00148081
O64903	Nucleoside diphosphate kinase II, chloroplastic OS=Arabidopsis thaliana GN=NDPK2 PE=1 SV=2 - [NDK2_ARATH]	38.75	15.15	4	4	4	7	231	25.5	8.95	1.172	1.055	1.167	0.828	0.798	0.785	0.803667	1.13133	0.710371	0.00124004
O04326	Nuclear pore complex protein NUP35 OS=Arabidopsis thaliana GN=NUP35 PE=1 SV=1 - [NUP35_ARATH]	38.69	9.12	1	2	2	3	329	35.4	9.48	0.888	1.079	0.912	1.038	1	1.166	1.068	0.959667	1.11289	0.238646
Q8L770	ATP-dependent Clp protease proteolytic subunit-related protein 3, chloroplastic OS=Arabidopsis thaliana GN=CLPR3 PE=1 SV=1 - [CLPR3_ARATH]	38.65	14.24	3	4	4	4	330	36.3	8.48	1.216	1.035	1.021	0.865	0.97	0.874	0.903	1.09067	0.827934	0.0578832
Q9LYK7	Pescadillo homolog OS=Arabidopsis thaliana GN=T15N1_10 PE=3 SV=1 - [Q9LYK7_ARATH]	38.62	2.2	1	1	1	1	590	67.9	8.66	1.092	0.919	1.085	0.938	0.943	1.045	0.975333	1.032	0.94509	0.441656
Q9LJN1	At3g19650 OS=Arabidopsis thaliana GN=At3g19650 PE=1 SV=1 - [Q9LJN1_ARATH]	38.61	2.32	1	1	1	1	302	35.3	10.04	1.136	0.883	1.002	0.926	1.072	1.016	1.00467	1.007	0.997683	0.979306
O22139	At2g45330 OS=Arabidopsis thaliana PE=2 SV=1 - [O22139_ARATH]	38.61	7	4	1	1	1	257	28.7	9.19	0.96	1.101	0.839	0.978	1.118	1.088	1.06133	0.966667	1.09793	0.336967
Q70DU8	Aldehyde dehydrogenase family 3 member H1 OS=Arabidopsis thaliana GN=ALDH3H1 PE=1 SV=2 - [AL3H1_ARATH]	38.59	7.64	1	3	3	4	484	53.1	8.35	1.008	1.051	0.906	1.004	1.083	0.939	1.00867	0.988333	1.02057	0.75115
Q9SHB0	Putative uncharacterized protein At2g40800 OS=Arabidopsis thaliana GN=T7D17.2 PE=1 SV=1 - [Q9SHB0_ARATH]	38.58	5.04	2	2	2	2	377	41.7	9.8	1.061	1.136	1.064	0.885	0.951	0.9	0.912	1.087	0.839006	0.00521092
Q9FHN5	Probable pectinesterase/pectinesterase inhibitor 59 OS=Arabidopsis thaliana GN=PME59 PE=2 SV=1 - [PME59_ARATH]	38.57	3.73	2	2	2	2	536	58.8	9.48	1.07	1.068	1.035	0.99	0.886	0.965	0.947	1.05767	0.895367	0.0293785
Q84M92	Actin-related protein 4 OS=Arabidopsis thaliana GN=ARP4 PE=1 SV=1 - [ARP4_ARATH]	38.52	12.47	2	4	4	4	441	48.9	5.35	1.043	0.982	1.091	0.899	1.003	0.952	0.951333	1.03867	0.915918	0.115382
Q9SFU0	Protein transport protein Sec24-like At3g07100 OS=Arabidopsis thaliana GN=At3g07100 PE=2 SV=2 - [SC24A_ARATH]	38.48	7.03	1	7	7	9	1038	113.9	7.91	0.999	1	0.952	0.931	0.977	0.988	0.965333	0.983667	0.981362	0.480116
F4K658	FAD/NAD(P)-binding oxidoreductase family protein OS=Arabidopsis thaliana GN=At5g49555 PE=4 SV=1 - [F4K658_ARATH]	38.44	10.25	2	4	4	5	556	60.5	6.8	1.068	1.032	1.102	0.863	0.912	1.058	0.944333	1.06733	0.88476	0.118087
Q9MAU6	Protein disulfide-isomerase like 2-2 OS=Arabidopsis thaliana GN=PDIL2-2 PE=2 SV=2 - [PDI22_ARATH]	38.41	14.32	1	5	5	7	447	48.4	6.47	1.019	0.981	0.933	0.949	1.079	0.994	1.00733	0.977667	1.03034	0.550111
Q9SFX3	Dolichyl-diphosphooligosaccharide--protein glycosyltransferase subunit 1A OS=Arabidopsis thaliana GN=OST1A PE=2 SV=1 - [OST1A_ARATH]	38.39	5.86	1	4	4	4	614	68.6	8.47	1.069	1.037	1.09	0.939	0.84	0.986	0.921667	1.06533	0.865144	0.0347342
Q8VZP1	(DL)-glycerol-3-phosphatase 2 OS=Arabidopsis thaliana GN=GPP2 PE=1 SV=1 - [GPP2_ARATH]	38.39	6.25	1	1	1	1	240	26.8	5.95	0.952	1.061	1.171	0.859	0.975	1	0.944667	1.06133	0.890075	0.202906
Q9SMV6	Protein EXPORTIN 1A OS=Arabidopsis thaliana GN=XPO1 PE=1 SV=1 - [XPO1A_ARATH]	38.36	7.26	2	7	7	9	1075	123.2	5.57	0.919	1.084	1.001	1.012	1.031	1.011	1.018	1.00133	1.01664	0.746296
P58684	Probable signal peptidase complex subunit 2 OS=Arabidopsis thaliana GN=At2g39960 PE=2 SV=1 - [SPCS2_ARATH]	38.35	9.38	4	2	2	2	192	21.6	8.94	1.051	1.17	1.229	0.823	0.893	0.777	0.831	1.15	0.722609	0.00687287
Q8W4M5	Pyrophosphate--fructose 6-phosphate 1-phosphotransferase subunit beta 1 OS=Arabidopsis thaliana GN=PFP-BETA1 PE=1 SV=1 - [PFPB1_ARATH]	38.34	2.12	2	1	1	1	566	61.4	6.1	1.059	1.222	1.056	0.877	1.019	0.761	0.885667	1.11233	0.796224	0.0705954
Q94AG6	S-adenosylmethionine carrier 1, chloroplastic/mitochondrial OS=Arabidopsis thaliana GN=SAMC1 PE=1 SV=1 - [SAMC1_ARATH]	38.32	4.31	1	1	1	1	325	34.8	9.66	1.054	0.951	0.977	1.006	0.851	1.207	1.02133	0.994	1.0275	0.811988
Q9LQ04	Bifunctional dTDP-4-dehydrorhamnose 3,5-epimerase/dTDP-4-dehydrorhamnose reductase OS=Arabidopsis thaliana GN=NRS/ER PE=1 SV=1 - [RMLCD_ARATH]	38.31	8.64	1	2	3	3	301	33.6	5.97	0.912	0.923	1.006	1.269	0.868	1.1	1.079	0.947	1.13939	0.332946
O64636	Cytochrome P450 76C1 OS=Arabidopsis thaliana GN=CYP76C1 PE=2 SV=1 - [C76C1_ARATH]	38.29	6.25	3	3	3	3	512	56.8	7.52	0.936	1.066	1.056	1.089	0.939	0.98	1.00267	1.01933	0.983649	0.798911
Q9LEU8	Argininosuccinate lyase, chloroplastic OS=Arabidopsis thaliana GN=At5g10920 PE=2 SV=1 - [ARLY_ARATH]	38.26	6.77	1	3	3	3	517	57.5	5.88	0.916	1.006	0.959	1.069	1.107	1.061	1.079	0.960333	1.12357	0.0160286
Q9CA90	Glyoxylate/hydroxypyruvate reductase A HPR2 OS=Arabidopsis thaliana GN=HPR2 PE=1 SV=1 - [HPR2_ARATH]	38.24	30.03	1	9	9	12	313	34.1	5.9	1.091	1.074	1.044	0.945	0.876	0.941	0.920667	1.06967	0.860704	0.00475128
O80501	Ras-related protein RABH1b OS=Arabidopsis thaliana GN=RABH1B PE=1 SV=1 - [RAH1B_ARATH]	38.16	24.52	5	3	4	9	208	23.1	7.9	1.022	1.043	1.07	0.999	1.039	0.828	0.955333	1.045	0.914195	0.24692
Q9FJR5	Plant invertase/pectin methylesterase inhibitor domain-containing protein OS=Arabidopsis thaliana GN=At5g46960 PE=4 SV=1 - [Q9FJR5_ARATH]	38.15	12.64	3	2	2	3	174	19.1	5.16	1.056	0.857	0.943	1.07	0.988	1.041	1.033	0.952	1.08508	0.264201
Q9STS7	Chloroplastic lipocalin OS=Arabidopsis thaliana GN=CHL PE=1 SV=1 - [CHL_ARATH]	38.13	9.63	1	2	2	3	353	39.1	6.74	0.835	0.79	0.967	1.092	1.053	1.345	1.16333	0.864	1.34645	0.0474109
F4IR82	Nucleic acid binding/RNA binding protein OS=Arabidopsis thaliana GN=At2g02570 PE=4 SV=1 - [F4IR82_ARATH]	38.11	4.86	3	1	1	2	288	32	5.43	1.095	1.038	0.967	0.923	0.971	1.013	0.969	1.03333	0.937742	0.228089
Q42566	ATsEH OS=Arabidopsis thaliana GN=ATsEH PE=2 SV=1 - [Q42566_ARATH]	38.1	14.33	3	4	4	7	321	36.4	5.44	0.983	1.117	1.137	0.958	0.862	0.886	0.902	1.079	0.835959	0.0347122
Q8RWU7	Plant UBX domain-containing protein 4 OS=Arabidopsis thaliana GN=PUX4 PE=1 SV=1 - [PUX4_ARATH]	38.04	10.89	2	3	3	4	303	32.9	5.95	0.759	0.878	0.788	1.3	1.164	1.198	1.22067	0.808333	1.5101	0.00161831
Q9LM92	Small nuclear ribonucleoprotein SmD3b OS=Arabidopsis thaliana GN=SMD3B PE=2 SV=1 - [SMD3B_ARATH]	38.03	19.85	3	3	3	7	131	14.2	10.27	0.923	1.035	1.015	0.987	0.948	1.056	0.997	0.991	1.00605	0.904089
O03983	Probable desiccation-related protein LEA14 OS=Arabidopsis thaliana GN=LEA14 PE=1 SV=1 - [LEA14_ARATH]	38.01	23.18	1	3	3	3	151	16.5	4.96	0.93	1.028	1.048	0.97	1.005	0.937	0.970667	1.002	0.968729	0.491373
Q8LG38	Putative RING zinc finger protein OS=Arabidopsis thaliana PE=2 SV=1 - [Q8LG38_ARATH]	38.01	4.37	2	1	1	1	343	38.3	5.31	1.049	0.809	0.927	1.185	1.059	1.08	1.108	0.928333	1.19354	0.0866707
F4JCU3	Diphosphomevalonate decarboxylase MVD2 OS=Arabidopsis thaliana GN=MVD2 PE=2 SV=1 - [MVD2_ARATH]	37.99	10.74	1	1	4	5	419	46.2	6.47	0.935	0.916	0.834	1.121	1.22	1.113	1.15133	0.895	1.28641	0.00520617
Q9M0N1	Plant UBX domain-containing protein 10 OS=Arabidopsis thaliana GN=PUX10 PE=2 SV=1 - [PUX10_ARATH]	37.99	7.08	1	3	3	3	480	52.8	4.94	1.213	0.813	0.999	0.819	0.972	1.015	0.935333	1.00833	0.927603	0.604324
Q9FFS8	40S ribosomal protein S10-2 OS=Arabidopsis thaliana GN=RPS10B PE=2 SV=1 - [RS102_ARATH]	37.76	33.33	2	4	5	15	180	19.7	9.73	0.904	1.056	0.963	0.995	1.067	1.022	1.028	0.974333	1.05508	0.334706
Q94BT0	Sucrose-phosphate synthase 1 OS=Arabidopsis thaliana GN=SPS1 PE=1 SV=1 - [SPSA1_ARATH]	37.76	4.89	4	5	5	8	1043	117.2	6.43	0.987	1.017	0.95	1.099	0.913	0.895	0.969	0.984667	0.984089	0.829153
Q9FJJ7	Putative uncharacterized protein OS=Arabidopsis thaliana PE=4 SV=1 - [Q9FJJ7_ARATH]	37.76	24.44	2	2	2	2	135	15.4	4.5	0.916	0.94	0.893	1.056	1.143	1.156	1.11833	0.916333	1.22044	0.00411191
Q9SSA5	Peptidyl-prolyl cis-trans isomerase CYP38, chloroplastic OS=Arabidopsis thaliana GN=CYP38 PE=1 SV=1 - [CYP38_ARATH]	37.75	17.16	1	5	5	6	437	48	5.16	0.877	0.911	0.902	1.154	1.11	1.139	1.13433	0.896667	1.26506	0.000133044
Q9LFJ8	UDP-glycosyltransferase 78D2 OS=Arabidopsis thaliana GN=UGT78D2 PE=2 SV=1 - [U78D2_ARATH]	37.75	2.17	1	1	1	1	460	50.5	5.94	1.075	1.025	0.94	0.979	1.087	0.943	1.003	1.01333	0.989803	0.868423
F4K3X1	Ubiquitin carboxyl-terminal hydrolase 12 OS=Arabidopsis thaliana GN=UBP12 PE=3 SV=1 - [F4K3X1_ARATH]	37.75	10.56	2	3	8	9	985	115.1	5.68	1.084	0.974	0.986	0.964	1.045	1.001	1.00333	1.01467	0.98883	0.800516
Q9SAK2	Ent-kaur-16-ene synthase, chloroplastic OS=Arabidopsis thaliana GN=GA2 PE=1 SV=1 - [KSB_ARATH]	37.73	2.29	1	1	1	1	785	89.6	5.92	1.104	0.952	0.933	1.056	1.128	0.891	1.025	0.996333	1.02877	0.762475
Q9SUI6	Photosystem I reaction center subunit VI-2, chloroplastic OS=Arabidopsis thaliana GN=PSAH2 PE=2 SV=1 - [PSAH2_ARATH]	37.69	7.59	2	1	1	1	145	15.3	9.91	0.874	1.287	1.098	1.032	0.868	0.877	0.925667	1.08633	0.852102	0.286323
O82201	AP-4 complex subunit sigma OS=Arabidopsis thaliana GN=At2g19790 PE=1 SV=1 - [AP4S_ARATH]	37.69	13.29	1	2	2	2	143	16.9	5.76	1.062	1.156	1.082	0.877	0.929	0.866	0.890667	1.1	0.809697	0.00375218
Q9S756	Ferritin-4, chloroplastic OS=Arabidopsis thaliana GN=FER4 PE=2 SV=1 - [FRI4_ARATH]	37.67	6.18	1	1	1	1	259	29	6.62	0.968	0.965	0.993	1.146	0.925	1.089	1.05333	0.975333	1.07997	0.308016
Q4V3D3	Plant UBX domain-containing protein 9 OS=Arabidopsis thaliana GN=PUX9 PE=1 SV=1 - [PUX9_ARATH]	37.62	5.54	3	2	2	2	469	52.1	5.48	0.881	0.981	0.883	1.15	1.129	1.085	1.12133	0.915	1.2255	0.00566501
Q9LTB2	Methionine S-methyltransferase OS=Arabidopsis thaliana GN=MMT1 PE=1 SV=1 - [MMT1_ARATH]	37.6	3.92	2	3	3	3	1071	118.6	5.63	0.949	1.097	0.973	0.991	1.138	0.936	1.02167	1.00633	1.01524	0.849473
O22969	Uncharacterized protein At2g34160 OS=Arabidopsis thaliana GN=At2g34160 PE=1 SV=1 - [Y2416_ARATH]	37.59	10.77	2	1	2	5	130	14.6	5.36	1.06	1.148	1.073	0.842	0.979	0.893	0.904667	1.09367	0.827187	0.0175624
Q1G3V1	Uncharacterized protein OS=Arabidopsis thaliana GN=At1g12064 PE=4 SV=1 - [Q1G3V1_ARATH]	37.58	21.1	2	3	3	4	109	12	9.07	0.968	1.024	1.031	1.04	0.969	1.042	1.017	1.00767	1.00926	0.779765
Q9XGR4	Serine/threonine protein phosphatase 2A regulatory subunit B''alpha OS=Arabidopsis thaliana GN=B''ALPHA PE=1 SV=1 - [2AB2A_ARATH]	37.55	7.06	3	2	3	3	538	62.3	5.07	0.989	0.847	1.389	0.738	0.99	0.948	0.892	1.075	0.829767	0.36684
Q9LVW7	Carbamoyl-phosphate synthase small chain, chloroplastic OS=Arabidopsis thaliana GN=CARA PE=1 SV=1 - [CARA_ARATH]	37.5	10.23	2	4	4	4	430	47	6.02	0.908	1.013	0.916	1.079	1.103	1.052	1.078	0.945667	1.13994	0.0228806
F4HRK0	Hydroxyacylglutathione hydrolase 3 OS=Arabidopsis thaliana GN=GLY3 PE=1 SV=1 - [F4HRK0_ARATH]	37.49	6.46	2	2	2	4	294	32.3	7.01	0.877	0.87	0.952	1.171	1.255	0.963	1.12967	0.899667	1.25565	0.0642094
Q1PF50	Probable serine protease EDA2 OS=Arabidopsis thaliana GN=EDA2 PE=2 SV=2 - [EDA2_ARATH]	37.41	3.89	1	1	2	9	489	55.8	8.25	1.019	0.993	1.083	0.972	1.016	1.005	0.997667	1.03167	0.967044	0.318005
A8MQE0	D-glycerate 3-kinase OS=Arabidopsis thaliana GN=At1g80380 PE=4 SV=1 - [A8MQE0_ARATH]	37.38	7.97	4	2	2	2	364	40.8	5.66	0.985	0.902	0.963	1.144	0.948	1.085	1.059	0.95	1.11474	0.159367
Q9LHA1	Cytochrome P450 81D11 OS=Arabidopsis thaliana GN=CYP81D11 PE=2 SV=1 - [C8D11_ARATH]	37.38	2.36	1	1	1	1	509	57.7	8.9	0.623	0.609	0.552	1.314	1.875	1.385	1.52467	0.594667	2.5639	0.00636741
Q9CAK8	2-C-methyl-D-erythritol 2,4-cyclodiphosphate synthase, chloroplastic OS=Arabidopsis thaliana GN=ISPF PE=1 SV=1 - [ISPF_ARATH]	37.37	12.99	1	2	2	2	231	24.8	8.79	1.014	0.983	0.92	1.035	1.051	1.055	1.047	0.972333	1.07679	0.0577983
Q9SE96	GEM-like protein 1 OS=Arabidopsis thaliana GN=FIP1 PE=1 SV=1 - [GEML1_ARATH]	37.29	29.34	1	7	7	9	259	27.9	6.64	1.017	0.965	0.992	1.038	0.995	0.961	0.998	0.991333	1.00672	0.81624
Q9SRR9	F21O3.18 protein OS=Arabidopsis thaliana GN=F21O3.18 PE=4 SV=1 - [Q9SRR9_ARATH]	37.29	10.63	2	1	1	1	160	17.8	5.5	1.246	1.147	1.012	0.993	0.76	0.806	0.853	1.135	0.751542	0.0456098
O80763	Probable nucleoredoxin 1 OS=Arabidopsis thaliana GN=At1g60420 PE=1 SV=1 - [NRX1_ARATH]	37.24	14.88	1	6	6	6	578	65.1	5.01	1.006	1.062	1.049	0.995	0.996	0.927	0.972667	1.039	0.936157	0.0799083
O22875	Expressed protein OS=Arabidopsis thaliana GN=At2g40600 PE=4 SV=2 - [O22875_ARATH]	37.23	9.33	1	1	1	1	193	20.7	5.92	1.164	0.906	1.129	0.946	0.988	0.869	0.934333	1.06633	0.876211	0.207974
Q9LYJ9	DEAD-box ATP-dependent RNA helicase 46 OS=Arabidopsis thaliana GN=RH46 PE=2 SV=2 - [RH46_ARATH]	37.2	4.34	5	1	2	2	645	69.2	9.39	1.086	1.029	1.085	0.924	0.916	0.966	0.935333	1.06667	0.876875	0.00575657
Q8LDI5	Thioredoxin-like protein CXXS1 OS=Arabidopsis thaliana GN=CXXS1 PE=2 SV=2 - [CXXS1_ARATH]	37.17	21.19	1	2	2	2	118	13.3	5.48	0.953	0.947	0.945	1.126	1.08	1.011	1.07233	0.948333	1.13076	0.0208174
O81153	Proteasome subunit beta type-3-B OS=Arabidopsis thaliana GN=PBC2 PE=1 SV=1 - [PSB3B_ARATH]	37.15	20.1	2	3	3	6	204	22.7	5.9	0.948	1.023	0.909	1.089	1.049	1.103	1.08033	0.96	1.12535	0.0317234
Q9FIJ7	Adenylate kinase 2, chloroplastic OS=Arabidopsis thaliana GN=At5g47840 PE=1 SV=1 - [KAD2_ARATH]	37.11	4.95	1	1	1	1	283	31.4	7.61	1.035	0.924	1.069	1.082	0.971	0.977	1.01	1.00933	1.00066	0.991183
Q9SXE7	Bifunctional inhibitor/lipid-transfer protein/seed storage 2S albumin superfamily protein OS=Arabidopsis thaliana GN=At1g62500 PE=2 SV=1 - [Q9SXE7_ARATH]	37.06	3.37	1	1	1	5	297	29.7	9.51	1.149	1.281	1.17	0.797	0.898	0.713	0.802667	1.2	0.668889	0.00413188
Q84JH7	Sirohydrochlorin ferrochelatase, chloroplastic OS=Arabidopsis thaliana GN=SIRB PE=1 SV=1 - [SIRB_ARATH]	37.02	4.89	1	1	1	1	225	24.9	8.19	0.943	0.809	0.916	1.18	1.226	1.073	1.15967	0.889333	1.30397	0.011445
F4K015	Dynamin-related protein 1A OS=Arabidopsis thaliana GN=DL1 PE=1 SV=1 - [F4K015_ARATH]	36.96	14.57	4	8	9	11	604	67.5	8.15	1.03	0.974	1.043	0.989	0.977	0.998	0.988	1.01567	0.97276	0.277429
Q9SHF3	Protein argonaute 2 OS=Arabidopsis thaliana GN=AGO2 PE=1 SV=1 - [AGO2_ARATH]	36.93	5.13	1	4	4	4	1014	113.4	9.47	1.119	0.881	0.959	1.04	1.086	1.114	1.08	0.986333	1.09496	0.270405
Q9SYI5	Putative uncharacterized protein AT4g01870 OS=Arabidopsis thaliana GN=T7B11.13 PE=2 SV=1 - [Q9SYI5_ARATH]	36.93	9.97	2	5	5	7	652	72.8	5.99	0.871	0.908	0.91	1.114	1.115	1.19	1.13967	0.896333	1.27148	0.000989368
Q94AE4	AT5g43400/MWF20_9 OS=Arabidopsis thaliana GN=At5g43400 PE=2 SV=2 - [Q94AE4_ARATH]	36.93	3.21	3	2	2	2	655	74.6	6.35	1.095	1.086	1.112	0.773	0.898	1	0.890333	1.09767	0.811114	0.0349319
F4J300	Short-chain dehydrogenase reductase 5 OS=Arabidopsis thaliana GN=SDR5 PE=3 SV=1 - [SDR5_ARATH]	36.92	12.36	4	1	3	5	259	26.9	6.21	0.649	0.717	0.658	1.239	1.912	1.141	1.43067	0.674667	2.12055	0.035949
Q9LZI2	UDP-glucuronic acid decarboxylase 2 OS=Arabidopsis thaliana GN=UXS2 PE=1 SV=1 - [UXS2_ARATH]	36.88	8.99	4	3	4	4	445	49.9	9.14	0.947	0.982	1.022	1.118	1.062	1.013	1.06433	0.983667	1.08201	0.0964565
F4JD57	UV excision repair protein RAD23C OS=Arabidopsis thaliana GN=RAD23C PE=4 SV=1 - [F4JD57_ARATH]	36.88	9.09	3	1	4	4	418	44.1	4.83	0.951	0.795	0.994	1.03	1.146	1.192	1.12267	0.913333	1.2292	0.0536773
Q9SE33	Cysteine and histidine-rich domain-containing protein RAR1 OS=Arabidopsis thaliana GN=RAR1 PE=1 SV=1 - [RAR1_ARATH]	36.84	7.52	1	1	1	2	226	24.9	7.23	0.905	0.696	0.814	1.396	1.116	1.257	1.25633	0.805	1.56066	0.0110727
Q9SIE1	Bifunctional aspartate aminotransferase and glutamate/aspartate-prephenate aminotransferase OS=Arabidopsis thaliana GN=PAT PE=1 SV=2 - [PAT_ARATH]	36.78	5.68	1	2	2	3	475	51	7.9	0.952	1.004	1.094	1.158	0.89	0.948	0.998667	1.01667	0.982295	0.853424
Q9XI55	F9L1.8 protein OS=Arabidopsis thaliana GN=F9L1.8 PE=2 SV=1 - [Q9XI55_ARATH]	36.75	11.19	2	2	2	2	295	31.9	8	1.159	0.965	1.039	0.944	0.87	0.958	0.924	1.05433	0.876383	0.106472
Q94K58	Putative uncharacterized protein At1g29040 (Fragment) OS=Arabidopsis thaliana GN=At1g29040 PE=2 SV=2 - [Q94K58_ARATH]	36.75	9.64	4	2	2	2	197	21.3	8.09	1.057	1.046	1.096	0.971	0.908	0.911	0.93	1.06633	0.872148	0.00591388
Q8VZK2	Translation machinery-associated protein 22 OS=Arabidopsis thaliana GN=At5g11900 PE=2 SV=1 - [Q8VZK2_ARATH]	36.72	9.09	2	3	3	3	198	21.6	7.64	1.007	1.072	1.243	0.792	0.903	0.796	0.830333	1.10733	0.749849	0.0249674
Q38935	Peptidyl-prolyl cis-trans isomerase FKBP15-1 OS=Arabidopsis thaliana GN=FKBP15-1 PE=2 SV=2 - [FK151_ARATH]	36.7	20.92	1	2	3	6	153	16.3	8.37	0.758	0.833	0.759	1.459	1.196	1.14	1.265	0.783333	1.61489	0.00897767
Q9FMM0	Probable ubiquitin-conjugating enzyme E2 18 OS=Arabidopsis thaliana GN=UBC18 PE=2 SV=1 - [UBC18_ARATH]	36.69	8.7	1	1	1	1	161	18.4	8.18	0.954	0.874	1	1.089	1.045	1.137	1.09033	0.942667	1.15665	0.0312933
Q9LT41	RCD1 OS=Arabidopsis thaliana PE=4 SV=1 - [Q9LT41_ARATH]	36.69	5.86	3	1	1	1	307	33.8	7.36	0.913	1.272	1.205	0.858	0.906	0.837	0.867	1.13	0.767257	0.0788242
[truncated: 1,319 more rows]
