# Supplementary material for: Arabidopsis MDN1 Is Involved in the Establishment of a Normal Seed Proteome and Seed Germination
Source: Front Plant Sci. 2019 Sep 10;10:1118. doi: 10.3389/fpls.2019.01118 (PMC6746975; doi:10.3389/fpls.2019.01118)
Supplement: Supplementary file 6 [file Table_3.xlsx]

## Sheet: Sheet1
Supplementary Dataset S3. The list of MDN1-dependent DAPs in seeds.
Acctssion, protein accession number from Uniprot.
Description, protein description from Uniprot.
Score, protein score derived from weighted peptide scores.
Coverage, protein sequence coverage %.
calc. pI, pI value of the protien
Accession	Description	Score	Coverage	# Proteins	# Unique Peptides	# Peptides	# PSMs	# AAs	MW [kDa]	calc. pI	wt_rep1	wt_rep2	wt_rep3	mdn1-1_rep1	mdn1-1_rep2	mdn1-1_rep3	Group_mdn1-1.average	Group_wt.average	Group_mdn1-1.vs.Group_wt.FC	pvalue
O49711	Pentatricopeptide repeat-containing protein At4g21880, mitochondrial OS=Arabidopsis thaliana GN=At4g21880 PE=3 SV=2 - [PP335_ARATH]	0	4.15	1	1	1	1	843	94.7	6.39	0.247	0.478	0.255	1.852	2.252	1.52	1.87467	0.326667	5.73878	0.0023289
Q9FJ31	RNI-like superfamily protein OS=Arabidopsis thaliana GN=At5g41830 PE=4 SV=1 - [Q9FJ31_ARATH]	0	6.05	1	1	1	4	463	53.5	6.46	0.357	0.507	0.395	1.602	2.148	1.518	1.756	0.419667	4.18427	0.00273501
Q9LW20	Probable inactive shikimate kinase like 1, chloroplastic OS=Arabidopsis thaliana GN=SKL1 PE=2 SV=1 - [SKL1_ARATH]	0	8.57	1	1	1	1	280	30.5	5.16	0.375	0.544	NA	0.36	4.717	0.558	1.87833	0.4595	4.08778	0.495718
Q8LC54	Putative uncharacterized protein OS=Arabidopsis thaliana PE=2 SV=1 - [Q8LC54_ARATH]	0	7.33	2	1	1	2	150	17	9.01	0.505	0.406	0.415	0.734	0.751	3.445	1.64333	0.442	3.71795	0.253466
Q9LW52	Uncharacterized protein OS=Arabidopsis thaliana GN=At3g23450 PE=4 SV=1 - [Q9LW52_ARATH]	35.36	35.4	2	1	1	1	452	34.8	10.81	0.436	0.501	0.518	1.488	1.932	1.574	1.66467	0.485	3.4323	0.00103461
Q2V3T1	Self-incompatibility S1 family protein OS=Arabidopsis thaliana GN=At3g24068 PE=4 SV=1 - [Q2V3T1_ARATH]	0	15.79	1	1	1	1	133	14.9	8.98	0.446	0.602	0.491	1.706	1.368	1.822	1.632	0.513	3.18129	0.00147278
Q9FJS3	Glycine-rich protein OS=Arabidopsis thaliana GN=At5g35660 PE=4 SV=1 - [Q9FJS3_ARATH]	845.56	47.52	1	7	7	78	343	31.6	7.77	0.525	0.541	0.562	1.501	1.745	1.422	1.556	0.542667	2.86732	0.000489804
Q9ZPW9	Non-specific lipid-transfer protein 8 OS=Arabidopsis thaliana GN=LTP8 PE=3 SV=1 - [NLTP8_ARATH]	114.27	50	1	4	4	18	116	11.8	5.25	0.545	0.562	0.627	1.457	1.786	1.447	1.56333	0.578	2.70473	0.000990089
Q9SVK8	Putative uncharacterized protein F18B3.190 OS=Arabidopsis thaliana GN=F18B3.190 PE=4 SV=1 - [Q9SVK8_ARATH]	0	2.59	2	1	1	1	424	47.1	4.94	0.629	0.46	0.675	1.874	1.171	1.581	1.542	0.588	2.62245	0.0111951
Q9LN65	F18O14.5 OS=Arabidopsis thaliana GN=At1g19330 PE=4 SV=1 - [Q9LN65_ARATH]	21.09	3.72	3	1	1	1	242	26.9	7.91	0.578	0.591	0.593	1.53	1.627	1.459	1.53867	0.587333	2.61975	4.12e-05
Q93XY8	Putative uncharacterized protein At3g29180; MUO22.2 OS=Arabidopsis thaliana GN=At3g29180/MUO22.2 PE=2 SV=1 - [Q93XY8_ARATH]	0	1.95	2	1	1	1	513	57.6	9	0.534	0.637	0.602	1.506	1.635	1.467	1.536	0.591	2.59898	8.94e-05
Q9LHA1	Cytochrome P450 81D11 OS=Arabidopsis thaliana GN=CYP81D11 PE=2 SV=1 - [C8D11_ARATH]	37.38	2.36	1	1	1	1	509	57.7	8.9	0.623	0.609	0.552	1.314	1.875	1.385	1.52467	0.594667	2.5639	0.00636741
Q9S7G7	Myb-related protein 3R-1 OS=Arabidopsis thaliana GN=MYB3R-1 PE=2 SV=1 - [MB3R1_ARATH]	0	2.19	2	1	1	1	776	86.5	5.68	0.543	0.655	0.597	1.549	1.658	1.382	1.52967	0.598333	2.55655	0.000422459
Q9SL09	Glycine-rich protein OS=Arabidopsis thaliana GN=At2g05580 PE=4 SV=1 - [Q9SL09_ARATH]	419.77	57.28	2	8	8	50	302	26	9.91	0.561	0.623	0.615	1.402	1.77	1.328	1.5	0.599667	2.50139	0.00285506
B5X0I6	Protein CTR9 homolog OS=Arabidopsis thaliana GN=VIP6 PE=1 SV=1 - [VIP6_ARATH]	0	0.55	1	1	1	1	1091	124	5.33	0.556	0.661	0.634	1.501	1.546	1.464	1.50367	0.617	2.43706	2.31e-05
O49432	Polygalacturonase QRT3 OS=Arabidopsis thaliana GN=QRT3 PE=2 SV=1 - [QRT3_ARATH]	0	2.91	1	1	1	1	481	51.6	6.02	0.645	0.574	0.652	2.13	0.675	1.702	1.50233	0.623667	2.40887	0.111974
Q9C787	Putative uncharacterized protein At1g69510 OS=Arabidopsis thaliana GN=F10D13_16 PE=1 SV=1 - [Q9C787_ARATH]	50.61	8.76	1	1	1	1	137	15.1	5.06	0.586	0.658	0.614	1.254	1.479	1.73	1.48767	0.619333	2.40205	0.00335309
Q9LMU2	At1g17860/F2H15_8 OS=Arabidopsis thaliana GN=F2H15.9 PE=2 SV=1 - [Q9LMU2_ARATH]	128.98	48.47	1	8	8	21	196	22.1	8.78	0.622	0.578	0.652	1.463	1.592	1.392	1.48233	0.617333	2.40119	0.00015659
Q94JQ7	At1g07830/F24B9_7 OS=Arabidopsis thaliana GN=At1g07830 PE=2 SV=1 - [Q94JQ7_ARATH]	0	9.72	2	1	1	1	144	16.9	10.05	0.683	0.547	0.637	1.427	1.684	1.365	1.492	0.622333	2.39743	0.00118138
Q9FG31	Late embryogenesis abundant protein 4-5 OS=Arabidopsis thaliana GN=LEA4-5 PE=2 SV=1 - [Q9FG31_ARATH]	418.15	46.2	3	7	7	60	158	16.2	9.44	0.606	0.613	0.646	1.458	1.577	1.406	1.48033	0.621667	2.38123	7.93e-05
Q9C8D8	Eukaryotic translation initiation factor 3 subunit J OS=Arabidopsis thaliana GN=F15E12.10 PE=2 SV=1 - [Q9C8D8_ARATH]	33.31	12.39	1	2	2	2	226	25.5	4.92	0.588	0.608	0.589	0.719	0.774	2.741	1.41133	0.595	2.37199	0.286944
Q84JB8	Protein root UVB sensitive 3 OS=Arabidopsis thaliana GN=RUS3 PE=2 SV=1 - [RUS3_ARATH]	0	2.5	1	1	1	1	440	48.6	9.16	0.582	0.572	0.738	1.267	2.061	1.13	1.486	0.630667	2.35624	0.0442047
P42758	Dehydrin Xero 2 OS=Arabidopsis thaliana GN=XERO2 PE=2 SV=1 - [XERO2_ARATH]	68.46	46.11	2	5	6	21	193	20.9	9.38	0.616	0.655	0.63	1.497	1.66	1.309	1.48867	0.633667	2.34929	0.00111015
P30224	Defensin-like protein 13 OS=Arabidopsis thaliana GN=PDF1.1 PE=1 SV=3 - [DEF13_ARATH]	145.94	58.75	5	5	5	34	80	8.7	8.13	0.628	0.541	0.643	1.391	1.512	1.347	1.41667	0.604	2.34547	0.000157684
Q8S8R1	Expressed protein OS=Arabidopsis thaliana GN=At2g23120 PE=2 SV=1 - [Q8S8R1_ARATH]	170.95	81.93	2	3	3	12	83	8.5	4.61	0.586	0.679	0.65	1.411	1.692	1.347	1.48333	0.638333	2.32376	0.00151588
P34893	10 kDa chaperonin OS=Arabidopsis thaliana GN=CPN10 PE=3 SV=1 - [CH10_ARATH]	70.4	64.29	1	6	6	19	98	10.8	7.42	0.653	0.592	0.697	1.482	1.608	1.42	1.50333	0.647333	2.32235	0.000171285
Q9SJ17	At2g21820 OS=Arabidopsis thaliana GN=At2g21820 PE=2 SV=1 - [Q9SJ17_ARATH]	462.06	75.64	1	9	9	42	78	8	4.81	0.639	0.631	0.63	1.43	1.595	1.372	1.46567	0.633333	2.31421	0.000239423
Q96270	At1g52690/F6D8_9 OS=Arabidopsis thaliana GN=F6D8.9 PE=2 SV=1 - [Q96270_ARATH]	1379.63	73.96	3	15	15	163	169	18.1	7.61	0.619	0.602	0.654	1.433	1.495	1.374	1.434	0.625	2.2944	2.92e-05
Q84W11	At5g04750 OS=Arabidopsis thaliana GN=At5g04750 PE=2 SV=1 - [Q84W11_ARATH]	23.67	14.89	4	1	2	6	94	10.7	9.99	0.7	0.601	0.635	1.494	1.617	1.33	1.48033	0.645333	2.2939	0.000690158
Q9M7T0	Peroxiredoxin-2F, mitochondrial OS=Arabidopsis thaliana GN=PRXIIF PE=1 SV=2 - [PRX2F_ARATH]	635.28	48.76	2	10	10	44	201	21.4	8.9	0.646	0.634	0.652	1.382	1.603	1.36	1.44833	0.644	2.24896	0.000493339
Q9SD87	Dentin sialophosphoprotein-like protein OS=Arabidopsis thaliana GN=F13G24.170 PE=2 SV=1 - [Q9SD87_ARATH]	0	3.74	1	1	1	1	1097	121	6.3	0.586	0.747	0.626	1.509	1.474	1.4	1.461	0.653	2.23737	0.000154934
Q570W8	Putative uncharacterized protein At2g44525 OS=Arabidopsis thaliana GN=At2g44525 PE=2 SV=1 - [Q570W8_ARATH]	0	8.5	3	1	1	1	153	17.1	6.55	0.592	0.617	0.714	0.834	0.67	2.779	1.42767	0.641	2.22725	0.310683
Q8RYE7	Defensin-like protein 196 OS=Arabidopsis thaliana GN=ATTI4 PE=3 SV=1 - [DF196_ARATH]	55.57	30.93	1	3	3	9	97	10.7	5.38	0.635	0.658	0.665	1.467	1.516	1.367	1.45	0.652667	2.22165	5.84e-05
Q9M892	AT3g02480/F16B3_11 OS=Arabidopsis thaliana GN=F16B3.11 PE=2 SV=1 - [Q9M892_ARATH]	1389.36	88.24	1	9	9	113	68	7.1	9.04	0.618	0.649	0.668	1.414	1.51	1.372	1.432	0.645	2.22016	5.42e-05
Q9LSR4	Uncharacterized protein OS=Arabidopsis thaliana GN=At5g54410 PE=4 SV=1 - [Q9LSR4_ARATH]	0	2.74	1	1	1	1	219	25.5	6.3	0.613	0.685	0.67	1.372	1.603	1.383	1.45267	0.656	2.21443	0.000527267
Q02973	Em-like protein GEA6 OS=Arabidopsis thaliana GN=EM6 PE=2 SV=1 - [EM6_ARATH]	608.51	42.39	3	5	5	120	92	9.9	7.42	0.642	0.626	0.682	1.414	1.507	1.382	1.43433	0.65	2.20667	4.41e-05
Q9LF88	Late embryogenesis abundant protein-like OS=Arabidopsis thaliana GN=F8J2_210 PE=2 SV=1 - [Q9LF88_ARATH]	1277.46	57.2	2	33	36	174	479	52.1	5.39	0.642	0.641	0.682	1.391	1.639	1.306	1.44533	0.655	2.20662	0.00142923
Q39129	Thiosulfate sulfurtransferase 16, chloroplastic OS=Arabidopsis thaliana GN=STR16 PE=1 SV=2 - [STR16_ARATH]	108.72	66.67	2	5	5	8	120	12.7	7.03	0.658	0.647	0.641	1.44	1.567	1.278	1.42833	0.648667	2.20195	0.00074189
Q6ID29	At4g13860 OS=Arabidopsis thaliana GN=At4g13860 PE=2 SV=1 - [Q6ID29_ARATH]	0	32.18	2	1	1	2	87	9.5	4.97	0.732	0.522	0.722	1.466	1.49	1.381	1.44567	0.658667	2.19484	0.000490095
Q9SUB2	Late embryogenesis abundant protein (LEA) family protein OS=Arabidopsis thaliana GN=T13K14.180 PE=2 SV=1 - [Q9SUB2_ARATH]	612.15	63.16	1	25	25	151	266	29.4	7.9	0.648	0.686	0.657	1.363	1.701	1.296	1.45333	0.663667	2.18985	0.0032939
Q39138	LEA protein Le25 homolog OS=Arabidopsis thaliana GN=T9G5.2 PE=2 SV=1 - [Q39138_ARATH]	159.5	20.9	2	2	3	19	134	14.9	8.94	0.663	0.63	0.657	1.438	1.477	1.35	1.42167	0.65	2.18718	3.81e-05
Q9FH31	2S seed storage protein 5 OS=Arabidopsis thaliana GN=SESA5 PE=1 SV=1 - [2SS5_ARATH]	986.6	50.91	1	9	9	229	165	18.9	7.59	0.666	0.622	0.676	1.402	1.476	1.387	1.42167	0.654667	2.17159	1.82e-05
Q9SK39	Probable steroid-binding protein 3 OS=Arabidopsis thaliana GN=MP3 PE=1 SV=1 - [SBP3_ARATH]	236.51	78	1	6	6	17	100	11	4.88	0.642	0.704	0.682	1.374	1.67	1.321	1.455	0.676	2.15237	0.00210505
Q9FJW4	NADH dehydrogenase [ubiquinone] iron-sulfur protein 4, mitochondrial OS=Arabidopsis thaliana GN=FRO1 PE=2 SV=1 - [NDUS4_ARATH]	60.42	34.42	1	4	4	5	154	17.1	9.64	0.666	0.711	0.646	1.379	1.666	1.292	1.44567	0.674333	2.14385	0.00253979
Q8RXF7	Putative uncharacterized protein At5g61820 OS=Arabidopsis thaliana GN=At5g61820 PE=2 SV=1 - [Q8RXF7_ARATH]	47.6	6.74	3	2	2	3	475	53.1	6.43	0.822	0.545	0.634	1.317	1.472	1.491	1.42667	0.667	2.13893	0.00152161
Q9CA23	Ubiquitin-fold modifier 1 OS=Arabidopsis thaliana GN=At1g77710 PE=3 SV=1 - [UFM1_ARATH]	53.2	32.26	1	3	3	10	93	9.9	9.25	0.656	0.664	0.677	1.45	1.463	1.355	1.42267	0.665667	2.13721	2.58e-05
Q42287	Methionine aminopeptidase (Fragment) OS=Arabidopsis thaliana PE=2 SV=1 - [Q42287_ARATH]	0	37.5	2	1	1	1	56	6.2	5.91	0.729	0.687	0.596	1.375	1.467	1.447	1.42967	0.670667	2.13171	9.49e-05
Q570U4	AT5G53895 protein OS=Arabidopsis thaliana GN=At5g53895 PE=2 SV=1 - [Q570U4_ARATH]	157.32	69.51	2	3	3	9	82	8.4	4.63	0.651	0.687	0.667	1.434	1.514	1.306	1.418	0.668333	2.1217	0.000259379
F4J300	Short-chain dehydrogenase reductase 5 OS=Arabidopsis thaliana GN=SDR5 PE=3 SV=1 - [SDR5_ARATH]	36.92	12.36	4	1	3	5	259	26.9	6.21	0.649	0.717	0.658	1.239	1.912	1.141	1.43067	0.674667	2.12055	0.035949
Q9FMI6	Putative uncharacterized protein OS=Arabidopsis thaliana PE=4 SV=1 - [Q9FMI6_ARATH]	0	27.27	3	2	2	2	77	8.2	9.16	0.65	0.717	0.665	1.35	1.507	1.41	1.42233	0.677333	2.0999	0.000118555
Q84JV0	Proline-rich extensin-like family protein OS=Arabidopsis thaliana GN=At5g59170 PE=2 SV=1 - [Q84JV0_ARATH]	0	36.11	3	8	8	40	288	33.4	9.54	0.668	0.668	0.681	1.405	1.503	1.322	1.41	0.672333	2.09717	0.000148754
Q39168	UPF0540 protein At1g62000 OS=Arabidopsis thaliana GN=At1g62000 PE=2 SV=1 - [U540A_ARATH]	122.09	27.03	1	2	2	3	148	14.9	10.43	0.636	0.674	0.691	1.402	1.383	1.405	1.39667	0.667	2.09395	2.05e-06
Q8H0U3	Armadillo/beta-catenin-like repeat-containing protein OS=Arabidopsis thaliana GN=At1g23180 PE=2 SV=1 - [Q8H0U3_ARATH]	0	2.88	2	1	1	1	834	91.6	5.43	0.636	0.711	0.688	1.21	1.598	1.451	1.41967	0.678333	2.09287	0.00300438
P46688	Gibberellin-regulated protein 2 OS=Arabidopsis thaliana GN=GASA2 PE=2 SV=1 - [GASA2_ARATH]	34.99	7.07	1	1	1	5	99	10.5	8.56	0.65	0.688	0.716	1.387	1.557	1.35	1.43133	0.684667	2.09056	0.000359241
Q9LU86	Peroxiredoxin Q, chloroplastic OS=Arabidopsis thaliana GN=PRXQ PE=1 SV=1 - [PRXQ_ARATH]	511.05	53.7	2	11	11	70	216	23.7	9.51	0.66	0.679	0.712	1.353	1.625	1.297	1.425	0.683667	2.08435	0.00193408
P15459	2S seed storage protein 3 OS=Arabidopsis thaliana GN=AT2S3 PE=1 SV=1 - [2SS3_ARATH]	3182.74	75	1	6	12	671	164	18.8	7.8	0.632	0.669	0.687	1.404	1.42	1.311	1.37833	0.662667	2.07998	4.51e-05
Q9FM47	RNA-binding (RRM/RBD/RNP motifs) family protein OS=Arabidopsis thaliana GN=At5g40490 PE=2 SV=1 - [Q9FM47_ARATH]	32	3.55	1	1	1	1	423	42.4	6.47	0.628	0.69	0.721	1.092	1.508	1.632	1.41067	0.679667	2.07553	0.011557
Q8GXS3	Pre-mRNA cleavage factor Im 25 kDa subunit 2 OS=Arabidopsis thaliana GN=CFIS2 PE=1 SV=1 - [CFIS2_ARATH]	86.15	18	1	3	3	5	200	22.8	9.11	0.621	0.79	0.688	1.437	1.448	1.441	1.442	0.699667	2.06098	0.00011281
Q42406	Peptidyl-prolyl cis-trans isomerase CYP18-4 OS=Arabidopsis thaliana GN=CYP18-4 PE=1 SV=1 - [CP18D_ARATH]	638.31	90.7	4	11	15	81	172	18.4	8.69	0.643	0.678	0.719	1.379	1.56	1.257	1.39867	0.68	2.05686	0.00137415
Q9ZRT9	LEA OS=Arabidopsis thaliana GN=lea32 PE=2 SV=1 - [Q9ZRT9_ARATH]	1620.45	67.25	3	29	29	233	287	31.3	5.3	0.659	0.707	0.694	1.363	1.608	1.262	1.411	0.686667	2.05485	0.00221152
Q07187	Em-like protein GEA1 OS=Arabidopsis thaliana GN=EM1 PE=2 SV=1 - [EM1_ARATH]	1005.79	78.95	2	14	14	158	152	16.6	6.1	0.666	0.668	0.711	1.373	1.564	1.253	1.39667	0.681667	2.0489	0.00146175
F4K6F8	Uncharacterized protein OS=Arabidopsis thaliana GN=At5g62270 PE=4 SV=1 - [F4K6F8_ARATH]	0	1.83	2	1	1	1	383	43.9	6.92	0.8	0.636	0.619	1.294	1.247	1.665	1.402	0.685	2.04672	0.00764766
O82387	Cell division control protein 6 homolog OS=Arabidopsis thaliana GN=CDC6 PE=2 SV=2 - [CDC6A_ARATH]	0	6.12	1	1	1	1	539	59.8	9.06	0.709	0.808	0.555	1.36	1.405	1.454	1.40633	0.690667	2.0362	0.000801185
Q9SFV3	At3g07230 OS=Arabidopsis thaliana GN=T1B9.10 PE=2 SV=1 - [Q9SFV3_ARATH]	27.91	73.91	1	4	4	10	46	5.3	9.52	0.65	0.707	0.704	1.359	1.557	1.28	1.39867	0.687	2.0359	0.00108537
Q9SXZ2	Protein FLOWERING LOCUS T OS=Arabidopsis thaliana GN=FT PE=1 SV=2 - [FT_ARATH]	0	6.29	1	1	1	1	175	19.8	7.9	0.652	0.705	0.72	1.377	1.164	1.662	1.401	0.692333	2.02359	0.00826157
F4K0K7	Dehydrin Rab18 OS=Arabidopsis thaliana GN=RAB18 PE=3 SV=1 - [F4K0K7_ARATH]	922.16	36.76	2	5	5	58	185	18.3	8.31	0.658	0.698	0.671	1.344	1.472	1.281	1.36567	0.675667	2.02121	0.000274792
P15457	2S seed storage protein 1 OS=Arabidopsis thaliana GN=AT2S1 PE=1 SV=1 - [2SS1_ARATH]	812.36	40.85	2	7	7	313	164	19	5.91	0.691	0.646	0.702	1.355	1.409	1.343	1.369	0.679667	2.01422	1.31e-05
Q9LPZ3	G-type lectin S-receptor-like serine/threonine-protein kinase At1g11410 OS=Arabidopsis thaliana GN=At1g11410 PE=3 SV=3 - [Y1141_ARATH]	0	1.42	1	1	1	1	845	95.8	7.97	0.849	0.813	0.43	1.262	1.902	1.036	1.4	0.697333	2.00765	0.0738068
P15460	2S seed storage protein 4 OS=Arabidopsis thaliana GN=AT2S4 PE=2 SV=1 - [2SS4_ARATH]	1216.2	64.46	1	13	15	486	166	19.2	7.5	0.69	0.646	0.715	1.345	1.425	1.339	1.36967	0.683667	2.00341	3.68e-05
Q8RY15	ARM repeat superfamily protein OS=Arabidopsis thaliana GN=At4g25580 PE=2 SV=1 - [Q8RY15_ARATH]	609.21	62.3	3	35	35	95	626	66.5	6.68	0.684	0.686	0.719	1.355	1.491	1.328	1.39133	0.696333	1.99809	0.000177141
P19171	Basic endochitinase B OS=Arabidopsis thaliana GN=CHI-B PE=1 SV=3 - [CHIB_ARATH]	55.02	6.57	1	1	1	1	335	36.2	7.61	0.781	0.582	0.734	1.376	1.54	1.271	1.39567	0.699	1.99666	0.00212136
P25863	Dehydrin Xero 1 OS=Arabidopsis thaliana GN=XERO1 PE=2 SV=2 - [XERO1_ARATH]	65.33	21.88	1	1	2	12	128	13.4	9.2	0.684	0.717	0.716	1.441	1.471	1.292	1.40133	0.705667	1.98583	0.000248227
Q96261	Probable dehydrin LEA OS=Arabidopsis thaliana GN=LEA PE=2 SV=1 - [DHLEA_ARATH]	48.01	44.32	15	3	4	14	185	19.3	6.9	0.734	0.666	0.701	1.338	1.607	1.221	1.38867	0.700333	1.98287	0.00403641
Q9XI42	F9L1.21 protein OS=Arabidopsis thaliana GN=F9L1.21 PE=2 SV=1 - [Q9XI42_ARATH]	66.63	32.81	4	2	2	3	64	7	9.95	0.668	0.709	0.736	1.335	1.55	1.294	1.393	0.704333	1.97776	0.00109038
Q42335	MIF homologue (Fragment) OS=Arabidopsis thaliana PE=2 SV=1 - [Q42335_ARATH]	52.92	22.81	4	2	2	5	114	12	6.62	0.722	0.635	0.742	1.357	1.532	1.255	1.38133	0.699667	1.97427	0.00145151
Q9FL02	AT5g66780/MUD21_2 OS=Arabidopsis thaliana GN=At5g66780 PE=2 SV=1 - [Q9FL02_ARATH]	195.42	51.24	1	5	5	30	121	13.4	6.93	0.662	0.708	0.739	1.323	1.48	1.329	1.37733	0.703	1.95922	0.000273123
Q9SDY5	NEDD8-conjugating enzyme Ubc12 OS=Arabidopsis thaliana GN=RCE1 PE=1 SV=1 - [RCE1_ARATH]	0	7.61	1	1	1	1	184	20.8	7.84	0.802	0.707	0.622	1.467	1.341	1.341	1.383	0.710333	1.94697	0.000548133
Q9FMJ9	At5g63240 OS=Arabidopsis thaliana GN=At5g63240 PE=2 SV=1 - [Q9FMJ9_ARATH]	0	27.91	1	2	2	4	129	14	5.36	0.68	0.745	0.698	1.256	1.664	1.205	1.375	0.707667	1.94301	0.0103853
Q9S7X2	Putative uncharacterized protein F24J13.12 OS=Arabidopsis thaliana GN=F5A18.27 PE=4 SV=1 - [Q9S7X2_ARATH]	0	2.44	3	1	1	1	410	45.9	8.47	0.671	0.755	0.722	1.36	1.54	1.242	1.38067	0.716	1.92831	0.00179398
Q94K85	Cathepsin B-like cysteine protease OS=Arabidopsis thaliana GN=T15B16.17a:T15B16.17b PE=2 SV=1 - [Q94K85_ARATH]	38.95	6.13	2	1	1	1	359	39.4	6.18	0.707	0.776	0.657	1.236	1.432	1.458	1.37533	0.713333	1.92804	0.00106194
Q9LW12	AT3g15670/MSJ11_7 OS=Arabidopsis thaliana GN=At3g15670 PE=2 SV=1 - [Q9LW12_ARATH]	2931.49	72.89	4	18	18	436	225	24.2	8.85	0.683	0.699	0.735	1.379	1.414	1.283	1.35867	0.705667	1.92537	0.00010057
P57752	Acyl-CoA-binding domain-containing protein 6 OS=Arabidopsis thaliana GN=ACBP6 PE=1 SV=1 - [ACBP6_ARATH]	314.04	75	1	6	6	34	92	10.4	5.24	0.726	0.704	0.694	1.369	1.469	1.251	1.363	0.708	1.92514	0.000504716
Q8VZT0	Putative H/ACA ribonucleoprotein complex subunit 1-like protein 1 OS=Arabidopsis thaliana GN=At3g03920 PE=2 SV=1 - [NLAL1_ARATH]	69.03	25.25	2	4	4	12	202	21	11.41	0.695	0.718	0.701	1.282	1.481	1.269	1.344	0.704667	1.90728	0.000752273
Q94EG6	Uncharacterized protein At5g02240 OS=Arabidopsis thaliana GN=At5g02240 PE=1 SV=1 - [Y5224_ARATH]	625.24	72.33	1	15	18	77	253	27.1	6.62	0.699	0.698	0.746	1.309	1.532	1.246	1.36233	0.714333	1.90714	0.00182724
F4KDZ4	Malate dehydrogenase OS=Arabidopsis thaliana GN=PMDH2 PE=3 SV=1 - [F4KDZ4_ARATH]	0	5.71	5	1	1	1	333	35	7.66	0.854	0.633	0.643	0.837	1.356	1.868	1.35367	0.71	1.90657	0.103427
Q9LDN8	AT3g15280/K7L4_8 OS=Arabidopsis thaliana GN=At3g15280 PE=2 SV=1 - [Q9LDN8_ARATH]	277.44	42	1	8	8	30	150	16.1	5.25	0.728	0.734	0.713	1.307	1.58	1.256	1.381	0.725	1.90483	0.00287451
F4ILI2	Plant EC metallothionein-like protein, family 15 OS=Arabidopsis thaliana GN=At2g23240 PE=4 SV=1 - [F4ILI2_ARATH]	80.07	26.19	4	2	2	8	84	8.3	5.21	0.677	0.736	0.748	1.403	1.339	1.374	1.372	0.720333	1.90467	2.23e-05
O23593	AT4g17520/dl4795w OS=Arabidopsis thaliana GN=dl4795w PE=1 SV=1 - [O23593_ARATH]	107.87	27.5	2	4	7	20	360	38.9	8.75	0.728	0.709	0.707	1.301	1.435	1.345	1.36033	0.714667	1.90345	8.62e-05
O23018	Glycine-rich protein OS=Arabidopsis thaliana GN=T1G11.8 PE=2 SV=1 - [O23018_ARATH]	392.36	23.58	2	2	2	9	212	18.3	8.68	0.692	0.708	0.737	1.317	1.424	1.32	1.35367	0.712333	1.90033	6.9e-05
Q6NPF9	Thioredoxin Y1, chloroplastic OS=Arabidopsis thaliana GN=At1g76760 PE=2 SV=1 - [TRXY1_ARATH]	44.42	7.56	1	2	2	5	172	19.2	8.85	0.672	0.636	0.816	1.339	1.532	1.159	1.34333	0.708	1.89736	0.00628025
Q0WR93	Putative uncharacterized protein OS=Arabidopsis thaliana PE=2 SV=1 - [Q0WR93_ARATH]	0	58.97	1	1	1	1	39	4.4	10.27	0.708	0.71	0.751	1.201	1.757	1.146	1.368	0.723	1.89212	0.0300258
F4JCZ8	Uncharacterized protein OS=Arabidopsis thaliana GN=At3g60810 PE=4 SV=1 - [F4JCZ8_ARATH]	0	4.31	2	1	1	1	209	23.9	9.64	0.722	0.771	0.68	1.389	1.43	1.288	1.369	0.724333	1.89001	0.000204081
O23020	At1g04645 OS=Arabidopsis thaliana GN=T1G11.10 PE=2 SV=1 - [O23020_ARATH]	0	7.03	3	1	1	1	128	14.9	8.18	0.741	0.608	0.814	1.236	1.365	1.486	1.36233	0.721	1.88951	0.00241831
Q9FWY8	Putative uncharacterized protein At1g02700 OS=Arabidopsis thaliana GN=T14P4.2 PE=2 SV=1 - [Q9FWY8_ARATH]	243.02	61.13	1	10	10	30	247	27.4	5.34	0.731	0.714	0.712	1.286	1.494	1.29	1.35667	0.719	1.88688	0.000759566
C0Z3D9	AT3G10620 protein OS=Arabidopsis thaliana GN=At3g10620 PE=2 SV=1 - [C0Z3D9_ARATH]	0	8.8	2	1	1	1	125	14.3	4.88	0.737	0.739	0.652	0.548	0.679	2.771	1.33267	0.709333	1.87876	0.435899
O82326	Expressed protein OS=Arabidopsis thaliana GN=At2g14880 PE=1 SV=1 - [O82326_ARATH]	123.11	51.06	3	3	8	20	141	15.9	9.86	0.704	0.652	0.764	1.348	1.195	1.436	1.32633	0.706667	1.87689	0.0013259
P42815	Ribonuclease 3 OS=Arabidopsis thaliana GN=RNS3 PE=2 SV=1 - [RNS3_ARATH]	0	4.5	1	1	1	1	222	25.6	6.14	0.803	0.661	0.704	1.122	1.263	1.671	1.352	0.722667	1.87085	0.0207583
Q41967	Mitochondrial fusion target protein (Fragment) OS=Arabidopsis thaliana PE=2 SV=1 - [Q41967_ARATH]	45.88	30	1	1	4	12	70	7.6	10.86	0.774	0.667	0.74	1.179	1.735	1.166	1.36	0.727	1.8707	0.0291462
Q9FG86	At5g43770 OS=Arabidopsis thaliana GN=At5g43770 PE=2 SV=1 - [Q9FG86_ARATH]	0	9.09	1	2	2	2	187	19.7	4.79	0.703	0.716	0.758	1.293	1.384	1.391	1.356	0.725667	1.86863	6.02e-05
P94014	Germin-like protein subfamily 2 member 1 OS=Arabidopsis thaliana GN=GLP4 PE=2 SV=2 - [GL21_ARATH]	40.54	18.26	3	4	4	10	219	22.9	8.44	0.732	0.731	0.75	1.347	1.52	1.261	1.376	0.737667	1.86534	0.00112245
Q9T077	At4g27530 OS=Arabidopsis thaliana GN=At4g27530 PE=2 SV=1 - [Q9T077_ARATH]	77.46	16.92	1	3	3	12	130	13.5	5.53	0.722	0.726	0.73	1.31	1.437	1.304	1.35033	0.726	1.85996	0.000136062
Q9M9M9	Probable NADH dehydrogenase [ubiquinone] 1 alpha subcomplex subunit 12 OS=Arabidopsis thaliana GN=At3g03100 PE=1 SV=1 - [NDUAC_ARATH]	62.98	42.14	4	7	7	15	159	18.3	9.23	0.721	0.742	0.711	1.288	1.423	1.326	1.34567	0.724667	1.85695	0.000113101
Q8LD49	Thioredoxin X, chloroplastic OS=Arabidopsis thaliana GN=ATHX PE=2 SV=2 - [TRXX_ARATH]	0	8.79	1	1	1	1	182	19.6	8.88	0.651	0.778	0.768	1.311	1.469	1.297	1.359	0.732333	1.85571	0.000796035
P48422	Cytochrome P450 86A1 OS=Arabidopsis thaliana GN=CYP86A1 PE=1 SV=2 - [C86A1_ARATH]	0	3.9	7	1	2	5	513	58.5	8.69	0.762	0.695	0.738	1.359	1.484	1.219	1.354	0.731667	1.85057	0.00140438
Q9FKI4	Peptide alpha-N-acetyltransferase OS=Arabidopsis thaliana GN=MXE10.5 PE=2 SV=1 - [Q9FKI4_ARATH]	0	5.73	1	1	1	1	192	21.7	7.37	0.73	0.703	0.77	1.548	0.984	1.532	1.35467	0.734333	1.84476	0.0291655
O04005	1-Cys peroxiredoxin PER1 OS=Arabidopsis thaliana GN=PER1 PE=2 SV=1 - [REHY_ARATH]	1368.78	91.2	2	21	21	251	216	24.1	6.61	0.71	0.735	0.731	1.323	1.423	1.258	1.33467	0.725333	1.84007	0.000233031
Q9MAM4	Protein IQ-domain 18 OS=Arabidopsis thaliana GN=IQD18 PE=4 SV=1 - [Q9MAM4_ARATH]	0	3.8	1	1	1	2	527	59.1	10.33	0.664	0.795	0.744	1.163	1.489	1.399	1.35033	0.734333	1.83886	0.00412964
Q9LXT3	Multiprotein-bridging factor 1b OS=Arabidopsis thaliana GN=MBF1B PE=2 SV=1 - [MBF1B_ARATH]	219.26	47.89	1	3	8	21	142	15.6	9.99	0.715	0.735	0.739	1.349	1.395	1.28	1.34133	0.729667	1.83828	5.77e-05
Q9LNV0	Calcium-dependent lipid-binding domain protein OS=Arabidopsis thaliana GN=At1g07310 PE=1 SV=1 - [Q9LNV0_ARATH]	61.2	7.67	1	2	2	4	352	39	7.66	0.811	0.666	0.769	1.425	1.383	1.314	1.374	0.748667	1.83526	0.000314806
Q9LF41	Probable ubiquitin conjugation factor E4 OS=Arabidopsis thaliana GN=PUB1 PE=2 SV=1 - [UBE4_ARATH]	0	0.96	1	1	1	2	1038	117.5	5.62	0.747	0.7	0.75	0.993	1.54	1.495	1.34267	0.732333	1.83341	0.025663
Q8GXU7	At4g13612 OS=Arabidopsis thaliana GN=At4g13615 PE=2 SV=1 - [Q8GXU7_ARATH]	181.82	23.94	1	2	2	3	71	7.2	10.71	0.758	0.763	0.693	1.3	1.431	1.323	1.35133	0.738	1.83107	0.000186872
O80837	Remorin OS=Arabidopsis thaliana GN=DBP PE=1 SV=1 - [REMO_ARATH]	116.01	44.74	1	8	10	18	190	21	8.54	0.691	0.779	0.727	1.307	1.452	1.261	1.34	0.732333	1.82977	0.000644856
O82514	Adenylate kinase 4 OS=Arabidopsis thaliana GN=ADK1 PE=1 SV=2 - [KAD4_ARATH]	382.13	58.54	3	11	15	42	246	26.9	7.36	0.709	0.735	0.744	1.279	1.476	1.232	1.329	0.729333	1.82221	0.00135892
Q84JF2	Class I peptide chain release factor OS=Arabidopsis thaliana GN=At1g62850 PE=2 SV=1 - [Q84JF2_ARATH]	0	9.75	1	1	1	1	236	26.1	10.02	0.695	0.792	0.735	1.332	1.434	1.28	1.34867	0.740667	1.82088	0.000336218
Q3E8H9	Late embryogenesis abundant protein family protein OS=Arabidopsis thaliana GN=At5g44310 PE=4 SV=1 - [Q3E8H9_ARATH]	325	66.1	4	29	29	99	295	33.3	5.54	0.717	0.747	0.749	1.293	1.529	1.204	1.342	0.737667	1.81925	0.00344741
O64644	Histone deacetylase complex subunit SAP18 OS=Arabidopsis thaliana GN=At2g45640 PE=1 SV=1 - [SAP18_ARATH]	41.81	25	2	4	4	5	152	17.2	9.17	0.693	0.831	0.687	1.388	1.382	1.245	1.33833	0.737	1.81592	0.000818069
Q9LPJ2	Putative cytochrome c oxidase subunit 6b-like OS=Arabidopsis thaliana GN=At1g32710 PE=3 SV=2 - [CX6BL_ARATH]	33.08	32.09	1	4	4	8	134	15.5	8.48	0.7	0.702	0.732	1.349	1.262	1.259	1.29	0.711333	1.8135	5.02e-05
Q67XK4	Ribosomal S29 subunit OS=Arabidopsis thaliana GN=At4g33865 PE=2 SV=1 - [Q67XK4_ARATH]	19.23	48.21	3	3	3	5	56	6.5	10.1	0.754	0.717	0.728	1.271	1.395	1.321	1.329	0.733	1.8131	9.31e-05
F4IN76	Bifunctional inhibitor/lipid-transfer protein/seed storage 2S albumin family protein OS=Arabidopsis thaliana GN=EDA4 PE=4 SV=1 - [F4IN76_ARATH]	0	6.11	2	1	1	1	131	13.2	7.43	0.699	0.793	0.735	1.287	1.474	1.276	1.34567	0.742333	1.81275	0.000987272
Q8L7B2	Serine carboxypeptidase-like 20 OS=Arabidopsis thaliana GN=SCPL20 PE=2 SV=2 - [SCP20_ARATH]	49.2	6.24	1	3	3	5	497	55.8	6.25	0.807	0.645	0.693	1.309	1.326	1.249	1.29467	0.715	1.81072	0.000409243
Q8LGG0	Peptidyl-prolyl cis-trans isomerase FKBP12 OS=Arabidopsis thaliana GN=FKBP12 PE=1 SV=2 - [FKB12_ARATH]	159.23	32.14	1	3	3	10	112	12	6.04	0.703	0.691	0.818	1.323	1.489	1.19	1.334	0.737333	1.80922	0.00334489
Q9LHI0	NADH dehydrogenase [ubiquinone] 1 alpha subcomplex subunit 6 OS=Arabidopsis thaliana GN=At3g12260 PE=2 SV=1 - [NDUA6_ARATH]	113.11	58.65	1	7	7	18	133	15.1	9.09	0.753	0.741	0.743	1.394	1.357	1.294	1.34833	0.745667	1.80823	3.36e-05
O82628	V-type proton ATPase subunit G1 OS=Arabidopsis thaliana GN=VHA-G1 PE=2 SV=1 - [VATG1_ARATH]	147.06	72.73	1	7	7	12	110	12.4	6	0.719	0.758	0.713	1.256	1.458	1.245	1.31967	0.73	1.80776	0.00112718
Q8W034	Heterogeneous nuclear ribonucleoprotein 1 OS=Arabidopsis thaliana GN=RNP1 PE=1 SV=1 - [RNP1_ARATH]	48.16	15.82	1	5	5	7	411	42.3	5.9	0.758	0.71	0.726	1.273	1.425	1.265	1.321	0.731333	1.80629	0.000397382
O22867	Defensin-like protein 194 OS=Arabidopsis thaliana GN=ATTI3 PE=3 SV=2 - [DF194_ARATH]	0	15.66	1	1	1	1	83	9.4	8.1	0.797	0.642	0.794	1.367	1.46	1.199	1.342	0.744333	1.80296	0.00288824
Q9SR67	AT3g10020/T22K18_16 OS=Arabidopsis thaliana GN=T22K18.16 PE=1 SV=1 - [Q9SR67_ARATH]	207.44	53.02	2	11	12	22	149	16.7	5.35	0.684	0.775	0.762	1.294	1.484	1.215	1.331	0.740333	1.79784	0.00222665
B9DGG8	Dormancy-associated protein 1 OS=Arabidopsis thaliana GN=DRM1 PE=1 SV=1 - [DRM1_ARATH]	34.26	25.76	2	3	3	8	132	14.4	9.29	0.733	0.713	0.741	1.219	1.358	1.35	1.309	0.729	1.79561	0.000224327
Q6NKU0	At4g36600 OS=Arabidopsis thaliana GN=At4g36600 PE=2 SV=1 - [Q6NKU0_ARATH]	411.77	56.57	3	19	21	69	350	37.6	5.5	0.725	0.757	0.742	1.29	1.46	1.242	1.33067	0.741333	1.79496	0.000909782
Q9S7I3	Non-specific lipid-transfer protein 2 OS=Arabidopsis thaliana GN=LTP2 PE=3 SV=1 - [NLTP2_ARATH]	298.14	44.07	1	5	6	64	118	11.9	8.97	0.747	0.714	0.745	1.328	1.287	1.335	1.31667	0.735333	1.79057	5.97e-06
Q9LE54	Protein SPIRAL1-like 2 OS=Arabidopsis thaliana GN=SP1L2 PE=2 SV=1 - [SP1L2_ARATH]	0	15.45	2	1	1	2	110	10.9	7.42	0.749	0.713	0.779	1.291	1.445	1.274	1.33667	0.747	1.78938	0.000514499
Q94KD0	Transcription initiation factor TFIID subunit 15b OS=Arabidopsis thaliana GN=TAF15B PE=1 SV=1 - [TA15B_ARATH]	55.98	10.43	2	5	5	7	422	42.3	8.5	0.741	0.745	0.728	1.252	1.412	1.296	1.32	0.738	1.78862	0.000265375
Q8L9P8	Protein RALF-like 33 OS=Arabidopsis thaliana GN=RALFL33 PE=2 SV=1 - [RLF33_ARATH]	0	7.76	3	1	1	1	116	12.8	9.19	0.782	0.687	0.774	1.261	1.452	1.289	1.334	0.747667	1.78422	0.000932784
F4JUT9	Plasma-membrane associated cation-binding protein 1 OS=Arabidopsis thaliana GN=PCAP1 PE=1 SV=1 - [F4JUT9_ARATH]	36.44	22.75	3	4	4	7	167	19	9.88	0.738	0.766	0.726	1.292	1.35	1.323	1.32167	0.743333	1.77803	9.44e-06
Q9C865	SH3 domain-containing protein 1 OS=Arabidopsis thaliana GN=SH3P1 PE=1 SV=1 - [SH3P1_ARATH]	0	5.47	1	1	1	1	439	49.2	6.64	0.756	0.687	0.806	1.288	1.369	1.338	1.33167	0.749667	1.77635	0.000154242
Q8LGE7	NADH dehydrogenase [ubiquinone] 1 alpha subcomplex subunit 8-B OS=Arabidopsis thaliana GN=At5g18800 PE=1 SV=1 - [NDA8B_ARATH]	0	35.85	3	4	4	6	106	12	7.56	0.765	0.736	0.73	1.275	1.507	1.18	1.32067	0.743667	1.77589	0.00411682
Q9FMP2	Rab geranylgeranyltransferase, beta subunit OS=Arabidopsis thaliana PE=2 SV=1 - [Q9FMP2_ARATH]	0	4.79	3	1	1	1	313	34.7	5.63	0.76	0.693	0.8	1.331	1.405	1.264	1.33333	0.751	1.77541	0.000343586
Q9LE44	At3g12960 OS=Arabidopsis thaliana GN=At3g12960 PE=2 SV=1 - [Q9LE44_ARATH]	236.04	63.95	1	6	6	27	86	9.5	6.11	0.725	0.688	0.759	1.252	1.292	1.294	1.27933	0.724	1.76703	2.3e-05
O82762	F17H15.1/F17H15.1 OS=Arabidopsis thaliana GN=At2g25970 PE=1 SV=1 - [O82762_ARATH]	217.18	20.25	3	10	10	19	632	64.6	5.49	0.76	0.715	0.778	1.307	1.42	1.236	1.321	0.751	1.75899	0.000552775
Q8W455	Expressed protein OS=Arabidopsis thaliana GN=At2g36835 PE=2 SV=1 - [Q8W455_ARATH]	49.58	21.77	1	3	3	4	124	13.4	8.13	0.769	0.691	0.796	1.259	1.432	1.275	1.322	0.752	1.75798	0.000854462
Q9CAT7	Nascent polypeptide-associated complex subunit beta OS=Arabidopsis thaliana GN=At1g73230 PE=2 SV=1 - [BTF3L_ARATH]	66.1	38.18	1	3	7	13	165	18	6.21	0.731	0.704	0.757	1.273	1.323	1.257	1.28433	0.730667	1.75776	2.49e-05
F4HPB7	Uncharacterized protein OS=Arabidopsis thaliana GN=At1g26750 PE=4 SV=1 - [F4HPB7_ARATH]	0	6.15	2	1	1	1	195	22	9.67	0.712	0.702	0.848	1.288	1.168	1.516	1.324	0.754	1.75597	0.00712414
Q8LDC9	GroES-like protein OS=Arabidopsis thaliana GN=At1g23100 PE=2 SV=1 - [Q8LDC9_ARATH]	31.88	52.58	3	4	4	7	97	10.5	8.5	0.785	0.705	0.737	1.246	1.338	1.322	1.302	0.742333	1.75393	0.000107657
O22870	Peptidyl-prolyl cis-trans isomerase FKBP16-3, chloroplastic OS=Arabidopsis thaliana GN=FKBP16-3 PE=1 SV=2 - [FK163_ARATH]	34.4	16.14	1	4	4	6	223	23.5	8.25	0.735	0.742	0.773	1.275	1.445	1.225	1.315	0.75	1.75333	0.00112041
F4J3P1	60S ribosomal protein L23 OS=Arabidopsis thaliana GN=emb2171 PE=3 SV=1 - [F4J3P1_ARATH]	544.21	77.6	4	9	9	51	125	13.4	10.05	0.754	0.756	0.761	1.312	1.383	1.279	1.32467	0.757	1.74989	5.07e-05
Q9ZV18	PR-6 proteinase inhibitor family protein OS=Arabidopsis thaliana GN=At2g38870 PE=2 SV=2 - [Q9ZV18_ARATH]	239.57	40	3	2	2	8	70	7.6	6.58	0.757	0.718	0.779	1.238	1.386	1.309	1.311	0.751333	1.7449	0.000268842
Q9SKP0	Late embryogenesis abundant protein (AtECP63) OS=Arabidopsis thaliana GN=ECP63 PE=4 SV=1 - [Q9SKP0_ARATH]	929.65	56.47	10	24	27	129	448	48.5	5.54	0.75	0.746	0.773	1.289	1.454	1.21	1.31767	0.756333	1.74218	0.00148891
Q0WLA2	Putative uncharacterized protein At4g01290 OS=Arabidopsis thaliana GN=At4g01290 PE=2 SV=1 - [Q0WLA2_ARATH]	29.54	1.75	10	1	1	1	629	68.3	6.77	0.816	0.825	0.642	1.421	1.403	1.152	1.32533	0.761	1.74157	0.00584628
P0DKC3	Phosphoglycolate phosphatase 1A, chloroplastic OS=Arabidopsis thaliana GN=PGLP1A PE=1 SV=1 - [PGP1A_ARATH]	0	7.73	1	1	1	1	362	39.7	7.25	0.763	0.719	0.799	1.333	1.287	1.341	1.32033	0.760333	1.73652	4.01e-05
Q93ZB6	Uroporphyrinogen decarboxylase 1, chloroplastic OS=Arabidopsis thaliana GN=HEME1 PE=2 SV=2 - [DCUP1_ARATH]	0	3.83	1	1	1	1	418	46.2	7.11	0.632	0.864	0.793	1.27	1.407	1.29	1.32233	0.763	1.73307	0.00229021
Q8LEJ7	At1g55265 OS=Arabidopsis thaliana GN=At1g55265 PE=2 SV=1 - [Q8LEJ7_ARATH]	0	5.71	1	1	1	1	175	19.1	5.26	0.709	0.798	0.781	1.272	1.466	1.225	1.321	0.762667	1.73208	0.00207882
Q9LZW6	AT5g01800/T20L15_70 OS=Arabidopsis thaliana GN=T20L15_70 PE=2 SV=1 - [Q9LZW6_ARATH]	0	4.15	1	1	1	1	217	24.6	6.2	0.763	0.742	0.783	1.383	1.325	1.254	1.32067	0.762667	1.73164	0.000140531
Q9FNE2	Glutaredoxin-C2 OS=Arabidopsis thaliana GN=GRXC2 PE=2 SV=1 - [GRXC2_ARATH]	456.5	85.59	2	8	8	21	111	11.7	7.24	0.744	0.762	0.755	1.281	1.442	1.191	1.30467	0.753667	1.73109	0.00170285
A8MSB9	Glycine-rich RNA-binding protein 2 OS=Arabidopsis thaliana GN=GR-RBP2 PE=4 SV=1 - [A8MSB9_ARATH]	264.06	44.44	4	4	4	14	144	14.7	7.34	0.767	0.727	0.754	1.28	1.361	1.248	1.29633	0.749333	1.72998	0.000105031
P24102	Peroxidase 22 OS=Arabidopsis thaliana GN=PER22 PE=1 SV=2 - [PER22_ARATH]	140.05	33.24	9	10	10	26	349	38.1	6	0.738	0.763	0.77	1.323	1.206	1.398	1.309	0.757	1.72919	0.000623586
O80910	At2g38410 OS=Arabidopsis thaliana GN=At2g38410 PE=1 SV=1 - [O80910_ARATH]	41.23	1.94	1	1	1	1	671	72.3	5.82	0.805	0.663	0.825	1.406	1.435	1.118	1.31967	0.764333	1.72656	0.00803677
F4KG52	Low-temperature-induced 65 OS=Arabidopsis thaliana GN=LTI65 PE=4 SV=1 - [F4KG52_ARATH]	644.78	63.92	3	37	38	121	618	65.8	5.19	0.752	0.762	0.775	1.306	1.41	1.222	1.31267	0.763	1.7204	0.000554624
Q8LDQ7	Nuclear RNA binding protein A-like protein OS=Arabidopsis thaliana PE=2 SV=1 - [Q8LDQ7_ARATH]	264.63	23.53	5	6	10	40	357	37.9	8.53	0.737	0.753	0.771	1.213	1.433	1.242	1.296	0.753667	1.71959	0.00147151
Q9LY15	Peptide methionine sulfoxide reductase A2 OS=Arabidopsis thaliana GN=MRSA2 PE=1 SV=1 - [MSRA2_ARATH]	30.56	9.63	1	1	2	3	218	24.4	5.2	0.763	0.727	0.802	1.146	1.571	1.224	1.31367	0.764	1.71946	0.0142441
Q9SV68	Putative quinone-oxidoreductase homolog, chloroplastic OS=Arabidopsis thaliana GN=At4g13010 PE=2 SV=1 - [QORH_ARATH]	516.82	65.05	2	16	16	54	329	34.4	8.95	0.755	0.766	0.741	1.308	1.399	1.176	1.29433	0.754	1.71662	0.00115325
E0Y422	Cytochrome b6-f complex iron-sulfur subunit OS=Arabidopsis thaliana GN=At4g03280 PE=3 SV=1 - [E0Y422_ARATH]	183.37	27.95	2	5	5	16	229	24.3	8.54	0.784	0.761	0.799	1.26	1.51	1.252	1.34067	0.781333	1.71587	0.00281158
Q9SA21	F3O9.2 protein OS=Arabidopsis thaliana GN=F3O9.2 PE=4 SV=1 - [Q9SA21_ARATH]	39.59	21.74	2	5	5	7	230	26.3	9.06	0.743	0.723	0.812	1.227	1.346	1.334	1.30233	0.759333	1.7151	0.000306183
Q9C8R4	Putative uncharacterized protein At1g30070 OS=Arabidopsis thaliana GN=T1P2.12 PE=1 SV=1 - [Q9C8R4_ARATH]	84.36	28.83	2	6	6	8	222	24.8	8.66	0.697	0.761	0.819	1.266	1.415	1.223	1.30133	0.759	1.71454	0.00134023
Q9LJQ9	Cytochrome c oxidase copper chaperone 1 OS=Arabidopsis thaliana GN=COX17-1 PE=2 SV=1 - [CX171_ARATH]	23.31	21.62	1	2	2	4	74	8	7.66	0.746	0.801	0.754	1.26	1.443	1.24	1.31433	0.767	1.7136	0.00121084
P83291	NADH-cytochrome b5 reductase-like protein OS=Arabidopsis thaliana GN=CBR2 PE=1 SV=2 - [NB5R2_ARATH]	104.31	41.16	1	12	12	27	328	36	8.69	0.755	0.767	0.756	1.28	1.363	1.259	1.30067	0.759333	1.71291	7.14e-05
Q8LG89	Basic blue protein OS=Arabidopsis thaliana GN=ARPN PE=2 SV=2 - [BABL_ARATH]	185.21	49.61	1	6	6	19	129	14	9.5	0.764	0.744	0.784	1.231	1.353	1.328	1.304	0.764	1.70681	0.000157039
Q9T0A4	NAD(P)H-quinone oxidoreductase subunit S, chloroplastic OS=Arabidopsis thaliana GN=ndhS PE=1 SV=1 - [NDHS_ARATH]	0	4	1	1	1	1	250	27.7	8.21	0.747	0.801	0.756	1.236	1.404	1.292	1.31067	0.768	1.7066	0.000481162
Q9FMN0	Putative uncharacterized protein At5g42890 OS=Arabidopsis thaliana GN=SCP2 PE=2 SV=1 - [Q9FMN0_ARATH]	136.02	64.23	1	11	11	22	123	13.6	9.2	0.787	0.745	0.761	1.206	1.459	1.245	1.30333	0.764333	1.70519	0.00248082
Q9FXT6	Peroxisomal membrane protein PEX14 OS=Arabidopsis thaliana GN=PEX14 PE=1 SV=2 - [PEX14_ARATH]	0	7.5	1	2	2	2	507	55.6	5.97	0.778	0.73	0.778	1.384	1.297	1.212	1.29767	0.762	1.70297	0.000507223
Q9SID3	Hydroxyacylglutathione hydrolase 2, mitochondrial OS=Arabidopsis thaliana GN=At2g31350 PE=1 SV=1 - [GLO2N_ARATH]	40.38	7.1	1	1	1	1	324	35.8	8.79	0.806	0.778	0.72	1.222	1.303	1.393	1.306	0.768	1.70052	0.000633894
Q8W4H8	Inactive GDSL esterase/lipase-like protein 23 OS=Arabidopsis thaliana GN=GLL23 PE=1 SV=1 - [GDL19_ARATH]	169.31	37.05	2	9	11	21	386	43.1	8.07	0.768	0.744	0.777	1.289	1.314	1.287	1.29667	0.763	1.69943	2.19e-06
Q8LBE4	Ribosomal protein L7Ae-like OS=Arabidopsis thaliana PE=2 SV=1 - [Q8LBE4_ARATH]	0	11.72	7	3	3	4	128	13.9	7.28	0.712	0.722	0.839	1.235	1.447	1.172	1.28467	0.757667	1.69556	0.00471437
Q9XI93	At1g13930/F16A14.27 OS=Arabidopsis thaliana GN=F7A19.2 PE=1 SV=1 - [Q9XI93_ARATH]	78.39	42.58	2	6	6	13	155	16.2	4.92	0.773	0.78	0.736	1.215	1.388	1.272	1.29167	0.763	1.69288	0.000555105
Q8RWN5	Glycine-rich RNA-binding protein RZ1C OS=Arabidopsis thaliana GN=RZ1C PE=1 SV=1 - [RZ1C_ARATH]	48.76	22.26	2	8	8	14	310	33.5	9	0.781	0.751	0.789	1.249	1.374	1.306	1.30967	0.773667	1.6928	0.000145674
Q9T022	Dehydrin family protein OS=Arabidopsis thaliana GN=T22F8.30 PE=2 SV=1 - [Q9T022_ARATH]	0	5.3	1	1	1	1	151	16.3	6.6	0.806	0.621	0.889	1.343	1.323	1.251	1.30567	0.772	1.69128	0.00314425
Q9C7N4	GDSL esterase/lipase At1g29670 OS=Arabidopsis thaliana GN=At1g29670 PE=2 SV=1 - [GDL15_ARATH]	0	6.06	1	1	1	1	363	39.8	8.54	0.78	0.656	0.908	2.132	0.788	1.042	1.32067	0.781333	1.69027	0.267083
Q940P0	AT5g03660/F17C15_80 OS=Arabidopsis thaliana GN=At5g03660 PE=1 SV=1 - [Q940P0_ARATH]	26.11	54.34	6	8	10	13	173	20.2	5.67	0.74	0.734	0.833	1.251	1.391	1.252	1.298	0.769	1.68791	0.000723487
Q9FK35	Adenylate kinase 3 OS=Arabidopsis thaliana GN=ADK2 PE=1 SV=1 - [KAD3_ARATH]	299.93	53.63	1	10	13	31	248	27.3	7.37	0.749	0.753	0.79	1.252	1.396	1.21	1.286	0.764	1.68325	0.00083342
P25819	Catalase-2 OS=Arabidopsis thaliana GN=CAT2 PE=2 SV=3 - [CATA2_ARATH]	739.07	43.29	5	9	19	100	492	56.9	7.12	0.767	0.746	0.768	1.223	1.371	1.244	1.27933	0.760333	1.6826	0.00037563
Q93W30	Expressed protein OS=Arabidopsis thaliana GN=At2g35605 PE=2 SV=1 - [Q93W30_ARATH]	81.11	63.3	1	7	7	15	109	11.9	9.94	0.857	0.718	0.719	1.302	1.331	1.223	1.28533	0.764667	1.68091	0.000761505
Q8GWP4	At2g21530 OS=Arabidopsis thaliana GN=At2g21530 PE=1 SV=1 - [Q8GWP4_ARATH]	83.31	20.1	2	3	3	5	209	22.7	7.88	0.783	0.718	0.832	1.278	1.392	1.245	1.305	0.777667	1.6781	0.000681756
Q9FMN4	Thioredoxin-like protein Clot OS=Arabidopsis thaliana GN=At5g42850 PE=2 SV=1 - [TCLOT_ARATH]	73.43	44.78	1	5	5	9	134	15.2	6.54	0.709	0.785	0.823	1.298	1.386	1.199	1.29433	0.772333	1.67587	0.00119838
O48845	Cytochrome b5 isoform B OS=Arabidopsis thaliana GN=CYTB5-B PE=1 SV=1 - [CYB5B_ARATH]	0	13.43	1	1	1	1	134	15	5.15	0.719	0.789	0.825	1.313	1.303	1.289	1.30167	0.777667	1.67381	8.03e-05
Q9S825	Probable eukaryotic translation initiation factor 5-2 OS=Arabidopsis thaliana GN=At1g77840 PE=2 SV=1 - [IF5Z_ARATH]	38.79	2.29	2	1	1	1	437	48.6	5.59	0.71	0.876	0.782	2.123	0.894	0.935	1.31733	0.789333	1.66892	0.263162
Q8LEF5	50S ribosomal protein L27 OS=Arabidopsis thaliana PE=2 SV=1 - [Q8LEF5_ARATH]	29.86	6.63	2	1	1	2	196	21.6	9.95	0.789	0.741	0.801	1.207	1.443	1.24	1.29667	0.777	1.66881	0.00239642
Q9C6E4	Protein EXORDIUM-like 1 OS=Arabidopsis thaliana GN=EXL1 PE=2 SV=1 - [EXOL1_ARATH]	0	3.24	1	1	1	2	309	33.2	8.73	0.82	0.636	0.874	1.218	1.366	1.302	1.29533	0.776667	1.66781	0.0034671
Q2HIK4	At1g29990 OS=Arabidopsis thaliana GN=PFD6 PE=2 SV=1 - [Q2HIK4_ARATH]	85.16	25.58	3	4	4	11	129	14.8	9.09	0.762	0.753	0.799	1.301	1.492	1.065	1.286	0.771333	1.66724	0.0143672
Q96273	LEA D113 homologue type2 OS=Arabidopsis thaliana GN=LEA18 PE=2 SV=1 - [Q96273_ARATH]	180.51	62.89	1	6	7	38	97	10.5	9.66	0.758	0.774	0.819	1.374	1.309	1.23	1.30433	0.783667	1.6644	0.000331733
Q9C9B0	UDP-glycosyltransferase 89B1 OS=Arabidopsis thaliana GN=UGT89B1 PE=2 SV=2 - [U89B1_ARATH]	0	3.17	2	1	1	1	473	52.1	6.21	0.764	0.87	0.711	1.25	1.635	1.017	1.30067	0.781667	1.66397	0.0494126
Q9M034	Heat shock protein 40-like OS=Arabidopsis thaliana GN=T10O8_100 PE=2 SV=1 - [Q9M034_ARATH]	0	29.25	6	5	6	6	335	36.9	9.07	0.836	0.746	0.791	1.295	1.32	1.33	1.315	0.791	1.66245	4.79e-05
Q9SIH1	Peptidyl-prolyl cis-trans isomerase CYP18-2 OS=Arabidopsis thaliana GN=CYP18-2 PE=2 SV=1 - [CP18B_ARATH]	21.4	32.32	1	5	5	5	164	18.2	8.44	0.735	0.779	0.728	1.275	1.213	1.232	1.24	0.747333	1.65923	3.5e-05
C0Z2H5	AT1G48450 protein OS=Arabidopsis thaliana GN=At1g48450 PE=2 SV=1 - [C0Z2H5_ARATH]	0	4.67	4	1	1	5	321	36	6.28	0.737	0.643	0.897	1.539	1.003	1.236	1.25933	0.759	1.6592	0.0437058
O82245	Translocator protein homolog OS=Arabidopsis thaliana GN=TSPO PE=1 SV=1 - [TSPO_ARATH]	0	6.12	1	1	1	2	196	21	9.23	0.741	0.814	0.774	1.056	1.394	1.408	1.286	0.776333	1.6565	0.0120955
Q8L7T1	At2g41260/F13H10.19 OS=Arabidopsis thaliana GN=M17 PE=2 SV=1 - [Q8L7T1_ARATH]	46.59	12.44	2	1	1	1	225	23.9	6.32	0.888	0.725	0.726	1.308	1.161	1.402	1.29033	0.779667	1.65498	0.00449857
O22866	Defensin-like protein 193 OS=Arabidopsis thaliana GN=ATTI2 PE=3 SV=1 - [DF193_ARATH]	174.22	46.67	1	3	3	18	90	9.7	8.98	0.811	0.734	0.809	1.274	1.316	1.303	1.29767	0.784667	1.65378	5.38e-05
Q9ZP06	Malate dehydrogenase 1, mitochondrial OS=Arabidopsis thaliana GN=At1g53240 PE=1 SV=1 - [MDHM1_ARATH]	1124.4	55.72	1	6	16	75	341	35.8	8.35	0.767	0.762	0.729	1.323	1.274	1.136	1.24433	0.752667	1.65323	0.00100916
Q9CAF4	Nuclear pore complex protein NUP1 OS=Arabidopsis thaliana GN=NUP1 PE=1 SV=1 - [NUP1_ARATH]	34.98	3.44	1	4	4	4	1309	135.8	9.45	0.764	0.741	0.77	1.311	1.248	1.199	1.25267	0.758333	1.65187	0.000124198
Q96528	Catalase-1 OS=Arabidopsis thaliana GN=CAT1 PE=2 SV=3 - [CATA1_ARATH]	632.73	35.77	1	7	15	80	492	56.7	7.42	0.753	0.79	0.768	1.232	1.351	1.228	1.27033	0.770333	1.64907	0.00027875
Q6NQD2	At5g12240 OS=Arabidopsis thaliana GN=At5g12240 PE=2 SV=1 - [Q6NQD2_ARATH]	0	8.77	3	1	1	1	114	13.2	5.39	0.727	0.924	0.702	1.184	1.478	1.217	1.293	0.784333	1.64853	0.0120087
Q9FKZ4	Putative uncharacterized protein At5g66860; MUD21.12 OS=Arabidopsis thaliana GN=At5g66860 PE=2 SV=1 - [Q9FKZ4_ARATH]	44.71	6.83	1	1	1	1	249	27.3	9.33	0.758	0.693	0.902	1.258	1.268	1.339	1.28833	0.784333	1.64258	0.00165407
Q9SJI5	Putative uncharacterized protein At2g42710 OS=Arabidopsis thaliana GN=At2g42710 PE=4 SV=1 - [Q9SJI5_ARATH]	0	3.85	2	1	1	1	286	31.6	6.46	0.715	0.864	0.777	1.079	1.615	1.175	1.28967	0.785333	1.64219	0.0416924
Q8GYJ4	Cox19-like CHCH family protein OS=Arabidopsis thaliana GN=At5g23395 PE=2 SV=1 - [Q8GYJ4_ARATH]	32.97	4.94	1	1	1	2	162	17.4	4.48	0.811	0.854	0.688	1.251	1.348	1.264	1.28767	0.784333	1.64173	0.000989375
Q9SKM8	Expressed protein OS=Arabidopsis thaliana GN=At2g28420 PE=4 SV=1 - [Q9SKM8_ARATH]	26.76	10.87	2	2	2	3	184	21	5.25	0.748	0.63	0.978	1.511	0.9	1.454	1.28833	0.785333	1.64049	0.0842198
Q94IU8	Putative uncharacterized protein At5g19050 OS=Arabidopsis thaliana GN=At5g19050 PE=1 SV=1 - [Q94IU8_ARATH]	0	4.99	1	1	1	1	361	38.4	6.05	0.867	0.662	0.809	1.057	1.089	1.689	1.27833	0.779333	1.64029	0.080483
Q8VYF7	Single-stranded DNA-binding protein WHY2, mitochondrial OS=Arabidopsis thaliana GN=WHY2 PE=1 SV=1 - [WHY2_ARATH]	45.47	17.23	2	3	3	3	238	26.3	9.64	0.791	0.765	0.789	1.165	1.484	1.196	1.28167	0.781667	1.63966	0.00800625
Q38942	Protein RAE1 OS=Arabidopsis thaliana GN=RAE1 PE=1 SV=2 - [RAE1_ARATH]	102.5	24.36	1	6	6	11	349	38.2	8.37	0.794	0.758	0.821	1.217	1.253	1.402	1.29067	0.791	1.63169	0.00110004
Q9LHF0	Zinc-finger homeodomain protein 9 OS=Arabidopsis thaliana GN=ZHD9 PE=1 SV=1 - [ZHD9_ARATH]	0	7.05	8	1	2	2	312	33.5	8.28	0.806	0.798	0.766	1.375	1.356	1.135	1.28867	0.79	1.63122	0.00307194
O49570	At4g31200 OS=Arabidopsis thaliana GN=At4g31200 PE=2 SV=1 - [O49570_ARATH]	46.33	5.54	1	2	2	2	650	72.5	6.73	0.744	0.822	0.792	1.388	1.219	1.236	1.281	0.786	1.62977	0.00105709
Q38867	Peptidyl-prolyl cis-trans isomerase CYP19-3 OS=Arabidopsis thaliana GN=CYP19-3 PE=2 SV=2 - [CP19C_ARATH]	223.22	50.57	1	7	9	31	176	18.9	7.81	0.804	0.782	0.776	1.202	1.432	1.213	1.28233	0.787333	1.6287	0.00278283
Q9C5G6	Peptidase C15, pyroglutamyl peptidase I-like protein OS=Arabidopsis thaliana GN=At1g23430 PE=2 SV=1 - [Q9C5G6_ARATH]	0	4.15	2	1	1	1	217	23.6	7.06	0.79	0.885	0.698	1.366	1.245	1.249	1.28667	0.791	1.62663	0.00178065
Q9M9M6	NADH dehydrogenase [ubiquinone] iron-sulfur protein 6, mitochondrial OS=Arabidopsis thaliana GN=At3g03070 PE=3 SV=1 - [NDUS6_ARATH]	0	12.73	1	1	1	2	110	12.2	7.43	0.858	0.708	0.801	1.311	1.348	1.19	1.283	0.789	1.62611	0.00158126
Q9C9Z5	NADH dehydrogenase [ubiquinone] 1 alpha subcomplex subunit 1 OS=Arabidopsis thaliana GN=At3g08610 PE=3 SV=1 - [NDUA1_ARATH]	0	20	1	1	1	1	65	7.3	8.21	0.749	0.762	0.835	0.901	0.831	2.072	1.268	0.782	1.62148	0.294697
P55852	Small ubiquitin-related modifier 1 OS=Arabidopsis thaliana GN=SUMO1 PE=1 SV=2 - [SUMO1_ARATH]	0	40	1	1	4	5	100	11	5.1	0.741	0.77	0.866	1.267	1.389	1.195	1.28367	0.792333	1.62011	0.00195287
P54150	Peptide methionine sulfoxide reductase A4, chloroplastic OS=Arabidopsis thaliana GN=MSR4 PE=1 SV=2 - [MSRA4_ARATH]	172.71	19.77	1	4	5	18	258	28.6	8.75	0.759	0.824	0.769	1.239	1.395	1.175	1.26967	0.784	1.61947	0.00207663
F4JFY5	L-ascorbate peroxidase S OS=Arabidopsis thaliana GN=SAPX PE=3 SV=1 - [F4JFY5_ARATH]	184.35	45.82	5	10	13	35	371	40.3	7.94	0.76	0.789	0.807	1.254	1.361	1.196	1.27033	0.785333	1.61757	0.0006435
Q9SUU5	Cytochrome b-c1 complex subunit 7-1 OS=Arabidopsis thaliana GN=QCR7-1 PE=1 SV=1 - [QCR71_ARATH]	193.99	49.18	4	6	6	18	122	14.5	9.73	0.796	0.781	0.775	1.204	1.419	1.18	1.26767	0.784	1.61692	0.00316202
Q9SJI8	Multiprotein-bridging factor 1a OS=Arabidopsis thaliana GN=MBF1A PE=2 SV=1 - [MBF1A_ARATH]	222.67	50	1	1	6	14	142	15.6	9.89	0.832	0.774	0.769	1.206	1.401	1.23	1.279	0.791667	1.61558	0.00165748
Q38935	Peptidyl-prolyl cis-trans isomerase FKBP15-1 OS=Arabidopsis thaliana GN=FKBP15-1 PE=2 SV=2 - [FK151_ARATH]	36.7	20.92	1	2	3	6	153	16.3	8.37	0.758	0.833	0.759	1.459	1.196	1.14	1.265	0.783333	1.61489	0.00897767
P23586	Sugar transport protein 1 OS=Arabidopsis thaliana GN=STP1 PE=1 SV=2 - [STP1_ARATH]	0	3.64	1	1	1	1	522	57.6	8.94	0.785	0.715	0.883	1.384	1.218	1.242	1.28133	0.794333	1.61309	0.00237936
P31582	Ras-related protein RABF2a OS=Arabidopsis thaliana GN=RABF2A PE=1 SV=1 - [RAF2A_ARATH]	0	4	1	1	1	1	200	21.6	5.64	0.789	0.855	0.735	1.306	1.089	1.439	1.278	0.793	1.6116	0.0108102
P57742	Probable prefoldin subunit 5 OS=Arabidopsis thaliana GN=At5g23290 PE=2 SV=1 - [PFD5_ARATH]	61.71	34.44	2	4	4	5	151	16.4	5.71	0.845	0.803	0.803	1.32	1.46	1.16	1.31333	0.817	1.60751	0.00482263
Q9XFK7	Protein MOTHER of FT and TFL1 OS=Arabidopsis thaliana GN=MFT PE=1 SV=1 - [MFT_ARATH]	209.79	43.35	1	7	7	20	173	19.1	8.19	0.768	0.788	0.802	1.274	1.298	1.218	1.26333	0.786	1.60729	4.93e-05
Q39131	Lamin-like protein OS=Arabidopsis thaliana GN=At5g15350 PE=1 SV=1 - [LAML_ARATH]	0	8.72	1	2	2	5	172	19.4	9.42	0.79	0.785	0.774	1.511	1.201	1.063	1.25833	0.783	1.60707	0.0230424
Q39133	Major latex protein type3 OS=Arabidopsis thaliana GN=MLP3 PE=2 SV=1 - [Q39133_ARATH]	460.43	66.45	5	10	13	116	155	17.9	7.15	0.771	0.77	0.818	1.259	1.305	1.227	1.26367	0.786333	1.60704	6.58e-05
F4IZI7	Transducin/WD40 domain-containing protein OS=Arabidopsis thaliana GN=AtATG18a PE=4 SV=1 - [F4IZI7_ARATH]	0	3.03	2	1	1	1	396	43.5	7.99	0.75	0.975	0.663	1.145	1.529	1.162	1.27867	0.796	1.60637	0.0364225
A5YXU7	Auxin-resistance protein 6 (Fragment) OS=Arabidopsis thaliana GN=AXR6 PE=3 SV=1 - [A5YXU7_ARATH]	0	9.3	3	1	1	1	129	14.6	5.15	0.729	0.881	0.784	1.256	1.421	1.16	1.279	0.798	1.60276	0.00549892
P25865	Ubiquitin-conjugating enzyme E2 1 OS=Arabidopsis thaliana GN=UBC1 PE=1 SV=1 - [UBC1_ARATH]	0	6.58	1	1	1	1	152	17.3	5.58	0.858	0.751	0.774	1.24	1.246	1.333	1.273	0.794333	1.6026	0.00041529
Q9FT52	ATP synthase subunit d, mitochondrial OS=Arabidopsis thaliana GN=At3g52300 PE=1 SV=3 - [ATP5H_ARATH]	266.29	69.05	2	15	15	40	168	19.6	5.19	0.754	0.798	0.81	1.214	1.358	1.212	1.26133	0.787333	1.60203	0.000759615
F4K4E3	Sm-like protein LSM4 OS=Arabidopsis thaliana GN=LSM4 PE=1 SV=1 - [LSM4_ARATH]	44.12	14.73	1	2	2	3	129	14.3	9.92	0.789	0.797	0.827	1.34	1.282	1.239	1.287	0.804333	1.60008	0.000105372
Q9FRL2	Cytosolic IMP-GMP specific 5'-nucleotidase, putative; 41097-37373 OS=Arabidopsis thaliana GN=F22H5.7 PE=4 SV=1 - [Q9FRL2_ARATH]	39.68	2.55	2	1	1	2	510	59.3	6.65	0.814	0.763	0.82	1.367	1.344	1.121	1.27733	0.799	1.59866	0.00402405
Q8GWS7	AT5G58210 protein OS=Arabidopsis thaliana GN=At5g58210 PE=2 SV=1 - [Q8GWS7_ARATH]	0	2.89	1	1	1	1	380	40.8	5.1	0.776	0.797	0.822	1.358	1.202	1.268	1.276	0.798333	1.59833	0.000533327
Q8VZ93	Allyl alcohol dehydrogenase-like protein OS=Arabidopsis thaliana GN=F24G16.11 PE=2 SV=1 - [Q8VZ93_ARATH]	0	26.8	2	2	2	3	97	10.5	4.77	0.834	0.66	0.8	1.23	1.221	1.214	1.22167	0.764667	1.59765	0.00102701
F4HWQ8	Cell wall / vacuolar inhibitor of fructosidase 1 OS=Arabidopsis thaliana GN=C/VIF1 PE=1 SV=1 - [CVIF1_ARATH]	153.27	15.61	1	2	2	4	205	22.3	8.15	0.788	0.754	0.824	1.233	1.341	1.204	1.25933	0.788667	1.59679	0.000528413
Q9C5C8	Peptide methionine sulfoxide reductase B2, chloroplastic OS=Arabidopsis thaliana GN=MSRB2 PE=1 SV=1 - [MSRB2_ARATH]	181.26	35.15	2	5	6	26	202	22	8.56	0.817	0.728	0.823	1.267	1.187	1.322	1.25867	0.789333	1.59459	0.000706423
Q9SMW7	Basic transcription factor 3 OS=Arabidopsis thaliana GN=BTF3 PE=1 SV=1 - [BTF3_ARATH]	109.17	54.55	1	5	9	20	165	17.9	7.25	0.807	0.818	0.775	1.24	1.314	1.264	1.27267	0.8	1.59083	4.85e-05
Q94AZ4	Probable calcium-binding protein CML13 OS=Arabidopsis thaliana GN=CML13 PE=2 SV=1 - [CML13_ARATH]	136.46	79.73	1	4	10	20	148	16.5	4.94	0.809	0.749	0.846	1.285	1.293	1.245	1.27433	0.801333	1.59027	0.000120828
Q940M5	AT3G10250 protein OS=Arabidopsis thaliana GN=At3g10250 PE=2 SV=1 - [Q940M5_ARATH]	19.5	4.63	2	1	1	1	324	36.4	5.27	0.83	0.734	0.83	1.095	1.46	1.25	1.26833	0.798	1.58939	0.0130907
Q9FFD8	At5g16470 OS=Arabidopsis thaliana GN=At5g16470 PE=1 SV=1 - [Q9FFD8_ARATH]	21.54	7.69	1	1	1	1	104	11.2	9.83	0.78	0.832	0.791	1.266	1.356	1.196	1.27267	0.801	1.58885	0.000648037
P49200	40S ribosomal protein S20-1 OS=Arabidopsis thaliana GN=RPS20A PE=2 SV=2 - [RS201_ARATH]	274.15	49.19	7	2	6	25	124	13.9	9.72	0.833	0.79	0.738	1.181	1.397	1.17	1.24933	0.787	1.58746	0.00422174
Q8LBK6	Monothiol glutaredoxin-S15, mitochondrial OS=Arabidopsis thaliana GN=GRXS15 PE=1 SV=2 - [GRS15_ARATH]	115.27	30.77	1	4	4	9	169	18.7	6.33	0.861	0.771	0.771	1.202	1.285	1.321	1.26933	0.801	1.58469	0.000536528
Q9LVM4	Bis(5'-adenosyl)-triphosphatase-like protein OS=Arabidopsis thaliana GN=FHIT PE=4 SV=1 - [Q9LVM4_ARATH]	35.31	19.38	3	2	2	2	160	18.1	5.58	0.802	0.792	0.808	1.27	1.31	1.224	1.268	0.800667	1.58368	5.04e-05
Q8RUC6	Ubiquitin-NEDD8-like protein RUB2 OS=Arabidopsis thaliana GN=RUB2 PE=1 SV=3 - [RUB2_ARATH]	382.25	61.04	43	3	11	104	154	17.1	6.06	0.72	0.825	0.845	1.223	1.284	1.277	1.26133	0.796667	1.58326	0.000427075
Q9LK34	Uridine kinase-like protein 2, chloroplastic OS=Arabidopsis thaliana GN=UKL2 PE=2 SV=1 - [UKL2_ARATH]	0	7.45	31	1	4	4	483	54.2	6.38	0.735	0.865	0.805	1.19	1.275	1.34	1.26833	0.801667	1.58212	0.00124683
O49641	Putative uncharacterized protein AT4g22360 OS=Arabidopsis thaliana GN=At4g22360 PE=4 SV=1 - [O49641_ARATH]	0	6.23	3	3	3	4	369	40.8	8.5	0.841	0.757	0.797	1.242	1.342	1.205	1.263	0.798333	1.58205	0.000615346
Q943Z6	Signal recognition particle 19 kDa protein OS=Arabidopsis thaliana GN=SRP19 PE=1 SV=1 - [SRP19_ARATH]	0	40	1	5	5	5	145	16.3	10.01	0.748	0.833	0.751	1.31	1.07	1.306	1.22867	0.777333	1.58062	0.00581711
O23523	AT4g16830/dl4440w OS=Arabidopsis thaliana GN=dl4440w PE=1 SV=1 - [O23523_ARATH]	123.8	20.28	4	5	6	14	355	37.4	8.06	0.82	0.769	0.805	1.236	1.267	1.28	1.261	0.798	1.5802	2.06e-05
P57106	Malate dehydrogenase, cytoplasmic 2 OS=Arabidopsis thaliana GN=MDH2 PE=1 SV=1 - [MDHC2_ARATH]	373.24	37.05	9	2	13	40	332	35.7	6.79	0.833	0.871	0.7	1.225	1.389	1.184	1.266	0.801333	1.57987	0.00463601
F4IVE5	Nucleolar RNA binding protein NOP10 OS=Arabidopsis thaliana GN=NOP10 PE=4 SV=1 - [F4IVE5_ARATH]	0	20.63	2	1	1	1	63	7.3	9.35	0.911	0.703	0.791	1.36	1.145	1.293	1.266	0.801667	1.57921	0.00607665
B3H5W3	Uncharacterized protein OS=Arabidopsis thaliana GN=At5g22280 PE=4 SV=1 - [B3H5W3_ARATH]	18.05	14	3	2	2	2	100	12	8.21	0.884	0.746	0.771	1.291	1.185	1.303	1.25967	0.800333	1.57393	0.00125687
P34790	Peptidyl-prolyl cis-trans isomerase CYP18-3 OS=Arabidopsis thaliana GN=CYP18-3 PE=1 SV=1 - [CP18C_ARATH]	1311.35	89.53	6	7	15	181	172	18.4	7.81	0.778	0.793	0.806	1.23	1.346	1.151	1.24233	0.792333	1.56794	0.00141121
O23512	Probable pheophorbidase OS=Arabidopsis thaliana GN=PPD PE=2 SV=1 - [PPD_ARATH]	0	2.67	1	1	1	2	262	29	5.71	0.813	0.866	0.742	1.374	1.277	1.135	1.262	0.807	1.56382	0.00433308
Q84VZ7	At2g03440 OS=Arabidopsis thaliana GN=At2g03440 PE=2 SV=1 - [Q84VZ7_ARATH]	30.11	8.56	2	2	2	3	187	19.7	7.83	0.752	0.834	0.813	1.368	1.301	1.081	1.25	0.799667	1.56315	0.00750204
Q9M0V5	At4g05400 OS=Arabidopsis thaliana GN=At4g05400 PE=2 SV=1 - [Q9M0V5_ARATH]	19.03	19.2	1	4	4	5	250	27.6	9.44	0.826	0.845	0.797	1.298	1.313	1.246	1.28567	0.822667	1.5628	4.72e-05
Q9SE33	Cysteine and histidine-rich domain-containing protein RAR1 OS=Arabidopsis thaliana GN=RAR1 PE=1 SV=1 - [RAR1_ARATH]	36.84	7.52	1	1	1	2	226	24.9	7.23	0.905	0.696	0.814	1.396	1.116	1.257	1.25633	0.805	1.56066	0.0110727
Q8LCK1	Putative uncharacterized protein OS=Arabidopsis thaliana PE=2 SV=1 - [Q8LCK1_ARATH]	34.48	18.1	3	1	1	1	116	12.5	4.6	0.835	0.839	0.749	1.19	1.246	1.336	1.25733	0.807667	1.55675	0.000960249
O64764	Thioredoxin O1, mitochondrial OS=Arabidopsis thaliana GN=At2g35010 PE=2 SV=1 - [TRXO1_ARATH]	164.03	29.38	1	5	5	7	194	21.2	9.39	0.75	0.855	0.857	1.258	1.397	1.169	1.27467	0.820667	1.55321	0.00378952
Q42330	Defensin-like protein 192 OS=Arabidopsis thaliana GN=ATTI7 PE=2 SV=2 - [DF192_ARATH]	690.19	35.71	2	3	3	45	98	11	6.47	0.836	0.67	0.896	1.266	1.197	1.267	1.24333	0.800667	1.55287	0.0034512
Q9LZ06	Glutathione S-transferase L3 OS=Arabidopsis thaliana GN=GSTL3 PE=2 SV=1 - [GSTL3_ARATH]	0	4.26	1	1	1	1	235	27.1	5.2	0.844	0.86	0.727	1.222	1.336	1.215	1.25767	0.810333	1.55204	0.001463
Q9LYK5	Putative uncharacterized protein T15N1_30 OS=Arabidopsis thaliana GN=T15N1_30 PE=4 SV=1 - [Q9LYK5_ARATH]	18.35	10	3	5	5	6	530	57.1	6.37	0.878	0.779	0.791	1.243	1.185	1.363	1.26367	0.816	1.54861	0.00183452
F4J117	Phosphoglucan phosphatase LSF1, chloroplastic OS=Arabidopsis thaliana GN=LSF1 PE=1 SV=1 - [LSF1_ARATH]	0	1.35	1	1	1	1	591	65.7	9.03	0.877	0.505	1.058	1.476	1.267	1.035	1.25933	0.813333	1.54836	0.0971209
Q9M2D8	Uncharacterized protein At3g61260 OS=Arabidopsis thaliana GN=At3g61260 PE=1 SV=1 - [Y3126_ARATH]	180.24	35.38	1	6	9	23	212	23.1	5.64	0.768	0.835	0.821	1.221	1.367	1.161	1.24967	0.808	1.54662	0.00237814
Q9SII8	Ubiquitin domain-containing protein DSK2b OS=Arabidopsis thaliana GN=DSK2B PE=1 SV=1 - [DSK2B_ARATH]	158.05	32.67	1	7	13	19	551	58	4.93	0.729	0.835	0.852	1.276	1.198	1.261	1.245	0.805333	1.54594	0.00063066
Q9C504	At1g31760 OS=Arabidopsis thaliana GN=F27M3_4 PE=2 SV=1 - [Q9C504_ARATH]	41.45	19.64	1	2	2	4	112	12.3	9.83	0.814	0.827	0.799	1.302	1.318	1.151	1.257	0.813333	1.54549	0.00118037
Q9SII9	Ubiquitin domain-containing protein DSK2a OS=Arabidopsis thaliana GN=DSK2A PE=1 SV=2 - [DSK2A_ARATH]	171.12	26.77	1	5	11	19	538	57.2	4.79	0.829	0.801	0.833	1.277	1.297	1.225	1.26633	0.821	1.54243	4.72e-05
Q94A97	Ubiquitin-conjugating enzyme E2 35 OS=Arabidopsis thaliana GN=UBC35 PE=1 SV=1 - [UBC35_ARATH]	51.42	37.25	4	5	5	8	153	17.2	7.34	0.876	0.787	0.757	1.254	1.259	1.218	1.24367	0.806667	1.54174	0.000326225
Q9SEU6	Thioredoxin M4, chloroplastic OS=Arabidopsis thaliana GN=At3g15360 PE=2 SV=2 - [TRXM4_ARATH]	46.99	16.58	1	3	3	4	193	21.2	9.57	0.871	0.75	0.808	1.26	1.29	1.194	1.248	0.809667	1.54138	0.00062198
Q9LEA8	Cytidine deaminase 1 (Fragment) OS=Arabidopsis thaliana GN=cda1 PE=2 SV=1 - [Q9LEA8_ARATH]	0	9.7	3	1	1	1	237	25.9	5.29	0.828	0.856	0.76	1.329	1.219	1.218	1.25533	0.814667	1.54092	0.000696063
O49627	Iron-sulfur cluster assembly protein 1 OS=Arabidopsis thaliana GN=ISU1 PE=2 SV=1 - [ISU1_ARATH]	20.78	25.75	2	4	4	8	167	17.9	8.98	0.793	0.828	0.783	1.275	1.222	1.204	1.23367	0.801333	1.53952	6.88e-05
Q38936	Peptidyl-prolyl cis-trans isomerase FKBP15-2 OS=Arabidopsis thaliana GN=FKBP15-2 PE=2 SV=2 - [FK152_ARATH]	88.63	33.13	1	4	5	12	163	17.6	5.41	0.761	0.821	0.819	1.224	1.252	1.216	1.23067	0.800333	1.53769	4.4e-05
Q0WNB9	Putative uncharacterized protein At3g13224 (Fragment) OS=Arabidopsis thaliana GN=At3g13224 PE=2 SV=1 - [Q0WNB9_ARATH]	0	19.51	3	4	4	4	205	23.2	6.55	0.852	0.765	0.779	1.197	1.264	1.223	1.228	0.798667	1.53756	0.000208293
Q8VY84	Probable UMP-CMP kinase 1 OS=Arabidopsis thaliana GN=UMK1 PE=2 SV=1 - [KCY1_ARATH]	27.92	11.76	4	2	2	3	204	23	5.73	0.75	0.847	0.836	1.176	1.148	1.412	1.24533	0.811	1.53555	0.00821253
Q9SKQ0	Peptidyl-prolyl cis-trans isomerase CYP19-2 OS=Arabidopsis thaliana GN=CYP19-2 PE=1 SV=1 - [CP19B_ARATH]	1133.76	66.67	5	3	11	116	174	18.5	8.16	0.851	0.804	0.798	1.157	1.413	1.195	1.255	0.817667	1.53486	0.00582245
O64517	Metacaspase-4 OS=Arabidopsis thaliana GN=AMC4 PE=1 SV=1 - [MCA4_ARATH]	55.76	6.94	2	3	3	3	418	45.5	4.82	0.74	0.842	0.802	1.261	1.238	1.16	1.21967	0.794667	1.53482	0.000567017
Q9SZN7	Heavy metal-associated isoprenylated plant protein 26 OS=Arabidopsis thaliana GN=HIPP26 PE=1 SV=1 - [HIP26_ARATH]	0	7.19	1	1	1	1	153	17	9.16	1.289	0.57	0.541	0.898	0.795	1.99	1.22767	0.8	1.53458	0.399433
Q9FK81	Stress-response A/B barrel domain-containing protein At5g22580 OS=Arabidopsis thaliana GN=At5g22580 PE=1 SV=1 - [Y5258_ARATH]	48.59	18.02	1	2	2	3	111	12.3	5.73	0.821	0.915	0.753	1.245	1.413	1.16	1.27267	0.829667	1.53395	0.00729104
O48646	Probable phospholipid hydroperoxide glutathione peroxidase 6, mitochondrial OS=Arabidopsis thaliana GN=GPX6 PE=2 SV=2 - [GPX6_ARATH]	300.22	45.69	1	9	10	39	232	25.6	9.35	0.796	0.804	0.844	1.202	1.397	1.149	1.24933	0.814667	1.53355	0.00481514
Q9SK09	Vicilin-like seed storage protein At2g28490 OS=Arabidopsis thaliana GN=At2g28490 PE=2 SV=1 - [VCL22_ARATH]	1733.59	49.32	1	22	22	309	511	55.7	6.16	0.811	0.773	0.848	1.237	1.236	1.252	1.24167	0.810667	1.53166	4.2e-05
O81126	Serine/arginine-rich splicing factor RSZ22 OS=Arabidopsis thaliana GN=RSZ22 PE=1 SV=1 - [RSZ22_ARATH]	42.37	17	1	1	4	7	200	22.4	11.44	0.828	0.778	0.843	1.266	1.315	1.166	1.249	0.816333	1.53001	0.000841959
Q9FKP0	50S ribosomal protein 6, chloroplastic OS=Arabidopsis thaliana GN=PSRP6 PE=3 SV=1 - [PSRP6_ARATH]	0	7.55	1	1	1	1	106	11	10.1	0.808	0.774	0.87	1.179	1.461	1.111	1.25033	0.817333	1.52977	0.0174091
Q38900	Peptidyl-prolyl cis-trans isomerase CYP19-1 OS=Arabidopsis thaliana GN=CYP19-1 PE=1 SV=1 - [CP19A_ARATH]	415.38	60.12	2	6	8	34	173	18.5	8.43	0.759	0.87	0.79	1.203	1.252	1.24	1.23167	0.806333	1.52749	0.00030038
O80897	At2g32600/T26B15.16 OS=Arabidopsis thaliana GN=At2g32600 PE=2 SV=2 - [O80897_ARATH]	0	10.11	1	2	2	2	277	31.3	9.6	0.799	0.813	0.821	1.191	1.158	1.361	1.23667	0.811	1.52487	0.00253502
Q9FFE0	Putative 4-hydroxy-4-methyl-2-oxoglutarate aldolase 2 OS=Arabidopsis thaliana GN=At5g16450 PE=1 SV=1 - [RRAA2_ARATH]	0	18.07	2	3	3	4	166	17.8	5.58	0.814	0.815	0.813	1.185	1.308	1.228	1.24033	0.814	1.52375	0.000292436
Q9SJN0	Protein ABSCISIC ACID-INSENSITIVE 5 OS=Arabidopsis thaliana GN=ABI5 PE=1 SV=1 - [ABI5_ARATH]	21.24	7.24	1	3	3	4	442	47	8.95	0.915	0.702	0.811	1.21	1.278	1.205	1.231	0.809333	1.521	0.00305428
Q9M9P5	Adenine nucleotide alpha hydrolases-like protein OS=Arabidopsis thaliana GN=T17B22.4 PE=4 SV=1 - [Q9M9P5_ARATH]	64.99	16.98	2	3	3	5	159	17.4	7.37	0.772	0.793	0.824	1.344	0.955	1.33	1.20967	0.796333	1.51905	0.032223
Q9LDB4	Non-specific lipid-transfer protein 6 OS=Arabidopsis thaliana GN=LTP6 PE=2 SV=1 - [NLTP6_ARATH]	29.74	9.73	2	1	1	1	113	11.9	7.47	0.869	0.734	0.851	1.127	1.227	1.366	1.24	0.818	1.51589	0.00652919
Q9ASS2	Protein FREE1 OS=Arabidopsis thaliana GN=FREE1 PE=1 SV=1 - [FREE1_ARATH]	50.67	18.14	2	8	8	10	601	65.4	6.79	0.795	0.778	0.816	1.178	1.211	1.229	1.206	0.796333	1.51444	2.48e-05
Q9M9W2	At3g05570 OS=Arabidopsis thaliana GN=F18C1.16 PE=2 SV=1 - [Q9M9W2_ARATH]	0	16.67	1	1	1	1	90	10	6.54	0.68	0.925	0.865	1.144	1.353	1.239	1.24533	0.823333	1.51255	0.0114476
Q9SAD7	Eukaryotic translation initiation factor 4B2 OS=Arabidopsis thaliana GN=EIF4B2 PE=1 SV=1 - [IF4B2_ARATH]	43.39	25.87	1	13	14	20	549	59.3	8.72	0.793	0.807	0.849	1.205	1.286	1.209	1.23333	0.816333	1.51082	0.000182842
Q8RWU7	Plant UBX domain-containing protein 4 OS=Arabidopsis thaliana GN=PUX4 PE=1 SV=1 - [PUX4_ARATH]	38.04	10.89	2	3	3	4	303	32.9	5.95	0.759	0.878	0.788	1.3	1.164	1.198	1.22067	0.808333	1.5101	0.00161831
Q9LZC5	GDSL esterase/lipase At5g03820 OS=Arabidopsis thaliana GN=At5g03820 PE=3 SV=1 - [GDL73_ARATH]	145.65	12.71	2	4	4	11	354	38.5	6.74	0.869	0.748	0.841	1.216	1.181	1.311	1.236	0.819333	1.50854	0.00145001
Q9FWQ7	F17F16.6 protein OS=Arabidopsis thaliana GN=F17F16.6 PE=4 SV=1 - [Q9FWQ7_ARATH]	93.56	39.11	3	6	6	12	202	21.7	5.15	0.865	0.774	0.833	1.212	1.258	1.255	1.24167	0.824	1.50688	0.00016502
F4I1G1	Uncharacterized protein OS=Arabidopsis thaliana GN=At1g29350 PE=4 SV=1 - [F4I1G1_ARATH]	98.32	11.67	5	7	7	8	831	90.8	5.85	0.818	0.797	0.856	1.239	1.324	1.158	1.24033	0.823667	1.50587	0.00121661
Q9C658	Protein decapping 5 OS=Arabidopsis thaliana GN=DCP5 PE=1 SV=1 - [DCP5_ARATH]	66.8	9.49	1	5	5	9	611	64.3	7.71	0.857	0.751	0.85	1.258	1.222	1.217	1.23233	0.819333	1.50407	0.000350774
F4JQ55	HSP90-like protein GRP94 OS=Arabidopsis thaliana GN=SHD PE=3 SV=1 - [F4JQ55_ARATH]	0	1.7	3	1	1	1	823	94.1	5.01	0.813	0.817	0.849	1.363	1.128	1.236	1.24233	0.826333	1.50343	0.00378649
Q9FE18	Peptidyl-prolyl cis-trans isomerase NIMA-interacting 4 OS=Arabidopsis thaliana GN=T1K7.8 PE=2 SV=1 - [Q9FE18_ARATH]	77.36	30.28	1	3	3	5	142	14.8	9.52	0.658	0.806	0.919	1.128	1.212	1.242	1.194	0.794333	1.50315	0.00852154
F4IP13	Protein SHOOT GRAVITROPISM 6 OS=Arabidopsis thaliana GN=SGR6 PE=2 SV=1 - [SHGR6_ARATH]	0	0.7	1	1	1	1	1716	189.3	6.3	0.824	0.886	0.759	1.114	1.233	1.364	1.237	0.823	1.50304	0.00692067
P50699	Thaumatin-like protein OS=Arabidopsis thaliana GN=At1g18250 PE=2 SV=2 - [TLPH_ARATH]	43.73	5.35	2	1	1	1	243	25.9	8.47	0.809	0.918	0.747	1.217	1.124	1.374	1.23833	0.824667	1.50162	0.00946324
H3K2Y6	Mediator of RNA polymerase II transcription subunit 12 OS=Arabidopsis thaliana GN=MED12 PE=1 SV=1 - [MED12_ARATH]	0	0.58	1	1	1	1	2235	247.1	8.72	0.705	0.7	1.063	1.191	0.84	1.674	1.235	0.822667	1.50122	0.201406
Q94AL6	Putative uncharacterized protein At4g20150 OS=Arabidopsis thaliana GN=At4g20150 PE=2 SV=1 - [Q94AL6_ARATH]	0	13.58	2	1	1	2	81	9.2	8.51	0.915	0.773	0.784	1.189	1.427	1.093	1.23633	0.824	1.5004	0.0195364
C0Z2E9	AT5G35630 protein OS=Arabidopsis thaliana GN=At5g35630 PE=2 SV=1 - [C0Z2E9_ARATH]	42.16	7.91	2	1	1	1	278	30.7	7.71	1.178	1.258	1.118	0.752	0.761	0.852	0.788333	1.18467	0.665447	0.0015473
P11829	Acyl carrier protein 1, chloroplastic OS=Arabidopsis thaliana GN=ACP1 PE=1 SV=1 - [ACP1_ARATH]	0	19.71	1	4	4	6	137	15	7.14	1.1	1.214	1.239	0.786	0.852	0.715	0.784333	1.18433	0.662257	0.00235775
O81329	F3D13.5 protein OS=Arabidopsis thaliana GN=F3D13.5 PE=4 SV=1 - [O81329_ARATH]	0	6.93	2	1	1	1	202	22.3	9.91	1.135	1.204	1.226	0.692	0.792	0.865	0.783	1.18833	0.658906	0.00208645
P56802	30S ribosomal protein S11, chloroplastic OS=Arabidopsis thaliana GN=rps11 PE=3 SV=1 - [RR11_ARATH]	0	13.04	1	2	2	3	138	15	12.25	1.245	1.131	1.176	0.841	0.695	0.79	0.775333	1.184	0.654842	0.00164816
Q9ZQH3	At2g27460 OS=Arabidopsis thaliana GN=At2g27460 PE=2 SV=1 - [Q9ZQH3_ARATH]	0	2.15	1	1	1	1	745	82.5	4.94	1.378	1.045	1.155	0.89	0.609	0.823	0.774	1.19267	0.648966	0.0319024
O65583	Uridine kinase-like protein 4 OS=Arabidopsis thaliana GN=UKL4 PE=2 SV=2 - [UKL4_ARATH]	0	7.46	30	1	3	3	469	52.6	6.86	1.178	1.266	1.153	0.715	0.807	0.793	0.771667	1.199	0.643592	0.000665779
Q9FX60	Histone H3-like 1 OS=Arabidopsis thaliana GN=At1g13370 PE=2 SV=3 - [H3L1_ARATH]	54.48	23.53	2	1	5	11	136	15.3	11.17	1.186	1.258	1.147	0.765	0.802	0.719	0.762	1.197	0.636591	0.000422432
Q9LKR3	Mediator of RNA polymerase II transcription subunit 37a OS=Arabidopsis thaliana GN=MED37A PE=1 SV=1 - [MD37A_ARATH]	1221.17	52.62	2	3	35	119	669	73.6	5.17	1.21	1.217	1.176	0.771	0.865	0.656	0.764	1.201	0.636137	0.00210369
Q8LDI4	Quinone oxidoreductase-like protein OS=Arabidopsis thaliana PE=2 SV=1 - [Q8LDI4_ARATH]	228.08	23.03	15	1	7	21	343	38.1	8.02	1.225	1.314	1.084	0.804	0.752	0.734	0.763333	1.20767	0.632073	0.00318395
F4K657	Biogenesis of lysosome-related organelles complex 1 subunit 2 OS=Arabidopsis thaliana GN=BLOS2 PE=1 SV=1 - [BL1S2_ARATH]	0	11.02	1	1	1	1	127	14.3	4.94	1.093	1.186	1.349	0.731	0.789	0.766	0.762	1.20933	0.630099	0.00430523
Q9C9C0	Serine protease SPPA, chloroplastic OS=Arabidopsis thaliana GN=SPPA PE=2 SV=1 - [SPPA1_ARATH]	0	1.18	1	1	1	2	677	75	9.14	1.018	1.563	1.037	0.838	0.654	0.777	0.756333	1.206	0.627142	0.073574
P56767	Photosystem I P700 chlorophyll a apoprotein A2 OS=Arabidopsis thaliana GN=psaB PE=3 SV=1 - [PSAB_ARATH]	0	1.63	1	1	1	1	734	82.4	7.4	1.478	1.013	1.132	0.885	0.589	0.783	0.752333	1.20767	0.622964	0.0502403
O48818	Expansin-A4 OS=Arabidopsis thaliana GN=EXPA4 PE=1 SV=1 - [EXPA4_ARATH]	0	4.67	1	1	1	1	257	27.8	9.67	1.485	1.071	1.067	0.599	0.786	0.849	0.744667	1.20767	0.616616	0.0425502
P37107	Signal recognition particle 54 kDa protein, chloroplastic OS=Arabidopsis thaliana GN=FFC PE=1 SV=1 - [SR54C_ARATH]	0	2.3	1	1	1	1	564	61.2	9.44	0.93	1.402	1.337	0.76	0.69	0.807	0.752333	1.223	0.615154	0.0360277
O65534	Putative uncharacterized protein AT4g32670 OS=Arabidopsis thaliana GN=F4D11.130 PE=4 SV=1 - [O65534_ARATH]	0	1.86	3	1	1	1	808	92.9	8.81	1.058	1.167	1.442	0.785	0.827	0.641	0.751	1.22233	0.614399	0.0208311
Q9LTX3	Pyridoxine/pyridoxamine 5'-phosphate oxidase 1, chloroplastic OS=Arabidopsis thaliana GN=PPOX1 PE=1 SV=1 - [PPOX1_ARATH]	0	1.7	1	1	1	1	530	59.3	7.36	1.438	1.088	1.111	0.743	0.651	0.839	0.744333	1.21233	0.613968	0.0202523
B0F481	Bifunctional dethiobiotin synthetase/7,8-diamino-pelargonic acid aminotransferase, mitochondrial OS=Arabidopsis thaliana GN=BIO3-BIO1 PE=1 SV=1 - [BIODA_ARATH]	0	0.84	1	1	1	1	833	91.9	6.73	1.218	1.185	1.254	0.761	0.739	0.74	0.746667	1.219	0.612524	2.39e-05
Q84W65	SufE-like protein 1, chloroplastic/mitochondrial OS=Arabidopsis thaliana GN=SUFE1 PE=1 SV=2 - [SUFE1_ARATH]	0	1.89	1	1	1	1	371	40.8	5.64	1.104	1.236	1.332	0.761	0.823	0.657	0.747	1.224	0.610294	0.00433526
F4INA0	Nicotinate-nucleotide pyrophosphorylase [carboxylating] OS=Arabidopsis thaliana GN=QPT PE=3 SV=1 - [F4INA0_ARATH]	0	3.2	4	1	1	1	281	30.8	5.87	1.125	1.285	1.264	0.843	0.571	0.821	0.745	1.22467	0.608329	0.00886658
Q9LMQ2	Chlorophyll A-B binding protein OS=Arabidopsis thaliana GN=F7H2.16 PE=1 SV=1 - [Q9LMQ2_ARATH]	35.7	3.88	2	1	1	3	258	27.5	7.4	1.193	1.282	1.228	0.758	0.753	0.716	0.742333	1.23433	0.601404	7.15e-05
F4KCI5	Sirtuin 2 OS=Arabidopsis thaliana GN=SRT2 PE=4 SV=1 - [F4KCI5_ARATH]	20.58	2.95	2	1	1	2	271	30.4	7.5	1.254	1.321	1.109	0.732	0.685	0.768	0.728333	1.228	0.593105	0.00172939
Q9SUC0	Probable 3-hydroxyisobutyrate dehydrogenase, mitochondrial OS=Arabidopsis thaliana GN=At4g20930 PE=2 SV=3 - [3HIDH_ARATH]	0	2.31	1	1	1	1	347	37.3	7.37	1.354	1.079	1.263	0.742	0.716	0.717	0.725	1.232	0.588474	0.00337346
Q84JH2	Nuclear transport factor 2 and RNA recognition motif domain-containing protein OS=Arabidopsis thaliana GN=At5g48650 PE=1 SV=1 - [Q84JH2_ARATH]	0	2.18	2	1	1	1	458	50	5.41	1.223	1.258	1.223	0.659	0.733	0.783	0.725	1.23467	0.587203	0.00017618
Q9SI61	Amidophosphoribosyltransferase 1, chloroplastic OS=Arabidopsis thaliana GN=ASE1 PE=2 SV=1 - [ASE1_ARATH]	28.67	5.65	2	1	3	3	566	61.8	6.23	1.37	1.053	1.278	0.772	0.722	0.678	0.724	1.23367	0.586868	0.00651163
Q9C8S5	Chlorophyll A-B-binding protein 2, 5' partial; 1-750 (Fragment) OS=Arabidopsis thaliana GN=T1P2.1 PE=4 SV=1 - [Q9C8S5_ARATH]	48.83	11.24	12	1	3	5	249	26.5	5.43	1.193	1.317	1.202	0.659	0.862	0.656	0.725667	1.23733	0.586476	0.00292851
P46422	Glutathione S-transferase F2 OS=Arabidopsis thaliana GN=GSTF2 PE=1 SV=3 - [GSTF2_ARATH]	273.64	67.92	3	1	13	38	212	24.1	6.35	1.133	1.327	1.257	0.667	0.874	0.621	0.720667	1.239	0.581652	0.00575656
P56779	Cytochrome b559 subunit alpha OS=Arabidopsis thaliana GN=psbE PE=1 SV=4 - [PSBE_ARATH]	39.11	14.46	1	1	1	1	83	9.4	4.94	1.212	1.106	1.422	0.783	0.574	0.779	0.712	1.24667	0.571123	0.00986955
O03042	Ribulose bisphosphate carboxylase large chain OS=Arabidopsis thaliana GN=rbcL PE=1 SV=1 - [RBL_ARATH]	426.05	55.32	13	2	28	84	479	52.9	6.29	1.243	1.202	1.264	0.725	0.75	0.641	0.705333	1.23633	0.570504	0.000146838
Q9LN66	At1g19320 OS=Arabidopsis thaliana GN=At1g19320 PE=2 SV=1 - [Q9LN66_ARATH]	51.56	10.53	2	2	2	2	247	25.4	6.46	1.247	1.129	1.344	0.627	0.661	0.831	0.706333	1.24	0.569624	0.00382425
O04090	Ferredoxin-1, chloroplastic OS=Arabidopsis thaliana GN=FD1 PE=1 SV=1 - [FER1_ARATH]	53.94	6.76	2	1	1	7	148	15.9	4.54	1.268	1.152	1.307	0.666	0.789	0.62	0.691667	1.24233	0.556748	0.00130986
Q5M731	Thiamine biosynthetic bifunctional enzyme TH1, chloroplastic OS=Arabidopsis thaliana GN=TH1 PE=1 SV=1 - [TPS1L_ARATH]	28.09	2.3	1	1	1	1	522	55.8	6.55	1.206	1.273	1.299	0.682	0.746	0.668	0.698667	1.25933	0.554791	0.000106606
Q38859	DNA-directed RNA polymerases II, IV and V subunit 11 OS=Arabidopsis thaliana GN=NRPB11 PE=1 SV=1 - [NRPBB_ARATH]	0	9.48	2	1	1	1	116	13.6	6.95	0.584	1.646	1.615	0.693	0.743	0.653	0.696333	1.28167	0.543303	0.169688
Q9LXX5	PsbP domain-containing protein 6, chloroplastic OS=Arabidopsis thaliana GN=PPD6 PE=1 SV=1 - [PPD6_ARATH]	0	8.02	1	1	1	4	262	28.6	9.26	1.387	1.018	1.408	0.742	0.607	0.681	0.676667	1.271	0.532389	0.0109499
Q8VYS0	Probable cysteine protease RD19D OS=Arabidopsis thaliana GN=RD19D PE=2 SV=1 - [RD19D_ARATH]	0	11.44	1	4	4	5	367	40.1	7.18	1.214	1.317	1.318	0.722	0.74	0.583	0.681667	1.283	0.531307	0.000572608
Q9M0X2	Putative uncharacterized protein AT4g05230 OS=Arabidopsis thaliana GN=At4g05230 PE=4 SV=1 - [Q9M0X2_ARATH]	0	2.91	2	1	1	1	206	23.7	7.05	0.715	1.797	1.395	0.684	0.636	0.683	0.667667	1.30233	0.51267	0.115138
Q3E9Z8	Putative F-box protein At4g17780 OS=Arabidopsis thaliana GN=At4g17780 PE=4 SV=2 - [FB236_ARATH]	0	2.26	1	1	1	1	398	46	8.27	0.586	1.312	2.042	0.761	0.564	0.644	0.656333	1.31333	0.499746	0.196341
Q8LAM9	Pollen coat-like protein OS=Arabidopsis thaliana PE=2 SV=1 - [Q8LAM9_ARATH]	0	13.43	3	1	1	1	67	7	9.19	1.242	1.297	1.37	0.698	0.651	0.59	0.646333	1.303	0.496035	0.000172162
Q9LXM8	60S acidic ribosomal protein P2-4 OS=Arabidopsis thaliana GN=RPP2D PE=2 SV=1 - [RLA24_ARATH]	0	9.01	1	1	1	1	111	11	4.5	0.961	1.571	1.413	0.662	0.605	0.657	0.641333	1.315	0.487706	0.0214393
Q8GYD9	Probable RNA helicase SDE3 OS=Arabidopsis thaliana GN=SDE3 PE=1 SV=1 - [SDE3_ARATH]	0	1.4	1	1	1	2	1002	113.3	5.06	0.815	1.523	1.511	0.63	0.65	0.586	0.622	1.283	0.484801	0.0480568
Q8W4S4	V-type proton ATPase subunit a3 OS=Arabidopsis thaliana GN=VHA-a3 PE=1 SV=1 - [VHAA3_ARATH]	43.25	7.92	3	1	6	7	821	92.8	5.94	1.35	1.323	1.302	0.551	0.55	0.727	0.609333	1.325	0.459874	0.000291454
Q9SZ50	At4g31830 OS=Arabidopsis thaliana GN=At4g31830 PE=2 SV=1 - [Q9SZ50_ARATH]	25.62	48	1	5	5	14	100	10.6	9.6	1.315	1.419	1.299	0.6	0.546	0.537	0.561	1.34433	0.417307	5.08e-05
A8MRH7	BRCA1/BRCA2-containing complex subunit 36B OS=Arabidopsis thaliana GN=At3g06820 PE=4 SV=1 - [A8MRH7_ARATH]	0	4.63	6	1	1	1	324	35.5	7.62	1.258	0.96	1.931	0.499	0.694	0.434	0.542333	1.383	0.392143	0.0476048
Q8VZK8	Probable thionin-2.3 OS=Arabidopsis thaliana GN=At2g15010 PE=2 SV=2 - [THN23_ARATH]	64.3	17.04	1	1	1	1	135	14.2	6.39	1.834	0.771	1.71	0.461	0.462	0.435	0.452667	1.43833	0.314716	0.042551
Q58FV2	Gamma-tubulin complex component OS=Arabidopsis thaliana GN=At4g00695 PE=2 SV=1 - [Q58FV2_ARATH]	39.02	17.19	2	2	2	2	128	14.7	7.11	0.826	1.626	1.996	0.389	0.471	0.456	0.438667	1.48267	0.295863	0.0393293
F4JCD4	Uncharacterized protein OS=Arabidopsis thaliana GN=At3g19780 PE=4 SV=1 - [F4JCD4_ARATH]	44.32	0.66	2	1	1	1	1058	118.9	5.87	0.745	1.832	2.14	0.358	0.38	0.273	0.337	1.57233	0.214331	0.0436352
